# Supplementary material for: BipA exerts temperature-dependent translational control of biofilm-associated colony morphology in Vibrio cholerae
Source: eLife. 2021 Feb 16;10:e60607. doi: 10.7554/eLife.60607 (PMC7886329; doi:10.7554/eLife.60607)
Supplement: Supplementary file 1. [file elife-60607-supp1.docx]

**Supplementary Information**

**BipA exerts temperature-dependent control of biofilm-associated colony morphology in *Vibrio cholerae***

Teresa del Peso Santos1, Laura Alvarez1, Brandon Sit2, Oihane Irazoki1, Jonathon Blake2, Benjamin R Warner4, Alyson R. Warr2, Anju Bala1, Vladimir Benes2, Matthew K. Waldor2, Kurt Fredrick4 and Felipe Cava1

1The laboratory for Molecular Infection Medicine Sweden (MIMS), Department of Molecular Biology. Umeå University. Umeå. Sweden.

2Howard Hughes Medical Institute, Brigham and Women's Hospital Division of Infectious Diseases and Harvard Medical School Department of Microbiology and Immunobiology, Boston, Massachusetts, USA.

3Genomics Core Facility, European Molecular Biology Laboratory (EMBL), Meyerhofstrasse 1, Heidelberg, Germany.

4Department of Microbiology, The Ohio State University, Columbus, OH 43210, USA; Center for RNA Biology, The Ohio State University, Columbus, OH 43210, USA.

Correspondence to: [felipe.cava@umu.se](mailto:felipe.cava@umu.se)

Keywords: biofilm, temperature, *Vibrio* *cholerae*, BipA, HapR, translation.

Running title: Temperature-dependent biofilm regulation in *Vibrio cholerae*

**Table of contents:**

Supplementary Figure 1

Supplementary Figure 2

Supplementary Figure 3

Supplementary Figure 4

Supplementary Figure 5

Supplementary Figure 6


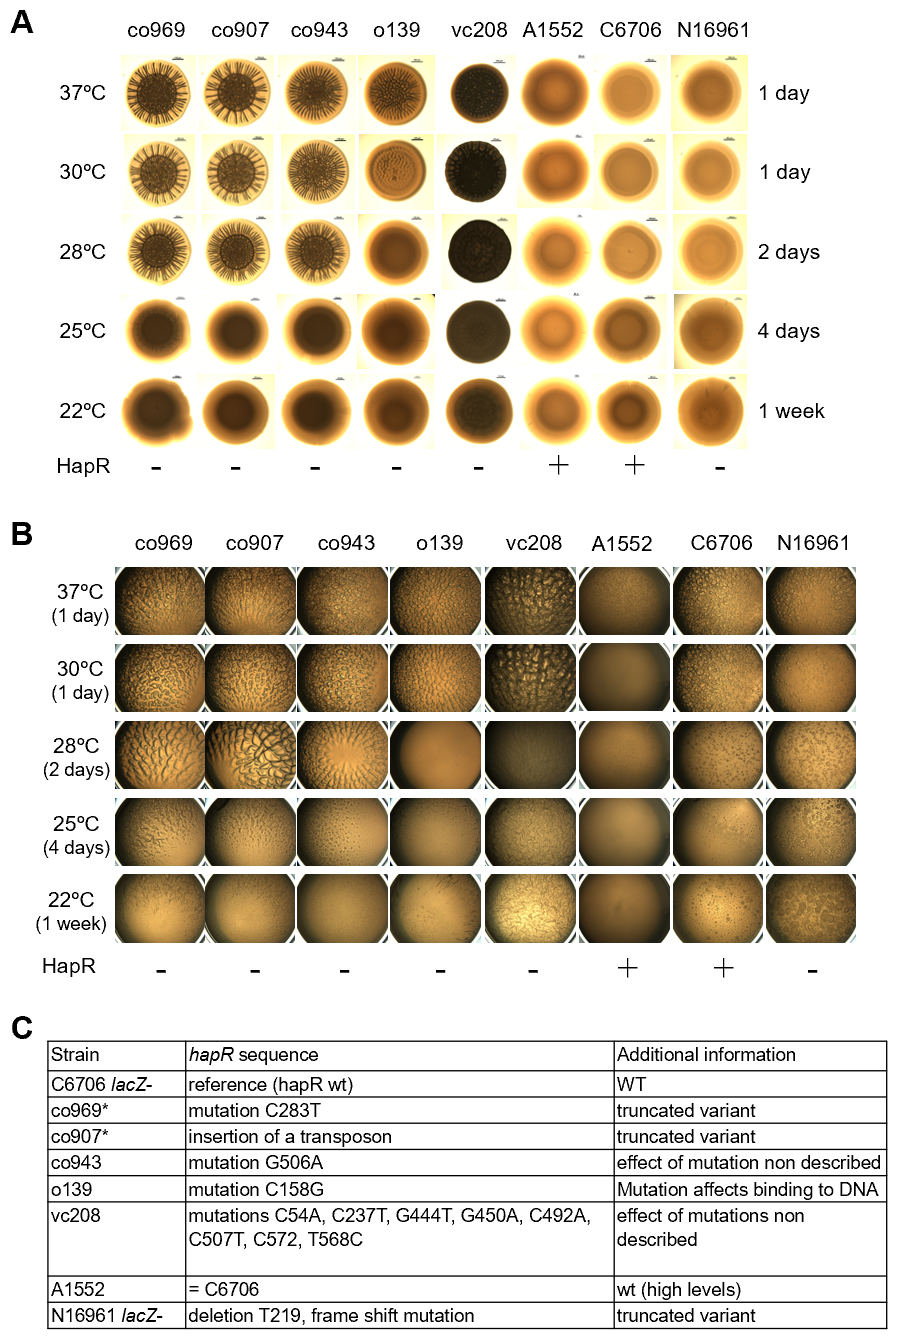


**Supplementary Figure 1.** Effect of temperature on CM and pellicle biofilm of different *V. cholerae* strains.

**A.** Effect of temperature on colony morphology (CM) of different *V. cholerae* strains.Pictures represent the maximum rugosity obtained for different *V. cholerae* strains incubated at different temperatures (37, 30, 28, 25 and 22ºC) during different times. The presence or absence of a functional variant of HapR in these strains is indicated. **B.** Pellicle biofilm formation for different *V. cholerae* strains incubated at different temperatures (37, 30, 28, 25 and 22ºC). The presence or absence of a functional variant of HapR is indicated. **C.** Table indicating the mutations in the *hapR* sequence of the above *V.* *cholerae* strains, which lead to truncated or inactive variants of the protein. Sequencing of *hapR* gene of the strains in panels A and B was performed in this study. To avoid any sequencing errors, sequencing was performed twice from two independent PCR products using primers FCP849 and FCP950 (Supplementary Table 3). The tool <http://web.expasy.org/translate/> allowed to identify which of the changes in the sequence resulted in truncated variants of the protein. The C158G substitution in strain o139 leads to a T53R substitution; T53 has been reported to be involved in binding of HapR to DNA (Singh et al 2014), with a T53A substitution only allowing very weak binding (De Silva et al 2007).


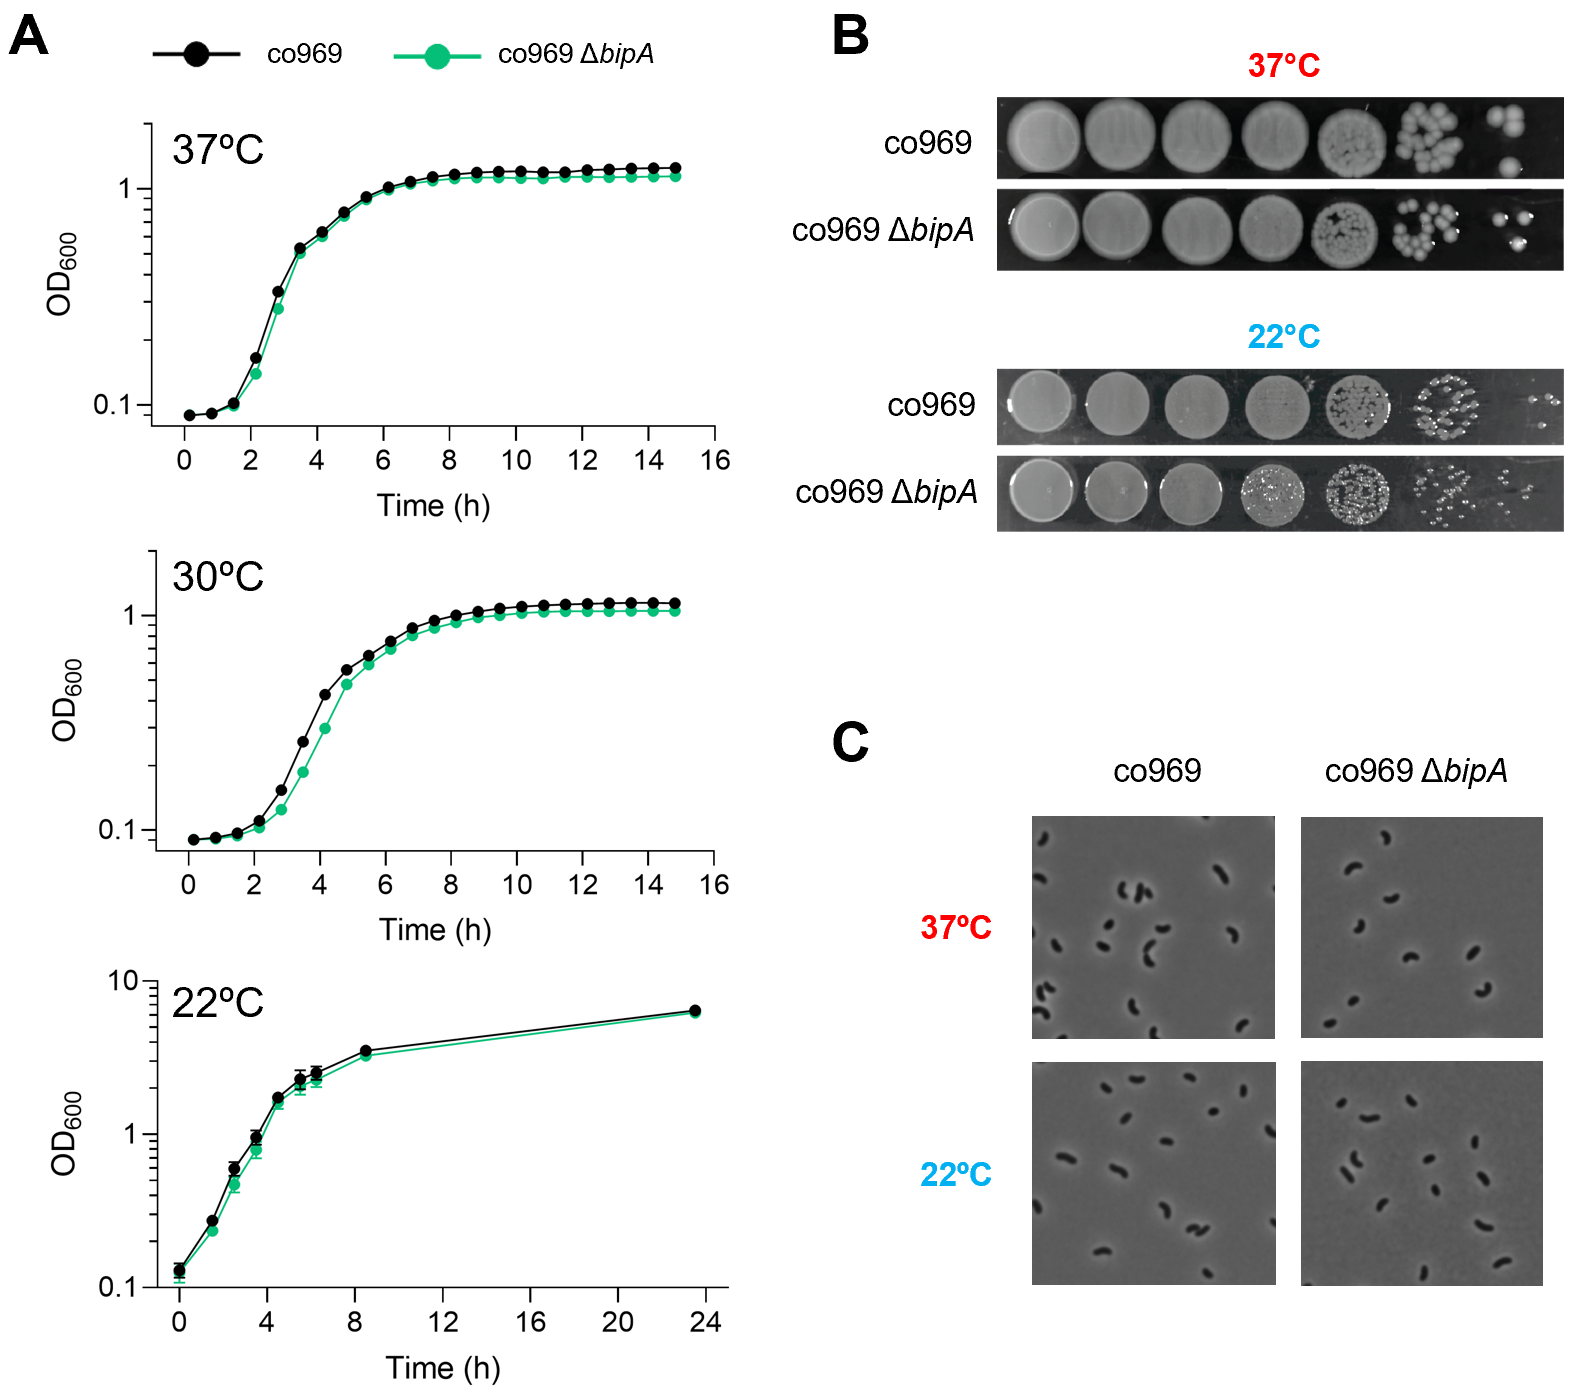


**Supplementary Figure 2.** Growth and cell morphology of *V. cholerae* co969 WT and Δ*bipA* strains at different temperatures. **A.** Growth curves ofWTand Δ*bipA*strains at 37, 30 and 22ºC. **B.** Viability of WT and Δ*bipA* strains at 37ºC and 22ºC. **C.** Morphology ofco969 and co969 Δ*bipA* grown at 37ºC or 22ºC in stationary phase.


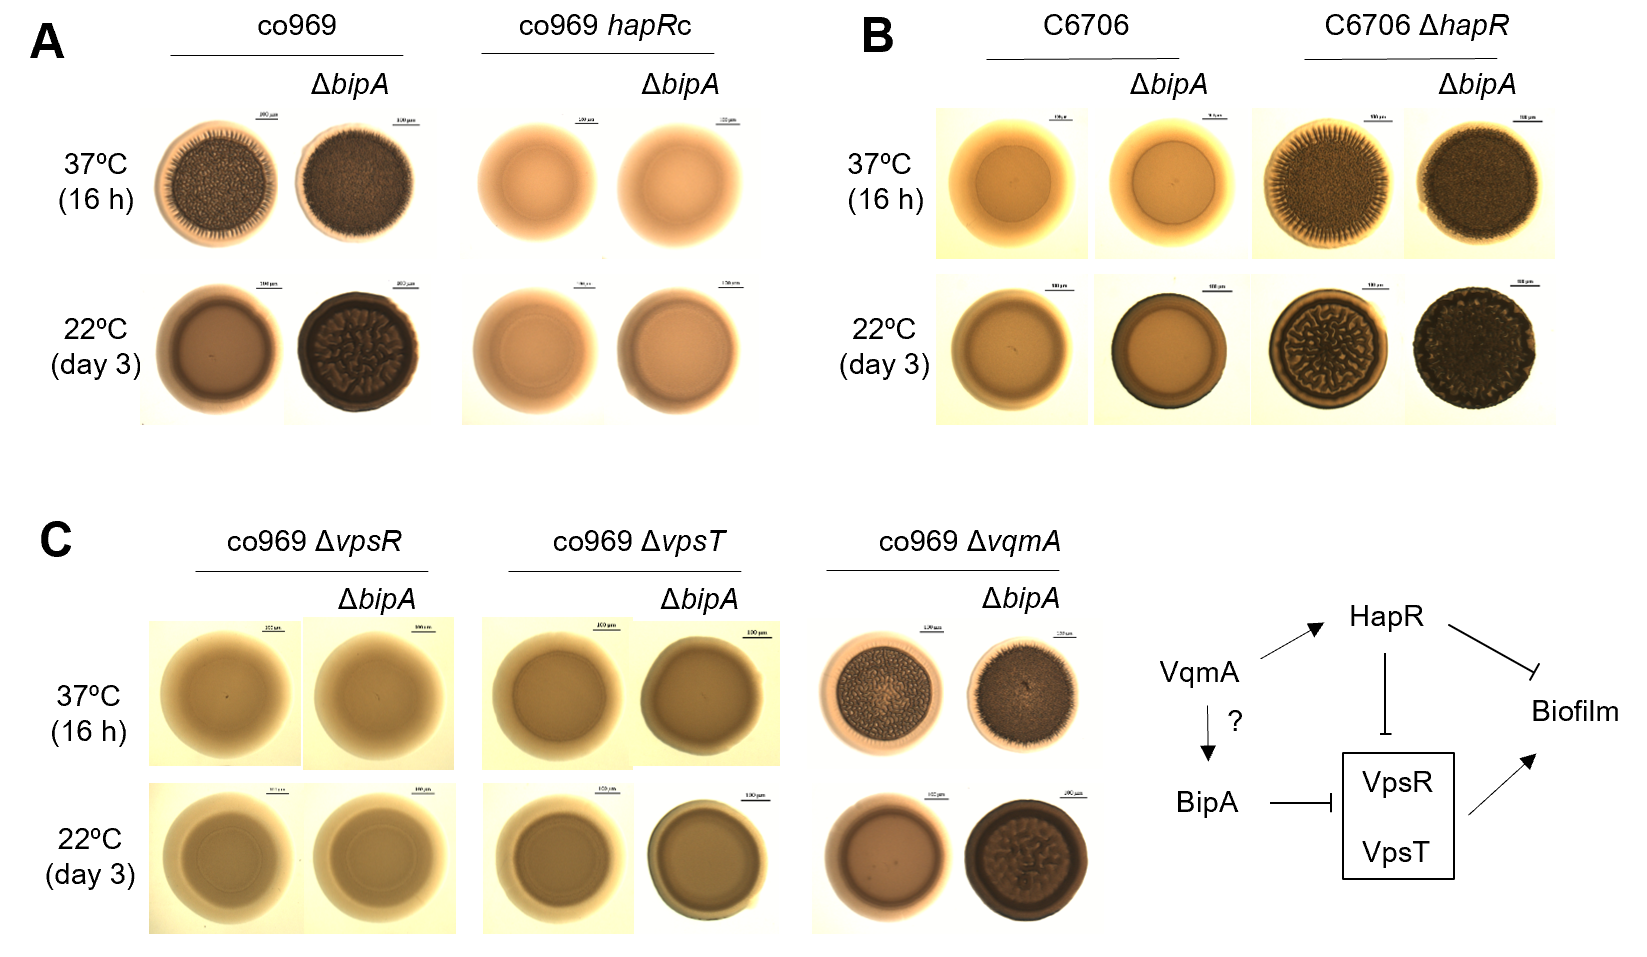


**Supplementary Figure 3.** Interplay of BipA with known biofilm regulators.

**A.** Colony morphology at 37ºC and 22ºC of co969, co969:*hapR*c (with a chromosomal replacement of the mutant *hapR* from co969 with the active *hapR* from C6706, *hapR*c), and their respective Δ*bipA* mutant variants. **B.** Colony morphology at 37ºC and 22ºC of C6706, C6706 Δ*hapR*, and their respective Δ*bipA* mutant variants. **C.** Colony morphology at 37ºC and 22ºC of co969, co969 Δ*vpsR*, co969 Δ*vpsT*, co969 Δ*vqmA*, and their respective Δ*bipA* mutant variants. To the right, schematic showing the impact of these different regulators on biofilm. The incubation times at 37ºC or 22ºC, leading to colonies with a similar number of CFUs/ colony, are indicated for each case.


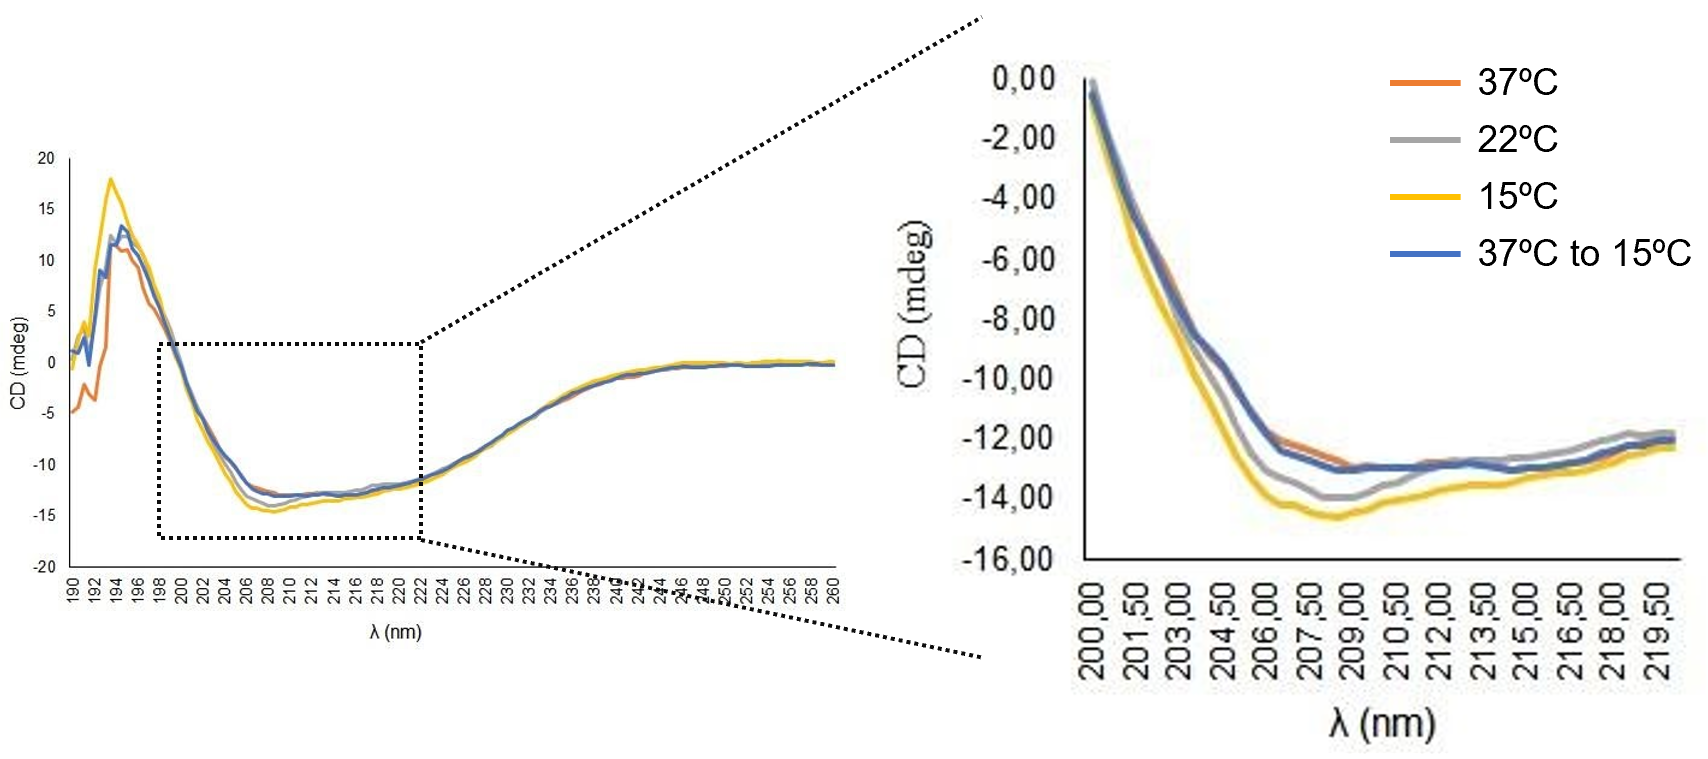


**Supplementary Figure 4.** BipA protein stability at different temperatures. Circular dichroism curve (mdeg represented against wavelength) of purified BipA-His pre-incubated at different temperatures (37ºC, 22ºC or 15ºC) for 30 min, or pre-incubated at 37ºC for 30 min and then sifted to 22ºC and further incubated for 30 min. Boxed graph shows the CD curve between 200 and 220 nm.


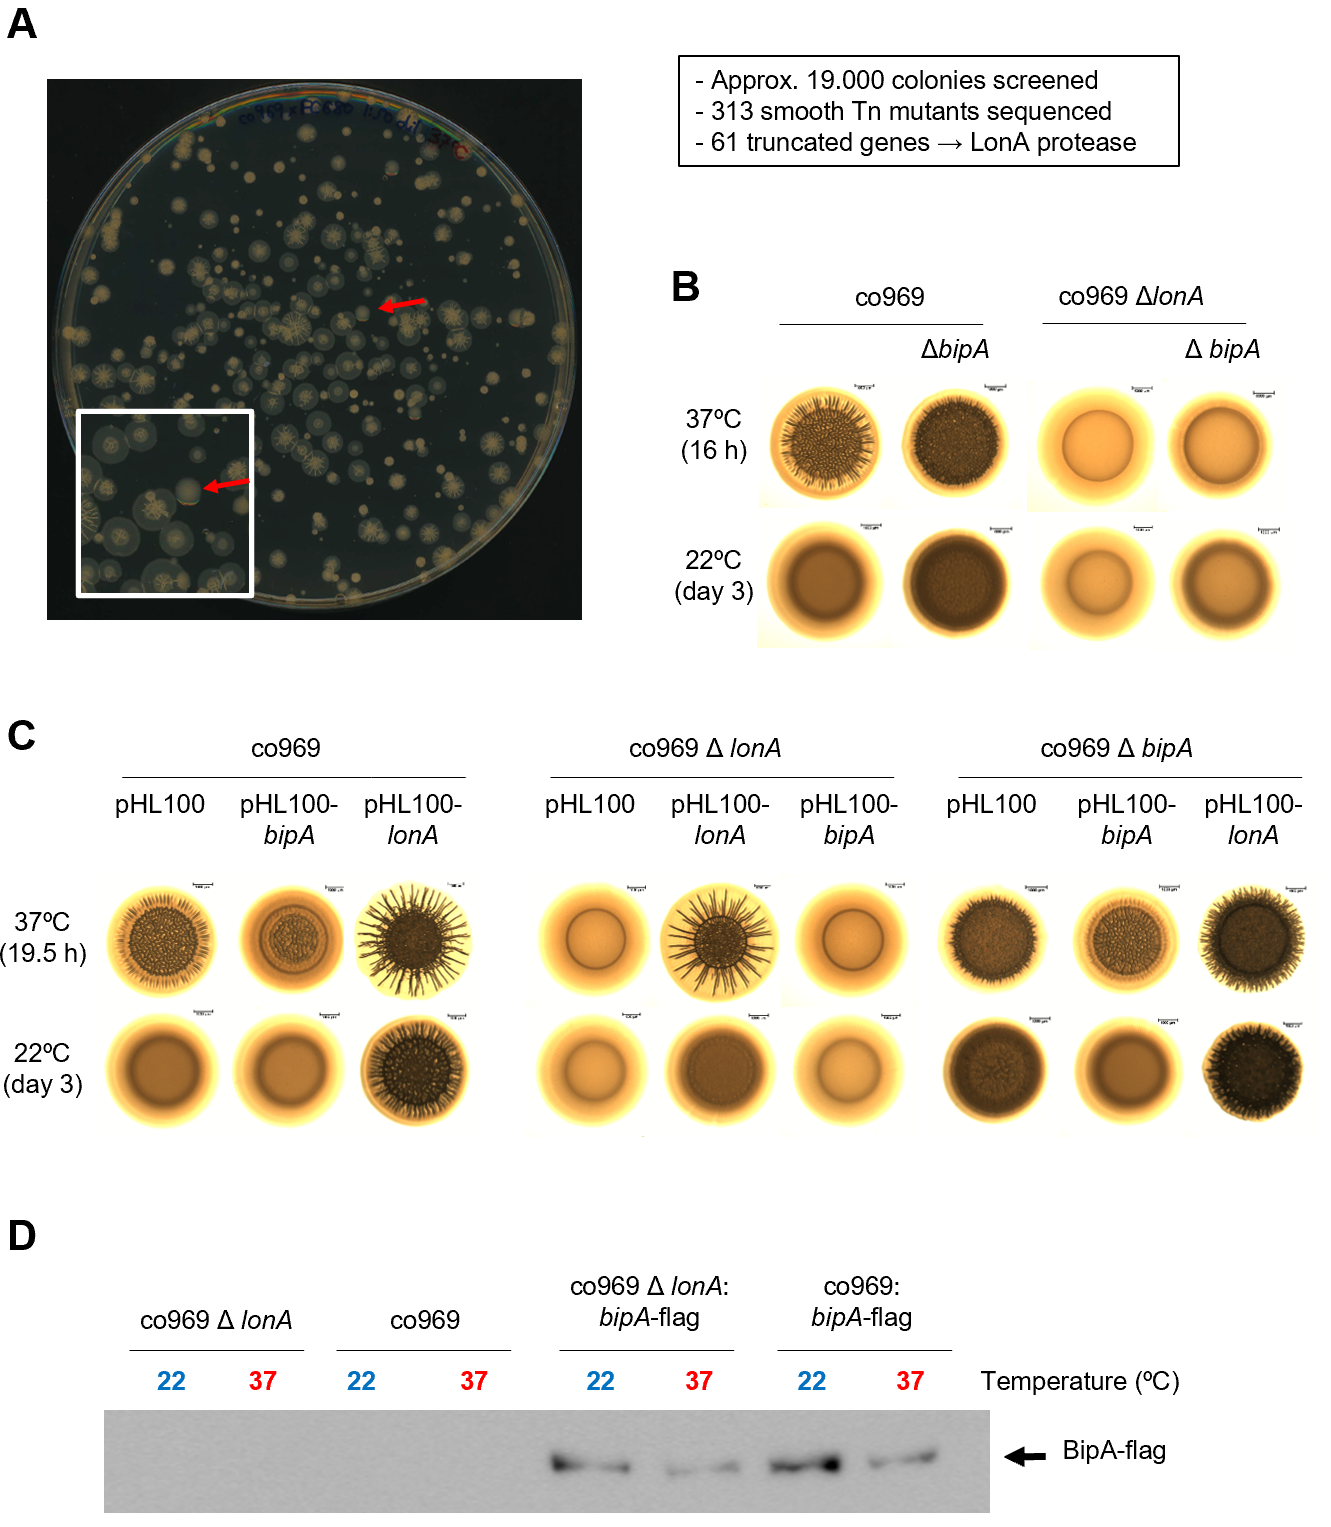


**Supplementary Figure 5.** *V. cholerae* BipA is not degraded by LonA protease.

**A.** Transposon mutagenesis screening for *V. cholerae* co969 mutants with a smooth colony morphology at 37ºC led to identification of LonA. Left, example of a LB (10 g/l NaCl) + Sm200 + Km50 agar plate used for selection of transposon mutants with a smooth colony phenotype at 37ºC (indicated with a red arrow). The number of screened transposon mutants, smooth colonies selected and final number of truncated genes is indicated to the right. **B.** Colony morphology at 37ºC and 22ºC of co969, co969 Δ*lonA* and their respective Δ*bipA* counterpart. **C.** Colony morphology at 37ºC and 22ºC of co969, co969 Δ*bipA* and co969 Δ*lonA*eithercarrying pHL100-*lonA* or pHL100-*bipA*, to either overexpress *lonA* or *bipA* from the IPTG-inducible P*lac* promoter, or the pHL100 empty vector. **D.** Western blot showing the BipA-flag levels from *V. cholerae* co969:*bipA*-flag and co969 Δ*lonA*:*bipA*-flag rugose colonies grown at 37ºC or smooth colonies grown at 22ºC. *V. cholerae* co969 and co969 Δ*lonA*strains were used as a negative control. The gel is a representative of 2 independent experiments, each containing 2 biological replicates, containing each biological replicate 2 colonies pooled together.


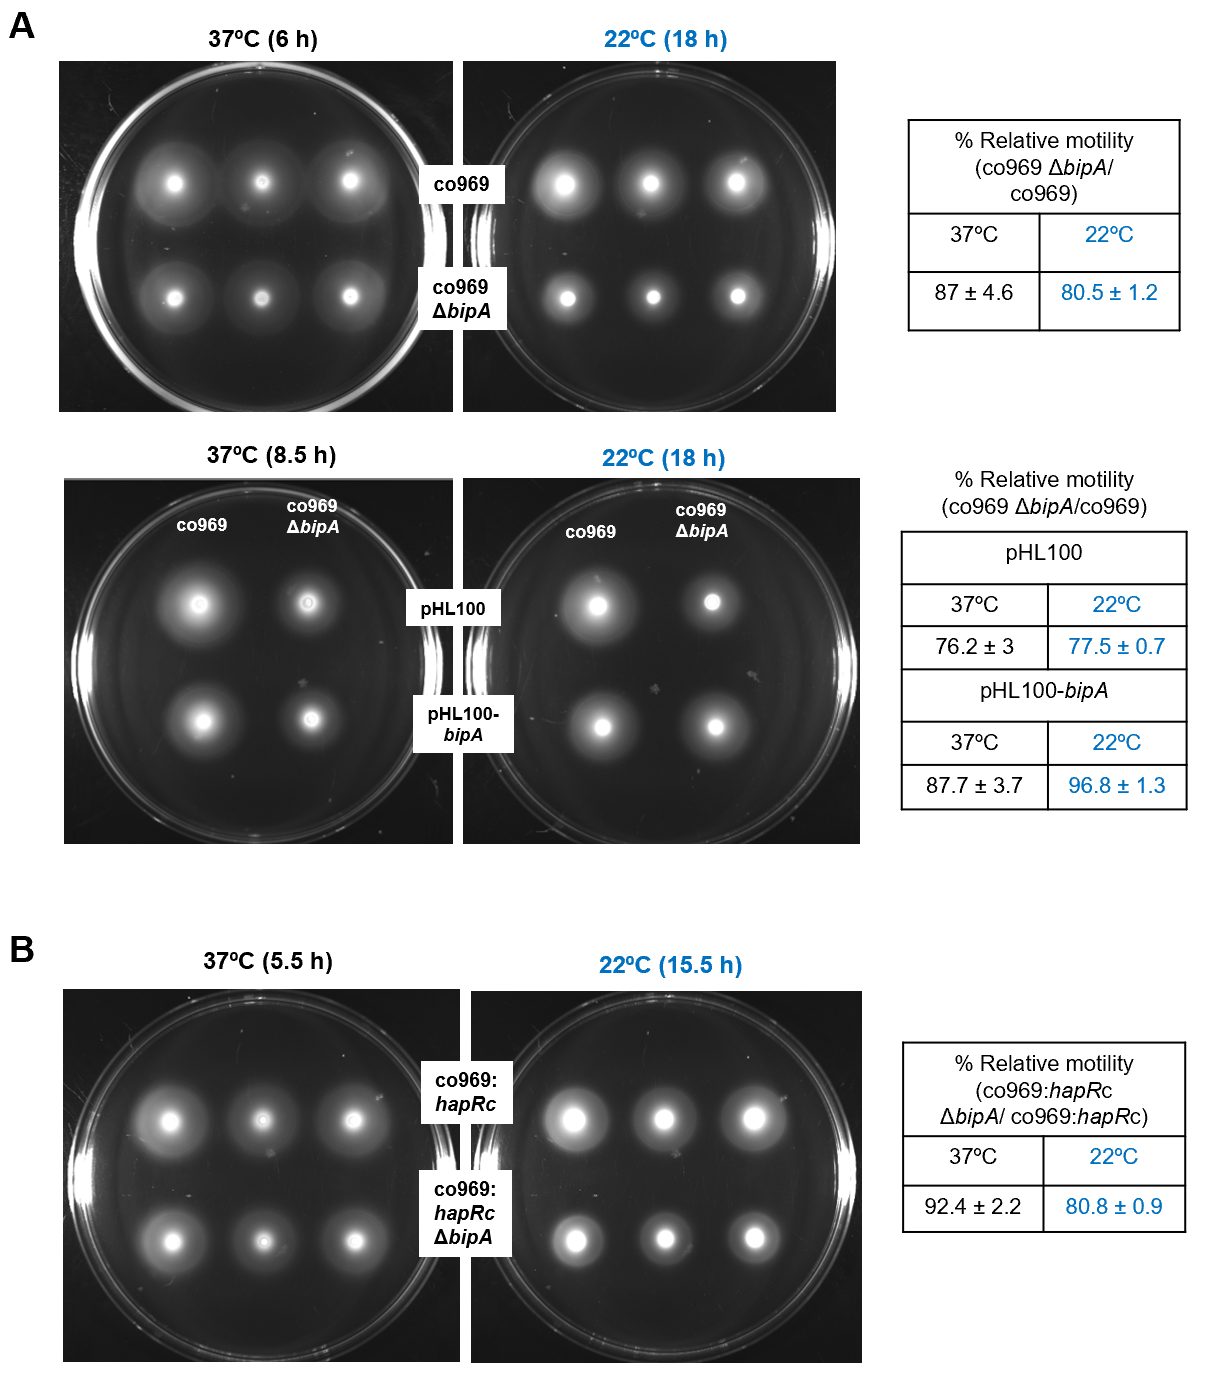


**Supplementary Figure 6.** Effect of BipA on motility.

**A.** Upper panel:motility of co969 and co969Δ*bipA* on 0.3% agar plates at 37ºC (left) and 22ºC (right) after the indicated times. The relative motility between co969Δ*bipA* and co969 (in %) at 37ºC or 22ºC is indicated on the right. Lower panel:motility of co969 and co969Δ*bipA* eithercarrying pHL100-*bipA*, for overexpression of *bipA* from the IPTG-inducible P*lac* promoter, or the empty plasmid pHL100 on 0.3% agar plates with Km (50 µg/ml) and IPTG (isopropyl-β-d-thiogalactosidase, 1 mM) at 37ºC (left) and 22ºC (right) after the indicated times. The relative motility between co969Δ*bipA* and co969 (in %), eithercarrying pHL100-*bipA* or pHL100, at 37ºC or 22ºC is indicated on the right. **B.** Motility of co969:*hapR*c and co969:*hapR*cΔ*bipA*, with a chromosomal exchange of the mutant *hapR* from co969 for the active *hapR* of C6706,on 0.3% agar plates at 37ºC (left) and 22ºC (right) after the indicated times. The relative motility between co969:*hapR*cΔ*bipA* and co969:*hapR*c (in %) at 37ºC or 22ºC is indicated to the right. Relative motility values are the average of 2 independent experiments each containing at least 3 biological replicates ± standard deviation.
