# Supplementary material for: BipA exerts temperature-dependent translational control of biofilm-associated colony morphology in Vibrio cholerae
Source: eLife. 2021 Feb 16;10:e60607. doi: 10.7554/eLife.60607 (PMC7886329; doi:10.7554/eLife.60607)
Supplement: Supplementary file 3. [file elife-60607-supp3.xlsx]

## Sheet: 22Sb vs 37R
Comparison 22 Sb vs 37R colonies (significant differentially expressed genes)
locus	baseMean	log2FoldChange	lfcSE	stat	pvalue	padj	locus	Symbol	GeneName	Class	ClassName	Description
VC_2691	145.539	4.88224	0.270811	18.0282	1.16977e-72	1.05705e-70	VC_2691	-	putative P pilus assembly/Cpx signaling pathway, periplasmic inhibitor/zinc- resistance associated protein	N, P, T, U	CELLULAR PROCESSES AND SIGNALING, METABOLISM, CELLULAR PROCESSES AND SIGNALING, CELLULAR PROCESSES AND SIGNALING	Cell motility, Inorganic ion transport and metabolism, Signal transduction mechanisms, Intracellular trafficking, secretion, and vesicular transport
VC_0935	430.852	4.61734	0.179138	25.7753	1.6794e-146	5.5644e-144	VC_0935	-	putative Capsular polysaccharide synthesis enzyme CpsB	S	POORLY CHARACTERIZED	Function unknown
VC_0918	518.937	4.565	0.180699	25.263	8.15373e-141	2.31566e-138	VC_0918	wecC	UDP-N-acetyl-D-mannosamine dehydrogenase	M	CELLULAR PROCESSES AND SIGNALING	Cell wall/membrane/envelope biogenesis
VC_0934	7128.76	4.44149	0.140964	31.5079	6.76159e-218	5.37681e-215	VC_0934	-	putative Capsular polysaccharide synthesis enzyme CpsA, sugar transferase	M	CELLULAR PROCESSES AND SIGNALING	Cell wall/membrane/envelope biogenesis
VC_1888	5944.63	3.93049	0.131204	29.957	3.56187e-197	2.02314e-194	VC_1888	vah3	Hemolysin	Q	METABOLISM	Secondary metabolites biosynthesis, transport and catabolism
VC_0937	1943.81	3.7645	0.102794	36.622	1.27967e-293	2.54399e-290	VC_0937	-	putative Capsular polysaccharide synthesis enzyme CpsD, exopolysaccharide synthesis	D, M	CELLULAR PROCESSES AND SIGNALING, CELLULAR PROCESSES AND SIGNALING	Cell cycle control, cell division, chromosome partitioning, Cell wall/membrane/envelope biogenesis
VC_0928	1159.47	3.6336	0.162422	22.3714	7.48154e-111	1.18986e-108	VC_0928	-	-	-	-	-
VC_A0883	1871.66	3.62084	0.111222	32.5549	1.78287e-232	1.77217e-229	VC_A0883	-	conserved hypothetical protein	N, T	CELLULAR PROCESSES AND SIGNALING, CELLULAR PROCESSES AND SIGNALING	Cell motility, Signal transduction mechanisms
VC_A0139	1966.25	3.55615	0.10758	33.056	1.27648e-239	1.69176e-236	VC_A0139	-	-	-	-	-
VC_0919	485.722	3.54208	0.146107	24.243	7.8302e-130	1.7296e-127	VC_0919	-	putative Trimeric LpxA-like enzyme	E	METABOLISM	Amino acid transport and metabolism
VC_0706	664.69	3.52249	0.135378	26.0196	2.96887e-149	1.18042e-146	VC_0706	raiA	Ribosome-associated inhibitor A	J	INFORMATION STORAGE AND PROCESSING	Translation, ribosomal structure and biogenesis
VC_0932	559.31	3.51999	0.137903	25.5251	1.03871e-143	3.17687e-141	VC_0932	-	conserved hypothetical protein	O	CELLULAR PROCESSES AND SIGNALING	Posttranslational modification, protein turnover, chaperones
VC_0936	1697.75	3.46358	0.148092	23.388	5.65534e-121	1.02207e-118	VC_0936	-	putative Capsular polysaccharide synthesis enzyme CpsC, polysaccharide export	M	CELLULAR PROCESSES AND SIGNALING	Cell wall/membrane/envelope biogenesis
VC_0933	5709.71	3.33071	0.136032	24.4848	2.14373e-132	5.32717e-130	VC_0933	-	-	-	-	-
VC_0916	537.521	3.16681	0.13022	24.319	1.23469e-130	2.88772e-128	VC_0916	-	Putative low molecular weight protein-tyrosine-phosphatase	T	CELLULAR PROCESSES AND SIGNALING	Signal transduction mechanisms
VC_0930	178.651	3.12328	0.183929	16.9809	1.13819e-64	9.05086e-63	VC_0930	-	putative Hemolysin-related protein RbmC	S	POORLY CHARACTERIZED	Function unknown
VC_0089	1687.23	3.07433	0.100474	30.5983	1.29071e-205	8.55309e-203	VC_0089	ccp	Cytochrome c551 peroxidase	P	METABOLISM	Inorganic ion transport and metabolism
VC_0920	274.014	3.04018	0.16539	18.3818	1.83674e-75	1.92181e-73	VC_0920	-	putative Exopolysaccharide biosynthesis protein EpsF	M	CELLULAR PROCESSES AND SIGNALING	Cell wall/membrane/envelope biogenesis
VC_A0151	719.373	2.96284	0.117481	25.2196	2.44106e-140	6.47044e-138	VC_A0151	-	putative ferric reductase	P	METABOLISM	Inorganic ion transport and metabolism
VC_0924	1029.78	2.85178	0.106903	26.6762	8.89531e-157	4.42097e-154	VC_0924	-	putative CapK protein	H	METABOLISM	Coenzyme transport and metabolism
VC_2692	17.9822	2.81056	0.519567	5.40942	6.32309e-08	2.26288e-07	VC_2692	cpxR	Transcriptional regulatory protein cpxR	K, T	INFORMATION STORAGE AND PROCESSING, CELLULAR PROCESSES AND SIGNALING	Transcription, Signal transduction mechanisms
VC_1819	279.197	2.69892	0.149176	18.0922	3.66946e-73	3.47375e-71	VC_1819	aldA	Aldehyde dehydrogenase	C	METABOLISM	Energy production and conversion
VC_1854	108.273	2.65386	0.229908	11.5431	7.99668e-31	1.48574e-29	VC_1854	ompT	Outer membrane porin-like protein OmpT	M	CELLULAR PROCESSES AND SIGNALING	Cell wall/membrane/envelope biogenesis
VC_0666	746.523	2.62894	0.111498	23.5783	6.43986e-123	1.28024e-120	VC_0666	-	-	-	-	-
VC_0917	748.284	2.54961	0.17809	14.3164	1.72839e-46	7.63563e-45	VC_0917	wecB	UDP-N-acetylglucosamine 2-epimerase	M	CELLULAR PROCESSES AND SIGNALING	Cell wall/membrane/envelope biogenesis
VC_1262	422.433	2.52395	0.142933	17.6583	8.78576e-70	7.59395e-68	VC_1262	-	-	-	-	-
VC_1235	369.202	2.52326	0.135909	18.5658	6.07899e-77	7.10884e-75	VC_1235	-	putative Na+/H+-dicarboxylate symporter	R	POORLY CHARACTERIZED	General function prediction only
VC_1678	466.6	2.49003	0.130538	19.0751	4.06454e-81	5.05019e-79	VC_1678	pspA	Phage shock protein A	K, T	INFORMATION STORAGE AND PROCESSING, CELLULAR PROCESSES AND SIGNALING	Transcription, Signal transduction mechanisms
VC_0284	191.992	2.4861	0.173263	14.3487	1.08526e-46	4.84832e-45	VC_0284	-	-	P	METABOLISM	Inorganic ion transport and metabolism
VC_1622	87.1723	2.48455	0.237504	10.4611	1.3033e-25	1.74475e-24	VC_1622	-	putative OmpA/MotB protein	M	CELLULAR PROCESSES AND SIGNALING	Cell wall/membrane/envelope biogenesis
VC_1132	372.91	2.45837	0.146097	16.827	1.54692e-63	1.13899e-61	VC_1132	hisG	ATP phosphoribosyltransferase	E	METABOLISM	Amino acid transport and metabolism
VC_0926	811.405	2.42916	0.117569	20.6615	7.69481e-95	1.13313e-92	VC_0926	-	-	-	-	-
VC_0157	512.869	2.42781	0.130793	18.5622	6.49444e-77	7.37768e-75	VC_0157	proA	Alkaline serine exoprotease A	O	CELLULAR PROCESSES AND SIGNALING	Posttranslational modification, protein turnover, chaperones
VC_0938	268.5	2.3968	0.156374	15.3273	5.02251e-53	2.73555e-51	VC_0938	-	conserved hypothetical protein	R	POORLY CHARACTERIZED	General function prediction only
VC_0925	2787.56	2.26481	0.133738	16.9347	2.49449e-64	1.90733e-62	VC_0925	-	putative Glycosyltransferase	M	CELLULAR PROCESSES AND SIGNALING	Cell wall/membrane/envelope biogenesis
VC_0824	513.54	2.2627	0.12983	17.4282	5.04104e-68	4.26451e-66	VC_0824	tpx	Thiol peroxidase	O	CELLULAR PROCESSES AND SIGNALING	Posttranslational modification, protein turnover, chaperones
VC_1331	291.56	2.24343	0.143386	15.6461	3.53144e-55	2.09567e-53	VC_1331	-	-	-	-	-
VC_0927	319.882	2.23085	0.149443	14.9278	2.17331e-50	1.08013e-48	VC_0927	-	putative N-acetylglucosaminyldiphosphoundecaprenol/N-acetyl-beta-D- mannosaminyltransferase	M	CELLULAR PROCESSES AND SIGNALING	Cell wall/membrane/envelope biogenesis
VC_A0159	4216.93	2.21431	0.109568	20.2094	8.09463e-91	1.1098e-88	VC_A0159	-	putative Universal stress protein family 1	T	CELLULAR PROCESSES AND SIGNALING	Signal transduction mechanisms
VC_1191	1511.59	2.1845	0.117539	18.5853	4.22345e-77	5.08861e-75	VC_1191	-	-	-	-	-
VC_A0849	53.6894	2.14449	0.29429	7.28701	3.16911e-13	1.7332e-12	VC_A0849	-	putative T1SS-143 repeat domains protein	Q	METABOLISM	Secondary metabolites biosynthesis, transport and catabolism
VC_0923	156.656	2.14408	0.189781	11.2976	1.3478e-29	2.36073e-28	VC_0923	sat	Serine acetyltransferase	E	METABOLISM	Amino acid transport and metabolism
VC_0786	68.1374	2.11671	0.273756	7.73213	1.05765e-14	6.48951e-14	VC_0786	dadA	D-amino acid dehydrogenase small subunit	E	METABOLISM	Amino acid transport and metabolism
VC_0931	76.6868	2.11573	0.245921	8.60329	7.74611e-18	6.13517e-17	VC_0931	-	putative Lipid A core - O-antigen ligase and related enzyme	M	CELLULAR PROCESSES AND SIGNALING	Cell wall/membrane/envelope biogenesis
VC_0010	214.464	2.11292	0.17347	12.1803	3.9584e-34	8.89187e-33	VC_0010	patH	putative amino acid ABC transporter, periplasmic amino acid-binding portion	E, T	METABOLISM, CELLULAR PROCESSES AND SIGNALING	Amino acid transport and metabolism, Signal transduction mechanisms
VC_A0820	151.295	2.09399	0.188572	11.1045	1.1931e-28	1.92836e-27	VC_A0820	groL	60 kDa chaperonin	O	CELLULAR PROCESSES AND SIGNALING	Posttranslational modification, protein turnover, chaperones
VC_1327	23.4072	2.09361	0.466907	4.48399	7.32595e-06	2.07022e-05	VC_1327	mglA	Galactose/methyl galactoside import ATP-binding protein MglA	G	METABOLISM	Carbohydrate transport and metabolism
VC_0852	1900.96	2.09323	0.142517	14.6876	7.74085e-49	3.6209e-47	VC_0852	recN	DNA repair protein recN	L	INFORMATION STORAGE AND PROCESSING	Replication, recombination and repair
VC_A0945	53.0073	2.09084	0.300704	6.95314	3.57237e-12	1.79114e-11	VC_A0945	malE	Maltose-binding periplasmic protein	G	METABOLISM	Carbohydrate transport and metabolism
VC_A0821	569.155	2.04641	0.121181	16.8873	5.58114e-64	4.18691e-62	VC_A0821	-	-	-	-	-
VC_0038	811.953	2.03866	0.158391	12.871	6.5514e-38	1.98843e-36	VC_0038	-	-	-	-	-
VC_1325	130.972	2.02706	0.226162	8.96284	3.16432e-19	2.74702e-18	VC_1325	mglB	D-galactose-binding periplasmic protein	G	METABOLISM	Carbohydrate transport and metabolism
VC_1579	114.9	2.01177	0.198294	10.1454	3.47419e-24	4.23723e-23	VC_1579	-	putative D-alanine:D-alanyl carrier protein ligase (DltA)	Q	METABOLISM	Secondary metabolites biosynthesis, transport and catabolism
VC_1577	102.728	1.96257	0.212844	9.22071	2.95126e-20	2.79386e-19	VC_1577	-	putative Bacterial lipid A biosynthesis acyltransferase	M	CELLULAR PROCESSES AND SIGNALING	Cell wall/membrane/envelope biogenesis
VC_A0911	7030.1	1.94471	0.0838161	23.202	4.34266e-119	7.50713e-117	VC_A0911	exbB	Biopolymer transport protein exbB1	U	CELLULAR PROCESSES AND SIGNALING	Intracellular trafficking, secretion, and vesicular transport
VC_0534	105.674	1.91505	0.229758	8.33507	7.74528e-17	5.74538e-16	VC_0534	rpoS	RNA polymerase sigma factor rpoS	K	INFORMATION STORAGE AND PROCESSING	Transcription
VC_1249	16.2272	1.88344	0.525557	3.58371	0.000338745	0.000774496	VC_1249	-	putative Glycine cleavage system regulatory protein	E	METABOLISM	Amino acid transport and metabolism
VC_2215	89.6649	1.87821	0.237844	7.89684	2.86067e-15	1.84344e-14	VC_2215	copA	Copper-exporting P-type ATPase A	P	METABOLISM	Inorganic ion transport and metabolism
VC_A0914	21.8691	1.87009	0.437824	4.27133	1.94313e-05	5.22019e-05	VC_A0914	hmuU	Hemin transport system permease protein hmuU	P	METABOLISM	Inorganic ion transport and metabolism
VC_1621	2320.99	1.86495	0.100604	18.5376	1.02701e-76	1.13427e-74	VC_1621	-	putative Type I secretion outer membrane protein, TolC	M, U	CELLULAR PROCESSES AND SIGNALING, CELLULAR PROCESSES AND SIGNALING	Cell wall/membrane/envelope biogenesis, Intracellular trafficking, secretion, and vesicular transport
VC_2761	110.021	1.86329	0.198915	9.36727	7.44301e-21	7.39835e-20	VC_2761	-	putative Drug resistance transporter Bcr/CflA subfamily	E, G, P, R	METABOLISM, METABOLISM, METABOLISM, POORLY CHARACTERIZED	Amino acid transport and metabolism, Carbohydrate transport and metabolism, Inorganic ion transport and metabolism, General function prediction only
VC_A0891	1680.09	1.86232	0.104344	17.8478	3.0056e-71	2.65562e-69	VC_A0891	-	putative iron-regulated membrane protein; Iron-uptake factor PiuB	S	POORLY CHARACTERIZED	Function unknown
VC_A0912	1556.37	1.84964	0.1156	16.0004	1.27044e-57	8.01788e-56	VC_A0912	exbD1	Biopolymer transport protein exbD1	U	CELLULAR PROCESSES AND SIGNALING	Intracellular trafficking, secretion, and vesicular transport
VC_A0249	70.7213	1.83313	0.261374	7.01342	2.32561e-12	1.19004e-11	VC_A0249	-	putative Cytochrome b561	C	METABOLISM	Energy production and conversion
VC_2596	162.773	1.83059	0.174134	10.5125	7.56308e-26	1.02282e-24	VC_2596	rplC	50S ribosomal subunit protein L3	J	INFORMATION STORAGE AND PROCESSING	Translation, ribosomal structure and biogenesis
VC_0913	7786.93	1.81514	0.118197	15.357	3.17993e-53	1.75603e-51	VC_0913	-	putative Secretion protein HlyD	M	CELLULAR PROCESSES AND SIGNALING	Cell wall/membrane/envelope biogenesis
VC_1328	26.8092	1.79634	0.376731	4.76823	1.85851e-06	5.6236e-06	VC_1328	mglC	Galactoside transport system permease protein mglC	G	METABOLISM	Carbohydrate transport and metabolism
VC_A0029	1498.9	1.79598	0.091657	19.5945	1.72122e-85	2.2812e-83	VC_A0029	-	putative Transcriptional regulator	K	INFORMATION STORAGE AND PROCESSING	Transcription
VC_A0158	255.536	1.794	0.143382	12.512	6.41779e-36	1.63571e-34	VC_A0158	-	-	-	-	-
VC_A0808	1144.91	1.786	0.143982	12.4043	2.47521e-35	6.0377e-34	VC_A0808	-	putative MaoC-like dehydratase	I	METABOLISM	Lipid transport and metabolism
VC_A0538	110.167	1.76618	0.202493	8.7222	2.72855e-18	2.2231e-17	VC_A0538	-	putative Cytochrome b561	C	METABOLISM	Energy production and conversion
VC_A0166	5754.13	1.75334	0.124671	14.0637	6.34914e-45	2.65728e-43	VC_A0166	cspG	Cold shock-like protein CspG	K	INFORMATION STORAGE AND PROCESSING	Transcription
VC_A0785	8258.78	1.7493	0.0964226	18.142	1.48455e-73	1.43966e-71	VC_A0785	-	putative c-di-GMP synthetase with GAF and EAL domains	T	CELLULAR PROCESSES AND SIGNALING	Signal transduction mechanisms
VC_2294	435.678	1.74403	0.155372	11.2248	3.0797e-29	5.23285e-28	VC_2294	nqrB	Na(+)-translocating NADH-quinone reductase subunit B	C	METABOLISM	Energy production and conversion
VC_2291	3302.99	1.73651	0.12715	13.6572	1.82928e-42	7.06138e-41	VC_2291	nqrE	Na(+)-translocating NADH-quinone reductase subunit E	C	METABOLISM	Energy production and conversion
VC_2693	239.323	1.72461	0.192532	8.95754	3.31996e-19	2.86337e-18	VC_2693	cpxA	Sensor protein CpxA	T	CELLULAR PROCESSES AND SIGNALING	Signal transduction mechanisms
VC_2581	1714.89	1.69697	0.104678	16.2112	4.20019e-59	2.8305e-57	VC_2581	rplF	50S ribosomal subunit protein L6	J	INFORMATION STORAGE AND PROCESSING	Translation, ribosomal structure and biogenesis
VC_2595	5102.96	1.68327	0.11282	14.92	2.44323e-50	1.19929e-48	VC_2595	rplD	50S ribosomal subunit protein L4	J	INFORMATION STORAGE AND PROCESSING	Translation, ribosomal structure and biogenesis
VC_0766	177.065	1.6669	0.179095	9.30737	1.31037e-20	1.28326e-19	VC_0766	xseA	Exodeoxyribonuclease 7 large subunit	L	INFORMATION STORAGE AND PROCESSING	Replication, recombination and repair
VC_2706	190.71	1.65878	0.173898	9.53882	1.44462e-21	1.50361e-20	VC_2706	-	conserved hypothetical protein	S	POORLY CHARACTERIZED	Function unknown
VC_A0987	155.247	1.65275	0.203384	8.12625	4.42777e-16	3.06704e-15	VC_A0987	ppsA	phosphoenolpyruvate synthase	G	METABOLISM	Carbohydrate transport and metabolism
VC_0947	337.752	1.64492	0.138448	11.8812	1.4828e-32	2.99269e-31	VC_0947	dacA	D-alanyl-D-alanine carboxypeptidase dacA	M	CELLULAR PROCESSES AND SIGNALING	Cell wall/membrane/envelope biogenesis
VC_2085	964.836	1.64233	0.117058	14.0301	1.01997e-44	4.13817e-43	VC_2085	sucC	Succinyl-CoA ligase [ADP-forming] subunit beta	C	METABOLISM	Energy production and conversion
VC_2278	15093.4	1.64158	0.103158	15.9132	5.1286e-57	3.13713e-55	VC_2278	pbuG	Guanine/hypoxanthine permease pbuG	R	POORLY CHARACTERIZED	General function prediction only
VC_A0096	1517.57	1.63717	0.102318	16.0007	1.26254e-57	8.01788e-56	VC_A0096	-	putative Zinc-dependent metalloprotease fused with Proprotein convertase P-domain	O	CELLULAR PROCESSES AND SIGNALING	Posttranslational modification, protein turnover, chaperones
VC_2292	3708.3	1.62584	0.106305	15.294	8.38165e-53	4.44339e-51	VC_2292	nqrD	Na(+)-translocating NADH-quinone reductase subunit D	C	METABOLISM	Energy production and conversion
VC_2293	224.05	1.62569	0.161932	10.0393	1.02377e-23	1.21508e-22	VC_2293	nqrC	Na(+)-translocating NADH-quinone reductase subunit C	C	METABOLISM	Energy production and conversion
VC_1133	500.746	1.60665	0.118178	13.5951	4.28176e-42	1.63695e-40	VC_1133	hisD	Histidinol dehydrogenase	E	METABOLISM	Amino acid transport and metabolism
VC_0921	515.874	1.60473	0.115471	13.8972	6.58703e-44	2.59307e-42	VC_0921	-	putative Membrane protein involved in the export of O-antigen and teichoic acid	R	POORLY CHARACTERIZED	General function prediction only
VC_A0834	2017.87	1.59346	0.170715	9.33405	1.01901e-20	1.00535e-19	VC_A0834	-	putative Cation efflux protein	P	METABOLISM	Inorganic ion transport and metabolism
VC_1871	3171.83	1.5925	0.107552	14.8068	1.32336e-49	6.41669e-48	VC_1871	-	conserved hypothetical protein	S	POORLY CHARACTERIZED	Function unknown
VC_A0136	273.611	1.58732	0.139527	11.3764	5.48045e-30	9.7278e-29	VC_A0136	glpQ	Glycerophosphoryl diester phosphodiesterase	C	METABOLISM	Energy production and conversion
VC_0533	338.129	1.58149	0.130486	12.12	8.2727e-34	1.79739e-32	VC_0533	-	putative lipoprotein NlpD	M	CELLULAR PROCESSES AND SIGNALING	Cell wall/membrane/envelope biogenesis
VC_0570	831.51	1.574	0.118362	13.2982	2.36989e-40	8.41309e-39	VC_0570	rplM	50S ribosomal subunit protein L13	J	INFORMATION STORAGE AND PROCESSING	Translation, ribosomal structure and biogenesis
VC_2597	673.942	1.56865	0.139063	11.2802	1.64447e-29	2.85521e-28	VC_2597	rpsJ	30S ribosomal subunit protein S10	J	INFORMATION STORAGE AND PROCESSING	Translation, ribosomal structure and biogenesis
VC_A0137	943.52	1.54617	0.103554	14.9311	2.06796e-50	1.04079e-48	VC_A0137	glpT	Glycerol-3-phosphate transporter	G	METABOLISM	Carbohydrate transport and metabolism
VC_1116	413.779	1.54606	0.126847	12.1884	3.58529e-34	8.09949e-33	VC_1116	-	-	-	-	-
VC_1161	1612.1	1.53927	0.104503	14.7295	4.16972e-49	1.97367e-47	VC_1161	-	-	-	-	-
VC_0049	93.6105	1.53753	0.231626	6.63798	3.18016e-11	1.4806e-10	VC_0049	smg	Protein smg homolog	S	POORLY CHARACTERIZED	Function unknown
VC_1433	2440	1.5338	0.0924636	16.5881	8.49392e-62	6.14033e-60	VC_1433	uspE	Universal stress protein E	T	CELLULAR PROCESSES AND SIGNALING	Signal transduction mechanisms
VC_0385	177.213	1.5273	0.181178	8.42984	3.4615e-17	2.61652e-16	VC_0385	cysI	Sulfite reductase [NADPH] hemoprotein beta-component	P	METABOLISM	Inorganic ion transport and metabolism
VC_2764	3698.65	1.52463	0.12534	12.1639	4.83951e-34	1.07497e-32	VC_2764	atpD	ATP synthase subunit beta	C	METABOLISM	Energy production and conversion
VC_A0523	2148.18	1.51816	0.116899	12.9869	1.45146e-38	4.6168e-37	VC_A0523	cqsA	CAI-1 autoinducer synthase	H	METABOLISM	Coenzyme transport and metabolism
VC_0384	15.6512	1.51685	0.488885	3.10267	0.00191785	0.00390045	VC_0384	cysJ	Sulfite reductase [NADPH] flavoprotein alpha-component	P	METABOLISM	Inorganic ion transport and metabolism
VC_1454	15.3542	1.51678	0.489272	3.10007	0.00193473	0.00393277	VC_1454	rstA1	RstA phage-related replication protein	L	INFORMATION STORAGE AND PROCESSING	Replication, recombination and repair
VC_1099	620.883	1.51306	0.115602	13.0885	3.82894e-39	1.26865e-37	VC_1099	yfbV	conserved hypothetical protein	S	POORLY CHARACTERIZED	Function unknown
VC_2295	12898.8	1.50151	0.118265	12.6961	6.21496e-37	1.74013e-35	VC_2295	nqrA	Na(+)-translocating NADH-quinone reductase subunit A	C	METABOLISM	Energy production and conversion
VC_A0030	5578.99	1.50023	0.102423	14.6474	1.39958e-48	6.39622e-47	VC_A0030	-	-	-	-	-
VC_2586	524.234	1.49645	0.120129	12.457	1.28035e-35	3.19796e-34	VC_2586	rplN	50S ribosomal subunit protein L14	J	INFORMATION STORAGE AND PROCESSING	Translation, ribosomal structure and biogenesis
VC_1863	146.488	1.48965	0.194088	7.67513	1.65246e-14	9.98507e-14	VC_1863	-	putative Lysine-arginine-ornithine-binding periplasmic protein	E, T	METABOLISM, CELLULAR PROCESSES AND SIGNALING	Amino acid transport and metabolism, Signal transduction mechanisms
VC_1834	3288.59	1.4858	0.0920507	16.1411	1.31192e-58	8.69367e-57	VC_1834	-	putative TPR repeat containing exported protein and a prenylyltransferase domain	S	POORLY CHARACTERIZED	Function unknown
VC_A0915	13532.3	1.47421	0.0984331	14.9767	1.04212e-50	5.31214e-49	VC_A0915	hmuV	Hemin import ATP-binding protein hmuV	P	METABOLISM	Inorganic ion transport and metabolism
VC_0250	563.246	1.46792	0.11948	12.2859	1.0781e-34	2.50673e-33	VC_0250	-	putative iron-containing alcohol dehydrogenase	C	METABOLISM	Energy production and conversion
VC_2765	406.141	1.46403	0.132438	11.0544	2.0874e-28	3.28044e-27	VC_2765	atpG	ATP synthase gamma chain	C	METABOLISM	Energy production and conversion
VC_1118	4781.45	1.46143	0.0855716	17.0784	2.14799e-65	1.74294e-63	VC_1118	-	-	-	-	-
VC_0679	22293.7	1.45949	0.0989909	14.7437	3.37693e-49	1.61767e-47	VC_0679	rpsT	30S ribosomal subunit protein S20	J	INFORMATION STORAGE AND PROCESSING	Translation, ribosomal structure and biogenesis
VC_2582	901.052	1.45572	0.10314	14.114	3.1119e-45	1.34488e-43	VC_2582	rpsH	30S ribosomal subunit protein S8	J	INFORMATION STORAGE AND PROCESSING	Translation, ribosomal structure and biogenesis
VC_0992	928.821	1.44864	0.110001	13.1693	1.31755e-39	4.43948e-38	VC_0992	-	putative Kef-type K+ transport system	P	METABOLISM	Inorganic ion transport and metabolism
VC_1825	587.349	1.44626	0.115256	12.5483	4.06304e-36	1.05586e-34	VC_1825	-	Putative ARAC-type regulatory protein	K	INFORMATION STORAGE AND PROCESSING	Transcription
VC_0592	1008.53	1.4399	0.155617	9.25287	2.1855e-20	2.09386e-19	VC_0592	panB	3-methyl-2-oxobutanoate hydroxymethyltransferase	H	METABOLISM	Coenzyme transport and metabolism
VC_2013	292.886	1.43901	0.174041	8.2682	1.35995e-16	9.92141e-16	VC_2013	ptsG	PTS system glucose-specific EIICB component [Includes: Glucose permease IIC component ; Glucose-specific phosphotransferase enzyme IIB component]	G	METABOLISM	Carbohydrate transport and metabolism
VC_A0333	372.235	1.42682	0.143803	9.92199	3.34018e-23	3.86063e-22	VC_A0333	-	-	-	-	-
VC_0445	437.628	1.42567	0.130049	10.9626	5.78438e-28	8.87981e-27	VC_0445	surA	Chaperone surA	O	CELLULAR PROCESSES AND SIGNALING	Posttranslational modification, protein turnover, chaperones
VC_1913	820.516	1.42384	0.118868	11.9783	4.61628e-33	9.71129e-32	VC_1913	-	hypothetical protein	S	POORLY CHARACTERIZED	Function unknown
VC_1640	310.684	1.41779	0.132031	10.7383	6.72612e-27	9.79599e-26	VC_1640	rplY	50S ribosomal protein L25	J	INFORMATION STORAGE AND PROCESSING	Translation, ribosomal structure and biogenesis
VC_1287	147.047	1.41478	0.177248	7.98194	1.44047e-15	9.62574e-15	VC_1287	-	putative Glucans biosynthesis glucosyltransferase H	M	CELLULAR PROCESSES AND SIGNALING	Cell wall/membrane/envelope biogenesis
VC_A0615	10856.4	1.41301	0.118774	11.8967	1.2319e-32	2.51181e-31	VC_A0615	-	putative Peptide methionine sulfoxide reductase msrA/msrB [Includes: Peptide methionine sulfoxide reductase msrA ; Peptide methionine sulfoxide reductase msrB]	O	CELLULAR PROCESSES AND SIGNALING	Posttranslational modification, protein turnover, chaperones
VC_0520	756.359	1.41281	0.113301	12.4695	1.09463e-35	2.75458e-34	VC_0520	rpsU	30S ribosomal subunit protein S21	J	INFORMATION STORAGE AND PROCESSING	Translation, ribosomal structure and biogenesis
VC_A0845	300.844	1.41055	0.133424	10.5719	4.02168e-26	5.57149e-25	VC_A0845	-	-	-	-	-
VC_0516	628.549	1.40965	0.113989	12.3666	3.9611e-35	9.48756e-34	VC_0516	intA	Prophage CP4-57 integrase	L	INFORMATION STORAGE AND PROCESSING	Replication, recombination and repair
VC_A0540	16665	1.40767	0.106031	13.276	3.18909e-40	1.11226e-38	VC_A0540	-	putative formate transporter FocA fused with CBS domain	P, R	METABOLISM, POORLY CHARACTERIZED	Inorganic ion transport and metabolism, General function prediction only
VC_1835	1588.41	1.40469	0.13458	10.4376	1.67035e-25	2.22118e-24	VC_1835	pal	peptidoglycan-associated lipoprotein	M	CELLULAR PROCESSES AND SIGNALING	Cell wall/membrane/envelope biogenesis
VC_A0840	11474.2	1.40311	0.118404	11.8501	2.14861e-32	4.31458e-31	VC_A0840	-	putative deoxycytidylate deaminase	F	METABOLISM	Nucleotide transport and metabolism
VC_2573	157.508	1.40106	0.187289	7.48073	7.39086e-14	4.24654e-13	VC_2573	rpsK	30S ribosomal subunit protein S11	J	INFORMATION STORAGE AND PROCESSING	Translation, ribosomal structure and biogenesis
VC_0871	319.901	1.39953	0.143878	9.72719	2.30876e-22	2.557e-21	VC_0871	-	conserved hypothetical protein	E	METABOLISM	Amino acid transport and metabolism
VC_2302	182.822	1.39816	0.173581	8.05478	7.96234e-16	5.38406e-15	VC_2302	-	putative RNA polymerase sigma factor	K	INFORMATION STORAGE AND PROCESSING	Transcription
VC_2497	342.093	1.39812	0.145177	9.63048	5.94526e-22	6.35439e-21	VC_2497	-	putative HD-GYP domain protein	T	CELLULAR PROCESSES AND SIGNALING	Signal transduction mechanisms
VC_1119	442.514	1.39775	0.126123	11.0824	1.52768e-28	2.44921e-27	VC_1119	-	putative Short-chain dehydrogenase/reductase SDR	I, Q, R	METABOLISM, METABOLISM, POORLY CHARACTERIZED	Lipid transport and metabolism, Secondary metabolites biosynthesis, transport and catabolism, General function prediction only
VC_2766	39747.8	1.39295	0.101957	13.6621	1.70874e-42	6.66073e-41	VC_2766	atpA	ATP synthase subunit alpha	C	METABOLISM	Energy production and conversion
VC_0362	156.329	1.39031	0.169729	8.19134	2.58343e-16	1.85235e-15	VC_0362	tufA	Elongation factor Tu 1	J	INFORMATION STORAGE AND PROCESSING	Translation, ribosomal structure and biogenesis
VC_2572	1016.14	1.3886	0.108117	12.8435	9.3544e-38	2.72408e-36	VC_2572	rpsD	30S ribosomal subunit protein S4	J	INFORMATION STORAGE AND PROCESSING	Translation, ribosomal structure and biogenesis
VC_0663	9968.8	1.38831	0.0907603	15.2964	8.07859e-53	4.3406e-51	VC_0663	-	-	-	-	-
VC_0326	4997.19	1.3842	0.0943781	14.6665	1.05583e-48	4.88137e-47	VC_0326	rplJ	50S ribosomal protein L10	J	INFORMATION STORAGE AND PROCESSING	Translation, ribosomal structure and biogenesis
VC_1333	3124.41	1.37389	0.09784	14.0422	8.5968e-45	3.56051e-43	VC_1333	-	-	-	-	-
VC_2084	292.729	1.37215	0.141757	9.67961	3.68102e-22	3.99884e-21	VC_2084	sucD	Succinyl-CoA ligase [ADP-forming] subunit alpha	C	METABOLISM	Energy production and conversion
VC_0076	2976.27	1.36902	0.150542	9.09395	9.55025e-20	8.62996e-19	VC_0076	uspA	universal stress protein A	T	CELLULAR PROCESSES AND SIGNALING	Signal transduction mechanisms
VC_A0700	1526.24	1.36466	0.104524	13.056	5.87594e-39	1.89941e-37	VC_A0700	endo I	Chitodextrinase	G, R	METABOLISM, POORLY CHARACTERIZED	Carbohydrate transport and metabolism, General function prediction only
VC_2333	421.598	1.36384	0.139383	9.78489	1.30736e-22	1.47672e-21	VC_2333	-	putative ribosomal protein S6 glutaminyl transferase related protein	H, J	METABOLISM, INFORMATION STORAGE AND PROCESSING	Coenzyme transport and metabolism, Translation, ribosomal structure and biogenesis
VC_2576	2429.48	1.36302	0.150568	9.05255	1.39667e-19	1.24232e-18	VC_2576	secY	Preprotein translocase subunit secY	U	CELLULAR PROCESSES AND SIGNALING	Intracellular trafficking, secretion, and vesicular transport
VC_1463	4399.47	1.36222	0.103216	13.1978	9.03187e-40	3.09575e-38	VC_1463	rstA2	RstA phage-related replication protein	L	INFORMATION STORAGE AND PROCESSING	Replication, recombination and repair
VC_1183	972.97	1.35625	0.107902	12.5693	3.11605e-36	8.15094e-35	VC_1183	-	conserved hypothetical protein	S	POORLY CHARACTERIZED	Function unknown
VC_A0738	2472.65	1.35496	0.138431	9.78795	1.26847e-22	1.43687e-21	VC_A0738	-	-	-	-	-
VC_0411	25.5992	1.35485	0.415391	3.26162	0.00110777	0.00234407	VC_0411	-	conserved hypothetical protein	N, U	CELLULAR PROCESSES AND SIGNALING, CELLULAR PROCESSES AND SIGNALING	Cell motility, Intracellular trafficking, secretion, and vesicular transport
VC_1334	59.7713	1.35149	0.275512	4.90539	9.32417e-07	2.93066e-06	VC_1334	-	Putative tricarboxylic transport TctC	S	POORLY CHARACTERIZED	Function unknown
VC_0426	2883.47	1.34939	0.140399	9.61107	7.18008e-22	7.59255e-21	VC_0426	-	conserved hypothetical protein	S	POORLY CHARACTERIZED	Function unknown
VC_0922	804.757	1.3486	0.103874	12.983	1.52843e-38	4.82303e-37	VC_0922	-	-	-	-	-
VC_1914	5643.77	1.34729	0.153727	8.7642	1.88114e-18	1.55497e-17	VC_1914	ihfB	Integration host factor subunit beta	L	INFORMATION STORAGE AND PROCESSING	Replication, recombination and repair
VC_A0637	87.2522	1.34558	0.221992	6.06138	1.34955e-09	5.54319e-09	VC_A0637	nfnB	Oxygen-insensitive NAD(P)H nitroreductase	C	METABOLISM	Energy production and conversion
VC_A0567	60.8068	1.34069	0.257525	5.20608	1.92875e-07	6.54885e-07	VC_A0567	-	-	-	-	-
VC_1862	28.282	1.33955	0.364572	3.67431	0.000238491	0.000558446	VC_1862	hisQ	Histidine transport system permease protein hisQ	E	METABOLISM	Amino acid transport and metabolism
VC_2594	15068.6	1.33938	0.089317	14.9958	7.81897e-51	4.03743e-49	VC_2594	rplW	50S ribosomal subunit protein L23	J	INFORMATION STORAGE AND PROCESSING	Translation, ribosomal structure and biogenesis
VC_0802	601.121	1.33864	0.144012	9.29535	1.46718e-20	1.42978e-19	VC_0802	-	conserved hypothetical protein	S	POORLY CHARACTERIZED	Function unknown
VC_1318	186.843	1.33773	0.1664	8.03922	9.04089e-16	6.09264e-15	VC_1318	ompV	Outer membrane protein ompV	M	CELLULAR PROCESSES AND SIGNALING	Cell wall/membrane/envelope biogenesis
VC_0519	118.545	1.33241	0.238512	5.58634	2.31901e-08	8.62523e-08	VC_0519	-	conserved hypothetical protein with GatB/Yqey domain	S	POORLY CHARACTERIZED	Function unknown
VC_1964	5488.98	1.32567	0.127242	10.4186	2.04029e-25	2.70406e-24	VC_1964	-	putative translocase, subunit Tim44	S	POORLY CHARACTERIZED	Function unknown
VC_1112	2799.94	1.31879	0.132625	9.94376	2.68498e-23	3.12149e-22	VC_1112	bioB	biotin synthase	H	METABOLISM	Coenzyme transport and metabolism
VC_A0843	195.331	1.31509	0.160664	8.18537	2.71473e-16	1.94133e-15	VC_A0843	-	putative glyceraldehyde-3-phosphate dehydrogenase	G	METABOLISM	Carbohydrate transport and metabolism
VC_1523	1233.01	1.30995	0.128804	10.1701	2.6956e-24	3.34929e-23	VC_1523	tupA	Extracellular tungstate binding protein	H	METABOLISM	Coenzyme transport and metabolism
VC_0490	8085.42	1.3099	0.127839	10.2464	1.22796e-24	1.55489e-23	VC_0490	-	putative ATPase involved in DNA repair/ Chromosome segregation	D, L	CELLULAR PROCESSES AND SIGNALING, INFORMATION STORAGE AND PROCESSING	Cell cycle control, cell division, chromosome partitioning, Replication, recombination and repair
VC_1143	12757.4	1.30898	0.111617	11.7275	9.21752e-32	1.80536e-30	VC_1143	clpS	ATP-dependent Clp protease adapter protein clpS	S	POORLY CHARACTERIZED	Function unknown
VC_0134	581.291	1.30679	0.166069	7.86899	3.57528e-15	2.2891e-14	VC_0134	-	putative Cof protein, HD superfamily hydrolase	R	POORLY CHARACTERIZED	General function prediction only
VC_0324	65.518	1.30675	0.244954	5.33468	9.57139e-08	3.3648e-07	VC_0324	rplK	50S ribosomal protein L11	J	INFORMATION STORAGE AND PROCESSING	Translation, ribosomal structure and biogenesis
VC_1677	1593.39	1.3039	0.114028	11.4349	2.7983e-30	5.12721e-29	VC_1677	-	-	-	-	-
VC_2583	391.346	1.3015	0.138399	9.40397	5.25419e-21	5.30219e-20	VC_2583	rpsN	30S ribosomal subunit protein S14	J	INFORMATION STORAGE AND PROCESSING	Translation, ribosomal structure and biogenesis
VC_0760	3905.51	1.29131	0.106332	12.1441	6.16803e-34	1.35492e-32	VC_0760	hisS	histidyl tRNA synthetase	J	INFORMATION STORAGE AND PROCESSING	Translation, ribosomal structure and biogenesis
VC_A0172	2866.83	1.28931	0.104719	12.3121	7.79796e-35	1.8346e-33	VC_A0172	-	putative BatA (Bacteroides aerotolerance operon) protein	R	POORLY CHARACTERIZED	General function prediction only
VC_0704	1343.7	1.28293	0.109915	11.6721	1.7708e-31	3.43448e-30	VC_0704	nspS	Norspermidine sensor	E	METABOLISM	Amino acid transport and metabolism
VC_A0225	856.484	1.28185	0.161712	7.92674	2.24973e-15	1.4712e-14	VC_A0225	-	putative glutamine amidotransferase	R	POORLY CHARACTERIZED	General function prediction only
VC_A0184	9981.54	1.2796	0.0908399	14.0863	4.61191e-45	1.95074e-43	VC_A0184	capB	Cold shock protein CapB	K	INFORMATION STORAGE AND PROCESSING	Transcription
VC_0391	33.2055	1.27921	0.364194	3.51244	0.00044401	0.00100135	VC_0391	lysC	aspartate kinase III	E	METABOLISM	Amino acid transport and metabolism
VC_0218	788.839	1.27425	0.111521	11.4261	3.09772e-30	5.62399e-29	VC_0218	rpmB	50S ribosomal protein L28	J	INFORMATION STORAGE AND PROCESSING	Translation, ribosomal structure and biogenesis
VC_2580	48.9377	1.2696	0.302617	4.1954	2.72391e-05	7.20097e-05	VC_2580	rplR	50S ribosomal subunit protein L18	J	INFORMATION STORAGE AND PROCESSING	Translation, ribosomal structure and biogenesis
VC_1777	526.713	1.26744	0.114617	11.058	2.0045e-28	3.16265e-27	VC_1777	-	putative TRAP-type transport system, large permease component, N-acetylneuraminate transporter	G	METABOLISM	Carbohydrate transport and metabolism
VC_A0270	2523.09	1.26739	0.156528	8.09686	5.63951e-16	3.85933e-15	VC_A0270	dacC	D-alanyl-D-alanine carboxypeptidase	M	CELLULAR PROCESSES AND SIGNALING	Cell wall/membrane/envelope biogenesis
VC_0092	11751	1.26737	0.0943076	13.4387	3.58629e-41	1.33263e-39	VC_0092	lexA	LexA repressor	K, T	INFORMATION STORAGE AND PROCESSING, CELLULAR PROCESSES AND SIGNALING	Transcription, Signal transduction mechanisms
VC_1358	125.003	1.26612	0.190823	6.63504	3.2442e-11	1.50689e-10	VC_1358	yccA	Modulator of FtsH protease YccA	R	POORLY CHARACTERIZED	General function prediction only
VC_2574	913.962	1.26201	0.136034	9.27717	1.74039e-20	1.68775e-19	VC_2574	rpsM	30S ribosomal subunit protein S13	J	INFORMATION STORAGE AND PROCESSING	Translation, ribosomal structure and biogenesis
VC_A0076	1467.17	1.2541	0.134306	9.33766	9.84877e-21	9.74098e-20	VC_A0076	-	putative Nucleoside/arginine uptake transporter	S	POORLY CHARACTERIZED	Function unknown
VC_1634	1345.28	1.253	0.119743	10.464	1.26367e-25	1.69741e-24	VC_1634	bcr	Bicyclomycin resistance protein	E, G, P, R	METABOLISM, METABOLISM, METABOLISM, POORLY CHARACTERIZED	Amino acid transport and metabolism, Carbohydrate transport and metabolism, Inorganic ion transport and metabolism, General function prediction only
VC_A0539	774.989	1.25261	0.113186	11.0669	1.81671e-28	2.9009e-27	VC_A0539	-	putative YceI-like domain protein	S	POORLY CHARACTERIZED	Function unknown
VC_A0828	89.991	1.24903	0.244161	5.11561	3.12734e-07	1.03275e-06	VC_A0828	phhA	Phenylalanine-4-hydroxylase	E	METABOLISM	Amino acid transport and metabolism
VC_0968	141.298	1.23475	0.181278	6.81139	9.66603e-12	4.68685e-11	VC_0968	cysK	cysteine synthase A	E	METABOLISM	Amino acid transport and metabolism
VC_A0291	1187.54	1.23364	0.11937	10.3346	4.91702e-25	6.38891e-24	VC_A0291	intIA	Site-specific recombinase IntIA	L	INFORMATION STORAGE AND PROCESSING	Replication, recombination and repair
VC_A0232	66347.9	1.22808	0.119779	10.2529	1.14867e-24	1.45914e-23	VC_A0232	vctA	fragment of Enterobactin receptor (part 2)	P	METABOLISM	Inorganic ion transport and metabolism
VC_2768	1297.11	1.22313	0.114894	10.6457	1.8253e-26	2.59192e-25	VC_2768	atpF	ATP synthase subunit b	C	METABOLISM	Energy production and conversion
VC_2490	1753.53	1.22313	0.096343	12.6956	6.25853e-37	1.74013e-35	VC_2490	leuA	2-isopropylmalate synthase	E	METABOLISM	Amino acid transport and metabolism
VC_0703	8504.49	1.22077	0.134133	9.1012	8.93403e-20	8.09151e-19	VC_0703	mbaA	Biofilm architecture maintenance protein mbaA	T	CELLULAR PROCESSES AND SIGNALING	Signal transduction mechanisms
VC_2767	3383.81	1.21958	0.0942788	12.9359	2.82267e-38	8.76793e-37	VC_2767	atpH	ATP synthase subunit delta	C	METABOLISM	Energy production and conversion
VC_0957	7350.21	1.21217	0.0976432	12.4143	2.18532e-35	5.39678e-34	VC_0957	-	-	-	-	-
VC_0759	511.447	1.20069	0.132542	9.05893	1.31742e-19	1.17446e-18	VC_0759	ispG	4-hydroxy-3-methylbut-2-en-1-yl diphosphate synthase	I	METABOLISM	Lipid transport and metabolism
VC_1101	698.48	1.19994	0.107487	11.1635	6.15117e-29	1.01062e-27	VC_1101	-	putative ABC-type transport system, periplasmic component	R	POORLY CHARACTERIZED	General function prediction only
VC_2584	203.038	1.19452	0.165478	7.21859	5.25304e-13	2.82626e-12	VC_2584	rplE	50S ribosomal subunit protein L5	J	INFORMATION STORAGE AND PROCESSING	Translation, ribosomal structure and biogenesis
VC_0327	386.808	1.19319	0.140814	8.47353	2.38057e-17	1.81673e-16	VC_0327	rplL	50S ribosomal protein L7/L12	J	INFORMATION STORAGE AND PROCESSING	Translation, ribosomal structure and biogenesis
VC_2290	15083.7	1.19111	0.094001	12.6713	8.53384e-37	2.34004e-35	VC_2290	nqrF	Na(+)-translocating NADH-quinone reductase subunit F	C	METABOLISM	Energy production and conversion
VC_1149	8366.34	1.18792	0.143322	8.28848	1.14702e-16	8.42983e-16	VC_1149	-	putative decarboxylase	E	METABOLISM	Amino acid transport and metabolism
VC_1464	9438.76	1.18624	0.0977736	12.1325	7.10315e-34	1.55176e-32	VC_1464	rstR2	Cryptic phage CTXphi transcriptional repressor rstR	K	INFORMATION STORAGE AND PROCESSING	Transcription
VC_2579	613.216	1.18345	0.124258	9.52416	1.66384e-21	1.72277e-20	VC_2579	rpsE	30S ribosomal subunit protein S5	J	INFORMATION STORAGE AND PROCESSING	Translation, ribosomal structure and biogenesis
VC_0715	206.491	1.18323	0.168417	7.02558	2.13173e-12	1.09506e-11	VC_0715	frp	NADPH-flavin oxidoreductase	C	METABOLISM	Energy production and conversion
VC_1451	390.82	1.18125	0.142584	8.28458	1.18529e-16	8.69507e-16	VC_1451	rtxA	RTX toxin RtxA	D, Q, R, U, W	CELLULAR PROCESSES AND SIGNALING, METABOLISM, POORLY CHARACTERIZED, CELLULAR PROCESSES AND SIGNALING, CELLULAR PROCESSES AND SIGNALING	Cell cycle control, cell division, chromosome partitioning, Secondary metabolites biosynthesis, transport and catabolism, General function prediction only, Intracellular trafficking, secretion, and vesicular transport, Extracellular structures
VC_1892	741.248	1.18113	0.127645	9.25324	2.17784e-20	2.09157e-19	VC_1892	-	putative esterase	R	POORLY CHARACTERIZED	General function prediction only
VC_r002	1470.64	1.17794	0.0994557	11.8439	2.31482e-32	4.60186e-31	VC_r002	-	-	-	-	-
VC_0571	414.982	1.17431	0.124902	9.40187	5.36036e-21	5.38202e-20	VC_0571	rpsI	30S ribosomal subunit protein S9	J	INFORMATION STORAGE AND PROCESSING	Translation, ribosomal structure and biogenesis
VC_1332	8805.09	1.17383	0.115208	10.1888	2.22559e-24	2.78269e-23	VC_1332	-	putative Tricarboxylate transport membrane protein TctA	S	POORLY CHARACTERIZED	Function unknown
VC_1317	505.167	1.17245	0.153831	7.62167	2.50415e-14	1.48383e-13	VC_1317	-	putative VirK protein	S	POORLY CHARACTERIZED	Function unknown
VC_2645	15433.3	1.1718	0.111381	10.5206	6.94189e-26	9.45239e-25	VC_2645	argE	acetylornithine deacetylase	E	METABOLISM	Amino acid transport and metabolism
VC_0325	907.905	1.1659	0.104287	11.1798	5.12243e-29	8.48616e-28	VC_0325	rplA	50S ribosomal protein L1	J	INFORMATION STORAGE AND PROCESSING	Translation, ribosomal structure and biogenesis
VC_A1028	491.826	1.16546	0.126238	9.23222	2.65079e-20	2.52747e-19	VC_A1028	lamB	Maltoporin	G	METABOLISM	Carbohydrate transport and metabolism
VC_0487	484.728	1.16173	0.12744	9.11587	7.80415e-20	7.13317e-19	VC_0487	glmS	Glucosamine--fructose-6-phosphate aminotransferase [isomerizing]	M	CELLULAR PROCESSES AND SIGNALING	Cell wall/membrane/envelope biogenesis
VC_1779	22904.3	1.16162	0.101849	11.4053	3.93392e-30	7.0775e-29	VC_1779	-	putative TRAP-type transport system, periplasmic component, N-acetylneuraminate-binding protein	G	METABOLISM	Carbohydrate transport and metabolism
VC_0869	336.963	1.1583	0.167358	6.92107	4.48232e-12	2.2305e-11	VC_0869	purL	Phosphoribosylformylglycinamidine synthase	F	METABOLISM	Nucleotide transport and metabolism
VC_2593	3687.84	1.15616	0.0966265	11.9653	5.40148e-33	1.11856e-31	VC_2593	rplB	50S ribosomal subunit protein L2	J	INFORMATION STORAGE AND PROCESSING	Translation, ribosomal structure and biogenesis
VC_A0744	662.681	1.15347	0.125814	9.16803	4.81734e-20	4.49618e-19	VC_A0744	glpK	Glycerol kinase	C	METABOLISM	Energy production and conversion
VC_0761	9360.89	1.1527	0.0880957	13.0846	4.03099e-39	1.32456e-37	VC_0761	-	putative TPR repeat protein	S	POORLY CHARACTERIZED	Function unknown
VC_1113	10447	1.15253	0.0983402	11.7198	1.00937e-31	1.96728e-30	VC_1113	bioF	8-amino-7-oxononanoate synthase	H	METABOLISM	Coenzyme transport and metabolism
VC_0361	387.372	1.15175	0.124193	9.27389	1.79484e-20	1.73633e-19	VC_0361	fusA	Elongation factor G	J	INFORMATION STORAGE AND PROCESSING	Translation, ribosomal structure and biogenesis
VC_r011	10242.7	1.15161	0.118813	9.69262	3.24103e-22	3.54996e-21	VC_r011	-	-	-	-	-
VC_A0170	33028.3	1.15153	0.0913772	12.602	2.05902e-36	5.4944e-35	VC_A0170	-	-	-	-	-
VC_0198	68629.1	1.15124	0.0901366	12.7722	2.34437e-37	6.65802e-36	VC_0198	-	-	-	-	-
VC_A0175	2255	1.15028	0.109016	10.5515	4.99978e-26	6.87859e-25	VC_A0175	-	putative MoxR-like ATPase	R	POORLY CHARACTERIZED	General function prediction only
VC_0482	115.191	1.14955	0.242199	4.74632	2.07148e-06	6.22621e-06	VC_0482	iciA	Chromosome initiation inhibitor	K	INFORMATION STORAGE AND PROCESSING	Transcription
VC_r014	12786.8	1.14902	0.0937801	12.2523	1.63309e-34	3.75328e-33	VC_r014	-	-	-	-	-
VC_0899	12677.9	1.14869	0.089403	12.8484	8.7758e-38	2.60393e-36	VC_0899	-	Putative lysine decarboxylase	R	POORLY CHARACTERIZED	General function prediction only
VC_0235	860.112	1.14454	0.16428	6.96703	3.23707e-12	1.63332e-11	VC_0235	-	putative ADP-heptose:LPS heptosyltransferase	M	CELLULAR PROCESSES AND SIGNALING	Cell wall/membrane/envelope biogenesis
VC_2485	6501.29	1.14384	0.124695	9.17315	4.59384e-20	4.29767e-19	VC_2485	leuO	HTH-type transcriptional regulator LeuO	K	INFORMATION STORAGE AND PROCESSING	Transcription
VC_2250	634.121	1.14346	0.121281	9.42819	4.17229e-21	4.24272e-20	VC_2250	lpxD	UDP-3-O-[3-hydroxymyristoyl] glucosamine N-acyltransferase	M	CELLULAR PROCESSES AND SIGNALING	Cell wall/membrane/envelope biogenesis
VC_2599	1913.99	1.1418	0.102971	11.0885	1.42641e-28	2.29612e-27	VC_2599	rnr	Ribonuclease R	K	INFORMATION STORAGE AND PROCESSING	Transcription
VC_1527	833.01	1.14173	0.113386	10.0694	7.53987e-24	9.02968e-23	VC_1527	-	putative Bifunctional molybdenum cofactor biosynthesis MobB/MoeA	H	METABOLISM	Coenzyme transport and metabolism
VC_2585	1622.86	1.13886	0.118855	9.58198	9.5204e-22	1.00141e-20	VC_2585	rplX	50S ribosomal subunit protein L24	J	INFORMATION STORAGE AND PROCESSING	Translation, ribosomal structure and biogenesis
VC_1817	5623.21	1.13608	0.107167	10.601	2.94755e-26	4.15583e-25	VC_1817	-	putative Sigma-54 dependent transcriptional regulator	K, Q	INFORMATION STORAGE AND PROCESSING, METABOLISM	Transcription, Secondary metabolites biosynthesis, transport and catabolism
VC_A0083	743.034	1.13593	0.117558	9.6627	4.34269e-22	4.69199e-21	VC_A0083	-	putative Multidrug resistance protein D	E, G, P, R	METABOLISM, METABOLISM, METABOLISM, POORLY CHARACTERIZED	Amino acid transport and metabolism, Carbohydrate transport and metabolism, Inorganic ion transport and metabolism, General function prediction only
VC_r008	2625.54	1.13445	0.0852005	13.3151	1.89221e-40	6.77786e-39	VC_r008	-	-	-	-	-
VC_0006	3196.66	1.13269	0.112162	10.0987	5.59612e-24	6.76297e-23	VC_0006	rnpA	Ribonuclease P protein component	J	INFORMATION STORAGE AND PROCESSING	Translation, ribosomal structure and biogenesis
VC_A0098	760.241	1.13205	0.104636	10.8189	2.79972e-27	4.16917e-26	VC_A0098	-	putative Nicotinate phosphoribosyltransferase	H	METABOLISM	Coenzyme transport and metabolism
VC_2406	340.485	1.1318	0.15473	7.31469	2.57979e-13	1.41675e-12	VC_2406	murE	UDP-N-acetylmuramoyl-L-alanyl-D-glutamate--2,6-diaminopimelate ligase	M	CELLULAR PROCESSES AND SIGNALING	Cell wall/membrane/envelope biogenesis
VC_2770	10400.3	1.13072	0.091758	12.3229	6.82194e-35	1.62419e-33	VC_2770	atpB	ATP synthase subunit a	C	METABOLISM	Energy production and conversion
VC_0795	7940.27	1.12906	0.110315	10.2349	1.38333e-24	1.74606e-23	VC_0795	citS	Citrate-sodium symporter	C	METABOLISM	Energy production and conversion
VC_A0658	135.695	1.12767	0.211732	5.32593	1.00437e-07	3.51222e-07	VC_A0658	-	putative Methyl-accepting chemotaxis protein with PAS domain	N, T	CELLULAR PROCESSES AND SIGNALING, CELLULAR PROCESSES AND SIGNALING	Cell motility, Signal transduction mechanisms
VC_A0171	52998.9	1.12721	0.113835	9.90214	4.07481e-23	4.69607e-22	VC_A0171	-	putative von Willebrand factor type A domain fused with Tetratricopeptide repeat domain protein	R	POORLY CHARACTERIZED	General function prediction only
VC_2532	745.318	1.12373	0.119288	9.42034	4.49627e-21	4.5605e-20	VC_2532	-	putative P-loop-containing kinase	R	POORLY CHARACTERIZED	General function prediction only
VC_2644	1960.37	1.12334	0.0919846	12.2123	2.673e-34	6.07306e-33	VC_2644	argC	N-acetyl-gamma-glutamyl-phosphate reductase	E	METABOLISM	Amino acid transport and metabolism
VC_r005	438.799	1.12283	0.125265	8.96363	3.14164e-19	2.73329e-18	VC_r005	-	-	-	-	-
VC_1910	7914.79	1.11974	0.102772	10.8954	1.21237e-27	1.8259e-26	VC_1910	miaE	tRNA-(ms[2]io[6]A)-hydroxylase	F, J	METABOLISM, INFORMATION STORAGE AND PROCESSING	Nucleotide transport and metabolism, Translation, ribosomal structure and biogenesis
VC_0837	3229.18	1.11856	0.101754	10.9928	4.13878e-28	6.37821e-27	VC_0837	-	-	-	-	-
VC_2714	43658	1.11699	0.0873241	12.7913	1.83393e-37	5.24583e-36	VC_2714	ompR	Transcriptional regulatory protein ompR	K, T	INFORMATION STORAGE AND PROCESSING, CELLULAR PROCESSES AND SIGNALING	Transcription, Signal transduction mechanisms
VC_2636	97.956	1.11578	0.216435	5.15525	2.53296e-07	8.42766e-07	VC_2636	oxyR	Hydrogen peroxide-inducible genes activator	K	INFORMATION STORAGE AND PROCESSING	Transcription
VC_2565	4227.38	1.11302	0.111343	9.99634	1.58136e-23	1.8602e-22	VC_2565	elaA	Protein elaA	R	POORLY CHARACTERIZED	General function prediction only
VC_A0657	128.691	1.11175	0.219466	5.06568	4.06944e-07	1.32083e-06	VC_A0657	glpD	Aerobic glycerol-3-phosphate dehydrogenase	C	METABOLISM	Energy production and conversion
VC_1265	11284.3	1.11154	0.0830242	13.3882	7.09225e-41	2.58704e-39	VC_1265	-	putative thiol oxidoreductase	C	METABOLISM	Energy production and conversion
VC_1053	316.461	1.11079	0.151799	7.31748	2.52677e-13	1.3934e-12	VC_1053	apt	adenine phosphoribosyltransferase	F	METABOLISM	Nucleotide transport and metabolism
VC_A0919	259.352	1.10796	0.13901	7.97035	1.58226e-15	1.05026e-14	VC_A0919	-	conserved hypothetical protein	S	POORLY CHARACTERIZED	Function unknown
VC_1134	693.123	1.10771	0.114303	9.69103	3.29203e-22	3.59591e-21	VC_1134	hisC	histidinol-phosphate aminotransferase	E	METABOLISM	Amino acid transport and metabolism
VC_1103	94.876	1.10564	0.218554	5.05888	4.21725e-07	1.36545e-06	VC_1103	-	putative ABC-type transport system, ATPase component	R	POORLY CHARACTERIZED	General function prediction only
VC_1224	180.754	1.10532	0.163875	6.7449	1.53129e-11	7.33544e-11	VC_1224	-	conserved hypothetical protein	S	POORLY CHARACTERIZED	Function unknown
VC_2592	423.255	1.10511	0.130678	8.45671	2.7503e-17	2.08687e-16	VC_2592	rpsS	30S ribosomal subunit protein S19	J	INFORMATION STORAGE AND PROCESSING	Translation, ribosomal structure and biogenesis
VC_A0782	145.643	1.10496	0.192787	5.73151	9.95399e-09	3.80549e-08	VC_A0782	-	putative ABC-type dipeptide/oligopeptide/nickel transport system, ATPase component	Q	METABOLISM	Secondary metabolites biosynthesis, transport and catabolism
VC_2507	72.0472	1.10209	0.230994	4.77106	1.83262e-06	5.55797e-06	VC_2507	-	putative ATPase	T	CELLULAR PROCESSES AND SIGNALING	Signal transduction mechanisms
VC_A0944	578.904	1.10012	0.113895	9.65906	4.49968e-22	4.84843e-21	VC_A0944	malF	Maltose transport system permease protein malF	G	METABOLISM	Carbohydrate transport and metabolism
VC_1181	112.223	1.09924	0.191986	5.72561	1.03065e-08	3.93648e-08	VC_1181	cydD	ATP-binding/permease protein cydD	C, O	METABOLISM, CELLULAR PROCESSES AND SIGNALING	Energy production and conversion, Posttranslational modification, protein turnover, chaperones
VC_1534	205.847	1.09908	0.156178	7.03733	1.95955e-12	1.00922e-11	VC_1534	-	putative Sterol desaturase	I	METABOLISM	Lipid transport and metabolism
VC_0639	4347.53	1.09714	0.134646	8.14832	3.69029e-16	2.57866e-15	VC_0639	glmM	phosphoglucosamine mutase	G	METABOLISM	Carbohydrate transport and metabolism
VC_2578	2790.24	1.09624	0.0889688	12.3216	6.92804e-35	1.63964e-33	VC_2578	rpmD	50S ribosomal subunit protein L30	J	INFORMATION STORAGE AND PROCESSING	Translation, ribosomal structure and biogenesis
VC_0435	357.001	1.0961	0.13589	8.06605	7.26112e-16	4.93508e-15	VC_0435	rplU	50S ribosomal subunit protein L21	J	INFORMATION STORAGE AND PROCESSING	Translation, ribosomal structure and biogenesis
VC_A0683	11429.3	1.09569	0.0948842	11.5477	7.58588e-31	1.42271e-29	VC_A0683	-	putative Sensor histidine protein kinase UhpB, glucose-6-phosphate specific	T	CELLULAR PROCESSES AND SIGNALING	Signal transduction mechanisms
VC_1859	2179.25	1.0939	0.0866303	12.6273	1.49355e-36	4.01241e-35	VC_1859	-	putative Methyl-accepting chemotaxis protein	N, T	CELLULAR PROCESSES AND SIGNALING, CELLULAR PROCESSES AND SIGNALING	Cell motility, Signal transduction mechanisms
VC_A0795	11940.1	1.09204	0.0828499	13.181	1.12888e-39	3.83628e-38	VC_A0795	-	putative Site-specific recombinase, DNA invertase Pin homolog	L	INFORMATION STORAGE AND PROCESSING	Replication, recombination and repair
VC_1248	184.852	1.09099	0.164919	6.61531	3.70767e-11	1.71216e-10	VC_1248	-	putative Methyl-accepting chemotaxis protein	N, T	CELLULAR PROCESSES AND SIGNALING, CELLULAR PROCESSES AND SIGNALING	Cell motility, Signal transduction mechanisms
VC_1384	8883.98	1.09036	0.0847819	12.8608	7.48383e-38	2.25422e-36	VC_1384	-	-	-	-	-
VC_A0469	261.728	1.09	0.146398	7.44545	9.66157e-14	5.48777e-13	VC_A0469	higA2	plasmid stabilization system HigA protein (antitoxin of TA system HigB-HigA)	K	INFORMATION STORAGE AND PROCESSING	Transcription
VC_2187	211.408	1.08976	0.15691	6.94513	3.781e-12	1.88623e-11	VC_2187	flaD	Polar flagellin B/D	N	CELLULAR PROCESSES AND SIGNALING	Cell motility
VC_2258	18847.3	1.08863	0.085376	12.751	3.07697e-37	8.67663e-36	VC_2258	pyrH	uridylate kinase	F	METABOLISM	Nucleotide transport and metabolism
VC_0853	108.486	1.08535	0.201358	5.39016	7.03956e-08	2.5125e-07	VC_0853	ppnK	NAD kinase	G	METABOLISM	Carbohydrate transport and metabolism
VC_2588	271.446	1.08529	0.154831	7.00951	2.39148e-12	1.2206e-11	VC_2588	rpmC	50S ribosomal subunit protein L29	J	INFORMATION STORAGE AND PROCESSING	Translation, ribosomal structure and biogenesis
VC_2577	24.1575	1.08419	0.383016	2.83067	0.00464506	0.0089135	VC_2577	rplO	50S ribosomal subunit protein L15	J	INFORMATION STORAGE AND PROCESSING	Translation, ribosomal structure and biogenesis
VC_0664	13212.1	1.0821	0.102086	10.5999	2.98154e-26	4.1889e-25	VC_0664	lysS	Lysyl-tRNA synthetase	J	INFORMATION STORAGE AND PROCESSING	Translation, ribosomal structure and biogenesis
VC_A0498	15987.1	1.08082	0.0971619	11.1239	9.60297e-29	1.55842e-27	VC_A0498	-	conserved hypothetical protein	K	INFORMATION STORAGE AND PROCESSING	Transcription
VC_1073	1323.41	1.08037	0.11807	9.15026	5.67944e-20	5.22719e-19	VC_1073	-	putative Chitodextrinase precursor	G	METABOLISM	Carbohydrate transport and metabolism
VC_0630	2888.32	1.07979	0.107189	10.0737	7.22336e-24	8.67677e-23	VC_0630	-	putative Peptidase M23B	M	CELLULAR PROCESSES AND SIGNALING	Cell wall/membrane/envelope biogenesis
VC_1120	1027.49	1.0795	0.0969232	11.1377	8.22578e-29	1.3404e-27	VC_1120	-	putative AMINE OXIDASE	R	POORLY CHARACTERIZED	General function prediction only
VC_0446	4728.85	1.07579	0.117807	9.13175	6.74028e-20	6.18923e-19	VC_0446	-	putative LPS-assembly protein 1 precursor (Organic solvent tolerance protein 1)	M	CELLULAR PROCESSES AND SIGNALING	Cell wall/membrane/envelope biogenesis
VC_0958	564.951	1.07429	0.126409	8.49858	1.91929e-17	1.47603e-16	VC_0958	lnt	Apolipoprotein N-acyltransferase	M	CELLULAR PROCESSES AND SIGNALING	Cell wall/membrane/envelope biogenesis
VC_0544	869.297	1.07352	0.120145	8.9352	4.06454e-19	3.49797e-18	VC_0544	-	putative Regulatory protein recX	R	POORLY CHARACTERIZED	General function prediction only
VC_2763	161.749	1.0703	0.174827	6.12206	9.23707e-10	3.84572e-09	VC_2763	atpC	ATP synthase epsilon chain	C	METABOLISM	Energy production and conversion
VC_1063	352.532	1.06973	0.137271	7.7928	6.55385e-15	4.1166e-14	VC_1063	tesB	acyl-CoA thioesterase II	I	METABOLISM	Lipid transport and metabolism
VC_A0636	914.265	1.06621	0.121459	8.77835	1.65896e-18	1.37704e-17	VC_A0636	-	putative Antibiotic biosynthesis monooxygenase	S	POORLY CHARACTERIZED	Function unknown
VC_0204	1230.19	1.06474	0.123148	8.64597	5.33523e-18	4.27679e-17	VC_0204	-	putative Helix-turn-helix protein RpiR fused with Sugar isomerase (putative DNA-binding transcriptional regulator)	K	INFORMATION STORAGE AND PROCESSING	Transcription
VC_A0037	19242.2	1.06255	0.0920949	11.5375	8.53565e-31	1.57119e-29	VC_A0037	-	putative Copper metallochaperone, bacterial analog of Cox17 protein	S	POORLY CHARACTERIZED	Function unknown
VC_1578	1385.47	1.06177	0.0947827	11.2021	3.98013e-29	6.67721e-28	VC_1578	-	-	-	-	-
VC_A0308	10561.2	1.06047	0.103273	10.2686	9.76468e-25	1.24837e-23	VC_A0308	-	putative Deoxyguanosinetriphosphate triphosphohydrolase	F	METABOLISM	Nucleotide transport and metabolism
VC_0905	253.415	1.05852	0.151971	6.96529	3.27735e-12	1.64946e-11	VC_0905	metQ	D-methionine-binding lipoprotein metQ	P	METABOLISM	Inorganic ion transport and metabolism
VC_0646	5277.31	1.0569	0.0795069	13.2932	2.53665e-40	8.92541e-39	VC_0646	rpsO	30S ribosomal protein S15	J	INFORMATION STORAGE AND PROCESSING	Translation, ribosomal structure and biogenesis
VC_1676	36.9381	1.05519	0.313578	3.36499	0.000765451	0.00165945	VC_1676	-	putative Phage shock protein C	K, T	INFORMATION STORAGE AND PROCESSING, CELLULAR PROCESSES AND SIGNALING	Transcription, Signal transduction mechanisms
VC_A0157	402.424	1.05309	0.126339	8.33544	7.72119e-17	5.73821e-16	VC_A0157	-	putative monovalent cation/H+ antiporter subunit A and B	C, P	METABOLISM, METABOLISM	Energy production and conversion, Inorganic ion transport and metabolism
VC_0050	6150.41	1.05089	0.0977817	10.7473	6.10325e-27	8.96539e-26	VC_0050	-	putative DNA topoisomerase I-related protein	L	INFORMATION STORAGE AND PROCESSING	Replication, recombination and repair
VC_0023	295.707	1.05088	0.133626	7.86436	3.70981e-15	2.37142e-14	VC_0023	-	-	-	-	-
VC_0980	930.624	1.0494	0.0995094	10.5458	5.31443e-26	7.28627e-25	VC_0980	-	putative Cell division inhibitor	R	POORLY CHARACTERIZED	General function prediction only
VC_2348	177.01	1.04478	0.17384	6.00998	1.85541e-09	7.50467e-09	VC_2348	deoB	phosphopentomutase	G	METABOLISM	Carbohydrate transport and metabolism
VC_1915	36.5933	1.0443	0.344166	3.0343	0.00241097	0.0048268	VC_1915	rpsA	30S ribosomal subunit protein S1	J	INFORMATION STORAGE AND PROCESSING	Translation, ribosomal structure and biogenesis
VC_2660	849.701	1.04367	0.118615	8.79879	1.38295e-18	1.1576e-17	VC_2660	efp	Elongation factor EF-P	J	INFORMATION STORAGE AND PROCESSING	Translation, ribosomal structure and biogenesis
VC_r017	167.136	1.04165	0.164334	6.3386	2.31858e-10	1.00094e-09	VC_r017	-	-	-	-	-
VC_2216	1284.06	1.04023	0.109434	9.50558	1.98935e-21	2.05446e-20	VC_2216	bus5	Secretion protein Bus5	R	POORLY CHARACTERIZED	General function prediction only
VC_A0290	96.0186	1.03788	0.241643	4.29512	1.74601e-05	4.71929e-05	VC_A0290	rplT	50S ribosomal subunit protein L20	J	INFORMATION STORAGE AND PROCESSING	Translation, ribosomal structure and biogenesis
VC_2607	174.941	1.03605	0.18553	5.58427	2.34689e-08	8.72079e-08	VC_2607	kefG	Glutathione-regulated potassium-efflux system ancillary protein kefG	R	POORLY CHARACTERIZED	General function prediction only
VC_A0576	1046.33	1.03316	0.0957149	10.7942	3.66836e-27	5.44231e-26	VC_A0576	hutA	Heme receptor	P	METABOLISM	Inorganic ion transport and metabolism
VC_0563	7622.48	1.03294	0.119337	8.65563	4.9019e-18	3.94533e-17	VC_0563	trmD	tRNA (guanine-N(1)-)-methyltransferase	J	INFORMATION STORAGE AND PROCESSING	Translation, ribosomal structure and biogenesis
VC_2352	5726.66	1.03127	0.0902322	11.4291	2.99343e-30	5.45958e-29	VC_2352	nupX	Nucleoside permease nupX	F	METABOLISM	Nucleotide transport and metabolism
VC_0444	1558.93	1.03099	0.0963843	10.6966	1.05548e-26	1.5205e-25	VC_0444	pdxA	4-hydroxythreonine-4-phosphate dehydrogenase	H	METABOLISM	Coenzyme transport and metabolism
VC_1864	1302.07	1.03064	0.105342	9.78373	1.32247e-22	1.48955e-21	VC_1864	hisP	Histidine transport ATP-binding protein hisP	E	METABOLISM	Amino acid transport and metabolism
VC_2591	640.974	1.02999	0.111917	9.20313	3.47657e-20	3.27556e-19	VC_2591	rplV	50S ribosomal subunit protein L22	J	INFORMATION STORAGE AND PROCESSING	Translation, ribosomal structure and biogenesis
VC_0872	2568.32	1.02972	0.0963174	10.6909	1.1233e-26	1.60804e-25	VC_0872	-	-	-	-	-
VC_0863	382.389	1.02948	0.129518	7.9485	1.88786e-15	1.24273e-14	VC_0863	-	putative p-aminobenzoyl-glutamate transporter	H	METABOLISM	Coenzyme transport and metabolism
VC_0258	16920.8	1.02928	0.0887069	11.6032	3.9707e-31	7.59014e-30	VC_0258	-	Ogawa specific antigen rfbT (fragment)	Q, R	METABOLISM, POORLY CHARACTERIZED	Secondary metabolites biosynthesis, transport and catabolism, General function prediction only
VC_A0125	4520.47	1.02926	0.0830292	12.3963	2.73579e-35	6.63262e-34	VC_A0125	-	-	-	-	-
VC_2571	3367.89	1.02887	0.0888089	11.5852	4.89866e-31	9.31918e-30	VC_2571	rpoA	DNA-directed RNA polymerase subunit alpha	K	INFORMATION STORAGE AND PROCESSING	Transcription
VC_0543	492.242	1.02822	0.138531	7.42229	1.15116e-13	6.50145e-13	VC_0543	recA	Protein recA	L	INFORMATION STORAGE AND PROCESSING	Replication, recombination and repair
VC_2414	4746.26	1.02814	0.129984	7.90975	2.57902e-15	1.67279e-14	VC_2414	aceE	Pyruvate dehydrogenase E1 component	C	METABOLISM	Energy production and conversion
VC_A0697	1002.92	1.0274	0.141532	7.25915	3.8954e-13	2.11297e-12	VC_A0697	-	putative c-di-GMP synthetase with PAS domain	T	CELLULAR PROCESSES AND SIGNALING	Signal transduction mechanisms
VC_2019	2698.51	1.02396	0.100721	10.1663	2.80465e-24	3.46313e-23	VC_2019	fabF	3-oxoacyl-[acyl-carrier-protein] synthase 2	I, Q	METABOLISM, METABOLISM	Lipid transport and metabolism, Secondary metabolites biosynthesis, transport and catabolism
VC_0769	97.0526	1.02329	0.202496	5.05337	4.34091e-07	1.40321e-06	VC_0769	-	putative Chitinase	R	POORLY CHARACTERIZED	General function prediction only
VC_A0913	245.846	1.02203	0.143785	7.10806	1.17685e-12	6.19755e-12	VC_A0913	-	TonB system transport protein ExbD1	P	METABOLISM	Inorganic ion transport and metabolism
VC_2341	236.13	1.0216	0.160216	6.37638	1.81324e-10	7.8878e-10	VC_2341	-	putative Long-chain-fatty-acid--CoA ligase	I	METABOLISM	Lipid transport and metabolism
VC_1209	4502.83	1.01934	0.111829	9.11517	7.85467e-20	7.16289e-19	VC_1209	-	putative translation elongation factor P-like protein	J	INFORMATION STORAGE AND PROCESSING	Translation, ribosomal structure and biogenesis
VC_2462	4012.51	1.01921	0.0893678	11.4047	3.96348e-30	7.09855e-29	VC_2462	lepB	Signal peptidase I	U	CELLULAR PROCESSES AND SIGNALING	Intracellular trafficking, secretion, and vesicular transport
VC_1538	2049.53	1.01796	0.0947186	10.7472	6.11071e-27	8.96539e-26	VC_1538	-	-	-	-	-
VC_2570	521.412	1.01675	0.116383	8.73628	2.40904e-18	1.9668e-17	VC_2570	rplQ	50S ribosomal subunit protein L17	J	INFORMATION STORAGE AND PROCESSING	Translation, ribosomal structure and biogenesis
VC_0009	696.585	1.01468	0.12451	8.1494	3.65723e-16	2.56006e-15	VC_0009	patM	putative ABC-type amino acid transport system, permease component	E	METABOLISM	Amino acid transport and metabolism
VC_A0220	4190.91	1.01342	0.0903713	11.2139	3.48429e-29	5.89513e-28	VC_A0220	hlyB	Hemolysin secretion protein	N, T	CELLULAR PROCESSES AND SIGNALING, CELLULAR PROCESSES AND SIGNALING	Cell motility, Signal transduction mechanisms
VC_A0982	125.204	1.01274	0.201321	5.03048	4.89263e-07	1.57387e-06	VC_A0982	-	putative Lactate-responsive regulator, LysR family	K	INFORMATION STORAGE AND PROCESSING	Transcription
VC_2183	680.095	1.01232	0.115533	8.76224	1.9141e-18	1.57567e-17	VC_2183	prs	Ribose-phosphate pyrophosphokinase	E, F	METABOLISM, METABOLISM	Amino acid transport and metabolism, Nucleotide transport and metabolism
VC_0414	2173.41	1.01193	0.13325	7.59418	3.0975e-14	1.82454e-13	VC_0414	-	-	-	-	-
VC_A0827	3757.29	1.0077	0.0950969	10.5966	3.09081e-26	4.32713e-25	VC_A0827	phhB	Pterin-4-alpha-carbinolamine dehydratase	H	METABOLISM	Coenzyme transport and metabolism
VC_A0099	2058.74	1.00681	0.109842	9.16604	4.90699e-20	4.55845e-19	VC_A0099	-	putative dehydrogenase	R	POORLY CHARACTERIZED	General function prediction only
VC_2512	14297.4	1.00674	0.106565	9.44721	3.47998e-21	3.55692e-20	VC_2512	-	Putative translation initiation inhibitor, yjgF family (Endoribonuclease L-PSP)	J	INFORMATION STORAGE AND PROCESSING	Translation, ribosomal structure and biogenesis
VC_r013	644.602	1.00645	0.109475	9.19345	3.80445e-20	3.56757e-19	VC_r013	-	-	-	-	-
VC_0954	47.9557	1.00618	0.282711	3.55905	0.000372203	0.000847097	VC_0954	-	putative LPS-assembly lipoprotein RlpB precursor (Rare lipoprotein B)	M	CELLULAR PROCESSES AND SIGNALING	Cell wall/membrane/envelope biogenesis
VC_0321	158.272	1.00366	0.18633	5.38648	7.1851e-08	2.55985e-07	VC_0321	tufA	Elongation factor Tu-A	J	INFORMATION STORAGE AND PROCESSING	Translation, ribosomal structure and biogenesis
VC_2211	320.864	1.00323	0.141319	7.09908	1.25591e-12	6.59642e-12	VC_2211	viuA	Vibriobactin receptor	P	METABOLISM	Inorganic ion transport and metabolism
VC_A0941	341.58	1.00305	0.165597	6.05718	1.38533e-09	5.67256e-09	VC_A0941	-	putative CYTOSOLIC ACYL COENZYME A THIOESTER HYDROLASE	I	METABOLISM	Lipid transport and metabolism
VC_2022	1073.72	0.998554	0.0955283	10.453	1.42014e-25	1.89478e-24	VC_2022	fabD	malonyl-CoA-[acyl-carrier-protein] transacylase	I	METABOLISM	Lipid transport and metabolism
VC_1144	1498.38	0.996814	0.107808	9.24618	2.32662e-20	2.22371e-19	VC_1144	clpA	ATP-dependent Clp protease ATP-binding subunit clpA	O	CELLULAR PROCESSES AND SIGNALING	Posttranslational modification, protein turnover, chaperones
VC_1117	592.279	0.993899	0.114142	8.70755	3.10517e-18	2.52477e-17	VC_1117	htpX	Heat shock protein htpX	O	CELLULAR PROCESSES AND SIGNALING	Posttranslational modification, protein turnover, chaperones
VC_2679	517.479	0.993246	0.150285	6.60907	3.86754e-11	1.78185e-10	VC_2679	rpmE	50S ribosomal subunit protein L31	J	INFORMATION STORAGE AND PROCESSING	Translation, ribosomal structure and biogenesis
VC_1941	241.824	0.992069	0.148156	6.69611	2.14048e-11	1.01195e-10	VC_1941	-	putative OpgC protein	S	POORLY CHARACTERIZED	Function unknown
VC_1516	873.358	0.987757	0.126796	7.79012	6.69435e-15	4.19161e-14	VC_1516	-	putative 4Fe-4S ferredoxin	C	METABOLISM	Energy production and conversion
VC_0875	4448.27	0.987407	0.0865404	11.4098	3.73695e-30	6.75369e-29	VC_0875	proS	prolyl-tRNA synthetase	J	INFORMATION STORAGE AND PROCESSING	Translation, ribosomal structure and biogenesis
VC_A0289	11433.3	0.986122	0.0880806	11.1957	4.28071e-29	7.1513e-28	VC_A0289	rpmI	50S ribosomal subunit protein L35	J	INFORMATION STORAGE AND PROCESSING	Translation, ribosomal structure and biogenesis
VC_2508	23010.1	0.985152	0.0826504	11.9195	9.36664e-33	1.91968e-31	VC_2508	argI	ornithine carbamoyltransferase 1	E	METABOLISM	Amino acid transport and metabolism
VC_1506	57.9772	0.984719	0.263475	3.73743	0.000185911	0.000439465	VC_1506	-	-	-	-	-
VC_2575	6854.47	0.983988	0.13414	7.3355	2.20889e-13	1.23178e-12	VC_2575	rpmJ	50S ribosomal subunit protein L36	J	INFORMATION STORAGE AND PROCESSING	Translation, ribosomal structure and biogenesis
VC_0233	744.843	0.982963	0.104541	9.40265	5.32058e-21	5.3556e-20	VC_0233	waaA	3-deoxy-D-manno-octulosonic-acid transferase	M	CELLULAR PROCESSES AND SIGNALING	Cell wall/membrane/envelope biogenesis
VC_1208	177.49	0.982399	0.162715	6.03753	1.56494e-09	6.36217e-09	VC_1208	-	conserved hypothetical protein	S	POORLY CHARACTERIZED	Function unknown
VC_A0107	342.605	0.981924	0.143875	6.82483	8.80298e-12	4.29456e-11	VC_A0107	-	conserved hypothetical protein	S	POORLY CHARACTERIZED	Function unknown
VC_2589	46.8627	0.981707	0.300287	3.26923	0.00107841	0.0022868	VC_2589	rplP	50S ribosomal subunit protein L16	J	INFORMATION STORAGE AND PROCESSING	Translation, ribosomal structure and biogenesis
VC_A0027	1272.76	0.979954	0.0959713	10.2109	1.77196e-24	2.22952e-23	VC_A0027	chiA	Chitinase A	G, R	METABOLISM, POORLY CHARACTERIZED	Carbohydrate transport and metabolism, General function prediction only
VC_0610	10181	0.979544	0.0814646	12.0242	2.65272e-33	5.64022e-32	VC_0610	fbpC	ATPase FbpC (Iron(III) ABC transporter, ATP-binding protein)	E	METABOLISM	Amino acid transport and metabolism
VC_2251	2132.18	0.979215	0.0858701	11.4035	4.01848e-30	7.16479e-29	VC_2251	-	putative Outer membrane chaperone Skp (OmpH)	M	CELLULAR PROCESSES AND SIGNALING	Cell wall/membrane/envelope biogenesis
VC_1367	11833	0.978191	0.0865449	11.3027	1.2725e-29	2.24865e-28	VC_1367	-	putative GGDEF family protein	R, T	POORLY CHARACTERIZED, CELLULAR PROCESSES AND SIGNALING	General function prediction only, Signal transduction mechanisms
VC_1710	1680.36	0.977391	0.129093	7.57121	3.69769e-14	2.16524e-13	VC_1710	-	putative EAL,PAS/PAC, CBS domains protein	R, T	POORLY CHARACTERIZED, CELLULAR PROCESSES AND SIGNALING	General function prediction only, Signal transduction mechanisms
VC_1585	9793.38	0.976867	0.0799655	12.2161	2.55002e-34	5.82693e-33	VC_1585	katB	Catalase	P	METABOLISM	Inorganic ion transport and metabolism
VC_0236	155.128	0.973164	0.185152	5.25602	1.47206e-07	5.0587e-07	VC_0236	rfaF	ADP-heptose--LPS heptosyltransferase 2	M	CELLULAR PROCESSES AND SIGNALING	Cell wall/membrane/envelope biogenesis
VC_2301	12045.1	0.972543	0.127464	7.62993	2.34889e-14	1.39599e-13	VC_2301	-	putative Anti-sigma factor ChrR	T	CELLULAR PROCESSES AND SIGNALING	Signal transduction mechanisms
VC_2771	1813.73	0.967607	0.0998849	9.68722	3.41711e-22	3.72231e-21	VC_2771	atpI	ATP synthase subunit I	C	METABOLISM	Energy production and conversion
VC_0234	19208.3	0.967452	0.0822952	11.7559	6.58748e-32	1.29663e-30	VC_0234	-	putative Mannosyltransferase OCH1 and related enzyme	M	CELLULAR PROCESSES AND SIGNALING	Cell wall/membrane/envelope biogenesis
VC_A0760	732.368	0.96686	0.116423	8.3047	1.00068e-16	7.39538e-16	VC_A0760	artP	Arginine transport ATP-binding protein ArtP	E	METABOLISM	Amino acid transport and metabolism
VC_r001	2304.55	0.965932	0.0994093	9.71671	2.55904e-22	2.82632e-21	VC_r001	-	-	-	-	-
VC_1418	7751.85	0.965804	0.0960283	10.0575	8.51352e-24	1.01347e-22	VC_1418	-	-	-	-	-
VC_1168	1071.48	0.965446	0.0994466	9.70819	2.7824e-22	3.06449e-21	VC_1168	-	putative proton/glutamate symporter	C	METABOLISM	Energy production and conversion
VC_0016	5774.81	0.965173	0.107717	8.96023	3.23998e-19	2.80657e-18	VC_0016	-	-	-	-	-
VC_2226	1103.8	0.964301	0.119489	8.07019	7.01881e-16	4.78675e-15	VC_2226	purM	Phosphoribosylformylglycinamidine cyclo-ligase	F	METABOLISM	Nucleotide transport and metabolism
VC_1712	442.842	0.964234	0.152802	6.31035	2.7841e-10	1.19671e-09	VC_1712	-	Putative threonine efflux protein	E	METABOLISM	Amino acid transport and metabolism
VC_1256	206.161	0.962743	0.189896	5.06984	3.9815e-07	1.29545e-06	VC_1256	nrdA	ribonucleoside diphosphate reductase 1, alpha subunit	F	METABOLISM	Nucleotide transport and metabolism
VC_r010	234.929	0.959609	0.14498	6.61891	3.61864e-11	1.67299e-10	VC_r010	-	-	-	-	-
VC_0481	1441.47	0.958918	0.11317	8.47326	2.38621e-17	1.81754e-16	VC_0481	argO	Arginine exporter protein argO	R	POORLY CHARACTERIZED	General function prediction only
VC_2316	1840.59	0.956429	0.109919	8.7012	3.28398e-18	2.66471e-17	VC_2316	argA	Amino-acid acetyltransferase	E	METABOLISM	Amino acid transport and metabolism
VC_2249	29424	0.956298	0.0941637	10.1557	3.12554e-24	3.84741e-23	VC_2249	fabZ	(3R)-hydroxymyristoyl-[acyl-carrier-protein] dehydratase	I	METABOLISM	Lipid transport and metabolism
VC_2248	64.7934	0.952274	0.287121	3.31664	0.000911083	0.00195387	VC_2248	lpxA	Acyl-[acyl-carrier-protein]--UDP-N-acetylglucosamine O-acyltransferase	M	CELLULAR PROCESSES AND SIGNALING	Cell wall/membrane/envelope biogenesis
VC_1741	1169.8	0.950514	0.103862	9.15166	5.60664e-20	5.17216e-19	VC_1741	-	putative Transcription regulator, TetR-like	K	INFORMATION STORAGE AND PROCESSING	Transcription
VC_0959	827.044	0.950037	0.101814	9.33111	1.04769e-20	1.03109e-19	VC_0959	corC	Magnesium and cobalt efflux protein corC	P	METABOLISM	Inorganic ion transport and metabolism
VC_1171	372.168	0.945518	0.126756	7.45934	8.69581e-14	4.9676e-13	VC_1171	trpCF	Tryptophan biosynthesis protein trpCF [Includes: Indole-3-glycerol phosphate synthase ; N-(5'-phospho-ribosyl)anthranilate isomerase]	E	METABOLISM	Amino acid transport and metabolism
VC_0475	712.116	0.940602	0.113058	8.31963	8.82418e-17	6.53351e-16	VC_0475	irgA	Iron-regulated outer membrane virulence protein	P	METABOLISM	Inorganic ion transport and metabolism
VC_1625	2097.11	0.938691	0.108632	8.64098	5.57347e-18	4.45878e-17	VC_1625	-	fragment of putative diaminobutyrate--2-oxoglutarate aminotransferase fused with Diaminobutyrate decarboxylase (part 2)	E	METABOLISM	Amino acid transport and metabolism
VC_0051	1176.86	0.937007	0.104383	8.97664	2.79161e-19	2.43944e-18	VC_0051	-	putative Phosphoribosylaminoimidazole carboxylase	F	METABOLISM	Nucleotide transport and metabolism
VC_0538	626.132	0.935401	0.117636	7.95169	1.8399e-15	1.21317e-14	VC_0538	cysP	Thiosulfate-binding protein	P	METABOLISM	Inorganic ion transport and metabolism
VC_1102	2756.2	0.933959	0.0954849	9.78122	1.35564e-22	1.52261e-21	VC_1102	-	Putative ABC transporter, permease protein	R	POORLY CHARACTERIZED	General function prediction only
VC_0230	10300.3	0.929597	0.11599	8.01448	1.10605e-15	7.41595e-15	VC_0230	-	putative dTDP/UDP-glucose pyrophosphorylase	M	CELLULAR PROCESSES AND SIGNALING	Cell wall/membrane/envelope biogenesis
VC_A0110	383.792	0.928267	0.179253	5.17853	2.23636e-07	7.49095e-07	VC_A0110	-	putative Protein ImpG/VasA	S	POORLY CHARACTERIZED	Function unknown
VC_A0439	2041.82	0.927127	0.106773	8.68319	3.84824e-18	3.10988e-17	VC_A0439	mccF	Microcin C7 self-immunity protein MccF	V	CELLULAR PROCESSES AND SIGNALING	Defense mechanisms
VC_A0566	2534.75	0.926685	0.091482	10.1297	4.07894e-24	4.9596e-23	VC_A0566	-	putative TWO-COMPONENT SYSTEM SENSOR HISTIDINE KINASE/RESPONSE REGULATOR	K, T	INFORMATION STORAGE AND PROCESSING, CELLULAR PROCESSES AND SIGNALING	Transcription, Signal transduction mechanisms
VC_0431	275.496	0.925738	0.140163	6.60474	3.9821e-11	1.8325e-10	VC_0431	argR	Arginine repressor	K	INFORMATION STORAGE AND PROCESSING	Transcription
VC_1048	107.48	0.925725	0.204323	4.53069	5.87924e-06	1.68172e-05	VC_1048	-	Putative nitroreductase	C	METABOLISM	Energy production and conversion
VC_A0169	193.569	0.925249	0.191061	4.84269	1.28091e-06	3.96645e-06	VC_A0169	-	-	-	-	-
VC_1255	211.5	0.924368	0.154432	5.98561	2.15577e-09	8.69303e-09	VC_1255	nrdB	Ribonucleoside-diphosphate reductase 1 subunit beta	F	METABOLISM	Nucleotide transport and metabolism
VC_A0088	2013.87	0.923855	0.0925211	9.98535	1.76673e-23	2.07213e-22	VC_A0088	-	putative Na+/H+-dicarboxylate symporter	C	METABOLISM	Energy production and conversion
VC_1655	155.858	0.923303	0.168518	5.47897	4.2781e-08	1.55767e-07	VC_1655	-	putative Mg/Co/Ni transporter MgtE	P	METABOLISM	Inorganic ion transport and metabolism
VC_0578	115.419	0.920881	0.2093	4.39982	1.08341e-05	3.00184e-05	VC_0578	-	putative periplasmic or secreted lipoprotein OsmY	R	POORLY CHARACTERIZED	General function prediction only
VC_1213	951.448	0.917892	0.125259	7.32794	2.33722e-13	1.29606e-12	VC_1213	uvrY	Response regulator uvrY	K, T	INFORMATION STORAGE AND PROCESSING, CELLULAR PROCESSES AND SIGNALING	Transcription, Signal transduction mechanisms
VC_1808	735.134	0.916573	0.110663	8.28254	1.20577e-16	8.82896e-16	VC_1808	-	-	-	-	-
VC_2006	627.516	0.915288	0.124925	7.32669	2.35902e-13	1.30633e-12	VC_2006	-	putative CheY/CheW-like protein	N, T	CELLULAR PROCESSES AND SIGNALING, CELLULAR PROCESSES AND SIGNALING	Cell motility, Signal transduction mechanisms
VC_A0174	2891.91	0.914471	0.10235	8.93473	4.08162e-19	3.50508e-18	VC_A0174	-	conserved hypothetical protein	R	POORLY CHARACTERIZED	General function prediction only
VC_r004	1120.87	0.914354	0.115163	7.93964	2.02773e-15	1.3304e-14	VC_r004	-	-	-	-	-
VC_1524	271.547	0.912288	0.137311	6.64397	3.05346e-11	1.42662e-10	VC_1524	-	putative ABC-type tungstate transport system, permease protein	H	METABOLISM	Coenzyme transport and metabolism
VC_0052	9685.53	0.911841	0.115485	7.89573	2.88632e-15	1.85696e-14	VC_0052	purE	N5-carboxyaminoimidazole ribonucleotide mutase	F	METABOLISM	Nucleotide transport and metabolism
VC_A0513	356.245	0.911818	0.149504	6.09894	1.06775e-09	4.43613e-09	VC_A0513	tyrB	aromatic amino acid aminotransferase	E	METABOLISM	Amino acid transport and metabolism
VC_1979	1130.68	0.910114	0.103237	8.81575	1.18888e-18	9.99362e-18	VC_1979	-	putative Deoxyguanosinetriphosphate triphosphohydrolase	F	METABOLISM	Nucleotide transport and metabolism
VC_0231	877.561	0.90865	0.117627	7.72482	1.12012e-14	6.85169e-14	VC_0231	-	-	-	-	-
VC_2171	324.888	0.905716	0.139582	6.48878	8.65322e-11	3.87446e-10	VC_2171	pyrP	Uracil permease	F	METABOLISM	Nucleotide transport and metabolism
VC_2762	17341.8	0.905704	0.109091	8.30231	1.02103e-16	7.53172e-16	VC_2762	glmU	Bifunctional protein glmU [Includes: UDP-N-acetylglucosamine pyrophosphorylase ; Glucosamine-1-phosphate N-acetyltransferase]	M	CELLULAR PROCESSES AND SIGNALING	Cell wall/membrane/envelope biogenesis
VC_1776	3023.7	0.895187	0.086793	10.314	6.08826e-25	7.85939e-24	VC_1776	-	putative N-acetylneuraminate lyase	E, M	METABOLISM, CELLULAR PROCESSES AND SIGNALING	Amino acid transport and metabolism, Cell wall/membrane/envelope biogenesis
VC_A0789	40.5421	0.895086	0.2986	2.99761	0.00272108	0.00541222	VC_A0789	-	conserved hypothetical protein	S	POORLY CHARACTERIZED	Function unknown
VC_A0722	4049.59	0.893904	0.0917177	9.74626	1.91399e-22	2.14366e-21	VC_A0722	-	-	-	-	-
VC_1227	10079.4	0.893606	0.0880642	10.1472	3.40966e-24	4.17132e-23	VC_1227	-	-	-	-	-
VC_2590	3335.96	0.893131	0.0917972	9.72938	2.25956e-22	2.5095e-21	VC_2590	rpsC	30S ribosomal subunit protein S3	J	INFORMATION STORAGE AND PROCESSING	Translation, ribosomal structure and biogenesis
VC_1067	1143.05	0.892897	0.101595	8.78879	1.51176e-18	1.25748e-17	VC_1067	-	putative ABC-type amino acid transport/signal transduction systems, periplasmic component/domain	E, T	METABOLISM, CELLULAR PROCESSES AND SIGNALING	Amino acid transport and metabolism, Signal transduction mechanisms
VC_A1037	1021.44	0.890452	0.117925	7.55103	4.31829e-14	2.51357e-13	VC_A1037	bztD	Glutamate/glutamine/aspartate/asparagine transport ATP-binding protein BztD	E	METABOLISM	Amino acid transport and metabolism
VC_1766	999.226	0.890432	0.10082	8.83189	1.02918e-18	8.66955e-18	VC_1766	-	conserved hypothetical protein	S	POORLY CHARACTERIZED	Function unknown
VC_0564	381.835	0.889133	0.167382	5.312	1.08431e-07	3.78508e-07	VC_0564	rplS	50S ribosomal subunit protein L19	J	INFORMATION STORAGE AND PROCESSING	Translation, ribosomal structure and biogenesis
VC_1160	859.306	0.887158	0.105451	8.41296	3.99778e-17	3.01045e-16	VC_1160	-	putative Alpha-L-glutamate ligase-related protein	H, J	METABOLISM, INFORMATION STORAGE AND PROCESSING	Coenzyme transport and metabolism, Translation, ribosomal structure and biogenesis
VC_r007	1780.73	0.88701	0.0905594	9.79478	1.18551e-22	1.35448e-21	VC_r007	-	-	-	-	-
VC_0246	5164.84	0.886557	0.118547	7.47853	7.51578e-14	4.31208e-13	VC_0246	rfbH	putative ABC-type polysaccharide/polyol phosphate export systems, permease component	G, M	METABOLISM, CELLULAR PROCESSES AND SIGNALING	Carbohydrate transport and metabolism, Cell wall/membrane/envelope biogenesis
VC_0366	1630.28	0.885865	0.0979742	9.04182	1.5408e-19	1.36746e-18	VC_0366	rpsF	30S ribosomal subunit protein S6	J	INFORMATION STORAGE AND PROCESSING	Translation, ribosomal structure and biogenesis
VC_1146	47.2997	0.884789	0.299551	2.95371	0.00313976	0.00620154	VC_1146	grxA	glutaredoxin 1	O	CELLULAR PROCESSES AND SIGNALING	Posttranslational modification, protein turnover, chaperones
VC_A0167	3021.35	0.883448	0.102725	8.60011	7.96417e-18	6.29395e-17	VC_A0167	-	conserved protein of unknown function	S	POORLY CHARACTERIZED	Function unknown
VC_A0011	7285.1	0.883249	0.0924692	9.55182	1.27442e-21	1.33345e-20	VC_A0011	malT	HTH-type transcriptional regulator malT	K	INFORMATION STORAGE AND PROCESSING	Transcription
VC_0004	851.859	0.88257	0.11487	7.68323	1.55126e-14	9.38785e-14	VC_0004	oxaA	Inner membrane protein oxaA	U	CELLULAR PROCESSES AND SIGNALING	Intracellular trafficking, secretion, and vesicular transport
VC_1931	79.8306	0.882315	0.224117	3.93685	8.2559e-05	0.000206579	VC_1931	-	putative Selenoprotein O and cysteine-containing homolog	S	POORLY CHARACTERIZED	Function unknown
VC_A0661	2814.48	0.88094	0.107547	8.19123	2.58565e-16	1.85235e-15	VC_A0661	-	putative Domain amino terminal to FKBP-type peptidyl-prolyl isomerase	O	CELLULAR PROCESSES AND SIGNALING	Posttranslational modification, protein turnover, chaperones
VC_0368	109.418	0.88066	0.196733	4.47641	7.59069e-06	2.14199e-05	VC_0368	rpsR	30S ribosomal subunit protein S18	J	INFORMATION STORAGE AND PROCESSING	Translation, ribosomal structure and biogenesis
VC_0090	6241	0.878765	0.0817884	10.7444	6.29918e-27	9.20791e-26	VC_0090	vcmD	Multidrug efflux pump VcmD	V	CELLULAR PROCESSES AND SIGNALING	Defense mechanisms
VC_1484	162.234	0.878751	0.171913	5.1116	3.19449e-07	1.0523e-06	VC_1484	rmf	ribosome modulation factor	J	INFORMATION STORAGE AND PROCESSING	Translation, ribosomal structure and biogenesis
VC_0562	244.258	0.877838	0.157086	5.58827	2.29342e-08	8.53806e-08	VC_0562	rimM	Ribosome maturation factor rimM	J	INFORMATION STORAGE AND PROCESSING	Translation, ribosomal structure and biogenesis
VC_A0892	1952.47	0.877824	0.109178	8.04031	8.96113e-16	6.04914e-15	VC_A0892	-	-	-	-	-
VC_1745	172.673	0.875996	0.176706	4.95735	7.1461e-07	2.27121e-06	VC_1745	gabD	Succinate-semialdehyde dehydrogenase [NADP+]	C	METABOLISM	Energy production and conversion
VC_2681	373.78	0.875901	0.157704	5.55409	2.79058e-08	1.0283e-07	VC_2681	-	NAD-dependent malic enzyme	C	METABOLISM	Energy production and conversion
VC_1321	4328.76	0.873896	0.117164	7.45876	8.73425e-14	4.98241e-13	VC_1321	-	putative Membrane carboxypeptidase (penicillin-binding protein)	M	CELLULAR PROCESSES AND SIGNALING	Cell wall/membrane/envelope biogenesis
VC_A0694	11329.7	0.872836	0.0906079	9.63311	5.79477e-22	6.21025e-21	VC_A0694	-	-	-	-	-
VC_2646	1243.86	0.871473	0.095958	9.08183	1.06768e-19	9.60431e-19	VC_2646	ppc	Phosphoenolpyruvate carboxylase	C	METABOLISM	Energy production and conversion
VC_1162	625.235	0.870189	0.119742	7.26717	3.67087e-13	2.00486e-12	VC_1162	-	conserved hypothetical protein	O	CELLULAR PROCESSES AND SIGNALING	Posttranslational modification, protein turnover, chaperones
VC_0034	1961.81	0.867748	0.105004	8.26396	1.40921e-16	1.02619e-15	VC_0034	dsbA	Thiol:disulfide interchange protein DsbA	C, O	METABOLISM, CELLULAR PROCESSES AND SIGNALING	Energy production and conversion, Posttranslational modification, protein turnover, chaperones
VC_0156	3051.06	0.867184	0.105652	8.20791	2.2508e-16	1.61829e-15	VC_0156	-	putative Outer membrane vitamin B12 receptor BtuB	H	METABOLISM	Coenzyme transport and metabolism
VC_A1027	589.001	0.865348	0.110321	7.84389	4.368e-15	2.77431e-14	VC_A1027	-	-	-	-	-
VC_1222	48.4506	0.865221	0.300808	2.87632	0.00402342	0.00781109	VC_1222	ihfA	Integration host factor subunit alpha	L	INFORMATION STORAGE AND PROCESSING	Replication, recombination and repair
VC_1344	55885.1	0.864004	0.0836952	10.3232	5.5335e-25	7.16651e-24	VC_1344	hpd	4-hydroxyphenylpyruvate dioxygenase	E, R	METABOLISM, POORLY CHARACTERIZED	Amino acid transport and metabolism, General function prediction only
VC_2283	501.912	0.862605	0.114027	7.56493	3.88066e-14	2.26904e-13	VC_2283	-	putative Na+-dependent transporter of the SNF family	R	POORLY CHARACTERIZED	General function prediction only
VC_r021	256.126	0.862163	0.151671	5.68442	1.3126e-08	4.99777e-08	VC_r021	-	-	-	-	-
VC_A0806	332.494	0.861013	0.192052	4.48322	7.35241e-06	2.07622e-05	VC_A0806	-	-	-	-	-
VC_1765	744.735	0.860283	0.113799	7.55968	4.04065e-14	2.35912e-13	VC_1765	-	putative Type I site-specific restriction-modification system, R (restriction) subunit and related helicase	V	CELLULAR PROCESSES AND SIGNALING	Defense mechanisms
VC_1740	1702.48	0.860076	0.0914935	9.40041	5.43503e-21	5.44324e-20	VC_1740	fadE	acyl coenzyme A dehydrogenase	I	METABOLISM	Lipid transport and metabolism
VC_0070	20706.5	0.859944	0.0934174	9.20539	3.40447e-20	3.21524e-19	VC_0070	-	-	-	-	-
VC_0799	2689.34	0.859642	0.108755	7.90438	2.69277e-15	1.74088e-14	VC_0799	citF	Citrate lyase alpha chain	C	METABOLISM	Energy production and conversion
VC_2026	554.274	0.859567	0.167136	5.14291	2.70513e-07	8.97047e-07	VC_2026	-	putative metal-binding/nucleic acid-binding protein	R	POORLY CHARACTERIZED	General function prediction only
VC_0483	193.873	0.856891	0.159668	5.36672	8.01808e-08	2.83377e-07	VC_0483	-	conserved hypothetical protein	S	POORLY CHARACTERIZED	Function unknown
VC_0841	1482.87	0.856046	0.0943225	9.07573	1.12913e-19	1.01342e-18	VC_0841	acfC	Accessory colonization factor AcfC	R	POORLY CHARACTERIZED	General function prediction only
VC_0950	641.841	0.855999	0.133327	6.42031	1.35995e-10	5.99464e-10	VC_0950	mrdA	Penicillin-binding protein 2	M	CELLULAR PROCESSES AND SIGNALING	Cell wall/membrane/envelope biogenesis
VC_0762	117.592	0.855833	0.191548	4.46798	7.89606e-06	2.22342e-05	VC_0762	yfgL	Lipoprotein yfgL	S	POORLY CHARACTERIZED	Function unknown
VC_A0468	1834.95	0.854158	0.112658	7.58188	3.40588e-14	2.00026e-13	VC_A0468	higB2	plasmid stabilization system HigB protein (toxin of TA system HigB-HigA)	D, J	CELLULAR PROCESSES AND SIGNALING, INFORMATION STORAGE AND PROCESSING	Cell cycle control, cell division, chromosome partitioning, Translation, ribosomal structure and biogenesis
VC_0307	51.4957	0.853541	0.279313	3.05586	0.00224416	0.0045133	VC_0307	rho	transcription termination factor Rho	K	INFORMATION STORAGE AND PROCESSING	Transcription
VC_0069	62.0621	0.852189	0.248877	3.42414	0.000616754	0.00135932	VC_0069	-	putative FLORFENICOL EXPORTER	E, G, P, R	METABOLISM, METABOLISM, METABOLISM, POORLY CHARACTERIZED	Amino acid transport and metabolism, Carbohydrate transport and metabolism, Inorganic ion transport and metabolism, General function prediction only
VC_1423	538.071	0.851225	0.119047	7.15033	8.65693e-13	4.59545e-12	VC_1423	-	putative ATPase	L	INFORMATION STORAGE AND PROCESSING	Replication, recombination and repair
VC_A0551	263.865	0.849317	0.147011	5.77723	7.59394e-09	2.93939e-08	VC_A0551	-	-	-	-	-
VC_1649	571.846	0.849061	0.120573	7.04188	1.89662e-12	9.80735e-12	VC_1649	-	putative Peptidase, trypsin-like serine and cysteine	O	CELLULAR PROCESSES AND SIGNALING	Posttranslational modification, protein turnover, chaperones
VC_r018	459.821	0.848884	0.127932	6.63541	3.23591e-11	1.50479e-10	VC_r018	-	-	-	-	-
VC_A0085	326.248	0.848145	0.136768	6.20132	5.59912e-10	2.36579e-09	VC_A0085	-	putative Permease of the major facilitator superfamily	E, G, P, R	METABOLISM, METABOLISM, METABOLISM, POORLY CHARACTERIZED	Amino acid transport and metabolism, Carbohydrate transport and metabolism, Inorganic ion transport and metabolism, General function prediction only
VC_2417	3046.54	0.847702	0.0969667	8.74219	2.28629e-18	1.87429e-17	VC_2417	recJ	Single-stranded-DNA-specific exonuclease recJ	L	INFORMATION STORAGE AND PROCESSING	Replication, recombination and repair
VC_0443	15784.9	0.847387	0.118772	7.13456	9.70945e-13	5.14045e-12	VC_0443	ksgA	Dimethyladenosine transferase	J	INFORMATION STORAGE AND PROCESSING	Translation, ribosomal structure and biogenesis
VC_A0332	408.175	0.845504	0.139521	6.06003	1.36092e-09	5.57838e-09	VC_A0332	-	conserved hypothetical protein	S	POORLY CHARACTERIZED	Function unknown
VC_0296	467.614	0.845277	0.134187	6.29926	2.99061e-10	1.28409e-09	VC_0296	accB	Biotin carboxyl carrier protein of acetyl-CoA carboxylase	I	METABOLISM	Lipid transport and metabolism
VC_2078	487.089	0.845238	0.14313	5.90537	3.51864e-09	1.40182e-08	VC_2078	-	putative Ferrous iron transport protein A	P	METABOLISM	Inorganic ion transport and metabolism
VC_1018	1467.41	0.845168	0.116805	7.23573	4.6304e-13	2.50142e-12	VC_1018	uvrB	fragment of UvrABC system protein B (part 1)	L	INFORMATION STORAGE AND PROCESSING	Replication, recombination and repair
VC_2256	141.361	0.845157	0.192314	4.39467	1.1094e-05	3.0717e-05	VC_2256	uppS	undecaprenyl pyrophosphate synthase	I	METABOLISM	Lipid transport and metabolism
VC_2182	320.677	0.843608	0.165797	5.08819	3.61492e-07	1.18199e-06	VC_2182	ispE	4-diphosphocytidyl-2-C-methyl-D-erythritol kinase	I	METABOLISM	Lipid transport and metabolism
VC_1537	735.259	0.841597	0.117072	7.18873	6.53953e-13	3.5042e-12	VC_1537	-	putative Lipoprotein NlpC	M	CELLULAR PROCESSES AND SIGNALING	Cell wall/membrane/envelope biogenesis
VC_1279	2836.99	0.840078	0.0885142	9.49089	2.29076e-21	2.3535e-20	VC_1279	ApBetT	Betaine transporter	M	CELLULAR PROCESSES AND SIGNALING	Cell wall/membrane/envelope biogenesis
VC_0765	10300	0.83823	0.0915039	9.16059	5.16126e-20	4.78349e-19	VC_0765	-	-	-	-	-
VC_A0984	185.572	0.838093	0.161623	5.18548	2.15461e-07	7.2293e-07	VC_A0984	lldD	L-lactate dehydrogenase [cytochrome]	C	METABOLISM	Energy production and conversion
VC_r023	3307.61	0.8365	0.108615	7.70149	1.34493e-14	8.20158e-14	VC_r023	-	-	-	-	-
VC_1202	3390.38	0.834959	0.089251	9.35518	8.34561e-21	8.27485e-20	VC_1202	hutH	Histidine ammonia-lyase	E	METABOLISM	Amino acid transport and metabolism
VC_1097	64.326	0.83471	0.24391	3.42221	0.000621151	0.00136736	VC_1097	pta	phosphate acetyltransferase	C, R	METABOLISM, POORLY CHARACTERIZED	Energy production and conversion, General function prediction only
VC_A0109	37716.2	0.83354	0.0844335	9.87215	5.49758e-23	6.31745e-22	VC_A0109	-	conserved hypothetical protein	S	POORLY CHARACTERIZED	Function unknown
VC_0702	602.754	0.831398	0.108696	7.64887	2.02751e-14	1.2086e-13	VC_0702	-	conserved hypothetical protein	S	POORLY CHARACTERIZED	Function unknown
VC_A0663	119.841	0.830499	0.22858	3.6333	0.000279819	0.000648159	VC_A0663	-	putative Methyl-accepting chemotaxis protein	N, T	CELLULAR PROCESSES AND SIGNALING, CELLULAR PROCESSES AND SIGNALING	Cell motility, Signal transduction mechanisms
VC_1228	8535.56	0.825302	0.112692	7.3235	2.41583e-13	1.33407e-12	VC_1228	purT	phosphoribosylglycinamide formyltransferase 2	F	METABOLISM	Nucleotide transport and metabolism
VC_A0348	728.351	0.82516	0.108646	7.59492	3.07977e-14	1.81679e-13	VC_A0348	-	Plasmid stabilization system protein RelE (Toxin of TA system RelB-RelE)	R	POORLY CHARACTERIZED	General function prediction only
VC_1267	49.2908	0.824606	0.291296	2.83082	0.00464294	0.0089135	VC_1267	-	conserved hypothetical protein	S	POORLY CHARACTERIZED	Function unknown
VC_1096	1052.99	0.824481	0.104492	7.89039	3.01252e-15	1.93502e-14	VC_1096	-	putative Glutathione S-transferase, omega	O	CELLULAR PROCESSES AND SIGNALING	Posttranslational modification, protein turnover, chaperones
VC_2587	884.456	0.823556	0.111421	7.39137	1.45324e-13	8.17267e-13	VC_2587	rpsQ	30S ribosomal subunit protein S17	J	INFORMATION STORAGE AND PROCESSING	Translation, ribosomal structure and biogenesis
VC_1587	96.7817	0.819286	0.221669	3.69599	0.000219035	0.000514098	VC_1587	-	conserved hypothetical protein	S	POORLY CHARACTERIZED	Function unknown
VC_2510	6733.69	0.819216	0.141875	5.7742	7.73194e-09	2.98468e-08	VC_2510	pyrB	Aspartate carbamoyltransferase	F	METABOLISM	Nucleotide transport and metabolism
VC_0551	4876.31	0.816854	0.120988	6.75156	1.46267e-11	7.03214e-11	VC_0551	oadB-1	Oxaloacetate decarboxylase 1, subunit beta	C	METABOLISM	Energy production and conversion
VC_A0684	785.93	0.813356	0.139987	5.81022	6.23899e-09	2.43437e-08	VC_A0684	uhpC	Regulatory protein uhpC	G	METABOLISM	Carbohydrate transport and metabolism
VC_0060	767.39	0.812291	0.115293	7.04543	1.84886e-12	9.58417e-12	VC_0060	crcB	Camphor resistance CrcB protein	D	CELLULAR PROCESSES AND SIGNALING	Cell cycle control, cell division, chromosome partitioning
VC_A0781	14424.3	0.811107	0.0995877	8.14465	3.80374e-16	2.65327e-15	VC_A0781	-	putative ABC-type transport system permease component	Q	METABOLISM	Secondary metabolites biosynthesis, transport and catabolism
VC_r024	16670.7	0.808251	0.107191	7.5403	4.68898e-14	2.7177e-13	VC_r024	-	-	-	-	-
VC_A0819	333.387	0.807448	0.129852	6.21822	5.02812e-10	2.14045e-09	VC_A0819	groS	10 kDa chaperonin	O	CELLULAR PROCESSES AND SIGNALING	Posttranslational modification, protein turnover, chaperones
VC_2090	165.979	0.807261	0.16581	4.8686	1.12389e-06	3.51305e-06	VC_2090	sdhD	Succinate dehydrogenase hydrophobic membrane anchor subunit	C	METABOLISM	Energy production and conversion
VC_A0846	532.758	0.80679	0.119772	6.73603	1.62774e-11	7.7787e-11	VC_A0846	-	Putative threonine efflux protein	E	METABOLISM	Amino acid transport and metabolism
VC_1437	964.449	0.806301	0.12476	6.46281	1.0278e-10	4.5813e-10	VC_1437	-	putative Type cbb3 cytochrome oxidase biogenesis protein CcoI; Copper-translocating P-type ATPase	P	METABOLISM	Inorganic ion transport and metabolism
VC_A0975	4173.04	0.80466	0.100826	7.98069	1.45518e-15	9.69148e-15	VC_A0975	-	Putative protease La homolog	O	CELLULAR PROCESSES AND SIGNALING	Posttranslational modification, protein turnover, chaperones
VC_A0504	345.916	0.802972	0.131091	6.12528	9.05243e-10	3.77279e-09	VC_A0504	-	-	-	-	-
VC_2643	262.645	0.80046	0.215688	3.7112	0.000206278	0.000485878	VC_2643	argB	acetylglutamate kinase	E	METABOLISM	Amino acid transport and metabolism
VC_A0544	232.442	0.798395	0.152819	5.22445	1.74674e-07	5.95118e-07	VC_A0544	-	putative ATP-dependent endonuclease of the OLD family	L	INFORMATION STORAGE AND PROCESSING	Replication, recombination and repair
VC_0714	20958.7	0.797233	0.112318	7.09802	1.26553e-12	6.63819e-12	VC_0714	-	-	-	-	-
VC_2005	86.6029	0.796867	0.238645	3.33913	0.000840398	0.00181303	VC_2005	-	-	-	-	-
VC_A0595	3918.4	0.796581	0.0893125	8.91903	4.70388e-19	4.02207e-18	VC_A0595	-	conserved hypothetical protein	S	POORLY CHARACTERIZED	Function unknown
VC_1973	371.769	0.793741	0.127284	6.23598	4.48947e-10	1.91525e-09	VC_1973	menB	Naphthoate synthase	H	METABOLISM	Coenzyme transport and metabolism
VC_0170	434.569	0.792486	0.128473	6.16848	6.89502e-10	2.89795e-09	VC_0170	gsiA	Glutathione import ATP-binding protein gsiA	R	POORLY CHARACTERIZED	General function prediction only
VC_1135	204.57	0.788502	0.153186	5.14735	2.64189e-07	8.77539e-07	VC_1135	hisB	Histidine biosynthesis bifunctional protein hisB [Includes: Histidinol-phosphatase ; Imidazoleglycerol-phosphate dehydratase]	E	METABOLISM	Amino acid transport and metabolism
VC_A0721	2035.86	0.787059	0.0917111	8.58194	9.32841e-18	7.3445e-17	VC_A0721	-	-	-	-	-
VC_A0951	188.143	0.786503	0.182515	4.30925	1.63806e-05	4.44871e-05	VC_A0951	-	conserved hypothetical protein	S	POORLY CHARACTERIZED	Function unknown
VC_A0948	333.685	0.786395	0.19403	4.05295	5.05759e-05	0.000129318	VC_A0948	-	putative Rho-specific inhibitor of transcription termination (YaeO)	K	INFORMATION STORAGE AND PROCESSING	Transcription
VC_A0391	543.82	0.784823	0.114836	6.83426	8.24275e-12	4.02619e-11	VC_A0391	higB	Plasmid stabilization system HigB protein (Toxin of TA system HigB-HigA)	R	POORLY CHARACTERIZED	General function prediction only
VC_0941	3324.21	0.784204	0.0879427	8.91721	4.78166e-19	4.07981e-18	VC_0941	glyA	serine hydroxymethyltransferase	E	METABOLISM	Amino acid transport and metabolism
VC_1565	2386.32	0.784085	0.120545	6.50448	7.79605e-11	3.4946e-10	VC_1565	-	putative Type I secretion outer membrane protein, TolC precursor	M, U	CELLULAR PROCESSES AND SIGNALING, CELLULAR PROCESSES AND SIGNALING	Cell wall/membrane/envelope biogenesis, Intracellular trafficking, secretion, and vesicular transport
VC_A0745	4981.81	0.783103	0.0956968	8.18316	2.76488e-16	1.9701e-15	VC_A0745	-	membrane protein of unknown function	G	METABOLISM	Carbohydrate transport and metabolism
VC_1907	136.508	0.781562	0.201012	3.88814	0.000101015	0.000249309	VC_1907	cysB	HTH-type transcriptional regulator cysB	K	INFORMATION STORAGE AND PROCESSING	Transcription
VC_A0337	455.946	0.780329	0.129417	6.02958	1.64389e-09	6.6763e-09	VC_A0337	mccF	Microcin C7 self-immunity protein MccF	V	CELLULAR PROCESSES AND SIGNALING	Defense mechanisms
VC_0677	127.671	0.780069	0.195998	3.97998	6.89225e-05	0.00017377	VC_0677	nhaR	Transcriptional activator protein nhaR	K	INFORMATION STORAGE AND PROCESSING	Transcription
VC_A0150	648.726	0.77789	0.116675	6.66717	2.60785e-11	1.22563e-10	VC_A0150	def2	Peptide deformylase 2	J	INFORMATION STORAGE AND PROCESSING	Translation, ribosomal structure and biogenesis
VC_0082	122.821	0.774029	0.183723	4.21303	2.51964e-05	6.68763e-05	VC_0082	rmuC	DNA recombination protein rmuC	S	POORLY CHARACTERIZED	Function unknown
VC_A0985	4797.43	0.774014	0.105588	7.3305	2.2929e-13	1.27505e-12	VC_A0985	-	putative D-LACTATE DEHYDROGENASE	C	METABOLISM	Energy production and conversion
VC_1775	1549.96	0.772149	0.0969057	7.96805	1.61196e-15	1.06819e-14	VC_1775	-	putative DNA-binding transcriptional regulator	K	INFORMATION STORAGE AND PROCESSING	Transcription
VC_2686	447.783	0.770723	0.136043	5.6653	1.46763e-08	5.55744e-08	VC_2686	zapB	Cell division protein ZapB	S	POORLY CHARACTERIZED	Function unknown
VC_A0969	218.032	0.769027	0.176647	4.35348	1.33995e-05	3.67678e-05	VC_A0969	-	putative Pirin-related protein	R	POORLY CHARACTERIZED	General function prediction only
VC_0166	111.473	0.768461	0.20461	3.75574	0.00017283	0.000410744	VC_0166	-	putative TetR family transcriptional regulator	K	INFORMATION STORAGE AND PROCESSING	Transcription
VC_2365	421.076	0.768032	0.125343	6.12745	8.92994e-10	3.72565e-09	VC_2365	-	-	-	-	-
VC_0465	177.204	0.767265	0.162837	4.71187	2.4546e-06	7.33795e-06	VC_0465	tyrS1	Tyrosyl-tRNA synthetase 1	J	INFORMATION STORAGE AND PROCESSING	Translation, ribosomal structure and biogenesis
VC_0229	1071.09	0.767039	0.117539	6.52583	6.76263e-11	3.03994e-10	VC_0229	-	-	-	-	-
VC_2561	729.256	0.766375	0.108476	7.06493	1.60699e-12	8.37406e-12	VC_2561	sumT	uroporphyrin-III C-methyltransferase	H	METABOLISM	Coenzyme transport and metabolism
VC_A0112	645.725	0.765218	0.11128	6.87648	6.13483e-12	3.02632e-11	VC_A0112	-	putative component of the type VI protein secretion system	T	CELLULAR PROCESSES AND SIGNALING	Signal transduction mechanisms
VC_0609	238.824	0.763704	0.156713	4.87327	1.09763e-06	3.43637e-06	VC_0609	-	putative ABC-type Fe3+ transport system, permease component	P	METABOLISM	Inorganic ion transport and metabolism
VC_0430	2095.76	0.76337	0.094723	8.05897	7.69416e-16	5.21158e-15	VC_0430	-	putative TRAP transporter solute receptor, TAXI family, periplasmic component	R	POORLY CHARACTERIZED	General function prediction only
VC_1771	492.311	0.762822	0.145347	5.24829	1.53514e-07	5.2573e-07	VC_1771	-	-	-	-	-
VC_0880	4035.27	0.762422	0.113589	6.7121	1.91844e-11	9.10228e-11	VC_0880	-	putative p-aminobenzoyl-glutamate transporter	H	METABOLISM	Coenzyme transport and metabolism
VC_t017	91.184	0.760623	0.236187	3.22042	0.00128001	0.0026786	VC_t017	-	-	-	-	-
VC_1916	2668.91	0.759937	0.0869302	8.74192	2.29177e-18	1.87491e-17	VC_1916	cmk	cytidylate kinase	F	METABOLISM	Nucleotide transport and metabolism
VC_A0247	391.272	0.759801	0.161228	4.71259	2.44587e-06	7.31737e-06	VC_A0247	ulaR	HTH-type transcriptional regulator ulaR	G, K	METABOLISM, INFORMATION STORAGE AND PROCESSING	Carbohydrate transport and metabolism, Transcription
VC_A0048	213.408	0.759513	0.156592	4.85025	1.23306e-06	3.8272e-06	VC_A0048	-	-	-	-	-
VC_A0052	224.092	0.758122	0.169004	4.48583	7.26299e-06	2.05389e-05	VC_A0052	-	-	-	-	-
VC_A0108	1458.39	0.758104	0.111817	6.77987	1.20281e-11	5.81796e-11	VC_A0108	-	conserved hypothetical protein	S	POORLY CHARACTERIZED	Function unknown
VC_2535	11044.1	0.757209	0.101731	7.44322	9.82602e-14	5.56528e-13	VC_2535	pmbA	Protein pmbA	R	POORLY CHARACTERIZED	General function prediction only
VC_1952	88.5359	0.755725	0.214726	3.51949	0.000432382	0.000976236	VC_1952	chiA	Endochitinase ChiA	G, R	METABOLISM, POORLY CHARACTERIZED	Carbohydrate transport and metabolism, General function prediction only
VC_A0120	1012.11	0.754652	0.178387	4.23043	2.33243e-05	6.2198e-05	VC_A0120	-	putative Type VI secretion system, IcmF	S	POORLY CHARACTERIZED	Function unknown
VC_2546	1808.51	0.754008	0.112232	6.71829	1.8387e-11	8.73436e-11	VC_2546	-	conserved hypothetical protein	S	POORLY CHARACTERIZED	Function unknown
VC_1481	545.306	0.753905	0.124166	6.07176	1.26515e-09	5.20727e-09	VC_1481	matP	conserved hypothetical protein	S	POORLY CHARACTERIZED	Function unknown
VC_0395	198.938	0.753362	0.176864	4.25954	2.04847e-05	5.48835e-05	VC_0395	gtaB	UTP--glucose-1-phosphate uridylyltransferase	M	CELLULAR PROCESSES AND SIGNALING	Cell wall/membrane/envelope biogenesis
VC_1253	21807.4	0.751268	0.101385	7.41005	1.26249e-13	7.10999e-13	VC_1253	-	-	-	-	-
VC_0247	1312.42	0.750735	0.0922841	8.13504	4.11806e-16	2.86249e-15	VC_0247	rfbI	putative ABC-type polysaccharide/polyol phosphate transport system, ATPase component	G, M	METABOLISM, CELLULAR PROCESSES AND SIGNALING	Carbohydrate transport and metabolism, Cell wall/membrane/envelope biogenesis
VC_A0441	3059.5	0.748315	0.102072	7.33122	2.28072e-13	1.27005e-12	VC_A0441	-	-	-	-	-
VC_2672	83.1949	0.747101	0.235863	3.16752	0.00153743	0.00317055	VC_2672	rraA	Regulator of ribonuclease activity A	H	METABOLISM	Coenzyme transport and metabolism
VC_0986	1018.95	0.747059	0.127806	5.84527	5.05747e-09	1.9904e-08	VC_0986	adk	adenylate kinase	F	METABOLISM	Nucleotide transport and metabolism
VC_1154	4337.71	0.746448	0.0903289	8.26367	1.41257e-16	1.02676e-15	VC_1154	-	-	-	-	-
VC_2759	721.7	0.745476	0.106897	6.97381	3.08475e-12	1.56043e-11	VC_2759	fadA	3-ketoacyl-CoA thiolase	I	METABOLISM	Lipid transport and metabolism
VC_0058	367.549	0.74467	0.127754	5.82894	5.57812e-09	2.18508e-08	VC_0058	-	putative carbonic anhydrase	R	POORLY CHARACTERIZED	General function prediction only
VC_1184	460.429	0.744173	0.116895	6.36615	1.93837e-10	8.40455e-10	VC_1184	-	putative Cysteine desulfurase	E	METABOLISM	Amino acid transport and metabolism
VC_2020	74.0993	0.74346	0.243057	3.05879	0.00222235	0.00447395	VC_2020	acp	Acyl carrier protein	I, Q	METABOLISM, METABOLISM	Lipid transport and metabolism, Secondary metabolites biosynthesis, transport and catabolism
VC_1861	992.265	0.74267	0.102276	7.26146	3.82924e-13	2.08562e-12	VC_1861	hisM	Histidine transport system permease protein hisM	E	METABOLISM	Amino acid transport and metabolism
VC_A0960	751.961	0.74171	0.103216	7.18598	6.67255e-13	3.57067e-12	VC_A0960	-	putative GGDEF family protein WITH chase DOMAIN	T	CELLULAR PROCESSES AND SIGNALING	Signal transduction mechanisms
VC_0688	6309.16	0.740806	0.0873519	8.48071	2.23827e-17	1.71142e-16	VC_0688	-	-	-	-	-
VC_2413	5525.79	0.740446	0.0927768	7.98094	1.45221e-15	9.68792e-15	VC_2413	aceF	Dihydrolipoyllysine-residue acetyltransferase component of pyruvate dehydrogenase complex	C	METABOLISM	Energy production and conversion
VC_2422	132.584	0.739743	0.208414	3.54938	0.000386136	0.000877301	VC_2422	nadC	Nicotinate-nucleotide pyrophosphorylase [carboxylating]	H	METABOLISM	Coenzyme transport and metabolism
VC_2769	641.984	0.738843	0.111697	6.61473	3.72227e-11	1.71691e-10	VC_2769	atpE	ATP synthase subunit c	C	METABOLISM	Energy production and conversion
VC_0647	347.445	0.738614	0.154651	4.77601	1.78804e-06	5.42692e-06	VC_0647	pnp	Polyribonucleotide nucleotidyltransferase	J	INFORMATION STORAGE AND PROCESSING	Translation, ribosomal structure and biogenesis
VC_2598	1136.58	0.736338	0.104847	7.02297	2.17207e-12	1.11291e-11	VC_2598	rlmB	23S rRNA (guanosine-2'-O-)-methyltransferase rlmB	J	INFORMATION STORAGE AND PROCESSING	Translation, ribosomal structure and biogenesis
VC_2725	610.793	0.736029	0.112151	6.56284	5.27913e-11	2.40985e-10	VC_2725	-	putative General secretion pathway protein L	U	CELLULAR PROCESSES AND SIGNALING	Intracellular trafficking, secretion, and vesicular transport
VC_0991	383.025	0.734462	0.143066	5.13372	2.84071e-07	9.40439e-07	VC_0991	asnB	Asparagine synthetase B [glutamine-hydrolyzing]	E	METABOLISM	Amino acid transport and metabolism
VC_1850	3764.33	0.734166	0.110121	6.66692	2.61227e-11	1.22626e-10	VC_1850	lpxH	UDP-2,3-diacylglucosamine hydrolase	S	POORLY CHARACTERIZED	Function unknown
VC_0747	200.18	0.73239	0.15598	4.6954	2.66089e-06	7.9308e-06	VC_0747	iscR	HTH-type transcriptional regulator iscR	K	INFORMATION STORAGE AND PROCESSING	Transcription
VC_2204	173.518	0.732164	0.189492	3.86383	0.000111621	0.000273615	VC_2204	-	putative Negative regulator of flagellin synthesis FlgM	K, N, U	INFORMATION STORAGE AND PROCESSING, CELLULAR PROCESSES AND SIGNALING, CELLULAR PROCESSES AND SIGNALING	Transcription, Cell motility, Intracellular trafficking, secretion, and vesicular transport
VC_0966	2295.9	0.731565	0.0951195	7.691	1.45984e-14	8.86156e-14	VC_0966	ptsH	Phosphocarrier protein HPr	G	METABOLISM	Carbohydrate transport and metabolism
VC_1719	1496.67	0.73148	0.097465	7.50505	6.14045e-14	3.54346e-13	VC_1719	torR	TorCAD operon transcriptional regulatory protein torR	K, T	INFORMATION STORAGE AND PROCESSING, CELLULAR PROCESSES AND SIGNALING	Transcription, Signal transduction mechanisms
VC_0474	95.8069	0.730258	0.203802	3.58317	0.000339453	0.00077567	VC_0474	irgB	Iron-regulated virulence regulatory protein irgB	K	INFORMATION STORAGE AND PROCESSING	Transcription
VC_A1011	69.1035	0.72956	0.259648	2.8098	0.00495724	0.00945776	VC_A1011	-	Putative Glutaredoxin family protein	O	CELLULAR PROCESSES AND SIGNALING	Posttranslational modification, protein turnover, chaperones
VC_0219	1872.01	0.728841	0.0883721	8.24741	1.61862e-16	1.17011e-15	VC_0219	rpmG	50S ribosomal protein L33	J	INFORMATION STORAGE AND PROCESSING	Translation, ribosomal structure and biogenesis
VC_1368	187.495	0.728402	0.173792	4.19123	2.77452e-05	7.32503e-05	VC_1368	-	-	-	-	-
VC_0036	7657.12	0.72662	0.0889719	8.16686	3.16531e-16	2.2354e-15	VC_0036	-	putative Cytochrome c oxidase cbb3 type, accessory protein FixG	C	METABOLISM	Energy production and conversion
VC_1846	187.686	0.725213	0.176456	4.10989	3.95847e-05	0.000102134	VC_1846	ruvA	Holliday junction ATP-dependent DNA helicase ruvA	L	INFORMATION STORAGE AND PROCESSING	Replication, recombination and repair
VC_1681	272.041	0.723951	0.143673	5.0389	4.68218e-07	1.5074e-06	VC_1681	sapB	Peptide transport system permease protein sapB	V	CELLULAR PROCESSES AND SIGNALING	Defense mechanisms
VC_2750	434.037	0.723499	0.128023	5.65134	1.59197e-08	5.9997e-08	VC_2750	-	putative EAL and GGDEF domains family protein	N, T	CELLULAR PROCESSES AND SIGNALING, CELLULAR PROCESSES AND SIGNALING	Cell motility, Signal transduction mechanisms
VC_A0814	254.312	0.722665	0.143755	5.02706	4.98054e-07	1.60086e-06	VC_A0814	speB	Agmatinase	E	METABOLISM	Amino acid transport and metabolism
VC_A0221	670.413	0.722561	0.109613	6.59191	4.34202e-11	1.99122e-10	VC_A0221	lipA	Lipase	R	POORLY CHARACTERIZED	General function prediction only
VC_1126	370.142	0.721011	0.133925	5.38368	7.29768e-08	2.59531e-07	VC_1126	purB	Adenylosuccinate lyase	F	METABOLISM	Nucleotide transport and metabolism
VC_A0645	1266.17	0.72038	0.101192	7.11893	1.08766e-12	5.73547e-12	VC_A0645	-	putative Glyoxalase/Bleomycin resistance protein/Dihydroxybiphenyl dioxygenase	R	POORLY CHARACTERIZED	General function prediction only
VC_1350	2056.43	0.718449	0.104068	6.90364	5.06864e-12	2.51597e-11	VC_1350	PRXIID	Peroxiredoxin-2D	O	CELLULAR PROCESSES AND SIGNALING	Posttranslational modification, protein turnover, chaperones
VC_0394	854.138	0.717317	0.111813	6.41533	1.40522e-10	6.18047e-10	VC_0394	uvrA	UvrABC system protein A	L	INFORMATION STORAGE AND PROCESSING	Replication, recombination and repair
VC_1923	245.868	0.716773	0.141553	5.06363	4.1135e-07	1.33404e-06	VC_1923	tig	Trigger factor	O	CELLULAR PROCESSES AND SIGNALING	Posttranslational modification, protein turnover, chaperones
VC_A0189	3289.94	0.715433	0.102491	6.98042	2.94293e-12	1.49343e-11	VC_A0189	-	putative Signal receiver domain fused with Chemotaxis protein CheC	N, T	CELLULAR PROCESSES AND SIGNALING, CELLULAR PROCESSES AND SIGNALING	Cell motility, Signal transduction mechanisms
VC_1778	1520.9	0.715297	0.0976352	7.32622	2.36728e-13	1.30908e-12	VC_1778	-	putative TRAP-type transport system, small permease component, N-acetylneuraminate transporter	G	METABOLISM	Carbohydrate transport and metabolism
VC_A0624	4528.96	0.714661	0.0918032	7.78471	6.9875e-15	4.35459e-14	VC_A0624	tktA	transketolase 1	G	METABOLISM	Carbohydrate transport and metabolism
VC_0249	822.85	0.712047	0.117014	6.08515	1.16383e-09	4.82413e-09	VC_0249	rfbL	putative LONG-CHAIN-FATTY-ACID--COA LIGASE	I, Q	METABOLISM, METABOLISM	Lipid transport and metabolism, Secondary metabolites biosynthesis, transport and catabolism
VC_A0994	1491.16	0.711258	0.0994451	7.15227	8.53553e-13	4.53707e-12	VC_A0994	-	putative pentein-type domain protein	S	POORLY CHARACTERIZED	Function unknown
VC_2119	2669.68	0.709737	0.108732	6.52742	6.69112e-11	3.0129e-10	VC_2119	-	putative Smr protein/MutS2 C-terminal domain containing protein	S	POORLY CHARACTERIZED	Function unknown
VC_A0116	39272.4	0.705961	0.0955597	7.38764	1.49452e-13	8.38114e-13	VC_A0116	clpB	Chaperone protein ClpB	O	CELLULAR PROCESSES AND SIGNALING	Posttranslational modification, protein turnover, chaperones
VC_0075	239.268	0.705819	0.150435	4.69186	2.70727e-06	8.06301e-06	VC_0075	-	putative Carboxylate/Amino Acid/Amine Transporter	E, G, R	METABOLISM, METABOLISM, POORLY CHARACTERIZED	Amino acid transport and metabolism, Carbohydrate transport and metabolism, General function prediction only
VC_r020	399.092	0.704114	0.121062	5.81612	6.0228e-09	2.35232e-08	VC_r020	-	-	-	-	-
VC_1680	2800.19	0.7033	0.085949	8.18277	2.77402e-16	1.97308e-15	VC_1680	sapA	Peptide transport periplasmic protein sapA	E	METABOLISM	Amino acid transport and metabolism
VC_0694	16387.4	0.702781	0.133981	5.24536	1.55976e-07	5.33702e-07	VC_0694	-	putative Autolysin sensor kinase	T	CELLULAR PROCESSES AND SIGNALING	Signal transduction mechanisms
VC_0815	66.0454	0.702291	0.239784	2.92885	0.00340222	0.00669664	VC_0815	-	putative HipA-like protein	R	POORLY CHARACTERIZED	General function prediction only
VC_A1113	258419	0.701979	0.104842	6.69559	2.14803e-11	1.01432e-10	VC_A1113	-	putative ABC transporter, periplasmic spermidine putrescine-binding protein potD	E	METABOLISM	Amino acid transport and metabolism
VC_0914	3420.8	0.70149	0.0901344	7.78271	7.09896e-15	4.41713e-14	VC_0914	-	putative RND multidrug efflux transporter; Acriflavin resistance protein	V	CELLULAR PROCESSES AND SIGNALING	Defense mechanisms
VC_A0612	2827.25	0.701238	0.131625	5.32755	9.95477e-08	3.48724e-07	VC_A0612	mscL	Large-conductance mechanosensitive channel	M	CELLULAR PROCESSES AND SIGNALING	Cell wall/membrane/envelope biogenesis
VC_2021	1130.99	0.700986	0.105761	6.62801	3.40243e-11	1.5767e-10	VC_2021	fabG	3-oxoacyl-[acyl-carrier-protein] reductase	I, Q, R	METABOLISM, METABOLISM, POORLY CHARACTERIZED	Lipid transport and metabolism, Secondary metabolites biosynthesis, transport and catabolism, General function prediction only
VC_2696	26689.6	0.700233	0.111462	6.28227	3.33665e-10	1.42958e-09	VC_2696	-	putative FxsA cytoplasmic membrane protein	R	POORLY CHARACTERIZED	General function prediction only
VC_A0695	116.08	0.699888	0.197399	3.54555	0.000391789	0.000889636	VC_A0695	-	-	-	-	-
VC_A1065	1093.04	0.697794	0.0983136	7.09763	1.26915e-12	6.64842e-12	VC_A1065	-	-	-	-	-
VC_0561	246.982	0.695287	0.144466	4.81282	1.48812e-06	4.56895e-06	VC_0561	rpsP	30S ribosomal subunit protein S16	J	INFORMATION STORAGE AND PROCESSING	Translation, ribosomal structure and biogenesis
VC_0547	274.245	0.695271	0.15569	4.46573	7.97952e-06	2.24375e-05	VC_0547	lysC	aspartate kinase	E	METABOLISM	Amino acid transport and metabolism
VC_2025	1402.93	0.692714	0.134213	5.16132	2.45215e-07	8.17246e-07	VC_2025	rpmF	50S ribosomal protein L32	J	INFORMATION STORAGE AND PROCESSING	Translation, ribosomal structure and biogenesis
VC_0648	110.333	0.692402	0.223866	3.09293	0.00198192	0.00402457	VC_0648	nlpI	Lipoprotein nlpI	R	POORLY CHARACTERIZED	General function prediction only
VC_2569	228.074	0.690718	0.153635	4.49582	6.93018e-06	1.96536e-05	VC_2569	-	-	-	-	-
VC_1264	124.541	0.690343	0.188661	3.65916	0.00025304	0.000589043	VC_1264	-	putative Peptidase-M75	P	METABOLISM	Inorganic ion transport and metabolism
VC_1911	47371.5	0.689811	0.0920674	7.49246	6.75962e-14	3.89511e-13	VC_1911	pyrF	orotidine-5'-phosphate decarboxylase	F	METABOLISM	Nucleotide transport and metabolism
VC_1690	1429.77	0.687101	0.100788	6.81731	9.27612e-12	4.50328e-11	VC_1690	-	Putative alpha-1,6-galactosidase	G	METABOLISM	Carbohydrate transport and metabolism
VC_A0824	1070.02	0.686142	0.116234	5.90309	3.56746e-09	1.41984e-08	VC_A0824	ectB	Diaminobutyrate--2-oxoglutarate transaminase	E	METABOLISM	Amino acid transport and metabolism
VC_A1086	19084.9	0.685536	0.105051	6.52574	6.76646e-11	3.03994e-10	VC_A1086	-	Putative cheY domain fused with Serine phosphatase RsbU, regulator of sigma subunit	K, T	INFORMATION STORAGE AND PROCESSING, CELLULAR PROCESSES AND SIGNALING	Transcription, Signal transduction mechanisms
VC_1223	4374.08	0.685006	0.0938523	7.29877	2.90412e-13	1.59047e-12	VC_1223	-	-	-	-	-
VC_1963	2619.85	0.684504	0.10303	6.64373	3.05836e-11	1.42723e-10	VC_1963	-	conserved hypothetical protein	S	POORLY CHARACTERIZED	Function unknown
VC_A1036	11958.7	0.683311	0.0874965	7.80958	5.73787e-15	3.61549e-14	VC_A1036	aroG	Phospho-2-dehydro-3-deoxyheptonate aldolase	E	METABOLISM	Amino acid transport and metabolism
VC_2461	599.607	0.683193	0.107265	6.36924	1.89971e-10	8.2549e-10	VC_2461	rnc	Ribonuclease 3	K	INFORMATION STORAGE AND PROCESSING	Transcription
VC_2157	494.568	0.682896	0.116645	5.85446	4.78556e-09	1.88951e-08	VC_2157	dapA	4-hydroxy-tetrahydrodipicolinate synthase	E, M	METABOLISM, CELLULAR PROCESSES AND SIGNALING	Amino acid transport and metabolism, Cell wall/membrane/envelope biogenesis
VC_A0514	183.543	0.681652	0.162723	4.18904	2.80139e-05	7.38616e-05	VC_A0514	-	conserved hypothetical protein	O	CELLULAR PROCESSES AND SIGNALING	Posttranslational modification, protein turnover, chaperones
VC_0732	1313.87	0.681608	0.105063	6.48761	8.72063e-11	3.90025e-10	VC_0732	-	putative Bacterial regulatory protein, LysR	K	INFORMATION STORAGE AND PROCESSING	Transcription
VC_1951	5019.78	0.679589	0.0978013	6.94867	3.6875e-12	1.84421e-11	VC_1951	torY	Cytochrome c-type protein torY	C	METABOLISM	Energy production and conversion
VC_0251	494.779	0.679264	0.129243	5.25571	1.47455e-07	5.06288e-07	VC_0251	-	-	-	-	-
VC_A0186	341.139	0.678572	0.130831	5.18661	2.14152e-07	7.19144e-07	VC_A0186	-	-	-	-	-
VC_0136	446.824	0.67644	0.137801	4.90882	9.16244e-07	2.88439e-06	VC_0136	rhtB	homoserine/homoserine lactone efflux protein	E	METABOLISM	Amino acid transport and metabolism
VC_0040	125.217	0.675252	0.184547	3.65896	0.000253239	0.000589162	VC_0040	-	hemolysin	R	POORLY CHARACTERIZED	General function prediction only
VC_1059	803.325	0.674683	0.119544	5.64379	1.66351e-08	6.26336e-08	VC_1059	-	putative Glucose/ribitol dehydrogenase	I, Q, R	METABOLISM, METABOLISM, POORLY CHARACTERIZED	Lipid transport and metabolism, Secondary metabolites biosynthesis, transport and catabolism, General function prediction only
VC_2264	314.759	0.67338	0.132559	5.07985	3.77735e-07	1.23104e-06	VC_2264	-	-	-	-	-
VC_1588	759.078	0.672347	0.114493	5.87236	4.29628e-09	1.69801e-08	VC_1588	-	putative Transcriptional regulator of alpha-acetolactate operon alsR	K	INFORMATION STORAGE AND PROCESSING	Transcription
VC_1485	117.94	0.672118	0.204503	3.2866	0.00101405	0.00215839	VC_1485	-	conserved hypothetical protein	U	CELLULAR PROCESSES AND SIGNALING	Intracellular trafficking, secretion, and vesicular transport
VC_0295	39182.4	0.671059	0.0991094	6.77089	1.27993e-11	6.17596e-11	VC_0295	accC	Biotin carboxylase	I	METABOLISM	Lipid transport and metabolism
VC_2494	1071.99	0.670631	0.109353	6.1327	8.64013e-10	3.60853e-09	VC_2494	-	-	-	-	-
VC_1912	124.555	0.670068	0.185433	3.61352	0.000302065	0.000695029	VC_1912	-	putative tetratricopeptide repeat protein	G	METABOLISM	Carbohydrate transport and metabolism
VC_0603	238.145	0.669266	0.157611	4.2463	2.17326e-05	5.81094e-05	VC_0603	-	putative esterase of the alpha-beta hydrolase superfamily protein fused with Bacterial surface antigen	M, R	CELLULAR PROCESSES AND SIGNALING, POORLY CHARACTERIZED	Cell wall/membrane/envelope biogenesis, General function prediction only
VC_2689	285.997	0.667275	0.151407	4.40716	1.04734e-05	2.90797e-05	VC_2689	pfkA	6-phosphofructokinase	G	METABOLISM	Carbohydrate transport and metabolism
VC_2440	965.659	0.666403	0.11556	5.76672	8.08301e-09	3.11114e-08	VC_2440	-	putative Adenylate cyclase	S	POORLY CHARACTERIZED	Function unknown
VC_2384	246.746	0.666306	0.147743	4.50991	6.48559e-06	1.84718e-05	VC_2384	-	putative permease	R	POORLY CHARACTERIZED	General function prediction only
VC_A0342	1356.74	0.666073	0.114966	5.79363	6.88804e-09	2.6745e-08	VC_A0342	-	-	-	-	-
VC_1746	855.217	0.665065	0.148802	4.46946	7.8418e-06	2.20971e-05	VC_1746	-	putative Transcriptional regulator, TetR family	K	INFORMATION STORAGE AND PROCESSING	Transcription
VC_0283	6132.79	0.663659	0.0942605	7.04069	1.91295e-12	9.87776e-12	VC_0283	-	conserved hypothetical protein	S	POORLY CHARACTERIZED	Function unknown
VC_A0190	580.077	0.662991	0.112037	5.91758	3.26711e-09	1.30336e-08	VC_A0190	-	putative PAS/PAC domain-containing protein	T	CELLULAR PROCESSES AND SIGNALING	Signal transduction mechanisms
VC_A1082	257.932	0.662309	0.137788	4.80672	1.53429e-06	4.70341e-06	VC_A1082	-	fragment of putative GGDEF and EAL domain-containing protein (part 1)	T	CELLULAR PROCESSES AND SIGNALING	Signal transduction mechanisms
VC_1845	1745.72	0.660363	0.138692	4.76136	1.92295e-06	5.80536e-06	VC_1845	ruvB	Holliday junction ATP-dependent DNA helicase ruvB	L	INFORMATION STORAGE AND PROCESSING	Replication, recombination and repair
VC_1203	1281.51	0.65793	0.100736	6.5312	6.52451e-11	2.94121e-10	VC_1203	hutU	Urocanate hydratase	E	METABOLISM	Amino acid transport and metabolism
VC_2303	4457.38	0.656154	0.0828145	7.92318	2.31521e-15	1.50906e-14	VC_2303	-	putative peptidase	R	POORLY CHARACTERIZED	General function prediction only
VC_0892	1646.68	0.655121	0.116912	5.60356	2.09996e-08	7.83987e-08	VC_0892	pomA	Chemotaxis protein pomA	N	CELLULAR PROCESSES AND SIGNALING	Cell motility
VC_2214	3941.94	0.654901	0.112042	5.84515	5.0611e-09	1.9904e-08	VC_2214	gltX	Glutamyl-tRNA synthetase	J	INFORMATION STORAGE AND PROCESSING	Translation, ribosomal structure and biogenesis
VC_A0004	1493.63	0.654625	0.0923222	7.09065	1.33481e-12	6.96483e-12	VC_A0004	-	-	-	-	-
VC_1960	1249.32	0.654277	0.0969653	6.74754	1.5037e-11	7.21197e-11	VC_1960	minD	Septum site-determining protein minD	D	CELLULAR PROCESSES AND SIGNALING	Cell cycle control, cell division, chromosome partitioning
VC_A0882	12928.8	0.653743	0.100262	6.52035	7.01458e-11	3.14785e-10	VC_A0882	-	conserved hypothetical protein	N, T	CELLULAR PROCESSES AND SIGNALING, CELLULAR PROCESSES AND SIGNALING	Cell motility, Signal transduction mechanisms
VC_0173	167.133	0.653438	0.171672	3.80631	0.000141055	0.000340726	VC_0173	-	putative ABC-type dipeptide/oligopeptide/nickel transport systems, permease component	E, P	METABOLISM, METABOLISM	Amino acid transport and metabolism, Inorganic ion transport and metabolism
VC_A0248	1950.57	0.653186	0.13435	4.86183	1.16305e-06	3.61839e-06	VC_A0248	ulaG	putative L-ascorbate-6-phosphate lactonase ulaG	R	POORLY CHARACTERIZED	General function prediction only
VC_A0178	761.99	0.65315	0.12037	5.42618	5.75737e-08	2.07161e-07	VC_A0178	-	putative FrnE protein (dithiol-disulfide isomerase involved in polyketide biosynthesis)	Q	METABOLISM	Secondary metabolites biosynthesis, transport and catabolism
VC_1247	352.295	0.65256	0.151464	4.30834	1.64485e-05	4.46106e-05	VC_1247	-	putative Helicase subunit of the DNA excision repair complex	L	INFORMATION STORAGE AND PROCESSING	Replication, recombination and repair
VC_0305	324.075	0.651856	0.163671	3.98273	6.81288e-05	0.000172097	VC_0305	rhlB	ATP-dependent RNA helicase rhlB	J, K, L	INFORMATION STORAGE AND PROCESSING, INFORMATION STORAGE AND PROCESSING, INFORMATION STORAGE AND PROCESSING	Translation, ribosomal structure and biogenesis, Transcription, Replication, recombination and repair
VC_2564	3886.51	0.651665	0.107125	6.0832	1.17809e-09	4.87417e-09	VC_2564	dbpA	ATP-independent RNA helicase dbpA	J, K, L	INFORMATION STORAGE AND PROCESSING, INFORMATION STORAGE AND PROCESSING, INFORMATION STORAGE AND PROCESSING	Translation, ribosomal structure and biogenesis, Transcription, Replication, recombination and repair
VC_A0084	191.315	0.651167	0.168346	3.86802	0.000109721	0.000269125	VC_A0084	soxR	Redox-sensitive transcriptional activator soxR	K	INFORMATION STORAGE AND PROCESSING	Transcription
VC_2161	2018.58	0.649186	0.120705	5.37828	7.52008e-08	2.67201e-07	VC_2161	-	putative Methyl-accepting chemotaxis protein	N, T	CELLULAR PROCESSES AND SIGNALING, CELLULAR PROCESSES AND SIGNALING	Cell motility, Signal transduction mechanisms
VC_1832	738.156	0.648481	0.104293	6.21789	5.03882e-10	2.14271e-09	VC_1832	-	putative YgfB/YecA family protein	R	POORLY CHARACTERIZED	General function prediction only
VC_0037	775.369	0.648358	0.12102	5.35746	8.44001e-08	2.98024e-07	VC_0037	-	conserved hypothetical protein	S	POORLY CHARACTERIZED	Function unknown
VC_2260	5275.88	0.647835	0.107046	6.05194	1.43112e-09	5.85404e-09	VC_2260	rpsB	30S ribosomal protein S2	J	INFORMATION STORAGE AND PROCESSING	Translation, ribosomal structure and biogenesis
VC_2741	880.035	0.647767	0.127327	5.08742	3.6297e-07	1.18584e-06	VC_2741	dtd	D-tyrosyl-tRNA(Tyr) deacylase	J	INFORMATION STORAGE AND PROCESSING	Translation, ribosomal structure and biogenesis
VC_1280	8586.75	0.644956	0.0790951	8.15418	3.51549e-16	2.46519e-15	VC_1280	cod1	Chitin oligosaccharide deacetylase	G	METABOLISM	Carbohydrate transport and metabolism
VC_A0743	2403.41	0.644603	0.0850803	7.57641	3.5526e-14	2.08336e-13	VC_A0743	-	-	-	-	-
VC_2361	9201.65	0.643718	0.0953943	6.74798	1.49922e-11	7.19916e-11	VC_2361	grcA	Autonomous glycyl radical cofactor	R	POORLY CHARACTERIZED	General function prediction only
VC_A0130	108.176	0.643486	0.198486	3.24197	0.00118708	0.00249726	VC_A0130	rbsB	D-ribose-binding periplasmic protein	G	METABOLISM	Carbohydrate transport and metabolism
VC_0744	80.6655	0.643431	0.228912	2.81083	0.00494142	0.00943212	VC_0744	secF	Protein-export membrane protein secF	U	CELLULAR PROCESSES AND SIGNALING	Intracellular trafficking, secretion, and vesicular transport
VC_0785	5378.25	0.642934	0.106086	6.06047	1.3572e-09	5.56888e-09	VC_0785	-	-	-	-	-
VC_0007	225.416	0.642486	0.161809	3.97064	7.16791e-05	0.000180149	VC_0007	rpmH	50S ribosomal protein L34	J	INFORMATION STORAGE AND PROCESSING	Translation, ribosomal structure and biogenesis
VC_1266	193.346	0.641368	0.217558	2.94803	0.0031981	0.00631362	VC_1266	-	putative Iron-regulated protein A precursor	R	POORLY CHARACTERIZED	General function prediction only
VC_0687	63489.4	0.641355	0.0989448	6.48194	9.05499e-11	4.04524e-10	VC_0687	-	putative Carbon starvation protein A	T	CELLULAR PROCESSES AND SIGNALING	Signal transduction mechanisms
VC_2178	1008.01	0.640701	0.109583	5.84673	5.01316e-09	1.97545e-08	VC_2178	hemK	Protein methyltransferase hemK	J	INFORMATION STORAGE AND PROCESSING	Translation, ribosomal structure and biogenesis
VC_1633	13648.4	0.640321	0.0885961	7.22743	4.92235e-13	2.65553e-12	VC_1633	-	-	-	-	-
VC_A0533	1395.77	0.639286	0.097524	6.55517	5.55794e-11	2.52553e-10	VC_A0533	tatA	Sec-independent protein translocase protein TatA	U	CELLULAR PROCESSES AND SIGNALING	Intracellular trafficking, secretion, and vesicular transport
VC_2143	187.057	0.638069	0.167701	3.80481	0.000141912	0.000342381	VC_2143	flaD	Polar flagellin B/D	N	CELLULAR PROCESSES AND SIGNALING	Cell motility
VC_1483	353.788	0.636974	0.144045	4.42204	9.77743e-06	2.72234e-05	VC_1483	fabA	3-hydroxydecanoyl-[acyl-carrier-protein] dehydratase	I	METABOLISM	Lipid transport and metabolism
VC_0583	356.676	0.636145	0.126065	5.04618	4.50723e-07	1.4546e-06	VC_0583	hapR	Hemagglutinin/protease regulatory protein (part 1)	K	INFORMATION STORAGE AND PROCESSING	Transcription
VC_1141	568.862	0.634584	0.111923	5.66984	1.42935e-08	5.41763e-08	VC_1141	icd	Isocitrate dehydrogenase [NADP]	C	METABOLISM	Energy production and conversion
VC_2012	95.4739	0.633999	0.220584	2.87419	0.0040507	0.00786022	VC_2012	-	putative SODIUM/CHLORIDE-DEPENDENT NORADRENALINE TRANSPORTER	R	POORLY CHARACTERIZED	General function prediction only
VC_1659	2323.19	0.630152	0.102342	6.15729	7.39981e-10	3.10028e-09	VC_1659	-	putative membrane fusion protein (MFP) component of efflux pump, membrane anchor protein YbhG	M	CELLULAR PROCESSES AND SIGNALING	Cell wall/membrane/envelope biogenesis
VC_A1084	1793.34	0.627645	0.090241	6.9552	3.52051e-12	1.76737e-11	VC_A1084	-	putative ATPase, type I secretion system (ABC TRANSPORTER, TOXIN SECRETION (HEMOLYSIN B))	V	CELLULAR PROCESSES AND SIGNALING	Defense mechanisms
VC_2342	1098.2	0.625374	0.0971284	6.43862	1.20561e-10	5.33799e-10	VC_2342	fusA	Elongation factor G	J	INFORMATION STORAGE AND PROCESSING	Translation, ribosomal structure and biogenesis
VC_A0035	525.466	0.62485	0.120302	5.19401	2.05817e-07	6.94674e-07	VC_A0035	-	putative histidine phosphatase and vanadium haloperoxidase family protein	I	METABOLISM	Lipid transport and metabolism
VC_t070	205.464	0.624328	0.151623	4.11763	3.82797e-05	9.91702e-05	VC_t070	-	-	-	-	-
VC_2037	1037.2	0.62417	0.103221	6.04695	1.47616e-09	6.0259e-09	VC_2037	mleN	Malate-2H(+)/Na(+)-lactate antiporter	C	METABOLISM	Energy production and conversion
VC_A0392	199.636	0.624096	0.157025	3.9745	7.0526e-05	0.000177541	VC_A0392	-	Plasmid stabilization system HigA protein ( Antitoxin of TA system HigB-HigA)	R	POORLY CHARACTERIZED	General function prediction only
VC_1631	7245.51	0.623424	0.0996828	6.25408	3.99863e-10	1.70952e-09	VC_1631	-	putative Multi antimicrobial extrusion protein MatE	V	CELLULAR PROCESSES AND SIGNALING	Defense mechanisms
VC_2202	1025.32	0.622498	0.10558	5.896	3.72427e-09	1.47929e-08	VC_2202	-	putative CheY/CheW hybrid protein CheV	N, T	CELLULAR PROCESSES AND SIGNALING, CELLULAR PROCESSES AND SIGNALING	Cell motility, Signal transduction mechanisms
VC_0743	190.785	0.621729	0.176218	3.52819	0.000418408	0.000946836	VC_0743	secD	Protein-export membrane protein secD	U	CELLULAR PROCESSES AND SIGNALING	Intracellular trafficking, secretion, and vesicular transport
VC_A0086	33034.3	0.621159	0.0823586	7.54212	4.62386e-14	2.68386e-13	VC_A0086	-	-	-	-	-
VC_A0503	202.678	0.620867	0.158204	3.92448	8.69176e-05	0.000216532	VC_A0503	-	Plasmid stabilization system protein RelE (toxin of TA system RelB-E)	R	POORLY CHARACTERIZED	General function prediction only
VC_0232	752.448	0.620198	0.106388	5.8296	5.55589e-09	2.17852e-08	VC_0232	-	putative Capsule biosynthesis phosphatase	R	POORLY CHARACTERIZED	General function prediction only
VC_1061	318.417	0.619481	0.159472	3.88458	0.000102506	0.000252674	VC_1061	-	putative Cysteine synthase B	E	METABOLISM	Amino acid transport and metabolism
VC_0369	269.408	0.618937	0.150898	4.10169	4.10148e-05	0.000105687	VC_0369	rplI	50S ribosomal subunit protein L9	J	INFORMATION STORAGE AND PROCESSING	Translation, ribosomal structure and biogenesis
VC_0893	809.962	0.614722	0.133373	4.60905	4.04508e-06	1.18259e-05	VC_0893	motB	Sodium-driven polar flagellar protein	N	CELLULAR PROCESSES AND SIGNALING	Cell motility
VC_1204	413.901	0.614707	0.128105	4.79847	1.59878e-06	4.88231e-06	VC_1204	-	putative Formimidoylglutamase HutG	E	METABOLISM	Amino acid transport and metabolism
VC_1009	1617.23	0.614277	0.101254	6.06671	1.30556e-09	5.36803e-09	VC_1009	-	-	-	-	-
VC_A1073	223.841	0.612886	0.17163	3.57098	0.000355652	0.000810357	VC_A1073	putA	Bifunctional protein putA [Includes: Proline dehydrogenase ; Delta-1-pyrroline-5-carboxylate dehydrogenase]	C, E	METABOLISM, METABOLISM	Energy production and conversion, Amino acid transport and metabolism
VC_1219	5254.74	0.61272	0.087778	6.98033	2.94478e-12	1.49343e-11	VC_1219	pheS	phenylalanine tRNA synthetase, alpha subunit	J	INFORMATION STORAGE AND PROCESSING	Translation, ribosomal structure and biogenesis
VC_0979	1024.47	0.612632	0.0994072	6.16285	7.14459e-10	2.99651e-09	VC_0979	-	putative short-chain dehydrogenase/reductase family	I, Q, R	METABOLISM, METABOLISM, POORLY CHARACTERIZED	Lipid transport and metabolism, Secondary metabolites biosynthesis, transport and catabolism, General function prediction only
VC_0328	135.92	0.611657	0.178167	3.43305	0.000596823	0.00132199	VC_0328	rpoB	DNA-directed RNA polymerase subunit beta	K	INFORMATION STORAGE AND PROCESSING	Transcription
VC_0438	251.93	0.611435	0.158407	3.85991	0.000113431	0.00027788	VC_0438	yjjP	putative Inner membrane protein yjjP	S	POORLY CHARACTERIZED	Function unknown
VC_0502	185.222	0.610943	0.177337	3.4451	0.000570844	0.00126727	VC_0502	-	putative Pili subunit	N, U	CELLULAR PROCESSES AND SIGNALING, CELLULAR PROCESSES AND SIGNALING	Cell motility, Intracellular trafficking, secretion, and vesicular transport
VC_0378	634.286	0.610611	0.1167	5.23232	1.67392e-07	5.71779e-07	VC_0378	zur	Zinc uptake regulation protein	P	METABOLISM	Inorganic ion transport and metabolism
VC_0367	652.277	0.608398	0.107875	5.63986	1.70187e-08	6.38964e-08	VC_0367	priB	Primosomal replication protein N	L	INFORMATION STORAGE AND PROCESSING	Replication, recombination and repair
VC_1188	786.878	0.608108	0.105947	5.73976	9.48082e-09	3.62808e-08	VC_1188	sfcA	NAD-dependent malic enzyme	C	METABOLISM	Energy production and conversion
VC_0550	8638.05	0.607123	0.0941587	6.44787	1.13437e-10	5.03375e-10	VC_0550	oadA-1	Oxaloacetate decarboxylase 1, subunit alpha	C	METABOLISM	Energy production and conversion
VC_2277	2202.96	0.605538	0.0869277	6.96599	3.26094e-12	1.64328e-11	VC_2277	gpt	Xanthine phosphoribosyltransferase	F	METABOLISM	Nucleotide transport and metabolism
VC_A0790	602.088	0.604512	0.113252	5.33774	9.41128e-08	3.31437e-07	VC_A0790	-	conserved hypothetical protein	L	INFORMATION STORAGE AND PROCESSING	Replication, recombination and repair
VC_2176	3670.52	0.603717	0.107165	5.63352	1.76571e-08	6.62308e-08	VC_2176	-	putative Protein SirB1	S	POORLY CHARACTERIZED	Function unknown
VC_0130	669.587	0.603089	0.122409	4.92684	8.35692e-07	2.63917e-06	VC_0130	-	putative EAL family protein	S, T	POORLY CHARACTERIZED, CELLULAR PROCESSES AND SIGNALING	Function unknown, Signal transduction mechanisms
VC_1905	1837.09	0.603016	0.102296	5.89483	3.75068e-09	1.48829e-08	VC_1905	ald	alanine dehydrogenase	E	METABOLISM	Amino acid transport and metabolism
VC_A0115	293.64	0.60246	0.137983	4.3662	1.26425e-05	3.47866e-05	VC_A0115	-	putative Type VI protein secretion system component VasF	S	POORLY CHARACTERIZED	Function unknown
VC_2439	1941.67	0.601019	0.110883	5.42032	5.94912e-08	2.13674e-07	VC_2439	-	putative Methyl-accepting chemotaxis protein	N, T	CELLULAR PROCESSES AND SIGNALING, CELLULAR PROCESSES AND SIGNALING	Cell motility, Signal transduction mechanisms
VC_A0349	301.142	0.60089	0.148367	4.05003	5.12107e-05	0.000130857	VC_A0349	-	-	-	-	-
VC_2184	1372.25	0.600165	0.118682	5.05692	4.26087e-07	1.37845e-06	VC_2184	pth	peptidyl-tRNA hydrolase	J	INFORMATION STORAGE AND PROCESSING	Translation, ribosomal structure and biogenesis
VC_A0603	132.258	0.597387	0.184202	3.24311	0.00118233	0.00248859	VC_A0603	-	putative 2-aminoethylphosphonate ABC transporter, periplasmic	P	METABOLISM	Inorganic ion transport and metabolism
VC_0768	165.218	0.59642	0.163918	3.63854	0.000274188	0.000635669	VC_0768	guaA	GMP synthase [glutamine-hydrolyzing]	F	METABOLISM	Nucleotide transport and metabolism
VC_0800	268.663	0.596193	0.139015	4.28869	1.79733e-05	4.8383e-05	VC_0800	-	putative Apo-citrate lyase phosphoribosyl-dephospho-CoA transferase CitX	H, I	METABOLISM, METABOLISM	Coenzyme transport and metabolism, Lipid transport and metabolism
VC_A0117	142.232	0.594027	0.186473	3.18559	0.00144461	0.00299622	VC_A0117	-	putative Sigma-54 dependent transcriptional regulator	K, T	INFORMATION STORAGE AND PROCESSING, CELLULAR PROCESSES AND SIGNALING	Transcription, Signal transduction mechanisms
VC_0031	395.565	0.593707	0.12366	4.80112	1.57779e-06	4.82932e-06	VC_0031	ilvG	Acetolactate synthase isozyme 2 large subunit	E, H	METABOLISM, METABOLISM	Amino acid transport and metabolism, Coenzyme transport and metabolism
VC_A0230	447.212	0.59085	0.141429	4.17772	2.94443e-05	7.74787e-05	VC_A0230	-	putative ABC-type metal transport system, ATPase component	P	METABOLISM	Inorganic ion transport and metabolism
VC_A0783	452.684	0.589915	0.120133	4.91051	9.08402e-07	2.86197e-06	VC_A0783	tesA	Acyl-CoA thioesterase I	E	METABOLISM	Amino acid transport and metabolism
VC_1422	142.343	0.587684	0.174745	3.3631	0.000770734	0.00166908	VC_1422	-	putative Na+/alanine symporter	E	METABOLISM	Amino acid transport and metabolism
VC_A0864	1874.27	0.586501	0.111713	5.25006	1.5205e-07	5.21614e-07	VC_A0864	-	putative Methyl-accepting chemotaxis protein with PAS domains	N, T	CELLULAR PROCESSES AND SIGNALING, CELLULAR PROCESSES AND SIGNALING	Cell motility, Signal transduction mechanisms
VC_2617	569.113	0.58595	0.113353	5.16926	2.35026e-07	7.85924e-07	VC_2617	-	putative Arginine N-succinyltransferase beta subunit	E	METABOLISM	Amino acid transport and metabolism
VC_2483	1404.31	0.585806	0.0974213	6.01312	1.81989e-09	7.36852e-09	VC_2483	ilvI	Acetolactate synthase isozyme 3 large subunit	E, H	METABOLISM, METABOLISM	Amino acid transport and metabolism, Coenzyme transport and metabolism
VC_1424	259.6	0.58569	0.169492	3.45556	0.000549151	0.00122184	VC_1424	potD	Spermidine/putrescine-binding periplasmic protein	E	METABOLISM	Amino acid transport and metabolism
VC_1442	177.871	0.585007	0.184971	3.1627	0.00156314	0.00322022	VC_1442	ctaD	Cytochrome c oxidase subunit 1	O	CELLULAR PROCESSES AND SIGNALING	Posttranslational modification, protein turnover, chaperones
VC_A0591	1265.79	0.584555	0.100781	5.80027	6.62083e-09	2.57578e-08	VC_A0591	-	putative ABC-type peptide transport system, periplasmic component	E	METABOLISM	Amino acid transport and metabolism
VC_A0113	343.714	0.583052	0.149555	3.89858	9.67566e-05	0.000239393	VC_A0113	-	putative Type VI secretion lipoprotein/VasD	S	POORLY CHARACTERIZED	Function unknown
VC_0750	178.85	0.581981	0.166027	3.50535	0.000456011	0.00102667	VC_0750	iscA	Iron-binding protein iscA	S	POORLY CHARACTERIZED	Function unknown
VC_A0497	299.199	0.580146	0.134484	4.31386	1.60429e-05	4.36297e-05	VC_A0497	-	-	-	-	-
VC_0812	157.795	0.578972	0.181966	3.18177	0.00146379	0.00303442	VC_0812	-	putative nuclease fused with helicase	K, L	INFORMATION STORAGE AND PROCESSING, INFORMATION STORAGE AND PROCESSING	Transcription, Replication, recombination and repair
VC_2338	171.386	0.578927	0.16931	3.41933	0.000627763	0.00138052	VC_2338	lacZ	fragment of Beta-galactosidase (part 2)	G	METABOLISM	Carbohydrate transport and metabolism, Carbohydrate transport and metabolism
VC_0065	1791.19	0.577834	0.0933578	6.18945	6.03728e-10	2.54822e-09	VC_0065	thiG	Thiazole synthase	H	METABOLISM	Coenzyme transport and metabolism
VC_0108	213.038	0.576967	0.159262	3.62276	0.000291473	0.000673386	VC_0108	polA	DNA polymerase I	L	INFORMATION STORAGE AND PROCESSING	Replication, recombination and repair
VC_0097	3477.81	0.575674	0.0852221	6.75498	1.42855e-11	6.8764e-11	VC_0097	-	putative Flagellar basal body-associated protein FliL	N	CELLULAR PROCESSES AND SIGNALING	Cell motility
VC_2345	6803.74	0.573982	0.084185	6.81811	9.2246e-12	4.48498e-11	VC_2345	serB	phosphoserine phosphatase	E	METABOLISM	Amino acid transport and metabolism
VC_A0511	128.292	0.573804	0.196822	2.91534	0.00355301	0.00697273	VC_A0511	nrdD	anaerobic ribonucleoside-triphosphate reductase	F	METABOLISM	Nucleotide transport and metabolism
VC_A0233	438.96	0.573611	0.12563	4.56587	4.97423e-06	1.43628e-05	VC_A0233	-	conserved hypothetical protein	S	POORLY CHARACTERIZED	Function unknown
VC_0039	1921.5	0.573116	0.152249	3.76434	0.000166991	0.000398293	VC_0039	-	putative Sporulation stage 0, protein M family protein	R	POORLY CHARACTERIZED	General function prediction only
VC_2259	761.884	0.572819	0.104888	5.46122	4.72884e-08	1.71237e-07	VC_2259	tsf	Elongation factor Ts	J	INFORMATION STORAGE AND PROCESSING	Translation, ribosomal structure and biogenesis
VC_A0991	1690.25	0.570574	0.0944937	6.03823	1.55817e-09	6.34113e-09	VC_A0991	-	putative Transcriptional regulator, LysR family	K	INFORMATION STORAGE AND PROCESSING	Transcription
VC_A0092	684.529	0.570517	0.114275	4.99247	5.9611e-07	1.90067e-06	VC_A0092	-	putative Cob(I)alamin adenosyltransferase	R	POORLY CHARACTERIZED	General function prediction only
VC_2052	301.065	0.569946	0.148985	3.82553	0.000130492	0.000316749	VC_2052	ccmF	Cytochrome c-type biogenesis protein ccmF	O	CELLULAR PROCESSES AND SIGNALING	Posttranslational modification, protein turnover, chaperones
VC_1651	478.208	0.569096	0.174894	3.25395	0.00113814	0.00240066	VC_1651	vieB	Response regulator VieB	K, R, T	INFORMATION STORAGE AND PROCESSING, POORLY CHARACTERIZED, CELLULAR PROCESSES AND SIGNALING	Transcription, General function prediction only, Signal transduction mechanisms
VC_1744	2672.72	0.568083	0.102568	5.53859	3.04908e-08	1.12148e-07	VC_1744	-	-	-	-	-
VC_2177	1642.18	0.567348	0.116593	4.86604	1.13855e-06	3.55327e-06	VC_2177	sirB	Protein sirB2	S	POORLY CHARACTERIZED	Function unknown
VC_2447	11852.7	0.567028	0.0882789	6.42315	1.33483e-10	5.89043e-10	VC_2447	eno	Enolase	G	METABOLISM	Carbohydrate transport and metabolism
VC_0943	355.395	0.566436	0.127409	4.44582	8.75562e-06	2.4533e-05	VC_0943	lipA	Lipoyl synthase	H	METABOLISM	Coenzyme transport and metabolism
VC_A0045	112.711	0.566059	0.199209	2.84154	0.00448969	0.00864036	VC_A0045	-	fragment of putative protease fused with TolB domain (part 2)	M	CELLULAR PROCESSES AND SIGNALING	Cell wall/membrane/envelope biogenesis
VC_0749	324.076	0.564285	0.135657	4.15965	3.18732e-05	8.34285e-05	VC_0749	ISU	Iron sulfur cluster assembly protein 1	C	METABOLISM	Energy production and conversion
VC_1288	1699.21	0.563652	0.111185	5.06951	3.98847e-07	1.29666e-06	VC_1288	-	putative Glucans biosynthesis protein G precursor	P	METABOLISM	Inorganic ion transport and metabolism
VC_2227	1939.81	0.563152	0.123294	4.56754	4.93471e-06	1.42694e-05	VC_2227	purN	phosphoribosylglycinamide formyltransferase	F	METABOLISM	Nucleotide transport and metabolism
VC_2637	925.699	0.563027	0.146289	3.84874	0.000118727	0.000289785	VC_2637	-	Hybrid peroxiredoxin hyPrx5	O	CELLULAR PROCESSES AND SIGNALING	Posttranslational modification, protein turnover, chaperones
VC_1343	1266.53	0.562581	0.134963	4.1684	3.0674e-05	8.06613e-05	VC_1343	-	putative Peptidase M20B, peptidase T	E	METABOLISM	Amino acid transport and metabolism
VC_0423	6668.05	0.561782	0.0928379	6.05122	1.43755e-09	5.8743e-09	VC_0423	arcA	Arginine deiminase	E	METABOLISM	Amino acid transport and metabolism
VC_2180	1048.84	0.561707	0.0974641	5.76322	8.2522e-09	3.17319e-08	VC_2180	hemA	glutamyl tRNA reductase	H	METABOLISM	Coenzyme transport and metabolism
VC_2138	285.216	0.56162	0.143761	3.90663	9.35912e-05	0.00023185	VC_2138	flaJ	Flagellar protein FlaJ	N, O, U	CELLULAR PROCESSES AND SIGNALING, CELLULAR PROCESSES AND SIGNALING, CELLULAR PROCESSES AND SIGNALING	Cell motility, Posttranslational modification, protein turnover, chaperones, Intracellular trafficking, secretion, and vesicular transport
VC_0949	1299.51	0.561327	0.0929294	6.04035	1.53778e-09	6.271e-09	VC_0949	mrdB	Rod shape-determining protein rodA	D	CELLULAR PROCESSES AND SIGNALING	Cell cycle control, cell division, chromosome partitioning
VC_1918	2622.07	0.560904	0.101436	5.52965	3.20875e-08	1.17802e-07	VC_1918	-	putative peptidyl-prolyl cis-trans isomerase (rotamase D)	O	CELLULAR PROCESSES AND SIGNALING	Posttranslational modification, protein turnover, chaperones
VC_0386	1299.42	0.560574	0.13843	4.0495	5.13276e-05	0.000131072	VC_0386	cysH	Phosphoadenosine phosphosulfate reductase	E, H	METABOLISM, METABOLISM	Amino acid transport and metabolism, Coenzyme transport and metabolism
VC_2235	349.72	0.560076	0.14678	3.81576	0.000135763	0.000328543	VC_2235	-	putative S-adenosyl-L-methionine-dependent methyltransferase	Q, R	METABOLISM, POORLY CHARACTERIZED	Secondary metabolites biosynthesis, transport and catabolism, General function prediction only
VC_1632	1200.77	0.560022	0.115435	4.85142	1.22582e-06	3.81069e-06	VC_1632	-	putative nucleoside-diphosphate-sugar epimerase	G, M	METABOLISM, CELLULAR PROCESSES AND SIGNALING	Carbohydrate transport and metabolism, Cell wall/membrane/envelope biogenesis
VC_2014	3942.2	0.558947	0.081247	6.8796	6.00207e-12	2.9645e-11	VC_2014	-	putative Deoxyribonuclease, TatD Mg-dependent	L	INFORMATION STORAGE AND PROCESSING	Replication, recombination and repair
VC_1080	5260.06	0.558507	0.0970664	5.75386	8.72289e-09	3.35094e-08	VC_1080	-	putative Histidine-containing phosphotransfer domain, HPT domain protein	T	CELLULAR PROCESSES AND SIGNALING	Signal transduction mechanisms
VC_2405	662.084	0.557002	0.109244	5.09869	3.42004e-07	1.12195e-06	VC_2405	murF	UDP-N-acetylmuramoyl-tripeptide--D-alanyl-D-alanine ligase	M	CELLULAR PROCESSES AND SIGNALING	Cell wall/membrane/envelope biogenesis
VC_0798	1273.38	0.556366	0.104888	5.30437	1.13061e-07	3.9329e-07	VC_0798	citE	Citrate lyase subunit beta	G	METABOLISM	Carbohydrate transport and metabolism
VC_0615	1595.59	0.556209	0.0909369	6.11643	9.56944e-10	3.97992e-09	VC_0615	-	-	-	-	-
VC_1111	23740.1	0.555303	0.0980543	5.66321	1.48564e-08	5.62027e-08	VC_1111	bioA	Adenosylmethionine-8-amino-7-oxononanoate aminotransferase	H	METABOLISM	Coenzyme transport and metabolism
VC_1122	206.35	0.555021	0.15217	3.64738	0.000264932	0.000614926	VC_1122	-	putative cyclopropane-fatty-acyl-phospholipid synthase	M	CELLULAR PROCESSES AND SIGNALING	Cell wall/membrane/envelope biogenesis
VC_2609	244.098	0.554266	0.150474	3.68347	0.000230081	0.000539069	VC_2609	-	-	-	-	-
VC_2473	201.324	0.552957	0.150761	3.66777	0.000244678	0.000571922	VC_2473	-	-	-	-	-
VC_0020	241.798	0.551261	0.14035	3.92777	8.57373e-05	0.000213994	VC_0020	glyS	Glycyl-tRNA synthetase beta subunit	J	INFORMATION STORAGE AND PROCESSING	Translation, ribosomal structure and biogenesis
VC_A0205	318.229	0.547436	0.134732	4.06315	4.8414e-05	0.00012411	VC_A0205	dcuB	Anaerobic C4-dicarboxylate transporter DcuB	R	POORLY CHARACTERIZED	General function prediction only
VC_0174	462.956	0.546234	0.141648	3.85629	0.000115122	0.000281678	VC_0174	-	putative Sporulation/cell division region protein	I	METABOLISM	Lipid transport and metabolism
VC_A0943	5499.61	0.546185	0.0845556	6.45949	1.05059e-10	4.67243e-10	VC_A0943	malG	Maltose transport system permease protein malG	G	METABOLISM	Carbohydrate transport and metabolism
VC_0964	2810.36	0.54518	0.126856	4.29762	1.72644e-05	4.6696e-05	VC_0964	crr	Glucose-specific phosphotransferase enzyme IIA component	G	METABOLISM	Carbohydrate transport and metabolism
VC_A0064	131.802	0.544772	0.177333	3.07202	0.00212614	0.00429549	VC_A0064	-	putative TonB-dependent heme receptor HutR	P	METABOLISM	Inorganic ion transport and metabolism
VC_A0522	3539.32	0.544517	0.0976691	5.57512	2.47354e-08	9.16569e-08	VC_A0522	cqsS	CAI-1 autoinducer sensor kinase/phosphatase CqsS	T	CELLULAR PROCESSES AND SIGNALING	Signal transduction mechanisms
VC_A0201	668.469	0.543465	0.104407	5.20524	1.93748e-07	6.57287e-07	VC_A0201	-	-	-	-	-
VC_2666	727.481	0.54308	0.112191	4.84065	1.29413e-06	4.00424e-06	VC_2666	-	putative transcriptional regulator	K	INFORMATION STORAGE AND PROCESSING	Transcription
VC_2041	615.233	0.543051	0.110939	4.89504	9.82835e-07	3.08182e-06	VC_2041	-	putative hydrolase of alkaline phosphatase superfamily (sulfatase)	R	POORLY CHARACTERIZED	General function prediction only
VC_t066	810.676	0.542718	0.102689	5.28505	1.25669e-07	4.34866e-07	VC_t066	-	-	-	-	-
VC_1939	273.691	0.542426	0.14121	3.84127	0.0001224	0.000298565	VC_1939	-	Putative threonine/Lysine efflux protein	E	METABOLISM	Amino acid transport and metabolism
VC_1220	1248.88	0.54193	0.115746	4.68207	2.83987e-06	8.44528e-06	VC_1220	pheT	phenylalanine tRNA synthetase, beta subunit	J, R	INFORMATION STORAGE AND PROCESSING, POORLY CHARACTERIZED	Translation, ribosomal structure and biogenesis, General function prediction only
VC_0689	6060.82	0.540196	0.0878516	6.14896	7.79944e-10	3.26427e-09	VC_0689	-	putative NhaP-type Na+/H+ and K+/H+ antiporter	P	METABOLISM	Inorganic ion transport and metabolism
VC_A0860	133.182	0.540106	0.186295	2.89921	0.0037411	0.00729582	VC_A0860	-	putative Periplasmic alpha-amylase	G	METABOLISM	Carbohydrate transport and metabolism
VC_2474	8319.38	0.539247	0.110913	4.86188	1.16278e-06	3.61839e-06	VC_2474	visC	Ubiquinone biosynthesis hydroxylase VisC	C, H	METABOLISM, METABOLISM	Energy production and conversion, Coenzyme transport and metabolism
VC_0255	181.278	0.53904	0.176865	3.04775	0.00230563	0.00462522	VC_0255	-	-	-	-	-
VC_A1046	47691.3	0.53903	0.100108	5.3845	7.26476e-08	2.58592e-07	VC_A1046	mtlD	Mannitol-1-phosphate 5-dehydrogenase	G	METABOLISM	Carbohydrate transport and metabolism
VC_0021	3201.44	0.537596	0.1127	4.77016	1.84081e-06	5.57452e-06	VC_0021	glyQ	Glycyl-tRNA synthetase alpha subunit	J	INFORMATION STORAGE AND PROCESSING	Translation, ribosomal structure and biogenesis
VC_1689	157.695	0.536971	0.178435	3.00933	0.00261823	0.00521547	VC_1689	-	-	-	-	-
VC_2395	2840	0.536595	0.0859626	6.24219	4.31495e-10	1.84278e-09	VC_2395	-	conserved hypothetical protein	S	POORLY CHARACTERIZED	Function unknown
VC_1823	864.943	0.535209	0.101207	5.28826	1.23485e-07	4.2768e-07	VC_1823	frwB	Fructose-like phosphotransferase enzyme IIB component 2	G	METABOLISM	Carbohydrate transport and metabolism
VC_2156	190.08	0.534832	0.171308	3.12205	0.00179595	0.00366754	VC_2156	-	putative Lipoprotein-34 NlpB	M	CELLULAR PROCESSES AND SIGNALING	Cell wall/membrane/envelope biogenesis
VC_2401	369.63	0.53454	0.135255	3.95208	7.74739e-05	0.000194467	VC_2401	murG	UDP-N-acetylglucosamine--N-acetylmuramyl-(pentapeptide) pyrophosphoryl-undecaprenol N-acetylglucosamine transferase	M	CELLULAR PROCESSES AND SIGNALING	Cell wall/membrane/envelope biogenesis
VC_1922	3495.82	0.534367	0.100128	5.33684	9.45779e-08	3.3278e-07	VC_1922	clpP	ATP-dependent Clp protease proteolytic subunit	O, U	CELLULAR PROCESSES AND SIGNALING, CELLULAR PROCESSES AND SIGNALING	Posttranslational modification, protein turnover, chaperones, Intracellular trafficking, secretion, and vesicular transport
VC_0719	248.245	0.534122	0.155455	3.43587	0.000590663	0.0013098	VC_0719	phoB	Phosphate regulon transcriptional regulatory protein phoB	K, T	INFORMATION STORAGE AND PROCESSING, CELLULAR PROCESSES AND SIGNALING	Transcription, Signal transduction mechanisms
VC_0142	255.037	0.533553	0.143146	3.72733	0.000193519	0.000456782	VC_0142	-	-	-	-	-
VC_0175	2534.1	0.532999	0.110487	4.82409	1.40644e-06	4.32818e-06	VC_0175	-	putative deoxycytidylate deaminase-related protein	F	METABOLISM	Nucleotide transport and metabolism
VC_0240	1608.06	0.532977	0.0937681	5.68399	1.31589e-08	5.00189e-08	VC_0240	hldD	ADP-L-glycero-D-manno-heptose-6-epimerase	G, M	METABOLISM, CELLULAR PROCESSES AND SIGNALING	Carbohydrate transport and metabolism, Cell wall/membrane/envelope biogenesis
VC_2616	1458.52	0.532489	0.097353	5.46967	4.50881e-08	1.63717e-07	VC_2616	astD	N-succinylglutamate 5-semialdehyde dehydrogenase	C	METABOLISM	Energy production and conversion
VC_2758	6918.58	0.529704	0.100406	5.27561	1.32316e-07	4.56674e-07	VC_2758	fadB	Fatty acid oxidation complex subunit alpha [Includes: Enoyl-CoA hydratase/Delta(3)-cis-Delta(2)-trans-enoyl-CoA isomerase/3-hydroxybutyryl-CoA epimerase ; 3-hydroxyacyl-CoA dehydrogenase]	I	METABOLISM	Lipid transport and metabolism
VC_1875	589.808	0.529267	0.118253	4.47573	7.61508e-06	2.14734e-05	VC_1875	kdsB	3-deoxy-manno-octulosonate cytidylyltransferase	M	CELLULAR PROCESSES AND SIGNALING	Cell wall/membrane/envelope biogenesis
VC_0008	737.92	0.52899	0.115526	4.57897	4.67261e-06	1.35509e-05	VC_0008	tcyC	L-cystine import ATP-binding protein tcyC	E	METABOLISM	Amino acid transport and metabolism
VC_0139	6180.43	0.528166	0.0849724	6.21574	5.10843e-10	2.16767e-09	VC_0139	dps	DNA protection during starvation protein	P	METABOLISM	Inorganic ion transport and metabolism
VC_0243	35228	0.528073	0.126738	4.16667	3.09085e-05	8.11168e-05	VC_0243	rfbD	GDP-mannose 4,6-dehydratase	M	CELLULAR PROCESSES AND SIGNALING	Cell wall/membrane/envelope biogenesis
VC_0601	653.513	0.527947	0.108152	4.88153	1.05265e-06	3.29813e-06	VC_0601	hrpB	ATP-dependent RNA helicase hrpB	L	INFORMATION STORAGE AND PROCESSING	Replication, recombination and repair
VC_0410	1025.42	0.526013	0.139362	3.77443	0.000160376	0.00038413	VC_0410	mshC	17.3 kDa type 4 prepilin-like protein	N, U	CELLULAR PROCESSES AND SIGNALING, CELLULAR PROCESSES AND SIGNALING	Cell motility, Intracellular trafficking, secretion, and vesicular transport
VC_2381	513.634	0.525819	0.114061	4.60997	4.02735e-06	1.17828e-05	VC_2381	btuF	Vitamin B12 ABC transporter, B12-binding component BtuF	P	METABOLISM	Inorganic ion transport and metabolism
VC_1644	133.997	0.523002	0.183852	2.84469	0.00444546	0.0085594	VC_1644	-	-	-	-	-
VC_0622	1852.52	0.522987	0.109011	4.79754	1.60624e-06	4.90132e-06	VC_0622	-	putative TWO-COMPONENT SENSOR PROTEIN HISTIDINE PROTEIN KINASE	K, T	INFORMATION STORAGE AND PROCESSING, CELLULAR PROCESSES AND SIGNALING	Transcription, Signal transduction mechanisms
VC_0671	234.934	0.522887	0.154373	3.38717	0.000706188	0.00153852	VC_0671	rppH	RNA pyrophosphohydrolase	L, R	INFORMATION STORAGE AND PROCESSING, POORLY CHARACTERIZED	Replication, recombination and repair, General function prediction only
VC_1492	542.226	0.522737	0.122718	4.25966	2.04742e-05	5.48835e-05	VC_1492	gdhB	NAD-specific glutamate dehydrogenase	E	METABOLISM	Amino acid transport and metabolism
VC_2066	6859.58	0.522253	0.0907814	5.75286	8.77464e-09	3.36432e-08	VC_2066	fliA	RNA polymerase sigma factor for flagellar operon	K	INFORMATION STORAGE AND PROCESSING	Transcription
VC_A0815	900.305	0.521959	0.111854	4.66645	3.06453e-06	9.07941e-06	VC_A0815	speA	Biosynthetic arginine decarboxylase	E	METABOLISM	Amino acid transport and metabolism
VC_2545	5402.93	0.520456	0.102056	5.09973	3.40143e-07	1.11677e-06	VC_2545	ppa	inorganic pyrophosphatase	C	METABOLISM	Energy production and conversion
VC_2544	709.298	0.519753	0.120232	4.32291	1.53987e-05	4.20215e-05	VC_2544	fbp	Fructose-1,6-bisphosphatase class 1	G	METABOLISM	Carbohydrate transport and metabolism
VC_1942	1453.96	0.519678	0.0994297	5.22659	1.72666e-07	5.88781e-07	VC_1942	folD	Bifunctional protein folD [Includes: Methylenetetrahydrofolate dehydrogenase ; Methenyltetrahydrofolate cyclohydrolase]	H	METABOLISM	Coenzyme transport and metabolism
VC_A0710	406.394	0.519369	0.124601	4.16824	3.06955e-05	8.06644e-05	VC_A0710	-	Periplasmic protein TorT	G	METABOLISM	Carbohydrate transport and metabolism
VC_A1018	5534.74	0.519299	0.103358	5.02425	5.05403e-07	1.62055e-06	VC_A1018	-	Putative Transcriptional regulator, Ada family/DNA-3-methyladenine glycosylase II	F, L	METABOLISM, INFORMATION STORAGE AND PROCESSING	Nucleotide transport and metabolism, Replication, recombination and repair
VC_2724	1109.98	0.518556	0.0943306	5.49723	3.85814e-08	1.40863e-07	VC_2724	epsM	General secretion pathway protein M	U	CELLULAR PROCESSES AND SIGNALING	Intracellular trafficking, secretion, and vesicular transport
VC_A0043	4654.6	0.516753	0.086408	5.98038	2.22622e-09	8.96802e-09	VC_A0043	-	putative acetyltransferase	R	POORLY CHARACTERIZED	General function prediction only
VC_0221	453.502	0.516304	0.148712	3.47183	0.000516933	0.0011568	VC_0221	mutM	Formamidopyrimidine-DNA glycosylase	L	INFORMATION STORAGE AND PROCESSING	Replication, recombination and repair
VC_0340	850.428	0.515761	0.112119	4.60014	4.22213e-06	1.23073e-05	VC_0340	-	Putative ribosome biogenesis GTPase rsgA	R	POORLY CHARACTERIZED	General function prediction only
VC_1686	14382.4	0.514222	0.0803979	6.39596	1.5954e-10	6.98605e-10	VC_1686	-	-	-	-	-
VC_A0047	507.001	0.513989	0.125452	4.09711	4.18334e-05	0.000107727	VC_A0047	-	putative Multidrug resistance efflux pump	V	CELLULAR PROCESSES AND SIGNALING	Defense mechanisms
VC_1092	845.551	0.512229	0.106067	4.82932	1.37e-06	4.22257e-06	VC_1092	oppB	Oligopeptide transport system permease protein oppB	E, P	METABOLISM, METABOLISM	Amino acid transport and metabolism, Inorganic ion transport and metabolism
VC_1822	963.191	0.511789	0.136708	3.74368	0.000181347	0.000428932	VC_1822	-	putative PTS system fructose-specific IIA/IIB/IIC components	G, T	METABOLISM, CELLULAR PROCESSES AND SIGNALING	Carbohydrate transport and metabolism, Signal transduction mechanisms
VC_1476	1504.93	0.51091	0.0936587	5.45501	4.89696e-08	1.77003e-07	VC_1476	tlcR	TlcR protein	K	INFORMATION STORAGE AND PROCESSING	Transcription
VC_1566	641.637	0.510482	0.121581	4.19872	2.68431e-05	7.10573e-05	VC_1566	-	putative ABC-type antimicrobial peptide transport system, permease component	V	CELLULAR PROCESSES AND SIGNALING	Defense mechanisms
VC_0633	173.886	0.509552	0.160448	3.17582	0.00149416	0.00308933	VC_0633	ompU	Outer membrane protein U	M	CELLULAR PROCESSES AND SIGNALING	Cell wall/membrane/envelope biogenesis
VC_2420	386.592	0.509463	0.135317	3.76495	0.000166579	0.000397551	VC_2420	fldA	flavodoxin	C	METABOLISM	Energy production and conversion
VC_1571	1174.15	0.509445	0.102057	4.99176	5.98314e-07	1.90617e-06	VC_1571	cioA	Cytochrome bd-type quinol oxidase, subunit 1	C	METABOLISM	Energy production and conversion
VC_0672	2699.54	0.509107	0.0884905	5.75324	8.75512e-09	3.36007e-08	VC_0672	ptsP	Phosphoenolpyruvate-protein phosphotransferase ptsP	T	CELLULAR PROCESSES AND SIGNALING	Signal transduction mechanisms
VC_A0114	5247.45	0.508271	0.109027	4.66186	3.13359e-06	9.27711e-06	VC_A0114	-	conserved hypothetical protein	S	POORLY CHARACTERIZED	Function unknown
VC_1093	1677.36	0.507995	0.0976516	5.20211	1.97034e-07	6.67865e-07	VC_1093	oppC	Oligopeptide transport system permease protein oppC	E, P	METABOLISM, METABOLISM	Amino acid transport and metabolism, Inorganic ion transport and metabolism
VC_A0955	720.34	0.507031	0.106827	4.7463	2.07175e-06	6.22621e-06	VC_A0955	-	putative Transcriptional regulator, MarR family	K	INFORMATION STORAGE AND PROCESSING	Transcription
VC_1978	706.281	0.50588	0.115681	4.37308	1.22506e-05	3.37784e-05	VC_1978	yfbR	5'-nucleotidase yfbR	R	POORLY CHARACTERIZED	General function prediction only
VC_A1079	1322.47	0.505727	0.102545	4.93174	8.15e-07	2.57587e-06	VC_A1079	pdxH	pyridoxine 5'-phosphate oxidase	H	METABOLISM	Coenzyme transport and metabolism
VC_A0520	324.592	0.504027	0.159652	3.15703	0.00159386	0.00328013	VC_A0520	-	putative Exonuclease SbcD	L	INFORMATION STORAGE AND PROCESSING	Replication, recombination and repair
VC_1543	1243.75	0.502814	0.105248	4.77742	1.77557e-06	5.3957e-06	VC_1543	-	putative TPR domain protein	R	POORLY CHARACTERIZED	General function prediction only
VC_1509	660.63	0.50264	0.11054	4.54712	5.43853e-06	1.56353e-05	VC_1509	npdA	NAD-dependent deacetylase	K	INFORMATION STORAGE AND PROCESSING	Transcription
VC_A1089	174.341	0.500069	0.163823	3.05249	0.00226953	0.0045597	VC_A1089	cheB	fragment of Chemotaxis response regulator protein-glutamate methylesterase of group 1 operon (part 2)	N, T	CELLULAR PROCESSES AND SIGNALING, CELLULAR PROCESSES AND SIGNALING	Cell motility, Signal transduction mechanisms
VC_1767	260.223	0.499401	0.141411	3.53154	0.00041314	0.000935446	VC_1767	-	conserved hypothetical protein	S	POORLY CHARACTERIZED	Function unknown
VC_2560	4398.4	0.498837	0.0884076	5.64246	1.67635e-08	6.29978e-08	VC_2560	cysD	sulfate adenylyltransferase, subunit 2	E, H	METABOLISM, METABOLISM	Amino acid transport and metabolism, Coenzyme transport and metabolism
VC_1814	546.64	0.497423	0.146366	3.39849	0.000677579	0.00148188	VC_1814	cry1	Cryptochrome DASH	L	INFORMATION STORAGE AND PROCESSING	Replication, recombination and repair
VC_2442	3405.48	0.496651	0.110294	4.50296	6.7015e-06	1.90459e-05	VC_2442	-	putative Phosphate transporter	P	METABOLISM	Inorganic ion transport and metabolism
VC_0078	454.167	0.496593	0.157611	3.15076	0.00162847	0.00334615	VC_0078	ftnA	Ferritin-1	P	METABOLISM	Inorganic ion transport and metabolism
VC_2167	3959.57	0.496016	0.100359	4.94244	7.71523e-07	2.44623e-06	VC_2167	-	conserved hypothetical protein	S	POORLY CHARACTERIZED	Function unknown
VC_t016	294.35	0.495384	0.138231	3.58373	0.000338717	0.000774496	VC_t016	-	-	-	-	-
VC_1525	1427.73	0.494719	0.107477	4.60304	4.16363e-06	1.21457e-05	VC_1525	-	putative ABC-type tungstate transport system, ATP-binding protein	P	METABOLISM	Inorganic ion transport and metabolism
VC_A1092	17518.2	0.494244	0.0976611	5.06081	4.17481e-07	1.35282e-06	VC_A1092	-	putative Methyl-accepting chemotaxis protein III (mcp-III) (ribose and galactose chemoreceptor protein)	N, T	CELLULAR PROCESSES AND SIGNALING, CELLULAR PROCESSES AND SIGNALING	Cell motility, Signal transduction mechanisms
VC_A0168	699.828	0.492624	0.108517	4.53963	5.63543e-06	1.61546e-05	VC_A0168	-	-	-	-	-
VC_2359	1210.97	0.49197	0.164256	2.99515	0.00274313	0.00545061	VC_2359	ung	uracil-DNA-glycosylase	L	INFORMATION STORAGE AND PROCESSING	Replication, recombination and repair
VC_1455	237.692	0.491238	0.15686	3.13169	0.00173803	0.0035584	VC_1455	rstR1	Cryptic phage CTXphi transcriptional repressor rstR	K	INFORMATION STORAGE AND PROCESSING	Transcription
VC_2450	3276.57	0.489746	0.0991438	4.93976	7.82208e-07	2.47419e-06	VC_2450	mazG	Nucleoside triphosphate pyrophosphohydrolase	R	POORLY CHARACTERIZED	General function prediction only
VC_A0055	3788.25	0.488014	0.138343	3.52757	0.000419389	0.000948515	VC_A0055	-	conserved hypothetical protein	S	POORLY CHARACTERIZED	Function unknown
VC_1828	683.973	0.48677	0.107181	4.54157	5.58368e-06	1.6041e-05	VC_1828	-	-	-	-	-
VC_2210	3222.99	0.485452	0.0826435	5.87406	4.25259e-09	1.68242e-08	VC_2210	viuB	Vibriobactin utilization protein viuB	P	METABOLISM	Inorganic ion transport and metabolism
VC_A1083	775.205	0.485187	0.125205	3.87514	0.000106564	0.000261866	VC_A1083	-	fragment of putative GGDEF and EAL domain-containing protein (part 2)	T	CELLULAR PROCESSES AND SIGNALING	Signal transduction mechanisms
VC_1921	4011.28	0.484715	0.0816601	5.93577	2.92472e-09	1.17343e-08	VC_1921	clpX	ATP-dependent Clp protease ATP-binding subunit clpX	O	CELLULAR PROCESSES AND SIGNALING	Posttranslational modification, protein turnover, chaperones
VC_0190	1234.03	0.483405	0.0997109	4.84806	1.24672e-06	3.8666e-06	VC_0190	uvrD	DNA helicase II	L	INFORMATION STORAGE AND PROCESSING	Replication, recombination and repair
VC_A0124	548.632	0.483402	0.121584	3.97586	7.01251e-05	0.00017669	VC_A0124	-	-	-	-	-
VC_1544	2900.21	0.482072	0.117282	4.11037	3.95019e-05	0.000101987	VC_1544	tonB	Ferric siderophore transport system binding protein TonB	M	CELLULAR PROCESSES AND SIGNALING	Cell wall/membrane/envelope biogenesis
VC_A0942	6260.8	0.480998	0.0941194	5.11051	3.21285e-07	1.05747e-06	VC_A0942	-	-	-	-	-
VC_2717	7129.43	0.480697	0.113992	4.21694	2.47638e-05	6.58601e-05	VC_2717	-	-	-	-	-
VC_A0741	583.542	0.479758	0.13613	3.52427	0.000424656	0.000959881	VC_A0741	-	conserved hypothetical protein	S	POORLY CHARACTERIZED	Function unknown
VC_2072	3665.66	0.478532	0.0921601	5.1924	2.076e-07	7.00099e-07	VC_2072	-	putative INSULIN-DEGRADING ENZYME (INSULYSIN) (INSULINASE) (INSULIN PROTEASE)	O	CELLULAR PROCESSES AND SIGNALING	Posttranslational modification, protein turnover, chaperones
VC_2409	2491.11	0.478019	0.095579	5.0013	5.69445e-07	1.81857e-06	VC_2409	mraW	S-adenosyl-L-methionine-dependent methyltransferase mraW	M	CELLULAR PROCESSES AND SIGNALING	Cell wall/membrane/envelope biogenesis
VC_0594	1384.07	0.47615	0.121167	3.92969	8.50551e-05	0.000212424	VC_0594	pcnB	Poly(A) polymerase	J	INFORMATION STORAGE AND PROCESSING	Translation, ribosomal structure and biogenesis
VC_0278	383.38	0.475836	0.126017	3.77596	0.000159393	0.000382005	VC_0278	-	putative Transcriptional regulatory protein	K	INFORMATION STORAGE AND PROCESSING	Transcription
VC_0374	1394.77	0.475414	0.0950792	5.00019	5.72739e-07	1.82762e-06	VC_0374	pgi	Glucose-6-phosphate isomerase	G	METABOLISM	Carbohydrate transport and metabolism
VC_2412	1236.23	0.475224	0.0985867	4.82037	1.43295e-06	4.40295e-06	VC_2412	lpd	Dihydrolipoyl dehydrogenase	C	METABOLISM	Energy production and conversion
VC_2349	702.246	0.474221	0.10623	4.46409	8.04086e-06	2.2594e-05	VC_2349	deoA	Thymidine phosphorylase	F	METABOLISM	Nucleotide transport and metabolism
VC_A1071	201.672	0.474151	0.153839	3.08213	0.00205526	0.00416499	VC_A1071	putP	proline:sodium symporter	E, R	METABOLISM, POORLY CHARACTERIZED	Amino acid transport and metabolism, General function prediction only
VC_1301	799.436	0.472206	0.106461	4.43549	9.18642e-06	2.56497e-05	VC_1301	sdaC	Serine transporter	E	METABOLISM	Amino acid transport and metabolism
VC_0237	1187.76	0.471319	0.104106	4.5273	5.97429e-06	1.70768e-05	VC_0237	-	putative Lipid A core - O-antigen ligase and related enzyme	M	CELLULAR PROCESSES AND SIGNALING	Cell wall/membrane/envelope biogenesis
VC_1201	325.935	0.471026	0.148355	3.175	0.00149837	0.00309642	VC_1201	-	-	-	-	-
VC_1091	451.92	0.468022	0.120137	3.89574	9.79001e-05	0.000241921	VC_1091	oppA	Periplasmic oligopeptide-binding protein	E	METABOLISM	Amino acid transport and metabolism
VC_A0656	444.218	0.468021	0.134943	3.4683	0.000523768	0.00117126	VC_A0656	scrK	Fructokinase	G	METABOLISM	Carbohydrate transport and metabolism
VC_2654	1239.62	0.467252	0.129074	3.62004	0.000294556	0.000679718	VC_2654	yibN	putative rhodanese-related sulfurtransferase	P	METABOLISM	Inorganic ion transport and metabolism
VC_2601	177.055	0.466941	0.166624	2.80236	0.00507305	0.00966944	VC_2601	motX	Sodium-type polar flagellar protein motX	R	POORLY CHARACTERIZED	General function prediction only
VC_1441	322.415	0.466517	0.138883	3.35905	0.000782101	0.00169278	VC_1441	ccoO	Cytochrome c oxidase monoheme subunit	C	METABOLISM	Energy production and conversion
VC_0308	1966.43	0.466345	0.0878849	5.30632	1.11862e-07	3.89458e-07	VC_0308	-	-	-	-	-
VC_1919	400.098	0.465357	0.133977	3.4734	0.000513905	0.00115245	VC_1919	hupB	DNA-binding protein HU-beta	L	INFORMATION STORAGE AND PROCESSING	Replication, recombination and repair
VC_0122	661.775	0.464889	0.105041	4.42579	9.60907e-06	2.67922e-05	VC_0122	cyaA	adenylate cyclase	F	METABOLISM	Nucleotide transport and metabolism
VC_A0917	720.929	0.464783	0.106564	4.36153	1.29157e-05	3.54891e-05	VC_A0917	-	putative Transcriptional regulator LuxT	K	INFORMATION STORAGE AND PROCESSING	Transcription
VC_2615	735.299	0.464779	0.158598	2.93056	0.00338354	0.00666318	VC_2615	-	-	-	-	-
VC_2028	2380.63	0.464149	0.0967078	4.7995	1.59063e-06	4.86489e-06	VC_2028	rluC	Ribosomal large subunit pseudouridine synthase C	J	INFORMATION STORAGE AND PROCESSING	Translation, ribosomal structure and biogenesis
VC_0574	4729.38	0.462548	0.0876497	5.27724	1.31143e-07	4.53019e-07	VC_0574	petB	Cytochrome b	C	METABOLISM	Energy production and conversion
VC_2002	793.037	0.462079	0.106939	4.32096	1.55351e-05	4.23647e-05	VC_2002	-	-	-	-	-
VC_A0387	1383.4	0.460842	0.1015	4.5403	5.6174e-06	1.61146e-05	VC_A0387	-	putative Phosphinothricin acetyltransferase	M	CELLULAR PROCESSES AND SIGNALING	Cell wall/membrane/envelope biogenesis
VC_0683	5228.7	0.460752	0.0917465	5.02201	5.11327e-07	1.63822e-06	VC_0683	lspA	Lipoprotein signal peptidase	M, U	CELLULAR PROCESSES AND SIGNALING, CELLULAR PROCESSES AND SIGNALING	Cell wall/membrane/envelope biogenesis, Intracellular trafficking, secretion, and vesicular transport
VC_0182	943.05	0.460666	0.113633	4.05397	5.0356e-05	0.000128839	VC_0182	-	putative coiled-coil protein	D	CELLULAR PROCESSES AND SIGNALING	Cell cycle control, cell division, chromosome partitioning
VC_A0344	1075.23	0.46025	0.100918	4.56064	5.09968e-06	1.47037e-05	VC_A0344	-	-	-	-	-
VC_1688	2239.53	0.459556	0.0861647	5.33345	9.63615e-08	3.38158e-07	VC_1688	-	-	-	-	-
VC_A0288	7666.59	0.45705	0.0884756	5.16583	2.39369e-07	7.99103e-07	VC_A0288	infC	initiation factor IF3	J	INFORMATION STORAGE AND PROCESSING	Translation, ribosomal structure and biogenesis
VC_1033	546.564	0.456298	0.117872	3.87115	0.000108324	0.000266027	VC_1033	zntA	Lead, cadmium, zinc and mercury-transporting ATPase	P	METABOLISM	Inorganic ion transport and metabolism
VC_A0798	1425.89	0.455392	0.136785	3.32925	0.000870792	0.00187555	VC_A0798	-	putative phosphatase/phosphohexomutase	R	POORLY CHARACTERIZED	General function prediction only
VC_2642	1075.96	0.454984	0.115774	3.92994	8.49687e-05	0.000212342	VC_2642	argG	Argininosuccinate synthase (Citrulline--aspartate ligase)	E	METABOLISM	Amino acid transport and metabolism
VC_A0156	448.89	0.454341	0.118545	3.83265	0.000126771	0.000308472	VC_A0156	-	putative Na(+) H(+) antiporter subunit C	P	METABOLISM	Inorganic ion transport and metabolism
VC_0220	1991.61	0.454116	0.0961272	4.72412	2.31117e-06	6.93003e-06	VC_0220	-	-	-	-	-
VC_0035	3859.06	0.453876	0.0914238	4.96452	6.88708e-07	2.19064e-06	VC_0035	rdoA	putative Aminoglycoside phosphotransferase	R	POORLY CHARACTERIZED	General function prediction only
VC_A0229	4624.09	0.453184	0.113405	3.99616	6.43771e-05	0.000163138	VC_A0229	-	putative Ferric vibriobactin, enterobactin transport system, permease protein VctG/ABC transporter involved in vitamin B12	P	METABOLISM	Inorganic ion transport and metabolism
VC_2626	2939.91	0.451606	0.0853955	5.2884	1.23391e-07	4.2768e-07	VC_2626	dam	DNA adenine methylase	L	INFORMATION STORAGE AND PROCESSING	Replication, recombination and repair
VC_A0119	373.63	0.451163	0.132351	3.40885	0.000652381	0.0014307	VC_A0119	-	putative type VI secretion-associated protein with ImpA-related N-terminal domain	S	POORLY CHARACTERIZED	Function unknown
VC_1409	2412.02	0.449318	0.0893918	5.02639	4.99795e-07	1.60516e-06	VC_1409	-	putative RND efflux system, outer membrane lipoprotein, NodT	M, U	CELLULAR PROCESSES AND SIGNALING, CELLULAR PROCESSES AND SIGNALING	Cell wall/membrane/envelope biogenesis, Intracellular trafficking, secretion, and vesicular transport
VC_0330	902.056	0.446652	0.10529	4.2421	2.21436e-05	5.91686e-05	VC_0330	-	putative Regulator of RNA polymerase sigma(70) subunit, Rsd/AlgQ	K	INFORMATION STORAGE AND PROCESSING	Transcription
VC_1125	1133.96	0.445923	0.101194	4.40662	1.04998e-05	2.91328e-05	VC_1125	-	-	-	-	-
VC_2380	1731.63	0.445314	0.0932141	4.77733	1.7764e-06	5.3957e-06	VC_2380	-	putative Cobalamin biosynthesis protein CobD/CbiB	H	METABOLISM	Coenzyme transport and metabolism
VC_A0262	2979.7	0.44312	0.0966213	4.58616	4.51474e-06	1.31218e-05	VC_A0262	-	-	-	-	-
VC_2542	606.868	0.442081	0.112886	3.91616	8.99721e-05	0.000223581	VC_2542	mpl	UDP-N-acetylmuramate:L-alanyl-gamma-D-glutamyl-meso-diaminopimelate ligase	M	CELLULAR PROCESSES AND SIGNALING	Cell wall/membrane/envelope biogenesis
VC_0908	998.713	0.441734	0.0994821	4.44033	8.98197e-06	2.51318e-05	VC_0908	gmhB	D,D-heptose 1,7-bisphosphate phosphatase	E	METABOLISM	Amino acid transport and metabolism
VC_A0607	1843.9	0.441659	0.0983486	4.49075	7.09716e-06	2.00985e-05	VC_A0607	rnk	Regulator of nucleoside diphosphate kinase	K	INFORMATION STORAGE AND PROCESSING	Transcription
VC_1515	44129.6	0.440802	0.09533	4.62396	3.76484e-06	1.10391e-05	VC_1515	-	Putative chaperone	R	POORLY CHARACTERIZED	General function prediction only
VC_0054	352.291	0.440385	0.139063	3.16679	0.0015413	0.00317689	VC_0054	rimN	Putative ribosome maturation factor rimN	J	INFORMATION STORAGE AND PROCESSING	Translation, ribosomal structure and biogenesis
VC_0608	4679.78	0.440292	0.0908272	4.84758	1.24976e-06	3.87298e-06	VC_0608	fbpA	Iron binding protein FbpA	P	METABOLISM	Inorganic ion transport and metabolism
VC_2606	4283.59	0.439574	0.0825343	5.32595	1.00425e-07	3.51222e-07	VC_2606	kefB	Glutathione-regulated potassium-efflux system protein kefB	P	METABOLISM	Inorganic ion transport and metabolism
VC_1620	4570.64	0.439211	0.101795	4.31466	1.59847e-05	4.35011e-05	VC_1620	-	conserved protein of unknown function	Q, U, W	METABOLISM, CELLULAR PROCESSES AND SIGNALING, CELLULAR PROCESSES AND SIGNALING	Secondary metabolites biosynthesis, transport and catabolism, Intracellular trafficking, secretion, and vesicular transport, Extracellular structures
VC_0581	31976.8	0.437607	0.0867821	5.0426	4.59256e-07	1.48094e-06	VC_0581	-	putative lipoprotein	R	POORLY CHARACTERIZED	General function prediction only
VC_1715	523.041	0.437113	0.113408	3.85435	0.000116039	0.000283572	VC_1715	mukE	Chromosome partition protein mukE	D	CELLULAR PROCESSES AND SIGNALING	Cell cycle control, cell division, chromosome partitioning
VC_1664	16035.4	0.435659	0.0839239	5.19112	2.09027e-07	7.03634e-07	VC_1664	-	putative ABC-type uncharacterized transport system, periplasmic component	R	POORLY CHARACTERIZED	General function prediction only
VC_1215	598.567	0.435306	0.113857	3.82325	0.000131703	0.000319495	VC_1215	pgsA	CDP-diacylglycerol--glycerol-3-phosphate 3-phosphatidyltransferase	I	METABOLISM	Lipid transport and metabolism
VC_A0983	13758.3	0.434791	0.0944388	4.60394	4.14567e-06	1.21022e-05	VC_A0983	-	putative L-lactate permease	C	METABOLISM	Energy production and conversion
VC_1479	2323.33	0.434543	0.134645	3.22733	0.00124951	0.00261891	VC_1479	-	-	-	-	-
VC_1573	886.6	0.433953	0.11557	3.75489	0.00017342	0.000411408	VC_1573	fumC	Fumarate hydratase class II 1	C	METABOLISM	Energy production and conversion
VC_A0829	2112.55	0.433572	0.0877465	4.9412	7.76449e-07	2.45989e-06	VC_A0829	acsA	Acetoacetyl-coenzyme A synthetase	I	METABOLISM	Lipid transport and metabolism
VC_A0659	926.656	0.431908	0.106354	4.06104	4.88549e-05	0.000125159	VC_A0659	-	putative outer membrane protein	M	CELLULAR PROCESSES AND SIGNALING	Cell wall/membrane/envelope biogenesis
VC_0873	1073.41	0.430795	0.12585	3.42308	0.000619169	0.00136389	VC_0873	-	conserved hypothetical protein	S	POORLY CHARACTERIZED	Function unknown
VC_A0516	32985.4	0.430403	0.117353	3.66761	0.000244832	0.000571946	VC_A0516	fruA	PTS system fructose-specific EIIBC component [Includes: Fructose-specific phosphotransferase enzyme IIB component ; Fructose permease IIC component]	G	METABOLISM	Carbohydrate transport and metabolism
VC_0889	222.796	0.42913	0.152621	2.81174	0.00492742	0.00940991	VC_0889	dxs	1-deoxy-D-xylulose-5-phosphate synthase	H, I	METABOLISM, METABOLISM	Coenzyme transport and metabolism, Lipid transport and metabolism
VC_2027	1060.7	0.427866	0.1077	3.97275	7.10475e-05	0.000178675	VC_2027	-	putative Maf-like protein	D	CELLULAR PROCESSES AND SIGNALING	Cell cycle control, cell division, chromosome partitioning
VC_A0770	335.321	0.427733	0.132681	3.22377	0.00126516	0.0026503	VC_A0770	-	-	-	-	-
VC_A0100	213.601	0.427378	0.147166	2.90406	0.00368361	0.00720414	VC_A0100	-	putative Phage shock protein E or Rhodanese-related sulfurtransferase	P	METABOLISM	Inorganic ion transport and metabolism
VC_0302	845.459	0.426343	0.111416	3.82658	0.000129938	0.000315598	VC_0302	-	putative 3-phenylpropionic acid transporter	E, G, P, R	METABOLISM, METABOLISM, METABOLISM, POORLY CHARACTERIZED	Amino acid transport and metabolism, Carbohydrate transport and metabolism, Inorganic ion transport and metabolism, General function prediction only
VC_1820	6289.59	0.425696	0.0848324	5.01809	5.21889e-07	1.66937e-06	VC_1820	-	putative PTS system, fructose/mannitol specific IIA subunit	G, T	METABOLISM, CELLULAR PROCESSES AND SIGNALING	Carbohydrate transport and metabolism, Signal transduction mechanisms
VC_2179	4503.42	0.423261	0.102183	4.14218	3.44027e-05	8.95192e-05	VC_2179	prfA	Peptide chain release factor 1	J	INFORMATION STORAGE AND PROCESSING	Translation, ribosomal structure and biogenesis
VC_2658	222.552	0.422994	0.147942	2.8592	0.00424714	0.00820138	VC_2658	frdC	Fumarate reductase subunit C	C	METABOLISM	Energy production and conversion
VC_1297	784.511	0.422797	0.108199	3.90758	9.32253e-05	0.000231087	VC_1297	asnS	Asparaginyl-tRNA synthetase	J	INFORMATION STORAGE AND PROCESSING	Translation, ribosomal structure and biogenesis
VC_2452	1277.86	0.421618	0.0978435	4.3091	1.63918e-05	4.44873e-05	VC_2452	rumA	23S rRNA (uracil-5-)-methyltransferase rumA	J	INFORMATION STORAGE AND PROCESSING	Translation, ribosomal structure and biogenesis
VC_1314	8618.53	0.420938	0.087218	4.82628	1.3911e-06	4.28429e-06	VC_1314	-	putative Sodium/sulphate symporter	P	METABOLISM	Inorganic ion transport and metabolism
VC_0526	1251.33	0.4194	0.0973638	4.30756	1.65066e-05	4.47378e-05	VC_0526	-	putative Bacitracin resistance protein BacA (Undecaprenyl-diphosphatase)	V	CELLULAR PROCESSES AND SIGNALING	Defense mechanisms
VC_A0764	669.002	0.417401	0.106817	3.90762	9.32095e-05	0.000231087	VC_A0764	-	putative ADP-ribose pyrophosphatase	L, R	INFORMATION STORAGE AND PROCESSING, POORLY CHARACTERIZED	Replication, recombination and repair, General function prediction only
VC_1636	12399.7	0.416679	0.119888	3.47556	0.00050979	0.00114386	VC_1636	-	putative DNA or RNA helicase of superfamily II	J, K, L	INFORMATION STORAGE AND PROCESSING, INFORMATION STORAGE AND PROCESSING, INFORMATION STORAGE AND PROCESSING	Translation, ribosomal structure and biogenesis, Transcription, Replication, recombination and repair
VC_2049	2204.47	0.416118	0.11145	3.73366	0.000188721	0.000445843	VC_2049	ccmI	Cytochrome c-type biogenesis protein CcmI	O	CELLULAR PROCESSES AND SIGNALING	Posttranslational modification, protein turnover, chaperones
VC_A0034	4414.03	0.415767	0.088456	4.70027	2.59815e-06	7.75544e-06	VC_A0034	-	putative signal transduction protein	T	CELLULAR PROCESSES AND SIGNALING	Signal transduction mechanisms
VC_1624	2631.19	0.415692	0.0860242	4.83227	1.34983e-06	4.16362e-06	VC_1624	-	putative saccharopine dehydrogenase	E	METABOLISM	Amino acid transport and metabolism
VC_1296	751.244	0.415224	0.104038	3.99108	6.57738e-05	0.000166465	VC_1296	thiD	Hydroxymethylpyrimidine/phosphomethylpyrimidine kinase	H	METABOLISM	Coenzyme transport and metabolism
VC_2730	306.817	0.414754	0.14275	2.90546	0.00366713	0.00717544	VC_2730	epsG	General secretion pathway protein G	N, U	CELLULAR PROCESSES AND SIGNALING, CELLULAR PROCESSES AND SIGNALING	Cell motility, Intracellular trafficking, secretion, and vesicular transport
VC_0985	7342.4	0.413801	0.128611	3.21746	0.00129329	0.00270353	VC_0985	htpG	Chaperone protein htpG	O	CELLULAR PROCESSES AND SIGNALING	Posttranslational modification, protein turnover, chaperones
VC_A0938	1160.09	0.412613	0.0984803	4.1898	2.79206e-05	7.36645e-05	VC_A0938	-	protein of unknown function	E, G, R	METABOLISM, POORLY CHARACTERIZED	Amino acid transport and metabolism, Carbohydrate transport and metabolism, General function prediction only
VC_2217	7022.62	0.41254	0.0969803	4.25385	2.10126e-05	5.62222e-05	VC_2217	chb	N,N'-diacetylchitobiase	G	METABOLISM	Carbohydrate transport and metabolism
VC_A0044	2741.44	0.412366	0.0847796	4.86398	1.15051e-06	3.58498e-06	VC_A0044	-	fragment of putative protease fused with TolB domain (part 1)	S, U	POORLY CHARACTERIZED, CELLULAR PROCESSES AND SIGNALING	Function unknown, Intracellular trafficking, secretion, and vesicular transport
VC_2368	321.603	0.412167	0.136672	3.01575	0.00256348	0.00511409	VC_2368	arcA	Aerobic respiration control protein arcA	K, T	INFORMATION STORAGE AND PROCESSING, CELLULAR PROCESSES AND SIGNALING	Transcription, Signal transduction mechanisms
VC_2511	3913.83	0.411734	0.0820229	5.01975	5.17394e-07	1.65633e-06	VC_2511	pyrI	Aspartate carbamoyltransferase regulatory chain	F	METABOLISM	Nucleotide transport and metabolism
VC_2185	1232.49	0.410814	0.107855	3.80894	0.000139564	0.00033733	VC_2185	engD	GTP-dependent nucleic acid-binding protein engD	J	INFORMATION STORAGE AND PROCESSING	Translation, ribosomal structure and biogenesis
VC_A0689	742.11	0.410313	0.108963	3.76561	0.000166146	0.000396992	VC_A0689	-	-	-	-	-
VC_0245	596.321	0.409559	0.115161	3.5564	0.00037597	0.000855182	VC_0245	rfbG	putative UDP-Glycosyltransferase/glycogen phosphorylase	M	CELLULAR PROCESSES AND SIGNALING	Cell wall/membrane/envelope biogenesis
VC_1737	1042.29	0.409493	0.0987344	4.14742	3.36244e-05	8.7574e-05	VC_1737	infA	translation initiation factor IF-1	J	INFORMATION STORAGE AND PROCESSING	Translation, ribosomal structure and biogenesis
VC_2423	2185.7	0.409297	0.133278	3.07101	0.00213335	0.00430787	VC_2423	pilA	Fimbrial protein	N, U	CELLULAR PROCESSES AND SIGNALING, CELLULAR PROCESSES AND SIGNALING	Cell motility, Intracellular trafficking, secretion, and vesicular transport
VC_A0563	1494.36	0.406875	0.101616	4.00403	6.2273e-05	0.000158108	VC_A0563	pntA	NAD(P) transhydrogenase subunit alpha	C	METABOLISM	Energy production and conversion
VC_A0907	1948.64	0.405388	0.0935919	4.33144	1.48137e-05	4.05084e-05	VC_A0907	hugZ	Heme utilization protein	P	METABOLISM	Inorganic ion transport and metabolism
VC_2039	6897.59	0.405194	0.126972	3.19122	0.00141675	0.00294305	VC_2039	ndpA	Nucleoid-associated protein ndpA	R	POORLY CHARACTERIZED	General function prediction only
VC_2400	2039.15	0.405129	0.107473	3.76958	0.000163521	0.000391191	VC_2400	murC	UDP-N-acetylmuramate--L-alanine ligase	M	CELLULAR PROCESSES AND SIGNALING	Cell wall/membrane/envelope biogenesis
VC_2234	958.304	0.40464	0.110811	3.65161	0.0002606	0.000605579	VC_2234	rnhA	ribonuclease HI	L	INFORMATION STORAGE AND PROCESSING	Replication, recombination and repair
VC_A0572	5804.38	0.403487	0.0899129	4.48753	7.20528e-06	2.03902e-05	VC_A0572	-	putative D-alanine--D-alanine ligase	M	CELLULAR PROCESSES AND SIGNALING	Cell wall/membrane/envelope biogenesis
VC_2181	2963.46	0.402462	0.103645	3.88308	0.000103143	0.000254087	VC_2181	-	putative lipoprotein lolB	M	CELLULAR PROCESSES AND SIGNALING	Cell wall/membrane/envelope biogenesis
VC_1959	1524.66	0.40235	0.0910729	4.41789	9.96707e-06	2.77126e-05	VC_1959	minC	Septum site-determining protein minC	D	CELLULAR PROCESSES AND SIGNALING	Cell cycle control, cell division, chromosome partitioning
VC_0277	1129.86	0.400493	0.102258	3.91649	8.98486e-05	0.000223413	VC_0277	zntR	zinc-responsive transcriptional regulator	K	INFORMATION STORAGE AND PROCESSING	Transcription
VC_2618	324.385	0.398775	0.136823	2.91453	0.00356229	0.00698751	VC_2618	argD	acetylornithine aminotransferase, succinylornithine transaminase, succinyldiaminopimelate transaminase	E	METABOLISM	Amino acid transport and metabolism
VC_1546	2915.2	0.398207	0.0897359	4.43754	9.09925e-06	2.54242e-05	VC_1546	exbB2	Biopolymer transport protein ExbB2	U	CELLULAR PROCESSES AND SIGNALING	Intracellular trafficking, secretion, and vesicular transport
VC_A0688	7879.25	0.398147	0.111427	3.57318	0.000352677	0.000804039	VC_A0688	phaC	PHA synthase (Polyhydroxyalkanoic acid synthase)	I	METABOLISM	Lipid transport and metabolism
VC_A0769	1353.79	0.39708	0.121866	3.25834	0.00112068	0.00236759	VC_A0769	-	putative Acyl carrier protein phosphodiesterase	S	POORLY CHARACTERIZED	Function unknown
VC_1363	1544.98	0.396777	0.114715	3.45881	0.000542558	0.0012092	VC_1363	-	putative Siroheme synthase component enzyme fused with Uroporphyrinogen-III methylase	H	METABOLISM	Coenzyme transport and metabolism
VC_A0118	932.111	0.394712	0.106644	3.70121	0.000214576	0.000504826	VC_A0118	-	-	-	-	-
VC_0698	314.843	0.394025	0.137959	2.85609	0.00428887	0.00827793	VC_0698	-	putative ABC transporter ATP-binding protein	R	POORLY CHARACTERIZED	General function prediction only
VC_A0213	2224.29	0.389783	0.105482	3.69526	0.000219659	0.00051526	VC_A0213	-	putative Na+/H+ antiporter	C	METABOLISM	Energy production and conversion
VC_A0020	1777.43	0.38975	0.0963753	4.04408	5.25286e-05	0.000134052	VC_A0020	-	-	-	-	-
VC_A0318	699.504	0.389382	0.107711	3.61507	0.000300262	0.00069128	VC_A0318	-	Plasmid stabilization system 318 protein (Toxin protein of TA system 318-319)	K, R	INFORMATION STORAGE AND PROCESSING, POORLY CHARACTERIZED	Transcription, General function prediction only
VC_2463	4640.88	0.38862	0.0840217	4.62523	3.74175e-06	1.09795e-05	VC_2463	lepA	GTP-binding protein lepA	M	CELLULAR PROCESSES AND SIGNALING	Cell wall/membrane/envelope biogenesis
VC_2111	1654.38	0.388033	0.0935616	4.14736	3.36332e-05	8.7574e-05	VC_2111	-	putative NAD(P)H-dependent FMN reductase	R	POORLY CHARACTERIZED	General function prediction only
VC_1275	701.898	0.387412	0.132743	2.9185	0.00351716	0.00691261	VC_1275	-	putative TRAP-type C4-dicarboxylate transport system, large permease component DctM subunit	Q	METABOLISM	Secondary metabolites biosynthesis, transport and catabolism
VC_0817	1520.86	0.386424	0.0928895	4.16005	3.18184e-05	8.33399e-05	VC_0817	-	putative integrase	L	INFORMATION STORAGE AND PROCESSING	Replication, recombination and repair
VC_A0053	4687.8	0.386107	0.0845371	4.56732	4.9401e-06	1.42746e-05	VC_A0053	deoD	Purine nucleoside phosphorylase deoD-type	F	METABOLISM	Nucleotide transport and metabolism
VC_1652	442.16	0.385875	0.120997	3.18912	0.00142708	0.00296141	VC_1652	vieA	Response regulator VieA	K, T	INFORMATION STORAGE AND PROCESSING, CELLULAR PROCESSES AND SIGNALING	Transcription, Signal transduction mechanisms
VC_2419	4522.01	0.385378	0.0897278	4.29497	1.74718e-05	4.71929e-05	VC_2419	xerD	Tyrosine recombinase xerD	L	INFORMATION STORAGE AND PROCESSING	Replication, recombination and repair
VC_0412	1609.47	0.383798	0.0904921	4.24123	2.223e-05	5.93595e-05	VC_0412	mshO	conserved hypothetical protein	N, U	CELLULAR PROCESSES AND SIGNALING, CELLULAR PROCESSES AND SIGNALING	Cell motility, Intracellular trafficking, secretion, and vesicular transport
VC_A0200	1364.68	0.38276	0.105829	3.61677	0.000298299	0.000687322	VC_A0200	-	conserved hypothetical protein	L, S	INFORMATION STORAGE AND PROCESSING, POORLY CHARACTERIZED	Replication, recombination and repair, Function unknown
VC_0789	686.027	0.380455	0.112762	3.37396	0.000740954	0.00161073	VC_0789	-	-	-	-	-
VC_2460	987.694	0.377346	0.111111	3.39611	0.000683502	0.00149319	VC_2460	era	GTP-binding protein era	R	POORLY CHARACTERIZED	General function prediction only
VC_1300	1593.91	0.377202	0.0907435	4.15679	3.22747e-05	8.43129e-05	VC_1300	sdaA	L-serine dehydratase 1	E	METABOLISM	Amino acid transport and metabolism
VC_1170	1403.78	0.371977	0.103881	3.58081	0.000342536	0.000781815	VC_1170	trpB	Tryptophan synthase beta chain 1	E	METABOLISM	Amino acid transport and metabolism
VC_A0999	431.977	0.371933	0.124477	2.98797	0.00280838	0.00556358	VC_A0999	-	putative Transcriptional regulator TetR family	K	INFORMATION STORAGE AND PROCESSING	Transcription
VC_2451	13682.2	0.371211	0.109058	3.40379	0.000664586	0.00145667	VC_2451	relA	GTP pyrophosphokinase	K, T	INFORMATION STORAGE AND PROCESSING, CELLULAR PROCESSES AND SIGNALING	Transcription, Signal transduction mechanisms
VC_0213	10601.3	0.370588	0.123386	3.00349	0.00266902	0.00531397	VC_0213	htrB	Lipid A biosynthesis lauroyl acyltransferase	M	CELLULAR PROCESSES AND SIGNALING	Cell wall/membrane/envelope biogenesis
VC_1438	12176.7	0.370341	0.10235	3.61838	0.000296453	0.000683699	VC_1438	-	Putative analog of CcoH	S	POORLY CHARACTERIZED	Function unknown
VC_A0258	635.659	0.369456	0.108331	3.41043	0.000648594	0.00142318	VC_A0258	-	putative Hemolysin	S	POORLY CHARACTERIZED	Function unknown
VC_0745	421.279	0.369113	0.117914	3.13035	0.00174599	0.00357285	VC_0745	suhB	Inositol-1-monophosphatase	G	METABOLISM	Carbohydrate transport and metabolism
VC_A0573	515.785	0.368666	0.115083	3.20349	0.00135771	0.00283075	VC_A0573	-	putative DamX-related protein	S	POORLY CHARACTERIZED	Function unknown
VC_2404	1514.12	0.366413	0.0959662	3.81815	0.000134456	0.000325776	VC_2404	mraY	phospho-N-acetylmuramoyl-pentapeptide transferase	M	CELLULAR PROCESSES AND SIGNALING	Cell wall/membrane/envelope biogenesis
VC_1068	2225.91	0.36448	0.084496	4.31357	1.60636e-05	4.36561e-05	VC_1068	arsR	Arsenical resistance operon repressor	K	INFORMATION STORAGE AND PROCESSING	Transcription
VC_0636	417.35	0.363804	0.128216	2.83742	0.00454796	0.00874406	VC_0636	rrmJ	Ribosomal RNA large subunit methyltransferase E	J	INFORMATION STORAGE AND PROCESSING	Translation, ribosomal structure and biogenesis
VC_0717	3966.43	0.363669	0.0872661	4.16736	3.08154e-05	8.0926e-05	VC_0717	-	putative Peptidase U32	O	CELLULAR PROCESSES AND SIGNALING	Posttranslational modification, protein turnover, chaperones
VC_1431	1021.9	0.363045	0.106317	3.41473	0.000638448	0.00140247	VC_1431	-	-	-	-	-
VC_A0649	545.333	0.362763	0.116828	3.10509	0.00190219	0.00387057	VC_A0649	-	-	-	-	-
VC_1618	1570.64	0.362476	0.0958493	3.78172	0.000155746	0.000373715	VC_1618	-	putative Permease of the major facilitator superfamily	E, G, P, R	METABOLISM, METABOLISM, METABOLISM, POORLY CHARACTERIZED	Amino acid transport and metabolism, Carbohydrate transport and metabolism, Inorganic ion transport and metabolism, General function prediction only
VC_1682	1531.67	0.361501	0.106272	3.40167	0.000669749	0.00146717	VC_1682	sapC	Peptide transport system permease protein sapC	V	CELLULAR PROCESSES AND SIGNALING	Defense mechanisms
VC_A1004	8397.62	0.360135	0.086685	4.15453	3.25963e-05	8.50412e-05	VC_A1004	-	putative FUMARYLACETOACETATE HYDROLASE/2-keto-4-pentenoate hydratase	Q	METABOLISM	Secondary metabolites biosynthesis, transport and catabolism
VC_0678	54017.5	0.359741	0.087228	4.12414	3.72124e-05	9.65774e-05	VC_0678	hlyU	transcription activator HlyU	K	INFORMATION STORAGE AND PROCESSING	Transcription
VC_1480	824.031	0.359128	0.103442	3.47178	0.000517011	0.0011568	VC_1480	-	-	-	-	-
VC_0093	548.655	0.358928	0.114588	3.13233	0.00173424	0.00355247	VC_0093	plsB	Glycerol-3-phosphate acyltransferase	I	METABOLISM	Lipid transport and metabolism
VC_2541	15084.3	0.358466	0.0934028	3.83785	0.000124117	0.000302569	VC_2541	ubiX	3-polyprenyl-4-hydroxybenzoate carboxy-lyase UbiX	H	METABOLISM	Coenzyme transport and metabolism
VC_2289	390.289	0.357909	0.125663	2.84816	0.00439732	0.00847491	VC_2289	apbE	thiamin biosynthesis lipoprotein ApbE	H	METABOLISM	Coenzyme transport and metabolism
VC_0521	394.869	0.357623	0.123354	2.89917	0.00374149	0.00729582	VC_0521	gcp	O-sialoglycoprotein endopeptidase	O	CELLULAR PROCESSES AND SIGNALING	Posttranslational modification, protein turnover, chaperones
VC_A0954	883.511	0.356363	0.106442	3.34794	0.00081415	0.00175736	VC_A0954	-	putative chemotaxis protein CheV	N, T	CELLULAR PROCESSES AND SIGNALING, CELLULAR PROCESSES AND SIGNALING	Cell motility, Signal transduction mechanisms
VC_0667	1334.73	0.356183	0.097712	3.64523	0.000267148	0.000619709	VC_0667	tas	putative aldo/keto reductase 2 family protein	C	METABOLISM	Energy production and conversion
VC_2559	8899.8	0.35438	0.103346	3.42905	0.000605693	0.00133791	VC_2559	cysN	sulfate adenylyltransferase, subunit 1	P	METABOLISM	Inorganic ion transport and metabolism
VC_0125	603.954	0.353004	0.110646	3.19039	0.00142082	0.00294996	VC_0125	lysA	Diaminopimelate decarboxylase	E	METABOLISM	Amino acid transport and metabolism
VC_0436	4179.71	0.35224	0.0962758	3.65866	0.000253538	0.000589513	VC_0436	rpmA	50S ribosomal subunit protein L27	J	INFORMATION STORAGE AND PROCESSING	Translation, ribosomal structure and biogenesis
VC_1950	2311.97	0.35157	0.0881021	3.99049	6.5937e-05	0.000166772	VC_1950	torZ	Trimethylamine-N-oxide reductase 2	C	METABOLISM	Energy production and conversion
VC_A0751	1948.96	0.350766	0.10115	3.46779	0.000524748	0.00117279	VC_A0751	fabHA	3-oxoacyl-[acyl-carrier-protein] synthase 3 protein 1	I	METABOLISM	Lipid transport and metabolism
VC_0364	1226.61	0.34863	0.102655	3.39612	0.000683493	0.00149319	VC_0364	bfd	Bacterioferritin-associated ferredoxin	P	METABOLISM	Inorganic ion transport and metabolism
VC_1975	588.459	0.347768	0.122743	2.83331	0.00460687	0.00884876	VC_1975	-	putative 2-succinyl-5-enolpyruvyl-6-hydroxy-3-cyclohexene-1-carboxylate synthase MenD	H	METABOLISM	Coenzyme transport and metabolism
VC_0755	1099.4	0.347682	0.0991705	3.5059	0.000455071	0.00102513	VC_0755	pepB	Peptidase B	E	METABOLISM	Amino acid transport and metabolism
VC_2659	691.089	0.346286	0.106016	3.26636	0.00108941	0.00230766	VC_2659	frdD	Fumarate reductase subunit D	C	METABOLISM	Energy production and conversion
VC_2030	764.249	0.345872	0.106137	3.25874	0.00111907	0.00236545	VC_2030	rne	Ribonuclease E	J	INFORMATION STORAGE AND PROCESSING	Translation, ribosomal structure and biogenesis
VC_2036	1220.07	0.34528	0.0931752	3.70571	0.000210799	0.000496233	VC_2036	asd	Aspartate-semialdehyde dehydrogenase	E	METABOLISM	Amino acid transport and metabolism
VC_2723	588.171	0.34319	0.114509	2.99706	0.00272594	0.00541917	VC_2723	-	-	-	-	-
VC_A0242	15696.2	0.342558	0.0991899	3.45356	0.000553237	0.00122955	VC_A0242	sgbH	3-keto-L-gulonate-6-phosphate decarboxylase sgbH	G	METABOLISM	Carbohydrate transport and metabolism
VC_A0244	5248.51	0.341671	0.0855922	3.99185	6.55602e-05	0.00016603	VC_A0244	ulaF	L-ribulose-5-phosphate 4-epimerase UlaF	G	METABOLISM	Carbohydrate transport and metabolism
VC_0653	5602.73	0.339652	0.0842073	4.03352	5.4948e-05	0.000140137	VC_0653	-	putative EAL,GGDEF and PAS domains carrying protein	T	CELLULAR PROCESSES AND SIGNALING	Signal transduction mechanisms
VC_A0231	662.054	0.338932	0.121386	2.79218	0.00523547	0.00996947	VC_A0231	-	putative Transcriptional regulator, AraC family	K	INFORMATION STORAGE AND PROCESSING	Transcription
VC_0593	843.031	0.338176	0.106436	3.17727	0.00148671	0.00307552	VC_0593	folK	2-amino-4-hydroxy-6-hydroxymethyldihydropteridine pyrophosphokinase	H	METABOLISM	Coenzyme transport and metabolism
VC_0942	19420.3	0.338106	0.0845782	3.99756	6.39996e-05	0.000162285	VC_0942	-	-	-	-	-
VC_1878	2350.05	0.336469	0.0936035	3.59462	0.000324863	0.0007449	VC_1878	msbA	Lipid A export ATP-binding/permease protein msbA	V	CELLULAR PROCESSES AND SIGNALING	Defense mechanisms
VC_0462	4196.73	0.336215	0.100925	3.33133	0.000864327	0.00186264	VC_0462	pilT	Twitching mobility protein	N, U	CELLULAR PROCESSES AND SIGNALING, CELLULAR PROCESSES AND SIGNALING	Cell motility, Intracellular trafficking, secretion, and vesicular transport
VC_1661	3432.29	0.332697	0.0853674	3.89724	9.72958e-05	0.000240577	VC_1661	-	-	-	-	-
VC_0518	1426.8	0.331628	0.101833	3.25659	0.00112759	0.00238093	VC_0518	dnaG	DNA primase	L	INFORMATION STORAGE AND PROCESSING	Replication, recombination and repair
VC_A0040	1160.44	0.331582	0.102064	3.24875	0.00115914	0.00244236	VC_A0040	-	conserved hypothetical protein	S	POORLY CHARACTERIZED	Function unknown
VC_2213	1764.1	0.331375	0.101662	3.25957	0.00111582	0.00235983	VC_2213	ompA	Outer membrane protein OmpA	M	CELLULAR PROCESSES AND SIGNALING	Cell wall/membrane/envelope biogenesis
VC_2032	15830.2	0.330726	0.0795897	4.15539	3.2473e-05	8.47753e-05	VC_2032	-	putative Permease of the drug/metabolite transporter (DMT) superfamily	E, G, R	METABOLISM, METABOLISM, POORLY CHARACTERIZED	Amino acid transport and metabolism, Carbohydrate transport and metabolism, General function prediction only
VC_2201	748.079	0.330199	0.117018	2.82179	0.00477572	0.00914655	VC_2201	cheR	Chemotaxis protein methyltransferase	N, T	CELLULAR PROCESSES AND SIGNALING, CELLULAR PROCESSES AND SIGNALING	Cell motility, Signal transduction mechanisms
VC_0721	2589.07	0.328703	0.0948849	3.46423	0.000531745	0.00118643	VC_0721	pstS	Phosphate ABC transporter, periplasmic phosphate-binding protein, PstS	P	METABOLISM	Inorganic ion transport and metabolism
VC_1445	676.538	0.327842	0.112522	2.91359	0.003573	0.00700504	VC_1445	-	putative Signal transduction histidine kinase	T	CELLULAR PROCESSES AND SIGNALING	Signal transduction mechanisms
VC_0315	3143.43	0.326552	0.0855422	3.81744	0.000134842	0.00032651	VC_0315	pssA	phosphatidylserine synthase	I	METABOLISM	Lipid transport and metabolism
VC_2640	5785.49	0.323359	0.0867555	3.72725	0.000193581	0.000456782	VC_2640	-	-	-	-	-
VC_0956	1157.13	0.32329	0.0943721	3.4257	0.000613219	0.00135378	VC_0956	leuS	Leucyl-tRNA synthetase	J	INFORMATION STORAGE AND PROCESSING	Translation, ribosomal structure and biogenesis
VC_1482	6725.86	0.322086	0.0938776	3.43092	0.000601536	0.00133075	VC_1482	-	putative ATP DEPENDENT LON PROTEASE	O	CELLULAR PROCESSES AND SIGNALING	Posttranslational modification, protein turnover, chaperones
VC_1547	1253.12	0.32089	0.104433	3.07268	0.00212143	0.00428815	VC_1547	tolR	Stability protein, TolR	D, N, T, U	CELLULAR PROCESSES AND SIGNALING, CELLULAR PROCESSES AND SIGNALING, CELLULAR PROCESSES AND SIGNALING, CELLULAR PROCESSES AND SIGNALING	Cell cycle control, cell division, chromosome partitioning, Cell motility, Signal transduction mechanisms, Intracellular trafficking, secretion, and vesicular transport
VC_0681	619.016	0.320353	0.112363	2.85105	0.00435757	0.00840238	VC_0681	ribF	Riboflavin biosynthesis protein ribF [Includes: Riboflavin kinase ; FMN adenylyltransferase]	H	METABOLISM	Coenzyme transport and metabolism
VC_0994	11971.6	0.319136	0.100984	3.16026	0.0015763	0.00324565	VC_0994	nagA	N-acetylglucosamine-6-phosphate deacetylase	G	METABOLISM	Carbohydrate transport and metabolism
VC_0365	1565.61	0.319022	0.103986	3.06792	0.00215552	0.00434602	VC_0365	bfr	Bacterioferritin	P	METABOLISM	Inorganic ion transport and metabolism
VC_A0323	2080.85	0.318719	0.0966387	3.29805	0.000973582	0.00208228	VC_A0323	-	Plasmid stabilization system protein RelE (Toxin of TA system RelB-RelE)	S	POORLY CHARACTERIZED	Function unknown
VC_1548	1023.88	0.31732	0.107297	2.95739	0.00310255	0.00613413	VC_1548	-	putative ATPase	D	CELLULAR PROCESSES AND SIGNALING	Cell cycle control, cell division, chromosome partitioning
VC_2493	1098.8	0.315492	0.105521	2.98985	0.00279116	0.0055367	VC_2493	leuD	3-isopropylmalate dehydratase small subunit	E	METABOLISM	Amino acid transport and metabolism
VC_0433	961.785	0.314221	0.105737	2.97173	0.00296124	0.00585766	VC_0433	arcD	Arginine/ornithine antiporter	E	METABOLISM	Amino acid transport and metabolism
VC_t015	3701.92	0.311788	0.0831447	3.74994	0.000176877	0.000418857	VC_t015	-	-	-	-	-
VC_A1090	691.592	0.306375	0.10859	2.82139	0.00478167	0.00915355	VC_A1090	-	putative chemoreceptor glutamine deamidase CheD	N, T	CELLULAR PROCESSES AND SIGNALING, CELLULAR PROCESSES AND SIGNALING	Cell motility, Signal transduction mechanisms
VC_A0884	1397.54	0.304377	0.094505	3.22075	0.00127854	0.00267693	VC_A0884	-	conserved hypothetical protein	M, N, T	CELLULAR PROCESSES AND SIGNALING, CELLULAR PROCESSES AND SIGNALING, CELLULAR PROCESSES AND SIGNALING	Cell wall/membrane/envelope biogenesis, Cell motility, Signal transduction mechanisms
VC_1904	1048.95	0.303007	0.0988031	3.06678	0.00216382	0.00436053	VC_1904	lrp	Leucine-responsive regulatory protein	K	INFORMATION STORAGE AND PROCESSING	Transcription
VC_A0237	2750.22	0.302281	0.0975154	3.09983	0.00193631	0.00393396	VC_A0237	-	putative phosphoribosyl-AMP cyclohydrolase	S	POORLY CHARACTERIZED	Function unknown
VC_2437	4158.04	0.300641	0.0829798	3.62306	0.000291134	0.000672994	VC_2437	hldE	fragment of Bifunctional protein hldE [Includes: D-beta-D-heptose 7-phosphate kinase ; D-beta-D-heptose 1-phosphate adenosyltransferase] (part 2)	M	CELLULAR PROCESSES AND SIGNALING	Cell wall/membrane/envelope biogenesis
VC_0098	1672.39	0.300619	0.106383	2.82583	0.00471581	0.00904489	VC_0098	-	putative Chemotaxis methyl-accepting protein/Histidine kinase protein	N, T	CELLULAR PROCESSES AND SIGNALING, CELLULAR PROCESSES AND SIGNALING	Cell motility, Signal transduction mechanisms
VC_1730	1414.77	0.294608	0.100879	2.92039	0.00349591	0.00687765	VC_1730	topA	DNA topoisomerase 1	L	INFORMATION STORAGE AND PROCESSING	Replication, recombination and repair
VC_1641	6149.28	0.291545	0.086479	3.37128	0.000748203	0.00162383	VC_1641	-	putative EAL domain protein	T	CELLULAR PROCESSES AND SIGNALING	Signal transduction mechanisms
VC_A0002	1179.25	0.288658	0.0994701	2.90196	0.00370835	0.0072454	VC_A0002	-	-	-	-	-
VC_2142	837.339	0.287721	0.101113	2.84555	0.00443348	0.00854047	VC_2142	flaD	Polar flagellin B/D	N	CELLULAR PROCESSES AND SIGNALING	Cell motility
VC_1563	10794	0.285022	0.0933856	3.0521	0.00227247	0.0045633	VC_1563	-	putative Secretion protein HlyD	M	CELLULAR PROCESSES AND SIGNALING	Cell wall/membrane/envelope biogenesis
VC_A0651	1458.95	0.282317	0.0967273	2.91869	0.00351505	0.0069119	VC_A0651	-	conserved hypothetical protein	S	POORLY CHARACTERIZED	Function unknown
VC_1844	8042.57	0.275473	0.0862336	3.1945	0.00140073	0.00291434	VC_1844	cydA	Cytochrome d ubiquinol oxidase subunit 1	C	METABOLISM	Energy production and conversion
VC_2742	2991.84	0.274107	0.0880891	3.1117	0.00186015	0.0037928	VC_2742	-	putative Ribonuclease BN	S	POORLY CHARACTERIZED	Function unknown
VC_2431	3165.68	0.271092	0.0822473	3.29605	0.000980529	0.00209601	VC_2431	parE	DNA topoisomerase IV, subunit B	L	INFORMATION STORAGE AND PROCESSING	Replication, recombination and repair
VC_A0324	1133.35	0.261436	0.0936098	2.79282	0.00522502	0.00995433	VC_A0324	-	Plasmid stabilization system protein RelB (Anti Toxin of TA system RelB-RelE)	L	INFORMATION STORAGE AND PROCESSING	Replication, recombination and repair
VC_0984	5801.6	0.259462	0.0856805	3.02826	0.0024597	0.00491445	VC_0984	toxR	Cholera toxin transcriptional activator	K	INFORMATION STORAGE AND PROCESSING	Transcription
VC_1662	2001.66	0.25425	0.0910948	2.79105	0.00525376	0.00999949	VC_1662	-	putative Fe-S protein	R	POORLY CHARACTERIZED	General function prediction only
VC_A0780	3370.09	-0.256336	0.0831574	-3.08254	0.00205242	0.00416136	VC_A0780	udg	UDP-glucose 6-dehydrogenase	M	CELLULAR PROCESSES AND SIGNALING	Cell wall/membrane/envelope biogenesis
VC_0501	1812.58	-0.27724	0.0927299	-2.98975	0.00279202	0.0055367	VC_0501	-	-	-	-	-
VC_A0765	15173.9	-0.280109	0.0781391	-3.58474	0.000337408	0.000772329	VC_A0765	ltaE	Low specificity L-threonine aldolase	E	METABOLISM	Amino acid transport and metabolism
VC_1968	2702.6	-0.281028	0.0972478	-2.88981	0.00385476	0.00749829	VC_1968	-	putative Transcriptional regulator	K	INFORMATION STORAGE AND PROCESSING	Transcription
VC_A0963	1201.61	-0.286966	0.101783	-2.81939	0.00481146	0.00920615	VC_A0963	-	putative Permease of the drug/metabolite transporter (DMT) superfamily	E, G, R	METABOLISM, METABOLISM, POORLY CHARACTERIZED	Amino acid transport and metabolism, Carbohydrate transport and metabolism, General function prediction only
VC_2429	1382.33	-0.290146	0.0962206	-3.01542	0.0025662	0.00511696	VC_2429	-	conserved hypothetical protein	S	POORLY CHARACTERIZED	Function unknown
VC_0637	1795.55	-0.290235	0.099993	-2.90255	0.00370135	0.00723529	VC_0637	hflB	Cell division protease ftsH	O	CELLULAR PROCESSES AND SIGNALING	Posttranslational modification, protein turnover, chaperones
VC_2491	2301.16	-0.290433	0.0899281	-3.22961	0.0012396	0.00259949	VC_2491	leuB	3-isopropylmalate dehydrogenase	C, E	METABOLISM, METABOLISM	Energy production and conversion, Amino acid transport and metabolism
VC_1886	3543.52	-0.292525	0.0844136	-3.46537	0.000529495	0.00118207	VC_1886	mfd	transcription-repair coupling factor	K, L	INFORMATION STORAGE AND PROCESSING, INFORMATION STORAGE AND PROCESSING	Transcription, Replication, recombination and repair
VC_A1055	5771.23	-0.299665	0.0923464	-3.24501	0.00117445	0.0024733	VC_A1055	-	Putative Transcriptional regulator, LysR family	K	INFORMATION STORAGE AND PROCESSING	Transcription
VC_0285	894.419	-0.305502	0.10472	-2.91731	0.00353064	0.00693568	VC_0285	eda	KHG/KDPG aldolase [Includes: 4-hydroxy-2-oxoglutarate aldolase ; 2-dehydro-3-deoxy-phosphogluconate aldolase]	G	METABOLISM	Carbohydrate transport and metabolism
VC_1444	1404.93	-0.308353	0.101876	-3.02673	0.00247212	0.00493679	VC_1444	-	conserved hypothetical protein	S	POORLY CHARACTERIZED	Function unknown
VC_1372	959.428	-0.308659	0.109297	-2.82403	0.00474242	0.00908716	VC_1372	-	putative GGDEF family protein	T	CELLULAR PROCESSES AND SIGNALING	Signal transduction mechanisms
VC_2732	1013.18	-0.312239	0.097104	-3.21551	0.00130213	0.00272059	VC_2732	epsE	General secretion pathway protein E	N, U	CELLULAR PROCESSES AND SIGNALING, CELLULAR PROCESSES AND SIGNALING	Cell motility, Intracellular trafficking, secretion, and vesicular transport
VC_2457	2089.67	-0.312656	0.1101	-2.83974	0.00451502	0.00868491	VC_2457	acpS	holo-[acyl-carrier-protein] synthase	I	METABOLISM	Lipid transport and metabolism
VC_A0481	1447.3	-0.314618	0.0961103	-3.27351	0.00106222	0.00225368	VC_A0481	-	Plasmid stabilization system 481 protein (Toxin protein of TA system 481-482)	K, R	INFORMATION STORAGE AND PROCESSING, POORLY CHARACTERIZED	Transcription, General function prediction only
VC_2346	1512.09	-0.315348	0.0940532	-3.35287	0.000799774	0.00172915	VC_2346	-	putative membrane protein affecting hemolysin expression	R	POORLY CHARACTERIZED	General function prediction only
VC_0421	1673.4	-0.316534	0.0972285	-3.25557	0.00113167	0.00238827	VC_0421	-	putative Nitrilase/cyanide hydratase and apolipoprotein N-acyltransferase	R	POORLY CHARACTERIZED	General function prediction only
VC_2688	899.524	-0.320534	0.112054	-2.86055	0.00422911	0.0081745	VC_2688	glpX	Fructose-1,6-bisphosphatase class 2	G	METABOLISM	Carbohydrate transport and metabolism
VC_1046	6667.48	-0.323241	0.108027	-2.99223	0.00276945	0.00549742	VC_1046	fadI	3-ketoacyl-CoA thiolase	I	METABOLISM	Lipid transport and metabolism
VC_A0017	677.793	-0.324752	0.108276	-2.99929	0.00270611	0.00538513	VC_A0017	hcp	Haemolysin co-regulated protein (putative Type VI secretion system effector, Hcp1)	S	POORLY CHARACTERIZED	Function unknown
VC_1190	1110.52	-0.325075	0.113998	-2.85159	0.00435007	0.00839198	VC_1190	-	putative phosphoribosylaminoimidazole-succinocarboxamide synthase	F	METABOLISM	Nucleotide transport and metabolism
VC_A0147	2149.84	-0.326046	0.0959091	-3.39953	0.000675023	0.0014771	VC_A0147	lhgO	L-2-hydroxyglutarate oxidase LhgO	R	POORLY CHARACTERIZED	General function prediction only
VC_1405	1007.35	-0.328191	0.114446	-2.86765	0.00413532	0.00800879	VC_1405	-	putative Methyl-accepting chemotaxis protein	N, T	CELLULAR PROCESSES AND SIGNALING, CELLULAR PROCESSES AND SIGNALING	Cell motility, Signal transduction mechanisms
VC_0839	6758.11	-0.329625	0.0927759	-3.55291	0.000380992	0.000866108	VC_0839	tcpJ	Type 4 prepilin-like proteins leader peptide-processing enzyme [Includes: Leader peptidase ; N-methyltransferase]	N, O, U	CELLULAR PROCESSES AND SIGNALING, CELLULAR PROCESSES AND SIGNALING, CELLULAR PROCESSES AND SIGNALING	Cell motility, Posttranslational modification, protein turnover, chaperones, Intracellular trafficking, secretion, and vesicular transport
VC_1860	8235.85	-0.331377	0.081101	-4.08598	4.38915e-05	0.000112807	VC_1860	xthA	Exodeoxyribonuclease III	L	INFORMATION STORAGE AND PROCESSING	Replication, recombination and repair
VC_A0788	533.075	-0.33185	0.117746	-2.81836	0.00482692	0.00923127	VC_A0788	-	putative DnaJ-class molecular chaperone	O	CELLULAR PROCESSES AND SIGNALING	Posttranslational modification, protein turnover, chaperones
VC_t068	7097.56	-0.333153	0.0846901	-3.93379	8.36157e-05	0.000209092	VC_t068	-	-	-	-	-
VC_0565	993.311	-0.335025	0.116416	-2.87782	0.00400428	0.00777773	VC_0565	degS	Protease degS	O	CELLULAR PROCESSES AND SIGNALING	Posttranslational modification, protein turnover, chaperones
VC_0929	847.453	-0.339423	0.110573	-3.06966	0.00214303	0.00432522	VC_0929	-	-	-	-	-
VC_A0219	550.52	-0.340178	0.121289	-2.80469	0.00503645	0.00960428	VC_A0219	-	-	-	-	-
VC_0902	597.406	-0.341765	0.117188	-2.91638	0.00354117	0.00695294	VC_0902	queF	NADPH-dependent 7-cyano-7-deazaguanine reductase	R, S	POORLY CHARACTERIZED, POORLY CHARACTERIZED	General function prediction only, Function unknown
VC_0756	493.557	-0.342218	0.119269	-2.8693	0.00411385	0.00797374	VC_0756	ndk	Nucleoside diphosphate kinase	F	METABOLISM	Nucleotide transport and metabolism
VC_1815	940.425	-0.343887	0.0998129	-3.44531	0.000570396	0.00126698	VC_1815	-	putative C-factor	I, Q, R	METABOLISM, METABOLISM, POORLY CHARACTERIZED	Lipid transport and metabolism, Secondary metabolites biosynthesis, transport and catabolism, General function prediction only
VC_0048	478.204	-0.343892	0.121734	-2.82494	0.00472902	0.00906585	VC_0048	smf	smf protein	L, U	INFORMATION STORAGE AND PROCESSING, CELLULAR PROCESSES AND SIGNALING	Replication, recombination and repair, Intracellular trafficking, secretion, and vesicular transport
VC_A0368	616.569	-0.344312	0.120116	-2.86649	0.00415046	0.00803105	VC_A0368	-	-	-	-	-
VC_A1045	2732.09	-0.344505	0.0879611	-3.91656	8.98233e-05	0.000223413	VC_A1045	mtlA	PTS system mannitol-specific EIICBA component [Includes: Mannitol permease IIC component ; Mannitol-specific phosphotransferase enzyme IIB component ; Mannitol-specific phosphotransferase enzyme IIA component]	G	METABOLISM	Carbohydrate transport and metabolism
VC_2134	708.027	-0.346176	0.122048	-2.83639	0.00456262	0.00876799	VC_2134	fliE	Flagellar hook-basal body complex protein fliE	N, U	CELLULAR PROCESSES AND SIGNALING, CELLULAR PROCESSES AND SIGNALING	Cell motility, Intracellular trafficking, secretion, and vesicular transport
VC_1568	681.805	-0.347477	0.105321	-3.29921	0.000969559	0.00207479	VC_1568	-	Putative ABC-type antimicrobial peptide transport system, ATPase component	V	CELLULAR PROCESSES AND SIGNALING	Defense mechanisms
VC_0491	1346.57	-0.3477	0.113319	-3.06833	0.00215255	0.00434224	VC_0491	-	-	-	-	-
VC_1207	606.097	-0.349522	0.116133	-3.00967	0.00261533	0.00521231	VC_1207	-	-	-	-	-
VC_0705	1089.55	-0.35287	0.11568	-3.0504	0.00228539	0.00458693	VC_0705	pheA	P-protein [Includes: Chorismate mutase ; Prephenate dehydratase]	E	METABOLISM	Amino acid transport and metabolism
VC_A0537	1094.96	-0.354896	0.100272	-3.53932	0.000401163	0.000910212	VC_A0537	-	-	-	-	-
VC_0429	2656.94	-0.35496	0.0968593	-3.6647	0.000247628	0.000577459	VC_0429	-	putative TRAP-type uncharacterized transport system, fused permease components	R	POORLY CHARACTERIZED	General function prediction only
VC_A0690	2006.14	-0.356879	0.0940278	-3.79546	0.00014737	0.000354687	VC_A0690	phbA	acetyl-CoA acetyltransferase	I	METABOLISM	Lipid transport and metabolism
VC_2033	1130.75	-0.356901	0.111096	-3.21255	0.00131564	0.00274737	VC_2033	adhE	Aldehyde-alcohol dehydrogenase [Includes: Alcohol dehydrogenase ; Acetaldehyde dehydrogenase [acetylating] ; Pyruvate-formate-lyase deactivase]	C	METABOLISM	Energy production and conversion
VC_0151	1769.91	-0.357156	0.126971	-2.8129	0.00490971	0.0093806	VC_0151	sthA	Soluble pyridine nucleotide transhydrogenase	C	METABOLISM	Energy production and conversion
VC_1470	1030.5	-0.357753	0.105533	-3.38996	0.00069904	0.00152462	VC_1470	tlcR	TlcR protein	K	INFORMATION STORAGE AND PROCESSING	Transcription
VC_A0026	3722.61	-0.359813	0.117478	-3.0628	0.00219274	0.00441658	VC_A0026	-	conserved hypothetical protein	S	POORLY CHARACTERIZED	Function unknown
VC_2747	739.828	-0.360481	0.1092	-3.30112	0.000962989	0.00206184	VC_2747	-	-	-	-	-
VC_1738	881.821	-0.361319	0.0999025	-3.61671	0.00029837	0.000687322	VC_1738	-	fragment of putative Trans-2-enoyl-CoA reductase (NAD(+)) (part 2)	S	POORLY CHARACTERIZED	Function unknown
VC_A0542	997.295	-0.361779	0.108687	-3.32864	0.000872702	0.00187763	VC_A0542	-	putative Bacterial regulatory protein, LysR	K	INFORMATION STORAGE AND PROCESSING	Transcription
VC_A0095	1468.57	-0.362349	0.0962715	-3.76382	0.000167335	0.000398875	VC_A0095	-	conserved hypothetical protein	C	METABOLISM	Energy production and conversion
VC_2478	13622.9	-0.363034	0.0890881	-4.075	4.60152e-05	0.000118189	VC_2478	zapA	Cell division protein	S	POORLY CHARACTERIZED	Function unknown
VC_A0446	2444.28	-0.364843	0.096103	-3.79637	0.00014683	0.000353601	VC_A0446	-	-	-	-	-
VC_1298	1846.26	-0.36569	0.0888691	-4.11493	3.87294e-05	0.000100122	VC_1298	-	putative Methyl-accepting chemotaxis protein	N, T	CELLULAR PROCESSES AND SIGNALING, CELLULAR PROCESSES AND SIGNALING	Cell motility, Signal transduction mechanisms
VC_2702	1591.08	-0.368123	0.102443	-3.59343	0.000326356	0.000747891	VC_2702	-	putative Signal transduction response regulator fused with Transcriptional regulator, LuxR family	K, T	INFORMATION STORAGE AND PROCESSING, CELLULAR PROCESSES AND SIGNALING	Transcription, Signal transduction mechanisms
VC_0774	867.167	-0.368307	0.108865	-3.38315	0.000716602	0.00156035	VC_0774	vibA	Vibriobactin-specific 2,3-dihydro-2,3-dihydroxybenzoate dehydrogenase	I, Q, R	METABOLISM, METABOLISM, POORLY CHARACTERIZED	Lipid transport and metabolism, Secondary metabolites biosynthesis, transport and catabolism, General function prediction only
VC_1717	1014.96	-0.369457	0.100247	-3.68548	0.00022827	0.000535143	VC_1717	smtA	SAM-dependent methyltransferase smtA	Q, R	METABOLISM, POORLY CHARACTERIZED	Secondary metabolites biosynthesis, transport and catabolism, General function prediction only
VC_2232	793.853	-0.372737	0.113525	-3.2833	0.001026	0.00218265	VC_2232	-	-	-	-	-
VC_A0921	2157.93	-0.372856	0.0992574	-3.75646	0.000172337	0.000409816	VC_A0921	-	-	-	-	-
VC_A0574	1859.5	-0.373223	0.0890066	-4.19321	2.75036e-05	7.26607e-05	VC_A0574	-	putative fused acyl-CoA synthetase and Acetyltransferase	C, K, R	METABOLISM, INFORMATION STORAGE AND PROCESSING, POORLY CHARACTERIZED	Energy production and conversion, Transcription, General function prediction only
VC_1867	11695.2	-0.373476	0.0994897	-3.75391	0.000174094	0.000412514	VC_1867	-	conserved hypothetical protein	S	POORLY CHARACTERIZED	Function unknown
VC_A0972	834.517	-0.373531	0.113385	-3.29435	0.000986495	0.00210763	VC_A0972	-	putative Permease of the major facilitator superfamily	E, G, P, R	METABOLISM, METABOLISM, METABOLISM, POORLY CHARACTERIZED	Amino acid transport and metabolism, Carbohydrate transport and metabolism, Inorganic ion transport and metabolism, General function prediction only
VC_0767	415.914	-0.375343	0.123237	-3.0457	0.00232137	0.0046521	VC_0767	guaB	inositol-5-monophosphate dehydrogenase	F, R	METABOLISM, POORLY CHARACTERIZED	Nucleotide transport and metabolism, General function prediction only
VC_1704	1101.65	-0.376282	0.0982065	-3.83154	0.000127345	0.000309678	VC_1704	metE	5-methyltetrahydropteroyltriglutamate--homocysteine methyltransferase	E	METABOLISM	Amino acid transport and metabolism
VC_1498	1255.56	-0.377463	0.123422	-3.05831	0.00222593	0.00447889	VC_1498	-	putative GAF DOMAIN-CONTAINING PROTEIN, INVOLVED IN SIGNAL TRANSDUCTION	T	CELLULAR PROCESSES AND SIGNALING	Signal transduction mechanisms
VC_0353	885.699	-0.377849	0.10827	-3.48988	0.000483243	0.00108552	VC_0353	-	conserved hypothetical protein with WD40 domain	R	POORLY CHARACTERIZED	General function prediction only
VC_1286	2154.19	-0.378225	0.0880875	-4.29374	1.75691e-05	4.73913e-05	VC_1286	-	putative Transcriptional regulator, LacI family	K	INFORMATION STORAGE AND PROCESSING	Transcription
VC_0711	551.613	-0.379479	0.131333	-2.88944	0.00385925	0.00750337	VC_0711	clpB	Chaperone protein clpB	O	CELLULAR PROCESSES AND SIGNALING	Posttranslational modification, protein turnover, chaperones
VC_A0241	1957.72	-0.379917	0.110737	-3.43081	0.000601781	0.00133075	VC_A0241	-	Putative L-ribulose-5-phosphate 3-epimerase sgbU	G	METABOLISM	Carbohydrate transport and metabolism
VC_0187	1111.93	-0.380917	0.115868	-3.28752	0.00101073	0.00215478	VC_0187	-	putative Protein involved in catabolism of external DNA	R	POORLY CHARACTERIZED	General function prediction only
VC_2305	571.801	-0.381535	0.129917	-2.93676	0.00331663	0.00654438	VC_2305	ompK	outer membrane protein OmpK	M	CELLULAR PROCESSES AND SIGNALING	Cell wall/membrane/envelope biogenesis
VC_2233	847.623	-0.385519	0.10715	-3.59794	0.000320751	0.000735894	VC_2233	dnaQ	DNA polymerase III epsilon subunit	L	INFORMATION STORAGE AND PROCESSING	Replication, recombination and repair
VC_1526	1372.97	-0.385625	0.101357	-3.80461	0.000142026	0.000342448	VC_1526	mobA	Molybdopterin-guanine dinucleotide biosynthesis protein A	H	METABOLISM	Coenzyme transport and metabolism
VC_2664	369.794	-0.385825	0.1346	-2.86646	0.00415086	0.00803105	VC_2664	groL	60 kDa chaperonin	O	CELLULAR PROCESSES AND SIGNALING	Posttranslational modification, protein turnover, chaperones
VC_A0455	6497.96	-0.386097	0.100716	-3.83352	0.000126322	0.000307567	VC_A0455	-	putative Type 1 glutamine amidotransferase (GATase1)-like	R	POORLY CHARACTERIZED	General function prediction only
VC_0811	380.13	-0.387669	0.13777	-2.8139	0.00489452	0.00935606	VC_0811	-	-	-	-	-
VC_A0998	977.15	-0.389963	0.0988881	-3.94348	8.0309e-05	0.000201203	VC_A0998	xenB	Xenobiotic reductase B	C	METABOLISM	Energy production and conversion
VC_2484	942.888	-0.391322	0.100843	-3.88049	0.000104245	0.000256483	VC_2484	-	putative Long-chain-fatty-acid--CoA ligase	I	METABOLISM	Lipid transport and metabolism
VC_0730	330.529	-0.391579	0.129431	-3.02538	0.00248318	0.00495638	VC_0730	-	putative Copper homeostasis protein CutC	P	METABOLISM	Inorganic ion transport and metabolism
VC_2704	812.499	-0.391641	0.106811	-3.66665	0.000245745	0.000573742	VC_2704	-	conserved hypothetical protein	S	POORLY CHARACTERIZED	Function unknown
VC_0074	692.946	-0.391999	0.126808	-3.09128	0.00199295	0.0040449	VC_0074	-	-	-	-	-
VC_A0087	1797.73	-0.395058	0.107683	-3.66873	0.000243758	0.000570107	VC_A0087	-	-	-	-	-
VC_0836	429.98	-0.395141	0.125534	-3.14767	0.00164576	0.00337992	VC_0836	tcpE	Toxin coregulated pilus biosynthesis protein E	N, U	CELLULAR PROCESSES AND SIGNALING, CELLULAR PROCESSES AND SIGNALING	Cell motility, Intracellular trafficking, secretion, and vesicular transport
VC_0260	492.73	-0.396511	0.115868	-3.42208	0.000621435	0.00136736	VC_0260	rfbU	mannosyl-transferase	G, M	METABOLISM, CELLULAR PROCESSES AND SIGNALING	Carbohydrate transport and metabolism, Cell wall/membrane/envelope biogenesis
VC_2175	2130.81	-0.396889	0.100754	-3.9392	8.17548e-05	0.000204696	VC_2175	kdsA	2-dehydro-3-deoxyphosphooctonate aldolase	M	CELLULAR PROCESSES AND SIGNALING	Cell wall/membrane/envelope biogenesis
VC_A0557	2646.07	-0.397949	0.0880037	-4.52196	6.12686e-06	1.74877e-05	VC_A0557	-	putative c-di-GMP synthetase fused with Bacterial extracellular solute-binding protein, family 3	E, T	METABOLISM, CELLULAR PROCESSES AND SIGNALING	Amino acid transport and metabolism, Signal transduction mechanisms
VC_A0103	1409.42	-0.400159	0.109183	-3.66504	0.000247296	0.000577025	VC_A0103	-	putative Sulfate permease	P	METABOLISM	Inorganic ion transport and metabolism
VC_0152	710.716	-0.400626	0.120879	-3.31427	0.000918825	0.00196941	VC_0152	fabR	HTH-type transcriptional repressor fabR	K	INFORMATION STORAGE AND PROCESSING	Transcription
VC_1392	9604.7	-0.400845	0.088337	-4.53768	5.68768e-06	1.62809e-05	VC_1392	cry	Cryptochrome-like protein cry2	L	INFORMATION STORAGE AND PROCESSING	Replication, recombination and repair
VC_0806	1865.25	-0.403238	0.0922985	-4.36885	1.24903e-05	3.44154e-05	VC_0806	-	putative NAD(FAD)-utilizing dehydrogenase, sll0175 homolog	R	POORLY CHARACTERIZED	General function prediction only
VC_2257	1054.8	-0.403353	0.0960383	-4.19991	2.67018e-05	7.07304e-05	VC_2257	frr	ribosome recycling factor	J	INFORMATION STORAGE AND PROCESSING	Translation, ribosomal structure and biogenesis
VC_1613	1373.05	-0.403826	0.129475	-3.11896	0.00181493	0.00370439	VC_1613	-	-	-	-	-
VC_A0482	822.278	-0.404745	0.10626	-3.80901	0.000139523	0.00033733	VC_A0482	-	Plasmid stabilization 482 protein (anti-toxin protein of TA system 481-482)	S	POORLY CHARACTERIZED	Function unknown
VC_A0090	602.407	-0.404847	0.109495	-3.6974	0.000217823	0.000512161	VC_A0090	-	putative Permease of the drug/metabolite transporter (DMT) superfamily	E, G, R	METABOLISM, METABOLISM, POORLY CHARACTERIZED	Amino acid transport and metabolism, Carbohydrate transport and metabolism, General function prediction only
VC_1866	504.311	-0.405045	0.13294	-3.04682	0.00231274	0.00463715	VC_1866	pflB	Formate acetyltransferase 1	C	METABOLISM	Energy production and conversion
VC_0335	345.415	-0.407955	0.133614	-3.05323	0.0022639	0.00455069	VC_0335	-	putative Membrane-bound metallopeptidase	D	CELLULAR PROCESSES AND SIGNALING	Cell cycle control, cell division, chromosome partitioning
VC_1926	1483.62	-0.408405	0.0983655	-4.15191	3.29709e-05	8.59621e-05	VC_1926	dctD	C4-dicarboxylate transport transcriptional regulatory protein dctD	T	CELLULAR PROCESSES AND SIGNALING	Signal transduction mechanisms
VC_0734	1872.77	-0.410162	0.092728	-4.42329	9.72099e-06	2.70853e-05	VC_0734	aceB	Malate synthase A	C	METABOLISM	Energy production and conversion
VC_A0008	10818	-0.410517	0.0877276	-4.67945	2.87648e-06	8.54775e-06	VC_A0008	-	putative Methyl-accepting chemotaxis protein	N, T	CELLULAR PROCESSES AND SIGNALING, CELLULAR PROCESSES AND SIGNALING	Cell motility, Signal transduction mechanisms
VC_2605	410.519	-0.415119	0.127265	-3.26184	0.00110691	0.00234349	VC_2605	-	conserved hypothetical protein	R	POORLY CHARACTERIZED	General function prediction only
VC_0951	391.485	-0.417174	0.13709	-3.04307	0.00234176	0.00469059	VC_0951	rlmH	Ribosomal RNA large subunit methyltransferase H	S	POORLY CHARACTERIZED	Function unknown
VC_1289	1696.22	-0.418377	0.114019	-3.66937	0.000243149	0.000569017	VC_1289	-	putative Methyl-accepting chemotaxis protein	N, T	CELLULAR PROCESSES AND SIGNALING, CELLULAR PROCESSES AND SIGNALING	Cell motility, Signal transduction mechanisms
VC_2602	2597.8	-0.418652	0.110024	-3.8051	0.000141745	0.000342184	VC_2602	purA	adenylosuccinate synthetase	F	METABOLISM	Nucleotide transport and metabolism
VC_0079	2677.73	-0.420939	0.0931995	-4.51654	6.28587e-06	1.79159e-05	VC_0079	-	-	-	-	-
VC_A0063	1645.61	-0.421414	0.0907883	-4.64172	3.45521e-06	1.01762e-05	VC_A0063	-	putative Protease II	E	METABOLISM	Amino acid transport and metabolism
VC_A0720	847.171	-0.42361	0.11164	-3.79443	0.000147981	0.000355941	VC_A0720	-	-	-	-	-
VC_1949	704.095	-0.423977	0.114119	-3.71523	0.000203021	0.000478773	VC_1949	-	putative Pyoverdine biosynthesis protein PvcA	Q	METABOLISM	Secondary metabolites biosynthesis, transport and catabolism
VC_1070	317.858	-0.423986	0.134417	-3.15427	0.00160901	0.00330959	VC_1070	-	putative Protein tyrosine phosphatase	T	CELLULAR PROCESSES AND SIGNALING	Signal transduction mechanisms
VC_0967	692.414	-0.424153	0.124758	-3.39981	0.000674331	0.0014764	VC_0967	-	-	-	-	-
VC_1707	355.818	-0.424573	0.132991	-3.1925	0.00141049	0.00293157	VC_1707	-	-	-	-	-
VC_A0822	483.987	-0.424965	0.127866	-3.32353	0.000888856	0.00191135	VC_A0822	ask	Aspartokinase	E	METABOLISM	Amino acid transport and metabolism
VC_1123	301.421	-0.425776	0.138265	-3.07942	0.00207403	0.00419876	VC_1123	-	-	-	-	-
VC_0227	744.742	-0.427292	0.115587	-3.69671	0.000218409	0.000513235	VC_0227	kdkA	3-deoxy-D-manno-octulosonic acid kinase	K, L, R, T	INFORMATION STORAGE AND PROCESSING, INFORMATION STORAGE AND PROCESSING, POORLY CHARACTERIZED, CELLULAR PROCESSES AND SIGNALING	Transcription, Replication, recombination and repair, General function prediction only, Signal transduction mechanisms
VC_A0105	455.173	-0.427895	0.124713	-3.43104	0.000601272	0.00133075	VC_A0105	-	putative Uropathogenic specific protein	S	POORLY CHARACTERIZED	Function unknown
VC_A0600	1075.14	-0.428429	0.0998755	-4.28963	1.78973e-05	4.82112e-05	VC_A0600	-	putative 2-aminoethylphosphonate uptake and metabolism regulator	K	INFORMATION STORAGE AND PROCESSING	Transcription
VC_A0881	543.997	-0.429565	0.122968	-3.4933	0.000477097	0.00107293	VC_A0881	-	-	-	-	-
VC_2739	335.946	-0.430884	0.133011	-3.23946	0.00119758	0.00251536	VC_2739	-	-	-	-	-
VC_A0475	433.923	-0.433097	0.12837	-3.37381	0.00074136	0.00161074	VC_A0475	doc	Plasmid stabilization system Doc protein(toxin of TA system Phd-Doc)	R	POORLY CHARACTERIZED	General function prediction only
VC_0780	689.293	-0.434094	0.112588	-3.85558	0.000115454	0.000282315	VC_0780	vibD	Vibriobactin synthase component D	Q	METABOLISM	Secondary metabolites biosynthesis, transport and catabolism
VC_A1072	1108.07	-0.435653	0.104776	-4.15797	3.21094e-05	8.39913e-05	VC_A1072	-	Putative Delta 1-pyrroline-5-carboxylate dehydrogenase	C	METABOLISM	Energy production and conversion
VC_1138	331.905	-0.437632	0.133127	-3.28734	0.00101139	0.00215491	VC_1138	hisF	Imidazole glycerol phosphate synthase subunit hisF	E	METABOLISM	Amino acid transport and metabolism
VC_1172	429.244	-0.438889	0.130441	-3.36465	0.000766409	0.00166062	VC_1172	trpD	Anthranilate phosphoribosyltransferase	E	METABOLISM	Amino acid transport and metabolism
VC_2699	1466.61	-0.439027	0.0917881	-4.78305	1.72655e-06	5.25232e-06	VC_2699	dcuA	Anaerobic C4-dicarboxylate transporter dcuA	R	POORLY CHARACTERIZED	General function prediction only
VC_2432	3513.13	-0.440046	0.0851308	-5.16906	2.35269e-07	7.86076e-07	VC_2432	yqiA	Esterase yqiA	R	POORLY CHARACTERIZED	General function prediction only
VC_1890	1253.68	-0.441174	0.0927419	-4.75701	1.96479e-06	5.92267e-06	VC_1890	ndh	NADH dehydrogenase	C	METABOLISM	Energy production and conversion
VC_2046	556.239	-0.44259	0.133284	-3.32065	0.000898078	0.00192998	VC_2046	-	-	-	-	-
VC_2408	1797.55	-0.443538	0.112348	-3.94791	7.88373e-05	0.000197765	VC_2408	ftsL	Cell division protein FtsL	D	CELLULAR PROCESSES AND SIGNALING	Cell cycle control, cell division, chromosome partitioning
VC_A0807	529.914	-0.443608	0.12547	-3.53557	0.000406903	0.00092185	VC_A0807	-	putative ABC-type phosphate transport system, periplasmic component	P	METABOLISM	Inorganic ion transport and metabolism
VC_1508	274.848	-0.443833	0.142047	-3.12455	0.00178077	0.00363841	VC_1508	-	conserved hypothetical protein	S	POORLY CHARACTERIZED	Function unknown
VC_A0530	2027.97	-0.443941	0.0974232	-4.55683	5.1932e-06	1.49624e-05	VC_A0530	-	putative Pyruvate-flavodoxin oxidoreductase	C	METABOLISM	Energy production and conversion
VC_0188	322.362	-0.444953	0.131272	-3.38956	0.000700052	0.00152599	VC_0188	prlC	Oligopeptidase	E	METABOLISM	Amino acid transport and metabolism
VC_2247	2413.45	-0.444955	0.10441	-4.2616	2.02972e-05	5.44545e-05	VC_2247	lpxB	Lipid-A-disaccharide synthase	M	CELLULAR PROCESSES AND SIGNALING	Cell wall/membrane/envelope biogenesis
VC_0171	14080.8	-0.4453	0.112909	-3.94389	8.01688e-05	0.000200978	VC_0171	-	putative ABC-type dipeptide transport system, periplasmic component	E	METABOLISM	Amino acid transport and metabolism
VC_1943	839.213	-0.449391	0.114436	-3.92699	8.60151e-05	0.000214552	VC_1943	-	-	-	-	-
VC_1415	592.62	-0.450695	0.111115	-4.05611	4.98959e-05	0.000127744	VC_1415	hcp	Haemolysin co-regulated protein (putative Type VI secretion system effector, Hcp1)	S	POORLY CHARACTERIZED	Function unknown
VC_1217	331.667	-0.451485	0.130271	-3.46573	0.000528797	0.00118118	VC_1217	-	putative Histone acetyltransferase HPA2	K, R	INFORMATION STORAGE AND PROCESSING, POORLY CHARACTERIZED	Transcription, General function prediction only
VC_A0813	363.329	-0.452417	0.143739	-3.1475	0.00164675	0.00338022	VC_A0813	-	Bacterial leucyl aminopeptidase	R	POORLY CHARACTERIZED	General function prediction only
VC_0129	310.67	-0.458608	0.137616	-3.33251	0.000860663	0.00185575	VC_0129	-	putative HALOACID DEHALOGENASE-LIKE HYDROLASE	R	POORLY CHARACTERIZED	General function prediction only
VC_2089	777.895	-0.459252	0.104575	-4.39161	1.12515e-05	3.11315e-05	VC_2089	sdhA	succinate dehydrogenase, flavoprotein subunit	C	METABOLISM	Energy production and conversion
VC_A0243	279.499	-0.459513	0.160154	-2.86919	0.00411522	0.00797374	VC_A0243	-	putative pyridoxal phosphate (PLP) phosphatase	R	POORLY CHARACTERIZED	General function prediction only
VC_A0148	370.261	-0.460382	0.147179	-3.12804	0.00175977	0.0035992	VC_A0148	-	-	-	-	-
VC_A0222	408.373	-0.462961	0.133913	-3.45718	0.000545852	0.00121518	VC_A0222	-	putative Lipase activator protein, Lipase-specific foldase	O	CELLULAR PROCESSES AND SIGNALING	Posttranslational modification, protein turnover, chaperones
VC_A1098	1047.25	-0.463469	0.104844	-4.42056	9.84476e-06	2.73917e-05	VC_A1098	-	putative ABC-type dipeptide transport system, periplasmic component	E	METABOLISM	Amino acid transport and metabolism
VC_1684	207.204	-0.464045	0.160192	-2.89681	0.00376977	0.00734375	VC_1684	sapF	Peptide transport system ATP-binding protein sapF	V	CELLULAR PROCESSES AND SIGNALING	Defense mechanisms
VC_2087	817.374	-0.464085	0.103912	-4.46612	7.96504e-06	2.24126e-05	VC_2087	sucA	2-oxoglutarate dehydrogenase E1 component	C	METABOLISM	Energy production and conversion
VC_0814	467.119	-0.464195	0.160394	-2.8941	0.0038025	0.00740388	VC_0814	-	putative Transcriptional regulator	K	INFORMATION STORAGE AND PROCESSING	Transcription
VC_A1035	1033.85	-0.465674	0.10741	-4.33549	1.45437e-05	3.98248e-05	VC_A1035	-	-	-	-	-
VC_A0129	621.891	-0.466689	0.116183	-4.01683	5.89861e-05	0.00015005	VC_A0129	rbsC	Ribose transport system permease protein rbsC	G	METABOLISM	Carbohydrate transport and metabolism
VC_2003	759.306	-0.467106	0.107329	-4.3521	1.34838e-05	3.69479e-05	VC_2003	rlmA	Ribosomal RNA large subunit methyltransferase A	Q, R	METABOLISM, POORLY CHARACTERIZED	Secondary metabolites biosynthesis, transport and catabolism, General function prediction only
VC_2733	665.642	-0.468083	0.11103	-4.21582	2.48877e-05	6.61453e-05	VC_2733	epsD	General secretion pathway protein D	N, U	CELLULAR PROCESSES AND SIGNALING, CELLULAR PROCESSES AND SIGNALING	Cell motility, Intracellular trafficking, secretion, and vesicular transport
VC_2091	568.222	-0.469273	0.136345	-3.4418	0.00057786	0.00128213	VC_2091	sdhC	Succinate dehydrogenase cytochrome b556 subunit	C	METABOLISM	Energy production and conversion
VC_A0575	910.845	-0.469344	0.100983	-4.64774	3.35588e-06	9.89835e-06	VC_A0575	hupR	putative LysR family transcriptional regulator	K	INFORMATION STORAGE AND PROCESSING	Transcription
VC_1836	329.87	-0.471834	0.132014	-3.57413	0.0003514	0.000801586	VC_1836	tolB	Protein tolB	U	CELLULAR PROCESSES AND SIGNALING	Intracellular trafficking, secretion, and vesicular transport
VC_2514	294.833	-0.472954	0.141093	-3.35207	0.000802102	0.00173324	VC_2514	murA	UDP-N-acetylglucosamine 1-carboxyvinyltransferase	M	CELLULAR PROCESSES AND SIGNALING	Cell wall/membrane/envelope biogenesis
VC_0409	243.01	-0.473748	0.152344	-3.10971	0.00187268	0.00381444	VC_0409	fimA	18.1 kDa type 4 prepilin, structural subunit of mannose-sens	N, U	CELLULAR PROCESSES AND SIGNALING, CELLULAR PROCESSES AND SIGNALING	Cell motility, Intracellular trafficking, secretion, and vesicular transport
VC_0692	2153.76	-0.47423	0.118389	-4.00569	6.18358e-05	0.000157098	VC_0692	nagZ	Beta-hexosaminidase	G	METABOLISM	Carbohydrate transport and metabolism
VC_2362	1229.4	-0.474547	0.100071	-4.74212	2.11498e-06	6.35133e-06	VC_2362	thrC	threonine synthase	E	METABOLISM	Amino acid transport and metabolism
VC_1313	16251.8	-0.475557	0.110776	-4.29297	1.76298e-05	4.75227e-05	VC_1313	-	putative Methyl-accepting chemotaxis protein	N, T	CELLULAR PROCESSES AND SIGNALING, CELLULAR PROCESSES AND SIGNALING	Cell motility, Signal transduction mechanisms
VC_2729	2686.25	-0.476732	0.0899624	-5.29924	1.16287e-07	4.04158e-07	VC_2729	-	putative General secretion pathway protein H	N, U	CELLULAR PROCESSES AND SIGNALING, CELLULAR PROCESSES AND SIGNALING	Cell motility, Intracellular trafficking, secretion, and vesicular transport
VC_1015	226.045	-0.476919	0.166621	-2.86229	0.00420589	0.00813357	VC_1015	rnfC	Electron transport complex protein rnfC	C	METABOLISM	Energy production and conversion
VC_1410	12771	-0.476973	0.0894138	-5.33445	9.58367e-08	3.36614e-07	VC_1410	vceA	putative Secretion protein HlyD family	V	CELLULAR PROCESSES AND SIGNALING	Defense mechanisms
VC_2430	816.514	-0.4778	0.141376	-3.37964	0.000725819	0.00157956	VC_2430	parC	DNA topoisomerase IV, subunit A	L	INFORMATION STORAGE AND PROCESSING	Replication, recombination and repair
VC_A0997	348.033	-0.4779	0.133947	-3.56783	0.000359943	0.000819665	VC_A0997	-	conserved hypothetical protein	S	POORLY CHARACTERIZED	Function unknown
VC_0697	300.177	-0.482146	0.163138	-2.95545	0.00312218	0.00616987	VC_0697	-	-	-	-	-
VC_1570	414.721	-0.482237	0.145229	-3.32052	0.000898488	0.00192998	VC_1570	-	putative Cytochrome d ubiquinol oxidase subunit II	C	METABOLISM	Energy production and conversion
VC_A0774	2705.75	-0.483425	0.111627	-4.33071	1.4863e-05	4.05875e-05	VC_A0774	galE	UDP-glucose 4-epimerase	M	CELLULAR PROCESSES AND SIGNALING	Cell wall/membrane/envelope biogenesis
VC_A0908	325.908	-0.483737	0.139283	-3.47306	0.000514551	0.00115324	VC_A0908	-	conserved hypothetical protein	P	METABOLISM	Inorganic ion transport and metabolism
VC_A0075	323.443	-0.483961	0.133372	-3.62866	0.000284895	0.000658954	VC_A0075	-	putative molybdopterin binding domain, Sulfite oxidase (SO), family protein	S	POORLY CHARACTERIZED	Function unknown
VC_1094	426.448	-0.486227	0.150341	-3.23417	0.00121998	0.00255971	VC_1094	oppD	Oligopeptide transport ATP-binding protein oppD	E, P	METABOLISM, METABOLISM	Amino acid transport and metabolism, Inorganic ion transport and metabolism
VC_0961	659.532	-0.487073	0.116548	-4.17915	2.92601e-05	7.70451e-05	VC_0961	phoH	Protein phoH (Phosphate starvation-inducible protein psiH)	T	CELLULAR PROCESSES AND SIGNALING	Signal transduction mechanisms
VC_1683	174.795	-0.489054	0.168598	-2.90072	0.00372308	0.00726704	VC_1683	sapD	Peptide transport system ATP-binding protein sapD	V	CELLULAR PROCESSES AND SIGNALING	Defense mechanisms
VC_A0470	1067.44	-0.489942	0.126217	-3.88173	0.000103714	0.000255336	VC_A0470	-	putative Acetyltransferase	R	POORLY CHARACTERIZED	General function prediction only
VC_0145	452.769	-0.49001	0.123559	-3.96581	7.31485e-05	0.000183726	VC_0145	-	conserved hypothetical protein	S	POORLY CHARACTERIZED	Function unknown
VC_A0194	2651.84	-0.490428	0.0861628	-5.69188	1.25651e-08	4.79451e-08	VC_A0194	-	putative Potassium voltage-gated channel subfamily KQT	P	METABOLISM	Inorganic ion transport and metabolism
VC_0158	792.067	-0.491873	0.11285	-4.35864	1.30874e-05	3.59361e-05	VC_0158	murI	Glutamate racemase	M	CELLULAR PROCESSES AND SIGNALING	Cell wall/membrane/envelope biogenesis
VC_A1107	1473.08	-0.493663	0.0968467	-5.09736	3.44424e-07	1.12896e-06	VC_A1107	-	-	-	-	-
VC_1229	1607.66	-0.493683	0.103122	-4.78737	1.68982e-06	5.15239e-06	VC_1229	-	putative Auxin efflux carrier	R	POORLY CHARACTERIZED	General function prediction only
VC_2360	331.206	-0.493702	0.133558	-3.69653	0.000218564	0.000513297	VC_2360	nfo	Endonuclease 4	L	INFORMATION STORAGE AND PROCESSING	Replication, recombination and repair
VC_0737	3865.43	-0.493891	0.0859977	-5.74308	9.29698e-09	3.56116e-08	VC_0737	-	putative CBS domain protein	R	POORLY CHARACTERIZED	General function prediction only
VC_0779	191.461	-0.494828	0.166214	-2.97706	0.00291028	0.00575972	VC_0779	fepC	Ferric enterobactin transport ATP-binding protein FepC	H, P	METABOLISM, METABOLISM	Coenzyme transport and metabolism, Inorganic ion transport and metabolism
VC_0212	480.544	-0.496086	0.12482	-3.97442	7.0552e-05	0.000177541	VC_0212	-	putative Lipid A biosynthesis (KDO)2-(lauroyl)-lipid IVA acyltransferase	M	CELLULAR PROCESSES AND SIGNALING	Cell wall/membrane/envelope biogenesis
VC_1106	243.018	-0.4962	0.150745	-3.29165	0.000996015	0.00212569	VC_1106	-	putative metal-binding protein related to the C-terminal domain of SecA	R, U	POORLY CHARACTERIZED, CELLULAR PROCESSES AND SIGNALING	General function prediction only, Intracellular trafficking, secretion, and vesicular transport
VC_A0216	1280.97	-0.496985	0.106963	-4.64633	3.37888e-06	9.9588e-06	VC_A0216	-	-	-	-	-
VC_A0355	4373.73	-0.497525	0.0819036	-6.07453	1.24355e-09	5.12368e-09	VC_A0355	-	Putative threonine efflux protein	E	METABOLISM	Amino acid transport and metabolism
VC_1346	530.885	-0.49857	0.145548	-3.42547	0.000613741	0.00135413	VC_1346	-	putative 2-keto-4-pentenoate hydratase/2-oxohepta-3-ene-1,7-dioic acid hydratase/ Fumarylacetoacetase	Q	METABOLISM	Secondary metabolites biosynthesis, transport and catabolism
VC_2099	543.49	-0.499365	0.156217	-3.19661	0.00139053	0.00289615	VC_2099	fldA	flavodoxin 1	C	METABOLISM	Energy production and conversion
VC_0476	7041.21	-0.501227	0.0900975	-5.56317	2.64921e-08	9.7984e-08	VC_0476	epd	D-erythrose 4-phosphate dehydrogenase	G	METABOLISM	Carbohydrate transport and metabolism
VC_A0910	1102.71	-0.502436	0.109941	-4.57004	4.8762e-06	1.41105e-05	VC_A0910	tonB	Protein tonB	M	CELLULAR PROCESSES AND SIGNALING	Cell wall/membrane/envelope biogenesis
VC_1928	1368.67	-0.50251	0.103887	-4.83708	1.3176e-06	4.07053e-06	VC_1928	-	putative TRAP-type C4-dicarboxylate transport system, small permease component	G	METABOLISM	Carbohydrate transport and metabolism
VC_A0025	1608.79	-0.503584	0.0929099	-5.42013	5.95556e-08	2.13712e-07	VC_A0025	-	putative Di-and tricarboxylate transporter	P	METABOLISM	Inorganic ion transport and metabolism
VC_0116	573.599	-0.50478	0.126259	-3.99799	6.38837e-05	0.000162094	VC_0116	hemN	Oxygen-independent coproporphyrinogen-III oxidase	H	METABOLISM	Coenzyme transport and metabolism
VC_1642	1273.66	-0.505257	0.112057	-4.50894	6.51533e-06	1.85433e-05	VC_1642	-	-	-	-	-
VC_0693	440.197	-0.505761	0.122756	-4.12005	3.78789e-05	9.8243e-05	VC_0693	-	putative Response regulator of the LytR family	K, T	INFORMATION STORAGE AND PROCESSING, CELLULAR PROCESSES AND SIGNALING	Transcription, Signal transduction mechanisms
VC_1180	257.564	-0.506321	0.158475	-3.19496	0.00139849	0.00291121	VC_1180	cydC	ATP-binding/permease protein CydC	C, O	METABOLISM, CELLULAR PROCESSES AND SIGNALING	Energy production and conversion, Posttranslational modification, protein turnover, chaperones
VC_1304	848.786	-0.508826	0.120141	-4.23525	2.28297e-05	6.092e-05	VC_1304	-	putative fumarate hydratase class I, aerobic	C	METABOLISM	Energy production and conversion
VC_A1091	443.468	-0.511734	0.131177	-3.90109	9.576e-05	0.000237075	VC_A1091	-	putative Chemotaxis protein methyltransferase CheR	N, T	CELLULAR PROCESSES AND SIGNALING, CELLULAR PROCESSES AND SIGNALING	Cell motility, Signal transduction mechanisms
VC_1518	15916	-0.514638	0.0940166	-5.4739	4.40229e-08	1.60142e-07	VC_1518	-	-	-	-	-
VC_1899	1932.07	-0.516643	0.122344	-4.22288	2.41202e-05	6.42344e-05	VC_1899	-	-	-	-	-
VC_A0199	1024.43	-0.51758	0.103252	-5.0128	5.3643e-07	1.7145e-06	VC_A0199	-	conserved hypothetical protein	S	POORLY CHARACTERIZED	Function unknown
VC_A0947	938.917	-0.518856	0.0998512	-5.1963	2.03298e-07	6.8734e-07	VC_A0947	speG	Spermidine N(1)-acetyltransferase	J	INFORMATION STORAGE AND PROCESSING	Translation, ribosomal structure and biogenesis
VC_A1077	407.523	-0.520686	0.125235	-4.15766	3.21517e-05	8.40469e-05	VC_A1077	-	conserved hypothetical protein of unknown function	D, S	CELLULAR PROCESSES AND SIGNALING, POORLY CHARACTERIZED	Cell cycle control, cell division, chromosome partitioning, Function unknown
VC_1156	675.083	-0.521441	0.11465	-4.54813	5.41252e-06	1.55718e-05	VC_1156	-	fragment of putative TWO COMPONENT HISTIDINE KINASE (part 2)	T	CELLULAR PROCESSES AND SIGNALING	Signal transduction mechanisms
VC_1439	433.175	-0.523327	0.122755	-4.26318	2.01536e-05	5.41059e-05	VC_1439	ccoP	Cytochrome c oxidase diheme subunit	C	METABOLISM	Energy production and conversion
VC_1560	210.437	-0.523618	0.159027	-3.29265	0.00099249	0.0021193	VC_1560	katG	Catalase-peroxidase	P	METABOLISM	Inorganic ion transport and metabolism
VC_0654	369.517	-0.523804	0.137969	-3.79653	0.000146735	0.000353587	VC_0654	-	putative lipid carrier protein	I	METABOLISM	Lipid transport and metabolism
VC_0591	1229.55	-0.524431	0.114299	-4.58823	4.47023e-06	1.30115e-05	VC_0591	panC	Pantothenate synthetase	H	METABOLISM	Coenzyme transport and metabolism
VC_0005	337.801	-0.527104	0.13071	-4.03262	5.51589e-05	0.000140494	VC_0005	-	conserved hypothetical protein	S	POORLY CHARACTERIZED	Function unknown
VC_A0135	269.816	-0.529891	0.161455	-3.28197	0.00103086	0.00219181	VC_A0135	-	putative N-ribosylNicotinamide CRP-like regulator	T	CELLULAR PROCESSES AND SIGNALING	Signal transduction mechanisms
VC_1391	582.006	-0.530524	0.112778	-4.70412	2.54958e-06	7.61616e-06	VC_1391	-	putative Multidrug transporter	E, G, P, R	METABOLISM, METABOLISM, METABOLISM, POORLY CHARACTERIZED	Amino acid transport and metabolism, Carbohydrate transport and metabolism, Inorganic ion transport and metabolism, General function prediction only
VC_1274	712.055	-0.531742	0.11963	-4.4449	8.79324e-06	2.46211e-05	VC_1274	-	putative TRAP-type C4-dicarboxylate transport system, small permease component	Q	METABOLISM	Secondary metabolites biosynthesis, transport and catabolism
VC_A0552	213.109	-0.533802	0.162388	-3.2872	0.00101188	0.00215491	VC_A0552	-	-	-	-	-
VC_1757	1106.83	-0.535304	0.101071	-5.29633	1.18153e-07	4.09927e-07	VC_1757	vexD	Multidrug efflux transporter VexD	V	CELLULAR PROCESSES AND SIGNALING	Defense mechanisms
VC_2509	150.32	-0.536858	0.177247	-3.02887	0.00245471	0.00490943	VC_2509	-	-	-	-	-
VC_1961	3044.19	-0.536897	0.142972	-3.75527	0.000173156	0.000411025	VC_1961	minE	cell division topological specificity factor	D	CELLULAR PROCESSES AND SIGNALING	Cell cycle control, cell division, chromosome partitioning
VC_2326	407.395	-0.536919	0.159025	-3.37632	0.000734611	0.00159782	VC_2326	-	putative YebG protein	S	POORLY CHARACTERIZED	Function unknown
VC_1308	2299.07	-0.539885	0.110995	-4.86406	1.15005e-06	3.58498e-06	VC_1308	tyrR	Transcriptional regulatory protein tyrR	E, K	METABOLISM, INFORMATION STORAGE AND PROCESSING	Amino acid transport and metabolism, Transcription
VC_2749	2405.69	-0.540666	0.0972748	-5.55813	2.72674e-08	1.00664e-07	VC_2749	glnG	Nitrogen regulation protein NR(I)	T	CELLULAR PROCESSES AND SIGNALING	Signal transduction mechanisms
VC_1371	304.37	-0.541604	0.153029	-3.53922	0.000401308	0.000910212	VC_1371	-	-	-	-	-
VC_A1020	229.75	-0.542298	0.15832	-3.42533	0.000614057	0.00135413	VC_A1020	-	Putative Transcriptional regulator, LysR family	K	INFORMATION STORAGE AND PROCESSING	Transcription
VC_0758	1842.18	-0.542539	0.0965164	-5.62121	1.89619e-08	7.10581e-08	VC_0758	rodZ	conserved hypothetical protein	S	POORLY CHARACTERIZED	Function unknown
VC_2453	327.317	-0.543541	0.140506	-3.86845	0.000109529	0.00026882	VC_2453	barA	Signal transduction histidine-protein kinase barA	T	CELLULAR PROCESSES AND SIGNALING	Signal transduction mechanisms
VC_0901	347.376	-0.543947	0.130686	-4.16225	3.15131e-05	8.25947e-05	VC_0901	-	putative TPR-repeat-containing protein	R	POORLY CHARACTERIZED	General function prediction only
VC_A0627	1794.44	-0.544361	0.111084	-4.90044	9.56224e-07	3.00075e-06	VC_A0627	-	putative rRNA methylase	J	INFORMATION STORAGE AND PROCESSING	Translation, ribosomal structure and biogenesis
VC_1425	3684.52	-0.545841	0.0945709	-5.77177	7.84435e-09	3.02513e-08	VC_1425	potD	Spermidine/putrescine-binding periplasmic protein	E	METABOLISM	Amino acid transport and metabolism
VC_A0486	255.813	-0.546216	0.155695	-3.50825	0.00045107	0.0010167	VC_A0486	-	-	-	-	-
VC_0843	491.902	-0.546425	0.125091	-4.36821	1.25269e-05	3.44924e-05	VC_0843	-	putative TagE protein or Peptidase M23B	M	CELLULAR PROCESSES AND SIGNALING	Cell wall/membrane/envelope biogenesis
VC_1773	690.262	-0.546622	0.108795	-5.02431	5.05238e-07	1.62055e-06	VC_1773	-	putative Sialic acid-induced transmembrane protein YjhT(NanM), possible mutarotase	S	POORLY CHARACTERIZED	Function unknown
VC_1062	4885.85	-0.546762	0.116998	-4.67324	2.96484e-06	8.79717e-06	VC_1062	ybaO	Uncharacterized HTH-type transcriptional regulator ybaO	K	INFORMATION STORAGE AND PROCESSING	Transcription
VC_2347	329.241	-0.548251	0.139663	-3.92553	8.65392e-05	0.000215724	VC_2347	deoD	Purine nucleoside phosphorylase deoD-type	F	METABOLISM	Nucleotide transport and metabolism
VC_2231	813.337	-0.549622	0.107446	-5.11533	3.13196e-07	1.03342e-06	VC_2231	fadE	Acyl-coenzyme A dehydrogenase	I	METABOLISM	Lipid transport and metabolism
VC_2145	2307.67	-0.549773	0.121069	-4.541	5.59892e-06	1.60731e-05	VC_2145	-	putative iron-dependent peroxidase	P	METABOLISM	Inorganic ion transport and metabolism
VC_0724	342.999	-0.549976	0.137983	-3.98583	6.72437e-05	0.000169969	VC_0724	pstC	transmembrane component of the phosphate specific transport complex	R	POORLY CHARACTERIZED	General function prediction only
VC_A0545	260.736	-0.55049	0.153409	-3.58838	0.000332745	0.000762094	VC_A0545	-	putative 5'-nucleotidase	F	METABOLISM	Nucleotide transport and metabolism
VC_A0714	178.998	-0.550956	0.173688	-3.17209	0.00151344	0.00312594	VC_A0714	dgkA	Diacylglycerol kinase	M	CELLULAR PROCESSES AND SIGNALING	Cell wall/membrane/envelope biogenesis
VC_1254	410.959	-0.551596	0.138524	-3.98196	6.83485e-05	0.000172542	VC_1254	-	putative 2Fe-2S iron-sulfur cluster binding domain protein	C	METABOLISM	Energy production and conversion
VC_A0192	744.887	-0.553119	0.105047	-5.26544	1.39851e-07	4.81428e-07	VC_A0192	ldhA	D-lactate dehydrogenase	C, H, R	METABOLISM, METABOLISM, POORLY CHARACTERIZED	Energy production and conversion, Coenzyme transport and metabolism, General function prediction only
VC_1940	239.368	-0.554259	0.176454	-3.14111	0.00168311	0.00345306	VC_1940	-	putative Phosphoserine phosphatase	E	METABOLISM	Amino acid transport and metabolism
VC_A0805	260.058	-0.554495	0.152618	-3.63322	0.000279902	0.000648159	VC_A0805	rnb	Exoribonuclease 2	K	INFORMATION STORAGE AND PROCESSING	Transcription
VC_1323	503.532	-0.5556	0.126606	-4.38843	1.1417e-05	3.15675e-05	VC_1323	-	conserved hypothetical protein	S	POORLY CHARACTERIZED	Function unknown
VC_1453	2381.45	-0.55678	0.0963887	-5.77641	7.63135e-09	2.94871e-08	VC_1453	-	-	-	-	-
VC_0851	261.571	-0.558993	0.154839	-3.61017	0.000306002	0.00070368	VC_0851	smpA	small protein A	J	INFORMATION STORAGE AND PROCESSING	Translation, ribosomal structure and biogenesis
VC_1708	3754.19	-0.559009	0.150472	-3.71504	0.000203169	0.000478838	VC_1708	-	putative Permease of the major facilitator superfamily	E, G, P, R	METABOLISM, METABOLISM, METABOLISM, POORLY CHARACTERIZED	Amino acid transport and metabolism, Carbohydrate transport and metabolism, Inorganic ion transport and metabolism, General function prediction only
VC_1897	471.686	-0.56025	0.125567	-4.46175	8.12919e-06	2.2826e-05	VC_1897	hinT	Histidine triad nucleotide-binding protein 1 (Adenosine 5'-monophosphoramidase)	F, G, R	METABOLISM, METABOLISM, POORLY CHARACTERIZED	Nucleotide transport and metabolism, Carbohydrate transport and metabolism, General function prediction only
VC_0186	317.682	-0.561268	0.149452	-3.75552	0.000172984	0.000410862	VC_0186	gor	glutathione reductase	C	METABOLISM	Energy production and conversion
VC_A1047	1609.59	-0.561545	0.104557	-5.37072	7.84242e-08	2.77662e-07	VC_A1047	-	Putative Mannitol operon repressor MltR	K	INFORMATION STORAGE AND PROCESSING	Transcription
VC_1514	536.898	-0.561685	0.128415	-4.37398	1.22003e-05	3.36864e-05	VC_1514	-	-	-	-	-
VC_0088	1517.69	-0.562669	0.102817	-5.47253	4.43658e-08	1.61242e-07	VC_0088	tatC	Sec-independent protein translocase protein tatC	U	CELLULAR PROCESSES AND SIGNALING	Intracellular trafficking, secretion, and vesicular transport
VC_A0286	1288	-0.562965	0.122582	-4.59257	4.37813e-06	1.27527e-05	VC_A0286	-	-	-	-	-
VC_0118	388.913	-0.563744	0.125279	-4.49992	6.79793e-06	1.93017e-05	VC_0118	hemX	uroporphyrin-III C-methyltransferase	H	METABOLISM	Coenzyme transport and metabolism
VC_0200	1951.95	-0.563893	0.10464	-5.38887	7.09026e-08	2.52833e-07	VC_0200	fhuA	Ferrichrome outer membrane receptor FhuA	P	METABOLISM	Inorganic ion transport and metabolism
VC_0720	1526.27	-0.564591	0.0948397	-5.95311	2.63101e-09	1.05772e-08	VC_0720	phoR	Phosphate regulon sensor protein phoR	T	CELLULAR PROCESSES AND SIGNALING	Signal transduction mechanisms
VC_2141	2697.5	-0.565214	0.086384	-6.54304	6.02795e-11	2.72974e-10	VC_2141	flaG	Protein flaG	N	CELLULAR PROCESSES AND SIGNALING	Cell motility
VC_A0185	229.565	-0.566045	0.1506	-3.75859	0.000170871	0.000406572	VC_A0185	-	conserved hypothetical protein	S	POORLY CHARACTERIZED	Function unknown
VC_2603	966.496	-0.566812	0.106677	-5.31338	1.07613e-07	3.75983e-07	VC_2603	iaaA	Isoaspartyl peptidase	E	METABOLISM	Amino acid transport and metabolism
VC_1494	2048.04	-0.568453	0.0895664	-6.34672	2.19954e-10	9.5162e-10	VC_1494	pepN	aminopeptidase N	E	METABOLISM	Amino acid transport and metabolism
VC_A0847	456.726	-0.57188	0.147083	-3.88814	0.000101015	0.000249309	VC_A0847	-	putative Amino acid/polyamine transporter I	E	METABOLISM	Amino acid transport and metabolism
VC_0826	335.329	-0.57602	0.132335	-4.35273	1.34455e-05	3.68686e-05	VC_0826	tcpP	Toxin coregulated pilus biosynthesis protein P	K, T	INFORMATION STORAGE AND PROCESSING, CELLULAR PROCESSES AND SIGNALING	Transcription, Signal transduction mechanisms
VC_2154	6332.16	-0.576582	0.0878051	-6.56661	5.14743e-11	2.35243e-10	VC_2154	-	-	-	-	-
VC_0748	4008.83	-0.576851	0.0840424	-6.8638	6.7051e-12	3.30353e-11	VC_0748	iscS	Cysteine desulfurase	E	METABOLISM	Amino acid transport and metabolism
VC_A0894	408.797	-0.577659	0.139644	-4.13666	3.52401e-05	9.15782e-05	VC_A0894	-	putative Polymerase and histidinol phosphatase-like protein	E, R	METABOLISM, POORLY CHARACTERIZED	Amino acid transport and metabolism, General function prediction only
VC_0428	4639.95	-0.577729	0.113717	-5.08042	3.76593e-07	1.22833e-06	VC_0428	-	putative Universal stress protein UspA	T	CELLULAR PROCESSES AND SIGNALING	Signal transduction mechanisms
VC_A1114	322.068	-0.579133	0.133716	-4.33106	1.48393e-05	4.05506e-05	VC_A1114	parB	Chromosome (plasmid) partitioning protein ParB	K	INFORMATION STORAGE AND PROCESSING	Transcription
VC_A0359	1025.65	-0.579937	0.107354	-5.40212	6.58566e-08	2.35473e-07	VC_A0359	-	Plasmid stabilization system ParE protein (toxin of TA system ParD-ParE)	R	POORLY CHARACTERIZED	General function prediction only
VC_A0957	3436.86	-0.581228	0.0870925	-6.67369	2.49457e-11	1.17378e-10	VC_A0957	-	putative Malate synthase	C	METABOLISM	Energy production and conversion
VC_A0155	982.245	-0.581927	0.102375	-5.68429	1.31355e-08	4.99777e-08	VC_A0155	-	putative Na(+) H(+) antiporter subunit D	C, P	METABOLISM, METABOLISM	Energy production and conversion, Inorganic ion transport and metabolism
VC_A1019	1798.43	-0.582445	0.0922162	-6.31608	2.68276e-10	1.15565e-09	VC_A1019	-	conserved hypothetical protein	S	POORLY CHARACTERIZED	Function unknown
VC_2503	807.167	-0.582592	0.122667	-4.74938	2.04042e-06	6.14135e-06	VC_2503	valS	valyl-tRNA synthetase (Valine--tRNA ligase) (ValRS)	J	INFORMATION STORAGE AND PROCESSING	Translation, ribosomal structure and biogenesis
VC_0329	532.639	-0.584263	0.118037	-4.94982	7.4281e-07	2.35896e-06	VC_0329	rpoC	DNA-directed RNA polymerase subunit beta'	K	INFORMATION STORAGE AND PROCESSING	Transcription
VC_0451	257.367	-0.584675	0.15574	-3.75418	0.000173909	0.000412321	VC_0451	-	putative Fe(II) trafficking protein YggX	C, O	METABOLISM, CELLULAR PROCESSES AND SIGNALING	Energy production and conversion, Posttranslational modification, protein turnover, chaperones
VC_1139	650.803	-0.585462	0.121438	-4.82109	1.42777e-06	4.39043e-06	VC_1139	hisI	Histidine biosynthesis bifunctional protein hisIE [Includes: Phosphoribosyl-AMP cyclohydrolase ; Phosphoribosyl-ATP pyrophosphatase]	E	METABOLISM	Amino acid transport and metabolism
VC_0389	8606.12	-0.586858	0.126184	-4.6508	3.30653e-06	9.76003e-06	VC_0389	-	putative Na+/H+ antiporter	P	METABOLISM	Inorganic ion transport and metabolism
VC_1197	278.845	-0.591541	0.150827	-3.92199	8.78205e-05	0.000218644	VC_1197	-	-	-	-	-
VC_1047	239.047	-0.592691	0.171615	-3.4536	0.000553156	0.00122955	VC_1047	fadJ	Fatty acid oxidation complex subunit alpha [Includes: Enoyl-CoA hydratase/3-hydroxybutyryl-CoA epimerase ; 3-hydroxyacyl-CoA dehydrogenase]	I	METABOLISM	Lipid transport and metabolism
VC_0478	3489.4	-0.59395	0.111836	-5.3109	1.09085e-07	3.80123e-07	VC_0478	fbaA	Fructose-bisphosphate aldolase class 2	G	METABOLISM	Carbohydrate transport and metabolism
VC_0117	1470.65	-0.595552	0.107817	-5.52374	3.31864e-08	1.21612e-07	VC_0117	hemY	hemY protein	H	METABOLISM	Coenzyme transport and metabolism
VC_0137	891.426	-0.595942	0.123158	-4.83885	1.30593e-06	4.03761e-06	VC_0137	-	putative Metal-dependent phosphohydrolase (Predicted signal transduction protein)	T	CELLULAR PROCESSES AND SIGNALING	Signal transduction mechanisms
VC_0172	241.893	-0.596228	0.170253	-3.502	0.000461773	0.00103905	VC_0172	-	putative ABC-type dipeptide/oligopeptide/nickel transport systems, permease component	E, P	METABOLISM, METABOLISM	Amino acid transport and metabolism, Inorganic ion transport and metabolism
VC_1263	13868.9	-0.596406	0.107327	-5.55689	2.74616e-08	1.01287e-07	VC_1263	ribA	GTP cyclohydrolase-2	H	METABOLISM	Coenzyme transport and metabolism
VC_A0080	1511.71	-0.599703	0.0914486	-6.55781	5.46022e-11	2.48681e-10	VC_A0080	-	putative GGDEF family protein	T	CELLULAR PROCESSES AND SIGNALING	Signal transduction mechanisms
VC_A0623	245.118	-0.599876	0.15814	-3.79332	0.000148649	0.000357334	VC_A0623	talB	transaldolase B	G	METABOLISM	Carbohydrate transport and metabolism
VC_1121	640.13	-0.600483	0.139458	-4.30584	1.66353e-05	4.50558e-05	VC_1121	-	conserved hypothetical protein	S	POORLY CHARACTERIZED	Function unknown
VC_0163	171.655	-0.600732	0.177104	-3.39198	0.0006939	0.00151507	VC_0163	-	conserved hypothetical protein	S	POORLY CHARACTERIZED	Function unknown
VC_2701	1199.02	-0.601657	0.117649	-5.11402	3.15378e-07	1.03975e-06	VC_2701	dsbD	Thiol:disulfide interchange protein DsbD	C, O	METABOLISM, CELLULAR PROCESSES AND SIGNALING	Energy production and conversion, Posttranslational modification, protein turnover, chaperones
VC_2600	118.319	-0.602534	0.20689	-2.91234	0.00358731	0.00702964	VC_2600	-	putative Membrane sulphatase	R	POORLY CHARACTERIZED	General function prediction only
VC_1330	1209.51	-0.602882	0.129556	-4.65343	3.26455e-06	9.65045e-06	VC_1330	-	-	-	-	-
VC_1603	157.455	-0.602991	0.208151	-2.89689	0.00376886	0.00734375	VC_1603	-	putative ABC-type amino acid transport, signal transduction systems, periplasmic component/domain	E, T	METABOLISM, CELLULAR PROCESSES AND SIGNALING	Amino acid transport and metabolism, Signal transduction mechanisms
VC_2350	27902.2	-0.603274	0.100118	-6.02564	1.6844e-09	6.82687e-09	VC_2350	deoC	Deoxyribose-phosphate aldolase	F	METABOLISM	Nucleotide transport and metabolism
VC_2252	172.348	-0.603838	0.19939	-3.02843	0.00245828	0.00491409	VC_2252	yaeT	Outer membrane protein assembly factor yaeT	M	CELLULAR PROCESSES AND SIGNALING	Cell wall/membrane/envelope biogenesis
VC_0268	185.045	-0.604052	0.174518	-3.46127	0.000537638	0.00119891	VC_0268	-	conserved hypothetical protein	S	POORLY CHARACTERIZED	Function unknown
VC_A0319	486.423	-0.604187	0.130284	-4.63745	3.52737e-06	1.03734e-05	VC_A0319	-	Plasmid stabilization 319 protein (anti-toxin protein of TA system 318-319)	S	POORLY CHARACTERIZED	Function unknown
VC_0641	579.792	-0.605254	0.127289	-4.75497	1.98474e-06	5.97827e-06	VC_0641	rimP	Ribosome maturation factor rimP	S	POORLY CHARACTERIZED	Function unknown
VC_0377	112.883	-0.606462	0.208468	-2.90914	0.00362422	0.00709848	VC_0377	-	putative inhibitor of MCP methylation, homolog of CheC	N	CELLULAR PROCESSES AND SIGNALING	Cell motility
VC_1974	20237.9	-0.609653	0.120158	-5.07374	3.90071e-07	1.27021e-06	VC_1974	-	putative 2-succinyl-6-hydroxy-2,4-cyclohexadiene-1-carboxylate synthase MenH	R	POORLY CHARACTERIZED	General function prediction only
VC_A0590	665.982	-0.61008	0.115181	-5.29672	1.17903e-07	4.09416e-07	VC_A0590	-	putative ABC-type dipeptide/oligopeptide/nickel transport systems, permease component	R	POORLY CHARACTERIZED	General function prediction only
VC_1643	10634.2	-0.612675	0.0934106	-6.55895	5.41875e-11	2.47075e-10	VC_1643	-	putative Methyl-accepting chemotaxis protein	N, T	CELLULAR PROCESSES AND SIGNALING, CELLULAR PROCESSES AND SIGNALING	Cell motility, Signal transduction mechanisms
VC_1976	1190.13	-0.616702	0.0943085	-6.5392	6.18492e-11	2.79446e-10	VC_1976	-	putative Menaquinone-specific isochorismate synthase MenF	H, Q	METABOLISM, METABOLISM	Coenzyme transport and metabolism, Secondary metabolites biosynthesis, transport and catabolism
VC_2469	325.577	-0.61917	0.158256	-3.91246	9.136e-05	0.000226746	VC_2469	nadB	L-aspartate oxidase	H	METABOLISM	Coenzyme transport and metabolism
VC_2433	3175.25	-0.621255	0.0906206	-6.85556	7.10337e-12	3.48679e-11	VC_2433	cpdA	3',5'-cyclic adenosine monophosphate phosphodiesterase CpdA	R	POORLY CHARACTERIZED	General function prediction only
VC_A0837	301.605	-0.621338	0.141724	-4.38415	1.1644e-05	3.21728e-05	VC_A0837	-	putative Hemolysin and related protein containing CBS domain	R	POORLY CHARACTERIZED	General function prediction only
VC_0032	1336.22	-0.623285	0.107889	-5.7771	7.59983e-09	2.93939e-08	VC_0032	comM	Competence protein comM	O	CELLULAR PROCESSES AND SIGNALING	Posttranslational modification, protein turnover, chaperones
VC_A1041	141.25	-0.623883	0.191901	-3.25107	0.0011497	0.00242377	VC_A1041	-	putative Phosphomannomutase	G	METABOLISM	Carbohydrate transport and metabolism
VC_1140	933.515	-0.62503	0.130599	-4.78586	1.70259e-06	5.18734e-06	VC_1140	rluE	Ribosomal large subunit pseudouridine synthase E	J	INFORMATION STORAGE AND PROCESSING	Translation, ribosomal structure and biogenesis
VC_2193	691.906	-0.625445	0.115997	-5.3919	6.97176e-08	2.49054e-07	VC_2193	flgI	Flagellar P-ring protein	N	CELLULAR PROCESSES AND SIGNALING	Cell motility
VC_0299	107.509	-0.626077	0.216614	-2.8903	0.0038488	0.00749038	VC_0299	-	putative DnaQ-like (or DEDD) exonuclease	L	INFORMATION STORAGE AND PROCESSING	Replication, recombination and repair
VC_A1085	10511.6	-0.62643	0.0898632	-6.97093	3.14856e-12	1.59068e-11	VC_A1085	-	Putative polymerase	L	INFORMATION STORAGE AND PROCESSING	Replication, recombination and repair
VC_A0676	766.052	-0.627747	0.148981	-4.2136	2.51336e-05	6.67544e-05	VC_A0676	-	putative Ferredoxin-type protein NapF (periplasmic nitrate reductase)	C	METABOLISM	Energy production and conversion
VC_2391	2694.25	-0.62841	0.091684	-6.85408	7.17737e-12	3.51877e-11	VC_2391	dapB	4-hydroxy-tetrahydrodipicolinate reductase	E	METABOLISM	Amino acid transport and metabolism
VC_0684	589.216	-0.629416	0.113073	-5.56646	2.59972e-08	9.6243e-08	VC_0684	fkpB	FKBP-type 16 kDa peptidyl-prolyl cis-trans isomerase	O	CELLULAR PROCESSES AND SIGNALING	Posttranslational modification, protein turnover, chaperones
VC_0309	197.37	-0.631437	0.16278	-3.87909	0.000104848	0.000257807	VC_0309	-	putative 3-polyprenyl-4-hydroxybenzoate carboxy-lyase	H	METABOLISM	Coenzyme transport and metabolism
VC_A0863	127.419	-0.632143	0.203271	-3.10985	0.00187183	0.00381444	VC_A0863	cef	CHO cell elongating factor	R	POORLY CHARACTERIZED	General function prediction only
VC_1513	725.723	-0.63245	0.121663	-5.19837	2.01048e-07	6.80893e-07	VC_1513	fdhA	fragment of Formate dehydrogenase subunit A (part 2)	C	METABOLISM	Energy production and conversion
VC_0056	2375.94	-0.632471	0.109362	-5.78327	7.32626e-09	2.8391e-08	VC_0056	aroE	Shikimate dehydrogenase	E	METABOLISM	Amino acid transport and metabolism
VC_1993	185.481	-0.633834	0.165287	-3.83474	0.000125697	0.000306234	VC_1993	fadH	2,4-dienoyl-CoA reductase [NADPH]	C, R	METABOLISM, POORLY CHARACTERIZED	Energy production and conversion, General function prediction only
VC_0651	285.523	-0.633885	0.154909	-4.09198	4.2771e-05	0.000109998	VC_0651	-	putative Peptidase U32	O	CELLULAR PROCESSES AND SIGNALING	Posttranslational modification, protein turnover, chaperones
VC_1731	151.966	-0.634272	0.185883	-3.41221	0.000644381	0.00141472	VC_1731	-	-	-	-	-
VC_1182	367.702	-0.635187	0.151344	-4.19697	2.70516e-05	7.15616e-05	VC_1182	trxB	thioredoxin reductase	O	CELLULAR PROCESSES AND SIGNALING	Posttranslational modification, protein turnover, chaperones
VC_0575	1285.97	-0.636683	0.0995748	-6.39402	1.61581e-10	7.05987e-10	VC_0575	-	putative cytochrome c1	C	METABOLISM	Energy production and conversion
VC_0813	511.504	-0.639465	0.121808	-5.24979	1.52271e-07	5.21921e-07	VC_0813	-	putative Tellurite resistance protein-related protein	Q, R	METABOLISM, POORLY CHARACTERIZED	Secondary metabolites biosynthesis, transport and catabolism, General function prediction only
VC_A0691	3139.45	-0.63956	0.148121	-4.31784	1.57567e-05	4.291e-05	VC_A0691	phaB	acetoacetyl-CoA reductase	I, Q, R	METABOLISM, METABOLISM, POORLY CHARACTERIZED	Lipid transport and metabolism, Secondary metabolites biosynthesis, transport and catabolism, General function prediction only
VC_1031	1793.32	-0.640971	0.0882613	-7.2622	3.80835e-13	2.07709e-12	VC_1031	-	putative Cystathionine-beta-synthase	R	POORLY CHARACTERIZED	General function prediction only
VC_2552	687.108	-0.641169	0.119764	-5.35361	8.62151e-08	3.04163e-07	VC_2552	-	conserved hypothetical protein	P	METABOLISM	Inorganic ion transport and metabolism
VC_1374	261.591	-0.64163	0.169802	-3.7787	0.000157652	0.00037806	VC_1374	-	putative Heat shock protein Hsp70	O	CELLULAR PROCESSES AND SIGNALING	Posttranslational modification, protein turnover, chaperones
VC_0248	612.257	-0.644393	0.111135	-5.79829	6.69937e-09	2.60378e-08	VC_0248	-	putative acyl carrier protein	I, Q	METABOLISM, METABOLISM	Lipid transport and metabolism, Secondary metabolites biosynthesis, transport and catabolism
VC_2533	459.233	-0.645133	0.152569	-4.22847	2.35289e-05	6.27016e-05	VC_2533	ptsO	Phosphocarrier protein NPr	G	METABOLISM	Carbohydrate transport and metabolism
VC_A0737	3658.41	-0.645139	0.0891495	-7.23661	4.60052e-13	2.48866e-12	VC_A0737	luxP	Autoinducer 2-binding periplasmic protein luxP	G	METABOLISM	Carbohydrate transport and metabolism
VC_1456	522.484	-0.645249	0.122406	-5.27139	1.35392e-07	4.66885e-07	VC_1456	-	-	-	-	-
VC_0579	816.249	-0.646473	0.113829	-5.67932	1.35233e-08	5.13549e-08	VC_0579	diaA	DnaA initiator-associating protein diaA	G	METABOLISM	Carbohydrate transport and metabolism
VC_1124	652.448	-0.646766	0.131913	-4.90297	9.44008e-07	2.96475e-06	VC_1124	-	-	-	-	-
VC_A0862	95.0642	-0.646961	0.225118	-2.87388	0.00405463	0.007864	VC_A0862	-	putative Long-chain fatty acid transport protein	I	METABOLISM	Lipid transport and metabolism
VC_0625	578.099	-0.64771	0.115609	-5.60261	2.11153e-08	7.87563e-08	VC_0625	-	-	-	-	-
VC_1259	1373.26	-0.647795	0.143729	-4.50706	6.57312e-06	1.86944e-05	VC_1259	-	putative Rhodanese-related sulfurtransferase	R	POORLY CHARACTERIZED	General function prediction only
VC_1049	503.115	-0.648031	0.160682	-4.03301	5.50679e-05	0.000140353	VC_1049	aphB	AphB	K	INFORMATION STORAGE AND PROCESSING	Transcription
VC_1673	149.66	-0.648232	0.184528	-3.51293	0.000443202	0.0010001	VC_1673	-	putative Acriflavin resistance protein	V	CELLULAR PROCESSES AND SIGNALING	Defense mechanisms
VC_1791	272.875	-0.6495	0.15781	-4.11572	3.85975e-05	9.98463e-05	VC_1791	-	putative Mu-like prophage protein	R	POORLY CHARACTERIZED	General function prediction only
VC_0576	2778.5	-0.650422	0.116585	-5.57894	2.4199e-08	8.98368e-08	VC_0576	sspA	stringent starvation protein A	O	CELLULAR PROCESSES AND SIGNALING	Posttranslational modification, protein turnover, chaperones
VC_0045	415.627	-0.650962	0.13247	-4.91404	8.92192e-07	2.81313e-06	VC_0045	fmt	Methionyl-tRNA formyltransferase	J	INFORMATION STORAGE AND PROCESSING	Translation, ribosomal structure and biogenesis
VC_A0809	3006.03	-0.653743	0.0967542	-6.75674	1.41128e-11	6.8015e-11	VC_A0809	-	putative Deoxyribodipyrimidine photolyase-related protein	R	POORLY CHARACTERIZED	General function prediction only
VC_0044	349.592	-0.653834	0.13989	-4.67392	2.95509e-06	8.7748e-06	VC_0044	rsmB	Ribosomal RNA small subunit methyltransferase B	J	INFORMATION STORAGE AND PROCESSING	Translation, ribosomal structure and biogenesis
VC_2205	1283.61	-0.656771	0.126363	-5.1975	2.01983e-07	6.83475e-07	VC_2205	-	-	-	-	-
VC_1902	182.799	-0.657733	0.181056	-3.63277	0.000280398	0.000648931	VC_1902	dsbB	Disulfide bond formation protein B	O	CELLULAR PROCESSES AND SIGNALING	Posttranslational modification, protein turnover, chaperones
VC_0655	1023.19	-0.659018	0.106798	-6.17072	6.798e-10	2.8602e-09	VC_0655	yhbS	putative Acyl-CoA N-acyltransferase	R	POORLY CHARACTERIZED	General function prediction only
VC_1769	851.676	-0.659615	0.126121	-5.23003	1.69484e-07	5.78427e-07	VC_1769	-	putative Type I restriction-modification system, DNA-methyltransferase subunit M	V	CELLULAR PROCESSES AND SIGNALING	Defense mechanisms
VC_1380	8702.13	-0.660375	0.146756	-4.49982	6.80124e-06	1.93017e-05	VC_1380	-	-	-	-	-
VC_0514	1919.07	-0.660676	0.100977	-6.54285	6.03592e-11	2.73024e-10	VC_0514	-	putative methyl-accepting chemotaxis protein	N, T	CELLULAR PROCESSES AND SIGNALING, CELLULAR PROCESSES AND SIGNALING	Cell motility, Signal transduction mechanisms
VC_1056	4203.96	-0.660874	0.0842718	-7.84217	4.42812e-15	2.808e-14	VC_1056	recR	Recombination protein recR	L	INFORMATION STORAGE AND PROCESSING	Replication, recombination and repair
VC_1772	586.609	-0.661871	0.117908	-5.61344	1.9834e-08	7.41167e-08	VC_1772	-	putative transcriptional regulator	K	INFORMATION STORAGE AND PROCESSING	Transcription
VC_A1088	2003.96	-0.662172	0.117897	-5.61653	1.94835e-08	7.28751e-08	VC_A1088	-	putative Methyl-accepting chemotaxis protein	N, T	CELLULAR PROCESSES AND SIGNALING, CELLULAR PROCESSES AND SIGNALING	Cell motility, Signal transduction mechanisms
VC_1876	2094.52	-0.662365	0.116497	-5.68569	1.30282e-08	4.96647e-08	VC_1876	-	conserved hypothetical protein	S	POORLY CHARACTERIZED	Function unknown
VC_1947	158.763	-0.662706	0.172033	-3.8522	0.000117063	0.000285898	VC_1947	-	putative LysR family transcriptional regulator	K	INFORMATION STORAGE AND PROCESSING	Transcription
VC_2334	1965.73	-0.663585	0.102693	-6.46186	1.03424e-10	4.60485e-10	VC_2334	-	putative Mg2+ and Co2+ transporter	P	METABOLISM	Inorganic ion transport and metabolism
VC_1285	1356.18	-0.664098	0.0927738	-7.15825	8.17128e-13	4.34927e-12	VC_1285	-	putative Cellobiose phosphotransferase system YdjC-like protein	S	POORLY CHARACTERIZED	Function unknown
VC_A0527	4385.11	-0.66542	0.115388	-5.76679	8.07943e-09	3.11114e-08	VC_A0527	-	Putative GTPase (G3E family)	R	POORLY CHARACTERIZED	General function prediction only
VC_0953	456.259	-0.667883	0.117966	-5.66167	1.4991e-08	5.66579e-08	VC_0953	holA	DNA polymerase III, delta subunit	L	INFORMATION STORAGE AND PROCESSING	Replication, recombination and repair
VC_2082	13439.1	-0.668461	0.097533	-6.85369	7.19699e-12	3.52298e-11	VC_2082	znuC	Zinc import ATP-binding protein ZnuC	P	METABOLISM	Inorganic ion transport and metabolism
VC_1198	109.691	-0.669582	0.204099	-3.28066	0.00103563	0.00220078	VC_1198	-	putative D-lactate dehydrogenase	C	METABOLISM	Energy production and conversion
VC_2018	384.61	-0.669721	0.185909	-3.60241	0.000315275	0.000723749	VC_2018	pabC	Aminodeoxychorismate lyase	E, H	METABOLISM, METABOLISM	Amino acid transport and metabolism, Coenzyme transport and metabolism
VC_A0077	662.939	-0.669843	0.113196	-5.91752	3.26823e-09	1.30336e-08	VC_A0077	-	putative Sulfate permease	P	METABOLISM	Inorganic ion transport and metabolism
VC_1233	574.825	-0.670207	0.164859	-4.06533	4.79645e-05	0.000123037	VC_1233	-	Putative effector of murein hydrolase LrgA	R	POORLY CHARACTERIZED	General function prediction only
VC_2678	3295.56	-0.671195	0.113357	-5.92107	3.19846e-09	1.2781e-08	VC_2678	priA	Primosome factor n' (replication factor Y)	L	INFORMATION STORAGE AND PROCESSING	Replication, recombination and repair
VC_A0279	1305.85	-0.671756	0.110568	-6.0755	1.23603e-09	5.09798e-09	VC_A0279	-	putative transcriptional repressor PuuR	K	INFORMATION STORAGE AND PROCESSING	Transcription
VC_2015	530.225	-0.671853	0.137897	-4.87214	1.10394e-06	3.45339e-06	VC_2015	-	putative DNA polymerase III delta prime subunit	L	INFORMATION STORAGE AND PROCESSING	Replication, recombination and repair
VC_1210	3271.74	-0.672997	0.105169	-6.39917	1.56222e-10	6.84829e-10	VC_1210	-	-	-	-	-
VC_A0283	672.479	-0.673992	0.116104	-5.80507	6.43381e-09	2.50547e-08	VC_A0283	-	conserved hypothetical protein	M	CELLULAR PROCESSES AND SIGNALING	Cell wall/membrane/envelope biogenesis
VC_0696	1798.7	-0.674702	0.0922201	-7.31622	2.55059e-13	1.40265e-12	VC_0696	tyrA	T-protein [Includes: Chorismate mutase ; Prephenate dehydrogenase]	E	METABOLISM	Amino acid transport and metabolism
VC_1977	637.718	-0.675412	0.126206	-5.35168	8.71405e-08	3.07155e-07	VC_1977	aat	Aspartate aminotransferase	E	METABOLISM	Amino acid transport and metabolism
VC_1539	679.249	-0.676554	0.130227	-5.1952	2.04501e-07	6.90821e-07	VC_1539	-	putative Fructosamine-3-kinase	G	METABOLISM	Carbohydrate transport and metabolism
VC_A0675	132.961	-0.677684	0.211421	-3.20538	0.00134882	0.00281518	VC_A0675	-	putative Nitrate/nitrite sensor protein NarQ	T	CELLULAR PROCESSES AND SIGNALING	Signal transduction mechanisms
VC_A0976	418.084	-0.679435	0.13032	-5.2136	1.85213e-07	6.29946e-07	VC_A0976	-	-	-	-	-
VC_A0309	1640.47	-0.679716	0.117488	-5.78542	7.23297e-09	2.80569e-08	VC_A0309	-	putative endonuclease	V	CELLULAR PROCESSES AND SIGNALING	Defense mechanisms
VC_0778	353.264	-0.680621	0.133011	-5.11703	3.10378e-07	1.02582e-06	VC_0778	viuG	Ferric vibriobactin ABC transporter, permease protein	P	METABOLISM	Inorganic ion transport and metabolism
VC_1535	172.261	-0.680746	0.180599	-3.76938	0.000163651	0.000391267	VC_1535	-	conserved protein of unknown function	N, T	CELLULAR PROCESSES AND SIGNALING, CELLULAR PROCESSES AND SIGNALING	Cell motility, Signal transduction mechanisms
VC_A0144	3252.96	-0.681934	0.163814	-4.16286	3.14288e-05	8.2428e-05	VC_A0144	-	putative TRAP-type uncharacterized transport system, periplasmic component	R	POORLY CHARACTERIZED	General function prediction only
VC_A0277	4542.62	-0.682226	0.0880172	-7.75105	9.1136e-15	5.63541e-14	VC_A0277	gcvH	Glycine cleavage system H protein	E	METABOLISM	Amino acid transport and metabolism
VC_2016	110.744	-0.682739	0.217468	-3.13949	0.00169243	0.00346862	VC_2016	tmk	thymidylate kinase	F	METABOLISM	Nucleotide transport and metabolism
VC_A0568	97.2637	-0.686602	0.215964	-3.17924	0.00147661	0.00305621	VC_A0568	-	-	-	-	-
VC_A0704	1832.09	-0.688553	0.164665	-4.18154	2.89545e-05	7.6291e-05	VC_A0704	-	putative Phosphoglycerate transport system transcriptional regulatory protein PgtA	T	CELLULAR PROCESSES AND SIGNALING	Signal transduction mechanisms
VC_0741	864.164	-0.691259	0.107917	-6.40548	1.499e-10	6.57837e-10	VC_0741	tgt	Queuine tRNA-ribosyltransferase	J	INFORMATION STORAGE AND PROCESSING	Translation, ribosomal structure and biogenesis
VC_A1054	2020.12	-0.691482	0.118381	-5.84114	5.18434e-09	2.03484e-08	VC_A1054	-	Putative NADH-flavin reductase	R	POORLY CHARACTERIZED	General function prediction only
VC_2731	1581.17	-0.691741	0.0982327	-7.04186	1.89685e-12	9.80735e-12	VC_2731	epsF	General secretion pathway protein F	N, U	CELLULAR PROCESSES AND SIGNALING, CELLULAR PROCESSES AND SIGNALING	Cell motility, Intracellular trafficking, secretion, and vesicular transport
VC_1572	4791.23	-0.692175	0.0904852	-7.64959	2.01615e-14	1.20364e-13	VC_1572	-	-	-	-	-
VC_1495	367.819	-0.693489	0.140373	-4.94034	7.79877e-07	2.46878e-06	VC_1495	-	-	-	-	-
VC_0306	1213.01	-0.69391	0.160196	-4.33163	1.48012e-05	4.05021e-05	VC_0306	trxA	Thioredoxin-1	C, O	METABOLISM, CELLULAR PROCESSES AND SIGNALING	Energy production and conversion, Posttranslational modification, protein turnover, chaperones
VC_A0587	2614.76	-0.694597	0.122714	-5.66029	1.51119e-08	5.70607e-08	VC_A0587	-	putative DNA-binding protein	R	POORLY CHARACTERIZED	General function prediction only
VC_0573	1649.53	-0.694785	0.113951	-6.09725	1.07909e-09	4.47855e-09	VC_0573	petA2	Ubiquinol-cytochrome c reductase iron-sulfur subunit	C	METABOLISM	Energy production and conversion
VC_1369	2075.05	-0.694985	0.0962259	-7.22243	5.10667e-13	2.75124e-12	VC_1369	-	putative ABC-type nitrate/sulfonate/bicarbonate transport systems, periplasmic component	P	METABOLISM	Inorganic ion transport and metabolism
VC_2627	496.65	-0.695285	0.125742	-5.52946	3.21215e-08	1.17818e-07	VC_2627	-	putative DamX-related protein	S	POORLY CHARACTERIZED	Function unknown
VC_0855	1225.01	-0.695421	0.100462	-6.92224	4.44569e-12	2.21505e-11	VC_0855	dnaK	Chaperone protein dnaK	O	CELLULAR PROCESSES AND SIGNALING	Posttranslational modification, protein turnover, chaperones
VC_1178	745.071	-0.695551	0.119762	-5.8078	6.32989e-09	2.46742e-08	VC_1178	-	Putative translation factor (SUA5)	J	INFORMATION STORAGE AND PROCESSING	Translation, ribosomal structure and biogenesis
VC_A0483	5009.28	-0.697183	0.132425	-5.26474	1.40391e-07	4.82867e-07	VC_A0483	-	-	-	-	-
VC_2148	74.4506	-0.697559	0.233882	-2.98252	0.00285885	0.00566074	VC_2148	-	-	-	-	-
VC_0025	1289.91	-0.702151	0.104497	-6.71932	1.82577e-11	8.69374e-11	VC_0025	-	-	-	-	-
VC_0794	330.545	-0.702576	0.154256	-4.55462	5.24807e-06	1.51096e-05	VC_0794	oadG-2	Oxaloacetate decarboxylase gamma chain	C	METABOLISM	Energy production and conversion
VC_A1068	5737	-0.703884	0.109402	-6.43391	1.24364e-10	5.50022e-10	VC_A1068	lrp	Leucine-responsive regulatory protein	K	INFORMATION STORAGE AND PROCESSING	Transcription
VC_2199	2195.33	-0.705415	0.13282	-5.31105	1.08994e-07	3.80123e-07	VC_2199	-	putative Flagellar basal-body rod protein FlgC	N	CELLULAR PROCESSES AND SIGNALING	Cell motility
VC_1052	2280.35	-0.708302	0.104589	-6.77225	1.26797e-11	6.12571e-11	VC_1052	-	conserved hypothetical protein	S	POORLY CHARACTERIZED	Function unknown
VC_0259	792.471	-0.709349	0.106747	-6.64512	3.0296e-11	1.41714e-10	VC_0259	rfbV	Lipopolysaccharide biosynthesis protein RfbV	M	CELLULAR PROCESSES AND SIGNALING	Cell wall/membrane/envelope biogenesis
VC_A0360	464.153	-0.710581	0.14024	-5.06689	4.04365e-07	1.31352e-06	VC_A0360	-	-	-	-	-
VC_0473	17113.5	-0.711991	0.0942928	-7.55085	4.32414e-14	2.51357e-13	VC_0473	tkt1	Transketolase 1	G	METABOLISM	Carbohydrate transport and metabolism
VC_1945	282.319	-0.712377	0.2101	-3.39066	0.00069724	0.00152153	VC_1945	-	putative 2-polyprenyl-6-methoxyphenol hydroxylase and related FAD-dependent oxidoreductase	C, H	METABOLISM, METABOLISM	Energy production and conversion, Coenzyme transport and metabolism
VC_0293	365.476	-0.71281	0.135266	-5.2697	1.36647e-07	4.70805e-07	VC_0293	prmA	Ribosomal protein L11 methyltransferase	J	INFORMATION STORAGE AND PROCESSING	Translation, ribosomal structure and biogenesis
VC_2268	6566.59	-0.713885	0.137798	-5.18066	2.21107e-07	7.41249e-07	VC_2268	ribE	6,7-dimethyl-8-ribityllumazine synthase	H	METABOLISM	Coenzyme transport and metabolism
VC_2524	91.2891	-0.71572	0.22113	-3.23665	0.00120943	0.0025389	VC_2524	kdsC	3-deoxy-D-manno-octulosonate 8-phosphate phosphatase	R	POORLY CHARACTERIZED	General function prediction only
VC_0274	305.859	-0.717123	0.139293	-5.14831	2.62846e-07	8.73809e-07	VC_0274	-	-	-	-	-
VC_A0966	416.52	-0.717385	0.133563	-5.37114	7.82415e-08	2.77262e-07	VC_A0966	-	-	-	-	-
VC_1291	560.118	-0.71832	0.131576	-5.45934	4.77904e-08	1.72898e-07	VC_1291	-	putative signal-transduction protein containing cAMP-binding and CBS domains	T	CELLULAR PROCESSES AND SIGNALING	Signal transduction mechanisms
VC_1826	867.559	-0.718858	0.103024	-6.97759	3.00293e-12	1.52098e-11	VC_1826	-	putative PTS system, fructose-specific IIABC component	G, T	METABOLISM, CELLULAR PROCESSES AND SIGNALING	Carbohydrate transport and metabolism, Signal transduction mechanisms
VC_A0223	757.849	-0.720349	0.116108	-6.20411	5.50084e-10	2.32922e-09	VC_A0223	prtV	Protease	R, S	POORLY CHARACTERIZED, POORLY CHARACTERIZED	General function prediction only, Function unknown
VC_2525	524.046	-0.720671	0.114191	-6.31109	2.77077e-10	1.19227e-09	VC_2525	-	conserved hypothetical protein	S	POORLY CHARACTERIZED	Function unknown
VC_A1025	195.04	-0.721752	0.165039	-4.37322	1.22426e-05	3.37784e-05	VC_A1025	nagB	glucosamine-6-phosphate deaminase	G	METABOLISM	Carbohydrate transport and metabolism
VC_A0916	229.554	-0.7222	0.164087	-4.40133	1.0759e-05	2.98311e-05	VC_A0916	-	-	-	-	-
VC_A0719	810.132	-0.722369	0.104543	-6.90979	4.85385e-12	2.41236e-11	VC_A0719	-	putative Signal transduction histidine kinase	T	CELLULAR PROCESSES AND SIGNALING	Signal transduction mechanisms
VC_0124	313.576	-0.724968	0.168825	-4.29419	1.75329e-05	4.73258e-05	VC_0124	-	-	-	-	-
VC_2369	436.24	-0.726127	0.138584	-5.23963	1.60898e-07	5.50071e-07	VC_2369	arcB	Aerobic respiration control sensor protein arcB	T	CELLULAR PROCESSES AND SIGNALING	Signal transduction mechanisms
VC_0660	266.29	-0.728484	0.159084	-4.57923	4.66682e-06	1.3544e-05	VC_0660	srmB	ATP-dependent RNA helicase srmB	J, K, L	INFORMATION STORAGE AND PROCESSING, INFORMATION STORAGE AND PROCESSING, INFORMATION STORAGE AND PROCESSING	Translation, ribosomal structure and biogenesis, Transcription, Replication, recombination and repair
VC_1376	92.8307	-0.729699	0.217696	-3.35191	0.000802565	0.0017333	VC_1376	-	putative GGDEF family protein	T	CELLULAR PROCESSES AND SIGNALING	Signal transduction mechanisms
VC_0801	361.893	-0.729881	0.134167	-5.44009	5.32551e-08	1.92144e-07	VC_0801	citG	2-(5''-triphosphoribosyl)-3'-dephosphocoenzyme-A synthase	H	METABOLISM	Coenzyme transport and metabolism
VC_1896	5523.99	-0.733402	0.0957689	-7.65804	1.88787e-14	1.13215e-13	VC_1896	-	putative lipoprotein	R	POORLY CHARACTERIZED	General function prediction only
VC_1936	273.851	-0.734359	0.144125	-5.09528	3.4822e-07	1.14046e-06	VC_1936	-	putative Phosphatidate cytidylyltransferase	R	POORLY CHARACTERIZED	General function prediction only
VC_1839	351.801	-0.735513	0.160603	-4.57968	4.65681e-06	1.35248e-05	VC_1839	tolQ	Protein tolQ	U	CELLULAR PROCESSES AND SIGNALING	Intracellular trafficking, secretion, and vesicular transport
VC_A0400	370.964	-0.738195	0.135126	-5.463	4.68162e-08	1.69682e-07	VC_A0400	-	putative Acetyltransferase	K, R	INFORMATION STORAGE AND PROCESSING, POORLY CHARACTERIZED	Transcription, General function prediction only
VC_2377	1516.83	-0.746926	0.12436	-6.00616	1.89968e-09	7.67595e-09	VC_2377	gltD	Glutamate synthase [NADPH] small chain	E, R	METABOLISM, POORLY CHARACTERIZED	Amino acid transport and metabolism, General function prediction only
VC_2139	782.825	-0.747005	0.124668	-5.99194	2.07359e-09	8.37013e-09	VC_2139	-	putative flagellar FliT protein	D	CELLULAR PROCESSES AND SIGNALING	Cell cycle control, cell division, chromosome partitioning
VC_1195	14719.4	-0.747399	0.162285	-4.60546	4.11559e-06	1.20232e-05	VC_1195	-	putative OmpA-like protein fused with Rickettsia 17 kDa surface antigen	M	CELLULAR PROCESSES AND SIGNALING	Cell wall/membrane/envelope biogenesis
VC_2736	3694.13	-0.748748	0.0960598	-7.7946	6.46138e-15	4.06495e-14	VC_2736	hslO	33 kDa chaperonin	O	CELLULAR PROCESSES AND SIGNALING	Posttranslational modification, protein turnover, chaperones
VC_1157	154.947	-0.749542	0.186233	-4.02476	5.70331e-05	0.000145175	VC_1157	-	fragment of putative TWO COMPONENT HISTIDINE KINASE (part 1)	T	CELLULAR PROCESSES AND SIGNALING	Signal transduction mechanisms
VC_1036	1209.33	-0.750329	0.122319	-6.13422	8.55776e-10	3.57788e-09	VC_1036	metG	methionyl-tRNA synthetase	J, R	INFORMATION STORAGE AND PROCESSING, POORLY CHARACTERIZED	Translation, ribosomal structure and biogenesis, General function prediction only
VC_0432	1194.35	-0.752079	0.0978637	-7.68497	1.53038e-14	9.27559e-14	VC_0432	mdh	malate dehydrogenase	C	METABOLISM	Energy production and conversion
VC_0179	1762.29	-0.752822	0.119921	-6.27766	3.43708e-10	1.47103e-09	VC_0179	-	-	-	-	-
VC_0146	3197.23	-0.75296	0.099118	-7.5966	3.0401e-14	1.79605e-13	VC_0146	rsmD	Ribosomal RNA small subunit methyltransferase D	L	INFORMATION STORAGE AND PROCESSING	Replication, recombination and repair
VC_A0013	2130.51	-0.754512	0.105327	-7.16355	7.8615e-13	4.19561e-12	VC_A0013	malP	maltodextrin phosphorylase	G	METABOLISM	Carbohydrate transport and metabolism
VC_1555	367.493	-0.754868	0.138696	-5.44261	5.25051e-08	1.8961e-07	VC_1555	-	putative Clavaminate synthase-like	G	METABOLISM	Carbohydrate transport and metabolism
VC_A0101	2986.17	-0.755489	0.0974973	-7.74882	9.27532e-15	5.7265e-14	VC_A0101	-	putative Rtn protein	T	CELLULAR PROCESSES AND SIGNALING	Signal transduction mechanisms
VC_1309	484.286	-0.755787	0.129205	-5.8495	4.93044e-09	1.94478e-08	VC_1309	rimJ	Ribosomal-protein-alanine acetyltransferase	J	INFORMATION STORAGE AND PROCESSING	Translation, ribosomal structure and biogenesis
VC_2023	352.067	-0.757107	0.13683	-5.5332	3.14438e-08	1.15546e-07	VC_2023	fabH	3-oxoacyl-[acyl-carrier-protein] synthase 3	I	METABOLISM	Lipid transport and metabolism
VC_1258	464.351	-0.757555	0.163446	-4.63489	3.57123e-06	1.04946e-05	VC_1258	gyrA	DNA gyrase (type II topoisomerase), subunit A	L	INFORMATION STORAGE AND PROCESSING	Replication, recombination and repair
VC_0682	3843.93	-0.757633	0.0925648	-8.18489	2.72543e-16	1.94547e-15	VC_0682	ileS	isoleucyl-tRNA synthetase	J	INFORMATION STORAGE AND PROCESSING	Translation, ribosomal structure and biogenesis
VC_0763	904.685	-0.758234	0.106096	-7.14669	8.88984e-13	4.7128e-12	VC_0763	engA	GTP-binding protein engA	R	POORLY CHARACTERIZED	General function prediction only
VC_0276	1602.58	-0.758671	0.121999	-6.21865	5.01443e-10	2.13691e-09	VC_0276	purH	Bifunctional purine biosynthesis protein purH [Includes: Phosphoribosylaminoimidazolecarboxamide formyltransferase ; IMP cyclohydrolase]	F	METABOLISM	Nucleotide transport and metabolism
VC_1042	6446.45	-0.759911	0.102518	-7.41245	1.23987e-13	6.99251e-13	VC_1042	-	putative Long-chain fatty acid transport protein	I	METABOLISM	Lipid transport and metabolism
VC_A0079	132.72	-0.761847	0.202435	-3.76341	0.000167611	0.000399293	VC_A0079	-	putative Cell wall endopeptidase, family M23/M37	M	CELLULAR PROCESSES AND SIGNALING	Cell wall/membrane/envelope biogenesis
VC_A0647	1321.24	-0.763237	0.135864	-5.61767	1.93547e-08	7.24615e-08	VC_A0647	-	conserved hypothetical protein	S	POORLY CHARACTERIZED	Function unknown
VC_A0056	10577.7	-0.764233	0.105462	-7.24651	4.27643e-13	2.3165e-12	VC_A0056	-	putative Transcriptional regulator, MerR family	K	INFORMATION STORAGE AND PROCESSING	Transcription
VC_1322	564.328	-0.764714	0.143424	-5.33184	9.722e-08	3.4087e-07	VC_1322	-	conserved hypothetical protein	S	POORLY CHARACTERIZED	Function unknown
VC_2738	705.787	-0.76548	0.106874	-7.16247	7.92366e-13	4.22312e-12	VC_2738	pck	Phosphoenolpyruvate carboxykinase [ATP]	C	METABOLISM	Energy production and conversion
VC_1226	205.063	-0.767976	0.156508	-4.90696	9.25002e-07	2.90966e-06	VC_1226	tpm	Thiopurine S-methyltransferase	Q, R	METABOLISM, POORLY CHARACTERIZED	Secondary metabolites biosynthesis, transport and catabolism, General function prediction only
VC_A0682	676.326	-0.768554	0.116407	-6.60232	4.04769e-11	1.86053e-10	VC_A0682	uhpA	Transcriptional regulatory protein uhpA	K, T	INFORMATION STORAGE AND PROCESSING, CELLULAR PROCESSES AND SIGNALING	Transcription, Signal transduction mechanisms
VC_A0693	94.3338	-0.768794	0.21236	-3.62024	0.000294329	0.000679589	VC_A0693	-	putative Protein-export membrane protein SecD	U	CELLULAR PROCESSES AND SIGNALING	Intracellular trafficking, secretion, and vesicular transport
VC_A0716	342.464	-0.768919	0.159026	-4.83517	1.33032e-06	4.10664e-06	VC_A0716	-	putative Cytochrome B561	C	METABOLISM	Energy production and conversion
VC_1679	353.075	-0.771304	0.142497	-5.41278	6.20534e-08	2.22274e-07	VC_1679	pspF	Psp operon transcriptional activator	T	CELLULAR PROCESSES AND SIGNALING	Signal transduction mechanisms
VC_0620	224.314	-0.771673	0.156894	-4.91843	8.72403e-07	2.75292e-06	VC_0620	-	putative ABC-type dipeptide transport system, periplasmic component	E	METABOLISM	Amino acid transport and metabolism
VC_2641	134.447	-0.771874	0.187962	-4.10654	4.01633e-05	0.00010356	VC_2641	argH	Argininosuccinate lyase	E	METABOLISM	Amino acid transport and metabolism
VC_1039	978.336	-0.774309	0.129798	-5.96548	2.43917e-09	9.81594e-09	VC_1039	-	putative AsmA protein	M	CELLULAR PROCESSES AND SIGNALING	Cell wall/membrane/envelope biogenesis
VC_2682	309.633	-0.774637	0.162392	-4.77015	1.84088e-06	5.57452e-06	VC_2682	metJ	Met repressor	E, K	METABOLISM, INFORMATION STORAGE AND PROCESSING	Amino acid transport and metabolism, Transcription
VC_A0606	66.232	-0.774972	0.252134	-3.07365	0.0021146	0.00427652	VC_A0606	phnX	Phosphonoacetaldehyde hydrolase	R	POORLY CHARACTERIZED	General function prediction only
VC_0822	121.619	-0.775319	0.220258	-3.52005	0.000431463	0.000974714	VC_0822	-	-	-	-	-
VC_1010	153.67	-0.776016	0.17479	-4.43971	9.00796e-06	2.51868e-05	VC_1010	gloA	lactoylglutathione lyase	E	METABOLISM	Amino acid transport and metabolism
VC_2566	96.8727	-0.776261	0.212779	-3.6482	0.00026408	0.000613307	VC_2566	-	putative Permease of the drug/metabolite transporter (DMT) superfamily	E, G, R	METABOLISM, METABOLISM, POORLY CHARACTERIZED	Amino acid transport and metabolism, Carbohydrate transport and metabolism, General function prediction only
VC_A0918	187.581	-0.777183	0.165421	-4.69822	2.62441e-06	7.82796e-06	VC_A0918	-	-	-	-	-
VC_0150	174.478	-0.779319	0.170777	-4.56336	5.03418e-06	1.45253e-05	VC_0150	rpoH	RNA polymerase sigma-32 factor	K	INFORMATION STORAGE AND PROCESSING	Transcription
VC_A0977	18875.6	-0.780058	0.163904	-4.75924	1.94319e-06	5.86199e-06	VC_A0977	-	putative ABC-type dipeptide/oligopeptide/nickel transport system, ATPase component	R	POORLY CHARACTERIZED	General function prediction only
VC_1136	840.097	-0.780263	0.174916	-4.46079	8.16575e-06	2.29125e-05	VC_1136	hisH	Imidazole glycerol phosphate synthase subunit hisH	E	METABOLISM	Amino acid transport and metabolism
VC_A0593	2260.6	-0.780546	0.0987872	-7.90129	2.76034e-15	1.78167e-14	VC_A0593	-	putative exopolyphosphatase-like protein	R	POORLY CHARACTERIZED	General function prediction only
VC_0094	240.757	-0.781171	0.169082	-4.62007	3.8361e-06	1.12398e-05	VC_0094	ubiA	4-hydroxybenzoate octaprenyltransferase	H	METABOLISM	Coenzyme transport and metabolism
VC_A0014	1358.53	-0.782037	0.0989266	-7.90523	2.67448e-15	1.73188e-14	VC_A0014	malQ	4-alpha-glucanotransferase	G	METABOLISM	Carbohydrate transport and metabolism
VC_0865	170.529	-0.784618	0.190553	-4.11759	3.82863e-05	9.91702e-05	VC_0865	-	-	-	-	-
VC_0338	275.594	-0.785288	0.144382	-5.43898	5.35878e-08	1.93169e-07	VC_0338	-	putative sodium/dicarboxylate family cotransporter	P	METABOLISM	Inorganic ion transport and metabolism
VC_1996	2485.73	-0.786882	0.13507	-5.82574	5.68594e-09	2.22294e-08	VC_1996	-	conserved hypothetical protein	S	POORLY CHARACTERIZED	Function unknown
VC_2557	1743.62	-0.787214	0.0971586	-8.10237	5.39003e-16	3.70134e-15	VC_2557	-	-	-	-	-
VC_2665	1290.33	-0.789403	0.112172	-7.03741	1.95849e-12	1.00922e-11	VC_2665	groS	10 kDa chaperonin	O	CELLULAR PROCESSES AND SIGNALING	Posttranslational modification, protein turnover, chaperones
VC_2269	310.408	-0.790008	0.141298	-5.59108	2.25661e-08	8.40889e-08	VC_2269	ribB	3,4-dihydroxy-2-butanone 4-phosphate synthase	H	METABOLISM	Coenzyme transport and metabolism
VC_2448	302.115	-0.790222	0.15268	-5.17567	2.27089e-07	7.6002e-07	VC_2448	pyrG	CTP synthetase	F	METABOLISM	Nucleotide transport and metabolism
VC_0524	221.339	-0.791015	0.178535	-4.43059	9.39734e-06	2.62202e-05	VC_0524	folB	Dihydroneopterin aldolase	H	METABOLISM	Coenzyme transport and metabolism
VC_2115	246.904	-0.792668	0.155705	-5.09083	3.56506e-07	1.16664e-06	VC_2115	-	conserved hypothetical protein	S	POORLY CHARACTERIZED	Function unknown
VC_0061	217.502	-0.79275	0.154308	-5.13746	2.78472e-07	9.22672e-07	VC_0061	thiC	Thiamine biosynthesis protein thiC	H	METABOLISM	Coenzyme transport and metabolism
VC_1505	101.727	-0.792903	0.210589	-3.76516	0.000166441	0.000397459	VC_1505	-	-	-	-	-
VC_A0327	2577.8	-0.795192	0.0979086	-8.12178	4.59403e-16	3.17116e-15	VC_A0327	-	-	-	-	-
VC_0046	64.8326	-0.796704	0.251274	-3.17066	0.00152094	0.0031398	VC_0046	def1	Peptide deformylase 1	J	INFORMATION STORAGE AND PROCESSING	Translation, ribosomal structure and biogenesis
VC_0303	263.55	-0.797162	0.155479	-5.12714	2.9418e-07	9.73096e-07	VC_0303	-	putative sensor histidine kinase	E, R, T	METABOLISM, POORLY CHARACTERIZED, CELLULAR PROCESSES AND SIGNALING	Amino acid transport and metabolism, General function prediction only, Signal transduction mechanisms
VC_A0666	601.908	-0.797854	0.125277	-6.3687	1.90632e-10	8.27459e-10	VC_A0666	sdaA	L-serine dehydratase	E	METABOLISM	Amino acid transport and metabolism
VC_2086	1451.89	-0.799842	0.102134	-7.83127	4.82982e-15	3.05786e-14	VC_2086	sucB	Dihydrolipoyllysine-residue succinyltransferase component of 2-oxoglutarate dehydrogenase complex	C	METABOLISM	Energy production and conversion
VC_A0564	11135	-0.802948	0.148008	-5.42502	5.79468e-08	2.08315e-07	VC_A0564	pntB	NAD(P) transhydrogenase subunit beta	C	METABOLISM	Energy production and conversion
VC_2657	21078.3	-0.803581	0.125659	-6.39495	1.60596e-10	7.02454e-10	VC_2657	frdB	Fumarate reductase iron-sulfur subunit	C	METABOLISM	Energy production and conversion
VC_1316	112.864	-0.805595	0.223248	-3.60853	0.000307939	0.000707727	VC_1316	-	Putative chemotaxis protein CheY	T	CELLULAR PROCESSES AND SIGNALING	Signal transduction mechanisms
VC_1382	4983.05	-0.805947	0.0899527	-8.95968	3.25609e-19	2.81439e-18	VC_1382	hrpA	ATP-dependent RNA helicase hrpA	L	INFORMATION STORAGE AND PROCESSING	Replication, recombination and repair
VC_1024	376.711	-0.807356	0.14696	-5.49372	3.93558e-08	1.43558e-07	VC_1024	moaA	Molybdenum cofactor biosynthesis protein A	H	METABOLISM	Coenzyme transport and metabolism
VC_A0038	1313.39	-0.807979	0.108758	-7.42912	1.09321e-13	6.18292e-13	VC_A0038	-	putative Cytochrome oxidase biogenesis protein Sco1/SenC/PrrC, putative copper metallochaperone	R	POORLY CHARACTERIZED	General function prediction only
VC_0725	3457.28	-0.807996	0.10072	-8.0222	1.03869e-15	6.97606e-15	VC_0725	pstA	Phosphate ABC transporter, permease protein	P	METABOLISM	Inorganic ion transport and metabolism
VC_A0796	565.755	-0.808281	0.147868	-5.46625	4.59661e-08	1.66753e-07	VC_A0796	-	-	-	-	-
VC_A0878	94.3417	-0.80881	0.239953	-3.37071	0.00074975	0.0016263	VC_A0878	-	putative Integrase-related protein	L	INFORMATION STORAGE AND PROCESSING	Replication, recombination and repair
VC_0632	1818.3	-0.808824	0.0949468	-8.5187	1.61354e-17	1.25057e-16	VC_0632	-	putative D-alanyl-D-alanine carboxypeptidase	M	CELLULAR PROCESSES AND SIGNALING	Cell wall/membrane/envelope biogenesis
VC_0586	1841.17	-0.808868	0.105532	-7.66465	1.79323e-14	1.07702e-13	VC_0586	can	Carbonic anhydrase 2	P	METABOLISM	Inorganic ion transport and metabolism
VC_0452	774.407	-0.809038	0.149017	-5.42918	5.6615e-08	2.03896e-07	VC_0452	mutY	A/G-specific adenine glycosylase	L	INFORMATION STORAGE AND PROCESSING	Replication, recombination and repair
VC_2270	338.301	-0.809119	0.13768	-5.87683	4.18208e-09	1.65617e-08	VC_2270	ribE	riboflavin synthase subunit alpha	H	METABOLISM	Coenzyme transport and metabolism
VC_A0173	561.879	-0.809647	0.150815	-5.36848	7.94036e-08	2.8088e-07	VC_A0173	-	-	-	-	-
VC_1783	75.1769	-0.811427	0.248329	-3.26755	0.00108484	0.00229922	VC_1783	-	putative N-acetylglucosamine-6-phosphate deacetylase	G	METABOLISM	Carbohydrate transport and metabolism
VC_A1060	382.124	-0.811507	0.127878	-6.34593	2.21086e-10	9.55475e-10	VC_A1060	ribB	3,4-dihydroxy-2-butanone 4-phosphate synthase	H	METABOLISM	Coenzyme transport and metabolism
VC_1962	354.533	-0.812496	0.136563	-5.9496	2.68793e-09	1.07951e-08	VC_1962	-	putative lipoprotein NlpE involved in copper resistance	M, P	CELLULAR PROCESSES AND SIGNALING, METABOLISM	Cell wall/membrane/envelope biogenesis, Inorganic ion transport and metabolism
VC_2009	120.655	-0.81341	0.198648	-4.09472	4.2267e-05	0.000108773	VC_2009	-	putative esterase of the alpha-beta hydrolase superfamily	R	POORLY CHARACTERIZED	General function prediction only
VC_1503	1609.74	-0.813644	0.10094	-8.06068	7.58716e-16	5.14787e-15	VC_1503	-	conserved hypothetical protein	S	POORLY CHARACTERIZED	Function unknown
VC_0567	795.414	-0.814809	0.121919	-6.68318	2.3381e-11	1.10276e-10	VC_0567	-	Putative cytochrome d ubiquinol oxidase subunit III	S	POORLY CHARACTERIZED	Function unknown
VC_1695	570.358	-0.816227	0.117307	-6.95802	3.45078e-12	1.73455e-11	VC_1695	-	putative Formate efflux transporter	P	METABOLISM	Inorganic ion transport and metabolism
VC_2501	354.579	-0.817817	0.158906	-5.14655	2.65321e-07	8.80564e-07	VC_2501	pepA	Cytosol aminopeptidase	E	METABOLISM	Amino acid transport and metabolism
VC_2237	10227.1	-0.818437	0.0806135	-10.1526	3.22625e-24	3.95913e-23	VC_2237	-	Putative Membrane-bound lytic murein transglycosylase D precursor	M	CELLULAR PROCESSES AND SIGNALING	Cell wall/membrane/envelope biogenesis
VC_2480	603.438	-0.819669	0.178654	-4.58803	4.47448e-06	1.30143e-05	VC_2480	rpiA	Ribose-5-phosphate isomerase A	G	METABOLISM	Carbohydrate transport and metabolism
VC_2309	854.051	-0.820246	0.125124	-6.55547	5.5468e-11	2.52335e-10	VC_2309	sufS	Cysteine desulfurase	E	METABOLISM	Amino acid transport and metabolism
VC_2203	243.23	-0.822251	0.166206	-4.94718	7.52946e-07	2.38924e-06	VC_2203	-	putative Flagellar basal-body P-ring formation protein flgA	N, O	CELLULAR PROCESSES AND SIGNALING, CELLULAR PROCESSES AND SIGNALING	Cell motility, Posttranslational modification, protein turnover, chaperones
VC_A0561	3328	-0.822489	0.132457	-6.20949	5.31572e-10	2.25323e-09	VC_A0561	-	-	-	-	-
VC_0263	114.853	-0.823275	0.199958	-4.11725	3.83424e-05	9.9251e-05	VC_0263	-	Galactosyl transferase	M	CELLULAR PROCESSES AND SIGNALING	Cell wall/membrane/envelope biogenesis
VC_0488	951.083	-0.823578	0.106635	-7.72334	1.13319e-14	6.92097e-14	VC_0488	-	putative TRAP dicarboxylate transporter- DctP subunit	Q	METABOLISM	Secondary metabolites biosynthesis, transport and catabolism
VC_0723	171.426	-0.825308	0.173114	-4.76744	1.86581e-06	5.64143e-06	VC_0723	ppk	polyphosphate kinase	P	METABOLISM	Inorganic ion transport and metabolism
VC_0970	2571.02	-0.825522	0.0887408	-9.30262	1.37031e-20	1.33866e-19	VC_0970	-	putative Cell division protein ZipA	D	CELLULAR PROCESSES AND SIGNALING	Cell cycle control, cell division, chromosome partitioning
VC_2255	266.578	-0.82688	0.173651	-4.76172	1.91947e-06	5.79925e-06	VC_2255	cdsA	Phosphatidate cytidylyltransferase	I	METABOLISM	Lipid transport and metabolism
VC_A0852	2597.68	-0.82871	0.0889075	-9.32104	1.15208e-20	1.13103e-19	VC_A0852	-	-	-	-	-
VC_A0448	80.8121	-0.829046	0.255878	-3.24	0.0011953	0.00251322	VC_A0448	-	-	-	-	-
VC_0215	1751.12	-0.831937	0.111079	-7.48962	6.90747e-14	3.97454e-13	VC_0215	coaBC	Coenzyme A biosynthesis bifunctional protein CoaBC [Includes: Phosphopantothenoylcysteine decarboxylase ; Phosphopantothenate--cysteine ligase]	H	METABOLISM	Coenzyme transport and metabolism
VC_2123	821.378	-0.832054	0.119138	-6.98397	2.86943e-12	1.4608e-11	VC_2123	fliP	flagellar biosynthesis protein FliP	N, U	CELLULAR PROCESSES AND SIGNALING, CELLULAR PROCESSES AND SIGNALING	Cell motility, Intracellular trafficking, secretion, and vesicular transport
VC_A0197	143.851	-0.832848	0.190768	-4.36576	1.26683e-05	3.48335e-05	VC_A0197	guaC	GMP reductase	F	METABOLISM	Nucleotide transport and metabolism
VC_1354	66.8139	-0.832861	0.260795	-3.19354	0.00140539	0.0029225	VC_1354	rlmI	Ribosomal RNA large subunit methyltransferase	R	POORLY CHARACTERIZED	General function prediction only
VC_0228	981.527	-0.832883	0.101122	-8.23641	1.77448e-16	1.27814e-15	VC_0228	-	-	-	-	-
VC_0323	681.255	-0.834852	0.124048	-6.7301	1.69545e-11	8.09258e-11	VC_0323	nusG	Transcription antitermination protein nusG	K	INFORMATION STORAGE AND PROCESSING	Transcription
VC_2613	1977.22	-0.835923	0.115839	-7.21626	5.34373e-13	2.87117e-12	VC_2613	cfxP	phosphoribulokinase	C	METABOLISM	Energy production and conversion
VC_0001	1122.48	-0.83845	0.0984089	-8.52006	1.59466e-17	1.24078e-16	VC_0001	-	-	-	-	-
VC_A0488	75.5679	-0.840263	0.273266	-3.07489	0.00210579	0.00426088	VC_A0488	relB	Plasmid stabilization system 488 protein (antitoxin of TA system 488-489)	D	CELLULAR PROCESSES AND SIGNALING	Cell cycle control, cell division, chromosome partitioning
VC_1448	1067.84	-0.841962	0.163101	-5.1622	2.44065e-07	8.14095e-07	VC_1448	lktB	Leukotoxin translocation ATP-binding protein lktB	V	CELLULAR PROCESSES AND SIGNALING	Defense mechanisms
VC_1608	994.555	-0.842616	0.107286	-7.85391	4.03276e-15	2.56959e-14	VC_1608	-	putative ABC-type multidrug transport system, permease component	V	CELLULAR PROCESSES AND SIGNALING	Defense mechanisms
VC_A0140	71.1672	-0.843404	0.242892	-3.47234	0.000515935	0.00115569	VC_A0140	-	putative Chitin binding domain protein	R, S	POORLY CHARACTERIZED, POORLY CHARACTERIZED	General function prediction only, Function unknown
VC_0086	208.346	-0.843583	0.191403	-4.40735	1.04642e-05	2.90746e-05	VC_0086	tatA	Sec-independent protein translocase tatA	U	CELLULAR PROCESSES AND SIGNALING	Intracellular trafficking, secretion, and vesicular transport
VC_1153	1325.96	-0.844138	0.0960166	-8.79158	1.47465e-18	1.22918e-17	VC_1153	tfoX	Regulator of competence-specific genes	K	INFORMATION STORAGE AND PROCESSING	Transcription
VC_0464	3735.57	-0.844859	0.131067	-6.44599	1.14846e-10	5.09062e-10	VC_0464	-	putative LuxR family transcriptional regulator	K	INFORMATION STORAGE AND PROCESSING	Transcription
VC_0708	282.397	-0.845547	0.187041	-4.52065	6.16513e-06	1.75843e-05	VC_0708	-	putative Outer membrane assembly lipoprotein YfiO	R	POORLY CHARACTERIZED	General function prediction only
VC_1522	666.823	-0.847915	0.124307	-6.82114	9.03225e-12	4.40101e-11	VC_1522	-	putative sigma-54 dependent response regulator	T	CELLULAR PROCESSES AND SIGNALING	Signal transduction mechanisms
VC_0381	1170.97	-0.848519	0.105567	-8.03771	9.15346e-16	6.15806e-15	VC_0381	-	-	-	-	-
VC_2498	835.836	-0.850057	0.103958	-8.17692	2.91182e-16	2.06371e-15	VC_2498	-	conserved hypothetical protein	S	POORLY CHARACTERIZED	Function unknown
VC_2424	83.2956	-0.85244	0.290408	-2.93532	0.00333209	0.00656836	VC_2424	tapB	Type IV pilus assembly protein tapB	N, U	CELLULAR PROCESSES AND SIGNALING, CELLULAR PROCESSES AND SIGNALING	Cell motility, Intracellular trafficking, secretion, and vesicular transport
VC_1129	432.154	-0.852762	0.138058	-6.17683	6.54026e-10	2.75467e-09	VC_1129	gsk	Inosine-guanosine kinase	G	METABOLISM	Carbohydrate transport and metabolism
VC_1100	574.802	-0.852933	0.132672	-6.4289	1.2853e-10	5.67815e-10	VC_1100	-	conserved hypothetical protein	S	POORLY CHARACTERIZED	Function unknown
VC_0214	838.776	-0.852983	0.120182	-7.09741	1.2712e-12	6.65037e-12	VC_0214	slmA	HTH-type protein slmA	K	INFORMATION STORAGE AND PROCESSING	Transcription
VC_1152	395.041	-0.853676	0.127052	-6.71912	1.82828e-11	8.69528e-11	VC_1152	-	putative Metal-dependent hydrolase HDOD	T	CELLULAR PROCESSES AND SIGNALING	Signal transduction mechanisms
VC_1966	437.141	-0.855403	0.124646	-6.86267	6.75865e-12	3.32579e-11	VC_1966	-	putative Permease of the major facilitator superfamily fused with 1-acyl-sn-glycerol-3-phosphate acyltransferase	E, G, I, P, R	METABOLISM, METABOLISM, METABOLISM, METABOLISM, POORLY CHARACTERIZED	Amino acid transport and metabolism, Carbohydrate transport and metabolism, Lipid transport and metabolism, Inorganic ion transport and metabolism, General function prediction only
VC_1411	1271.47	-0.85582	0.107833	-7.93651	2.07952e-15	1.36214e-14	VC_1411	vceB	putative Drug resistance transporter EmrB/QacA subfamily	E, G, P, R	METABOLISM, METABOLISM, METABOLISM, POORLY CHARACTERIZED	Amino acid transport and metabolism, Carbohydrate transport and metabolism, Inorganic ion transport and metabolism, General function prediction only
VC_A0006	1190.82	-0.855907	0.109391	-7.82431	5.10446e-15	3.22148e-14	VC_A0006	-	conserved hypothetical protein	S	POORLY CHARACTERIZED	Function unknown
VC_A0888	3957.88	-0.857044	0.103832	-8.25414	1.53002e-16	1.1101e-15	VC_A0888	-	putative LuxR family transcriptional regulatory, chaperone HchA-associated	K	INFORMATION STORAGE AND PROCESSING	Transcription
VC_1784	824.088	-0.857054	0.106218	-8.06878	7.10029e-16	4.83403e-15	VC_1784	nanH	Sialidase	G	METABOLISM	Carbohydrate transport and metabolism
VC_A0905	1303.43	-0.857267	0.111749	-7.67133	1.70219e-14	1.027e-13	VC_A0905	cdaR	transcriptional regulator	K, T	INFORMATION STORAGE AND PROCESSING, CELLULAR PROCESSES AND SIGNALING	Transcription, Signal transduction mechanisms
VC_2662	149.474	-0.859906	0.184169	-4.66913	3.02485e-06	8.96853e-06	VC_2662	-	-	-	-	-
VC_0746	1061.11	-0.860967	0.103866	-8.28919	1.14025e-16	8.39559e-16	VC_0746	trmJ	tRNA (cytidine/uridine-2'-O-)-methyltransferase trmJ	J	INFORMATION STORAGE AND PROCESSING	Translation, ribosomal structure and biogenesis
VC_1558	642.251	-0.862021	0.11412	-7.55365	4.23213e-14	2.46729e-13	VC_1558	bglA	Aryl-phospho-beta-D-glucosidase BglA	G	METABOLISM	Carbohydrate transport and metabolism
VC_1477	560.704	-0.862278	0.125752	-6.857	7.03232e-12	3.45618e-11	VC_1477	insN	Transposase insN for insertion sequence element IS911	L	INFORMATION STORAGE AND PROCESSING	Replication, recombination and repair
VC_1519	1974.02	-0.862776	0.106321	-8.11481	4.86553e-16	3.35274e-15	VC_1519	-	putative Formate dehydrogenase, subunit FdhD	C	METABOLISM	Energy production and conversion
VC_A0699	897.987	-0.864135	0.124408	-6.94597	3.75866e-12	1.87744e-11	VC_A0699	glgC	Glucose-1-phosphate adenylyltransferase	G	METABOLISM	Carbohydrate transport and metabolism
VC_2120	181.384	-0.86433	0.166506	-5.19099	2.0918e-07	7.03634e-07	VC_2120	flhB	Flagellar biosynthetic protein flhB	N, U	CELLULAR PROCESSES AND SIGNALING, CELLULAR PROCESSES AND SIGNALING	Cell motility, Intracellular trafficking, secretion, and vesicular transport
VC_2376	1306.68	-0.864581	0.101214	-8.54211	1.31791e-17	1.02947e-16	VC_2376	gltB	Glutamate synthase [NADPH] large chain	E	METABOLISM	Amino acid transport and metabolism
VC_1004	292.417	-0.869172	0.146499	-5.93295	2.97531e-09	1.19132e-08	VC_1004	purF	amidophosphoribosyltransferase	F	METABOLISM	Nucleotide transport and metabolism
VC_1714	391.325	-0.86972	0.156419	-5.5602	2.69472e-08	9.95742e-08	VC_1714	mukB	Chromosome partition protein mukB	D	CELLULAR PROCESSES AND SIGNALING	Cell cycle control, cell division, chromosome partitioning
VC_1635	340.804	-0.870172	0.133232	-6.53124	6.52265e-11	2.94121e-10	VC_1635	rsuA	Ribosomal small subunit pseudouridine synthase A	J	INFORMATION STORAGE AND PROCESSING	Translation, ribosomal structure and biogenesis
VC_2008	815.311	-0.872724	0.110722	-7.88215	3.21793e-15	2.06363e-14	VC_2008	pykA	pyruvate kinase II	G	METABOLISM	Carbohydrate transport and metabolism
VC_2470	210.876	-0.87273	0.18804	-4.6412	3.46393e-06	1.01944e-05	VC_2470	-	-	-	-	-
VC_t076	181.468	-0.872932	0.260013	-3.35726	0.000787192	0.00170287	VC_t076	-	-	-	-	-
VC_A0594	928.889	-0.874211	0.193272	-4.52322	6.09055e-06	1.73966e-05	VC_A0594	-	putative Hemolysin	R	POORLY CHARACTERIZED	General function prediction only
VC_1375	671.782	-0.87573	0.117297	-7.4659	8.27315e-14	4.73978e-13	VC_1375	-	-	-	-	-
VC_2550	205.579	-0.875953	0.182016	-4.8125	1.4905e-06	4.57271e-06	VC_2550	-	conserved hypothetical protein	R	POORLY CHARACTERIZED	General function prediction only
VC_1531	72.0611	-0.876504	0.253456	-3.45822	0.000543765	0.00121121	VC_1531	-	-	-	-	-
VC_A1115	5607.4	-0.87687	0.103053	-8.50891	1.7558e-17	1.35819e-16	VC_A1115	parA	Chromosome (plasmid) partitioning protein ParA	D	CELLULAR PROCESSES AND SIGNALING	Cell cycle control, cell division, chromosome partitioning
VC_2127	64.8611	-0.876933	0.28472	-3.07998	0.00207013	0.00419299	VC_2127	-	putative Flagellar biosynthesis protein fliL	N	CELLULAR PROCESSES AND SIGNALING	Cell motility
VC_0587	104.872	-0.877796	0.224206	-3.91513	9.03569e-05	0.000224397	VC_0587	-	putative sulfate transporter	P	METABOLISM	Inorganic ion transport and metabolism
VC_A0313	3158.46	-0.878175	0.110063	-7.97884	1.47713e-15	9.82121e-15	VC_A0313	-	Putative MutT/nudix family protein	L, R	INFORMATION STORAGE AND PROCESSING, POORLY CHARACTERIZED	Replication, recombination and repair, General function prediction only
VC_2321	1267.55	-0.880515	0.125659	-7.00718	2.43177e-12	1.23958e-11	VC_2321	-	-	-	-	-
VC_1529	6194.17	-0.880991	0.132936	-6.62716	3.42215e-11	1.58399e-10	VC_1529	-	conserved hypothetical protein	E, T	METABOLISM, CELLULAR PROCESSES AND SIGNALING	Amino acid transport and metabolism, Signal transduction mechanisms
VC_A0885	530.336	-0.881175	0.125342	-7.03018	2.06266e-12	1.06095e-11	VC_A0885	tdh	L-threonine 3-dehydrogenase	E, R	METABOLISM, POORLY CHARACTERIZED	Amino acid transport and metabolism, General function prediction only
VC_0503	364.822	-0.883382	0.136801	-6.45744	1.06492e-10	4.73087e-10	VC_0503	-	putative Peptidase M23B	M	CELLULAR PROCESSES AND SIGNALING	Cell wall/membrane/envelope biogenesis
VC_1502	3178.22	-0.883528	0.0953989	-9.2614	2.01763e-20	1.94711e-19	VC_1502	rsmF	Ribosomal RNA small subunit methyltransferase F	J, S	INFORMATION STORAGE AND PROCESSING, POORLY CHARACTERIZED	Translation, ribosomal structure and biogenesis, Function unknown
VC_A0925	67.7491	-0.886409	0.267005	-3.31982	0.000900765	0.00193382	VC_A0925	pyrC	dihydro-orotase	F	METABOLISM	Nucleotide transport and metabolism
VC_0510	1037.71	-0.886568	0.130032	-6.81807	9.22715e-12	4.48498e-11	VC_0510	-	Putative DNA repair protein RadC family protein	L	INFORMATION STORAGE AND PROCESSING	Replication, recombination and repair
VC_1901	721.556	-0.889467	0.105822	-8.40531	4.26742e-17	3.20742e-16	VC_1901	nhaB	Na(+)/H(+) antiporter nhaB	P	METABOLISM	Inorganic ion transport and metabolism
VC_1763	1800.89	-0.889836	0.114636	-7.76225	8.34345e-15	5.16722e-14	VC_1763	-	putative OmpA-C-like	N	CELLULAR PROCESSES AND SIGNALING	Cell motility
VC_A0946	2397.67	-0.892803	0.105565	-8.4574	2.73394e-17	2.07842e-16	VC_A0946	malK	Maltose/maltodextrin import ATP-binding protein malK	G	METABOLISM	Carbohydrate transport and metabolism
VC_1879	518.847	-0.893709	0.15059	-5.93471	2.94356e-09	1.1798e-08	VC_1879	-	putative DNA internalization-related competence protein ComEC/Rec2	R	POORLY CHARACTERIZED	General function prediction only
VC_1457	566.021	-0.89397	0.13343	-6.69992	2.0854e-11	9.87092e-11	VC_1457	-	-	-	-	-
VC_0596	3076.38	-0.89581	0.184071	-4.86666	1.135e-06	3.54498e-06	VC_0596	dksA	DnaK suppressor protein	T	CELLULAR PROCESSES AND SIGNALING	Signal transduction mechanisms
VC_0120	2019.86	-0.897574	0.12235	-7.33614	2.19842e-13	1.22766e-12	VC_0120	hemC	Porphobilinogen deaminase	H	METABOLISM	Coenzyme transport and metabolism
VC_A0662	119.567	-0.898147	0.209445	-4.28822	1.80109e-05	4.84515e-05	VC_A0662	-	putative beta-phosphoglucomutase family hydrolase	R	POORLY CHARACTERIZED	General function prediction only
VC_1174	945.801	-0.899106	0.101297	-8.87595	6.93419e-19	5.90371e-18	VC_1174	trpE	Anthranilate synthase component 1	E, H	METABOLISM, METABOLISM	Amino acid transport and metabolism, Coenzyme transport and metabolism
VC_2146	147.544	-0.901287	0.185786	-4.85121	1.22713e-06	3.81177e-06	VC_2146	-	-	-	-	-
VC_2241	14456.3	-0.901486	0.0989796	-9.10779	8.40781e-20	7.6323e-19	VC_2241	-	putative Cytochrome c	C	METABOLISM	Energy production and conversion
VC_A0005	353.565	-0.902432	0.194013	-4.6514	3.29685e-06	9.7387e-06	VC_A0005	-	-	-	-	-
VC_A0974	1666.6	-0.904825	0.116153	-7.78991	6.70566e-15	4.19209e-14	VC_A0974	-	putative Methyl-accepting chemotaxis protein	N, T	CELLULAR PROCESSES AND SIGNALING, CELLULAR PROCESSES AND SIGNALING	Cell motility, Signal transduction mechanisms
VC_A0078	3401.98	-0.904884	0.121306	-7.4595	8.68493e-14	4.9676e-13	VC_A0078	-	-	-	-	-
VC_A0235	1415.52	-0.90572	0.117722	-7.6937	1.42937e-14	8.6899e-14	VC_A0235	ackA	Acetate kinase	C	METABOLISM	Energy production and conversion
VC_1906	296.264	-0.905864	0.174469	-5.19211	2.07921e-07	7.00589e-07	VC_1906	-	putative SAM-dependent methyltransferase	Q, R	METABOLISM, POORLY CHARACTERIZED	Secondary metabolites biosynthesis, transport and catabolism, General function prediction only
VC_2188	62.5183	-0.906669	0.312473	-2.90159	0.00371274	0.00725041	VC_2188	flaA	Flagellin A	N	CELLULAR PROCESSES AND SIGNALING	Cell motility
VC_0659	4541.3	-0.908199	0.173875	-5.2233	1.75766e-07	5.98326e-07	VC_0659	prfC	Peptide chain release factor 3	J	INFORMATION STORAGE AND PROCESSING	Translation, ribosomal structure and biogenesis
VC_A0902	605.233	-0.910861	0.135844	-6.70518	2.01155e-11	9.53269e-11	VC_A0902	-	-	-	-	-
VC_2160	656.226	-0.911358	0.119508	-7.62593	2.42285e-14	1.4378e-13	VC_2160	bcp	Putative peroxiredoxin bcp	O	CELLULAR PROCESSES AND SIGNALING	Posttranslational modification, protein turnover, chaperones
VC_0835	237.381	-0.912857	0.150017	-6.08502	1.16478e-09	4.82413e-09	VC_0835	tcpT	Toxin coregulated pilus biosynthesis protein T	N, U	CELLULAR PROCESSES AND SIGNALING, CELLULAR PROCESSES AND SIGNALING	Cell motility, Intracellular trafficking, secretion, and vesicular transport
VC_0067	3997.44	-0.913797	0.0912092	-10.0187	1.26162e-23	1.49292e-22	VC_0067	-	putative XAA-PRO AMINOPEPTIDASE 1	E	METABOLISM	Amino acid transport and metabolism
VC_0348	262.183	-0.914497	0.150429	-6.07927	1.2073e-09	4.98465e-09	VC_0348	hflX	GTP-binding protein hflX	R	POORLY CHARACTERIZED	General function prediction only
VC_A0111	301.359	-0.915828	0.147307	-6.21716	5.06245e-10	2.15046e-09	VC_A0111	-	putative protein ImpH/VasB	S	POORLY CHARACTERIZED	Function unknown
VC_A0763	1818.29	-0.916816	0.131297	-6.98275	2.89453e-12	1.47169e-11	VC_A0763	ravA	ATPase ravA	R	POORLY CHARACTERIZED	General function prediction only
VC_0300	228.007	-0.917378	0.196898	-4.65916	3.17503e-06	9.3928e-06	VC_0300	-	putative signal-transduction protein containing cAMP-binding and CBS domains	T	CELLULAR PROCESSES AND SIGNALING	Signal transduction mechanisms
VC_A0825	304.35	-0.917439	0.162243	-5.65471	1.56106e-08	5.88879e-08	VC_A0825	ectA	L-2,4-diaminobutyric acid acetyltransferase	K, R	INFORMATION STORAGE AND PROCESSING, POORLY CHARACTERIZED	Transcription, General function prediction only
VC_A0887	1798.59	-0.9186	0.0955709	-9.61172	7.13475e-22	7.56474e-21	VC_A0887	-	Chaperone protein HchA (fragment)	R	POORLY CHARACTERIZED	General function prediction only
VC_2528	73.6089	-0.918669	0.275967	-3.32891	0.000871855	0.00187682	VC_2528	lptB	Lipopolysaccharide export system ATP-binding protein lptB	R	POORLY CHARACTERIZED	General function prediction only
VC_0167	48.4079	-0.919179	0.307517	-2.98903	0.0027986	0.00554698	VC_0167	rep	ATP-dependent DNA helicase rep	L	INFORMATION STORAGE AND PROCESSING	Replication, recombination and repair
VC_2011	53.8288	-0.919688	0.285694	-3.21914	0.00128576	0.0026892	VC_2011	-	-	-	-	-
VC_1811	4194.4	-0.921771	0.135514	-6.80205	1.03143e-11	4.99507e-11	VC_1811	-	conserved hypothetical protein	S	POORLY CHARACTERIZED	Function unknown
VC_1467	1430.48	-0.92196	0.118685	-7.76813	7.96521e-15	4.94067e-14	VC_1467	-	conserved hypothetical protein	K	INFORMATION STORAGE AND PROCESSING	Transcription
VC_1507	95.118	-0.926667	0.245016	-3.78207	0.000155527	0.000373414	VC_1507	aroH	Phospho-2-dehydro-3-deoxyheptonate aldolase, Trp-sensitive	E	METABOLISM	Amino acid transport and metabolism
VC_2534	61.1046	-0.928477	0.282142	-3.29081	0.000998991	0.00213089	VC_2534	-	putative Mg/Co/Ni transporter MgtE	P	METABOLISM	Inorganic ion transport and metabolism
VC_1567	3835.41	-0.93114	0.0951113	-9.79	1.24294e-22	1.41198e-21	VC_1567	-	putative ABC-type antimicrobial peptide transport system, permease component	V	CELLULAR PROCESSES AND SIGNALING	Defense mechanisms
VC_1400	147.417	-0.933441	0.219338	-4.25572	2.08374e-05	5.57908e-05	VC_1400	-	-	-	-	-
VC_0552	84.3112	-0.935792	0.249675	-3.74804	0.000178224	0.000421797	VC_0552	-	putative NADPH:quinone reductase and related Zn-dependent oxidoreductase	C, R	METABOLISM, POORLY CHARACTERIZED	Energy production and conversion, General function prediction only
VC_2536	4285.42	-0.935892	0.0965566	-9.69268	3.23927e-22	3.54996e-21	VC_2536	-	Putative alpha helix protein	S	POORLY CHARACTERIZED	Function unknown
VC_0290	959.101	-0.936376	0.112225	-8.34375	7.19718e-17	5.3588e-16	VC_0290	fis	DNA-binding protein fis	K, L	INFORMATION STORAGE AND PROCESSING, INFORMATION STORAGE AND PROCESSING	Transcription, Replication, recombination and repair
VC_2092	569.246	-0.93772	0.203124	-4.61649	3.90276e-06	1.14266e-05	VC_2092	gltA	citrate synthase	C	METABOLISM	Energy production and conversion
VC_0512	570.489	-0.939129	0.119559	-7.85497	3.99876e-15	2.55202e-14	VC_0512	-	putative methyl-accepting chemotaxis protein	N, T	CELLULAR PROCESSES AND SIGNALING, CELLULAR PROCESSES AND SIGNALING	Cell motility, Signal transduction mechanisms
VC_1064	189.057	-0.941636	0.178324	-5.28048	1.28847e-07	4.45473e-07	VC_1064	-	putative Lipoprotein-related protein	S	POORLY CHARACTERIZED	Function unknown
VC_0390	167.037	-0.942252	0.186917	-5.04103	4.63045e-07	1.49195e-06	VC_0390	metH	Methionine synthase	E	METABOLISM	Amino acid transport and metabolism
VC_A0648	41.2959	-0.942389	0.321259	-2.93342	0.00335249	0.0066053	VC_A0648	-	-	-	-	-
VC_A0715	1449.32	-0.943862	0.0938017	-10.0623	8.10666e-24	9.6793e-23	VC_A0715	-	conserved hypothetical protein	S	POORLY CHARACTERIZED	Function unknown
VC_1397	295.362	-0.94558	0.146281	-6.46412	1.01888e-10	4.54663e-10	VC_1397	-	putative Signal transduction histidine kinase CheA	N, T	CELLULAR PROCESSES AND SIGNALING, CELLULAR PROCESSES AND SIGNALING	Cell motility, Signal transduction mechanisms
VC_1736	512.529	-0.9489	0.136493	-6.95202	3.60083e-12	1.80314e-11	VC_1736	-	putative arginyl-tRNA--protein transferase	O	CELLULAR PROCESSES AND SIGNALING	Posttranslational modification, protein turnover, chaperones
VC_1095	339.281	-0.950471	0.141389	-6.72237	1.78793e-11	8.52373e-11	VC_1095	oppF	Oligopeptide transport ATP-binding protein	E	METABOLISM	Amino acid transport and metabolism
VC_0558	3301.11	-0.956706	0.115994	-8.24787	1.6124e-16	1.16774e-15	VC_0558	-	putative HEMOLYSIN-RELATED protein	P	METABOLISM	Inorganic ion transport and metabolism
VC_A0655	3468.87	-0.959352	0.135257	-7.0928	1.31426e-12	6.86661e-12	VC_A0655	-	putative sucrose-6-phosphate hydrolase	G	METABOLISM	Carbohydrate transport and metabolism
VC_0041	5206.86	-0.961576	0.10645	-9.03314	1.66815e-19	1.4739e-18	VC_0041	-	-	-	-	-
VC_1098	81.791	-0.964051	0.254254	-3.79168	0.000149632	0.000359478	VC_1098	ackA	acetate kinase	C	METABOLISM	Energy production and conversion
VC_A0128	71.8647	-0.96842	0.250906	-3.85968	0.000113533	0.000277961	VC_A0128	rbsA	Ribose import ATP-binding protein RbsA	G	METABOLISM	Carbohydrate transport and metabolism
VC_1584	360.398	-0.969891	0.147222	-6.58793	4.46012e-11	2.04302e-10	VC_1584	-	putative Ankyrin protein	R	POORLY CHARACTERIZED	General function prediction only
VC_A0792	835.986	-0.970822	0.119027	-8.1563	3.45458e-16	2.43104e-15	VC_A0792	insN	Transposase insN for insertion sequence element IS911	L	INFORMATION STORAGE AND PROCESSING	Replication, recombination and repair
VC_1355	4075.11	-0.971199	0.113191	-8.5802	9.47057e-18	7.4417e-17	VC_1355	yccX	Acylphosphatase	C	METABOLISM	Energy production and conversion
VC_0440	125.058	-0.974648	0.203681	-4.78516	1.70853e-06	5.20147e-06	VC_0440	folA	Dihydrofolate reductase	H	METABOLISM	Coenzyme transport and metabolism
VC_1166	373.992	-0.977889	0.133156	-7.34392	2.07426e-13	1.16099e-12	VC_1166	aspS	aspartyl-tRNA synthetase	J	INFORMATION STORAGE AND PROCESSING	Translation, ribosomal structure and biogenesis
VC_1163	3799.79	-0.978905	0.0898368	-10.8965	1.19799e-27	1.81111e-26	VC_1163	cmoB	tRNA (mo5U34)-methyltransferase	Q, R	METABOLISM, POORLY CHARACTERIZED	Secondary metabolites biosynthesis, transport and catabolism, General function prediction only
VC_0057	2046.13	-0.979174	0.101252	-9.67069	4.01653e-22	4.35143e-21	VC_0057	-	-	-	-	-
VC_1532	1486.35	-0.982068	0.0971555	-10.1082	5.08043e-24	6.15847e-23	VC_1532	nagK	N-acetyl-D-glucosamine kinase	G, K	METABOLISM, INFORMATION STORAGE AND PROCESSING	Carbohydrate transport and metabolism, Transcription
VC_0354	3289.27	-0.982105	0.12089	-8.12393	4.51323e-16	3.1208e-15	VC_0354	fkpA	FKBP-type peptidyl-prolyl cis-trans isomerase fkpA	O	CELLULAR PROCESSES AND SIGNALING	Posttranslational modification, protein turnover, chaperones
VC_A0142	3045.64	-0.983942	0.0890292	-11.0519	2.14632e-28	3.35976e-27	VC_A0142	dctD	C4-dicarboxylate transport transcriptional regulatory protein	T	CELLULAR PROCESSES AND SIGNALING	Signal transduction mechanisms
VC_0962	645.906	-0.986448	0.125745	-7.84484	4.3349e-15	2.75769e-14	VC_0962	miaB	(Dimethylallyl)adenosine tRNA methylthiotransferase miaB	J	INFORMATION STORAGE AND PROCESSING	Translation, ribosomal structure and biogenesis
VC_1435	157.962	-0.988557	0.234841	-4.20946	2.55977e-05	6.78961e-05	VC_1435	-	conserved hypothetical protein	S	POORLY CHARACTERIZED	Function unknown
VC_1272	717.98	-0.988599	0.119946	-8.24207	1.69261e-16	1.22138e-15	VC_1272	-	-	-	-	-
VC_A0712	53.0032	-0.993583	0.285487	-3.48031	0.000500839	0.00112441	VC_A0712	pncA	Pyrazinamidase/nicotinamidase	Q	METABOLISM	Secondary metabolites biosynthesis, transport and catabolism
VC_A0926	83.5763	-0.996783	0.317421	-3.14025	0.00168802	0.00346136	VC_A0926	-	putative Bacterial regulatory helix-turn-helix proteins, AraC family	K	INFORMATION STORAGE AND PROCESSING	Transcription
VC_1345	541.936	-0.998755	0.113891	-8.7694	1.79616e-18	1.48782e-17	VC_1345	-	putative Homogentisate 1,2-dioxygenase	Q	METABOLISM	Secondary metabolites biosynthesis, transport and catabolism
VC_A0681	154.48	-1.00088	0.192817	-5.19083	2.09356e-07	7.03634e-07	VC_A0681	-	putative Metal dependent phosphohydrolase with conserved 'HD' motif	T	CELLULAR PROCESSES AND SIGNALING	Signal transduction mechanisms
VC_A0609	120.258	-1.00471	0.202274	-4.96706	6.7977e-07	2.16394e-06	VC_A0609	-	-	-	-	-
VC_1671	5029.99	-1.00726	0.0997758	-10.0952	5.79896e-24	6.98687e-23	VC_1671	metC	cystathionine beta-lyase, PLP-dependent	E	METABOLISM	Amino acid transport and metabolism
VC_0029	52.8477	-1.00808	0.317082	-3.17924	0.00147659	0.00305621	VC_0029	ilvE	Branched-chain-amino-acid aminotransferase	E, H	METABOLISM, METABOLISM	Amino acid transport and metabolism, Coenzyme transport and metabolism
VC_1790	192.669	-1.00949	0.163203	-6.18549	6.191e-10	2.61033e-09	VC_1790	insN	Transposase insN for insertion sequence element IS911	L	INFORMATION STORAGE AND PROCESSING	Replication, recombination and repair
VC_2000	2330.73	-1.01446	0.107993	-9.39371	5.79236e-21	5.77204e-20	VC_2000	gapA	glyceraldehyde-3-phosphate dehydrogenase A	G	METABOLISM	Carbohydrate transport and metabolism
VC_0797	150.007	-1.01656	0.228604	-4.44681	8.71554e-06	2.44379e-05	VC_0797	citD	Citrate lyase acyl carrier protein	C	METABOLISM	Energy production and conversion
VC_A1015	2800.46	-1.01728	0.108256	-9.39704	5.61172e-21	5.60608e-20	VC_A1015	-	Putative Na+/H+ antiporter NhaD type -	P	METABOLISM	Inorganic ion transport and metabolism
VC_2113	2210.82	-1.01735	0.127709	-7.96619	1.63642e-15	1.0826e-14	VC_2113	-	conserved hypothetical protein	S	POORLY CHARACTERIZED	Function unknown
VC_A0759	895.353	-1.01829	0.11211	-9.08293	1.0569e-19	9.52884e-19	VC_A0759	artJ	ABC transporter arginine-binding protein	E, T	METABOLISM, CELLULAR PROCESSES AND SIGNALING	Amino acid transport and metabolism, Signal transduction mechanisms
VC_0322	1843.68	-1.01902	0.112801	-9.0338	1.65815e-19	1.46833e-18	VC_0322	secE	Preprotein translocase subunit secE	U	CELLULAR PROCESSES AND SIGNALING	Intracellular trafficking, secretion, and vesicular transport
VC_1789	43.4453	-1.0196	0.31473	-3.23961	0.00119695	0.00251536	VC_1789	-	putative transposase OrfB	L	INFORMATION STORAGE AND PROCESSING	Replication, recombination and repair
VC_0566	384.048	-1.01999	0.138892	-7.3438	2.07611e-13	1.16099e-12	VC_0566	degP	Protease do	O	CELLULAR PROCESSES AND SIGNALING	Posttranslational modification, protein turnover, chaperones
VC_1196	4632.5	-1.02092	0.0852511	-11.9754	4.78081e-33	1.00045e-31	VC_1196	-	-	-	-	-
VC_0055	2447.63	-1.02204	0.156133	-6.54594	5.9122e-11	2.68038e-10	VC_0055	hemF	Coproporphyrinogen-III oxidase, aerobic	H	METABOLISM	Coenzyme transport and metabolism
VC_0793	117.184	-1.024	0.218676	-4.68272	2.83089e-06	8.42487e-06	VC_0793	oadA	fragment of Oxaloacetate decarboxylase alpha chain (part 1)	C	METABOLISM	Energy production and conversion
VC_0674	88.0175	-1.02538	0.228295	-4.49146	7.07359e-06	2.0046e-05	VC_0674	lgt	Prolipoprotein diacylglyceryl transferase	M	CELLULAR PROCESSES AND SIGNALING	Cell wall/membrane/envelope biogenesis
VC_1034	115.822	-1.02923	0.214246	-4.80396	1.55556e-06	4.76496e-06	VC_1034	udp	uridine phosphorylase	F	METABOLISM	Nucleotide transport and metabolism
VC_A0778	204.071	-1.02982	0.170497	-6.04012	1.53997e-09	6.27348e-09	VC_A0778	-	putative Allophanate hydrolase subunit 2	E	METABOLISM	Amino acid transport and metabolism
VC_A0272	385.631	-1.02994	0.134319	-7.66789	1.74855e-14	1.05177e-13	VC_A0272	-	-	-	-	-
VC_2567	374.738	-1.03196	0.14215	-7.25964	3.88128e-13	2.10819e-12	VC_2567	-	putative Opacity-associated protein A	M	CELLULAR PROCESSES AND SIGNALING	Cell wall/membrane/envelope biogenesis
VC_2098	603.959	-1.03259	0.133646	-7.72631	1.10711e-14	6.78254e-14	VC_2098	-	-	-	-	-
VC_1748	3518.63	-1.03405	0.146627	-7.05222	1.76088e-12	9.14004e-12	VC_1748	-	-	-	-	-
VC_1627	548.388	-1.03584	0.13238	-7.82471	5.08817e-15	3.21631e-14	VC_1627	nhaA	Na(+)/H(+) antiporter nhaA	P	METABOLISM	Inorganic ion transport and metabolism
VC_2661	2322.97	-1.0375	0.10992	-9.43868	3.7751e-21	3.84866e-20	VC_2661	-	putative Lysine 2,3-aminomutase	E	METABOLISM	Amino acid transport and metabolism
VC_2382	512.243	-1.03824	0.124339	-8.3501	6.82069e-17	5.09757e-16	VC_2382	-	conserved hypothetical protein	S	POORLY CHARACTERIZED	Function unknown
VC_1927	174.554	-1.0387	0.175355	-5.92339	3.15373e-09	1.26149e-08	VC_1927	-	putative TRAP-type C4-dicarboxylate transport system, large permease component DctM	G	METABOLISM	Carbohydrate transport and metabolism
VC_A0614	24788.2	-1.04033	0.0976574	-10.6528	1.69159e-26	2.41066e-25	VC_A0614	fhs	Formate--tetrahydrofolate ligase	F	METABOLISM	Nucleotide transport and metabolism
VC_1528	4262.29	-1.04089	0.288786	-3.60437	0.00031291	0.000718734	VC_1528	-	-	-	-	-
VC_1735	304.669	-1.04094	0.147473	-7.05851	1.68301e-12	8.74726e-12	VC_1735	aat	Leucyl/phenylalanyl-tRNA--protein transferase	O	CELLULAR PROCESSES AND SIGNALING	Posttranslational modification, protein turnover, chaperones
VC_1720	445.192	-1.04258	0.135474	-7.69578	1.40638e-14	8.5632e-14	VC_1720	-	putative Chaperone protein torD	R	POORLY CHARACTERIZED	General function prediction only
VC_0796	442.243	-1.04573	0.123911	-8.43935	3.19111e-17	2.41674e-16	VC_0796	citC	[Citrate [pro-3S]-lyase] ligase	C	METABOLISM	Energy production and conversion
VC_0605	285.699	-1.04582	0.163123	-6.41123	1.44348e-10	6.34175e-10	VC_0605	-	conserved hypothetical protein	S	POORLY CHARACTERIZED	Function unknown
VC_A0521	720.604	-1.04836	0.135351	-7.74547	9.52266e-15	5.87009e-14	VC_A0521	-	putative Exonuclease SbcC	L	INFORMATION STORAGE AND PROCESSING	Replication, recombination and repair
VC_2700	3836.68	-1.04916	0.157938	-6.64291	3.07555e-11	1.43357e-10	VC_2700	-	Thiamine transport system permease protein ThiP	G	METABOLISM	Carbohydrate transport and metabolism
VC_A0033	788.581	-1.04967	0.132479	-7.92327	2.31351e-15	1.50906e-14	VC_A0033	-	Alkaline phosphatase	R	POORLY CHARACTERIZED	General function prediction only
VC_0898	295.726	-1.05426	0.145218	-7.25986	3.87489e-13	2.1076e-12	VC_0898	xni	Uncharacterized exonuclease xni	L	INFORMATION STORAGE AND PROCESSING	Replication, recombination and repair
VC_0619	338.957	-1.05478	0.13329	-7.91339	2.50474e-15	1.62992e-14	VC_0619	-	putative ABC-type dipeptide/oligopeptide/nickel transport system, permease component	E, P	METABOLISM, METABOLISM	Amino acid transport and metabolism, Inorganic ion transport and metabolism
VC_0662	1003.69	-1.0581	0.119428	-8.85972	8.02165e-19	6.80044e-18	VC_0662	braB	Branched-chain amino acid transport system 2 carrier protein	E	METABOLISM	Amino acid transport and metabolism
VC_1462	240.13	-1.05913	0.153758	-6.88829	5.64678e-12	2.79596e-11	VC_1462	-	-	-	-	-
VC_2174	70.1593	-1.0592	0.276635	-3.82887	0.000128731	0.000312857	VC_2174	ushA	Protein UshA [Includes: UDP-sugar hydrolase ; 5'-nucleotidase]	F	METABOLISM	Nucleotide transport and metabolism
VC_2549	310.013	-1.0615	0.159453	-6.6571	2.79279e-11	1.30791e-10	VC_2549	msrA	Peptide methionine sulfoxide reductase msrA	O	CELLULAR PROCESSES AND SIGNALING	Posttranslational modification, protein turnover, chaperones
VC_A0428	505.532	-1.06498	0.131433	-8.10283	5.36946e-16	3.6936e-15	VC_A0428	-	-	-	-	-
VC_1541	371.715	-1.0672	0.148044	-7.2087	5.64888e-13	3.03103e-12	VC_1541	-	-	-	-	-
VC_1501	59.0996	-1.06749	0.274602	-3.8874	0.000101322	0.00024991	VC_1501	-	putative Paraquat-inducible protein B	R	POORLY CHARACTERIZED	General function prediction only
VC_A0895	438.125	-1.06932	0.131027	-8.16105	3.32131e-16	2.34141e-15	VC_A0895	-	putative c-di-GMP phosphodiesterase class II with HAMP domain	N, T	CELLULAR PROCESSES AND SIGNALING, CELLULAR PROCESSES AND SIGNALING	Cell motility, Signal transduction mechanisms
VC_A0584	467.977	-1.07017	0.368323	-2.90552	0.0036664	0.00717544	VC_A0584	-	Glutathione S-transferase	O	CELLULAR PROCESSES AND SIGNALING	Posttranslational modification, protein turnover, chaperones
VC_1148	230.323	-1.07139	0.167884	-6.38174	1.75091e-10	7.63333e-10	VC_1148	hexR	HTH-type transcriptional regulator hexR	K	INFORMATION STORAGE AND PROCESSING	Transcription
VC_A0791	195.836	-1.07359	0.194465	-5.52072	3.3762e-08	1.23607e-07	VC_A0791	-	putative transposase OrfB	L	INFORMATION STORAGE AND PROCESSING	Replication, recombination and repair
VC_0900	46.9909	-1.07529	0.328256	-3.27576	0.00105378	0.00223815	VC_0900	-	putative ATPase involved in DNA repair fused with GGDEF family protein	L, T	INFORMATION STORAGE AND PROCESSING, CELLULAR PROCESSES AND SIGNALING	Replication, recombination and repair, Signal transduction mechanisms
VC_2635	145.857	-1.07568	0.190602	-5.64356	1.66568e-08	6.26561e-08	VC_2635	mrcA	Penicillin-binding protein 1A [Includes: Penicillin-insensitive transglycosylase ; Penicillin-sensitive transpeptidase]	M	CELLULAR PROCESSES AND SIGNALING	Cell wall/membrane/envelope biogenesis
VC_A0653	256.106	-1.07577	0.151049	-7.12198	1.06384e-12	5.61731e-12	VC_A0653	scrA	PTS system sucrose-specific EIIBC component [Includes: Sucrose-specific phosphotransferase enzyme IIB component ; Sucrose permease IIC component]	G	METABOLISM	Carbohydrate transport and metabolism
VC_2471	50.5635	-1.07728	0.328902	-3.27538	0.00105521	0.00223999	VC_2471	-	conserved hypothetical protein	S	POORLY CHARACTERIZED	Function unknown
VC_1639	1116.64	-1.07833	0.116505	-9.25566	2.12907e-20	2.04968e-19	VC_1639	-	putative Sensor histidine kinase	T	CELLULAR PROCESSES AND SIGNALING	Signal transduction mechanisms
VC_2421	947.454	-1.07839	0.121689	-8.86191	7.8653e-19	6.68214e-18	VC_2421	ampD	1,6-anhydro-N-acetylmuramyl-L-alanine amidase AmpD	V	CELLULAR PROCESSES AND SIGNALING	Defense mechanisms
VC_1114	732.031	-1.0784	0.118132	-9.12879	6.92721e-20	6.34622e-19	VC_1114	bioC	biotin synthesis protein BioC	Q, R	METABOLISM, POORLY CHARACTERIZED	Secondary metabolites biosynthesis, transport and catabolism, General function prediction only
VC_A0276	121.006	-1.07938	0.25684	-4.20252	2.63959e-05	6.99668e-05	VC_A0276	gcvP	fragment of Glycine dehydrogenase [decarboxylating] (part 2)	E	METABOLISM	Amino acid transport and metabolism
VC_2150	99.6848	-1.08028	0.261241	-4.13519	3.54668e-05	9.2107e-05	VC_2150	-	putative a glutathione-dependent thiol reductase	P	METABOLISM	Inorganic ion transport and metabolism
VC_0339	2298.05	-1.08031	0.100887	-10.7081	9.32663e-27	1.35338e-25	VC_0339	psd	Phosphatidylserine decarboxylase proenzyme	I	METABOLISM	Lipid transport and metabolism
VC_2288	548.073	-1.08589	0.139358	-7.79209	6.59122e-15	4.13355e-14	VC_2288	-	conserved hypothetical protein	S	POORLY CHARACTERIZED	Function unknown
VC_2673	3700.41	-1.08639	0.0897889	-12.0994	1.06364e-33	2.28596e-32	VC_2673	menA	1,4-dihydroxy-2-naphthoate octaprenyltransferase	H	METABOLISM	Coenzyme transport and metabolism
VC_A0723	10870.4	-1.088	0.133197	-8.16834	3.12652e-16	2.21193e-15	VC_A0723	-	putative Hydroxymethylglutaryl-CoA reductase	I	METABOLISM	Lipid transport and metabolism
VC_1460	42.1688	-1.089	0.316994	-3.43541	0.000591665	0.00131129	VC_1460	-	-	-	-	-
VC_1692	568.387	-1.09352	0.21403	-5.10918	3.23553e-07	1.06406e-06	VC_1692	torA	Trimethylamine-N-oxide reductase precursor (TMAO reductase) (Trimethylamine oxidase)	C	METABOLISM	Energy production and conversion
VC_0393	261.201	-1.09476	0.148185	-7.38779	1.49289e-13	8.38114e-13	VC_0393	-	putative Lipid A core - O-antigen ligase and related enzyme	M	CELLULAR PROCESSES AND SIGNALING	Cell wall/membrane/envelope biogenesis
VC_2065	2519.06	-1.0958	0.0974533	-11.2443	2.46933e-29	4.23192e-28	VC_2065	cheY	Chemotaxis protein cheY	T	CELLULAR PROCESSES AND SIGNALING	Signal transduction mechanisms
VC_0485	28092.2	-1.09604	0.159923	-6.85356	7.20368e-12	3.52298e-11	VC_0485	pykF	Pyruvate kinase I	G	METABOLISM	Carbohydrate transport and metabolism
VC_1452	816.316	-1.09784	0.325573	-3.37203	0.000746158	0.00162027	VC_1452	-	-	-	-	-
VC_0972	340.497	-1.09812	0.204312	-5.37473	7.66956e-08	2.72026e-07	VC_0972	chiP	Chitoporin	M	CELLULAR PROCESSES AND SIGNALING	Cell wall/membrane/envelope biogenesis
VC_1315	287.058	-1.10186	0.143638	-7.67108	1.70555e-14	1.02746e-13	VC_1315	-	putative Sensor histidine kinase	T	CELLULAR PROCESSES AND SIGNALING	Signal transduction mechanisms
VC_0192	4812.94	-1.10472	0.0932658	-11.8449	2.28736e-32	4.57012e-31	VC_0192	-	putative AraC family transcriptional regulator with Cupin domain	K	INFORMATION STORAGE AND PROCESSING	Transcription
VC_A0188	144.636	-1.10782	0.206009	-5.37754	7.55117e-08	2.68066e-07	VC_A0188	-	-	-	-	-
VC_2328	251.739	-1.10941	0.167259	-6.6329	3.29165e-11	1.52714e-10	VC_2328	-	-	-	-	-
VC_2443	1221.22	-1.11057	0.188675	-5.88618	3.95231e-09	1.56674e-08	VC_2443	-	putative SH3 domain protein	T	CELLULAR PROCESSES AND SIGNALING	Signal transduction mechanisms
VC_1131	37.8287	-1.11172	0.352662	-3.15236	0.00161958	0.00332959	VC_1131	-	putative Na+/H+ antiporter NhaC-like	C	METABOLISM	Energy production and conversion
VC_2551	117.592	-1.1124	0.268892	-4.13697	3.5192e-05	9.1513e-05	VC_2551	-	-	-	-	-
VC_1685	772.125	-1.1132	0.129188	-8.61685	6.88186e-18	5.47246e-17	VC_1685	-	-	-	-	-
VC_1932	351.921	-1.11659	0.141128	-7.91192	2.53441e-15	1.64654e-14	VC_1932	-	-	-	-	-
VC_2629	624.529	-1.11759	0.206315	-5.4169	6.06418e-08	2.17414e-07	VC_2629	aroK	shikimate kinase I	E	METABOLISM	Amino acid transport and metabolism
VC_A0667	413.882	-1.11907	0.167653	-6.67493	2.47351e-11	1.16525e-10	VC_A0667	-	putative Na+/proline symporter	E, R	METABOLISM, POORLY CHARACTERIZED	Amino acid transport and metabolism, General function prediction only
VC_1851	1237.06	-1.12292	0.102453	-10.9604	5.92179e-28	9.05578e-27	VC_1851	-	putative signal transduction protein	T	CELLULAR PROCESSES AND SIGNALING	Signal transduction mechanisms
VC_1429	385.545	-1.12476	0.151099	-7.44383	9.78089e-14	5.54762e-13	VC_1429	-	putative Permease of the major facilitator superfamily	E	METABOLISM	Amino acid transport and metabolism
VC_1043	436.089	-1.12642	0.132716	-8.48743	2.11253e-17	1.61839e-16	VC_1043	-	putative Long-chain fatty acid transport protein	I	METABOLISM	Lipid transport and metabolism
VC_0275	165.462	-1.12705	0.175666	-6.41588	1.40016e-10	6.16505e-10	VC_0275	purD	Phosphoribosylamine--glycine ligase	F	METABOLISM	Nucleotide transport and metabolism
VC_A0956	1585.78	-1.13022	0.117131	-9.64914	4.95697e-22	5.32673e-21	VC_A0956	-	putative GGDEF family protein	T	CELLULAR PROCESSES AND SIGNALING	Signal transduction mechanisms
VC_0398	230.043	-1.13023	0.177111	-6.38147	1.754e-10	7.63845e-10	VC_0398	-	putative regulatory protein CsrD	T	CELLULAR PROCESSES AND SIGNALING	Signal transduction mechanisms
VC_1995	226.833	-1.13045	0.169762	-6.65904	2.75631e-11	1.29234e-10	VC_1995	ansA	L-asparaginase I	E, J	METABOLISM, INFORMATION STORAGE AND PROCESSING	Amino acid transport and metabolism, Translation, ribosomal structure and biogenesis
VC_1440	782.816	-1.13209	0.110396	-10.2548	1.1262e-24	1.43518e-23	VC_1440	ccoQ	Cytochrome c oxidase, cbb3-type, CcoQ subunit	O	CELLULAR PROCESSES AND SIGNALING	Posttranslational modification, protein turnover, chaperones
VC_A0802	96.8101	-1.1349	0.22313	-5.08626	3.65193e-07	1.19213e-06	VC_A0802	-	putative Phosphoglycerol transferase and related protein	M	CELLULAR PROCESSES AND SIGNALING	Cell wall/membrane/envelope biogenesis
VC_0788	2400.26	-1.13578	0.139532	-8.1399	3.95605e-16	2.75468e-15	VC_0788	-	putative Dopa 4,5-dioxygenase	Q	METABOLISM	Secondary metabolites biosynthesis, transport and catabolism
VC_A1096	34.0246	-1.138	0.344262	-3.30561	0.00094769	0.00203018	VC_A1096	cheY	Chemotaxis protein cheY	T	CELLULAR PROCESSES AND SIGNALING	Signal transduction mechanisms
VC_2343	500.347	-1.13854	0.136015	-8.37068	5.72843e-17	4.2974e-16	VC_2343	radA	DNA repair protein radA	O	CELLULAR PROCESSES AND SIGNALING	Posttranslational modification, protein turnover, chaperones
VC_0787	380.162	-1.13932	0.134142	-8.49335	2.00762e-17	1.54098e-16	VC_0787	-	putative Transcriptional regulator, LysR family	K	INFORMATION STORAGE AND PROCESSING	Transcription
VC_2712	1468.76	-1.13987	0.142497	-7.99922	1.25208e-15	8.38091e-15	VC_2712	xanP	Xanthine permease XanP	F	METABOLISM	Nucleotide transport and metabolism
VC_0267	1729.45	-1.14015	0.0941752	-12.1067	9.73056e-34	2.10265e-32	VC_0267	-	putative 2-hydroxyacid dehydrogenase	E, H	METABOLISM, METABOLISM	Amino acid transport and metabolism, Coenzyme transport and metabolism
VC_A0191	426.952	-1.1404	0.126943	-8.98356	2.6214e-19	2.29575e-18	VC_A0191	-	putative carbohydrate kinase	G, S	METABOLISM, POORLY CHARACTERIZED	Carbohydrate transport and metabolism, Function unknown
VC_1957	8134.55	-1.14421	0.0946698	-12.0863	1.2475e-33	2.6667e-32	VC_1957	-	conserved hypothetical protein	S	POORLY CHARACTERIZED	Function unknown
VC_2208	164.737	-1.14537	0.194242	-5.89663	3.71001e-09	1.4751e-08	VC_2208	-	-	-	-	-
VC_A1048	1384.07	-1.14936	0.0990551	-11.6033	3.96658e-31	7.59014e-30	VC_A1048	-	Putative Oxidoreductase, Gfo/Idh/MocA family	R	POORLY CHARACTERIZED	General function prediction only
VC_1169	349.971	-1.14999	0.137765	-8.3475	6.97223e-17	5.20104e-16	VC_1169	trpA	Tryptophan synthase alpha chain	E	METABOLISM	Amino acid transport and metabolism
VC_2467	194.751	-1.15232	0.18332	-6.28584	3.26081e-10	1.39859e-09	VC_2467	rpoE	RNA polymerase sigma-E factor (sigma 24)	K	INFORMATION STORAGE AND PROCESSING	Transcription
VC_A0787	969.853	-1.15309	0.108455	-10.6319	2.11701e-26	2.99546e-25	VC_A0787	-	-	-	-	-
VC_2553	286.649	-1.15487	0.151226	-7.6367	2.22861e-14	1.32649e-13	VC_2553	-	putative ABC-type antimicrobial peptide transport system, ATPase component	V	CELLULAR PROCESSES AND SIGNALING	Defense mechanisms
VC_2149	196.442	-1.1567	0.167826	-6.8923	5.48969e-12	2.72157e-11	VC_2149	-	conserved hypothetical protein	S	POORLY CHARACTERIZED	Function unknown
VC_2265	6931.73	-1.161	0.0937086	-12.3895	2.98039e-35	7.18183e-34	VC_2265	pgpA	phosphatidylglycerophosphatase A	I	METABOLISM	Lipid transport and metabolism
VC_1278	92.3287	-1.16283	0.230136	-5.05277	4.35458e-07	1.40648e-06	VC_1278	-	putative Bacterial regulatory protein, MarR family	K	INFORMATION STORAGE AND PROCESSING	Transcription
VC_A0868	815.251	-1.16571	0.138524	-8.41516	3.92367e-17	2.96025e-16	VC_A0868	-	-	-	-	-
VC_A0730	505.096	-1.16842	0.128225	-9.11226	8.06866e-20	7.34119e-19	VC_A0730	-	putative SIR2-like domain protein	K	INFORMATION STORAGE AND PROCESSING	Transcription
VC_0807	215.541	-1.16897	0.173445	-6.73976	1.58649e-11	7.5907e-11	VC_0807	-	-	-	-	-
VC_A0692	280.762	-1.17012	0.170061	-6.88062	5.95923e-12	2.947e-11	VC_A0692	-	fragment of putative SecD/SecF/SecDF export membrane protein (part 2)	U	CELLULAR PROCESSES AND SIGNALING	Intracellular trafficking, secretion, and vesicular transport
VC_1511	427.36	-1.17226	0.136011	-8.61885	6.76292e-18	5.38865e-17	VC_1511	-	putative Formate dehydrogenase subunit	C	METABOLISM	Energy production and conversion
VC_A0245	158.391	-1.17467	0.213937	-5.49072	4.00303e-08	1.45885e-07	VC_A0245	ulaC	Ascorbate-specific phosphotransferase enzyme IIA component	G, T	METABOLISM, CELLULAR PROCESSES AND SIGNALING	Carbohydrate transport and metabolism, Signal transduction mechanisms
VC_0542	1006.81	-1.17714	0.101809	-11.5623	6.40001e-31	1.21174e-29	VC_0542	-	putative competence damage-inducible protein A	R	POORLY CHARACTERIZED	General function prediction only
VC_A0686	527.095	-1.17735	0.12975	-9.07397	1.14756e-19	1.02764e-18	VC_A0686	fbpB	Ferric transport system permease protein fbpB	P	METABOLISM	Inorganic ion transport and metabolism
VC_2225	2135.87	-1.17851	0.115519	-10.2019	1.94389e-24	2.43814e-23	VC_2225	upp	uracil phosphoribosyltransferase	F	METABOLISM	Nucleotide transport and metabolism
VC_1478	4505.84	-1.17985	0.136656	-8.63374	5.93784e-18	4.74073e-17	VC_1478	-	putative transposase OrfB	L	INFORMATION STORAGE AND PROCESSING	Replication, recombination and repair
VC_2482	133.477	-1.18216	0.202276	-5.84428	5.08755e-09	1.99882e-08	VC_2482	ilvH	Acetolactate synthase isozyme 3 small subunit	E	METABOLISM	Amino acid transport and metabolism
VC_A0345	1172.32	-1.18511	0.112057	-10.576	3.85113e-26	5.37267e-25	VC_A0345	-	conserved hypothetical protein	S	POORLY CHARACTERIZED	Function unknown
VC_t088	103.079	-1.18713	0.32423	-3.66137	0.000250872	0.000584682	VC_t088	-	-	-	-	-
VC_2285	1162.82	-1.1887	0.123896	-9.59441	8.4396e-22	8.90076e-21	VC_2285	-	putative GGDEF family protein	T	CELLULAR PROCESSES AND SIGNALING	Signal transduction mechanisms
VC_0617	267.882	-1.18994	0.162644	-7.31623	2.55037e-13	1.40265e-12	VC_0617	-	putative ABC-type dipeptide/oligopeptide/nickel transport system, ATPase component	E, P	METABOLISM, METABOLISM	Amino acid transport and metabolism, Inorganic ion transport and metabolism
VC_1173	249.391	-1.19052	0.155598	-7.65125	1.9903e-14	1.18999e-13	VC_1173	trpG	Anthranilate synthase component II	E, H	METABOLISM, METABOLISM	Amino acid transport and metabolism, Coenzyme transport and metabolism
VC_1401	1201.99	-1.19417	0.100458	-11.8873	1.37844e-32	2.79626e-31	VC_1401	-	putative Chemotaxis response regulator protein-glutamate methylesterase CheB	N, T	CELLULAR PROCESSES AND SIGNALING, CELLULAR PROCESSES AND SIGNALING	Cell motility, Signal transduction mechanisms
VC_0910	592.646	-1.19919	0.141036	-8.50274	1.85167e-17	1.42679e-16	VC_0910	treB	PTS system trehalose-specific EIIBC component [Includes: Trehalose-specific phosphotransferase enzyme IIB component ; Trehalose permease IIC component]	G	METABOLISM	Carbohydrate transport and metabolism
VC_A0872	35710.4	-1.19945	0.139334	-8.60841	7.40811e-18	5.87917e-17	VC_A0872	cydA	Cytochrome d ubiquinol oxidase subunit 1	C	METABOLISM	Energy production and conversion
VC_2516	730.968	-1.20269	0.113941	-10.5554	4.7975e-26	6.62322e-25	VC_2516	-	putative Anti-sigma B factor antagonist	R	POORLY CHARACTERIZED	General function prediction only
VC_A1026	77.4614	-1.20415	0.254468	-4.73202	2.22293e-06	6.67047e-06	VC_A1026	-	Putative TPR repeat protein, SEL1 subfamily -	R	POORLY CHARACTERIZED	General function prediction only
VC_1843	35.4736	-1.20709	0.341329	-3.53643	0.000405572	0.000919358	VC_1843	cydB	Cytochrome d ubiquinol oxidase subunit 2	C	METABOLISM	Energy production and conversion
VC_1000	221.887	-1.20891	0.200519	-6.02893	1.65048e-09	6.69624e-09	VC_1000	accD	Acetyl-coenzyme A carboxylase carboxyl transferase subunit beta	I	METABOLISM	Lipid transport and metabolism
VC_0691	8626.45	-1.20939	0.148771	-8.12921	4.3209e-16	2.99824e-15	VC_0691	anmK	Anhydro-N-acetylmuramic acid kinase	O	CELLULAR PROCESSES AND SIGNALING	Posttranslational modification, protein turnover, chaperones
VC_0030	129.38	-1.20948	0.264268	-4.5767	4.72366e-06	1.3689e-05	VC_0030	-	putative Acetolactate synthase, small (regulatory) subunit	S	POORLY CHARACTERIZED	Function unknown
VC_1284	316.88	-1.21027	0.156419	-7.73737	1.01495e-14	6.24679e-14	VC_1284	chbF	6-phospho-beta-glucosidase	G	METABOLISM	Carbohydrate transport and metabolism
VC_A0529	7211.47	-1.21251	0.317284	-3.82155	0.000132616	0.000321514	VC_A0529	kup	Low affinity potassium transport system protein kup	P	METABOLISM	Inorganic ion transport and metabolism
VC_1066	659.663	-1.21369	0.172763	-7.02515	2.13842e-12	1.09708e-11	VC_1066	-	conserved hypothetical protein	I	METABOLISM	Lipid transport and metabolism
VC_A0204	226.617	-1.21558	0.195991	-6.20219	5.56842e-10	2.35532e-09	VC_A0204	rhlE	ATP-dependent RNA helicase rhlE	J, K, L	INFORMATION STORAGE AND PROCESSING, INFORMATION STORAGE AND PROCESSING, INFORMATION STORAGE AND PROCESSING	Translation, ribosomal structure and biogenesis, Transcription, Replication, recombination and repair
VC_A0371	1123.98	-1.21631	0.129197	-9.41444	4.75596e-21	4.81163e-20	VC_A0371	-	putative transposase OrfB	L	INFORMATION STORAGE AND PROCESSING	Replication, recombination and repair
VC_A0978	679.448	-1.22214	0.118063	-10.3516	4.11599e-25	5.36563e-24	VC_A0978	-	putative Amino acid ABC transporter, periplasmic amino acid-binding protein	E, T	METABOLISM, CELLULAR PROCESSES AND SIGNALING	Amino acid transport and metabolism, Signal transduction mechanisms
VC_1770	387.761	-1.22726	0.140053	-8.76281	1.90436e-18	1.5709e-17	VC_1770	-	-	-	-	-
VC_1417	71.7428	-1.22884	0.260747	-4.71277	2.44368e-06	7.31632e-06	VC_1417	-	-	-	-	-
VC_0066	39861.3	-1.23127	0.136824	-8.9989	2.27988e-19	2.00106e-18	VC_0066	thiH	2-iminoacetate synthase	H, R	METABOLISM, POORLY CHARACTERIZED	Coenzyme transport and metabolism, General function prediction only
VC_1969	591.197	-1.23466	0.134868	-9.15464	5.45408e-20	5.04312e-19	VC_1969	-	-	-	-	-
VC_A0003	34797.3	-1.2363	0.139802	-8.84319	9.30218e-19	7.86924e-18	VC_A0003	-	-	-	-	-
VC_0437	52115.6	-1.24177	0.15594	-7.96313	1.67736e-15	1.10784e-14	VC_0437	-	putative DEVELOPMENTALLY REGULATED GTP-BINDING PROTEIN-RELATED	R	POORLY CHARACTERIZED	General function prediction only
VC_A1010	9345.46	-1.24384	0.127041	-9.79084	1.23264e-22	1.4043e-21	VC_A1010	-	putative Multidrug resistance efflux transporter EmrE	E, G, R	METABOLISM, METABOLISM, POORLY CHARACTERIZED	Amino acid transport and metabolism, Carbohydrate transport and metabolism, General function prediction only
VC_A0361	280.504	-1.2448	0.150513	-8.27038	1.33536e-16	9.7599e-16	VC_A0361	-	-	-	-	-
VC_1312	222.196	-1.25295	0.16198	-7.73522	1.03222e-14	6.34329e-14	VC_1312	-	putative Alanine racemase	M	CELLULAR PROCESSES AND SIGNALING	Cell wall/membrane/envelope biogenesis
VC_0222	64.739	-1.25412	0.276341	-4.53831	5.67055e-06	1.62436e-05	VC_0222	coaD	Phosphopantetheine adenylyltransferase	H	METABOLISM	Coenzyme transport and metabolism
VC_1564	2777.71	-1.25547	0.111847	-11.2249	3.07792e-29	5.23285e-28	VC_1564	-	-	-	-	-
VC_0742	717.352	-1.25639	0.167023	-7.52226	5.38368e-14	3.11579e-13	VC_0742	yajC	SecYEG protein translocase auxillary subunit	U	CELLULAR PROCESSES AND SIGNALING	Intracellular trafficking, secretion, and vesicular transport
VC_2212	44.8881	-1.25665	0.333025	-3.77346	0.000161001	0.000385394	VC_2212	-	-	-	-	-
VC_A0935	28.0092	-1.25709	0.396539	-3.17015	0.00152359	0.00314364	VC_A0935	-	-	-	-	-
VC_1517	745.789	-1.25934	0.123874	-10.1664	2.80211e-24	3.46313e-23	VC_1517	-	-	-	-	-
VC_0027	85.8695	-1.26011	0.228849	-5.50629	3.66473e-08	1.34047e-07	VC_0027	ilvA	Threonine dehydratase biosynthetic	E	METABOLISM	Amino acid transport and metabolism
VC_A0711	66.7145	-1.2604	0.291849	-4.31868	1.56968e-05	4.27762e-05	VC_A0711	mgsA	methylglyoxal synthase	G	METABOLISM	Carbohydrate transport and metabolism
VC_A0264	121.071	-1.26076	0.244334	-5.15999	2.4697e-07	8.22404e-07	VC_A0264	-	putative MerR HTH family regulatory protein fused with S-adenosylmethionine-dependent methyltransferase	K, Q, R	INFORMATION STORAGE AND PROCESSING, METABOLISM, POORLY CHARACTERIZED	Transcription, Secondary metabolites biosynthesis, transport and catabolism, General function prediction only
VC_1754	533.9	-1.26338	0.12688	-9.95726	2.34432e-23	2.73343e-22	VC_1754	pqiB	Paraquat-inducible protein B	R	POORLY CHARACTERIZED	General function prediction only
VC_0548	17083.8	-1.26627	0.154828	-8.17857	2.8724e-16	2.03941e-15	VC_0548	csrA	Carbon storage regulator homolog	T	CELLULAR PROCESSES AND SIGNALING	Signal transduction mechanisms
VC_1687	31.1069	-1.26776	0.369597	-3.43012	0.000603319	0.00133341	VC_1687	-	putative manganese-dependent inorganic pyrophosphatase	C	METABOLISM	Energy production and conversion
VC_0940	300.219	-1.27288	0.148011	-8.5999	7.97825e-18	6.29395e-17	VC_0940	-	conserved hypothetical protein	S	POORLY CHARACTERIZED	Function unknown
VC_A0153	422.946	-1.2752	0.138197	-9.22743	2.77191e-20	2.63034e-19	VC_A0153	-	putative Na(+) H(+) antiporter subunit F	P	METABOLISM	Inorganic ion transport and metabolism
VC_1357	288.138	-1.27605	0.145088	-8.79501	1.43032e-18	1.19474e-17	VC_1357	-	-	-	-	-
VC_2721	60802	-1.27759	0.146125	-8.74315	2.26705e-18	1.86235e-17	VC_2721	nudE	ADP compounds hydrolase nudE	L, R	INFORMATION STORAGE AND PROCESSING, POORLY CHARACTERIZED	Replication, recombination and repair, General function prediction only
VC_1610	1963.85	-1.2809	0.399976	-3.20244	0.00136268	0.00283964	VC_1610	-	conserved hypothetical protein	R	POORLY CHARACTERIZED	General function prediction only
VC_0525	2587.02	-1.28502	0.101663	-12.64	1.27055e-36	3.43654e-35	VC_0525	-	putative 7,8-dihydro-6-hydroxymethylpterin-pyrophosphokinase FolK	H	METABOLISM	Coenzyme transport and metabolism
VC_2773	543.297	-1.28833	0.124169	-10.3756	3.20207e-25	4.18798e-24	VC_2773	parA	Chromosome partitioning protein parA	D	CELLULAR PROCESSES AND SIGNALING	Cell cycle control, cell division, chromosome partitioning
VC_1994	660.717	-1.28852	0.123882	-10.4012	2.4478e-25	3.23337e-24	VC_1994	sppA	protease IV (signal peptide peptidase)	O, U	CELLULAR PROCESSES AND SIGNALING, CELLULAR PROCESSES AND SIGNALING	Posttranslational modification, protein turnover, chaperones, Intracellular trafficking, secretion, and vesicular transport
VC_0952	180.035	-1.29113	0.447941	-2.88236	0.00394706	0.00767035	VC_0952	rsfS	Ribosomal silencing factor RsfS	S	POORLY CHARACTERIZED	Function unknown
VC_0210	600.727	-1.29919	0.122875	-10.5732	3.96598e-26	5.51354e-25	VC_0210	rph	ribonuclease PH	J	INFORMATION STORAGE AND PROCESSING	Translation, ribosomal structure and biogenesis
VC_A0443	241.793	-1.29984	0.173056	-7.51109	5.86376e-14	3.38871e-13	VC_A0443	blc	Outer membrane lipoprotein blc	M	CELLULAR PROCESSES AND SIGNALING	Cell wall/membrane/envelope biogenesis
VC_t037	45.4155	-1.30512	0.356477	-3.66117	0.000251069	0.000584798	VC_t037	-	-	-	-	-
VC_2614	1258.89	-1.3074	0.104956	-12.4566	1.28691e-35	3.19796e-34	VC_2614	crp	Catabolite gene activator	T	CELLULAR PROCESSES AND SIGNALING	Signal transduction mechanisms
VC_1865	326.941	-1.30783	0.164583	-7.94629	1.92178e-15	1.26297e-14	VC_1865	-	conserved hypothetical protein	E, G, P, R	METABOLISM, METABOLISM, METABOLISM, POORLY CHARACTERIZED	Amino acid transport and metabolism, Carbohydrate transport and metabolism, Inorganic ion transport and metabolism, General function prediction only
VC_2070	3702.78	-1.3085	0.137692	-9.50306	2.03819e-21	2.09944e-20	VC_2070	-	putative phosphohistidine phosphatase SixA	T	CELLULAR PROCESSES AND SIGNALING	Signal transduction mechanisms
VC_A0677	161.675	-1.31177	0.184141	-7.12372	1.05049e-12	5.55421e-12	VC_A0677	-	putative Periplasmic nitrate reductase component NapD	P	METABOLISM	Inorganic ion transport and metabolism
VC_A1006	11428	-1.31325	0.117146	-11.2104	3.62453e-29	6.10641e-28	VC_A1006	ohr	Organic hydroperoxide resistance protein	O	CELLULAR PROCESSES AND SIGNALING	Posttranslational modification, protein turnover, chaperones
VC_1022	2690.85	-1.31738	0.145206	-9.07246	1.16356e-19	1.03962e-18	VC_1022	-	-	-	-	-
VC_A0758	185.354	-1.31766	0.18798	-7.00954	2.39098e-12	1.2206e-11	VC_A0758	artQ	Arginine ABC transporter permease protein ArtQ	E	METABOLISM	Amino acid transport and metabolism
VC_1045	751.625	-1.31963	0.126924	-10.397	2.559e-25	3.36906e-24	VC_1045	-	putative RNA polymerase sigma-70 factor	K	INFORMATION STORAGE AND PROCESSING	Transcription
VC_1557	2944.44	-1.32401	0.369662	-3.58167	0.000341408	0.000779688	VC_1557	-	putative Transcriptional regulator, LacI family	K	INFORMATION STORAGE AND PROCESSING	Transcription
VC_0015	1823.38	-1.32745	0.103051	-12.8815	5.7244e-38	1.75079e-36	VC_0015	gyrB	DNA gyrase subunit B	L	INFORMATION STORAGE AND PROCESSING	Replication, recombination and repair
VC_A1049	198.859	-1.32901	0.173657	-7.65306	1.96247e-14	1.17512e-13	VC_A1049	-	Putative Metallo-beta-lactamase superfamily protein PA0057	R	POORLY CHARACTERIZED	General function prediction only
VC_1660	37.6974	-1.32951	0.38081	-3.49128	0.000480707	0.00108044	VC_1660	-	putative ABC-type multidrug transport system, permease component	V	CELLULAR PROCESSES AND SIGNALING	Defense mechanisms
VC_1414	502.372	-1.33005	0.12688	-10.4828	1.03654e-25	1.39704e-24	VC_1414	mcar	Metallocarboxypeptidase	E	METABOLISM	Amino acid transport and metabolism
VC_0948	165.38	-1.33408	0.235185	-5.67246	1.40762e-08	5.34034e-08	VC_0948	-	putative Rare lipoprotein A precursor	M	CELLULAR PROCESSES AND SIGNALING	Cell wall/membrane/envelope biogenesis
VC_0455	1090.29	-1.33448	0.10379	-12.8575	7.8045e-38	2.33313e-36	VC_0455	-	Putative oxygen-independent coproporphyrinogen III oxidase HemN	H	METABOLISM	Coenzyme transport and metabolism
VC_1164	90998	-1.33511	0.129455	-10.3134	6.13253e-25	7.89093e-24	VC_1164	cmoA	tRNA (cmo5U34)-methyltransferase	Q, R	METABOLISM, POORLY CHARACTERIZED	Secondary metabolites biosynthesis, transport and catabolism, General function prediction only
VC_2459	799.766	-1.33763	0.15192	-8.80482	1.31062e-18	1.09937e-17	VC_2459	recO	DNA repair protein recO	L	INFORMATION STORAGE AND PROCESSING	Replication, recombination and repair
VC_0143	372.588	-1.34009	0.150216	-8.92111	4.61631e-19	3.9557e-18	VC_0143	-	-	-	-	-
VC_1812	245.32	-1.34534	0.184081	-7.30843	2.70287e-13	1.48229e-12	VC_1812	-	putative Cell division inhibitor or thiol-disulfide oxidoreductase	S	POORLY CHARACTERIZED	Function unknown
VC_0062	3983.7	-1.34623	0.114457	-11.7619	6.13314e-32	1.2132e-30	VC_0062	-	putative Thiamine-phosphate pyrophosphorylase	H	METABOLISM	Coenzyme transport and metabolism
VC_0685	798.698	-1.3505	0.131061	-10.3044	6.73099e-25	8.63304e-24	VC_0685	ispH	4-hydroxy-3-methylbut-2-enyl diphosphate reductase	I, M	METABOLISM, CELLULAR PROCESSES AND SIGNALING	Lipid transport and metabolism, Cell wall/membrane/envelope biogenesis
VC_1245	5207.51	-1.35289	0.106993	-12.6446	1.19763e-36	3.26148e-35	VC_1245	-	putative Vitamin B12 import ATP-binding protein BtuD	P	METABOLISM	Inorganic ion transport and metabolism
VC_t073	97.506	-1.35527	0.222922	-6.07957	1.20504e-09	4.98049e-09	VC_t073	-	-	-	-	-
VC_2042	746.059	-1.35632	0.128967	-10.5167	7.23314e-26	9.81535e-25	VC_2042	-	putative Histone deacetylase/AcuC/AphA family protein	B, Q	INFORMATION STORAGE AND PROCESSING, METABOLISM	Chromatin structure and dynamics, Secondary metabolites biosynthesis, transport and catabolism
VC_1352	6292.05	-1.35869	0.0970531	-13.9995	1.57048e-44	6.24421e-43	VC_1352	-	-	-	-	-
VC_A0556	645.109	-1.36083	0.147919	-9.19984	3.58495e-20	3.36968e-19	VC_A0556	-	-	-	-	-
VC_1937	1387.09	-1.36658	0.123898	-11.0299	2.7425e-28	4.27615e-27	VC_1937	-	putative 1-acyl-sn-glycerol-3-phosphate acyltransferase	I	METABOLISM	Lipid transport and metabolism
VC_2337	1883.33	-1.38083	0.15309	-9.01972	1.88568e-19	1.65873e-18	VC_2337	galR	HTH-type transcriptional regulator galR (Galactose operon repressor)	K	INFORMATION STORAGE AND PROCESSING	Transcription
VC_2387	430.815	-1.38334	0.129396	-10.6908	1.12433e-26	1.60804e-25	VC_2387	-	-	-	-	-
VC_0359	196.986	-1.38507	0.195014	-7.10239	1.22617e-12	6.44875e-12	VC_0359	rpsL	30S ribosomal subunit protein S12	J	INFORMATION STORAGE AND PROCESSING	Translation, ribosomal structure and biogenesis
VC_1609	62.057	-1.38597	0.293728	-4.71856	2.37519e-06	7.11663e-06	VC_1609	-	putative ABC-type multidrug transport system, permease component	V	CELLULAR PROCESSES AND SIGNALING	Defense mechanisms
VC_1443	1543.47	-1.38723	0.368783	-3.76165	0.000168796	0.000401876	VC_1443	-	-	-	-	-
VC_0546	741.777	-1.38747	0.126881	-10.9352	7.81929e-28	1.18662e-26	VC_0546	-	-	-	-	-
VC_0886	146.03	-1.40313	0.213197	-6.58139	4.66081e-11	2.1325e-10	VC_0886	-	-	-	-	-
VC_0644	206.946	-1.40899	0.189116	-7.45039	9.30618e-14	5.29347e-13	VC_0644	rbfA	Ribosome-binding factor A	J	INFORMATION STORAGE AND PROCESSING	Translation, ribosomal structure and biogenesis
VC_1885	300.429	-1.4093	0.147369	-9.56311	1.14266e-21	1.19874e-20	VC_1885	-	-	-	-	-
VC_1967	107.324	-1.418	0.22277	-6.36529	1.94918e-10	8.44221e-10	VC_1967	-	putative methyl-accepting chemotaxis protein	N, T	CELLULAR PROCESSES AND SIGNALING, CELLULAR PROCESSES AND SIGNALING	Cell motility, Signal transduction mechanisms
VC_1175	18469.7	-1.42086	0.158418	-8.96909	2.9897e-19	2.60681e-18	VC_1175	-	-	-	-	-
VC_0449	354.692	-1.42353	0.1671	-8.519	1.60939e-17	1.24979e-16	VC_0449	-	putative methyl-accepting chemotaxis protein	N, T	CELLULAR PROCESSES AND SIGNALING, CELLULAR PROCESSES AND SIGNALING	Cell motility, Signal transduction mechanisms
VC_1739	49.2344	-1.42383	0.355296	-4.00745	6.13774e-05	0.000156034	VC_1739	-	fragment of putative Trans-2-enoyl-CoA reductase (NAD(+)) (part 1)	S	POORLY CHARACTERIZED	Function unknown
VC_A0901	4795.94	-1.42498	0.0869156	-16.395	2.07734e-60	1.44903e-58	VC_A0901	-	putative protein-disulfide isomerase	O	CELLULAR PROCESSES AND SIGNALING	Posttranslational modification, protein turnover, chaperones
VC_2726	251.072	-1.42636	0.166337	-8.5751	9.90023e-18	7.76397e-17	VC_2726	-	putative General secretion pathway protein K	U	CELLULAR PROCESSES AND SIGNALING	Intracellular trafficking, secretion, and vesicular transport
VC_0823	1920.91	-1.42953	0.111306	-12.8432	9.38631e-38	2.72408e-36	VC_0823	-	-	-	-	-
VC_1809	5946.47	-1.42966	0.149851	-9.54049	1.42165e-21	1.48359e-20	VC_1809	-	putative transcriptional regulator	K	INFORMATION STORAGE AND PROCESSING	Transcription
VC_0454	314.328	-1.43476	0.188639	-7.60585	2.83046e-14	1.67469e-13	VC_0454	glsA	Thermolabile glutaminase	E	METABOLISM	Amino acid transport and metabolism
VC_0539	728.568	-1.43699	0.147677	-9.7306	2.23274e-22	2.48666e-21	VC_0539	cysU	Sulfate transport system permease protein	O	CELLULAR PROCESSES AND SIGNALING	Posttranslational modification, protein turnover, chaperones
VC_A0571	415.463	-1.43862	0.143605	-10.018	1.27104e-23	1.4996e-22	VC_A0571	-	-	-	-	-
VC_1729	21.3223	-1.44121	0.481443	-2.99352	0.00275784	0.0054771	VC_1729	-	-	-	-	-
VC_2137	308.663	-1.44178	0.176801	-8.15482	3.49686e-16	2.45645e-15	VC_2137	flrA	Sigma 54 transcriptional activator	T	CELLULAR PROCESSES AND SIGNALING	Signal transduction mechanisms
VC_1810	430.448	-1.44313	0.169225	-8.52789	1.49037e-17	1.16191e-16	VC_1810	-	-	-	-	-
VC_A0799	20.929	-1.44635	0.462584	-3.12667	0.00176798	0.00361413	VC_A0799	-	-	-	-	-
VC_1593	1070.68	-1.45568	0.148554	-9.79902	1.13683e-22	1.3026e-21	VC_1593	-	putative GGDEF family protein	T	CELLULAR PROCESSES AND SIGNALING	Signal transduction mechanisms
VC_1145	1304.26	-1.45739	0.119877	-12.1573	5.24553e-34	1.15868e-32	VC_1145	-	putative TrkA, Potassium channel-family protein	R	POORLY CHARACTERIZED	General function prediction only
VC_1398	27.2222	-1.45781	0.471855	-3.08953	0.00200476	0.00406681	VC_1398	cheY2	Response regulator receiver	T	CELLULAR PROCESSES AND SIGNALING	Signal transduction mechanisms
VC_0842	36024.2	-1.46087	0.0860603	-16.975	1.25854e-64	9.81168e-63	VC_0842	-	putative RDD domain protein	S	POORLY CHARACTERIZED	Function unknown
VC_0405	246.223	-1.46098	0.167922	-8.70034	3.30889e-18	2.67946e-17	VC_0405	mshE	Mannose-sensitive hemagglutinin E	N, U	CELLULAR PROCESSES AND SIGNALING, CELLULAR PROCESSES AND SIGNALING	Cell motility, Intracellular trafficking, secretion, and vesicular transport
VC_t081	21.3521	-1.4617	0.456157	-3.20438	0.00135356	0.00282358	VC_t081	-	-	-	-	-
VC_0119	497.928	-1.46491	0.359657	-4.07307	4.63974e-05	0.000119094	VC_0119	-	putative uroporphyrinogen III synthase	H	METABOLISM	Coenzyme transport and metabolism
VC_0011	196.487	-1.46497	0.199915	-7.32799	2.33632e-13	1.29606e-12	VC_0011	-	-	-	-	-
VC_2298	525.16	-1.46791	0.348046	-4.21758	2.46934e-05	6.57168e-05	VC_2298	-	putative lipoprotein	M	CELLULAR PROCESSES AND SIGNALING	Cell wall/membrane/envelope biogenesis
VC_0208	17.6282	-1.46851	0.500137	-2.9362	0.00332256	0.00655282	VC_0208	-	conserved hypothetical protein	S	POORLY CHARACTERIZED	Function unknown
VC_0257	124.117	-1.47115	0.204803	-7.18323	6.80852e-13	3.63853e-12	VC_0257	-	putative transposase OrfB	L	INFORMATION STORAGE AND PROCESSING	Replication, recombination and repair
VC_A1081	7839.29	-1.47134	0.152952	-9.61962	6.60724e-22	7.02417e-21	VC_A1081	-	conserved hypothetical protein	S	POORLY CHARACTERIZED	Function unknown
VC_0351	18.3766	-1.48384	0.489311	-3.03251	0.00242531	0.00485307	VC_0351	-	conserved hypothetical protein	S	POORLY CHARACTERIZED	Function unknown
VC_2488	7952.51	-1.48624	0.162137	-9.16656	4.88371e-20	4.54745e-19	VC_2488	-	putative Membrane-associated phospholipid phosphatase	I	METABOLISM	Lipid transport and metabolism
VC_2069	1279	-1.49337	0.114188	-13.0781	4.39079e-39	1.43097e-37	VC_2069	flhA	Flagellar biosynthesis protein flhA	N, U	CELLULAR PROCESSES AND SIGNALING, CELLULAR PROCESSES AND SIGNALING	Cell motility, Intracellular trafficking, secretion, and vesicular transport
VC_2558	617.768	-1.49559	0.45084	-3.31734	0.000908805	0.00195003	VC_2558	cysC	Adenylyl-sulfate kinase	P	METABOLISM	Inorganic ion transport and metabolism
VC_2653	2579.43	-1.49649	0.138073	-10.8384	2.26501e-27	3.3856e-26	VC_2653	secB	Protein-export protein secB	U	CELLULAR PROCESSES AND SIGNALING	Intracellular trafficking, secretion, and vesicular transport
VC_2703	768.947	-1.49909	0.134033	-11.1845	4.85642e-29	8.07913e-28	VC_2703	cvrA	Cell volume regulation protein A	P	METABOLISM	Inorganic ion transport and metabolism
VC_2144	7721.09	-1.51444	0.163099	-9.2854	1.61108e-20	1.56617e-19	VC_2144	flaF	Polar flagellin F	N	CELLULAR PROCESSES AND SIGNALING	Cell motility
VC_A0859	180.957	-1.51805	0.194931	-7.78761	6.829e-15	4.26249e-14	VC_A0859	-	putative Oxidoreductase, aldo/keto reductase 2 family	R	POORLY CHARACTERIZED	General function prediction only
VC_2162	917.816	-1.52092	0.124937	-12.1735	4.30237e-34	9.61023e-33	VC_2162	-	Putative permease PerM	R	POORLY CHARACTERIZED	General function prediction only
VC_0346	100.304	-1.52404	0.23271	-6.54908	5.78942e-11	2.62771e-10	VC_0346	miaA	tRNA dimethylallyltransferase	J	INFORMATION STORAGE AND PROCESSING	Translation, ribosomal structure and biogenesis
VC_A0703	1512.37	-1.52534	0.153077	-9.96451	2.17945e-23	2.54867e-22	VC_A0703	-	conserved hypothetical protein	S	POORLY CHARACTERIZED	Function unknown
VC_1037	8667.76	-1.53179	0.154074	-9.94187	2.7364e-23	3.17199e-22	VC_1037	mrp	Protein mrp	D	CELLULAR PROCESSES AND SIGNALING	Cell cycle control, cell division, chromosome partitioning
VC_0024	2133.09	-1.53191	0.0889847	-17.2154	2.0359e-66	1.68641e-64	VC_0024	tusA	Sulfurtransferase tusA homolog	O	CELLULAR PROCESSES AND SIGNALING	Posttranslational modification, protein turnover, chaperones
VC_1310	3269.9	-1.54683	0.129257	-11.9671	5.28376e-33	1.09991e-31	VC_1310	-	-	-	-	-
VC_1450	38.832	-1.555	0.339824	-4.5759	4.74178e-06	1.37315e-05	VC_1450	rtxC	Cytolysin-activating lysine-acyltransferase rtxC	O	CELLULAR PROCESSES AND SIGNALING	Posttranslational modification, protein turnover, chaperones
VC_0517	1043.2	-1.55905	0.126658	-12.3091	8.09297e-35	1.8928e-33	VC_0517	rpoD	RNA polymerase sigma factor rpoD	K	INFORMATION STORAGE AND PROCESSING	Transcription
VC_0728	1108.1	-1.56785	0.18431	-8.50663	1.79063e-17	1.38243e-16	VC_0728	pvds	pyoverdine gene transcriptional regulator PvdS	S	POORLY CHARACTERIZED	Function unknown
VC_A0094	7619.42	-1.57151	0.117756	-13.3455	1.25873e-40	4.54975e-39	VC_A0094	-	putative transcriptional regulator	K	INFORMATION STORAGE AND PROCESSING	Transcription
VC_0701	366.268	-1.57995	0.146558	-10.7804	4.26011e-27	6.29672e-26	VC_0701	trpR	Trp operon repressor	K	INFORMATION STORAGE AND PROCESSING	Transcription
VC_0695	12234.5	-1.58333	0.140099	-11.3015	1.2894e-29	2.26842e-28	VC_0695	aroF	Phospho-2-dehydro-3-deoxyheptonate aldolase, Tyr-sensitive	E	METABOLISM	Amino acid transport and metabolism
VC_0289	227.662	-1.58471	0.19571	-8.0972	5.62385e-16	3.85525e-15	VC_0289	gntR	HTH-type transcriptional regulator gntR (Gluconate utilization system GNT-I transcriptional repressor)	K	INFORMATION STORAGE AND PROCESSING	Transcription
VC_A0577	5139.91	-1.58493	0.127079	-12.472	1.06155e-35	2.68835e-34	VC_A0577	-	-	-	-	-
VC_0808	5456.88	-1.58863	0.0984569	-16.1353	1.44066e-58	9.3903e-57	VC_0808	-	-	-	-	-
VC_A0871	12391.3	-1.60276	0.142485	-11.2486	2.35306e-29	4.05011e-28	VC_A0871	-	putative Transcriptional regulator, GntR family protein	E, K	METABOLISM, INFORMATION STORAGE AND PROCESSING	Amino acid transport and metabolism, Transcription
VC_A0471	11132.5	-1.60819	0.139232	-11.5504	7.34613e-31	1.38428e-29	VC_A0471	-	-	-	-	-
VC_0415	12209.8	-1.61036	0.145628	-11.0581	2.00403e-28	3.16265e-27	VC_0415	mreB	Rod shape-determining protein mreB	D	CELLULAR PROCESSES AND SIGNALING	Cell cycle control, cell division, chromosome partitioning
VC_2711	12137.6	-1.61682	0.144627	-11.1792	5.15261e-29	8.50074e-28	VC_2711	recG	ATP-dependent DNA helicase recG	K, L	INFORMATION STORAGE AND PROCESSING, INFORMATION STORAGE AND PROCESSING	Transcription, Replication, recombination and repair
VC_1650	1214.57	-1.62996	0.147899	-11.0208	3.03325e-28	4.69269e-27	VC_1650	-	-	-	-	-
VC_0211	299.576	-1.63274	0.160315	-10.1846	2.32397e-24	2.89658e-23	VC_0211	pyrE	orotate phosphoribosyltransferase	F	METABOLISM	Nucleotide transport and metabolism
VC_1353	6313.48	-1.63545	0.181229	-9.02425	1.80938e-19	1.59515e-18	VC_1353	-	putative periplasmic ligand-binding sensor domain fused with GGDEF family protein	T	CELLULAR PROCESSES AND SIGNALING	Signal transduction mechanisms
VC_1306	165.423	-1.63554	0.184955	-8.84294	9.32321e-19	7.87029e-18	VC_1306	-	conserved hypothetical protein	R	POORLY CHARACTERIZED	General function prediction only
VC_t084	149.649	-1.63819	0.28114	-5.82696	5.64465e-09	2.20897e-08	VC_t084	-	-	-	-	-
VC_A0867	117.144	-1.64402	0.216529	-7.59261	3.13517e-14	1.844e-13	VC_A0867	ompW	Outer membrane protein W	M	CELLULAR PROCESSES AND SIGNALING	Cell wall/membrane/envelope biogenesis
VC_1107	101.046	-1.65162	0.22159	-7.45351	9.08885e-14	5.17726e-13	VC_1107	-	putative lipoprotein carrier protein LolA	M	CELLULAR PROCESSES AND SIGNALING	Cell wall/membrane/envelope biogenesis
[truncated: 91 more rows]

## Sheet: 37S vs 37R
Comparison 37S vs 37R colonies (significant differentially expressed genes)
locus	baseMean	log2FoldChange	lfcSE	stat	pvalue	padj	locus	Symbol	GeneName	Class	ClassName	Description
VC_0932	293.928	3.85584	0.185553	20.7802	6.53187e-96	1.58398e-93	VC_0932	-	conserved hypothetical protein	O	CELLULAR PROCESSES AND SIGNALING	Posttranslational modification, protein turnover, chaperones
VC_0933	354.521	3.792	0.161458	23.4859	5.67837e-122	2.00292e-119	VC_0933	-	-	-	-	-
VC_0935	1296.16	3.72421	0.115412	32.269	1.90566e-228	1.4788e-225	VC_0935	-	putative Capsular polysaccharide synthesis enzyme CpsB	S	POORLY CHARACTERIZED	Function unknown
VC_0931	101.283	3.61523	0.267313	13.5243	1.12344e-41	6.70609e-40	VC_0931	-	putative Lipid A core - O-antigen ligase and related enzyme	M	CELLULAR PROCESSES AND SIGNALING	Cell wall/membrane/envelope biogenesis
VC_1888	4908.82	3.59737	0.0951771	37.7966	0	0	VC_1888	vah3	Hemolysin	Q	METABOLISM	Secondary metabolites biosynthesis, transport and catabolism
VC_0928	4027.03	3.55235	0.0869718	40.8448	0	0	VC_0928	-	-	-	-	-
VC_0936	372.761	3.48402	0.156884	22.2076	2.90062e-109	8.65723e-107	VC_0936	-	putative Capsular polysaccharide synthesis enzyme CpsC, polysaccharide export	M	CELLULAR PROCESSES AND SIGNALING	Cell wall/membrane/envelope biogenesis
VC_0934	1262.94	3.36709	0.101743	33.094	3.62001e-240	3.51141e-237	VC_0934	-	putative Capsular polysaccharide synthesis enzyme CpsA, sugar transferase	M	CELLULAR PROCESSES AND SIGNALING	Cell wall/membrane/envelope biogenesis
VC_0937	1109.9	3.23695	0.11238	28.8035	1.93783e-182	1.25313e-179	VC_0937	-	putative Capsular polysaccharide synthesis enzyme CpsD, exopolysaccharide synthesis	D, M	CELLULAR PROCESSES AND SIGNALING, CELLULAR PROCESSES AND SIGNALING	Cell cycle control, cell division, chromosome partitioning, Cell wall/membrane/envelope biogenesis
VC_1819	1185.64	2.79224	0.136454	20.4628	4.61719e-93	1.05381e-90	VC_1819	aldA	Aldehyde dehydrogenase	C	METABOLISM	Energy production and conversion
VC_0938	241.605	2.72845	0.159796	17.0746	2.29241e-65	2.61604e-63	VC_0938	-	conserved hypothetical protein	R	POORLY CHARACTERIZED	General function prediction only
VC_0089	373.415	2.65129	0.139782	18.9673	3.17864e-80	5.1388e-78	VC_0089	ccp	Cytochrome c551 peroxidase	P	METABOLISM	Inorganic ion transport and metabolism
VC_0918	1406.66	2.58665	0.0992397	26.0647	9.17609e-150	4.4504e-147	VC_0918	wecC	UDP-N-acetyl-D-mannosamine dehydrogenase	M	CELLULAR PROCESSES AND SIGNALING	Cell wall/membrane/envelope biogenesis
VC_0930	4060.33	2.51332	0.0960421	26.1689	6.00208e-151	3.32687e-148	VC_0930	-	putative Hemolysin-related protein RbmC	S	POORLY CHARACTERIZED	Function unknown
VC_0920	349.919	2.49139	0.135139	18.4358	6.7843e-76	9.07693e-74	VC_0920	-	putative Exopolysaccharide biosynthesis protein EpsF	M	CELLULAR PROCESSES AND SIGNALING	Cell wall/membrane/envelope biogenesis
VC_0919	482.261	2.43263	0.119227	20.4034	1.55924e-92	3.36103e-90	VC_0919	-	putative Trimeric LpxA-like enzyme	E	METABOLISM	Amino acid transport and metabolism
VC_0917	848.536	2.39784	0.102589	23.3733	7.98382e-121	2.58144e-118	VC_0917	wecB	UDP-N-acetylglucosamine 2-epimerase	M	CELLULAR PROCESSES AND SIGNALING	Cell wall/membrane/envelope biogenesis
VC_A0883	726.356	2.2766	0.120741	18.8553	2.65912e-79	3.82125e-77	VC_A0883	-	conserved hypothetical protein	N, T	CELLULAR PROCESSES AND SIGNALING, CELLULAR PROCESSES AND SIGNALING	Cell motility, Signal transduction mechanisms
VC_0924	517.358	2.25755	0.11899	18.9725	2.87687e-80	4.85316e-78	VC_0924	-	putative CapK protein	H	METABOLISM	Coenzyme transport and metabolism
VC_0927	198.47	2.15247	0.162112	13.2776	3.12096e-40	1.75497e-38	VC_0927	-	putative N-acetylglucosaminyldiphosphoundecaprenol/N-acetyl-beta-D- mannosaminyltransferase	M	CELLULAR PROCESSES AND SIGNALING	Cell wall/membrane/envelope biogenesis
VC_0926	322.384	2.15167	0.135627	15.8646	1.11492e-56	1.02997e-54	VC_0926	-	-	-	-	-
VC_0916	523.228	2.08916	0.125242	16.681	1.80326e-62	1.94351e-60	VC_0916	-	Putative low molecular weight protein-tyrosine-phosphatase	T	CELLULAR PROCESSES AND SIGNALING	Signal transduction mechanisms
VC_0922	164.521	2.01079	0.166162	12.1014	1.03818e-33	4.33992e-32	VC_0922	-	-	-	-	-
VC_0925	359.397	1.99235	0.13173	15.1245	1.11625e-51	9.21497e-50	VC_0925	-	putative Glycosyltransferase	M	CELLULAR PROCESSES AND SIGNALING	Cell wall/membrane/envelope biogenesis
VC_0923	202.383	1.97516	0.160851	12.2795	1.16762e-34	5.20731e-33	VC_0923	sat	Serine acetyltransferase	E	METABOLISM	Amino acid transport and metabolism
VC_0921	136.298	1.93595	0.180161	10.7456	6.21254e-27	2.00872e-25	VC_0921	-	putative Membrane protein involved in the export of O-antigen and teichoic acid	R	POORLY CHARACTERIZED	General function prediction only
VC_A0979	16.7811	1.91817	0.470249	4.07906	4.52183e-05	0.000170502	VC_A0979	-	Methyl-accepting chemotaxis protein (fragment)	N, T	CELLULAR PROCESSES AND SIGNALING, CELLULAR PROCESSES AND SIGNALING	Cell motility, Signal transduction mechanisms
VC_A0881	54.1951	1.88216	0.270306	6.9631	3.32876e-12	3.56785e-11	VC_A0881	-	-	-	-	-
VC_A0785	195.142	1.75992	0.15637	11.2548	2.19236e-29	7.73305e-28	VC_A0785	-	putative c-di-GMP synthetase with GAF and EAL domains	T	CELLULAR PROCESSES AND SIGNALING	Signal transduction mechanisms
VC_A0882	93.7678	1.72672	0.219652	7.86117	3.80569e-15	5.38908e-14	VC_A0882	-	conserved hypothetical protein	N, T	CELLULAR PROCESSES AND SIGNALING, CELLULAR PROCESSES AND SIGNALING	Cell motility, Signal transduction mechanisms
VC_A0645	117.549	1.64741	0.197202	8.35393	6.60277e-17	1.08096e-15	VC_A0645	-	putative Glyoxalase/Bleomycin resistance protein/Dihydroxybiphenyl dioxygenase	R	POORLY CHARACTERIZED	General function prediction only
VC_A0821	140.732	1.63531	0.179559	9.10735	8.44177e-20	1.71487e-18	VC_A0821	-	-	-	-	-
VC_A0690	41.1756	1.59191	0.29016	5.48633	4.10371e-08	2.5848e-07	VC_A0690	phbA	acetyl-CoA acetyltransferase	I	METABOLISM	Lipid transport and metabolism
VC_A0221	118.776	1.53785	0.183103	8.39883	4.50937e-17	7.47707e-16	VC_A0221	lipA	Lipase	R	POORLY CHARACTERIZED	General function prediction only
VC_0481	131.785	1.43184	0.185506	7.71861	1.1761e-14	1.60678e-13	VC_0481	argO	Arginine exporter protein argO	R	POORLY CHARACTERIZED	General function prediction only
VC_0157	1136.9	1.4061	0.111328	12.6302	1.43841e-36	6.97628e-35	VC_0157	proA	Alkaline serine exoprotease A	O	CELLULAR PROCESSES AND SIGNALING	Posttranslational modification, protein turnover, chaperones
VC_A0688	109.704	1.37903	0.189307	7.2846	3.22632e-13	3.88972e-12	VC_A0688	phaC	PHA synthase (Polyhydroxyalkanoic acid synthase)	I	METABOLISM	Lipid transport and metabolism
VC_A1113	674.223	1.37716	0.159848	8.61545	6.96694e-18	1.21219e-16	VC_A1113	-	putative ABC transporter, periplasmic spermidine putrescine-binding protein potD	E	METABOLISM	Amino acid transport and metabolism
VC_A0691	17.5473	1.36822	0.456612	2.99647	0.00273127	0.00720418	VC_A0691	phaB	acetoacetyl-CoA reductase	I, Q, R	METABOLISM, METABOLISM, POORLY CHARACTERIZED	Lipid transport and metabolism, Secondary metabolites biosynthesis, transport and catabolism, General function prediction only
VC_A0813	82.3643	1.35279	0.212377	6.36974	1.89349e-10	1.65507e-09	VC_A0813	-	Bacterial leucyl aminopeptidase	R	POORLY CHARACTERIZED	General function prediction only
VC_A0834	594.199	1.3382	0.160488	8.33833	7.53471e-17	1.22077e-15	VC_A0834	-	putative Cation efflux protein	P	METABOLISM	Inorganic ion transport and metabolism
VC_A0222	60.7101	1.31627	0.247196	5.32481	1.01058e-07	5.96811e-07	VC_A0222	-	putative Lipase activator protein, Lipase-specific foldase	O	CELLULAR PROCESSES AND SIGNALING	Posttranslational modification, protein turnover, chaperones
VC_1646	29.2217	1.30384	0.349326	3.73246	0.000189617	0.000639196	VC_1646	-	-	-	-	-
VC_A0063	809.913	1.29809	0.106681	12.1679	4.60843e-34	1.98674e-32	VC_A0063	-	putative Protease II	E	METABOLISM	Amino acid transport and metabolism
VC_A0951	358.179	1.29187	0.173842	7.43128	1.0755e-13	1.32896e-12	VC_A0951	-	conserved hypothetical protein	S	POORLY CHARACTERIZED	Function unknown
VC_0017	115.854	1.25549	0.197103	6.3697	1.89394e-10	1.65507e-09	VC_0017	-	-	-	-	-
VC_2569	66.9012	1.24169	0.23837	5.2091	1.8976e-07	1.07484e-06	VC_2569	-	-	-	-	-
VC_A0849	6039.63	1.23262	0.0956332	12.889	5.19164e-38	2.68581e-36	VC_A0849	-	putative T1SS-143 repeat domains protein	Q	METABOLISM	Secondary metabolites biosynthesis, transport and catabolism
VC_1327	403.895	1.22522	0.127948	9.57587	1.01003e-21	2.54476e-20	VC_1327	mglA	Galactose/methyl galactoside import ATP-binding protein MglA	G	METABOLISM	Carbohydrate transport and metabolism
VC_A0891	1089.61	1.22345	0.133989	9.13099	6.78756e-20	1.40084e-18	VC_A0891	-	putative iron-regulated membrane protein; Iron-uptake factor PiuB	S	POORLY CHARACTERIZED	Function unknown
VC_0034	1672.63	1.18841	0.143272	8.29478	1.08788e-16	1.72284e-15	VC_0034	dsbA	Thiol:disulfide interchange protein DsbA	C, O	METABOLISM, CELLULAR PROCESSES AND SIGNALING	Energy production and conversion, Posttranslational modification, protein turnover, chaperones
VC_A0064	566.664	1.1813	0.128805	9.17121	4.67725e-20	9.8629e-19	VC_A0064	-	putative TonB-dependent heme receptor HutR	P	METABOLISM	Inorganic ion transport and metabolism
VC_A1089	67.2972	1.17809	0.223898	5.26173	1.42707e-07	8.20304e-07	VC_A1089	cheB	fragment of Chemotaxis response regulator protein-glutamate methylesterase of group 1 operon (part 2)	N, T	CELLULAR PROCESSES AND SIGNALING, CELLULAR PROCESSES AND SIGNALING	Cell motility, Signal transduction mechanisms
VC_A0687	1860.82	1.17429	0.125558	9.35257	8.55433e-21	1.94098e-19	VC_A0687	fbpC	Fe(3+) ions import ATP-binding protein FbpC	E	METABOLISM	Amino acid transport and metabolism
VC_1031	207.143	1.17179	0.153475	7.63506	2.25714e-14	2.95868e-13	VC_1031	-	putative Cystathionine-beta-synthase	R	POORLY CHARACTERIZED	General function prediction only
VC_1523	1837.09	1.14045	0.0922475	12.3629	4.14923e-35	1.91655e-33	VC_1523	tupA	Extracellular tungstate binding protein	H	METABOLISM	Coenzyme transport and metabolism
VC_A0034	226.266	1.13681	0.142317	7.98792	1.37237e-15	2.02464e-14	VC_A0034	-	putative signal transduction protein	T	CELLULAR PROCESSES AND SIGNALING	Signal transduction mechanisms
VC_1325	2236.28	1.12711	0.126618	8.90164	5.50251e-19	1.02643e-17	VC_1325	mglB	D-galactose-binding periplasmic protein	G	METABOLISM	Carbohydrate transport and metabolism
VC_1548	978.718	1.10984	0.120832	9.18498	4.11596e-20	8.77468e-19	VC_1548	-	putative ATPase	D	CELLULAR PROCESSES AND SIGNALING	Cell cycle control, cell division, chromosome partitioning
VC_A0884	115.201	1.09037	0.207099	5.26498	1.40208e-07	8.09532e-07	VC_A0884	-	conserved hypothetical protein	M, N, T	CELLULAR PROCESSES AND SIGNALING, CELLULAR PROCESSES AND SIGNALING, CELLULAR PROCESSES AND SIGNALING	Cell wall/membrane/envelope biogenesis, Cell motility, Signal transduction mechanisms
VC_1248	1026.85	1.08056	0.0907433	11.9079	1.07698e-32	4.30792e-31	VC_1248	-	putative Methyl-accepting chemotaxis protein	N, T	CELLULAR PROCESSES AND SIGNALING, CELLULAR PROCESSES AND SIGNALING	Cell motility, Signal transduction mechanisms
VC_0284	3401.34	1.07501	0.118017	9.10898	8.31581e-20	1.69818e-18	VC_0284	-	-	P	METABOLISM	Inorganic ion transport and metabolism
VC_1622	1144.91	1.0648	0.0906684	11.7439	7.59334e-32	2.91705e-30	VC_1622	-	putative OmpA/MotB protein	M	CELLULAR PROCESSES AND SIGNALING	Cell wall/membrane/envelope biogenesis
VC_1584	75.3403	1.03482	0.212622	4.86694	1.13337e-06	5.70361e-06	VC_1584	-	putative Ankyrin protein	R	POORLY CHARACTERIZED	General function prediction only
VC_A0576	46074.7	1.03113	0.148806	6.92939	4.22664e-12	4.4807e-11	VC_A0576	hutA	Heme receptor	P	METABOLISM	Inorganic ion transport and metabolism
VC_1113	203.086	1.02938	0.146547	7.02421	2.15283e-12	2.36628e-11	VC_1113	bioF	8-amino-7-oxononanoate synthase	H	METABOLISM	Coenzyme transport and metabolism
VC_A0683	224.053	1.02887	0.136766	7.52285	5.35952e-14	6.88574e-13	VC_A0683	-	putative Sensor histidine protein kinase UhpB, glucose-6-phosphate specific	T	CELLULAR PROCESSES AND SIGNALING	Signal transduction mechanisms
VC_1524	638.5	1.02657	0.104189	9.85303	6.65062e-23	1.8301e-21	VC_1524	-	putative ABC-type tungstate transport system, permease protein	H	METABOLISM	Coenzyme transport and metabolism
VC_A0915	617.516	1.01572	0.105797	9.60065	7.94405e-22	2.01457e-20	VC_A0915	hmuV	Hemin import ATP-binding protein hmuV	P	METABOLISM	Inorganic ion transport and metabolism
VC_0475	9508.24	1.00856	0.124877	8.07647	6.66682e-16	1.01044e-14	VC_0475	irgA	Iron-regulated outer membrane virulence protein	P	METABOLISM	Inorganic ion transport and metabolism
VC_2765	12068.7	1.00281	0.104317	9.61315	7.03615e-22	1.79607e-20	VC_2765	atpG	ATP synthase gamma chain	C	METABOLISM	Energy production and conversion
VC_A1090	85.2378	0.997067	0.200804	4.96537	6.857e-07	3.58077e-06	VC_A1090	-	putative chemoreceptor glutamine deamidase CheD	N, T	CELLULAR PROCESSES AND SIGNALING, CELLULAR PROCESSES AND SIGNALING	Cell motility, Signal transduction mechanisms
VC_0954	270.099	0.995053	0.127539	7.80192	6.09723e-15	8.44902e-14	VC_0954	-	putative LPS-assembly lipoprotein RlpB precursor (Rare lipoprotein B)	M	CELLULAR PROCESSES AND SIGNALING	Cell wall/membrane/envelope biogenesis
VC_A0981	110.48	0.992119	0.181649	5.46174	4.71499e-08	2.92523e-07	VC_A0981	-	putative ABC-type amino acid transport/signal transduction systems, periplasmic component/domain	E, T	METABOLISM, CELLULAR PROCESSES AND SIGNALING	Amino acid transport and metabolism, Signal transduction mechanisms
VC_A0987	3892.98	0.987768	0.132549	7.4521	9.18692e-14	1.14248e-12	VC_A0987	ppsA	phosphoenolpyruvate synthase	G	METABOLISM	Carbohydrate transport and metabolism
VC_A0980	49.7365	0.972748	0.255626	3.80535	0.000141604	0.000485355	VC_A0980	-	-	-	-	-
VC_1525	402.883	0.971767	0.129593	7.49863	6.44872e-14	8.09742e-13	VC_1525	-	putative ABC-type tungstate transport system, ATP-binding protein	P	METABOLISM	Inorganic ion transport and metabolism
VC_1265	2219.72	0.971042	0.116466	8.33758	7.58264e-17	1.22077e-15	VC_1265	-	putative thiol oxidoreductase	C	METABOLISM	Energy production and conversion
VC_A0820	361.825	0.966845	0.175374	5.51305	3.52664e-08	2.24686e-07	VC_A0820	groL	60 kDa chaperonin	O	CELLULAR PROCESSES AND SIGNALING	Posttranslational modification, protein turnover, chaperones
VC_A0175	505.038	0.966729	0.120336	8.03358	9.46701e-16	1.41822e-14	VC_A0175	-	putative MoxR-like ATPase	R	POORLY CHARACTERIZED	General function prediction only
VC_A0689	63.0228	0.963611	0.230746	4.17608	2.96578e-05	0.00011565	VC_A0689	-	-	-	-	-
VC_1518	434.363	0.962269	0.109289	8.80481	1.31071e-18	2.35443e-17	VC_1518	-	-	-	-	-
VC_A0612	610.061	0.959889	0.129214	7.42868	1.09685e-13	1.35104e-12	VC_A0612	mscL	Large-conductance mechanosensitive channel	M	CELLULAR PROCESSES AND SIGNALING	Cell wall/membrane/envelope biogenesis
VC_2664	10228.2	0.959284	0.11505	8.33794	7.55941e-17	1.22077e-15	VC_2664	groL	60 kDa chaperonin	O	CELLULAR PROCESSES AND SIGNALING	Posttranslational modification, protein turnover, chaperones
VC_1111	185.042	0.956531	0.197705	4.83816	1.31046e-06	6.54221e-06	VC_1111	bioA	Adenosylmethionine-8-amino-7-oxononanoate aminotransferase	H	METABOLISM	Coenzyme transport and metabolism
VC_A0636	127.764	0.956321	0.178987	5.34297	9.14366e-08	5.45806e-07	VC_A0636	-	putative Antibiotic biosynthesis monooxygenase	S	POORLY CHARACTERIZED	Function unknown
VC_1314	663.716	0.952317	0.0995271	9.56841	1.08559e-21	2.70007e-20	VC_1314	-	putative Sodium/sulphate symporter	P	METABOLISM	Inorganic ion transport and metabolism
VC_A0686	2365.41	0.951416	0.124248	7.65739	1.89743e-14	2.52124e-13	VC_A0686	fbpB	Ferric transport system permease protein fbpB	P	METABOLISM	Inorganic ion transport and metabolism
VC_1996	212.097	0.95058	0.161118	5.89991	3.63692e-09	2.64751e-08	VC_1996	-	conserved hypothetical protein	S	POORLY CHARACTERIZED	Function unknown
VC_2350	1167.92	0.948533	0.0919871	10.3116	6.24604e-25	1.87865e-23	VC_2350	deoC	Deoxyribose-phosphate aldolase	F	METABOLISM	Nucleotide transport and metabolism
VC_A1004	504.649	0.946939	0.119282	7.93863	2.04425e-15	2.98184e-14	VC_A1004	-	putative FUMARYLACETOACETATE HYDROLASE/2-keto-4-pentenoate hydratase	Q	METABOLISM	Secondary metabolites biosynthesis, transport and catabolism
VC_0070	303.271	0.942538	0.124482	7.57166	3.68486e-14	4.76575e-13	VC_0070	-	-	-	-	-
VC_1264	6397.43	0.941364	0.14245	6.60837	3.88564e-11	3.69517e-10	VC_1264	-	putative Peptidase-M75	P	METABOLISM	Inorganic ion transport and metabolism
VC_A0088	1044.98	0.937866	0.105452	8.89375	5.90829e-19	1.09163e-17	VC_A0088	-	putative Na+/H+-dicarboxylate symporter	C	METABOLISM	Energy production and conversion
VC_2767	8431.97	0.936594	0.102152	9.16864	4.79044e-20	1.0047e-18	VC_2767	atpH	ATP synthase subunit delta	C	METABOLISM	Energy production and conversion
VC_1543	1635.43	0.933504	0.103611	9.00968	2.06659e-19	4.00918e-18	VC_1543	-	putative TPR domain protein	R	POORLY CHARACTERIZED	General function prediction only
VC_A0738	710.294	0.929295	0.10047	9.24943	2.25691e-20	4.97545e-19	VC_A0738	-	-	-	-	-
VC_1544	861.785	0.928062	0.0972728	9.54082	1.41707e-21	3.47991e-20	VC_1544	tonB	Ferric siderophore transport system binding protein TonB	M	CELLULAR PROCESSES AND SIGNALING	Cell wall/membrane/envelope biogenesis
VC_0704	176.586	0.926455	0.15129	6.12371	9.14215e-10	7.34401e-09	VC_0704	nspS	Norspermidine sensor	E	METABOLISM	Amino acid transport and metabolism
VC_1565	272.332	0.91787	0.12974	7.07471	1.4976e-12	1.67939e-11	VC_1565	-	putative Type I secretion outer membrane protein, TolC precursor	M, U	CELLULAR PROCESSES AND SIGNALING, CELLULAR PROCESSES AND SIGNALING	Cell wall/membrane/envelope biogenesis, Intracellular trafficking, secretion, and vesicular transport
VC_1216	343.965	0.914751	0.117396	7.79199	6.59637e-15	9.07586e-14	VC_1216	-	putative Hemerythrin fused with GGDEF family protein	P, T	METABOLISM, CELLULAR PROCESSES AND SIGNALING	Inorganic ion transport and metabolism, Signal transduction mechanisms
VC_A0065	418.071	0.908751	0.160714	5.65448	1.56321e-08	1.05483e-07	VC_A0065	-	putative Peptidase M36 fused with Proprotein convertase P-domain	O	CELLULAR PROCESSES AND SIGNALING	Posttranslational modification, protein turnover, chaperones
VC_A1092	352.728	0.906275	0.126427	7.16837	7.58985e-13	8.81695e-12	VC_A1092	-	putative Methyl-accepting chemotaxis protein III (mcp-III) (ribose and galactose chemoreceptor protein)	N, T	CELLULAR PROCESSES AND SIGNALING, CELLULAR PROCESSES AND SIGNALING	Cell motility, Signal transduction mechanisms
VC_2763	10905.4	0.905666	0.102451	8.83998	9.57366e-19	1.73578e-17	VC_2763	atpC	ATP synthase epsilon chain	C	METABOLISM	Energy production and conversion
VC_A0227	3896.04	0.904758	0.143487	6.30552	2.87234e-10	2.44401e-09	VC_A0227	-	putative ABC-type transport system, periplasmic component	P	METABOLISM	Inorganic ion transport and metabolism
VC_1112	465.699	0.899555	0.132041	6.81267	9.5804e-12	9.78209e-11	VC_1112	bioB	biotin synthase	H	METABOLISM	Coenzyme transport and metabolism
VC_A1091	130.537	0.897291	0.165763	5.41311	6.19403e-08	3.77875e-07	VC_A1091	-	putative Chemotaxis protein methyltransferase CheR	N, T	CELLULAR PROCESSES AND SIGNALING, CELLULAR PROCESSES AND SIGNALING	Cell motility, Signal transduction mechanisms
VC_A0901	142.459	0.894672	0.166486	5.37385	7.70744e-08	4.65083e-07	VC_A0901	-	putative protein-disulfide isomerase	O	CELLULAR PROCESSES AND SIGNALING	Posttranslational modification, protein turnover, chaperones
VC_0779	372.295	0.89466	0.125902	7.10598	1.19471e-12	1.35938e-11	VC_0779	fepC	Ferric enterobactin transport ATP-binding protein FepC	H, P	METABOLISM, METABOLISM	Coenzyme transport and metabolism, Inorganic ion transport and metabolism
VC_0283	56.552	0.894102	0.245214	3.64621	0.000266134	0.000867002	VC_0283	-	conserved hypothetical protein	S	POORLY CHARACTERIZED	Function unknown
VC_A1022	67.2853	0.893023	0.243631	3.66546	0.00024689	0.000812496	VC_A1022	-	-	-	-	-
VC_0824	1866.09	0.885728	0.0964949	9.17902	4.35031e-20	9.22362e-19	VC_0824	tpx	Thiol peroxidase	O	CELLULAR PROCESSES AND SIGNALING	Posttranslational modification, protein turnover, chaperones
VC_2648	230.6	0.88432	0.141569	6.24656	4.19596e-10	3.52388e-09	VC_2648	-	-	-	-	-
VC_A0952	948.657	0.880526	0.0977961	9.00369	2.18251e-19	4.21301e-18	VC_A0952	vpsT	LuxR family transcriptional regulator VpsT	K, T	INFORMATION STORAGE AND PROCESSING, CELLULAR PROCESSES AND SIGNALING	Transcription, Signal transduction mechanisms
VC_1328	247.014	0.877832	0.138979	6.31628	2.67931e-10	2.30504e-09	VC_1328	mglC	Galactoside transport system permease protein mglC	G	METABOLISM	Carbohydrate transport and metabolism
VC_1585	524.206	0.876307	0.12202	7.18168	6.88616e-13	8.07199e-12	VC_1585	katB	Catalase	P	METABOLISM	Inorganic ion transport and metabolism
VC_1566	164.805	0.874914	0.15396	5.68273	1.32559e-08	9.0233e-08	VC_1566	-	putative ABC-type antimicrobial peptide transport system, permease component	V	CELLULAR PROCESSES AND SIGNALING	Defense mechanisms
VC_1547	2275.13	0.87412	0.129992	6.72444	1.76274e-11	1.7537e-10	VC_1547	tolR	Stability protein, TolR	D, N, T, U	CELLULAR PROCESSES AND SIGNALING, CELLULAR PROCESSES AND SIGNALING, CELLULAR PROCESSES AND SIGNALING, CELLULAR PROCESSES AND SIGNALING	Cell cycle control, cell division, chromosome partitioning, Cell motility, Signal transduction mechanisms, Intracellular trafficking, secretion, and vesicular transport
VC_2665	796.796	0.865487	0.121692	7.11211	1.14282e-12	1.30801e-11	VC_2665	groS	10 kDa chaperonin	O	CELLULAR PROCESSES AND SIGNALING	Posttranslational modification, protein turnover, chaperones
VC_A0524	58.9805	0.862426	0.240463	3.58653	0.00033511	0.00106576	VC_A0524	-	putative Tellurite resistance protein and related permease	P	METABOLISM	Inorganic ion transport and metabolism
VC_A0935	793.677	0.860678	0.0970691	8.86665	7.53806e-19	1.37961e-17	VC_A0935	-	-	-	-	-
VC_2764	29736.9	0.855445	0.104643	8.17492	2.9606e-16	4.54037e-15	VC_2764	atpD	ATP synthase subunit beta	C	METABOLISM	Energy production and conversion
VC_1456	175.321	0.851099	0.172372	4.93759	7.90947e-07	4.07553e-06	VC_1456	-	-	-	-	-
VC_1583	120.726	0.847497	0.196017	4.32359	1.5351e-05	6.24995e-05	VC_1583	sodC	Superoxide dismutase [Cu-Zn]	P	METABOLISM	Inorganic ion transport and metabolism
VC_1621	2511.71	0.843426	0.0844145	9.99149	1.66065e-23	4.63547e-22	VC_1621	-	putative Type I secretion outer membrane protein, TolC	M, U	CELLULAR PROCESSES AND SIGNALING, CELLULAR PROCESSES AND SIGNALING	Cell wall/membrane/envelope biogenesis, Intracellular trafficking, secretion, and vesicular transport
VC_A1070	268.172	0.841772	0.129891	6.4806	9.1359e-11	8.37998e-10	VC_A1070	-	conserved hypothetical protein	J	INFORMATION STORAGE AND PROCESSING	Translation, ribosomal structure and biogenesis
VC_A0914	1356.72	0.841753	0.0909212	9.25806	2.08184e-20	4.61574e-19	VC_A0914	hmuU	Hemin transport system permease protein hmuU	P	METABOLISM	Inorganic ion transport and metabolism
VC_A0109	360.772	0.839588	0.156445	5.36667	8.02052e-08	4.82475e-07	VC_A0109	-	conserved hypothetical protein	S	POORLY CHARACTERIZED	Function unknown
VC_A0523	2636.76	0.834241	0.122655	6.80152	1.03521e-11	1.046e-10	VC_A0523	cqsA	CAI-1 autoinducer synthase	H	METABOLISM	Coenzyme transport and metabolism
VC_1949	69.5973	0.832626	0.234888	3.54477	0.00039295	0.00123653	VC_1949	-	putative Pyoverdine biosynthesis protein PvcA	Q	METABOLISM	Secondary metabolites biosynthesis, transport and catabolism
VC_2766	31059.6	0.830702	0.112527	7.38222	1.55669e-13	1.88749e-12	VC_2766	atpA	ATP synthase subunit alpha	C	METABOLISM	Energy production and conversion
VC_A0031	173.618	0.829301	0.15176	5.46454	4.64099e-08	2.89037e-07	VC_A0031	-	putative Methyl-accepting chemotaxis protein	N, T	CELLULAR PROCESSES AND SIGNALING, CELLULAR PROCESSES AND SIGNALING	Cell motility, Signal transduction mechanisms
VC_A0714	81.8986	0.829106	0.213534	3.88278	0.00010327	0.00036098	VC_A0714	dgkA	Diacylglycerol kinase	M	CELLULAR PROCESSES AND SIGNALING	Cell wall/membrane/envelope biogenesis
VC_1315	668.696	0.82836	0.106721	7.7619	8.36661e-15	1.14708e-13	VC_1315	-	putative Sensor histidine kinase	T	CELLULAR PROCESSES AND SIGNALING	Signal transduction mechanisms
VC_A0440	60.169	0.828255	0.2355	3.51701	0.000436442	0.00136125	VC_A0440	-	-	-	-	-
VC_1545	404.598	0.822848	0.130382	6.31107	2.77115e-10	2.3683e-09	VC_1545	exbD	Biopolymer transport protein exbD2	U	CELLULAR PROCESSES AND SIGNALING	Intracellular trafficking, secretion, and vesicular transport
VC_A0174	446.868	0.822679	0.128513	6.40154	1.53817e-10	1.36258e-09	VC_A0174	-	conserved hypothetical protein	R	POORLY CHARACTERIZED	General function prediction only
VC_0780	109.291	0.817049	0.194087	4.20971	2.557e-05	0.00010062	VC_0780	vibD	Vibriobactin synthase component D	Q	METABOLISM	Secondary metabolites biosynthesis, transport and catabolism
VC_A0441	145.009	0.816414	0.183805	4.44175	8.92322e-06	3.79212e-05	VC_A0441	-	-	-	-	-
VC_2768	8236.44	0.813902	0.103203	7.8864	3.11031e-15	4.45314e-14	VC_2768	atpF	ATP synthase subunit b	C	METABOLISM	Energy production and conversion
VC_1209	2048.7	0.807678	0.0949823	8.50346	1.8402e-17	3.13157e-16	VC_1209	-	putative translation elongation factor P-like protein	J	INFORMATION STORAGE AND PROCESSING	Translation, ribosomal structure and biogenesis
VC_0766	734.683	0.803582	0.0975765	8.23541	1.78943e-16	2.79959e-15	VC_0766	xseA	Exodeoxyribonuclease 7 large subunit	L	INFORMATION STORAGE AND PROCESSING	Replication, recombination and repair
VC_2512	2089.77	0.803293	0.100093	8.02545	1.01155e-15	1.50954e-14	VC_2512	-	Putative translation initiation inhibitor, yjgF family (Endoribonuclease L-PSP)	J	INFORMATION STORAGE AND PROCESSING	Translation, ribosomal structure and biogenesis
VC_1546	880.648	0.803152	0.117766	6.81987	9.11247e-12	9.37835e-11	VC_1546	exbB2	Biopolymer transport protein ExbB2	U	CELLULAR PROCESSES AND SIGNALING	Intracellular trafficking, secretion, and vesicular transport
VC_1208	1594.76	0.800501	0.106745	7.49918	6.42167e-14	8.08964e-13	VC_1208	-	conserved hypothetical protein	S	POORLY CHARACTERIZED	Function unknown
VC_0947	2494.7	0.796663	0.0862972	9.23162	2.6656e-20	5.84325e-19	VC_0947	dacA	D-alanyl-D-alanine carboxypeptidase dacA	M	CELLULAR PROCESSES AND SIGNALING	Cell wall/membrane/envelope biogenesis
VC_0651	147.72	0.794012	0.171622	4.62652	3.71859e-06	1.70344e-05	VC_0651	-	putative Peptidase U32	O	CELLULAR PROCESSES AND SIGNALING	Posttranslational modification, protein turnover, chaperones
VC_0773	1533.4	0.792073	0.134077	5.90761	3.47101e-09	2.54104e-08	VC_0773	vibC	Vibriobactin-specific isochorismate synthase	H, Q	METABOLISM, METABOLISM	Coenzyme transport and metabolism, Secondary metabolites biosynthesis, transport and catabolism
VC_1905	5732.38	0.786636	0.127522	6.16861	6.88916e-10	5.65115e-09	VC_1905	ald	alanine dehydrogenase	E	METABOLISM	Amino acid transport and metabolism
VC_A0988	56.829	0.786092	0.238334	3.29828	0.000972788	0.00282094	VC_A0988	-	putative Aerotaxis sensor receptor protein	N, T	CELLULAR PROCESSES AND SIGNALING, CELLULAR PROCESSES AND SIGNALING	Cell motility, Signal transduction mechanisms
VC_A0867	6283.07	0.785288	0.111413	7.04841	1.80973e-12	2.01196e-11	VC_A0867	ompW	Outer membrane protein W	M	CELLULAR PROCESSES AND SIGNALING	Cell wall/membrane/envelope biogenesis
VC_1050	606.097	0.783738	0.12233	6.40673	1.48675e-10	1.32004e-09	VC_1050	-	putative Response regulator	T	CELLULAR PROCESSES AND SIGNALING	Signal transduction mechanisms
VC_2171	772.832	0.783726	0.150405	5.21078	1.88043e-07	1.06668e-06	VC_2171	pyrP	Uracil permease	F	METABOLISM	Nucleotide transport and metabolism
VC_1457	239.577	0.781697	0.138638	5.63841	1.71625e-08	1.15608e-07	VC_1457	-	-	-	-	-
VC_A0751	622.169	0.778762	0.116712	6.67253	2.51425e-11	2.45108e-10	VC_A0751	fabHA	3-oxoacyl-[acyl-carrier-protein] synthase 3 protein 1	I	METABOLISM	Lipid transport and metabolism
VC_0520	2493.08	0.777597	0.102026	7.62152	2.50698e-14	3.27512e-13	VC_0520	rpsU	30S ribosomal subunit protein S21	J	INFORMATION STORAGE AND PROCESSING	Translation, ribosomal structure and biogenesis
VC_A0843	7524.44	0.775599	0.135772	5.7125	1.11329e-08	7.72732e-08	VC_A0843	-	putative glyceraldehyde-3-phosphate dehydrogenase	G	METABOLISM	Carbohydrate transport and metabolism
VC_2352	5741.91	0.775401	0.0828059	9.36408	7.67161e-21	1.75093e-19	VC_2352	nupX	Nucleoside permease nupX	F	METABOLISM	Nucleotide transport and metabolism
VC_2183	3045.64	0.775056	0.090845	8.53163	1.44303e-17	2.47742e-16	VC_2183	prs	Ribose-phosphate pyrophosphokinase	E, F	METABOLISM, METABOLISM	Amino acid transport and metabolism, Nucleotide transport and metabolism
VC_A1093	89.9905	0.774546	0.193921	3.99412	6.49348e-05	0.000238037	VC_A1093	-	putative Positive regulator of CheA protein activity (CheW)	N, T	CELLULAR PROCESSES AND SIGNALING, CELLULAR PROCESSES AND SIGNALING	Cell motility, Signal transduction mechanisms
VC_A0096	1621.53	0.773685	0.147282	5.25308	1.4958e-07	8.58535e-07	VC_A0096	-	putative Zinc-dependent metalloprotease fused with Proprotein convertase P-domain	O	CELLULAR PROCESSES AND SIGNALING	Posttranslational modification, protein turnover, chaperones
VC_A0048	225.276	0.773533	0.16192	4.77725	1.77709e-06	8.68403e-06	VC_A0048	-	-	-	-	-
VC_A0913	2314.39	0.770747	0.100338	7.68153	1.57199e-14	2.10321e-13	VC_A0913	-	TonB system transport protein ExbD1	P	METABOLISM	Inorganic ion transport and metabolism
VC_0703	269.866	0.76719	0.148915	5.15186	2.57915e-07	1.4378e-06	VC_0703	mbaA	Biofilm architecture maintenance protein mbaA	T	CELLULAR PROCESSES AND SIGNALING	Signal transduction mechanisms
VC_1526	326.507	0.766765	0.134276	5.71035	1.12745e-08	7.79771e-08	VC_1526	mobA	Molybdopterin-guanine dinucleotide biosynthesis protein A	H	METABOLISM	Coenzyme transport and metabolism
VC_A1088	80.5346	0.762409	0.221444	3.4429	0.000575507	0.00175135	VC_A1088	-	putative Methyl-accepting chemotaxis protein	N, T	CELLULAR PROCESSES AND SIGNALING, CELLULAR PROCESSES AND SIGNALING	Cell motility, Signal transduction mechanisms
VC_1960	582.576	0.760435	0.10948	6.94586	3.76149e-12	4.0095e-11	VC_1960	minD	Septum site-determining protein minD	D	CELLULAR PROCESSES AND SIGNALING	Cell cycle control, cell division, chromosome partitioning
VC_2762	1055.56	0.759551	0.105863	7.17485	7.23884e-13	8.45985e-12	VC_2762	glmU	Bifunctional protein glmU [Includes: UDP-N-acetylglucosamine pyrophosphorylase ; Glucosamine-1-phosphate N-acetyltransferase]	M	CELLULAR PROCESSES AND SIGNALING	Cell wall/membrane/envelope biogenesis
VC_A0699	191.28	0.752555	0.152668	4.92936	8.24983e-07	4.24527e-06	VC_A0699	glgC	Glucose-1-phosphate adenylyltransferase	G	METABOLISM	Carbohydrate transport and metabolism
VC_0939	89.1478	0.751956	0.201874	3.72488	0.000195407	0.000657	VC_0939	-	-	-	-	-
VC_1563	255.035	0.747877	0.136896	5.46311	4.67876e-08	2.90923e-07	VC_1563	-	putative Secretion protein HlyD	M	CELLULAR PROCESSES AND SIGNALING	Cell wall/membrane/envelope biogenesis
VC_A0037	1004.1	0.74705	0.125619	5.94693	2.73223e-09	2.04259e-08	VC_A0037	-	putative Copper metallochaperone, bacterial analog of Cox17 protein	S	POORLY CHARACTERIZED	Function unknown
VC_A0032	168.023	0.745199	0.160835	4.6333	3.59874e-06	1.6544e-05	VC_A0032	-	-	-	-	-
VC_1267	1419.81	0.744396	0.0946577	7.86409	3.71792e-15	5.28407e-14	VC_1267	-	conserved hypothetical protein	S	POORLY CHARACTERIZED	Function unknown
VC_0772	2487.18	0.743833	0.110567	6.72745	1.72657e-11	1.72213e-10	VC_0772	vibE	Vibriobactin-specific 2,3-dihydroxybenzoate-AMP ligase	Q	METABOLISM	Secondary metabolites biosynthesis, transport and catabolism
VC_A0624	3673.67	0.742504	0.0993023	7.4772	7.59203e-14	9.50229e-13	VC_A0624	tktA	transketolase 1	G	METABOLISM	Carbohydrate transport and metabolism
VC_A0627	51.9995	0.742248	0.243497	3.04829	0.00230149	0.00617979	VC_A0627	-	putative rRNA methylase	J	INFORMATION STORAGE AND PROCESSING	Translation, ribosomal structure and biogenesis
VC_1168	2200.46	0.740346	0.116034	6.38042	1.76602e-10	1.55731e-09	VC_1168	-	putative proton/glutamate symporter	C	METABOLISM	Energy production and conversion
VC_0395	2095.89	0.73755	0.0888111	8.30471	1.00061e-16	1.60429e-15	VC_0395	gtaB	UTP--glucose-1-phosphate uridylyltransferase	M	CELLULAR PROCESSES AND SIGNALING	Cell wall/membrane/envelope biogenesis
VC_0207	208.377	0.737122	0.145422	5.06885	4.00225e-07	2.17185e-06	VC_0207	murP	PTS system N-acetylmuramic acid-specific EIIBC component [Includes: N-acetylmuramic acid-specific phosphotransferase enzyme IIB component ; N-acetylmuramic acid permease IIC component]	G	METABOLISM	Carbohydrate transport and metabolism
VC_A0637	586.271	0.734364	0.112367	6.53543	6.34264e-11	5.91573e-10	VC_A0637	nfnB	Oxygen-insensitive NAD(P)H nitroreductase	C	METABOLISM	Energy production and conversion
VC_2347	1138.77	0.73277	0.088327	8.29611	1.07572e-16	1.71058e-15	VC_2347	deoD	Purine nucleoside phosphorylase deoD-type	F	METABOLISM	Nucleotide transport and metabolism
VC_1517	848.122	0.731814	0.097475	7.50771	6.01703e-14	7.62944e-13	VC_1517	-	-	-	-	-
VC_A0107	754.062	0.731235	0.123938	5.90001	3.63475e-09	2.64751e-08	VC_A0107	-	conserved hypothetical protein	S	POORLY CHARACTERIZED	Function unknown
VC_1606	479.597	0.729938	0.112455	6.49091	8.53172e-11	7.84433e-10	VC_1606	-	putative protein TolC, efflux pump component	M, U	CELLULAR PROCESSES AND SIGNALING, CELLULAR PROCESSES AND SIGNALING	Cell wall/membrane/envelope biogenesis, Intracellular trafficking, secretion, and vesicular transport
VC_1959	306.345	0.729643	0.12156	6.00233	1.94503e-09	1.4944e-08	VC_1959	minC	Septum site-determining protein minC	D	CELLULAR PROCESSES AND SIGNALING	Cell cycle control, cell division, chromosome partitioning
VC_A0658	1403.36	0.728934	0.114377	6.37309	1.85257e-10	1.62993e-09	VC_A0658	-	putative Methyl-accepting chemotaxis protein with PAS domain	N, T	CELLULAR PROCESSES AND SIGNALING, CELLULAR PROCESSES AND SIGNALING	Cell motility, Signal transduction mechanisms
VC_1937	55.1013	0.725676	0.243284	2.98284	0.00285587	0.00748702	VC_1937	-	putative 1-acyl-sn-glycerol-3-phosphate acyltransferase	I	METABOLISM	Lipid transport and metabolism
VC_1573	3897.11	0.725317	0.114303	6.34554	2.21647e-10	1.92823e-09	VC_1573	fumC	Fumarate hydratase class II 1	C	METABOLISM	Energy production and conversion
VC_A0983	480.515	0.723275	0.125778	5.7504	8.9034e-09	6.23559e-08	VC_A0983	-	putative L-lactate permease	C	METABOLISM	Energy production and conversion
VC_2349	720.987	0.721569	0.104159	6.92754	4.28219e-12	4.52722e-11	VC_2349	deoA	Thymidine phosphorylase	F	METABOLISM	Nucleotide transport and metabolism
VC_2462	611.81	0.720867	0.108008	6.67422	2.48548e-11	2.42914e-10	VC_2462	lepB	Signal peptidase I	U	CELLULAR PROCESSES AND SIGNALING	Intracellular trafficking, secretion, and vesicular transport
VC_1708	118.837	0.718513	0.174167	4.12542	3.70051e-05	0.00014244	VC_1708	-	putative Permease of the major facilitator superfamily	E, G, P, R	METABOLISM, METABOLISM, METABOLISM, POORLY CHARACTERIZED	Amino acid transport and metabolism, Carbohydrate transport and metabolism, Inorganic ion transport and metabolism, General function prediction only
VC_1106	159.786	0.718403	0.160762	4.46873	7.8687e-06	3.39606e-05	VC_1106	-	putative metal-binding protein related to the C-terminal domain of SecA	R, U	POORLY CHARACTERIZED, CELLULAR PROCESSES AND SIGNALING	General function prediction only, Intracellular trafficking, secretion, and vesicular transport
VC_0950	628.86	0.716924	0.0984174	7.28452	3.22807e-13	3.88972e-12	VC_0950	mrdA	Penicillin-binding protein 2	M	CELLULAR PROCESSES AND SIGNALING	Cell wall/membrane/envelope biogenesis
VC_1519	517.689	0.716091	0.104304	6.86542	6.62971e-12	6.91485e-11	VC_1519	-	putative Formate dehydrogenase, subunit FdhD	C	METABOLISM	Energy production and conversion
VC_A0912	1302.4	0.716053	0.0931411	7.68783	1.4965e-14	2.00914e-13	VC_A0912	exbD1	Biopolymer transport protein exbD1	U	CELLULAR PROCESSES AND SIGNALING	Intracellular trafficking, secretion, and vesicular transport
VC_A0224	119.149	0.714097	0.175141	4.07727	4.55677e-05	0.000171487	VC_A0224	-	-	-	-	-
VC_A0170	135.47	0.713427	0.181924	3.92157	8.79734e-05	0.00031258	VC_A0170	-	-	-	-	-
VC_1608	205.646	0.711274	0.147837	4.81119	1.50035e-06	7.42957e-06	VC_1608	-	putative ABC-type multidrug transport system, permease component	V	CELLULAR PROCESSES AND SIGNALING	Defense mechanisms
VC_1854	5981	0.710848	0.100388	7.08102	1.43097e-12	1.60932e-11	VC_1854	ompT	Outer membrane porin-like protein OmpT	M	CELLULAR PROCESSES AND SIGNALING	Cell wall/membrane/envelope biogenesis
VC_1266	1570.74	0.71028	0.0997028	7.12397	1.0486e-12	1.21088e-11	VC_1266	-	putative Iron-regulated protein A precursor	R	POORLY CHARACTERIZED	General function prediction only
VC_1645	371.68	0.70964	0.120435	5.8923	3.8086e-09	2.76213e-08	VC_1645	-	putative Haloacid dehalogenase-like hydrolase	R	POORLY CHARACTERIZED	General function prediction only
VC_0940	70.426	0.708744	0.21852	3.24339	0.00118116	0.00336238	VC_0940	-	conserved hypothetical protein	S	POORLY CHARACTERIZED	Function unknown
VC_A1021	317.585	0.707385	0.142301	4.97106	6.65878e-07	3.48665e-06	VC_A1021	-	conserved hypothetical protein	S	POORLY CHARACTERIZED	Function unknown
VC_0184	150.96	0.70726	0.164409	4.30184	1.69389e-05	6.85327e-05	VC_0184	-	-	-	-	-
VC_A0895	287.628	0.705055	0.15152	4.65322	3.2679e-06	1.51487e-05	VC_A0895	-	putative c-di-GMP phosphodiesterase class II with HAMP domain	N, T	CELLULAR PROCESSES AND SIGNALING, CELLULAR PROCESSES AND SIGNALING	Cell motility, Signal transduction mechanisms
VC_0875	1940.99	0.704844	0.112206	6.28172	3.34849e-10	2.84292e-09	VC_0875	proS	prolyl-tRNA synthetase	J	INFORMATION STORAGE AND PROCESSING	Translation, ribosomal structure and biogenesis
VC_2214	1537.56	0.704221	0.1012	6.95869	3.43439e-12	3.67092e-11	VC_2214	gltX	Glutamyl-tRNA synthetase	J	INFORMATION STORAGE AND PROCESSING	Translation, ribosomal structure and biogenesis
VC_A0243	69.6437	0.70365	0.216186	3.25484	0.00113456	0.00324876	VC_A0243	-	putative pyridoxal phosphate (PLP) phosphatase	R	POORLY CHARACTERIZED	General function prediction only
VC_2209	10010.2	0.69885	0.091508	7.63704	2.2228e-14	2.92355e-13	VC_2209	-	Non-ribosomal peptide synthetase modules siderophore biosynthesis (fragment)	Q	METABOLISM	Secondary metabolites biosynthesis, transport and catabolism
VC_2211	25988.1	0.697149	0.157282	4.43248	9.31553e-06	3.95451e-05	VC_2211	viuA	Vibriobactin receptor	P	METABOLISM	Inorganic ion transport and metabolism
VC_A0026	1881.63	0.696783	0.099691	6.98943	2.76e-12	2.98791e-11	VC_A0026	-	conserved hypothetical protein	S	POORLY CHARACTERIZED	Function unknown
VC_A0911	1950.24	0.695676	0.0842041	8.26178	1.43512e-16	2.26352e-15	VC_A0911	exbB	Biopolymer transport protein exbB1	U	CELLULAR PROCESSES AND SIGNALING	Intracellular trafficking, secretion, and vesicular transport
VC_A0567	415.869	0.695301	0.113173	6.1437	8.06219e-10	6.51694e-09	VC_A0567	-	-	-	-	-
VC_1672	85.0197	0.695067	0.202053	3.44002	0.000581665	0.00176593	VC_1672	tag	3-methyladenine DNA glycosylase 1	L	INFORMATION STORAGE AND PROCESSING	Replication, recombination and repair
VC_0778	493.748	0.694014	0.120387	5.76486	8.17271e-09	5.74459e-08	VC_0778	viuG	Ferric vibriobactin ABC transporter, permease protein	P	METABOLISM	Inorganic ion transport and metabolism
VC_A0277	2831.84	0.693509	0.087034	7.96825	1.60933e-15	2.36522e-14	VC_A0277	gcvH	Glycine cleavage system H protein	E	METABOLISM	Amino acid transport and metabolism
VC_1300	1191.29	0.693004	0.103901	6.66987	2.56027e-11	2.48968e-10	VC_1300	sdaA	L-serine dehydratase 1	E	METABOLISM	Amino acid transport and metabolism
VC_2258	976.498	0.690242	0.107984	6.39206	1.63668e-10	1.44654e-09	VC_2258	pyrH	uridylate kinase	F	METABOLISM	Nucleotide transport and metabolism
VC_1527	1008.57	0.689976	0.0932286	7.4009	1.35264e-13	1.65039e-12	VC_1527	-	putative Bifunctional molybdenum cofactor biosynthesis MobB/MoeA	H	METABOLISM	Coenzyme transport and metabolism
VC_0004	3455.32	0.689371	0.102615	6.71801	1.84218e-11	1.82338e-10	VC_0004	oxaA	Inner membrane protein oxaA	U	CELLULAR PROCESSES AND SIGNALING	Intracellular trafficking, secretion, and vesicular transport
VC_0069	2267.8	0.687281	0.0890838	7.71499	1.20992e-14	1.64143e-13	VC_0069	-	putative FLORFENICOL EXPORTER	E, G, P, R	METABOLISM, METABOLISM, METABOLISM, POORLY CHARACTERIZED	Amino acid transport and metabolism, Carbohydrate transport and metabolism, Inorganic ion transport and metabolism, General function prediction only
VC_2498	125.572	0.685397	0.178968	3.82972	0.000128289	0.000442849	VC_2498	-	conserved hypothetical protein	S	POORLY CHARACTERIZED	Function unknown
VC_1936	125.336	0.685279	0.173783	3.94331	8.03652e-05	0.000289255	VC_1936	-	putative Phosphatidate cytidylyltransferase	R	POORLY CHARACTERIZED	General function prediction only
VC_A0652	367.634	0.684674	0.123649	5.53723	3.07298e-08	1.97077e-07	VC_A0652	-	-	-	-	-
VC_0905	1242.62	0.684143	0.102616	6.66702	2.61051e-11	2.53219e-10	VC_0905	metQ	D-methionine-binding lipoprotein metQ	P	METABOLISM	Inorganic ion transport and metabolism
VC_1577	339.651	0.682552	0.124788	5.46968	4.50836e-08	2.82136e-07	VC_1577	-	putative Bacterial lipid A biosynthesis acyltransferase	M	CELLULAR PROCESSES AND SIGNALING	Cell wall/membrane/envelope biogenesis
VC_A1015	186.045	0.679475	0.149756	4.53722	5.70008e-06	2.53337e-05	VC_A1015	-	Putative Na+/H+ antiporter NhaD type -	P	METABOLISM	Inorganic ion transport and metabolism
VC_2293	4453.14	0.6794	0.0750119	9.05722	1.33818e-19	2.64905e-18	VC_2293	nqrC	Na(+)-translocating NADH-quinone reductase subunit C	C	METABOLISM	Energy production and conversion
VC_1938	464.637	0.677255	0.120615	5.61501	1.9655e-08	1.30809e-07	VC_1938	-	putative thioesterase	R	POORLY CHARACTERIZED	General function prediction only
VC_2014	154.481	0.676114	0.165365	4.08861	4.33963e-05	0.000164271	VC_2014	-	putative Deoxyribonuclease, TatD Mg-dependent	L	INFORMATION STORAGE AND PROCESSING	Replication, recombination and repair
VC_1360	186.399	0.675969	0.153807	4.3949	1.10822e-05	4.64349e-05	VC_1360	aapM	General L-amino acid transport system permease protein aapM	E	METABOLISM	Amino acid transport and metabolism
VC_1039	1827.49	0.675703	0.0909866	7.4264	1.11596e-13	1.37023e-12	VC_1039	-	putative AsmA protein	M	CELLULAR PROCESSES AND SIGNALING	Cell wall/membrane/envelope biogenesis
VC_1916	518.652	0.675018	0.109296	6.17605	6.57248e-10	5.42579e-09	VC_1916	cmk	cytidylate kinase	F	METABOLISM	Nucleotide transport and metabolism
VC_2348	902.2	0.67311	0.0949599	7.08836	1.35715e-12	1.53969e-11	VC_2348	deoB	phosphopentomutase	G	METABOLISM	Carbohydrate transport and metabolism
VC_0775	113.145	0.672354	0.19005	3.53777	0.000403525	0.00126776	VC_0775	vibH	Amide synthase	Q	METABOLISM	Secondary metabolites biosynthesis, transport and catabolism
VC_2004	515.642	0.669967	0.141276	4.74226	2.1135e-06	1.01616e-05	VC_2004	-	putative iron-regulated protein	S	POORLY CHARACTERIZED	Function unknown
VC_A0682	134.777	0.668055	0.164105	4.07091	4.68306e-05	0.000175898	VC_A0682	uhpA	Transcriptional regulatory protein uhpA	K, T	INFORMATION STORAGE AND PROCESSING, CELLULAR PROCESSES AND SIGNALING	Transcription, Signal transduction mechanisms
VC_A0218	1076.98	0.667654	0.0947724	7.04481	1.85711e-12	2.0542e-11	VC_A0218	-	Thermolabile hemolysin Thermolabile hemolysin - Complete proteome; Cytolysis; Direct protein sequencing; Hemolysis; Hydrolase; Lipid degradation; Secreted; Signal; Toxin	I, R	METABOLISM, POORLY CHARACTERIZED	Lipid transport and metabolism, General function prediction only
VC_2747	100.23	0.666676	0.192792	3.45801	0.000544176	0.00166778	VC_2747	-	-	-	-	-
VC_A0011	973.418	0.664142	0.0944029	7.03519	1.98987e-12	2.19338e-11	VC_A0011	malT	HTH-type transcriptional regulator malT	K	INFORMATION STORAGE AND PROCESSING	Transcription
VC_A0269	108.701	0.663562	0.191947	3.45701	0.000546214	0.0016727	VC_A0269	-	putative Glutamate decarboxylase	E	METABOLISM	Amino acid transport and metabolism
VC_1129	164.018	0.662116	0.165329	4.00484	6.20587e-05	0.000228451	VC_1129	gsk	Inosine-guanosine kinase	G	METABOLISM	Carbohydrate transport and metabolism
VC_1692	89.6835	0.659459	0.191407	3.44532	0.000570383	0.00173712	VC_1692	torA	Trimethylamine-N-oxide reductase precursor (TMAO reductase) (Trimethylamine oxidase)	C	METABOLISM	Energy production and conversion
VC_1126	1372.46	0.658435	0.0975194	6.75184	1.45983e-11	1.46739e-10	VC_1126	purB	Adenylosuccinate lyase	F	METABOLISM	Nucleotide transport and metabolism
VC_A1054	235.107	0.65796	0.132678	4.95907	7.08313e-07	3.69389e-06	VC_A1054	-	Putative NADH-flavin reductase	R	POORLY CHARACTERIZED	General function prediction only
VC_A0095	268.142	0.657786	0.145115	4.53287	5.81873e-06	2.57656e-05	VC_A0095	-	conserved hypothetical protein	C	METABOLISM	Energy production and conversion
VC_A0900	279.563	0.657475	0.127918	5.13982	2.75004e-07	1.52649e-06	VC_A0900	-	putative Zn-dependent hydrolase, including glyoxylase	R	POORLY CHARACTERIZED	General function prediction only
VC_A0663	427.72	0.657164	0.12412	5.29458	1.1929e-07	6.93919e-07	VC_A0663	-	putative Methyl-accepting chemotaxis protein	N, T	CELLULAR PROCESSES AND SIGNALING, CELLULAR PROCESSES AND SIGNALING	Cell motility, Signal transduction mechanisms
[truncated: 1,267 more rows]

## Sheet: 22S vs 22Sb
Comparison 22S vs 22Sb colonies (significant differentially expressed genes)
[truncated: 1,018 more rows]

## Sheet: 22S vs 37S
Comparison 22S vs 37S colonies (significant differentially expressed genes)
[truncated: 1,189 more rows]

[truncated: 3 more sheets: 22S vs 37R, 37S vs 22Sb, table all ]
