# Supplementary material for: BipA exerts temperature-dependent translational control of biofilm-associated colony morphology in Vibrio cholerae
Source: eLife. 2021 Feb 16;10:e60607. doi: 10.7554/eLife.60607 (PMC7886329; doi:10.7554/eLife.60607)
Supplement: Supplementary file 4. [file elife-60607-supp4.xlsx]

## Sheet: Biofilm related genes
Biofilm-related genes differentially expressed in mRNA-seq analysis
Biofilm-related genes: genes that have been described to be related or have influence on biofilm
Biofilm matrix production
vpsI cluster
GeneID	22Sbv37R	37Sv37R	22Sv37S	22Sv22Sb	22Sv37R	37Sv22Sb	Class	Description	GENEID	Symbol	GeneName
VC0916	7.79655	4.255	2.40214		10.4601	0.555438	CELLULAR PROCESSES AND SIGNALING	Signal transduction mechanisms	VC0916	vpsU	Putative low molecular weight protein-tyrosine-phosphatase
VC0917	12.4114	5.27013	2.02169		10.9019	0.432431	CELLULAR PROCESSES AND SIGNALING	Cell wall/membrane/envelope biogenesis	VC0917	vpsA	UDP-N-acetylglucosamine 2-epimerase
VC0918	11.7627	6.00702	1.83621		11.2692	0.517537	CELLULAR PROCESSES AND SIGNALING	Cell wall/membrane/envelope biogenesis	VC0918	vpsB	UDP-N-acetyl-D-mannosamine dehydrogenase
VC0919	11.4914	5.39878	2.22685		12.2852	0.476332	METABOLISM	Amino acid transport and metabolism	VC0919	vpsC	putative Trimeric LpxA-like enzyme
VC0920	11.6486	5.62318	1.94997		11.1567	0.493027	CELLULAR PROCESSES AND SIGNALING	Cell wall/membrane/envelope biogenesis	VC0920	vpsD	putative Exopolysaccharide biosynthesis protein EpsF
VC0921	5.60261	3.82629	1.63023		6.38698		POORLY CHARACTERIZED	General function prediction only	VC0921	vpsE	putative Membrane protein involved in the export of O-antigen and teichoic acid
VC0922	3.46775	4.03004			4.36087				VC0922	vpsF
VC0923	6.49318	3.93172			5.73702	0.610354	METABOLISM	Amino acid transport and metabolism	VC0923	vpsG	Serine acetyltransferase
VC0924	6.1857	4.78178			5.82668		METABOLISM	Coenzyme transport and metabolism	VC0924	vpsH	putative CapK protein
VC0925	5.38076	3.97886	1.39175		5.6336		CELLULAR PROCESSES AND SIGNALING	Cell wall/membrane/envelope biogenesis	VC0925	vpsI	putative Glycosyltransferase
VC0926	5.61789	4.44341			4.97655				VC0926	vpsJ
VC0927	8.22591	4.44587	1.58727		7.21963	0.551938	CELLULAR PROCESSES AND SIGNALING	Cell wall/membrane/envelope biogenesis	VC0927	vpsK	putative N-acetylglucosaminyldiphosphoundecaprenol/N-acetyl-beta-D- mannosaminyltransferase
rmbcluster and bap1
VC0928	15.2474	11.7318			13.5972				VC0928	rbmA
VC0929	2.00508		2.20347		2.58315	0.581713			VC0929	rbmB
VC0930	10.0611	5.70932	1.76087		10.2537	0.575554	POORLY CHARACTERIZED	Function unknown	VC0930	rbmC	putative Hemolysin-related protein RbmC
VC0931	29.4918	12.2544			23.4473		CELLULAR PROCESSES AND SIGNALING	Cell wall/membrane/envelope biogenesis	VC0931	rbmD	putative Lipid A core - O-antigen ligase and related enzyme
VC0932	24.5447	14.4785			23.5797		CELLULAR PROCESSES AND SIGNALING	Posttranslational modification, protein turnover, chaperones	VC0932	rbmE	conserved hypothetical protein
VC0933	23.6703	13.8518			23.3629				VC0933	rbmF
VC1888	21.7281	12.1037	1.62959		20.0986	0.56533	METABOLISM	Secondary metabolites biosynthesis, transport and catabolism	VC1888	bap1	Hemolysin
vpsIIcluster
VC0934	12.3021	10.318			13.5702		CELLULAR PROCESSES AND SIGNALING	Cell wall/membrane/envelope biogenesis	VC0934	vpsL	putative Capsular polysaccharide synthesis enzyme CpsA, sugar transferase
VC0935	13.5903	13.216			15.2981		POORLY CHARACTERIZED	Function unknown	VC0935	vpsM	putative Capsular polysaccharide synthesis enzyme CpsB
VC0936	11.4716	11.1891			16.9618		CELLULAR PROCESSES AND SIGNALING	Cell wall/membrane/envelope biogenesis	VC0936	vpsN	putative Capsular polysaccharide synthesis enzyme CpsC, polysaccharide export
VC0937	8.42298	9.428			10.2853		CELLULAR PROCESSES AND SIGNALING	Cell wall/membrane/envelope biogenesis	VC0937	vpsO	putative Capsular polysaccharide synthesis enzyme CpsD, exopolysaccharide synthesis
VC0938	5.7488	6.62743			7.31267		POORLY CHARACTERIZED	General function prediction only	VC0938	vpsP	conserved hypothetical protein
T2SS
VC2724	1.74931	1.36577			1.6916		CELLULAR PROCESSES AND SIGNALING	Intracellular trafficking, secretion, and vesicular transport	VC2724	epsM	General secretion pathway protein M
VC2730	1.63813				1.53165	0.762012	CELLULAR PROCESSES AND SIGNALING	Intracellular trafficking, secretion, and vesicular transport	VC2730	epsG	General secretion pathway protein G
VC2731	1.33737	1.3159			1.3799		CELLULAR PROCESSES AND SIGNALING	Intracellular trafficking, secretion, and vesicular transport	VC2731	epsF	General secretion pathway protein F
VC2732	1.42495	1.36516			1.44678		CELLULAR PROCESSES AND SIGNALING	Intracellular trafficking, secretion, and vesicular transport	VC2732	epsE	General secretion pathway protein E
Regulators
VCA0952	1.23167	1.84105		1.58312	1.96083	1.51528	CELLULAR PROCESSES AND SIGNALING	Signal transduction mechanisms	VCA0952	vpsT	LuxR family transcriptional regulator VpsT
VC0665				1.27072		1.32036	CELLULAR PROCESSES AND SIGNALING	Signal transduction mechanisms	VC0665	vpsR	putative sigma-54 dependent transcriptional regulator
VC0583	1.53811		1.58219		1.59511	0.652071	INFORMATION STORAGE AND PROCESSING	Transcription	VC0583	hapR	Hemagglutinin/protease regulatory protein (part 1)
VC2647		1.46895	0.644134			1.65194	INFORMATION STORAGE AND PROCESSING	Transcription	VC2647	aphA	Transcriptional regulator PadR family
VC2677			1.23872		1.29216		INFORMATION STORAGE AND PROCESSING	Transcription	VC2677	cytR	HTH-type transcriptional repressor cytR
VC0347									VC0347	hfq
VC1130						1.34182	POORLY CHARACTERIZED	General function prediction only	VC1130	hns	DNA-binding protein H-NS
VC2614	1.33219	1.2741	0.783429				CELLULAR PROCESSES AND SIGNALING	Signal transduction mechanisms	VC2614	crp	Catabolite gene activator
VC0290	1.46709			0.630576			INFORMATION STORAGE AND PROCESSING	Replication, recombination and repair	VC0290	fis	DNA-binding protein fis
VC0548	0.812441					1.27999	CELLULAR PROCESSES AND SIGNALING	Signal transduction mechanisms	VC0548	csrA	Carbon storage regulator homolog
VC0719	0.552711	0.594878			0.671098		CELLULAR PROCESSES AND SIGNALING	Signal transduction mechanisms	VC0719	phoB	Phosphate regulon transcriptional regulatory protein phoB
VC0720	0.635589				0.696633	1.37567	CELLULAR PROCESSES AND SIGNALING	Signal transduction mechanisms	VC0720	phoR	Phosphate regulon sensor protein phoR
VCA0029	0.248714	0.39383		1.88	0.47093	1.60609	INFORMATION STORAGE AND PROCESSING	Transcription	VCA0029	oscR	putative Transcriptional regulator
VC1278	1.38177		1.90861		1.54318	0.582294	INFORMATION STORAGE AND PROCESSING	Transcription	VC1278	cosR	putative Bacterial regulatory protein, MarR family
VC1320		1.35139					CELLULAR PROCESSES AND SIGNALING	Signal transduction mechanisms	VC1320	carR, rstA	Transcriptional regulatory protein rstA
VCA1078									VCA1078	vqmA
QS systems
VC1021									VC1021	luxO
VC1022	1.29116				1.26868				VC1022	luxU
VC1445	1.65118		1.92865		1.78807	0.557961	CELLULAR PROCESSES AND SIGNALING	Signal transduction mechanisms	VC1445	vpsS	putative Signal transduction histidine kinase
VCA0736			1.32023	1.24845			CELLULAR PROCESSES AND SIGNALING	Signal transduction mechanisms	VCA0736	luxQ	Autoinducer 2 sensor kinase/phosphatase luxQ
VC0557	0.823005						CELLULAR PROCESSES AND SIGNALING	Signal transduction mechanisms	VC0557	luxS	Autoinducer-2 synthase (S-ribosylhomocysteine lyase)
VCA0522	1.52155		1.60437		1.70486	0.695307	CELLULAR PROCESSES AND SIGNALING	Signal transduction mechanisms	VCA0522	cqsS	CAI-1 autoinducer sensor kinase/phosphatase CqsS
VCA0523	3.33229	1.78292	1.70478		3.0945	0.543755	METABOLISM	Coenzyme transport and metabolism	VCA0523	cqsA	CAI-1 autoinducer synthase
VC1653									VC1653	vieS
VC1652	1.58336				1.56931	0.760358	CELLULAR PROCESSES AND SIGNALING	Signal transduction mechanisms	VC1652	vieA	Response regulator VieA
VC1651	2.03078		1.83262		2.0902	0.558238	CELLULAR PROCESSES AND SIGNALING	Signal transduction mechanisms	VC1651	vieB	Response regulator VieB
VC2453	1.41697		1.34788		1.46874	0.765359	CELLULAR PROCESSES AND SIGNALING	Signal transduction mechanisms	VC2453	varS	Signal transduction histidine-protein kinase barA
VC1213	0.563032			1.23851	0.70142	1.54026	CELLULAR PROCESSES AND SIGNALING	Signal transduction mechanisms	VC1213	varA	Response regulator uvrY
DGCs and PDEs (c-di-GMP)
DGCc
VCA0697	4.03277		4.41437		5.45125	0.303585			VCA0697	cdgD
VC1593	0.294533								VC1593	acgB	putative GGDEF family protein
VC1104									VC1104	cdgK
VCA0074					1.34172		CELLULAR PROCESSES AND SIGNALING	Signal transduction mechanisms	VCA0074	cdgA	putative Transcriptional regulator CdgA
VC1067	2.04201	1.35227	1.40939		1.94423	0.671664	CELLULAR PROCESSES AND SIGNALING	Signal transduction mechanisms	VC1067	cdgH	putative ABC-type amino acid transport/signal transduction systems, periplasmic component/domain
VC2285	0.715867						CELLULAR PROCESSES AND SIGNALING	Signal transduction mechanisms	VC2285	cdgL	putative GGDEF family protein
VC1376	0.643857	0.663757	1.33866	1.39904			CELLULAR PROCESSES AND SIGNALING	Signal transduction mechanisms	VC1376	cdgM	putative GGDEF family protein
VCA0939						1.66515	CELLULAR PROCESSES AND SIGNALING	Signal transduction mechanisms	VCA0939		putative Sensory box/GGDEF family protein
VC2454			1.45651	1.55352	1.82831		CELLULAR PROCESSES AND SIGNALING	Signal transduction mechanisms	VC2454	vpvC	putative GGDEF domain fused with Signal transduction histidine kinase
VC1372	0.607805	0.74171			0.745163		CELLULAR PROCESSES AND SIGNALING	Signal transduction mechanisms	VC1372		putative GGDEF family protein
PDEs
VCA0785	5.26634	3.3868			4.79428	0.648952	CELLULAR PROCESSES AND SIGNALING	Signal transduction mechanisms	VCA0785	cdgC	putative c-di-GMP synthetase with GAF and EAL domains
VC1592									VC1592	acgA
VC1652	1.58336				1.56931	0.760358	CELLULAR PROCESSES AND SIGNALING	Signal transduction mechanisms	VC1652	vieA	Response regulator VieA
VC0137	1.42975		1.29225		1.32459	0.712773	CELLULAR PROCESSES AND SIGNALING	Signal transduction mechanisms	VC0137	cdgJ	putative Metal-dependent phosphohydrolase (Predicted signal transduction protein)
VC0130	1.64182		1.62406		1.58174	0.590605	CELLULAR PROCESSES AND SIGNALING	Signal transduction mechanisms	VC0130	cdpA	putative EAL family protein
VC0653	0.711814	0.650894			0.787801		CELLULAR PROCESSES AND SIGNALING	Signal transduction mechanisms	VC0653	rocS	putative EAL,GGDEF and PAS domains carrying protein
VC0703	3.1273	1.70195	1.67469		2.91703	0.552614	CELLULAR PROCESSES AND SIGNALING	Signal transduction mechanisms	VC0703	mbaA	Biofilm architecture maintenance protein mbaA
VC1851	1.29187		1.50343		1.57752
c-di-GMP receptor proteins with PilZ domains
VC0697	0.66699					1.31525			VC0697	PlzA
VC1885	0.730818				0.747936				VC1885	PlzB	enhancer of motility
VC2344		0.768115	1.53322			0.67033			VC2344	PlzC	enhancer of motility
VCA0042					1.3558				VCA0042	PlzD	repressor or motility
VCA0735		0.769352							VCA0735	PlzE
small regulatory RNAs
VC1020/VC1021										Qrr1
VCA0040/VCA0041										Qrr2
VCA0040	1.70612	1.38164			1.29728	-	POORLY CHARACTERIZED	Function unknown	VCA0040		conserved hypothetical protein
VCA0826/VCA0827										Qrr3
VCA0826	0.368259	0.216078	7.3233	4.39668
VCA0827	0.347398	0.371215	2.34137	2.53441			METABOLISM	Coenzyme transport and metabolism	VCA0827	phhB	Pterin-4-alpha-carbinolamine dehydratase
VCA0958/VCA0959										Qrr4
VCA0958			1.31845				INFORMATION STORAGE AND PROCESSING	Transcription	VCA0958		putative transcriptional regulator
VC0190/VC0191									VC0190/VC0191	csrB
VC0190	0.65989	0.81418			0.67696	1.25017	INFORMATION STORAGE AND PROCESSING	Replication, recombination and repair	VC0190	uvrD	DNA helicase II
VC0882/VC0883									VC0882/VC0883	csrC
VCA0839/ VCA0840									VCA0839/ VCA0840	csrD
VCA0840	0.396534	0.516827		1.3777	0.54935	1.32086	METABOLISM	Nucleotide transport and metabolism	VCA0840		putative deoxycytidylate deaminase
VCA1078 (3'UTR)	no								VCA1078 (3'UTR)	vqmR
VC1743 (5'-UTR)			2.18769	1.61985	1.78637	0.739558	METABOLISM	Amino acid transport and metabolism		vrrA	putative 1-aminocyclopropane-1-carboxylate deaminase
VC0106/VC0107										ryhB
PTS systems-related
VC0122	0.556765	0.427655	1.87376	1.45859	0.816313		METABOLISM	Nucleotide transport and metabolism	VC0122	cyaA	adenylate cyclase
VC0207		1.66685			1.27583	1.39845	METABOLISM	Carbohydrate transport and metabolism	VC0207	murP	PTS system N-acetylmuramic acid-specific EIIBC component [Includes: N-acetylmuramic acid-specific phosphotransferase enzyme IIB component ; N-acetylmuramic acid permease IIC component]
VC0398	0.79772	0.83092					CELLULAR PROCESSES AND SIGNALING	Signal transduction mechanisms	VC0398		putative regulatory protein CsrD
VC0606				0.452204	0.431603		METABOLISM	Amino acid transport and metabolism	VC0606	glnB	Nitrogen regulatory protein P-II
VC0672	0.668395	0.806519			0.810571	1.22292	CELLULAR PROCESSES AND SIGNALING	Signal transduction mechanisms	VC0672	ptsP	Phosphoenolpyruvate-protein phosphotransferase ptsP
VC0900	0.816472						CELLULAR PROCESSES AND SIGNALING	Signal transduction mechanisms	VC0900		putative ATPase involved in DNA repair fused with GGDEF family protein
VC0910	0.75753	0.298814		0.360578	0.275048	0.399581	METABOLISM	Carbohydrate transport and metabolism	VC0910	treB	PTS system trehalose-specific EIIBC component [Includes: Trehalose-specific phosphotransferase enzyme IIB component ; Trehalose permease IIC component]
VC0964	0.647777		0.796048		0.741044	1.42978	METABOLISM	Carbohydrate transport and metabolism	VC0964	crr	Glucose-specific phosphotransferase enzyme IIA component
VC0965			0.752075	0.719896	0.689473		METABOLISM	Carbohydrate transport and metabolism	VC0965	ptsI	Phosphoenolpyruvate-protein phosphotransferase
VC0966	0.549893	0.790257	0.664246		0.534902	1.45698	METABOLISM	Carbohydrate transport and metabolism	VC0966	ptsH	Phosphocarrier protein HPr
VC0995											PTS system N-acetylglucosamine-specific transporter subunit IIABC
VC1283											EIIB/C family (fructose)
VC1291	0.698996	0.648087	1.44194	1.35542			CELLULAR PROCESSES AND SIGNALING	Signal transduction mechanisms	VC1291		putative signal-transduction protein containing cAMP-binding and CBS domains
VC1655	3.01773		1.58005		2.08843	0.435788	METABOLISM	Inorganic ion transport and metabolism	VC1655		putative Mg/Co/Ni transporter MgtE
VC1721	1.2215	1.32242	0.614078	0.674606			INFORMATION STORAGE AND PROCESSING	Transcription	VC1721	purR	HTH-type transcriptional repressor purR
VC1742		0.66589	5.41909	3.26914	3.6629	0.604199					Hypothetical protein
VC1817	0.353775	0.48979	1.50022	2.10254		1.40283	METABOLISM	Secondary metabolites biosynthesis, transport and catabolism	VC1817		putative Sigma-54 dependent transcriptional regulator
VC1820	0.171113	0.102761		0.462367	0.0803369		CELLULAR PROCESSES AND SIGNALING	Signal transduction mechanisms	VC1820		putative PTS system, fructose/mannitol specific IIA subunit
VC1821		0.165555	1.56202	0.271538	0.263748	0.174598	METABOLISM	Carbohydrate transport and metabolism	VC1821		putative PTS system, fructose-specific IIBC component frwBC
VC1822	0.531868	0.334627			0.412351	0.638299	CELLULAR PROCESSES AND SIGNALING	Signal transduction mechanisms	VC1822		putative PTS system fructose-specific IIA/IIB/IIC components
VC1823	0.444384	0.381481			0.334022		METABOLISM	Carbohydrate transport and metabolism	VC1823	frwB	Fructose-like phosphotransferase enzyme IIB component 2
VC1824	0.658388	0.360928			0.529941	0.556539	CELLULAR PROCESSES AND SIGNALING	Signal transduction mechanisms	VC1824		putative PTS system, fructose/mannitol specific IIA subunit fused with PTS-HPr like protein
VC1825	0.300426	0.300435			0.233382		INFORMATION STORAGE AND PROCESSING	Transcription	VC1825		Putative ARAC-type regulatory protein
VC1826	0.361504	0.0906272		0.288287	0.105263	0.25393	CELLULAR PROCESSES AND SIGNALING	Signal transduction mechanisms	VC1826		putative PTS system, fructose-specific IIABC component
VC1827	0.533415	0.0920137		0.295889	0.159049	0.174695	METABOLISM	Carbohydrate transport and metabolism	VC1827	manA	Mannose-6-phosphate isomerase
VC2013	2.2233	1.26589	1.26372	0.729567	1.63115	0.577785	METABOLISM	Carbohydrate transport and metabolism	VC2013	ptsG	PTS system glucose-specific EIICB component [Includes: Glucose permease IIC component ; Glucose-specific phosphotransferase enzyme IIB component]
VC2531	1.24334				1.30639		CELLULAR PROCESSES AND SIGNALING	Signal transduction mechanisms	VC2531	ptsN	Nitrogen regulatory protein [Includes: Phosphotransferase enzyme IIA component]
VC2533	1.8098				1.56952	0.667148	METABOLISM	Carbohydrate transport and metabolism	VC2533	ptsO	Phosphocarrier protein NPr
VC2689	0.623203	0.841783	0.666704		0.571923	1.36975	METABOLISM	Carbohydrate transport and metabolism	VC2689	pfkA	6-phosphofructokinase
VC2720		0.696365	1.31376			0.807211	POORLY CHARACTERIZED	Function unknown	VC2720	nfuA	Fe/S biogenesis protein nfuA
VC2738	1.2832						METABOLISM	Energy production and conversion	VC2738	pck	Phosphoenolpyruvate carboxykinase [ATP]
VCA0245	1.73732						CELLULAR PROCESSES AND SIGNALING	Signal transduction mechanisms	VCA0245	ulaC	Ascorbate-specific phosphotransferase enzyme IIA component
VCA0246											Ascorbate-specific phosphotransferase enzyme IIB/C component
VCA0516	1.80018	0.58965		0.341014		0.330264	METABOLISM	Carbohydrate transport and metabolism	VCA0516	fruA	PTS system fructose-specific EIIBC component [Includes: Fructose-specific phosphotransferase enzyme IIB component ; Fructose permease IIC component]
VCA0518		0.478177		0.287706	0.265871	0.526229	METABOLISM	Carbohydrate transport and metabolism	VCA0518		putative Fructose-specific phosphocarrier protein HPr
VCA0653	0.657903	0.412964		0.472606	0.313053		METABOLISM	Carbohydrate transport and metabolism	VCA0653	scrA	PTS system sucrose-specific EIIBC component [Includes: Sucrose-specific phosphotransferase enzyme IIB component ; Sucrose permease IIC component]
VCA0744	2.02681			0.619707		0.509162	METABOLISM	Energy production and conversion	VCA0744	glpK	Glycerol kinase
VCA0943	1.67653	0.704524	2.38474		1.71114	0.425582	METABOLISM	Carbohydrate transport and metabolism	VCA0943	malG	Maltose transport system permease protein malG
VCA1045	0.677576	0.544752	1.58432	1.29111			METABOLISM	Carbohydrate transport and metabolism	VCA1045	mtlA	PTS system mannitol-specific EIICBA component [Includes: Mannitol permease IIC component ; Mannitol-specific phosphotransferase enzyme IIB component ; Mannitol-specific phosphotransferase enzyme IIA component]
VCA1046	0.606102	0.598417	1.27109	1.27161	0.774863		METABOLISM	Carbohydrate transport and metabolism	VCA1046	mtlD	Mannitol-1-phosphate 5-dehydrogenase
Other
VC0122	0.556765	0.427655	1.87376	1.45859	0.816313		METABOLISM	Nucleotide transport and metabolism	VC0122	cyaA	adenylate cyclase
VC2451	1.40002	1.21517			1.46158		CELLULAR PROCESSES AND SIGNALING	Signal transduction mechanisms	VC2451	relA	GTP pyrophosphokinase
VC1224	0.507365	0.427743	2.10209	1.79687			POORLY CHARACTERIZED	Function unknown	VC1224	relV	conserved hypothetical protein
VC2710									VC2710	spoT
Heat- and cold-shock related genes
GeneID	22Sbv37R	37Sv37R	22Sv37S	22Sv22Sb	22Sv37R	37Sv22Sb	Class	Description	GENEID	Symbol	GeneName
VCA0184	2.87712		2.50644		2.80031	0.386292	INFORMATION STORAGE AND PROCESSING	Transcription	VCA0184	capB	Cold shock protein CapB
VCA0166	3.51894	1.41585	1.85748		2.68137	0.407867	INFORMATION STORAGE AND PROCESSING	Transcription	VCA0166	cspG	Cold shock-like protein CspG
VCA0933		1.41439	0.489953	0.559585			INFORMATION STORAGE AND PROCESSING	Transcription	VCA0933	cspG	Cold shock protein CspG
VCA0804		0.682347	0.567826	0.419136	0.395384	0.73871	INFORMATION STORAGE AND PROCESSING	Replication, recombination and repair	VCA0804	deaD	Cold-shock DEAD box protein A
VC1142		0.726791					INFORMATION STORAGE AND PROCESSING	Transcription	VC1142	cspD	Cold shock-like protein cspD
VCA0819	4.33408		3.92036		5.09795	0.297664	CELLULAR PROCESSES AND SIGNALING	Posttranslational modification, protein turnover, chaperones	VCA0819	groS	10 kDa chaperonin
VCA0820	5.75156	1.95456	3.12958		6.23727	0.344595	CELLULAR PROCESSES AND SIGNALING	Posttranslational modification, protein turnover, chaperones	VCA0820	groL	60 kDa chaperonin
VC2664	1.62764	1.94434			1.549		CELLULAR PROCESSES AND SIGNALING	Posttranslational modification, protein turnover, chaperones	VC2664	groL	60 kDa chaperonin
VC1386			0.563034		0.579367		CELLULAR PROCESSES AND SIGNALING	Posttranslational modification, protein turnover, chaperones	VC1386		Putative heat shock protein YegD
VC1117	0.524444	0.416851	2.01076	1.62007		0.806082	CELLULAR PROCESSES AND SIGNALING	Posttranslational modification, protein turnover, chaperones	VC1117	htpX	Heat shock protein htpX
VC1374	1.4432			0.699818		0.773322	CELLULAR PROCESSES AND SIGNALING	Posttranslational modification, protein turnover, chaperones	VC1374		putative Heat shock protein Hsp70
VC2735		0.719383	1.79226		1.31005	0.689995	INFORMATION STORAGE AND PROCESSING	Translation, ribosomal structure and biogenesis	VC2735	hslR	Heat shock protein 15
VC0018		0.430479	5.51225	2.02746	2.41622	0.367744	CELLULAR PROCESSES AND SIGNALING	Posttranslational modification, protein turnover, chaperones	VC0018	ibpA	Small heat shock protein ibpA
VC1663									VC1663		putative heat-shock protein

## Sheet: Biofilm related genes b
Biofilm-related genes
Biofilm-related genes b: genes that have been described to be related or have influence on biofilm, colour-coded by UP-regulation at 37C or 22C
Red= UP-regulated genes at 37ºC; Blue= UP-regulated genes at 22ºC
Biofilm matrix production
vpsI cluster
GeneID	22Sbv37R	37Sv37R	22Sv37S	22Sv22Sb	22Sv37R	37Sv22Sb	Class	Description	GENEID	Symbol	GeneName
VC0916	7.79655	4.255	2.40214		10.4601	1.80038	CELLULAR PROCESSES AND SIGNALING	Signal transduction mechanisms	VC0916	vpsU	Putative low molecular weight protein-tyrosine-phosphatase
VC0917	12.4114	5.27013	2.02169		10.9019	2.31251	CELLULAR PROCESSES AND SIGNALING	Cell wall/membrane/envelope biogenesis	VC0917	vpsA	UDP-N-acetylglucosamine 2-epimerase
VC0918	11.7627	6.00702	1.83621		11.2692	1.93223	CELLULAR PROCESSES AND SIGNALING	Cell wall/membrane/envelope biogenesis	VC0918	vpsB	UDP-N-acetyl-D-mannosamine dehydrogenase
VC0919	11.4914	5.39878	2.22685		12.2852	2.09938	METABOLISM	Amino acid transport and metabolism	VC0919	vpsC	putative Trimeric LpxA-like enzyme
VC0920	11.6486	5.62318	1.94997		11.1567	2.02829	CELLULAR PROCESSES AND SIGNALING	Cell wall/membrane/envelope biogenesis	VC0920	vpsD	putative Exopolysaccharide biosynthesis protein EpsF
VC0921	5.60261	3.82629	1.63023		6.38698		POORLY CHARACTERIZED	General function prediction only	VC0921	vpsE	putative Membrane protein involved in the export of O-antigen and teichoic acid
VC0922	3.46775	4.03004			4.36087				VC0922	vpsF
VC0923	6.49318	3.93172			5.73702	1.63839	METABOLISM	Amino acid transport and metabolism	VC0923	vpsG	Serine acetyltransferase
VC0924	6.1857	4.78178			5.82668		METABOLISM	Coenzyme transport and metabolism	VC0924	vpsH	putative CapK protein
VC0925	5.38076	3.97886	1.39175		5.6336		CELLULAR PROCESSES AND SIGNALING	Cell wall/membrane/envelope biogenesis	VC0925	vpsI	putative Glycosyltransferase
VC0926	5.61789	4.44341			4.97655				VC0926	vpsJ
VC0927	8.22591	4.44587	1.58727		7.21963	1.8118	CELLULAR PROCESSES AND SIGNALING	Cell wall/membrane/envelope biogenesis	VC0927	vpsK	putative N-acetylglucosaminyldiphosphoundecaprenol/N-acetyl-beta-D- mannosaminyltransferase
rmbcluster and bap1
VC0928	15.2474	11.7318			13.5972				VC0928	rbmA
VC0929	2.00508		2.20347		2.58315	1.71906			VC0929	rbmB
VC0930	10.0611	5.70932	1.76087		10.2537	1.73746	POORLY CHARACTERIZED	Function unknown	VC0930	rbmC	putative Hemolysin-related protein RbmC
VC0931	29.4918	12.2544			23.4473		CELLULAR PROCESSES AND SIGNALING	Cell wall/membrane/envelope biogenesis	VC0931	rbmD	putative Lipid A core - O-antigen ligase and related enzyme
VC0932	24.5447	14.4785			23.5797		CELLULAR PROCESSES AND SIGNALING	Posttranslational modification, protein turnover, chaperones	VC0932	rbmE	conserved hypothetical protein
VC0933	23.6703	13.8518			23.3629				VC0933	rbmF
VC1888	21.7281	12.1037	1.62959		20.0986	1.76888	METABOLISM	Secondary metabolites biosynthesis, transport and catabolism	VC1888	bap1	Hemolysin
vpsIIcluster
VC0934	12.3021	10.318			13.5702		CELLULAR PROCESSES AND SIGNALING	Cell wall/membrane/envelope biogenesis	VC0934	vpsL	putative Capsular polysaccharide synthesis enzyme CpsA, sugar transferase
VC0935	13.5903	13.216			15.2981		POORLY CHARACTERIZED	Function unknown	VC0935	vpsM	putative Capsular polysaccharide synthesis enzyme CpsB
VC0936	11.4716	11.1891			16.9618		CELLULAR PROCESSES AND SIGNALING	Cell wall/membrane/envelope biogenesis	VC0936	vpsN	putative Capsular polysaccharide synthesis enzyme CpsC, polysaccharide export
VC0937	8.42298	9.428			10.2853		CELLULAR PROCESSES AND SIGNALING	Cell wall/membrane/envelope biogenesis	VC0937	vpsO	putative Capsular polysaccharide synthesis enzyme CpsD, exopolysaccharide synthesis
VC0938	5.7488	6.62743			7.31267		POORLY CHARACTERIZED	General function prediction only	VC0938	vpsP	conserved hypothetical protein
T2SS
VC2724	1.74931	1.36577			1.6916		CELLULAR PROCESSES AND SIGNALING	Intracellular trafficking, secretion, and vesicular transport	VC2724	epsM	General secretion pathway protein M
VC2730	1.63813				1.53165	1.31232	CELLULAR PROCESSES AND SIGNALING	Intracellular trafficking, secretion, and vesicular transport	VC2730	epsG	General secretion pathway protein G
VC2731	1.33737	1.3159			1.3799		CELLULAR PROCESSES AND SIGNALING	Intracellular trafficking, secretion, and vesicular transport	VC2731	epsF	General secretion pathway protein F
VC2732	1.42495	1.36516			1.44678		CELLULAR PROCESSES AND SIGNALING	Intracellular trafficking, secretion, and vesicular transport	VC2732	epsE	General secretion pathway protein E
Regulators
VCA0952	1.23167	1.84105		1.58312	1.96083	1.51528	CELLULAR PROCESSES AND SIGNALING	Signal transduction mechanisms	VCA0952	vpsT	LuxR family transcriptional regulator VpsT
VC0665				1.27072		1.32036	CELLULAR PROCESSES AND SIGNALING	Signal transduction mechanisms	VC0665	vpsR	putative sigma-54 dependent transcriptional regulator
VC0583	1.53811		1.58219		1.59511	1.53357	INFORMATION STORAGE AND PROCESSING	Transcription	VC0583	hapR	Hemagglutinin/protease regulatory protein (part 1)
VC2647		1.46895	1.55247			1.65194	INFORMATION STORAGE AND PROCESSING	Transcription	VC2647	aphA	Transcriptional regulator PadR family
VC2677			1.23872		1.29216		INFORMATION STORAGE AND PROCESSING	Transcription	VC2677	cytR	HTH-type transcriptional repressor cytR
VC0347									VC0347	hfq
VC1130						1.34182	POORLY CHARACTERIZED	General function prediction only	VC1130	hns	DNA-binding protein H-NS
VC2614	1.33219	1.2741	1.27644				CELLULAR PROCESSES AND SIGNALING	Signal transduction mechanisms	VC2614	crp	Catabolite gene activator
VC0290	1.46709			1.58585			INFORMATION STORAGE AND PROCESSING	Replication, recombination and repair	VC0290	fis	DNA-binding protein fis
VC0548	1.23086					1.27999	CELLULAR PROCESSES AND SIGNALING	Signal transduction mechanisms	VC0548	csrA	Carbon storage regulator homolog
VC0719	1.80926	1.68102			1.4901		CELLULAR PROCESSES AND SIGNALING	Signal transduction mechanisms	VC0719	phoB	Phosphate regulon transcriptional regulatory protein phoB
VC0720	1.57334				1.43548	1.37567	CELLULAR PROCESSES AND SIGNALING	Signal transduction mechanisms	VC0720	phoR	Phosphate regulon sensor protein phoR
VCA0029	4.02068	2.53917		1.88	2.12346	1.60609	INFORMATION STORAGE AND PROCESSING	Transcription	VCA0029	oscR	putative Transcriptional regulator
VC1278	1.38177		1.90861		1.54318	1.71734	INFORMATION STORAGE AND PROCESSING	Transcription	VC1278	cosR	putative Bacterial regulatory protein, MarR family
VC1320		1.35139					CELLULAR PROCESSES AND SIGNALING	Signal transduction mechanisms	VC1320	carR, rstA	Transcriptional regulatory protein rstA
VCA1078									VCA1078	vqmA
QS systems
VC1021									VC1021	luxO
VC1022	1.29116				1.26868				VC1022	luxU
VC1445	1.65118		1.92865		1.78807	1.79224	CELLULAR PROCESSES AND SIGNALING	Signal transduction mechanisms	VC1445	vpsS	putative Signal transduction histidine kinase
VCA0736			1.32023	1.24845			CELLULAR PROCESSES AND SIGNALING	Signal transduction mechanisms	VCA0736	luxQ	Autoinducer 2 sensor kinase/phosphatase luxQ
VC0557	1.21506						CELLULAR PROCESSES AND SIGNALING	Signal transduction mechanisms	VC0557	luxS	Autoinducer-2 synthase (S-ribosylhomocysteine lyase)
VCA0522	1.52155		1.60437		1.70486	1.43821	CELLULAR PROCESSES AND SIGNALING	Signal transduction mechanisms	VCA0522	cqsS	CAI-1 autoinducer sensor kinase/phosphatase CqsS
VCA0523	3.33229	1.78292	1.70478		3.0945	1.83906	METABOLISM	Coenzyme transport and metabolism	VCA0523	cqsA	CAI-1 autoinducer synthase
VC1653									VC1653	vieS
VC1652	1.58336				1.56931	1.31517	CELLULAR PROCESSES AND SIGNALING	Signal transduction mechanisms	VC1652	vieA	Response regulator VieA
VC1651	2.03078		1.83262		2.0902	1.79135	CELLULAR PROCESSES AND SIGNALING	Signal transduction mechanisms	VC1651	vieB	Response regulator VieB
VC2453	1.41697		1.34788		1.46874	1.30658	CELLULAR PROCESSES AND SIGNALING	Signal transduction mechanisms	VC2453	varS	Signal transduction histidine-protein kinase barA
VC1213	1.7761			1.23851	1.42568	1.54026	CELLULAR PROCESSES AND SIGNALING	Signal transduction mechanisms	VC1213	varA	Response regulator uvrY
DGCs and PDEs (c-di-GMP)
DGCc
VCA0697	4.03277		4.41437		5.45125	3.29397			VCA0697	cdgD
VC1593	3.39521								VC1593	acgB	putative GGDEF family protein
VC1104									VC1104	cdgK
VCA0074					1.34172		CELLULAR PROCESSES AND SIGNALING	Signal transduction mechanisms	VCA0074	cdgA	putative Transcriptional regulator CdgA
VC1067	2.04201	1.35227	1.40939		1.94423	1.48884	CELLULAR PROCESSES AND SIGNALING	Signal transduction mechanisms	VC1067	cdgH	putative ABC-type amino acid transport/signal transduction systems, periplasmic component/domain
VC2285	1.39691						CELLULAR PROCESSES AND SIGNALING	Signal transduction mechanisms	VC2285	cdgL	putative GGDEF family protein
VC1376	1.55314	1.50657	1.33866	1.39904			CELLULAR PROCESSES AND SIGNALING	Signal transduction mechanisms	VC1376	cdgM	putative GGDEF family protein
VCA0939						1.66515	CELLULAR PROCESSES AND SIGNALING	Signal transduction mechanisms	VCA0939		putative Sensory box/GGDEF family protein
VC2454			1.45651	1.55352	1.82831		CELLULAR PROCESSES AND SIGNALING	Signal transduction mechanisms	VC2454	vpvC	putative GGDEF domain fused with Signal transduction histidine kinase
VC1372	1.64527	1.34824			1.34199		CELLULAR PROCESSES AND SIGNALING	Signal transduction mechanisms	VC1372		putative GGDEF family protein
PDEs
VCA0785	5.26634	3.3868			4.79428	1.54095	CELLULAR PROCESSES AND SIGNALING	Signal transduction mechanisms	VCA0785	cdgC	putative c-di-GMP synthetase with GAF and EAL domains
VC1592									VC1592	acgA
VC1652	1.58336				1.56931	1.31517	CELLULAR PROCESSES AND SIGNALING	Signal transduction mechanisms	VC1652	vieA	Response regulator VieA
VC0137	1.42975		1.29225		1.32459	1.40297	CELLULAR PROCESSES AND SIGNALING	Signal transduction mechanisms	VC0137	cdgJ	putative Metal-dependent phosphohydrolase (Predicted signal transduction protein)
VC0130	1.64182		1.62406		1.58174	1.69318	CELLULAR PROCESSES AND SIGNALING	Signal transduction mechanisms	VC0130	cdpA	putative EAL family protein
VC0653	1.40486	1.53635			1.26936		CELLULAR PROCESSES AND SIGNALING	Signal transduction mechanisms	VC0653	rocS	putative EAL,GGDEF and PAS domains carrying protein
VC0703	3.1273	1.70195	1.67469		2.91703	1.80958	CELLULAR PROCESSES AND SIGNALING	Signal transduction mechanisms	VC0703	mbaA	Biofilm architecture maintenance protein mbaA
VC1851	1.29187		1.50343		1.57752
c-di-GMP receptor proteins with PilZ domains
VC0697	1.49927					1.31525			VC0697	PlzA
VC1885	1.36833				1.33701				VC1885	PlzB	enhancer of motility
VC2344		1.30189	1.53322			1.4918			VC2344	PlzC	enhancer of motility
VCA0042					1.3558				VCA0042	PlzD	repressor or motility
VCA0735		1.2998							VCA0735	PlzE
small regulatory RNAs
VC1020/VC1021										Qrr1
VCA0040/VCA0041										Qrr2
VCA0040	1.70612	1.38164			1.29728	-	POORLY CHARACTERIZED	Function unknown	VCA0040		conserved hypothetical protein
VCA0826/VCA0827										Qrr3
VCA0826	2.71548	4.62796	7.3233	4.39668
VCA0827	2.87854	2.69385	2.34137	2.53441			METABOLISM	Coenzyme transport and metabolism	VCA0827	phhB	Pterin-4-alpha-carbinolamine dehydratase
VCA0958/VCA0959										Qrr4
VCA0958			1.31845				INFORMATION STORAGE AND PROCESSING	Transcription	VCA0958		putative transcriptional regulator
VC0190/VC0191									VC0190/VC0191	csrB
VC0190	1.5154	1.22823			1.47719	1.25017	INFORMATION STORAGE AND PROCESSING	Replication, recombination and repair	VC0190	uvrD	DNA helicase II
VC0882/VC0883									VC0882/VC0883	csrC
VCA0839/ VCA0840									VCA0839/ VCA0840	csrD
VCA0840	2.52185	1.93488		1.3777	1.82033	1.32086	METABOLISM	Nucleotide transport and metabolism	VCA0840		putative deoxycytidylate deaminase
VCA1078 (3'UTR)									VCA1078 (3'UTR)	vqmR
VC1743 (5'-UTR)			2.18769	1.61985	1.78637	1.35216	METABOLISM	Amino acid transport and metabolism		vrrA	putative 1-aminocyclopropane-1-carboxylate deaminase
VC0106/VC0107										ryhB
PTS systems-related
VC0122	1.79609	2.33833	1.87376	1.45859	1.22502		METABOLISM	Nucleotide transport and metabolism	VC0122	cyaA	adenylate cyclase
VC0207		1.66685			1.27583	1.39845	METABOLISM	Carbohydrate transport and metabolism	VC0207	murP	PTS system N-acetylmuramic acid-specific EIIBC component [Includes: N-acetylmuramic acid-specific phosphotransferase enzyme IIB component ; N-acetylmuramic acid permease IIC component]
VC0398	1.25357	1.20349					CELLULAR PROCESSES AND SIGNALING	Signal transduction mechanisms	VC0398		putative regulatory protein CsrD
VC0606				2.21139	2.31694		METABOLISM	Amino acid transport and metabolism	VC0606	glnB	Nitrogen regulatory protein P-II
VC0672	1.49612	1.2399			1.2337	1.22292	CELLULAR PROCESSES AND SIGNALING	Signal transduction mechanisms	VC0672	ptsP	Phosphoenolpyruvate-protein phosphotransferase ptsP
VC0900	1.22478						CELLULAR PROCESSES AND SIGNALING	Signal transduction mechanisms	VC0900		putative ATPase involved in DNA repair fused with GGDEF family protein
VC0910	1.32008	3.34657		2.77333	3.63573	2.50262	METABOLISM	Carbohydrate transport and metabolism	VC0910	treB	PTS system trehalose-specific EIIBC component [Includes: Trehalose-specific phosphotransferase enzyme IIB component ; Trehalose permease IIC component]
VC0964	1.54374		1.25621		1.34945	1.42978	METABOLISM	Carbohydrate transport and metabolism	VC0964	crr	Glucose-specific phosphotransferase enzyme IIA component
VC0965			1.32965	1.38909	1.45038		METABOLISM	Carbohydrate transport and metabolism	VC0965	ptsI	Phosphoenolpyruvate-protein phosphotransferase
VC0966	1.81853	1.26541	1.50547		1.8695	1.45698	METABOLISM	Carbohydrate transport and metabolism	VC0966	ptsH	Phosphocarrier protein HPr
VC0995											PTS system N-acetylglucosamine-specific transporter subunit IIABC
VC1283											EIIB/C family (fructose)
VC1291	1.43062	1.543	1.44194	1.35542			CELLULAR PROCESSES AND SIGNALING	Signal transduction mechanisms	VC1291		putative signal-transduction protein containing cAMP-binding and CBS domains
VC1655	3.01773		1.58005		2.08843	2.29469	METABOLISM	Inorganic ion transport and metabolism	VC1655		putative Mg/Co/Ni transporter MgtE
VC1721	1.2215	1.32242	1.62846	1.48235			INFORMATION STORAGE AND PROCESSING	Transcription	VC1721	purR	HTH-type transcriptional repressor purR
VC1742		1.50175	5.41909	3.26914	3.6629	1.65508					Hypothetical protein
VC1817	2.82665	2.04169	1.50022	2.10254		1.40283	METABOLISM	Secondary metabolites biosynthesis, transport and catabolism	VC1817		putative Sigma-54 dependent transcriptional regulator
VC1820	5.8441	9.73133		2.16278	12.4476		CELLULAR PROCESSES AND SIGNALING	Signal transduction mechanisms	VC1820		putative PTS system, fructose/mannitol specific IIA subunit
VC1821		6.04027	1.56202	3.68272	3.79149	5.72744	METABOLISM	Carbohydrate transport and metabolism	VC1821		putative PTS system, fructose-specific IIBC component frwBC
VC1822	1.88017	2.98841			2.42512	1.56666	CELLULAR PROCESSES AND SIGNALING	Signal transduction mechanisms	VC1822		putative PTS system fructose-specific IIA/IIB/IIC components
VC1823	2.25031	2.62136			2.99381		METABOLISM	Carbohydrate transport and metabolism	VC1823	frwB	Fructose-like phosphotransferase enzyme IIB component 2
VC1824	1.51886	2.77064			1.887	1.79682	CELLULAR PROCESSES AND SIGNALING	Signal transduction mechanisms	VC1824		putative PTS system, fructose/mannitol specific IIA subunit fused with PTS-HPr like protein
VC1825	3.3286	3.3285			4.28481		INFORMATION STORAGE AND PROCESSING	Transcription	VC1825		Putative ARAC-type regulatory protein
VC1826	2.76622	11.0342		3.46877	9.50003	3.93809	CELLULAR PROCESSES AND SIGNALING	Signal transduction mechanisms	VC1826		putative PTS system, fructose-specific IIABC component
VC1827	1.87471	10.8679		3.37964	6.28735	5.72427	METABOLISM	Carbohydrate transport and metabolism	VC1827	manA	Mannose-6-phosphate isomerase
VC2013	2.2233	1.26589	1.26372	1.37068	1.63115	1.73075	METABOLISM	Carbohydrate transport and metabolism	VC2013	ptsG	PTS system glucose-specific EIICB component [Includes: Glucose permease IIC component ; Glucose-specific phosphotransferase enzyme IIB component]
VC2531	1.24334				1.30639		CELLULAR PROCESSES AND SIGNALING	Signal transduction mechanisms	VC2531	ptsN	Nitrogen regulatory protein [Includes: Phosphotransferase enzyme IIA component]
VC2533	1.8098				1.56952	1.49892	METABOLISM	Carbohydrate transport and metabolism	VC2533	ptsO	Phosphocarrier protein NPr
VC2689	1.60461	1.18796	1.49992		1.74849	1.36975	METABOLISM	Carbohydrate transport and metabolism	VC2689	pfkA	6-phosphofructokinase
VC2720		1.43603	1.31376			1.23883	POORLY CHARACTERIZED	Function unknown	VC2720	nfuA	Fe/S biogenesis protein nfuA
VC2738	1.2832						METABOLISM	Energy production and conversion	VC2738	pck	Phosphoenolpyruvate carboxykinase [ATP]
VCA0245	1.73732						CELLULAR PROCESSES AND SIGNALING	Signal transduction mechanisms	VCA0245	ulaC	Ascorbate-specific phosphotransferase enzyme IIA component
VCA0246											Ascorbate-specific phosphotransferase enzyme IIB/C component
VCA0516	1.80018	1.69592		2.93243		3.02789	METABOLISM	Carbohydrate transport and metabolism	VCA0516	fruA	PTS system fructose-specific EIIBC component [Includes: Fructose-specific phosphotransferase enzyme IIB component ; Fructose permease IIC component]
VCA0518		2.09128		3.47578	3.76123	1.90031	METABOLISM	Carbohydrate transport and metabolism	VCA0518		putative Fructose-specific phosphocarrier protein HPr
VCA0653	1.51998	2.42152		2.11593	3.19434		METABOLISM	Carbohydrate transport and metabolism	VCA0653	scrA	PTS system sucrose-specific EIIBC component [Includes: Sucrose-specific phosphotransferase enzyme IIB component ; Sucrose permease IIC component]
VCA0744	2.02681			1.61367		1.96401	METABOLISM	Energy production and conversion	VCA0744	glpK	Glycerol kinase
VCA0943	1.67653	1.4194	2.38474		1.71114	2.34972	METABOLISM	Carbohydrate transport and metabolism	VCA0943	malG	Maltose transport system permease protein malG
VCA1045	1.47585	1.8357	1.58432	1.29111			METABOLISM	Carbohydrate transport and metabolism	VCA1045	mtlA	PTS system mannitol-specific EIICBA component [Includes: Mannitol permease IIC component ; Mannitol-specific phosphotransferase enzyme IIB component ; Mannitol-specific phosphotransferase enzyme IIA component]
VCA1046	1.64989	1.67108	1.27109	1.27161	1.29055		METABOLISM	Carbohydrate transport and metabolism	VCA1046	mtlD	Mannitol-1-phosphate 5-dehydrogenase
Other
VC0122	1.79609	2.33833	1.87376	1.45859	1.22502		METABOLISM	Nucleotide transport and metabolism	VC0122	cyaA	adenylate cyclase
VC2451	1.40002	1.21517			1.46158		CELLULAR PROCESSES AND SIGNALING	Signal transduction mechanisms	VC2451	relA	GTP pyrophosphokinase
VC1224	1.97097	2.33785	2.10209	1.79687			POORLY CHARACTERIZED	Function unknown	VC1224	relV	conserved hypothetical protein
VC2710									VC2710	spoT
Heat- and cold-shock related genes
GeneID	22Sbv37R	37Sv37R	22Sv37S	22Sv22Sb	22Sv37R	37Sv22Sb	Class	Description	GENEID	Symbol	GeneName
VCA0184	2.87712		2.50644		2.80031	2.58872	INFORMATION STORAGE AND PROCESSING	Transcription	VCA0184	capB	Cold shock protein CapB
VCA0166	3.51894	1.41585	1.85748		2.68137	2.45178	INFORMATION STORAGE AND PROCESSING	Transcription	VCA0166	cspG	Cold shock-like protein CspG
VCA0933		1.41439	2.04101	1.78704			INFORMATION STORAGE AND PROCESSING	Transcription	VCA0933	cspG	Cold shock protein CspG
VCA0804		1.46553	1.7611	2.38586	2.52919	1.35371	INFORMATION STORAGE AND PROCESSING	Replication, recombination and repair	VCA0804	deaD	Cold-shock DEAD box protein A
VC1142		1.37591					INFORMATION STORAGE AND PROCESSING	Transcription	VC1142	cspD	Cold shock-like protein cspD
VCA0819	4.33408		3.92036		5.09795	3.35949	CELLULAR PROCESSES AND SIGNALING	Posttranslational modification, protein turnover, chaperones	VCA0819	groS	10 kDa chaperonin
VCA0820	5.75156	1.95456	3.12958		6.23727	2.90196	CELLULAR PROCESSES AND SIGNALING	Posttranslational modification, protein turnover, chaperones	VCA0820	groL	60 kDa chaperonin
VC2664	1.62764	1.94434			1.549		CELLULAR PROCESSES AND SIGNALING	Posttranslational modification, protein turnover, chaperones	VC2664	groL	60 kDa chaperonin
VC1386			1.77609		1.72602		CELLULAR PROCESSES AND SIGNALING	Posttranslational modification, protein turnover, chaperones	VC1386		Putative heat shock protein YegD
VC1117	1.90678	2.39894	2.01076	1.62007		1.24057	CELLULAR PROCESSES AND SIGNALING	Posttranslational modification, protein turnover, chaperones	VC1117	htpX	Heat shock protein htpX
VC1374	1.4432			1.42894		1.29312	CELLULAR PROCESSES AND SIGNALING	Posttranslational modification, protein turnover, chaperones	VC1374		putative Heat shock protein Hsp70
VC2735		1.39008	1.79226		1.31005	1.44929	INFORMATION STORAGE AND PROCESSING	Translation, ribosomal structure and biogenesis	VC2735	hslR	Heat shock protein 15
VC0018		2.32299	5.51225	2.02746	2.41622	2.71928	CELLULAR PROCESSES AND SIGNALING	Posttranslational modification, protein turnover, chaperones	VC0018	ibpA	Small heat shock protein ibpA
VC1663									VC1663		putative heat-shock protein
