# Supplementary material for: BipA exerts temperature-dependent translational control of biofilm-associated colony morphology in Vibrio cholerae
Source: eLife. 2021 Feb 16;10:e60607. doi: 10.7554/eLife.60607 (PMC7886329; doi:10.7554/eLife.60607)
Supplement: Supplementary file 5. [file elife-60607-supp5.xlsx]

## Sheet: co969 rugose Tn-mutants at 22ºC
Tnseq library Vc co969 rugose colonies at 22ºC: mutated genes ordered by total reads/clone
OBS! Only genes with number of genes per clone >1 are considered as candidates
Locus	# of hit TAs	Total TAs	Fraction TAs hit	Total reads	Avg_Reads per TA	Reads per clone	Gene
VC_2750	24	139	0.173	43606	313.7	20.5495	putative EAL and GGDEF domains family protein
VC_0703	22	115	0.191	35477	308.5	16.7187	Biofilm architecture maintenance protein mbaA
VC_0998	27	165	0.164	35225	213.5	16.5999	hubP (polar transmembrane protein)
VC_2744	7	71	0.099	31034	437.1	14.6249	GTP-binding protein typA/BipA
VC_2535	12	59	0.203	29710	503.6	14.0009	tldE (peptidase PmbA)
VC_2068	18	58	0.31	26133	450.6	12.3153	flagellar biosynthesis regulator FlhF
VC_0422	9	57	0.158	25069	439.8	11.8139	TldD protein (Peptidases of Unknown Catalytic Type)
VC_2344	34	110	0.309	24840	225.8	11.7059	pilus assembly protein PilZ
VC_2128	16	58	0.276	22393	386.1	10.5528	putative Flagellar hook-length control protein fliK
VC_2627	15	59	0.254	21246	360.1	10.0123	putative DamX-related protein
VC_2775	13	71	0.183	21073	296.8	9.93073	gidA (tRNA uridine 5-carboxymethylaminomethyl modification enzyme mnmG)
VC_2195	11	33	0.333	20364	617.1	9.59661	Flagellar basal-body rod protein flgG
VC_0420	33	146	0.226	16343	111.9	7.7017	hypothetical protein (Possible exported protein)
VC_0965	9	78	0.115	14460	185.4	6.81433	ptsI (Phosphoenolpyruvate-protein phosphotransferase)
VC_2059	6	24	0.25	14135	589	6.66117	purine-binding chemotaxis protein CheW
VC_2120	9	38	0.237	13985	368	6.59048	Flagellar biosynthetic protein flhB
VC_2677	5	30	0.167	12687	422.9	5.97879	HTH-type transcriptional repressor cytR
VC_2140	14	63	0.222	12453	197.7	5.86852	fliD (flagellar capping protein)
VC_2135	14	67	0.209	12415	185.3	5.85061	two-component system, response regulator FlrC (Fis family transcriptional regulator)
VC_2069	23	86	0.267	12372	143.9	5.83035	Flagellar biosynthesis protein flhA
VC_2208	15	51	0.294	12084	236.9	5.69463	hypothetical protein (flagellar protein FlgT)
VC_0003	10	51	0.196	11430	224.1	5.38643	tRNA modification GTPase TrmE
VC_0659	5	62	0.081	10920	176.1	5.14609	prfC (Peptide chain release factor 3)
VC_0249	6	128	0.047	10487	81.9	4.94204	rfbl (putative LONG-CHAIN-FATTY-ACID--COA LIGASE)
VC_2062	5	53	0.094	10041	189.5	4.73186	response regulator CheB (chemotaxis-specific methylesterase)
VC_2005	4	19	0.211	9859	518.9	4.64609	hypothetical protein (118 aa)
VC_2197	22	74	0.297	9645	130.3	4.54524	flagellar hook protein FlgE
VC_0900	15	70	0.214	9116	130.2	4.29595	putative ATPase involved in DNA repair fused with GGDEF family protein
VC_2134	4	13	0.308	8999	692.2	4.24081	Flagellar hook-basal body complex protein fliE
VC_0244	5	86	0.058	8995	104.6	4.23893	perosamine synthase (involved in LPS metabolism?)
VC_2207	6	32	0.188	8985	280.8	4.23421	conserved hypothetical protein (orthology with Flagellar protein FlgO, membrane protein, lipoprotein)
VC_2534	2	43	0.047	8525	198.3	4.01744	putative Mg/Co/Ni transporter MgtE
VC_2192	8	34	0.235	8447	248.4	3.98068	Peptidoglycan hydrolase flgJ
VC_0274	11	37	0.297	8015	216.6	3.7771	hypothetical protein (orthology with peptidyl-prolyl cis-trans isomerase)
VC_2437	3	55	0.055	7673	139.5	3.61593	fragment of Bifunctional protein hldE [Includes: D-beta-D-heptose 7-phosphate kinase ; D-beta-D-heptose 1-phosphate adenosyltransferase] (part 1)
VC_1428	3	52	0.058	7598	146.1	3.58058	Spermidine/putrescine import ATP-binding protein potA
VC_0653	18	81	0.222	7359	90.9	3.46795	putative EAL,GGDEF and PAS domains carrying protein
VC_0234	5	60	0.083	7181	119.7	3.38407	putative Mannosyltransferase OCH1 and related enzyme
VC_2066	5	37	0.135	7163	193.6	3.37559	fliA (RNA polymerase sigma factor for flagellar operon)
VC_2190	17	60	0.283	7026	117.1	3.31103	Flagellar hook-associated protein FlgL
VC_2199	11	23	0.478	7000	304.3	3.29877	putative Flagellar basal-body rod protein FlgC
VC_2529	6	61	0.098	6925	113.5	3.26343	rpoN (RNA polymerase, sigma 54 (sigma N) factor)
VC_A0920	6	29	0.207	6768	233.4	3.18944	hypothetical protein (199 aa, ortholog with putative Leucine-rich repeat protein)
VC_0251	9	162	0.056	6679	41.2	3.1475	acyl protein synthase/acyl-CoA reductase RfbN (orthology with LuxE)
VC_2123	8	35	0.229	6632	189.5	3.12535	flagellar biosynthesis protein FliP
IG_VC_0430	1	13	0.077	6463	497.2	3.04571	VC0430 is putative TRAP transporter solute receptor, TAXI family, periplasmic component
VC_0243	8	97	0.082	6309	65	2.97314	rfbD (GDP-mannose 4,6-dehydratase)
VC_A1105	1	34	0.029	6244	183.6	2.94251	DNA-binding response regulator, two-component system, OmpR family
IG_VC_1722	4	26	0.154	6200	238.5	2.92177	VC1722 is Positive regulator of competence TfoX-2
VC_2312	4	42	0.095	5908	140.7	2.78417	mltA (membrane-bound lytic murein transglycosylase A)
VC_0046	4	22	0.182	5765	262	2.71678	def-1 (Peptide deformylase 1)
VC_2061	4	47	0.085	5674	120.7	2.67389	ParA family protein
VC_0660	2	38	0.053	5663	149	2.66871	srmb (ATP-dependent RNA helicase srmB)
VC_2193	7	35	0.2	5513	157.5	2.59802	flgI (Flagellar P-ring protein)
VC_2063	5	112	0.045	5396	48.2	2.54288	chemotaxis protein CheA
IG_VC_2134	1	2	0.5	5392	2696	2.541	VC2134 is fliE (Flagellar hook-basal body complex protein fliE)
VC_1903	3	119	0.025	5267	44.3	2.48209	DNA translocase FtsK
VC_2442	5	59	0.085	5262	89.2	2.47974	pho4 family protein (inorganic phosphate transporter, PiT family)
VC_0241	23	107	0.215	5214	48.7	2.45712	mannose-1-phosphate guanylyltransferase
VC_0304	19	68	0.279	5010	73.7	2.36098	gppA (Guanosine-5'-triphosphate,3'-diphosphate pyrophosphatase)
IG_VC_2070	1	20	0.05	4860	243	2.29029	VC2070 is putative phosphohistidine phosphatase SixA (157 aa)
VC_0704	2	60	0.033	4816	80.3	2.26956	nspS (norspermidine sensor)
VC_2352	1	56	0.018	4799	85.7	2.26155	Nucleoside permease nupX
VC_1424	5	55	0.091	4700	85.5	2.21489	potD (Spermidine/putrescine-binding periplasmic protein)
VC_2121	8	33	0.242	4445	134.7	2.09472	flagellar biosynthesis protein FliR
VC_2133	20	65	0.308	4356	67	2.05278	putative Flagellar M-ring protein fliF
VC_2191	21	78	0.269	4274	54.8	2.01414	flgM (Hook associated protein)
VC_2023	1	44	0.023	4202	95.5	1.98021	fabH (3-oxoacyl-[acyl-carrier-protein] synthase 3)
VC_1942	1	42	0.024	4182	99.6	1.97078	Bifunctional protein folD [Includes: Methylenetetrahydrofolate dehydrogenase ; Methenyltetrahydrofolate cyclohydrolase]
VC_1231	2	34	0.059	4129	121.4	1.94581	cytidine deaminase
VC_2273	1	47	0.021	4015	85.4	1.89208	proA (gamma-glutamylphosphate reductase)
VC_2131	5	25	0.2	3990	159.6	1.8803	fliH (flagellar assembly protein H)
VC_2137	12	54	0.222	3746	69.4	1.76532	flrA (Sigma 54 transcriptional activator)
VC_2456	2	64	0.031	3651	57	1.72055	hypothetical protein
VC_2194	12	35	0.343	3642	104.1	1.71631	putative Flagellar L-ring protein FlgH
IG_VC_0347	1	13	0.077	3580	275.4	1.68709	RNA-binding protein Hfq
VC_0225	1	42	0.024	3552	84.6	1.67389	lipopolysaccharide biosynthesis protein
VC_1348	7	67	0.104	3505	52.3	1.65174	putative two-component system response regulator
VC_0709	1	35	0.029	3489	99.7	1.6442	rluD (23S rRNA pseudouridine synthase D)
VC_2127	4	18	0.222	3345	185.8	1.57634	putative Flagellar biosynthesis protein fliL
VC_2130	11	45	0.244	3265	72.6	1.53864	fliI (flagellum-specific ATP synthase)
VC_2126	8	33	0.242	3181	96.4	1.49906	flagellar motor switch protein FliM
VC_2230	2	23	0.087	3140	136.5	1.47974	gmhA (phosphoheptose isomerase, LPS biosinthesis)
VC_2203	7	32	0.219	3019	94.3	1.42271	putative Flagellar basal-body P-ring formation protein flgA
VC_2260	1	42	0.024	2861	68.1	1.34826	rpsB (30S ribosomal protein S2)
VC_0691	2	41	0.049	2850	69.5	1.34307	anmk (Anhydro-N-acetylmuramic acid kinase)
VC_1427	3	53	0.057	2805	52.9	1.32187	Spermidine/putrescine transport system permease protein potB
VC_2206	4	22	0.182	2745	124.8	1.29359	hypothetical protein (flagellar protein FlgP)
VC_2684	3	90	0.033	2622	29.1	1.23563	metL (Bifunctional aspartokinase/homoserine dehydrogenase II)
VC_2205	7	19	0.368	2514	132.3	1.18473	hypothetical protein (flagella synthesis protein FlgN)
VC_2749	13	57	0.228	2502	43.9	1.17908	glnG (Nitrogen regulation protein NR(I))
VC_0252	2	43	0.047	2476	57.6	1.16682	galactoside O-acetyltransferase
VC_2058	4	13	0.308	2359	181.5	1.11169	hypothetical protein (167 aa)
VC_2129	6	17	0.353	2356	138.6	1.11027	fliJ (flagellar biosynthesis chaperone)
VC_1384	1	23	0.043	2270	98.7	1.06975	hypothetical protein (membrane protein)
VC_2512	1	13	0.077	2226	171.2	1.04901	Putative translation initiation inhibitor, yjgF family (Endoribonuclease L-PSP)
VC_2518	1	16	0.062	2202	137.6	1.0377	hypothetical protein (orthology with phospholipid/cholesterol/gamma-HCH transport system substrate-binding protein)
VC_0694	1	60	0.017	2174	36.2	1.02451	putative Autolysin sensor kinase
VC_0966	1	11	0.091	2143	194.8	1.0099	ptsH (Phosphocarrier protein HPr)
IG_VC_2138	4	15	0.267	2019	134.6	0.951461	VC2138 is Flagellar protein FlaJ
VC_0419	1	55	0.018	1958	35.6	0.922714	ribonuclease G
VC_0245	3	113	0.027	1928	17.1	0.908577	rfbG (putative UDP-Glycosyltransferase/glycogen phosphorylase)
VC_A0627	1	21	0.048	1897	90.3	0.893968	putative rRNA methylase
VC_A0131	2	34	0.059	1892	55.6	0.891612	ribokinase (Pentose phosphate pathway)
VC_2278	1	53	0.019	1886	35.6	0.888784	Guanine/hypoxanthine permease pbuG
VC_0259	6	103	0.058	1760	17.1	0.829406	Lipopolysaccharide biosynthesis protein RfbV
VC_0121	2	9	0.222	1750	194.4	0.824694	hypothetical protein (48 aa) (only orthologs in Vibrio); VC0122 cyaA adenylate cyclase; VC0119 hemC porphobilinogen deaminase
IG_VC_1592	1	15	0.067	1692	112.8	0.797361	VC1591 short chain dehydrogenase/reductase family oxidoreductaseVC0121 EAL family protein; VC1592 GGDEF family protein; VC1593 GGDEF family protein
IG_VC_2679	1	13	0.077	1642	126.3	0.773798	VC2678 primosome assembly protein PriA; VC2679 rpmE (50S ribosomal subunit protein L31); VC2681 malate oxidoreductase
IG_VC_2205	1	7	0.143	1634	233.4	0.770028	VC2205 flagellar protein FlgN; VC2205 hypothetical protein (flagella synthesis protein FlgN)
VC_0634	1	20	0.05	1563	78.2	0.736569	transcription elongation factor GreA
VC_1831	1	123	0.008	1562	12.7	0.736098	putative Methyl-accepting chemotaxis protein
VC_0333	1	33	0.03	1554	47.1	0.732328	TetR family transcriptional regulator
VC_A1067	3	58	0.052	1540	26.6	0.72573	calB Coniferyl aldehyde dehydrogenase
VC_0793	1	59	0.017	1500	25.4	0.70688	oadA (fragment of Oxaloacetate decarboxylase alpha chain (part 1))
VC_0250	4	72	0.056	1464	20.3	0.689915	putative iron-containing alcohol dehydrogenase
VC_2565	1	22	0.045	1398	63.5	0.658812	Protein elaA
IG_VC_0218	1	16	0.062	1384	86.5	0.652215	VC0217 DNA repair protein RadC; VC0218 rpmB (50S ribosomal protein L28)
IG_VC_2630	4	15	0.267	1317	87.8	0.620641	VC2630 fimbrial assembly protein (type IV pilus assembly protein PilQ); VC2631 fimbrial assembly protein PilP
IG_VC_0641	3	28	0.107	1308	46.7	0.6164	VCt048 (tRNA-Met-9); VC0641 Ribosome maturation factor rimP; VC0642 transcription elongation factor NusA
VC_2072	21	133	0.158	1301	9.8	0.613101	putative INSULIN-DEGRADING ENZYME (INSULYSIN) (INSULINASE) (INSULIN PROTEASE)
VC_2617	1	43	0.023	1295	30.1	0.610273	putative Arginine N-succinyltransferase beta subunit
VC_2188	10	41	0.244	1294	31.6	0.609802	flaA (Flagellin A)
VC_1608	1	50	0.02	1272	25.4	0.599434	putative ABC-type multidrug transport system, permease component
VC_A0527	1	43	0.023	1271	29.6	0.598963	Putative GTPase (G3E family)
VC_0654	1	23	0.043	1234	53.7	0.581527	putative lipid carrier protein
VC_A0987	1	71	0.014	1228	17.3	0.578699	ppsA (phosphoenolpyruvate synthase)
IG_VC_0654	6	23	0.261	1195	52	0.563148	VC0655 acetyltransferase; VC0654 putative lipid carrier protein
IG_VC_2192	3	16	0.188	1171	73.2	0.551838	VC2193 flagellar basal body P-ring biosynthesis protein FlgA; VC2192 Peptidoglycan hydrolase flgJ
VC_2629	7	34	0.206	1170	34.4	0.551367	aroK shikimate kinase I
VC_0290	1	18	0.056	1166	64.8	0.549482	DNA-binding protein fis
VC_0909	2	39	0.051	1129	28.9	0.532045	treR (trehalose repressor)
IG_VC_2196	2	3	0.667	1124	374.7	0.529689	VC2196 flagellar basal body rod protein FlgF; VC2197 flagellar hook protein FlgE
VC_0398	4	98	0.041	1081	11	0.509425	putative regulatory protein CsrD
VC_2089	5	80	0.062	1073	13.4	0.505655	sdhA (succinate dehydrogenase, flavoprotein subunit)
IG_VC_0901	2	7	0.286	1065	152.1	0.501885	VC0902 queF 7-cyano-7-deazaguanine reductase; VC0901 putative TPR-repeat-containing protein
VC_A0720	1	30	0.033	1058	35.3	0.498586	guanylate cyclase-like protein
VC_A1114	1	41	0.024	1002	24.4	0.472196	Chromosome (plasmid) partitioning protein ParB
VC_0347	1	12	0.083	987	82.2	0.465127	RNA-binding protein Hfq
VC_2122	4	13	0.308	955	73.5	0.450047	flagellar biosynthesis protein FliQ
VC_A0036	1	57	0.018	943	16.5	0.444392	Serine/threonine transporter sstT
IG_VC_0828	1	40	0.025	939	23.5	0.442507	VC0827 toxin co-regulated pilus biosynthesis protein H; VC0828 tcpA (Toxin coregulated pilin)
IG_VC_1711	1	27	0.037	934	34.6	0.440151	VC1710 diguanylate phosphodiesterase; VC1711 putative B12 binding domain (B12-BD)fused with Radical SAM superfamily protein
IG_VC_2200	1	1	1	923	923	0.434967	VC2200 putative Flagellar basal-body rod protein FlgB
IG_VC_2201	1	13	0.077	920	70.8	0.433553	VC2201 Chemotaxis protein methyltransferase
VC_0595	1	37	0.027	918	24.8	0.432611	gluQ (Glutamyl-Q tRNA(Asp) synthetase)
VC_A0765	1	40	0.025	908	22.7	0.427898	ltaE (Low specificity L-threonine aldolase)
VC_A0694	1	19	0.053	901	47.4	0.424599	hypothetical protein
VC_A1015	1	60	0.017	899	15	0.423657	Putative Na+/H+ antiporter NhaD type _
VC_A0661	1	21	0.048	882	42	0.415646	putative Domain amino terminal to FKBP-type peptidyl-prolyl isomerase
VC_2124	2	14	0.143	879	62.8	0.414232	putative Flagellar biosynthesis protein fliO
VC_0213	1	44	0.023	875	19.9	0.412347	htrB (Lipid A biosynthesis lauroyl acyltransferase)
VC_A0790	2	102	0.02	852	8.4	0.401508	conserved hypothetical protein (phage integrase)
VC_1760	2	185	0.011	825	4.5	0.388784	putative DNA/RNA helicase, SNF2 family
VC_1791	1	59	0.017	794	13.5	0.374175	putative Mu-like prophage protein
VC_0300	2	53	0.038	793	15	0.373704	putative signal-transduction protein containing cAMP-binding and CBS domains
VC_2364	3	89	0.034	793	8.9	0.373704	thrA (Bifunctional aspartokinase/homoserine dehydrogenase 1)
VC_A0770	1	4	0.25	786	196.5	0.370405	hypothetical protein (39 aa) (orthologs only in Vibrio); VCA0769 acyl carrier protein phosphodiesterase; VCA0772 tyrosine-specific transport protein
IG_VC_2040	1	8	0.125	769	96.1	0.362394	VC2041 nucleoid-associated protein NdpA; VC2040 hypothetical protein (71 aa)
VC_0785	1	2	0.5	767	383.5	0.361451	(no entry found); VC0784 sodium/alanine symporter
VC_2742	1	45	0.022	686	15.2	0.32328	putative Ribonuclease BN
VC_2139	4	17	0.235	673	39.6	0.317154	putative flagellar FliT protein
VC_A0068	2	70	0.029	673	9.6	0.317154	putative Methyl-accepting chemotaxis protein
IG_VC_2720	1	7	0.143	655	93.6	0.308671	VC2720 Fe/S biogenesis protein nfuA; VC2719 ComF-like protein
VC_1409	2	65	0.031	655	10.1	0.308671	putative RND efflux system, outer membrane lipoprotein, NodT
VC_2547	1	147	0.007	610	4.1	0.287465	conserved hypothetical protein (translocation and assembly module TamB)
VC_0995	1	73	0.014	577	7.9	0.271913	PTS system N-acetylglucosamine-specific transporter subunit IIABC
IG_VC_2212	1	26	0.038	560	21.5	0.263902	VC2211 viuA ferric vibriobactin receptor; VC2212 hypothetical protein (Fe3+-citrate ABC transporter substrate-b)
VC_0269	1	77	0.013	552	7.2	0.260132	mannose-6-phosphate isomerase
VC_1632	1	67	0.015	550	8.2	0.259189	putative nucleoside-diphosphate-sugar epimerase
VC_1722	3	32	0.094	482	15.1	0.227144	Positive regulator of competence TfoX-2
VC_2132	13	29	0.448	458	15.8	0.215834	fliG (flagellar motor switch protein G)
VC_A0311	1	21	0.048	456	21.7	0.214892	Plasmid stabilization system protein ParE (Toxin of TA system ParD-ParE)
VC_A0385	1	21	0.048	456	21.7	0.214892	Plasmid stabilization system ParE protein (toxin of TA system ParD-ParE)
VC_1647	2	82	0.024	453	5.5	0.213478	hypothetical protein (ABC transporter substrate-binding protein)
VC_0039	1	35	0.029	426	12.2	0.200754	putative Sporulation stage 0, protein M family protein
VC_A0544	1	56	0.018	399	7.1	0.18803	putative ATP-dependent endonuclease of the OLD family
VC_A0721	1	9	0.111	370	41.1	0.174364	hypothetical protein (53 aa) (only in Vibrio); VCA0720 guanylate cyclase-like protein
VC_0203	2	62	0.032	368	5.9	0.173421	Iron(3+)-hydroxamate import system permease protein fhuB
VC_A0120	4	147	0.027	352	2.4	0.165881	putative Type VI secretion system, IcmF
VC_0183	3	152	0.02	332	2.2	0.156456	hypothetical protein (phage integrase)
VC_2463	1	73	0.014	317	4.3	0.149387	GTP-binding protein lepA
VC_0559	1	44	0.023	305	6.9	0.143732	putative ABC-type uncharacterized transport system,permease component
VC_0242	16	109	0.147	292	2.7	0.137606	phosphomannomutase
IG_VC_1901	2	52	0.038	283	5.4	0.133365	VC1901 Na(+)/H(+) antiporter nhaB; VC1900 GntR family transcriptional regulator, negative regulator for fad regulon and positive regulator of fabA
VC_A0730	2	126	0.016	272	2.2	0.128181	putative SIR2-like domain protein
VC_2345	3	41	0.073	271	6.6	0.12771	serB (phosphoserine phosphatase)
VC_0919	5	38	0.132	259	6.8	0.122055	vpsC
VC_1741	1	38	0.026	254	6.7	0.119698	putative Transcription regulator, TetR-like
IG_VC_2752	26	647	0.04	244	0.4	0.114986	VC2751 adenosine deaminase; VCr019 (5S ribosomal RNA)
VC_0248	1	22	0.045	234	10.6	0.110273	putative acyl carrier protein
VC_0383	2	8	0.25	233	29.1	0.109802	hypothetical protein (RepB)
IG_VC_0342	1	101	0.01	232	2.3	0.109331	VC0342 putative 4Fe-4S ferredoxins iron-sulfur binding protein; VC0343 tRNA threonylcarbamoyladenosine biosynthesis protein TsaE
VC_1148	2	41	0.049	206	5	0.0970782
VC_2636	1	39	0.026	198	5.1	0.0933082
VC_0374	6	65	0.092	195	3	0.0918944
VC_0921	10	96	0.104	191	2	0.0900094
VC_0180	4	123	0.033	190	1.5	0.0895382
VC_2726	5	42	0.119	159	3.8	0.0749293
VC_0482	1	46	0.022	155	3.4	0.0730443
VC_2414	5	108	0.046	149	1.4	0.0702168
VC_0604	8	110	0.073	146	1.3	0.068803
IG_VC_0060	16	315	0.051	134	0.4	0.063148
VC_2290	13	63	0.206	132	2.1	0.0622055
IG_VC_0315	15	305	0.049	131	0.4	0.0617342
IG_VC_0714	15	307	0.049	131	0.4	0.0617342
IG_VC_2495	15	305	0.049	131	0.4	0.0617342
IG_VC_0161	16	300	0.053	130	0.4	0.061263
VC_1161	1	60	0.017	130	2.2	0.061263
IG_VC_0389	14	329	0.043	129	0.4	0.0607917
VC_0937	10	109	0.092	113	1	0.0532516
VC_0665	10	58	0.172	112	1.9	0.0527804
VC_2092	4	65	0.062	104	1.6	0.0490104
VC_2262	22	111	0.198	102	0.9	0.0480679
VC_A0074	9	51	0.176	97	1.9	0.0457116	CdgA
VC_1067	28	127	0.22	96	0.8	0.0452403
VC_0922	10	92	0.109	92	1	0.0433553
IG_VC_1470	1	14	0.071	90	6.4	0.0424128
IG_VC_1476	1	14	0.071	90	6.4	0.0424128
VC_0918	7	56	0.125	88	1.6	0.0414703
VC_0917	6	51	0.118	82	1.6	0.0386428
VC_0305	13	53	0.245	78	1.5	0.0367578
VC_2087	4	113	0.035	77	0.7	0.0362865
VC_0925	5	52	0.096	76	1.5	0.0358153
VC_0934	8	79	0.101	76	1	0.0358153
VC_0935	6	63	0.095	73	1.2	0.0344015
VC_2436	6	60	0.1	67	1.1	0.031574
VC_1774	3	75	0.04	64	0.9	0.0301602
VC_1920	6	93	0.065	61	0.7	0.0287465
VC_0430	13	49	0.265	59	1.2	0.027804
VC_2701	8	68	0.118	57	0.8	0.0268615
VC_2156	10	45	0.222	56	1.2	0.0263902
VC_0321	11	79	0.139	53	0.7	0.0249764
VC_0409	1	41	0.024	51	1.2	0.0240339
VC_2291	5	38	0.132	51	1.3	0.0240339
VC_0927	4	33	0.121	50	1.5	0.0235627
VC_0535	13	100	0.13	49	0.5	0.0230914
VC_0260	11	114	0.096	47	0.4	0.0221489
VC_2174	4	80	0.05	45	0.6	0.0212064
VC_0362	12	77	0.156	44	0.6	0.0207352
VC_2125	4	16	0.25	44	2.8	0.0207352
VC_1437	7	119	0.059	43	0.4	0.0202639
VC_0094	2	47	0.043	42	0.9	0.0197926
VC_0920	7	61	0.115	42	0.7	0.0197926
VC_0303	8	144	0.056	41	0.3	0.0193214
VC_2091	1	13	0.077	41	3.2	0.0193214
VC_0298	2	88	0.023	40	0.5	0.0188501
VC_2293	6	30	0.2	40	1.3	0.0188501
VC_0924	3	70	0.043	39	0.6	0.0183789
VC_A0002	2	83	0.024	39	0.5	0.0183789
VC_2756	4	68	0.059	38	0.6	0.0179076
VC_0345	12	89	0.135	37	0.4	0.0174364
VC_2012	2	87	0.023	37	0.4	0.0174364
VC_2081	10	48	0.208	37	0.8	0.0174364
VC_A0075	6	27	0.222	36	1.3	0.0169651
VC_1097	11	87	0.126	35	0.4	0.0164939
VC_1442	4	85	0.047	35	0.4	0.0164939
VC_2051	4	28	0.143	35	1.2	0.0164939
VC_0122	13	105	0.124	34	0.3	0.0160226
VC_2142	2	44	0.045	34	0.8	0.0160226
VC_2294	4	60	0.067	33	0.6	0.0155514
VC_A0830	1	41	0.024	33	0.8	0.0155514
VC_0761	6	24	0.25	30	1.2	0.0141376
VC_1730	3	99	0.03	30	0.3	0.0141376
VC_2052	5	89	0.056	30	0.3	0.0141376
VC_0629	1	135	0.007	29	0.2	0.0136664
VC_2138	6	22	0.273	29	1.3	0.0136664
VC_1684	2	27	0.074	28	1	0.0131951
VC_2210	3	44	0.068	28	0.6	0.0131951
IG_VC_1933	2	10	0.2	27	2.7	0.0127238
VC_2136	5	32	0.156	26	0.8	0.0122526
VC_2164	8	67	0.119	26	0.4	0.0122526
VC_2200	6	25	0.24	26	1	0.0122526
VC_2465	7	32	0.219	26	0.8	0.0122526
VC_0224	6	34	0.176	25	0.7	0.0117813
VC_A0040	3	47	0.064	25	0.5	0.0117813
VC_2082	7	36	0.194	24	0.7	0.0113101
VC_2153	2	34	0.059	24	0.7	0.0113101
VC_A0039	4	18	0.222	24	1.3	0.0113101
VC_0130	2	87	0.023	23	0.3	0.0108388
VC_0239	10	94	0.106	23	0.2	0.0108388
VC_1426	2	39	0.051	23	0.6	0.0108388
VC_1441	3	29	0.103	23	0.8	0.0108388
VC_2413	4	60	0.067	23	0.4	0.0108388
VC_0186	4	45	0.089	22	0.5	0.0103676
VC_0936	4	22	0.182	22	1	0.0103676
VC_1141	4	96	0.042	22	0.2	0.0103676
VC_A0358	1	18	0.056	22	1.2	0.0103676
VC_A0414	1	17	0.059	22	1.3	0.0103676
VC_A0449	1	18	0.056	22	1.2	0.0103676
VC_0379	2	36	0.056	21	0.6	0.00989632
VC_2544	3	38	0.079	20	0.5	0.00942507
VC_2733	1	71	0.014	20	0.3	0.00942507
VC_A1113	2	58	0.034	20	0.3	0.00942507
VC_0132	1	63	0.016	19	0.3	0.00895382
VC_0468	7	43	0.163	19	0.4	0.00895382
VC_0594	3	49	0.061	19	0.4	0.00895382
VC_1439	2	51	0.039	19	0.4	0.00895382
VC_2053	2	23	0.087	19	0.8	0.00895382
VC_2418	2	36	0.056	19	0.5	0.00895382
VC_2736	6	34	0.176	19	0.6	0.00895382
VC_1009	1	24	0.042	18	0.8	0.00848256
VC_2090	1	23	0.043	18	0.8	0.00848256
VC_2198	3	25	0.12	18	0.7	0.00848256
VC_2622	2	40	0.05	18	0.5	0.00848256
VC_2724	1	17	0.059	18	1.1	0.00848256
VC_2746	4	63	0.063	18	0.3	0.00848256
VC_1880	6	24	0.25	17	0.7	0.00801131
VC_2086	1	51	0.02	17	0.3	0.00801131
VC_2295	2	56	0.036	17	0.3	0.00801131
VC_0036	2	61	0.033	16	0.3	0.00754006
VC_1073	2	120	0.017	16	0.1	0.00754006
VC_2008	1	51	0.02	16	0.3	0.00754006
VC_2371	1	47	0.021	16	0.3	0.00754006
VC_2498	1	22	0.045	16	0.7	0.00754006
VC_A0631	1	24	0.042	16	0.7	0.00754006
IG_VC_0156	2	23	0.087	15	0.7	0.0070688
IG_VC_0584	3	18	0.167	15	0.8	0.0070688
VC_0048	2	52	0.038	15	0.3	0.0070688
VC_0355	4	33	0.121	15	0.5	0.0070688
VC_0556	5	65	0.077	15	0.2	0.0070688
VC_1093	1	42	0.024	15	0.4	0.0070688
VC_2356	2	69	0.029	15	0.2	0.0070688
VC_A0221	1	40	0.025	15	0.4	0.0070688
VC_A0774	2	60	0.033	15	0.2	0.0070688
VC_0125	4	63	0.063	14	0.2	0.00659755
VC_0531	2	34	0.059	14	0.4	0.00659755
VC_1435	2	36	0.056	14	0.4	0.00659755
VC_2196	2	26	0.077	14	0.5	0.00659755
VC_2309	2	42	0.048	14	0.3	0.00659755
VC_2445	3	65	0.046	14	0.2	0.00659755
VC_2446	1	39	0.026	14	0.4	0.00659755
VC_2644	1	39	0.026	14	0.4	0.00659755
VC_2662	1	20	0.05	14	0.7	0.00659755
VC_A0014	1	76	0.013	14	0.2	0.00659755
VC_A0223	1	114	0.009	14	0.1	0.00659755
VC_0068	1	53	0.019	13	0.2	0.0061263
VC_0399	2	62	0.032	13	0.2	0.0061263
VC_0576	1	31	0.032	13	0.4	0.0061263
VC_0876	1	32	0.031	13	0.4	0.0061263
VC_1279	3	78	0.038	13	0.2	0.0061263
VC_1469	2	70	0.029	13	0.2	0.0061263
VC_1475	2	70	0.029	13	0.2	0.0061263
VC_2608	2	69	0.029	13	0.2	0.0061263
VC_2710	2	83	0.024	13	0.2	0.0061263
IG_VC_0261	3	8	0.375	12	1.5	0.00565504
IG_VC_1048	1	8	0.125	12	1.5	0.00565504
IG_VC_1183	1	36	0.028	12	0.3	0.00565504
IG_VC_2378	1	11	0.091	12	1.1	0.00565504
VC_0031	1	35	0.029	12	0.3	0.00565504
VC_0200	2	101	0.02	12	0.1	0.00565504
VC_0755	2	52	0.038	12	0.2	0.00565504
VC_1098	2	40	0.05	12	0.3	0.00565504
VC_1516	1	83	0.012	12	0.1	0.00565504
VC_2088	2	37	0.054	12	0.3	0.00565504
VC_2466	2	19	0.105	12	0.6	0.00565504
VC_2485	4	29	0.138	12	0.4	0.00565504
VC_2606	1	69	0.014	12	0.2	0.00565504
VC_2628	1	43	0.023	12	0.3	0.00565504
IG_VC_0771	1	17	0.059	11	0.6	0.00518379
VC_0212	2	34	0.059	11	0.3	0.00518379
VC_0536	1	5	0.2	11	2.2	0.00518379
VC_0581	1	86	0.012	11	0.1	0.00518379
VC_0851	4	24	0.167	11	0.5	0.00518379
VC_0999	4	34	0.118	11	0.3	0.00518379
VC_1367	2	119	0.017	11	0.1	0.00518379	putative GGDEF family protein
VC_1732	5	50	0.1	11	0.2	0.00518379
VC_1967	1	119	0.008	11	0.1	0.00518379
VC_2067	4	48	0.083	11	0.2	0.00518379
VC_2083	5	34	0.147	11	0.3	0.00518379
VC_2143	3	43	0.07	11	0.3	0.00518379
VC_2311	2	25	0.08	11	0.4	0.00518379
VC_2353	1	36	0.028	11	0.3	0.00518379
VC_2643	1	25	0.04	11	0.4	0.00518379
VC_2650	2	14	0.143	11	0.8	0.00518379
VC_2702	2	23	0.087	11	0.5	0.00518379
VC_2741	1	17	0.059	11	0.6	0.00518379
VC_A0038	1	34	0.029	11	0.3	0.00518379
VC_A0185	1	16	0.062	11	0.7	0.00518379
VC_A0191	1	69	0.014	11	0.2	0.00518379
VC_A0767	8	33	0.242	11	0.3	0.00518379
VC_A0895	1	138	0.007	11	0.1	0.00518379
VC_A1098	1	70	0.014	11	0.2	0.00518379
IG_VC_2001	1	9	0.111	10	1.1	0.00471254
VC_0312	4	36	0.111	10	0.3	0.00471254
VC_0344	1	78	0.013	10	0.1	0.00471254
VC_0346	2	38	0.053	10	0.3	0.00471254
VC_0650	1	72	0.014	10	0.1	0.00471254
VC_0884	1	32	0.031	10	0.3	0.00471254
VC_1033	1	83	0.012	10	0.1	0.00471254
VC_1336	1	29	0.034	10	0.3	0.00471254
VC_A0180	2	47	0.043	10	0.2	0.00471254
VC_A0205	1	57	0.018	10	0.2	0.00471254
VC_A0222	1	33	0.03	10	0.3	0.00471254
VC_A0558	1	73	0.014	10	0.1	0.00471254
VC_A0805	1	66	0.015	10	0.2	0.00471254
IG_VC_0306	4	11	0.364	9	0.8	0.00424128
IG_VC_0494	1	38	0.026	9	0.2	0.00424128
IG_VC_2436	1	21	0.048	9	0.4	0.00424128
VC_0166	6	29	0.207	9	0.3	0.00424128
VC_0264	2	41	0.049	9	0.2	0.00424128
VC_0393	1	107	0.009	9	0.1	0.00424128
VC_0480	2	41	0.049	9	0.2	0.00424128
VC_1265	2	50	0.04	9	0.2	0.00424128
VC_1321	2	173	0.012	9	0.1	0.00424128
VC_1349	2	191	0.01	9	0	0.00424128
VC_1509	1	32	0.031	9	0.3	0.00424128
VC_1748	1	35	0.029	9	0.3	0.00424128
VC_1797	1	26	0.038	9	0.3	0.00424128
VC_1867	1	59	0.017	9	0.2	0.00424128
VC_1888	1	100	0.01	9	0.1	0.00424128
VC_1938	1	26	0.038	9	0.3	0.00424128
VC_2232	2	62	0.032	9	0.1	0.00424128
VC_2420	2	26	0.077	9	0.3	0.00424128
VC_2490	1	77	0.013	9	0.1	0.00424128
VC_A0044	1	150	0.007	9	0.1	0.00424128
VC_A0803	2	66	0.03	9	0.1	0.00424128
IG_VC_0601	1	5	0.2	8	1.6	0.00377003
IG_VC_1279	1	23	0.043	8	0.3	0.00377003
IG_VC_2129	1	8	0.125	8	1	0.00377003
VC_0029	2	38	0.053	8	0.2	0.00377003
VC_0044	1	40	0.025	8	0.2	0.00377003
VC_0097	1	23	0.043	8	0.3	0.00377003
VC_0135	2	55	0.036	8	0.1	0.00377003
VC_0196	2	62	0.032	8	0.1	0.00377003
VC_0370	1	54	0.019	8	0.1	0.00377003
VC_0390	1	157	0.006	8	0.1	0.00377003
VC_0508	1	29	0.034	8	0.3	0.00377003
VC_0525	3	18	0.167	8	0.4	0.00377003
VC_0911	1	74	0.014	8	0.1	0.00377003
VC_0969	1	51	0.02	8	0.2	0.00377003
VC_1413	1	81	0.012	8	0.1	0.00377003
VC_1596	1	48	0.021	8	0.2	0.00377003
VC_1629	3	120	0.025	8	0.1	0.00377003
VC_1885	1	18	0.056	8	0.4	0.00377003
VC_1918	3	83	0.036	8	0.1	0.00377003
VC_1975	1	61	0.016	8	0.1	0.00377003
VC_1983	1	77	0.013	8	0.1	0.00377003
VC_2209	3	271	0.011	8	0	0.00377003
VC_2338	1	128	0.008	8	0.1	0.00377003
VC_2417	2	52	0.038	8	0.2	0.00377003
VC_2469	1	70	0.014	8	0.1	0.00377003
VC_2598	1	31	0.032	8	0.3	0.00377003
VC_2654	1	22	0.045	8	0.4	0.00377003
VC_2693	2	55	0.036	8	0.1	0.00377003	Sensor protein CpxA
VC_A0016	2	92	0.022	8	0.1	0.00377003
VC_A0702	2	46	0.043	8	0.2	0.00377003
VC_A0894	1	26	0.038	8	0.3	0.00377003
IG_VC_0631	1	10	0.1	7	0.7	0.00329877
IG_VC_2472	1	7	0.143	7	1	0.00329877
IG_VC_A0107	1	39	0.026	7	0.2	0.00329877
IG_VC_A0844	1	4	0.25	7	1.8	0.00329877
VC_0026	2	39	0.051	7	0.2	0.00329877
VC_0127	1	28	0.036	7	0.2	0.00329877
VC_0156	2	123	0.016	7	0.1	0.00329877
VC_0179	3	78	0.038	7	0.1	0.00329877
VC_0217	2	24	0.083	7	0.3	0.00329877
VC_0257	1	59	0.017	7	0.1	0.00329877
VC_0263	3	29	0.103	7	0.2	0.00329877
VC_0328	2	188	0.011	7	0	0.00329877
VC_0353	1	39	0.026	7	0.2	0.00329877
VC_0395	1	43	0.023	7	0.2	0.00329877
VC_0555	1	8	0.125	7	0.9	0.00329877
VC_0612	2	98	0.02	7	0.1	0.00329877
VC_1156	1	62	0.016	7	0.1	0.00329877
VC_1478	1	59	0.017	7	0.1	0.00329877
VC_1486	2	84	0.024	7	0.1	0.00329877
VC_1679	1	37	0.027	7	0.2	0.00329877
VC_1710	1	117	0.009	7	0.1	0.00329877
VC_1740	2	97	0.021	7	0.1	0.00329877
VC_1789	1	59	0.017	7	0.1	0.00329877
VC_1879	1	111	0.009	7	0.1	0.00329877
VC_1907	4	57	0.07	7	0.1	0.00329877
VC_1962	1	16	0.062	7	0.4	0.00329877
VC_1965	5	33	0.152	7	0.2	0.00329877
VC_2031	1	70	0.014	7	0.1	0.00329877
VC_2159	1	24	0.042	7	0.3	0.00329877
VC_2292	1	37	0.027	7	0.2	0.00329877
VC_2373	1	171	0.006	7	0	0.00329877
VC_2453	1	113	0.009	7	0.1	0.00329877
VC_2484	3	78	0.038	7	0.1	0.00329877
VC_2689	1	43	0.023	7	0.2	0.00329877
VC_2698	1	62	0.016	7	0.1	0.00329877
VC_2711	1	66	0.015	7	0.1	0.00329877
VC_2739	2	76	0.026	7	0.1	0.00329877
VC_A0020	2	157	0.013	7	0	0.00329877
VC_A0153	1	25	0.04	7	0.3	0.00329877
VC_A0229	1	38	0.026	7	0.2	0.00329877
VC_A0371	1	59	0.017	7	0.1	0.00329877
VC_A0508	1	59	0.017	7	0.1	0.00329877
VC_A0589	1	46	0.022	7	0.2	0.00329877
VC_A0638	2	109	0.018	7	0.1	0.00329877
VC_A0665	1	79	0.013	7	0.1	0.00329877
VC_A0791	1	59	0.017	7	0.1	0.00329877
VC_A0883	2	58	0.034	7	0.1	0.00329877	conserved hypothetical protein
IG_VC_0059	1	21	0.048	6	0.3	0.00282752
IG_VC_0167	3	13	0.231	6	0.5	0.00282752
IG_VC_0196	1	11	0.091	6	0.5	0.00282752
IG_VC_0429	1	8	0.125	6	0.8	0.00282752
IG_VC_0512	3	77	0.039	6	0.1	0.00282752
IG_VC_2440	1	32	0.031	6	0.2	0.00282752
IG_VC_2503	2	10	0.2	6	0.6	0.00282752
IG_VC_A0086	1	6	0.167	6	1	0.00282752	hypothetical protein
IG_VC_A0767	2	5	0.4	6	1.2	0.00282752
VC_0042	1	64	0.016	6	0.1	0.00282752
VC_0056	2	43	0.047	6	0.1	0.00282752
VC_0149	2	40	0.05	6	0.1	0.00282752
VC_0151	1	61	0.016	6	0.1	0.00282752
VC_0154	1	47	0.021	6	0.1	0.00282752
VC_0174	1	33	0.03	6	0.2	0.00282752
VC_0188	2	68	0.029	6	0.1	0.00282752
VC_0216	2	69	0.029	6	0.1	0.00282752
VC_0232	1	20	0.05	6	0.3	0.00282752
VC_0364	1	11	0.091	6	0.5	0.00282752
VC_0423	2	49	0.041	6	0.1	0.00282752
VC_0464	1	28	0.036	6	0.2	0.00282752
VC_0490	1	170	0.006	6	0	0.00282752
VC_0491	1	49	0.02	6	0.1	0.00282752
VC_0493	1	49	0.02	6	0.1	0.00282752
VC_0554	1	119	0.008	6	0.1	0.00282752
VC_0583	3	23	0.13	6	0.3	0.00282752
VC_0622	1	171	0.006	6	0	0.00282752
VC_0630	2	77	0.026	6	0.1	0.00282752
VC_0651	1	44	0.023	6	0.1	0.00282752
VC_0760	1	59	0.017	6	0.1	0.00282752
VC_0856	1	33	0.03	6	0.2	0.00282752
VC_0926	1	59	0.017	6	0.1	0.00282752
VC_0988	1	82	0.012	6	0.1	0.00282752
VC_0990	1	23	0.043	6	0.3	0.00282752
VC_0993	1	55	0.018	6	0.1	0.00282752
VC_1010	1	26	0.038	6	0.2	0.00282752
VC_1050	3	46	0.065	6	0.1	0.00282752
VC_1145	2	92	0.022	6	0.1	0.00282752
VC_1198	2	153	0.013	6	0	0.00282752
VC_1429	1	49	0.02	6	0.1	0.00282752
VC_1448	1	106	0.009	6	0.1	0.00282752
VC_1650	1	137	0.007	6	0	0.00282752
VC_1681	2	52	0.038	6	0.1	0.00282752
VC_1782	1	51	0.02	6	0.1	0.00282752
VC_1798	1	63	0.016	6	0.1	0.00282752
VC_2018	1	43	0.023	6	0.1	0.00282752
VC_2279	1	67	0.015	6	0.1	0.00282752
VC_2400	1	59	0.017	6	0.1	0.00282752
VC_2412	1	55	0.018	6	0.1	0.00282752
VC_2424	1	69	0.014	6	0.1	0.00282752
VC_2601	1	39	0.026	6	0.2	0.00282752
VC_2700	3	149	0.02	6	0	0.00282752
VC_2709	1	7	0.143	6	0.9	0.00282752
VC_2716	2	71	0.028	6	0.1	0.00282752
VC_A0008	1	79	0.013	6	0.1	0.00282752
VC_A0080	1	104	0.01	6	0.1	0.00282752
VC_A0097	1	28	0.036	6	0.2	0.00282752
VC_A0196	1	26	0.038	6	0.2	0.00282752
VC_A0214	1	67	0.015	6	0.1	0.00282752	putative Multidrug resistance protein D
VC_A0400	1	28	0.036	6	0.2	0.00282752
VC_A0479	1	28	0.036	6	0.2	0.00282752
VC_A0762	1	53	0.019	6	0.1	0.00282752
VC_A0864	1	63	0.016	6	0.1	0.00282752
VC_A0939	1	41	0.024	6	0.1	0.00282752	vca0939
VC_A1013	1	30	0.033	6	0.2	0.00282752
IG_VC_0709	3	12	0.25	5	0.4	0.00235627
IG_VC_0955	1	2	0.5	5	2.5	0.00235627
IG_VC_1637	2	18	0.111	5	0.3	0.00235627
IG_VC_2058	1	33	0.03	5	0.2	0.00235627
IG_VC_2344	1	10	0.1	5	0.5	0.00235627
IG_VC_A0002	2	54	0.037	5	0.1	0.00235627
IG_VC_A0041	1	38	0.026	5	0.1	0.00235627
IG_VC_A0142	1	18	0.056	5	0.3	0.00235627
VC_0063	1	38	0.026	5	0.1	0.00235627
VC_0090	1	58	0.017	5	0.1	0.00235627
VC_0262	1	59	0.017	5	0.1	0.00235627
VC_0271	2	47	0.043	5	0.1	0.00235627
VC_0416	1	48	0.021	5	0.1	0.00235627
VC_0472	1	42	0.024	5	0.1	0.00235627
VC_0495	1	40	0.025	5	0.1	0.00235627
VC_0640	1	15	0.067	5	0.3	0.00235627
VC_0769	1	79	0.013	5	0.1	0.00235627
VC_0914	2	142	0.014	5	0	0.00235627
VC_0916	1	34	0.029	5	0.1	0.00235627
VC_0943	2	42	0.048	5	0.1	0.00235627
VC_1091	2	69	0.029	5	0.1	0.00235627
VC_1152	2	47	0.043	5	0.1	0.00235627
VC_1283	1	14	0.071	5	0.4	0.00235627
VC_1338	1	90	0.011	5	0.1	0.00235627
VC_1535	1	61	0.016	5	0.1	0.00235627
VC_1579	1	86	0.012	5	0.1	0.00235627
VC_1669	2	61	0.033	5	0.1	0.00235627
VC_1768	2	86	0.023	5	0.1	0.00235627
VC_1771	3	246	0.012	5	0	0.00235627
VC_1842	1	7	0.143	5	0.7	0.00235627
VC_1857	1	19	0.053	5	0.3	0.00235627
VC_1934	3	110	0.027	5	0	0.00235627
VC_1944	1	44	0.023	5	0.1	0.00235627
VC_1949	1	99	0.01	5	0.1	0.00235627
VC_2033	3	128	0.023	5	0	0.00235627
VC_2161	2	83	0.024	5	0.1	0.00235627
VC_2212	1	54	0.019	5	0.1	0.00235627
VC_2441	1	27	0.037	5	0.2	0.00235627
VC_2600	2	90	0.022	5	0.1	0.00235627
VC_2609	2	17	0.118	5	0.3	0.00235627
VC_2620	1	46	0.022	5	0.1	0.00235627
VC_2713	1	52	0.019	5	0.1	0.00235627
VC_2738	3	75	0.04	5	0.1	0.00235627
VC_A0510	1	160	0.006	5	0	0.00235627
VC_A0595	1	38	0.026	5	0.1	0.00235627
VC_A0710	1	46	0.022	5	0.1	0.00235627
VC_A0716	1	27	0.037	5	0.2	0.00235627
VC_A0780	1	48	0.021	5	0.1	0.00235627
VC_A0795	1	72	0.014	5	0.1	0.00235627
IG_VC_0241	1	42	0.024	4	0.1	0.00188501
IG_VC_0397	1	20	0.05	4	0.2	0.00188501
IG_VC_0406	1	1	1	4	4	0.00188501
IG_VC_0876	2	14	0.143	4	0.3	0.00188501
IG_VC_0917	2	31	0.065	4	0.1	0.00188501
IG_VC_1143	1	35	0.029	4	0.1	0.00188501
IG_VC_1562	2	9	0.222	4	0.4	0.00188501
IG_VC_1624	2	18	0.111	4	0.2	0.00188501
IG_VC_2291	1	4	0.25	4	1	0.00188501
IG_VC_2339	1	18	0.056	4	0.2	0.00188501
IG_VC_2683	1	20	0.05	4	0.2	0.00188501
IG_VC_A0141	1	5	0.2	4	0.8	0.00188501
IG_VC_A0330	4	81	0.049	4	0	0.00188501
IG_VC_A0477	2	10	0.2	4	0.4	0.00188501
VC_0010	2	36	0.056	4	0.1	0.00188501
VC_0093	2	87	0.023	4	0	0.00188501
VC_0171	1	68	0.015	4	0.1	0.00188501
VC_0207	1	51	0.02	4	0.1	0.00188501
VC_0282	1	52	0.019	4	0.1	0.00188501
VC_0377	3	14	0.214	4	0.3	0.00188501
VC_0386	1	44	0.023	4	0.1	0.00188501
VC_0389	2	71	0.028	4	0.1	0.00188501
VC_0429	1	108	0.009	4	0	0.00188501
VC_0452	1	43	0.023	4	0.1	0.00188501
VC_0459	1	17	0.059	4	0.2	0.00188501
VC_0503	1	80	0.013	4	0.1	0.00188501
VC_0526	1	43	0.023	4	0.1	0.00188501
VC_0551	1	50	0.02	4	0.1	0.00188501
VC_0586	1	36	0.028	4	0.1	0.00188501
VC_0672	2	102	0.02	4	0	0.00188501
VC_0721	2	36	0.056	4	0.1	0.00188501
VC_0758	1	44	0.023	4	0.1	0.00188501
VC_0964	2	21	0.095	4	0.2	0.00188501
VC_0992	1	82	0.012	4	0	0.00188501
VC_1018	1	91	0.011	4	0	0.00188501
VC_1036	1	80	0.013	4	0.1	0.00188501
VC_1081	1	55	0.018	4	0.1	0.00188501
VC_1087	1	75	0.013	4	0.1	0.00188501
VC_1104	2	85	0.024	4	0	0.00188501
VC_1138	1	24	0.042	4	0.2	0.00188501
VC_1287	1	94	0.011	4	0	0.00188501
VC_1334	1	26	0.038	4	0.2	0.00188501
VC_1558	1	72	0.014	4	0.1	0.00188501
VC_1649	1	119	0.008	4	0	0.00188501
VC_1753	1	68	0.015	4	0.1	0.00188501
VC_1824	1	31	0.032	4	0.1	0.00188501
VC_1862	2	44	0.045	4	0.1	0.00188501
VC_1990	1	69	0.014	4	0.1	0.00188501
VC_2040	1	12	0.083	4	0.3	0.00188501
VC_2055	1	34	0.029	4	0.1	0.00188501
VC_2166	1	24	0.042	4	0.2	0.00188501
VC_2380	1	39	0.026	4	0.1	0.00188501
VC_2382	1	30	0.033	4	0.1	0.00188501
VC_2384	2	33	0.061	4	0.1	0.00188501
VC_2423	1	36	0.028	4	0.1	0.00188501
VC_2438	1	102	0.01	4	0	0.00188501
VC_2500	1	58	0.017	4	0.1	0.00188501
VC_2516	2	10	0.2	4	0.4	0.00188501
VC_2523	1	34	0.029	4	0.1	0.00188501
VC_2538	1	60	0.017	4	0.1	0.00188501
VC_2557	1	25	0.04	4	0.2	0.00188501
VC_2614	3	24	0.125	4	0.2	0.00188501
VC_2630	2	73	0.027	4	0.1	0.00188501
VC_2634	1	49	0.02	4	0.1	0.00188501
VC_2653	1	9	0.111	4	0.4	0.00188501
VC_2720	1	23	0.043	4	0.2	0.00188501
VC_2759	1	35	0.029	4	0.1	0.00188501
VC_A0064	1	100	0.01	4	0	0.00188501
VC_A0096	1	72	0.014	4	0.1	0.00188501	putative Zinc-dependent metalloprotease fused with Proprotein convertase P-domain
VC_A0128	1	43	0.023	4	0.1	0.00188501
VC_A0141	2	66	0.03	4	0.1	0.00188501
VC_A0303	1	30	0.033	4	0.1	0.00188501
VC_A0368	1	49	0.02	4	0.1	0.00188501
VC_A0465	1	31	0.032	4	0.1	0.00188501
VC_A0567	2	56	0.036	4	0.1	0.00188501	hypothetical protein
VC_A0646	1	73	0.014	4	0.1	0.00188501
VC_A0652	1	13	0.077	4	0.3	0.00188501
VC_A0709	1	103	0.01	4	0	0.00188501
VC_A0781	2	92	0.022	4	0	0.00188501
VC_A0929	1	36	0.028	4	0.1	0.00188501
VC_A0944	1	70	0.014	4	0.1	0.00188501
VC_A0976	1	22	0.045	4	0.2	0.00188501
IG_VC_0263	1	1	1	3	3	0.00141376
IG_VC_0503	1	61	0.016	3	0
IG_VC_0534	1	5	0.2	3	0.6
IG_VC_0856	1	12	0.083	3	0.2
IG_VC_0890	1	2	0.5	3	1.5
IG_VC_0941	1	23	0.043	3	0.1
IG_VC_1372	1	34	0.029	3	0.1
IG_VC_1900	1	14	0.071	3	0.2
IG_VC_2074	1	9	0.111	3	0.3
IG_VC_2186	1	121	0.008	3	0
IG_VC_2242	1	6	0.167	3	0.5
IG_VC_2624	1	5	0.2	3	0.6
IG_VC_A0196	1	7	0.143	3	0.4
IG_VC_A0346	2	15	0.133	3	0.2
IG_VC_A0402	1	2	0.5	3	1.5
IG_VC_A1075	1	25	0.04	3	0.1
VC_0022	1	34	0.029	3	0.1
VC_0028	1	60	0.017	3	0.1
VC_0051	1	43	0.023	3	0.1
VC_0064	1	11	0.091	3	0.3
VC_0088	2	35	0.057	3	0.1
VC_0162	1	71	0.014	3	0
VC_0164	1	136	0.007	3	0
VC_0192	1	38	0.026	3	0.1
VC_0230	1	39	0.026	3	0.1
VC_0236	1	50	0.02	3	0.1
VC_0254	1	64	0.016	3	0
VC_0275	1	35	0.029	3	0.1
VC_0293	1	27	0.037	3	0.1
VC_0311	2	15	0.133	3	0.2
VC_0385	1	71	0.014	3	0
VC_0414	1	209	0.005	3	0
VC_0433	1	63	0.016	3	0
VC_0434	1	51	0.02	3	0.1
VC_0475	1	100	0.01	3	0
VC_0492	1	90	0.011	3	0
VC_0499	1	46	0.022	3	0.1
VC_0670	1	13	0.077	3	0.2
VC_0717	1	63	0.016	3	0
VC_0736	1	44	0.023	3	0.1
VC_0757	1	42	0.024	3	0.1
VC_0817	1	56	0.018	3	0.1
VC_0872	1	12	0.083	3	0.2
VC_1064	1	28	0.036	3	0.1
VC_1111	1	50	0.02	3	0.1
VC_1207	1	52	0.019	3	0.1
VC_1210	1	34	0.029	3	0.1
VC_1224	1	39	0.026	3	0.1
VC_1285	1	39	0.026	3	0.1
VC_1440	1	12	0.083	3	0.2
VC_1451	1	589	0.002	3	0
VC_1503	1	46	0.022	3	0.1
VC_1567	1	56	0.018	3	0.1
VC_1605	1	69	0.014	3	0
VC_1618	1	56	0.018	3	0.1
VC_1639	2	56	0.036	3	0.1
VC_1692	1	86	0.012	3	0
VC_1749	1	71	0.014	3	0
VC_1756	1	38	0.026	3	0.1
VC_1765	1	169	0.006	3	0
VC_1767	1	74	0.014	3	0
VC_1784	1	129	0.008	3	0
VC_1871	1	22	0.045	3	0.1
VC_1951	1	48	0.021	3	0.1
VC_2017	2	47	0.043	3	0.1
VC_2057	2	24	0.083	3	0.1
VC_2077	1	121	0.008	3	0
VC_2305	1	53	0.019	3	0.1
VC_2404	1	55	0.018	3	0.1
VC_2488	1	33	0.03	3	0.1
VC_2515	3	12	0.25	3	0.2
VC_2556	1	16	0.062	3	0.2
VC_2652	1	7	0.143	3	0.4
VC_2656	1	66	0.015	3	0
VC_2688	1	33	0.03	3	0.1
VC_2694	2	35	0.057	3	0.1
VC_2699	1	50	0.02	3	0.1
VC_2705	1	82	0.012	3	0
VC_2773	1	47	0.021	3	0.1
VC_A0051	2	51	0.039	3	0.1
VC_A0052	1	78	0.013	3	0
VC_A0072	1	39	0.026	3	0.1
VC_A0137	1	73	0.014	3	0
VC_A0147	1	46	0.022	3	0.1
VC_A0242	1	21	0.048	3	0.1
VC_A0262	1	20	0.05	3	0.1		hypothetical protein (136 aa)
VC_A0299	1	34	0.029	3	0.1
VC_A0546	1	43	0.023	3	0.1
VC_A0590	2	47	0.043	3	0.1
VC_A0744	1	62	0.016	3	0
VC_A0927	1	17	0.059	3	0.2
VC_A1070	1	9	0.111	3	0.3
IG_VC_0020	1	15	0.067	2	0.1
IG_VC_0068	1	11	0.091	2	0.2
IG_VC_0079	1	1	1	2	2
IG_VC_0178	1	76	0.013	2	0
IG_VC_0424	1	47	0.021	2	0
IG_VC_0449	1	60	0.017	2	0
IG_VC_0490	1	69	0.014	2	0
IG_VC_0511	1	21	0.048	2	0.1
IG_VC_0538	1	30	0.033	2	0.1
IG_VC_0597	1	10	0.1	2	0.2
IG_VC_0665	2	24	0.083	2	0.1
IG_VC_0731	1	24	0.042	2	0.1
IG_VC_0758	1	17	0.059	2	0.1
IG_VC_0894	1	16	0.062	2	0.1
IG_VC_1034	1	31	0.032	2	0.1
IG_VC_1140	1	15	0.067	2	0.1
IG_VC_1292	1	20	0.05	2	0.1
IG_VC_1296	1	40	0.025	2	0.1
IG_VC_1298	1	5	0.2	2	0.4
IG_VC_1299	1	35	0.029	2	0.1
IG_VC_1326	1	1	1	2	2
IG_VC_1572	1	36	0.028	2	0.1
IG_VC_1590	1	7	0.143	2	0.3
IG_VC_1704	1	19	0.053	2	0.1
IG_VC_1845	1	34	0.029	2	0.1
IG_VC_1935	1	5	0.2	2	0.4
IG_VC_2002	1	28	0.036	2	0.1
IG_VC_2020	1	3	0.333	2	0.7
IG_VC_2042	2	34	0.059	2	0.1
IG_VC_2106	1	24	0.042	2	0.1
IG_VC_2175	1	39	0.026	2	0.1
IG_VC_2264	1	6	0.167	2	0.3
IG_VC_2323	1	14	0.071	2	0.1
IG_VC_2328	1	13	0.077	2	0.2
IG_VC_2334	1	11	0.091	2	0.2
IG_VC_2372	1	3	0.333	2	0.7
IG_VC_2416	1	40	0.025	2	0.1
IG_VC_2521	1	4	0.25	2	0.5
IG_VC_2522	1	11	0.091	2	0.2
IG_VC_2642	1	13	0.077	2	0.2
IG_VC_2709	1	9	0.111	2	0.2
IG_VC_A0047	1	5	0.2	2	0.4
IG_VC_A0161.1	1	43	0.023	2	0
IG_VC_A0178	1	17	0.059	2	0.1
IG_VC_A0383	2	58	0.034	2	0
IG_VC_A0390	1	15	0.067	2	0.1
IG_VC_A0391	2	39	0.051	2	0.1
IG_VC_A0418	2	39	0.051	2	0.1
IG_VC_A0422	1	13	0.077	2	0.2
IG_VC_A0434	1	8	0.125	2	0.2
IG_VC_A0466	2	22	0.091	2	0.1
IG_VC_A0523	1	18	0.056	2	0.1
IG_VC_A0700	1	19	0.053	2	0.1
IG_VC_A0832	1	21	0.048	2	0.1
IG_VC_A0900	1	22	0.045	2	0.1
IG_VC_A1012	1	15	0.067	2	0.1
IG_VC_A1057	1	30	0.033	2	0.1
IG_VC_A1068	1	15	0.067	2	0.1
VC_0016	1	19	0.053	2	0.1		hypothetical protein (93 aa)
VC_0018	1	25	0.04	2	0.1
VC_0033	1	42	0.024	2	0
VC_0054	1	23	0.043	2	0.1
VC_0067	1	72	0.014	2	0
VC_0072	1	88	0.011	2	0
VC_0116	1	70	0.014	2	0
VC_0124	1	12	0.083	2	0.2
VC_0145	1	12	0.083	2	0.2
VC_0185	1	90	0.011	2	0
VC_0187	1	39	0.026	2	0.1
VC_0267	1	32	0.031	2	0.1
VC_0276	1	49	0.02	2	0
VC_0291	1	35	0.029	2	0.1
VC_0299	1	26	0.038	2	0.1
VC_0397	1	24	0.042	2	0.1
VC_0411	1	34	0.029	2	0.1		conserved hypothetical protein
VC_0421	1	34	0.029	2	0.1
VC_0460	1	24	0.042	2	0.1
VC_0488	1	48	0.021	2	0
VC_0512	2	108	0.019	2	0
VC_0532	1	23	0.043	2	0.1
VC_0588	1	8	0.125	2	0.2
VC_0601	1	66	0.015	2	0
VC_0631	1	50	0.02	2	0
VC_0632	1	87	0.011	2	0
VC_0648	1	50	0.02	2	0
VC_0687	1	66	0.015	2	0
VC_0729	1	5	0.2	2	0.4
VC_0743	1	89	0.011	2	0
VC_0748	1	49	0.02	2	0
VC_0763	1	62	0.016	2	0
VC_0786	2	47	0.043	2	0
VC_0820	1	300	0.003	2	0
VC_0826	1	46	0.022	2	0
VC_0845	1	374	0.003	2	0
VC_0847	1	59	0.017	2	0
VC_0862	1	19	0.053	2	0.1
VC_0863	1	68	0.015	2	0
VC_0868	2	14	0.143	2	0.1
VC_0870	1	31	0.032	2	0.1
VC_0944	1	33	0.03	2	0.1
VC_0983	1	34	0.029	2	0.1
VC_1017	1	33	0.03	2	0.1
VC_1071	2	46	0.043	2	0
VC_1218	1	10	0.1	2	0.2
VC_1262	1	6	0.167	2	0.3		hypothetical protein (58 aa)
VC_1272	1	13	0.077	2	0.2
VC_1291	1	82	0.012	2	0
VC_1297	1	57	0.018	2	0
VC_1298	1	60	0.017	2	0
VC_1302	1	30	0.033	2	0.1
VC_1376	1	81	0.012	2	0
VC_1492	1	219	0.005	2	0
VC_1496	1	112	0.009	2	0
VC_1588	1	38	0.026	2	0.1
VC_1619.1.1	1	110	0.009	2	0
VC_1634	1	56	0.018	2	0
VC_1718	1	44	0.023	2	0
VC_1727	2	53	0.038	2	0
VC_1743	1	54	0.019	2	0
VC_1766	1	107	0.009	2	0
VC_1799	1	72	0.014	2	0
VC_1866	1	118	0.008	2	0
VC_1870	1	29	0.034	2	0.1
VC_1872	1	83	0.012	2	0
VC_1881	1	5	0.2	2	0.4
VC_1981	1	21	0.048	2	0.1
VC_1993	1	71	0.014	2	0
VC_2035	1	32	0.031	2	0.1
VC_2100	1	37	0.027	2	0.1
VC_2171	1	45	0.022	2	0
VC_2214	1	62	0.016	2	0
VC_2217	1	114	0.009	2	0
VC_2253	1	44	0.023	2	0
VC_2287	1	47	0.021	2	0
VC_2310	1	10	0.1	2	0.2
VC_2388	1	19	0.053	2	0.1
VC_2476	1	20	0.05	2	0.1
VC_2477	1	9	0.111	2	0.2
VC_2489	1	36	0.028	2	0.1
VC_2501	1	65	0.015	2	0
VC_2502	1	22	0.045	2	0.1
VC_2552	1	22	0.045	2	0.1
VC_2553	1	31	0.032	2	0.1
VC_2631	1	23	0.043	2	0.1
VC_2697	1	33	0.03	2	0.1
VC_2703	1	69	0.014	2	0
VC_2721	1	22	0.045	2	0.1
VC_2760	2	44	0.045	2	0
VC_2761	1	61	0.016	2	0
VC_2765	1	41	0.024	2	0
VC_A0076	1	69	0.014	2	0
VC_A0116	1	92	0.011	2	0
VC_A0148	1	169	0.006	2	0
VC_A0156	1	17	0.059	2	0.1
VC_A0202	1	24	0.042	2	0.1
VC_A0232	1	98	0.01	2	0
VC_A0275	1	30	0.033	2	0.1
VC_A0307	1	58	0.017	2	0
VC_A0351	1	38	0.026	2	0.1
VC_A0388	1	53	0.019	2	0
VC_A0402	1	34	0.029	2	0.1
VC_A0464	2	21	0.095	2	0.1
VC_A0493	1	30	0.033	2	0.1
VC_A0497	1	24	0.042	2	0.1
VC_A0655	1	68	0.015	2	0
VC_A0753	1	59	0.017	2	0
VC_A0754	1	40	0.025	2	0.1
VC_A0889	1	36	0.028	2	0.1
VC_A0890	1	18	0.056	2	0.1
VC_A0913	1	34	0.029	2	0.1		TonB system transport protein ExbD1
VC_A0953	1	9	0.111	2	0.2
VC_A1027	1	45	0.022	2	0
VC_A1111	1	21	0.048	2	0.1
IG_VC_0032	1	36	0.028	1	0
IG_VC_0152	1	16	0.062	1	0.1
IG_VC_0158	1	31	0.032	1	0
IG_VC_0163	1	10	0.1	1	0.1
IG_VC_0176	1	44	0.023	1	0
IG_VC_0273	1	15	0.067	1	0.1
IG_VC_0320	1	2	0.5	1	0.5
IG_VC_0443	1	5	0.2	1	0.2
IG_VC_0450	1	39	0.026	1	0
IG_VC_0595	1	6	0.167	1	0.2
IG_VC_0647	1	30	0.033	1	0
IG_VC_0681	1	6	0.167	1	0.2
IG_VC_0756	1	18	0.056	1	0.1
IG_VC_0855	1	15	0.067	1	0.1
IG_VC_0908	1	21	0.048	1	0
IG_VC_0965	1	12	0.083	1	0.1
IG_VC_0981	1	20	0.05	1	0.1
IG_VC_1038	1	11	0.091	1	0.1
IG_VC_1166	1	20	0.05	1	0.1
IG_VC_1236	1	20	0.05	1	0.1
IG_VC_1269	1	13	0.077	1	0.1
IG_VC_1539	1	35	0.029	1	0
IG_VC_1635	1	29	0.034	1	0
IG_VC_1669	1	8	0.125	1	0.1
IG_VC_2231	1	26	0.038	1	0
IG_VC_2276	1	8	0.125	1	0.1
IG_VC_2286	1	5	0.2	1	0.2
IG_VC_2287	1	17	0.059	1	0.1
IG_VC_2409	1	1	1	1	1
IG_VC_2423	1	15	0.067	1	0.1
IG_VC_2702	1	10	0.1	1	0.1
IG_VC_2718	1	5	0.2	1	0.2
IG_VC_A0015	1	15	0.067	1	0.1
IG_VC_A0076	1	22	0.045	1	0
IG_VC_A0131	1	9	0.111	1	0.1
IG_VC_A0179	1	37	0.027	1	0
IG_VC_A0254	1	24	0.042	1	0
IG_VC_A0293	1	7	0.143	1	0.1
IG_VC_A0300	1	8	0.125	1	0.1
IG_VC_A0302	1	7	0.143	1	0.1
IG_VC_A0304	1	11	0.091	1	0.1
IG_VC_A0307	1	12	0.083	1	0.1
IG_VC_A0308	1	8	0.125	1	0.1
IG_VC_A0313	1	16	0.062	1	0.1
IG_VC_A0316	1	6	0.167	1	0.2
IG_VC_A0317	1	4	0.25	1	0.2
IG_VC_A0318	1	10	0.1	1	0.1
IG_VC_A0322	1	8	0.125	1	0.1
IG_VC_A0323	1	6	0.167	1	0.2
IG_VC_A0329	1	7	0.143	1	0.1
IG_VC_A0338	1	5	0.2	1	0.2
IG_VC_A0339	1	10	0.1	1	0.1
IG_VC_A0340	1	15	0.067	1	0.1
IG_VC_A0341	1	6	0.167	1	0.2
IG_VC_A0342	1	8	0.125	1	0.1
IG_VC_A0343	1	7	0.143	1	0.1
IG_VC_A0345	1	6	0.167	1	0.2
IG_VC_A0352	1	15	0.067	1	0.1
IG_VC_A0357	1	28	0.036	1	0
IG_VC_A0358	1	12	0.083	1	0.1
IG_VC_A0365	1	7	0.143	1	0.1
IG_VC_A0374	1	6	0.167	1	0.2
IG_VC_A0376	1	12	0.083	1	0.1
IG_VC_A0381	1	10	0.1	1	0.1
IG_VC_A0387	1	14	0.071	1	0.1
IG_VC_A0389	1	14	0.071	1	0.1
IG_VC_A0396	1	10	0.1	1	0.1
IG_VC_A0398	1	5	0.2	1	0.2
IG_VC_A0401	1	7	0.143	1	0.1
IG_VC_A0403	1	7	0.143	1	0.1
IG_VC_A0404	1	13	0.077	1	0.1
IG_VC_A0405	1	17	0.059	1	0.1
IG_VC_A0406	1	7	0.143	1	0.1
IG_VC_A0407	1	13	0.077	1	0.1
IG_VC_A0408	1	7	0.143	1	0.1
IG_VC_A0410	1	8	0.125	1	0.1
IG_VC_A0413	1	9	0.111	1	0.1
IG_VC_A0415	1	6	0.167	1	0.2
IG_VC_A0417	1	17	0.059	1	0.1
IG_VC_A0425	1	13	0.077	1	0.1
IG_VC_A0426	1	8	0.125	1	0.1
IG_VC_A0429	1	17	0.059	1	0.1
IG_VC_A0433	1	8	0.125	1	0.1
IG_VC_A0437	1	12	0.083	1	0.1
IG_VC_A0439	1	13	0.077	1	0.1
IG_VC_A0446	1	22	0.045	1	0
IG_VC_A0450	1	6	0.167	1	0.2
IG_VC_A0451	1	7	0.143	1	0.1
IG_VC_A0461	1	6	0.167	1	0.2
IG_VC_A0463	1	70	0.014	1	0
IG_VC_A0465	1	8	0.125	1	0.1
IG_VC_A0467	1	21	0.048	1	0
IG_VC_A0479	1	5	0.2	1	0.2
IG_VC_A0480	1	15	0.067	1	0.1
IG_VC_A0481	1	14	0.071	1	0.1
IG_VC_A0485	1	5	0.2	1	0.2
IG_VC_A0490	1	6	0.167	1	0.2
IG_VC_A0492	1	4	0.25	1	0.2
IG_VC_A0495	1	8	0.125	1	0.1
IG_VC_A0499	1	4	0.25	1	0.2
IG_VC_A0501	1	15	0.067	1	0.1
IG_VC_A0558	1	22	0.045	1	0
IG_VC_A0604	1	18	0.056	1	0.1
IG_VC_A0673	1	5	0.2	1	0.2
IG_VC_A0735	1	16	0.062	1	0.1
IG_VC_A0869	1	30	0.033	1	0
IG_VC_A0907	1	26	0.038	1	0
IG_VC_A1006	1	8	0.125	1	0.1
IG_VC_A1035	1	9	0.111	1	0.1
VC_0023	1	15	0.067	1	0.1
VC_0065	1	27	0.037	1	0
VC_0078	1	24	0.042	1	0
VC_0083	1	34	0.029	1	0
VC_0084	1	16	0.062	1	0.1
VC_0098	1	64	0.016	1	0
VC_0140	1	19	0.053	1	0.1
VC_0142	1	18	0.056	1	0.1
VC_0144	1	32	0.031	1	0
VC_0170	1	61	0.016	1	0
VC_0175	1	108	0.009	1	0
VC_0206	1	33	0.03	1	0
VC_0226	1	6	0.167	1	0.2
VC_0235	1	49	0.02	1	0
VC_0238	1	48	0.021	1	0
VC_0258	1	70	0.014	1	0
VC_0280	1	51	0.02	1	0
VC_0281	1	86	0.012	1	0
VC_0306	1	17	0.059	1	0.1
VC_0334	1	47	0.021	1	0
VC_0378	1	23	0.043	1	0
VC_0403	1	27	0.037	1	0
VC_0431	1	29	0.034	1	0
VC_0455	1	43	0.023	1	0
VC_0458	1	10	0.1	1	0.1
VC_0574	1	76	0.013	1	0
VC_0611	1	52	0.019	1	0
VC_0613	1	87	0.011	1	0
VC_0614	1	35	0.029	1	0
VC_0616	1	37	0.027	1	0
VC_0633	1	76	0.013	1	0
VC_0635	1	12	0.083	1	0.1
VC_0662	1	56	0.018	1	0
VC_0663	1	53	0.019	1	0
VC_0690	1	30	0.033	1	0
VC_0692	1	33	0.03	1	0
VC_0697	1	25	0.04	1	0
VC_0711	1	88	0.011	1	0
VC_0720	1	50	0.02	1	0
VC_0723	1	96	0.01	1	0
VC_0767	1	58	0.017	1	0
VC_0775	1	62	0.016	1	0
VC_0781	1	46	0.022	1	0
VC_0783	1	92	0.011	1	0
VC_0795	1	69	0.014	1	0		cytS Citrate-sodium symporter
VC_0806	1	56	0.018	1	0
VC_0846	1	54	0.019	1	0
VC_0869	1	121	0.008	1	0
VC_0874	1	10	0.1	1	0.1
VC_0928	1	56	0.018	1	0
VC_0958	1	75	0.013	1	0
VC_0972	1	69	0.014	1	0
VC_0977	1	48	0.021	1	0
VC_0980	1	45	0.022	1	0
VC_0997	1	78	0.013	1	0
VC_1024	1	38	0.026	1	0
VC_1043	1	86	0.012	1	0
VC_1074	1	38	0.026	1	0
VC_1090	1	12	0.083	1	0.1
VC_1173	1	19	0.053	1	0.1
VC_1182	1	40	0.025	1	0
VC_1232	1	33	0.03	1	0
VC_1234	1	56	0.018	1	0
VC_1235	1	60	0.017	1	0
VC_1240	1	23	0.043	1	0
VC_1244	1	39	0.026	1	0
VC_1248	1	56	0.018	1	0
VC_1266	1	38	0.026	1	0
VC_1267	1	42	0.024	1	0
VC_1304	1	60	0.017	1	0
VC_1360	1	60	0.017	1	0
VC_1515	1	16	0.062	1	0.1
VC_1549	1	65	0.015	1	0
VC_1552	1	51	0.02	1	0
VC_1575	1	30	0.033	1	0
VC_1652	1	84	0.012	1	0		vieA
VC_1668	1	30	0.033	1	0
VC_1674	1	35	0.029	1	0
VC_1754	1	84	0.012	1	0
VC_1755	1	24	0.042	1	0
VC_1845	1	47	0.021	1	0
VC_1851	1	57	0.018	1	0
VC_1899	1	71	0.014	1	0
VC_1927	1	60	0.017	1	0
VC_1933	1	26	0.038	1	0
VC_1941	1	72	0.014	1	0
VC_1976	1	47	0.021	1	0
VC_2007	1	61	0.016	1	0
VC_2030	1	121	0.008	1	0
VC_2037	1	76	0.013	1	0
VC_2074	1	72	0.014	1	0
VC_2108	1	56	0.018	1	0
VC_2187	1	44	0.023	1	0
VC_2275	1	20	0.05	1	0.1
VC_2330	1	50	0.02	1	0
VC_2339	1	49	0.02	1	0
VC_2343	1	53	0.019	1	0
VC_2358	1	31	0.032	1	0
VC_2385	1	111	0.009	1	0
VC_2415	1	29	0.034	1	0
VC_2425	1	56	0.018	1	0
VC_2481	1	58	0.017	1	0
VC_2507	1	52	0.019	1	0
VC_2520	1	33	0.03	1	0
VC_2536	1	16	0.062	1	0.1
VC_2545	1	23	0.043	1	0
VC_2562	1	93	0.011	1	0
VC_2569	1	22	0.045	1	0
VC_2607	1	19	0.053	1	0.1
VC_2618	1	44	0.023	1	0
VC_2635	1	106	0.009	1	0
VC_2638	1	53	0.019	1	0
VC_2645	1	47	0.021	1	0
VC_2683	1	42	0.024	1	0
VC_2722	1	30	0.033	1	0
VC_2748	1	38	0.026	1	0
VC_2758	1	74	0.014	1	0
VC_2772	1	31	0.032	1	0
VC_A0070	1	39	0.026	1	0
VC_A0105	1	10	0.1	1	0.1
VC_A0115	1	30	0.033	1	0
VC_A0146	1	78	0.013	1	0
VC_A0184	1	6	0.167	1	0.2		Cold shock protein CapB
VC_A0198	1	75	0.013	1	0
VC_A0199	1	163	0.006	1	0
VC_A0211	1	90	0.011	1	0
VC_A0267	1	78	0.013	1	0
VC_A0277	1	12	0.083	1	0.1
VC_A0282	1	29	0.034	1	0
VC_A0359	1	13	0.077	1	0.1
VC_A0360	1	27	0.037	1	0
VC_A0367	1	72	0.014	1	0
VC_A0376	1	29	0.034	1	0
VC_A0377	1	5	0.2	1	0.2
VC_A0379	1	29	0.034	1	0
VC_A0380	1	30	0.033	1	0
VC_A0395	1	49	0.02	1	0
VC_A0397	1	36	0.028	1	0
VC_A0420	1	17	0.059	1	0.1
VC_A0424	1	19	0.053	1	0.1
VC_A0468	1	17	0.059	1	0.1
VC_A0472	1	29	0.034	1	0
VC_A0502	1	8	0.125	1	0.1
VC_A0557	1	78	0.013	1	0
VC_A0630	1	34	0.029	1	0
VC_A0676	1	12	0.083	1	0.1
VC_A0732	1	15	0.067	1	0.1
VC_A0773	1	43	0.023	1	0
VC_A0813	1	65	0.015	1	0
VC_A0821	1	8	0.125	1	0.1		hypothetical protein (68 aa)
VC_A0846	1	37	0.027	1	0
VC_A0873	1	71	0.014	1	0
VC_A0884	1	64	0.016	1	0		conserved hypothetical protein
VC_A0896	1	63	0.016	1	0
VC_A0916	1	4	0.25	1	0.2
VC_A0935	1	21	0.048	1	0
VC_A0957	1	26	0.038	1	0
VC_A0962	1	65	0.015	1	0
VC_A0963	1	54	0.019	1	0
VC_A0985	1	99	0.01	1	0
VC_A0990	1	47	0.021	1	0
VC_A1016	1	15	0.067	1	0.1
VC_A1026	1	52	0.019	1	0
VC_A1056	1	115	0.009	1	0
VC_A1062	1	59	0.017	1	0
VC_A1063	1	89	0.011	1	0
IG_1	0	24	0	0	0
IG_VC_0003	0	1	0	0	0
IG_VC_0004	0	3	0	0	0
IG_VC_0007	0	1	0	0	0
IG_VC_0008	0	10	0	0	0
IG_VC_0010	0	6	0	0	0
IG_VC_0011	0	16	0	0	0
IG_VC_0012	0	3	0	0	0
IG_VC_0013	0	5	0	0	0
IG_VC_0014	0	3	0	0	0
IG_VC_0015	0	1	0	0	0
IG_VC_0016	0	19	0	0	0
IG_VC_0018	0	18	0	0	0
IG_VC_0019	0	3	0	0	0
IG_VC_0022	0	14	0	0	0
IG_VC_0023	0	8	0	0	0
IG_VC_0024	0	5	0	0	0
IG_VC_0025	0	11	0	0	0
IG_VC_0026	0	8	0	0	0
IG_VC_0027	0	14	0	0	0
IG_VC_0033	0	6	0	0	0
IG_VC_0034	0	2	0	0	0
IG_VC_0035	0	1	0	0	0
IG_VC_0037	0	24	0	0	0
IG_VC_0038	0	6	0	0	0
IG_VC_0039	0	17	0	0	0
IG_VC_0040	0	5	0	0	0
IG_VC_0041	0	2	0	0	0
IG_VC_0045	0	3	0	0	0
IG_VC_0046	0	2	0	0	0
IG_VC_0047	0	4	0	0	0
IG_VC_0049	0	1	0	0	0
IG_VC_0051	0	6	0	0	0
IG_VC_0056	0	3	0	0	0
IG_VC_0061	0	20	0	0	0
IG_VC_0067	0	12	0	0	0
IG_VC_0069	0	4	0	0	0
IG_VC_0070	0	8	0	0	0
IG_VC_0071	0	8	0	0	0
IG_VC_0072	0	5	0	0	0
IG_VC_0074	0	5	0	0	0
IG_VC_0075	0	2	0	0	0
IG_VC_0076	0	3	0	0	0
IG_VC_0077	0	4	0	0	0
IG_VC_0078	0	1	0	0	0
IG_VC_0080	0	6	0	0	0
IG_VC_0082	0	8	0	0	0
IG_VC_0083	0	1	0	0	0
IG_VC_0084	0	1	0	0	0
IG_VC_0086	0	3	0	0	0
IG_VC_0088	0	7	0	0	0
IG_VC_0089	0	20	0	0	0
IG_VC_0090	0	7	0	0	0
IG_VC_0091	0	5	0	0	0
IG_VC_0092	0	1	0	0	0
IG_VC_0093	0	12	0	0	0
IG_VC_0094	0	2	0	0	0
IG_VC_0096	0	2	0	0	0
IG_VC_0097	0	5	0	0	0
IG_VC_0098	0	3	0	0	0
IG_VC_0099	0	16	0	0	0
IG_VC_0100	0	1	0	0	0
IG_VC_0101	0	6	0	0	0
IG_VC_0102	0	7	0	0	0
IG_VC_0103	0	9	0	0	0
IG_VC_0104	0	2	0	0	0
IG_VC_0106	0	7	0	0	0
IG_VC_0107	0	30	0	0	0
IG_VC_0108	0	6	0	0	0
IG_VC_0110	0	17	0	0	0
IG_VC_0111	0	16	0	0	0
IG_VC_0112	0	8	0	0	0
IG_VC_0113	0	10	0	0	0
IG_VC_0116	0	3	0	0	0
IG_VC_0117	0	1	0	0	0
IG_VC_0120	0	4	0	0	0
IG_VC_0121	0	11	0	0	0
IG_VC_0123	0	6	0	0	0
IG_VC_0125	0	3	0	0	0
IG_VC_0130	0	9	0	0	0
IG_VC_0131	0	2	0	0	0
IG_VC_0134	0	3	0	0	0
IG_VC_0135	0	5	0	0	0
IG_VC_0136	0	2	0	0	0
IG_VC_0138	0	1	0	0	0
IG_VC_0139	0	4	0	0	0
IG_VC_0140	0	16	0	0	0
IG_VC_0141	0	4	0	0	0
IG_VC_0142	0	3	0	0	0
IG_VC_0143	0	42	0	0	0
IG_VC_0144	0	12	0	0	0
IG_VC_0145	0	3	0	0	0
IG_VC_0147	0	13	0	0	0
IG_VC_0150	0	6	0	0	0
IG_VC_0151	0	16	0	0	0
IG_VC_0153	0	2	0	0	0
IG_VC_0154	0	1	0	0	0
IG_VC_0157	0	4	0	0	0
IG_VC_0160	0	26	0	0	0
IG_VC_0162	0	11	0	0	0
IG_VC_0164	0	9	0	0	0
IG_VC_0168	0	5	0	0	0
IG_VC_0169	0	88	0	0	0
IG_VC_0170	0	5	0	0	0
IG_VC_0171	0	1	0	0	0
IG_VC_0172	0	4	0	0	0
IG_VC_0174	0	11	0	0	0
IG_VC_0175	0	18	0	0	0
IG_VC_0177	0	13	0	0	0
IG_VC_0179	0	1	0	0	0
IG_VC_0182	0	3	0	0	0
IG_VC_0186	0	8	0	0	0
IG_VC_0187	0	5	0	0	0
IG_VC_0188	0	22	0	0	0
IG_VC_0189	0	2	0	0	0
IG_VC_0191	0	29	0	0	0
IG_VC_0192	0	3	0	0	0
IG_VC_0193	0	4	0	0	0
IG_VC_0194	0	1	0	0	0
IG_VC_0195	0	12	0	0	0
IG_VC_0198	0	13	0	0	0
IG_VC_0199	0	1	0	0	0
IG_VC_0200	0	7	0	0	0
IG_VC_0201	0	1	0	0	0
IG_VC_0205	0	5	0	0	0
IG_VC_0208	0	6	0	0	0
IG_VC_0209	0	6	0	0	0
IG_VC_0210	0	7	0	0	0
IG_VC_0211	0	20	0	0	0
IG_VC_0212	0	5	0	0	0
IG_VC_0215	0	6	0	0	0
IG_VC_0216	0	8	0	0	0
IG_VC_0217	0	4	0	0	0
IG_VC_0220	0	15	0	0	0
IG_VC_0222	0	5	0	0	0
IG_VC_0223	0	6	0	0	0
IG_VC_0224	0	5	0	0	0
IG_VC_0225	0	5	0	0	0
IG_VC_0228	0	1	0	0	0
IG_VC_0229	0	1	0	0	0
IG_VC_0239	0	1	0	0	0
IG_VC_0240	0	13	0	0	0
IG_VC_0244	0	1	0	0	0
IG_VC_0248	0	6	0	0	0
IG_VC_0249	0	2	0	0	0
IG_VC_0252	0	5	0	0	0
IG_VC_0253	0	11	0	0	0
IG_VC_0254	0	18	0	0	0
IG_VC_0255	0	13	0	0	0
IG_VC_0256	0	1	0	0	0
IG_VC_0259	0	5	0	0	0
IG_VC_0264	0	6	0	0	0
IG_VC_0265	0	12	0	0	0
IG_VC_0266	0	5	0	0	0
IG_VC_0269	0	29	0	0	0
IG_VC_0271	0	24	0	0	0
IG_VC_0275	0	6	0	0	0
IG_VC_0276	0	3	0	0	0
IG_VC_0277	0	15	0	0	0
IG_VC_0278	0	18	0	0	0
IG_VC_0279	0	21	0	0	0
IG_VC_0280	0	10	0	0	0
IG_VC_0281	0	1	0	0	0
IG_VC_0282	0	5	0	0	0
IG_VC_0283	0	6	0	0	0
IG_VC_0285	0	14	0	0	0
IG_VC_0286	0	1	0	0	0
IG_VC_0287	0	15	0	0	0
IG_VC_0289	0	3	0	0	0
IG_VC_0290	0	12	0	0	0
IG_VC_0291	0	2	0	0	0
IG_VC_0293	0	4	0	0	0
IG_VC_0295	0	7	0	0	0
IG_VC_0298	0	21	0	0	0
IG_VC_0299	0	7	0	0	0
IG_VC_0302	0	6	0	0	0
IG_VC_0303	0	2	0	0	0
IG_VC_0304	0	12	0	0	0
IG_VC_0307	0	19	0	0	0
IG_VC_0308	0	5	0	0	0
IG_VC_0309	0	7	0	0	0
IG_VC_0313	0	15	0	0	0
IG_VC_0314	0	4	0	0	0
IG_VC_0318	0	2	0	0	0
IG_VC_0321	0	34	0	0	0
IG_VC_0322	0	10	0	0	0
IG_VC_0323	0	3	0	0	0
IG_VC_0324	0	10	0	0	0
IG_VC_0325	0	1	0	0	0
IG_VC_0326	0	20	0	0	0
IG_VC_0327	0	6	0	0	0
IG_VC_0328	0	10	0	0	0
IG_VC_0329	0	6	0	0	0
IG_VC_0330	0	6	0	0	0
IG_VC_0331	0	11	0	0	0
IG_VC_0332	0	17	0	0	0
IG_VC_0333	0	1	0	0	0
IG_VC_0334	0	4	0	0	0
IG_VC_0336	0	8	0	0	0
IG_VC_0337	0	13	0	0	0
IG_VC_0338	0	2	0	0	0
IG_VC_0339	0	9	0	0	0
IG_VC_0341	0	15	0	0	0
IG_VC_0343	0	7	0	0	0
IG_VC_0348	0	2	0	0	0
IG_VC_0349	0	5	0	0	0
IG_VC_0351	0	4	0	0	0
IG_VC_0352	0	2	0	0	0
IG_VC_0354	0	8	0	0	0
IG_VC_0355	0	12	0	0	0
IG_VC_0358	0	1	0	0	0
IG_VC_0359	0	14	0	0	0
IG_VC_0360	0	8	0	0	0
IG_VC_0361	0	6	0	0	0
IG_VC_0362	0	9	0	0	0
IG_VC_0363	0	8	0	0	0
IG_VC_0364	0	6	0	0	0
IG_VC_0365	0	6	0	0	0
IG_VC_0366	0	15	0	0	0
IG_VC_0368	0	1	0	0	0
IG_VC_0369	0	3	0	0	0
IG_VC_0370	0	4	0	0	0
IG_VC_0371	0	9	0	0	0
IG_VC_0373	0	1	0	0	0
IG_VC_0374	0	20	0	0	0
IG_VC_0375	0	3	0	0	0
IG_VC_0376	0	5	0	0	0
IG_VC_0377	0	3	0	0	0
IG_VC_0379	0	25	0	0	0
IG_VC_0381	0	6	0	0	0
IG_VC_0384	0	8	0	0	0
IG_VC_0387	0	12	0	0	0
IG_VC_0388	0	4	0	0	0
IG_VC_0390	0	10	0	0	0
IG_VC_0391	0	3	0	0	0
IG_VC_0392	0	17	0	0	0
IG_VC_0393	0	6	0	0	0
IG_VC_0394	0	3	0	0	0
IG_VC_0395	0	11	0	0	0
IG_VC_0396	0	7	0	0	0
IG_VC_0398	0	11	0	0	0
IG_VC_0399	0	1	0	0	0
IG_VC_0402	0	2	0	0	0
IG_VC_0403	0	1	0	0	0
IG_VC_0407	0	1	0	0	0
IG_VC_0408	0	9	0	0	0
IG_VC_0409	0	1	0	0	0
IG_VC_0410	0	5	0	0	0
IG_VC_0415	0	7	0	0	0
IG_VC_0416	0	4	0	0	0
IG_VC_0419	0	1	0	0	0
IG_VC_0420	0	1	0	0	0
IG_VC_0423	0	4	0	0	0
IG_VC_0425	0	10	0	0	0
IG_VC_0426	0	1	0	0	0
IG_VC_0431	0	25	0	0	0
IG_VC_0432	0	10	0	0	0
IG_VC_0433	0	32	0	0	0
IG_VC_0434	0	8	0	0	0
IG_VC_0435	0	17	0	0	0
IG_VC_0436	0	2	0	0	0
IG_VC_0437	0	15	0	0	0
IG_VC_0438	0	3	0	0	0
IG_VC_0440	0	1	0	0	0
IG_VC_0441	0	7	0	0	0
IG_VC_0446	0	5	0	0	0
IG_VC_0447	0	8	0	0	0
IG_VC_0453	0	13	0	0	0
IG_VC_0454	0	4	0	0	0
IG_VC_0455	0	12	0	0	0
IG_VC_0457	0	3	0	0	0
IG_VC_0460	0	2	0	0	0
IG_VC_0461	0	2	0	0	0
IG_VC_0462	0	3	0	0	0
IG_VC_0463	0	2	0	0	0
IG_VC_0464	0	5	0	0	0
IG_VC_0465	0	5	0	0	0
IG_VC_0466	0	1	0	0	0
IG_VC_0467	0	5	0	0	0
IG_VC_0469	0	1	0	0	0
IG_VC_0470	0	9	0	0	0
IG_VC_0471	0	10	0	0	0
IG_VC_0472	0	8	0	0	0
IG_VC_0473	0	24	0	0	0
IG_VC_0474	0	4	0	0	0
IG_VC_0475	0	16	0	0	0
IG_VC_0476	0	2	0	0	0
IG_VC_0477	0	8	0	0	0
IG_VC_0478	0	7	0	0	0
IG_VC_0479	0	14	0	0	0
IG_VC_0480	0	1	0	0	0
IG_VC_0481	0	7	0	0	0
IG_VC_0482	0	17	0	0	0
IG_VC_0483	0	5	0	0	0
IG_VC_0484	0	28	0	0	0
IG_VC_0485	0	4	0	0	0
IG_VC_0486	0	27	0	0	0
IG_VC_0487	0	8	0	0	0
IG_VC_0488	0	4	0	0	0
IG_VC_0489	0	14	0	0	0
IG_VC_0493	0	18	0	0	0
IG_VC_0495	0	4	0	0	0
IG_VC_0496	0	5	0	0	0
IG_VC_0497	0	5	0	0	0
IG_VC_0498	0	4	0	0	0
IG_VC_0499	0	7	0	0	0
IG_VC_0500	0	2	0	0	0
IG_VC_0501	0	37	0	0	0
IG_VC_0502	0	34	0	0	0
IG_VC_0504	0	18	0	0	0
IG_VC_0505	0	4	0	0	0
IG_VC_0506	0	1	0	0	0
IG_VC_0507	0	7	0	0	0
IG_VC_0509	0	2	0	0	0
IG_VC_0513	0	146	0	0	0
IG_VC_0515	0	13	0	0	0
IG_VC_0516	0	53	0	0	0
IG_VC_0517	0	33	0	0	0
IG_VC_0518	0	9	0	0	0
IG_VC_0519	0	1	0	0	0
IG_VC_0520	0	3	0	0	0
IG_VC_0521	0	11	0	0	0
IG_VC_0522	0	12	0	0	0
IG_VC_0523	0	1	0	0	0
IG_VC_0524	0	12	0	0	0
IG_VC_0527	0	5	0	0	0
IG_VC_0530	0	3	0	0	0
IG_VC_0535	0	4	0	0	0
IG_VC_0536	0	1	0	0	0
IG_VC_0537	0	6	0	0	0
IG_VC_0539	0	4	0	0	0
IG_VC_0540	0	1	0	0	0
IG_VC_0542	0	10	0	0	0
IG_VC_0544	0	3	0	0	0
IG_VC_0545	0	10	0	0	0
IG_VC_0546	0	4	0	0	0
IG_VC_0547	0	2	0	0	0
IG_VC_0548	0	7	0	0	0
IG_VC_0549	0	93	0	0	0
IG_VC_0550	0	3	0	0	0
IG_VC_0552	0	2	0	0	0
IG_VC_0556	0	3	0	0	0
IG_VC_0557	0	3	0	0	0
IG_VC_0558	0	4	0	0	0
IG_VC_0559	0	4	0	0	0
IG_VC_0560	0	19	0	0	0
IG_VC_0561	0	12	0	0	0
IG_VC_0562	0	7	0	0	0
IG_VC_0563	0	2	0	0	0
IG_VC_0564	0	7	0	0	0
IG_VC_0565	0	4	0	0	0
IG_VC_0566	0	10	0	0	0
IG_VC_0567	0	7	0	0	0
IG_VC_0568	0	14	0	0	0
IG_VC_0570	0	7	0	0	0
IG_VC_0573	0	14	0	0	0
IG_VC_0576	0	7	0	0	0
IG_VC_0578	0	2	0	0	0
IG_VC_0583	0	11	0	0	0
IG_VC_0586	0	2	0	0	0
IG_VC_0587	0	14	0	0	0
IG_VC_0588	0	7	0	0	0
IG_VC_0589	0	9	0	0	0
IG_VC_0591	0	2	0	0	0
IG_VC_0592	0	1	0	0	0
IG_VC_0596	0	1	0	0	0
IG_VC_0599	0	1	0	0	0
IG_VC_0603	0	11	0	0	0
IG_VC_0604	0	12	0	0	0
IG_VC_0605	0	8	0	0	0
IG_VC_0606	0	11	0	0	0
IG_VC_0608	0	7	0	0	0
IG_VC_0609	0	10	0	0	0
IG_VC_0611	0	4	0	0	0
IG_VC_0612	0	7	0	0	0
IG_VC_0613	0	6	0	0	0
IG_VC_0616	0	2	0	0	0
IG_VC_0617	0	2	0	0	0
IG_VC_0620	0	8	0	0	0
IG_VC_0621	0	38	0	0	0
IG_VC_0623	0	3	0	0	0
IG_VC_0624	0	2	0	0	0
IG_VC_0625	0	3	0	0	0
IG_VC_0626	0	1	0	0	0
IG_VC_0627	0	18	0	0	0
IG_VC_0628	0	8	0	0	0
IG_VC_0630	0	5	0	0	0
IG_VC_0632	0	5	0	0	0
IG_VC_0633	0	4	0	0	0
IG_VC_0634	0	37	0	0	0
IG_VC_0635	0	3	0	0	0
IG_VC_0636	0	14	0	0	0
IG_VC_0637	0	16	0	0	0
IG_VC_0638	0	5	0	0	0
IG_VC_0639	0	2	0	0	0
IG_VC_0640	0	14	0	0	0
IG_VC_0642	0	1	0	0	0
IG_VC_0644	0	6	0	0	0
IG_VC_0646	0	8	0	0	0
IG_VC_0648	0	8	0	0	0
IG_VC_0649	0	6	0	0	0
IG_VC_0650	0	9	0	0	0
IG_VC_0651	0	2	0	0	0
IG_VC_0653	0	6	0	0	0
IG_VC_0656	0	6	0	0	0
IG_VC_0659	0	14	0	0	0
IG_VC_0660	0	8	0	0	0
IG_VC_0661	0	7	0	0	0
IG_VC_0662	0	28	0	0	0
IG_VC_0663	0	15	0	0	0
IG_VC_0664	0	2	0	0	0
IG_VC_0666	0	33	0	0	0
IG_VC_0667	0	1	0	0	0
IG_VC_0668	0	7	0	0	0
IG_VC_0669	0	20	0	0	0
IG_VC_0674	0	4	0	0	0
IG_VC_0675	0	2	0	0	0
IG_VC_0676	0	7	0	0	0
IG_VC_0677	0	31	0	0	0
IG_VC_0678	0	13	0	0	0
IG_VC_0679	0	4	0	0	0
IG_VC_0680	0	15	0	0	0
IG_VC_0682	0	3	0	0	0
IG_VC_0683	0	2	0	0	0
IG_VC_0684	0	10	0	0	0
IG_VC_0685	0	4	0	0	0
IG_VC_0688	0	17	0	0	0
IG_VC_0689	0	1	0	0	0
IG_VC_0690	0	1	0	0	0
IG_VC_0691	0	1	0	0	0
IG_VC_0692	0	5	0	0	0
IG_VC_0693	0	2	0	0	0
IG_VC_0694	0	1	0	0	0
IG_VC_0695	0	20	0	0	0
IG_VC_0696	0	1	0	0	0
IG_VC_0697	0	1	0	0	0
IG_VC_0698	0	5	0	0	0
IG_VC_0699	0	12	0	0	0
IG_VC_0700	0	8	0	0	0
IG_VC_0702	0	2	0	0	0
IG_VC_0705	0	14	0	0	0
IG_VC_0706	0	15	0	0	0
IG_VC_0707	0	19	0	0	0
IG_VC_0711	0	8	0	0	0
IG_VC_0712	0	16	0	0	0
IG_VC_0716	0	1	0	0	0
IG_VC_0718	0	7	0	0	0
IG_VC_0719	0	13	0	0	0
IG_VC_0720	0	2	0	0	0
IG_VC_0722	0	1	0	0	0
IG_VC_0724	0	17	0	0	0
IG_VC_0725	0	1	0	0	0
IG_VC_0726	0	1	0	0	0
IG_VC_0727	0	3	0	0	0
IG_VC_0728	0	2	0	0	0
IG_VC_0729	0	3	0	0	0
IG_VC_0730	0	3	0	0	0
IG_VC_0732	0	20	0	0	0
IG_VC_0733	0	20	0	0	0
IG_VC_0734	0	17	0	0	0
IG_VC_0736	0	4	0	0	0
IG_VC_0737	0	7	0	0	0
IG_VC_0738	0	6	0	0	0
IG_VC_0739	0	5	0	0	0
IG_VC_0742	0	5	0	0	0
IG_VC_0743	0	1	0	0	0
IG_VC_0744	0	2	0	0	0
IG_VC_0745	0	11	0	0	0
IG_VC_0746	0	7	0	0	0
IG_VC_0747	0	9	0	0	0
IG_VC_0748	0	2	0	0	0
IG_VC_0749	0	3	0	0	0
IG_VC_0750	0	4	0	0	0
IG_VC_0751	0	2	0	0	0
IG_VC_0754	0	4	0	0	0
IG_VC_0755	0	8	0	0	0
IG_VC_0757	0	11	0	0	0
IG_VC_0760	0	3	0	0	0
IG_VC_0761	0	2	0	0	0
IG_VC_0763	0	16	0	0	0
IG_VC_0764	0	3	0	0	0
IG_VC_0765	0	25	0	0	0
IG_VC_0767	0	16	0	0	0
IG_VC_0768	0	7	0	0	0
IG_VC_0769	0	20	0	0	0
IG_VC_0770	0	15	0	0	0
IG_VC_0772	0	6	0	0	0
IG_VC_0773	0	1	0	0	0
IG_VC_0774	0	10	0	0	0
IG_VC_0776	0	13	0	0	0
IG_VC_0779	0	4	0	0	0
IG_VC_0781	0	2	0	0	0
IG_VC_0783	0	9	0	0	0
IG_VC_0784	0	5	0	0	0
IG_VC_0785	0	23	0	0	0
IG_VC_0787	0	7	0	0	0
IG_VC_0788	0	9	0	0	0
IG_VC_0789	0	11	0	0	0
IG_VC_0792	0	6	0	0	0
IG_VC_0795	0	4	0	0	0
IG_VC_0796	0	27	0	0	0
IG_VC_0797	0	4	0	0	0
IG_VC_0802	0	30	0	0	0
IG_VC_0803	0	3	0	0	0
IG_VC_0804	0	12	0	0	0
IG_VC_0805	0	4	0	0	0
IG_VC_0806	0	4	0	0	0
IG_VC_0807	0	1	0	0	0
IG_VC_0810	0	16	0	0	0
IG_VC_0811	0	37	0	0	0
IG_VC_0812	0	11	0	0	0
IG_VC_0814	0	28	0	0	0
IG_VC_0816	0	15	0	0	0
IG_VC_0817	0	30	0	0	0
IG_VC_0818	0	3	0	0	0
IG_VC_0819	0	39	0	0	0
IG_VC_0820	0	9	0	0	0
IG_VC_0821	0	16	0	0	0
IG_VC_0822	0	13	0	0	0
IG_VC_0824	0	16	0	0	0
IG_VC_0825	0	24	0	0	0
IG_VC_0826	0	53	0	0	0
IG_VC_0829	0	11	0	0	0
IG_VC_0831	0	1	0	0	0
IG_VC_0834	0	1	0	0	0
IG_VC_0837	0	2	0	0	0
IG_VC_0838	0	28	0	0	0
IG_VC_0840	0	1	0	0	0
IG_VC_0841	0	1	0	0	0
IG_VC_0842	0	2	0	0	0
IG_VC_0843	0	2	0	0	0
IG_VC_0845	0	21	0	0	0
IG_VC_0846	0	69	0	0	0
IG_VC_0847	0	41	0	0	0
IG_VC_0848	0	41	0	0	0
IG_VC_0849	0	9	0	0	0
IG_VC_0851	0	1	0	0	0
IG_VC_0852	0	3	0	0	0
IG_VC_0853	0	13	0	0	0
IG_VC_0854	0	7	0	0	0
IG_VC_0857	0	1	0	0	0
IG_VC_0858	0	6	0	0	0
IG_VC_0862	0	1	0	0	0
IG_VC_0864	0	3	0	0	0
IG_VC_0865	0	2	0	0	0
IG_VC_0866	0	12	0	0	0
IG_VC_0870	0	10	0	0	0
IG_VC_0871	0	7	0	0	0
IG_VC_0873	0	6	0	0	0
IG_VC_0874	0	2	0	0	0
IG_VC_0877	0	2	0	0	0
IG_VC_0878	0	1	0	0	0
IG_VC_0880	0	14	0	0	0
IG_VC_0881	0	3	0	0	0
IG_VC_0883	0	28	0	0	0
IG_VC_0884	0	2	0	0	0
IG_VC_0887	0	7	0	0	0
IG_VC_0889	0	3	0	0	0
IG_VC_0892	0	21	0	0	0
IG_VC_0893	0	1	0	0	0
IG_VC_0895	0	15	0	0	0
IG_VC_0896	0	13	0	0	0
IG_VC_0897	0	2	0	0	0
IG_VC_0898	0	1	0	0	0
IG_VC_0899	0	1	0	0	0
IG_VC_0900	0	22	0	0	0
IG_VC_0902	0	2	0	0	0
IG_VC_0903	0	2	0	0	0
IG_VC_0905	0	7	0	0	0
IG_VC_0909	0	4	0	0	0
IG_VC_0910	0	14	0	0	0
IG_VC_0911	0	5	0	0	0
IG_VC_0912	0	25	0	0	0
IG_VC_0913	0	14	0	0	0
IG_VC_0915	0	4	0	0	0
IG_VC_0916	0	34	0	0	0
IG_VC_0923	0	1	0	0	0
IG_VC_0928	0	20	0	0	0
IG_VC_0929	0	23	0	0	0
IG_VC_0930	0	20	0	0	0
IG_VC_0931	0	8	0	0	0
IG_VC_0932	0	11	0	0	0
IG_VC_0934	0	53	0	0	0
IG_VC_0935	0	6	0	0	0
IG_VC_0937	0	3	0	0	0
IG_VC_0940	0	13	0	0	0
IG_VC_0942	0	7	0	0	0
IG_VC_0943	0	8	0	0	0
IG_VC_0945	0	17	0	0	0
IG_VC_0948	0	7	0	0	0
IG_VC_0953	0	5	0	0	0
IG_VC_0956	0	2	0	0	0
IG_VC_0958	0	4	0	0	0
IG_VC_0959	0	4	0	0	0
IG_VC_0960	0	8	0	0	0
IG_VC_0962	0	5	0	0	0
IG_VC_0963	0	18	0	0	0
IG_VC_0964	0	7	0	0	0
IG_VC_0966	0	8	0	0	0
IG_VC_0967	0	9	0	0	0
IG_VC_0968	0	1	0	0	0
IG_VC_0969	0	11	0	0	0
IG_VC_0970	0	12	0	0	0
IG_VC_0971	0	12	0	0	0
IG_VC_0972	0	48	0	0	0
IG_VC_0973	0	5	0	0	0
IG_VC_0974	0	2	0	0	0
IG_VC_0975	0	3	0	0	0
IG_VC_0977	0	35	0	0	0
IG_VC_0978	0	9	0	0	0
IG_VC_0979	0	7	0	0	0
IG_VC_0980	0	4	0	0	0
IG_VC_0982	0	3	0	0	0
IG_VC_0983	0	3	0	0	0
IG_VC_0985	0	13	0	0	0
IG_VC_0986	0	23	0	0	0
IG_VC_0987	0	10	0	0	0
IG_VC_0988	0	4	0	0	0
IG_VC_0989	0	18	0	0	0
IG_VC_0990	0	3	0	0	0
IG_VC_0991	0	8	0	0	0
IG_VC_0992	0	14	0	0	0
IG_VC_0993	0	14	0	0	0
IG_VC_0994	0	1	0	0	0
IG_VC_0995	0	35	0	0	0
IG_VC_0996	0	10	0	0	0
IG_VC_0997	0	2	0	0	0
IG_VC_0998	0	7	0	0	0
IG_VC_0999	0	9	0	0	0
IG_VC_1000	0	11	0	0	0
IG_VC_1001	0	6	0	0	0
IG_VC_1003	0	3	0	0	0
IG_VC_1004	0	1	0	0	0
IG_VC_1005	0	4	0	0	0
IG_VC_1006	0	4	0	0	0
IG_VC_1007	0	2	0	0	0
IG_VC_1008	0	5	0	0	0
IG_VC_1009	0	2	0	0	0
IG_VC_1010	0	8	0	0	0
IG_VC_1012	0	1	0	0	0
IG_VC_1018	0	52	0	0	0
IG_VC_1021	0	22	0	0	0		luxO
IG_VC_1024	0	26	0	0	0
IG_VC_1025	0	3	0	0	0
IG_VC_1028	0	1	0	0	0
IG_VC_1029	0	2	0	0	0
IG_VC_1030	0	7	0	0	0
IG_VC_1031	0	2	0	0	0
IG_VC_1035	0	5	0	0	0
IG_VC_1036	0	12	0	0	0
IG_VC_1039	0	4	0	0	0
IG_VC_1040	0	5	0	0	0
IG_VC_1041	0	5	0	0	0
IG_VC_1042	0	1	0	0	0
IG_VC_1043	0	25	0	0	0
IG_VC_1044	0	19	0	0	0
IG_VC_1046	0	22	0	0	0
IG_VC_1049	0	7	0	0	0
IG_VC_1050	0	20	0	0	0
IG_VC_1051	0	13	0	0	0
IG_VC_1053	0	5	0	0	0
IG_VC_1054	0	1	0	0	0
IG_VC_1055	0	2	0	0	0
IG_VC_1056	0	1	0	0	0
IG_VC_1057	0	6	0	0	0
IG_VC_1058	0	9	0	0	0
IG_VC_1059	0	3	0	0	0
IG_VC_1060	0	9	0	0	0
IG_VC_1061	0	6	0	0	0
IG_VC_1062	0	4	0	0	0
IG_VC_1064	0	10	0	0	0
IG_VC_1065	0	3	0	0	0
IG_VC_1066	0	5	0	0	0
IG_VC_1067	0	8	0	0	0
IG_VC_1068	0	31	0	0	0
IG_VC_1069	0	6	0	0	0
IG_VC_1070	0	2	0	0	0
IG_VC_1071	0	2	0	0	0
IG_VC_1072	0	12	0	0	0
IG_VC_1073	0	23	0	0	0
IG_VC_1074	0	5	0	0	0
IG_VC_1075	0	19	0	0	0
IG_VC_1076	0	1	0	0	0
IG_VC_1078	0	5	0	0	0
IG_VC_1079	0	2	0	0	0
IG_VC_1080	0	20	0	0	0
IG_VC_1082	0	3	0	0	0
IG_VC_1084	0	2	0	0	0
IG_VC_1085	0	1	0	0	0
IG_VC_1087	0	2	0	0	0
IG_VC_1088	0	1	0	0	0
IG_VC_1090	0	3	0	0	0
IG_VC_1091	0	34	0	0	0
IG_VC_1092	0	8	0	0	0
IG_VC_1093	0	3	0	0	0
IG_VC_1094	0	1	0	0	0
IG_VC_1096	0	6	0	0	0
IG_VC_1097	0	8	0	0	0
IG_VC_1098	0	12	0	0	0
IG_VC_1099	0	22	0	0	0
IG_VC_1100	0	7	0	0	0
IG_VC_1101	0	38	0	0	0
IG_VC_1102	0	6	0	0	0
IG_VC_1104	0	11	0	0	0
IG_VC_1105	0	2	0	0	0
IG_VC_1106	0	11	0	0	0
IG_VC_1107	0	7	0	0	0
IG_VC_1110	0	1	0	0	0
IG_VC_1111	0	4	0	0	0
IG_VC_1112	0	14	0	0	0
IG_VC_1116	0	5	0	0	0
IG_VC_1117	0	16	0	0	0
IG_VC_1118	0	19	0	0	0
IG_VC_1120	0	1	0	0	0
IG_VC_1126	0	6	0	0	0
IG_VC_1127	0	4	0	0	0
IG_VC_1128	0	2	0	0	0
IG_VC_1129	0	15	0	0	0
IG_VC_1130	0	2	0	0	0		H-NS
IG_VC_1131	0	62	0	0	0
IG_VC_1131.1	0	14	0	0	0
IG_VC_1132	0	7	0	0	0
IG_VC_1134	0	1	0	0	0
IG_VC_1135	0	1	0	0	0
IG_VC_1137	0	1	0	0	0
IG_VC_1141	0	3	0	0	0
IG_VC_1142	0	4	0	0	0
IG_VC_1144	0	2	0	0	0
IG_VC_1145	0	3	0	0	0
IG_VC_1146	0	14	0	0	0
IG_VC_1147	0	14	0	0	0
IG_VC_1148	0	4	0	0	0
IG_VC_1149	0	18	0	0	0
IG_VC_1150	0	4	0	0	0
IG_VC_1151	0	8	0	0	0
IG_VC_1152	0	1	0	0	0
IG_VC_1153	0	30	0	0	0
IG_VC_1154	0	8	0	0	0
IG_VC_1155	0	13	0	0	0
IG_VC_1158	0	11	0	0	0
IG_VC_1159	0	3	0	0	0
IG_VC_1160	0	3	0	0	0
IG_VC_1163	0	14	0	0	0
IG_VC_1164	0	10	0	0	0
IG_VC_1165	0	7	0	0	0
IG_VC_1167	0	4	0	0	0
IG_VC_1168	0	5	0	0	0
IG_VC_1169	0	11	0	0	0
IG_VC_1171	0	3	0	0	0
IG_VC_1176	0	3	0	0	0
IG_VC_1177	0	9	0	0	0
IG_VC_1179	0	7	0	0	0
IG_VC_1180	0	6	0	0	0
IG_VC_1182	0	12	0	0	0
IG_VC_1185	0	20	0	0	0
IG_VC_1186	0	7	0	0	0
IG_VC_1189	0	28	0	0	0
IG_VC_1190	0	12	0	0	0
IG_VC_1191	0	5	0	0	0
IG_VC_1192	0	7	0	0	0
IG_VC_1193	0	5	0	0	0
IG_VC_1194	0	10	0	0	0
IG_VC_1195	0	3	0	0	0
IG_VC_1196	0	5	0	0	0
IG_VC_1197	0	9	0	0	0
IG_VC_1198	0	10	0	0	0
[truncated: 4,643 more rows]

## Sheet: Tn mutants not in C6706 37R 
Mutated genes in Tnseq library Vc co969 rugose colonies at 22ºC that are absent in Tnseq library Vc C6706 rugose colonies at 37ºC: mutated genes ordered by total reads/clone
OBS! Only genes with number of genes per clone >1 are considered as candidates
Locus	# of hit TAs	Total TAs	Fraction TAs hit	Total reads	Avg_Reads per TA	Reads per clone	Gene
VC_2744	7	71	0.099	31034	437.1	14.6249	GTP-binding protein typA/BipA
VC_2677	5	30	0.167	12687	422.9	5.97879	HTH-type transcriptional repressor cytR
VC_0659	5	62	0.081	10920	176.1	5.14609	prfC (Peptide chain release factor 3)
VC_0249	6	128	0.047	10487	81.9	4.94204	rfbl (putative LONG-CHAIN-FATTY-ACID--COA LIGASE)
VC_2062	5	53	0.094	10041	189.5	4.73186	response regulator CheB (chemotaxis-specific methylesterase)
VC_0244	5	86	0.058	8995	104.6	4.23893	perosamine synthase (involved in LPS metabolism?)
VC_2534	2	43	0.047	8525	198.3	4.01744	putative Mg/Co/Ni transporter MgtE
VC_2437	3	55	0.055	7673	139.5	3.61593	fragment of Bifunctional protein hldE [Includes: D-beta-D-heptose 7-phosphate kinase ; D-beta-D-heptose 1-phosphate adenosyltransferase] (part 1)
VC_0234	5	60	0.083	7181	119.7	3.38407	putative Mannosyltransferase OCH1 and related enzyme
VC_2529	6	61	0.098	6925	113.5	3.26343	rpoN (RNA polymerase, sigma 54 (sigma N) factor)
VC_0251	9	162	0.056	6679	41.2	3.1475	acyl protein synthase/acyl-CoA reductase RfbN (orthology with LuxE)
IG_VC_0430	1	13	0.077	6463	497.2	3.04571	VC0430 is putative TRAP transporter solute receptor, TAXI family, periplasmic component
VC_0243	8	97	0.082	6309	65	2.97314	rfbD (GDP-mannose 4,6-dehydratase)
VC_A1105	1	34	0.029	6244	183.6	2.94251	DNA-binding response regulator, two-component system, OmpR family
IG_VC_1722	4	26	0.154	6200	238.5	2.92177	VC1722 is Positive regulator of competence TfoX-2
VC_2312	4	42	0.095	5908	140.7	2.78417	mltA (membrane-bound lytic murein transglycosylase A)
VC_0046	4	22	0.182	5765	262	2.71678	def-1 (Peptide deformylase 1)
VC_2061	4	47	0.085	5674	120.7	2.67389	ParA family protein
VC_0660	2	38	0.053	5663	149	2.66871	srmb (ATP-dependent RNA helicase srmB)
VC_2063	5	112	0.045	5396	48.2	2.54288	chemotaxis protein CheA
VC_1903	3	119	0.025	5267	44.3	2.48209	DNA translocase FtsK
VC_2442	5	59	0.085	5262	89.2	2.47974	pho4 family protein (inorganic phosphate transporter, PiT family)
VC_0241	23	107	0.215	5214	48.7	2.45712	mannose-1-phosphate guanylyltransferase
VC_0304	19	68	0.279	5010	73.7	2.36098	gppA (Guanosine-5'-triphosphate,3'-diphosphate pyrophosphatase)
IG_VC_2070	1	20	0.05	4860	243	2.29029	VC2070 is putative phosphohistidine phosphatase SixA (157 aa)
VC_0704	2	60	0.033	4816	80.3	2.26956	nspS (norspermidine sensor)
VC_2352	1	56	0.018	4799	85.7	2.26155	Nucleoside permease nupX
VC_2023	1	44	0.023	4202	95.5	1.98021	fabH (3-oxoacyl-[acyl-carrier-protein] synthase 3)
VC_1942	1	42	0.024	4182	99.6	1.97078	Bifunctional protein folD [Includes: Methylenetetrahydrofolate dehydrogenase ; Methenyltetrahydrofolate cyclohydrolase]
VC_2273	1	47	0.021	4015	85.4	1.89208	proA (gamma-glutamylphosphate reductase)
IG_VC_0347	1	13	0.077	3580	275.4	1.68709	RNA-binding protein Hfq
VC_0225	1	42	0.024	3552	84.6	1.67389	lipopolysaccharide biosynthesis protein
VC_0709	1	35	0.029	3489	99.7	1.6442	rluD (23S rRNA pseudouridine synthase D)
VC_2127	4	18	0.222	3345	185.8	1.57634	putative Flagellar biosynthesis protein fliL
VC_2230	2	23	0.087	3140	136.5	1.47974	gmhA (phosphoheptose isomerase, LPS biosinthesis)
VC_2260	1	42	0.024	2861	68.1	1.34826	rpsB (30S ribosomal protein S2)
VC_0691	2	41	0.049	2850	69.5	1.34307	anmk (Anhydro-N-acetylmuramic acid kinase)
VC_2684	3	90	0.033	2622	29.1	1.23563	metL (Bifunctional aspartokinase/homoserine dehydrogenase II)
VC_2749	13	57	0.228	2502	43.9	1.17908	glnG (Nitrogen regulation protein NR(I))
VC_0252	2	43	0.047	2476	57.6	1.16682	galactoside O-acetyltransferase
VC_1384	1	23	0.043	2270	98.7	1.06975	hypothetical protein (membrane protein)
VC_2512	1	13	0.077	2226	171.2	1.04901	Putative translation initiation inhibitor, yjgF family (Endoribonuclease L-PSP)
VC_2518	1	16	0.062	2202	137.6	1.0377	hypothetical protein (orthology with phospholipid/cholesterol/gamma-HCH transport system substrate-binding protein)
VC_0694	1	60	0.017	2174	36.2	1.02451	putative Autolysin sensor kinase
VC_0966	1	11	0.091	2143	194.8	1.0099	ptsH (Phosphocarrier protein HPr)
IG_VC_2138	4	15	0.267	2019	134.6	0.951461	VC2138 is Flagellar protein FlaJ
VC_0419	1	55	0.018	1958	35.6	0.922714	ribonuclease G
VC_0245	3	113	0.027	1928	17.1	0.908577	rfbG (putative UDP-Glycosyltransferase/glycogen phosphorylase)
VC_A0627	1	21	0.048	1897	90.3	0.893968	putative rRNA methylase
VC_2278	1	53	0.019	1886	35.6	0.888784	Guanine/hypoxanthine permease pbuG
VC_0259	6	103	0.058	1760	17.1	0.829406	Lipopolysaccharide biosynthesis protein RfbV
IG_VC_1592	1	15	0.067	1692	112.8	0.797361	VC1591 short chain dehydrogenase/reductase family oxidoreductaseVC0121 EAL family protein; VC1592 GGDEF family protein; VC1593 GGDEF family protein
IG_VC_2679	1	13	0.077	1642	126.3	0.773798	VC2678 primosome assembly protein PriA; VC2679 rpmE (50S ribosomal subunit protein L31); VC2681 malate oxidoreductase
VC_0634	1	20	0.05	1563	78.2	0.736569	transcription elongation factor GreA
VC_1831	1	123	0.008	1562	12.7	0.736098	putative Methyl-accepting chemotaxis protein
VC_0333	1	33	0.03	1554	47.1	0.732328	TetR family transcriptional regulator
VC_A1067	3	58	0.052	1540	26.6	0.72573	calB Coniferyl aldehyde dehydrogenase
VC_0250	4	72	0.056	1464	20.3	0.689915	putative iron-containing alcohol dehydrogenase
VC_2565	1	22	0.045	1398	63.5	0.658812	Protein elaA
IG_VC_0218	1	16	0.062	1384	86.5	0.652215	VC0217 DNA repair protein RadC; VC0218 rpmB (50S ribosomal protein L28)
VC_2617	1	43	0.023	1295	30.1	0.610273	putative Arginine N-succinyltransferase beta subunit
VC_1608	1	50	0.02	1272	25.4	0.599434	putative ABC-type multidrug transport system, permease component
VC_A0527	1	43	0.023	1271	29.6	0.598963	Putative GTPase (G3E family)
VC_A0987	1	71	0.014	1228	17.3	0.578699	ppsA (phosphoenolpyruvate synthase)
VC_2629	7	34	0.206	1170	34.4	0.551367	aroK shikimate kinase I
VC_0290	1	18	0.056	1166	64.8	0.549482	DNA-binding protein fis
VC_0909	2	39	0.051	1129	28.9	0.532045	treR (trehalose repressor)
VC_0398	4	98	0.041	1081	11	0.509425	small RNA CsrD
VC_2089	5	80	0.062	1073	13.4	0.505655	sdhA (succinate dehydrogenase, flavoprotein subunit)
IG_VC_0901	2	7	0.286	1065	152.1	0.501885	VC0902 queF 7-cyano-7-deazaguanine reductase; VC0901 putative TPR-repeat-containing protein
VC_A0720	1	30	0.033	1058	35.3	0.498586	guanylate cyclase-like protein
VC_A1114	1	41	0.024	1002	24.4	0.472196	Chromosome (plasmid) partitioning protein ParB
VC_0347	1	12	0.083	987	82.2	0.465127	RNA-binding protein Hfq
VC_A0036	1	57	0.018	943	16.5	0.444392	Serine/threonine transporter sstT
IG_VC_0828	1	40	0.025	939	23.5	0.442507	VC0827 toxin co-regulated pilus biosynthesis protein H; VC0828 tcpA (Toxin coregulated pilin)
IG_VC_1711	1	27	0.037	934	34.6	0.440151	VC1710 diguanylate phosphodiesterase; VC1711 putative B12 binding domain (B12-BD)fused with Radical SAM superfamily protein
IG_VC_2201	1	13	0.077	920	70.8	0.433553	VC2201 Chemotaxis protein methyltransferase
VC_0595	1	37	0.027	918	24.8	0.432611	gluQ (Glutamyl-Q tRNA(Asp) synthetase)
VC_A0765	1	40	0.025	908	22.7	0.427898	ltaE (Low specificity L-threonine aldolase)
VC_A0694	1	19	0.053	901	47.4	0.424599	hypothetical protein
VC_A1015	1	60	0.017	899	15	0.423657	Putative Na+/H+ antiporter NhaD type _
VC_A0661	1	21	0.048	882	42	0.415646	putative Domain amino terminal to FKBP-type peptidyl-prolyl isomerase
VC_0213	1	44	0.023	875	19.9	0.412347	htrB (Lipid A biosynthesis lauroyl acyltransferase)
VC_A0790	2	102	0.02	852	8.4	0.401508	conserved hypothetical protein (phage integrase)
VC_1760	2	185	0.011	825	4.5	0.388784	putative DNA/RNA helicase, SNF2 family
VC_1791	1	59	0.017	794	13.5	0.374175	putative Mu-like prophage protein
VC_0300	2	53	0.038	793	15	0.373704	putative signal-transduction protein containing cAMP-binding and CBS domains
VC_2364	3	89	0.034	793	8.9	0.373704	thrA (Bifunctional aspartokinase/homoserine dehydrogenase 1)
VC_A0770	1	4	0.25	786	196.5	0.370405	hypothetical protein (39 aa) (orthologs only in Vibrio); VCA0769 acyl carrier protein phosphodiesterase; VCA0772 tyrosine-specific transport protein
VC_0785	1	2	0.5	767	383.5	0.361451	(no entry found); VC0784 sodium/alanine symporter
VC_2742	1	45	0.022	686	15.2	0.32328	putative Ribonuclease BN
VC_2139	4	17	0.235	673	39.6	0.317154	putative flagellar FliT protein
VC_A0068	2	70	0.029	673	9.6	0.317154	putative Methyl-accepting chemotaxis protein
IG_VC_2720	1	7	0.143	655	93.6	0.308671	VC2720 Fe/S biogenesis protein nfuA; VC2719 ComF-like protein
VC_1409	2	65	0.031	655	10.1	0.308671	putative RND efflux system, outer membrane lipoprotein, NodT
VC_2547	1	147	0.007	610	4.1	0.287465	conserved hypothetical protein (translocation and assembly module TamB)
VC_0995	1	73	0.014	577	7.9	0.271913	PTS system N-acetylglucosamine-specific transporter subunit IIABC
VC_0269	1	77	0.013	552	7.2	0.260132	mannose-6-phosphate isomerase
VC_1632	1	67	0.015	550	8.2	0.259189	putative nucleoside-diphosphate-sugar epimerase
VC_1722	3	32	0.094	482	15.1	0.227144	Positive regulator of competence TfoX-2
VC_A0311	1	21	0.048	456	21.7	0.214892	Plasmid stabilization system protein ParE (Toxin of TA system ParD-ParE)
VC_A0385	1	21	0.048	456	21.7	0.214892	Plasmid stabilization system ParE protein (toxin of TA system ParD-ParE)
VC_1647	2	82	0.024	453	5.5	0.213478	hypothetical protein (ABC transporter substrate-binding protein)
VC_0039	1	35	0.029	426	12.2	0.200754	putative Sporulation stage 0, protein M family protein
VC_A0544	1	56	0.018	399	7.1	0.18803	putative ATP-dependent endonuclease of the OLD family
VC_A0721	1	9	0.111	370	41.1	0.174364	hypothetical protein (53 aa) (only in Vibrio); VCA0720 guanylate cyclase-like protein
VC_0203	2	62	0.032	368	5.9	0.173421	Iron(3+)-hydroxamate import system permease protein fhuB
VC_A0120	4	147	0.027	352	2.4	0.165881	putative Type VI secretion system, IcmF
VC_0183	3	152	0.02	332	2.2	0.156456	hypothetical protein (phage integrase)
VC_2463	1	73	0.014	317	4.3	0.149387	GTP-binding protein lepA
VC_0559	1	44	0.023	305	6.9	0.143732	putative ABC-type uncharacterized transport system,permease component
VC_0242	16	109	0.147	292	2.7	0.137606	phosphomannomutase
VC_A0730	2	126	0.016	272	2.2	0.128181	putative SIR2-like domain protein
VC_2345	3	41	0.073	271	6.6	0.12771	serB (phosphoserine phosphatase)
VC_0919	5	38	0.132	259	6.8	0.122055	vpsC		look for a small RNA in VC0919
VC_1741	1	38	0.026	254	6.7	0.119698	putative Transcription regulator, TetR-like
VC_0248	1	22	0.045	234	10.6	0.110273	putative acyl carrier protein
VC_0383	2	8	0.25	233	29.1	0.109802	hypothetical protein (RepB)
IG_VC_0342	1	101	0.01	232	2.3	0.109331	VC0342 putative 4Fe-4S ferredoxins iron-sulfur binding protein; VC0343 tRNA threonylcarbamoyladenosine biosynthesis protein TsaE

## Sheet: Tnseq2res_HitFraction
Tnseq2 library (co969 22ºC rugose)
Locus	# of hit TAs	Total TAs	Fraction TAs hit	Total reads	Avg_Reads per TA
VC_2750	24	139	0.173	43606	313.7
VC_0703	22	115	0.191	35477	308.5
VC_0998	27	165	0.164	35225	213.5
VC_2744	7	71	0.099	31034	437.1
VC_2535	12	59	0.203	29710	503.6
VC_2068	18	58	0.31	26133	450.6
VC_0422	9	57	0.158	25069	439.8
VC_2344	34	110	0.309	24840	225.8
VC_2128	16	58	0.276	22393	386.1
VC_2627	15	59	0.254	21246	360.1
VC_2775	13	71	0.183	21073	296.8
VC_2195	11	33	0.333	20364	617.1
VC_0420	33	146	0.226	16343	111.9
VC_0965	9	78	0.115	14460	185.4
VC_2059	6	24	0.25	14135	589
VC_2120	9	38	0.237	13985	368
VC_2677	5	30	0.167	12687	422.9
VC_2140	14	63	0.222	12453	197.7
VC_2135	14	67	0.209	12415	185.3
VC_2069	23	86	0.267	12372	143.9
VC_2208	15	51	0.294	12084	236.9
VC_0003	10	51	0.196	11430	224.1
VC_0659	5	62	0.081	10920	176.1
VC_0249	6	128	0.047	10487	81.9
VC_2062	5	53	0.094	10041	189.5
VC_2005	4	19	0.211	9859	518.9
VC_2197	22	74	0.297	9645	130.3
VC_0900	15	70	0.214	9116	130.2
VC_2134	4	13	0.308	8999	692.2
VC_0244	5	86	0.058	8995	104.6
VC_2207	6	32	0.188	8985	280.8
VC_2534	2	43	0.047	8525	198.3
VC_2192	8	34	0.235	8447	248.4
VC_0274	11	37	0.297	8015	216.6
VC_2437	3	55	0.055	7673	139.5
VC_1428	3	52	0.058	7598	146.1
VC_0653	18	81	0.222	7359	90.9
VC_0234	5	60	0.083	7181	119.7
VC_2066	5	37	0.135	7163	193.6
VC_2190	17	60	0.283	7026	117.1
VC_2199	11	23	0.478	7000	304.3
VC_2529	6	61	0.098	6925	113.5
VC_A0920	6	29	0.207	6768	233.4
VC_0251	9	162	0.056	6679	41.2
VC_2123	8	35	0.229	6632	189.5
IG_VC_0430	1	13	0.077	6463	497.2
VC_0243	8	97	0.082	6309	65
VC_A1105	1	34	0.029	6244	183.6
IG_VC_1722	4	26	0.154	6200	238.5
VC_2312	4	42	0.095	5908	140.7
VC_0046	4	22	0.182	5765	262
VC_2061	4	47	0.085	5674	120.7
VC_0660	2	38	0.053	5663	149
VC_2193	7	35	0.2	5513	157.5
VC_2063	5	112	0.045	5396	48.2
IG_VC_2134	1	2	0.5	5392	2696
VC_1903	3	119	0.025	5267	44.3
VC_2442	5	59	0.085	5262	89.2
VC_0241	23	107	0.215	5214	48.7
VC_0304	19	68	0.279	5010	73.7
IG_VC_2070	1	20	0.05	4860	243
VC_0704	2	60	0.033	4816	80.3
VC_2352	1	56	0.018	4799	85.7
VC_1424	5	55	0.091	4700	85.5
VC_2121	8	33	0.242	4445	134.7
VC_2133	20	65	0.308	4356	67
VC_2191	21	78	0.269	4274	54.8
VC_2023	1	44	0.023	4202	95.5
VC_1942	1	42	0.024	4182	99.6
VC_1231	2	34	0.059	4129	121.4
VC_2273	1	47	0.021	4015	85.4
VC_2131	5	25	0.2	3990	159.6
VC_2137	12	54	0.222	3746	69.4
VC_2456	2	64	0.031	3651	57
VC_2194	12	35	0.343	3642	104.1
IG_VC_0347	1	13	0.077	3580	275.4
VC_0225	1	42	0.024	3552	84.6
VC_1348	7	67	0.104	3505	52.3
VC_0709	1	35	0.029	3489	99.7
VC_2127	4	18	0.222	3345	185.8
VC_2130	11	45	0.244	3265	72.6
VC_2126	8	33	0.242	3181	96.4
VC_2230	2	23	0.087	3140	136.5
VC_2203	7	32	0.219	3019	94.3
VC_2260	1	42	0.024	2861	68.1
VC_0691	2	41	0.049	2850	69.5
VC_1427	3	53	0.057	2805	52.9
VC_2206	4	22	0.182	2745	124.8
VC_2684	3	90	0.033	2622	29.1
VC_2205	7	19	0.368	2514	132.3
VC_2749	13	57	0.228	2502	43.9
VC_0252	2	43	0.047	2476	57.6
VC_2058	4	13	0.308	2359	181.5
VC_2129	6	17	0.353	2356	138.6
VC_1384	1	23	0.043	2270	98.7
VC_2512	1	13	0.077	2226	171.2
VC_2518	1	16	0.062	2202	137.6
VC_0694	1	60	0.017	2174	36.2
VC_0966	1	11	0.091	2143	194.8
IG_VC_2138	4	15	0.267	2019	134.6
VC_0419	1	55	0.018	1958	35.6
VC_0245	3	113	0.027	1928	17.1
VC_A0627	1	21	0.048	1897	90.3
VC_A0131	2	34	0.059	1892	55.6
VC_2278	1	53	0.019	1886	35.6
VC_0259	6	103	0.058	1760	17.1
VC_0121	2	9	0.222	1750	194.4
IG_VC_1592	1	15	0.067	1692	112.8
IG_VC_2679	1	13	0.077	1642	126.3
IG_VC_2205	1	7	0.143	1634	233.4
VC_0634	1	20	0.05	1563	78.2
VC_1831	1	123	0.008	1562	12.7
VC_0333	1	33	0.03	1554	47.1
VC_A1067	3	58	0.052	1540	26.6
VC_0793	1	59	0.017	1500	25.4
VC_0250	4	72	0.056	1464	20.3
VC_2565	1	22	0.045	1398	63.5
IG_VC_0218	1	16	0.062	1384	86.5
IG_VC_2630	4	15	0.267	1317	87.8
IG_VC_0641	3	28	0.107	1308	46.7
VC_2072	21	133	0.158	1301	9.8
VC_2617	1	43	0.023	1295	30.1
VC_2188	10	41	0.244	1294	31.6
VC_1608	1	50	0.02	1272	25.4
VC_A0527	1	43	0.023	1271	29.6
VC_0654	1	23	0.043	1234	53.7
VC_A0987	1	71	0.014	1228	17.3
IG_VC_0654	6	23	0.261	1195	52
IG_VC_2192	3	16	0.188	1171	73.2
VC_2629	7	34	0.206	1170	34.4
VC_0290	1	18	0.056	1166	64.8
VC_0909	2	39	0.051	1129	28.9
IG_VC_2196	2	3	0.667	1124	374.7
VC_0398	4	98	0.041	1081	11
VC_2089	5	80	0.062	1073	13.4
IG_VC_0901	2	7	0.286	1065	152.1
VC_A0720	1	30	0.033	1058	35.3
VC_A1114	1	41	0.024	1002	24.4
VC_0347	1	12	0.083	987	82.2
VC_2122	4	13	0.308	955	73.5
VC_A0036	1	57	0.018	943	16.5
IG_VC_0828	1	40	0.025	939	23.5
IG_VC_1711	1	27	0.037	934	34.6
IG_VC_2200	1	1	1	923	923
IG_VC_2201	1	13	0.077	920	70.8
VC_0595	1	37	0.027	918	24.8
VC_A0765	1	40	0.025	908	22.7
VC_A0694	1	19	0.053	901	47.4
VC_A1015	1	60	0.017	899	15
VC_A0661	1	21	0.048	882	42
VC_2124	2	14	0.143	879	62.8
VC_0213	1	44	0.023	875	19.9
VC_A0790	2	102	0.02	852	8.4
VC_1760	2	185	0.011	825	4.5
VC_1791	1	59	0.017	794	13.5
VC_0300	2	53	0.038	793	15
VC_2364	3	89	0.034	793	8.9
VC_A0770	1	4	0.25	786	196.5
IG_VC_2040	1	8	0.125	769	96.1
VC_0785	1	2	0.5	767	383.5
VC_2742	1	45	0.022	686	15.2
VC_2139	4	17	0.235	673	39.6
VC_A0068	2	70	0.029	673	9.6
IG_VC_2720	1	7	0.143	655	93.6
VC_1409	2	65	0.031	655	10.1
VC_2547	1	147	0.007	610	4.1
VC_0995	1	73	0.014	577	7.9
IG_VC_2212	1	26	0.038	560	21.5
VC_0269	1	77	0.013	552	7.2
VC_1632	1	67	0.015	550	8.2
VC_1722	3	32	0.094	482	15.1
VC_2132	13	29	0.448	458	15.8
VC_A0311	1	21	0.048	456	21.7
VC_A0385	1	21	0.048	456	21.7
VC_1647	2	82	0.024	453	5.5
VC_0039	1	35	0.029	426	12.2
VC_A0544	1	56	0.018	399	7.1
VC_A0721	1	9	0.111	370	41.1
VC_0203	2	62	0.032	368	5.9
VC_A0120	4	147	0.027	352	2.4
VC_0183	3	152	0.02	332	2.2
VC_2463	1	73	0.014	317	4.3
VC_0559	1	44	0.023	305	6.9
VC_0242	16	109	0.147	292	2.7
IG_VC_1901	2	52	0.038	283	5.4
VC_A0730	2	126	0.016	272	2.2
VC_2345	3	41	0.073	271	6.6
VC_0919	5	38	0.132	259	6.8
VC_1741	1	38	0.026	254	6.7
IG_VC_2752	26	647	0.04	244	0.4
VC_0248	1	22	0.045	234	10.6
VC_0383	2	8	0.25	233	29.1
IG_VC_0342	1	101	0.01	232	2.3
VC_1148	2	41	0.049	206	5
VC_2636	1	39	0.026	198	5.1
VC_0374	6	65	0.092	195	3
VC_0921	10	96	0.104	191	2
VC_0180	4	123	0.033	190	1.5
VC_2726	5	42	0.119	159	3.8
VC_0482	1	46	0.022	155	3.4
VC_2414	5	108	0.046	149	1.4
VC_0604	8	110	0.073	146	1.3
IG_VC_0060	16	315	0.051	134	0.4
VC_2290	13	63	0.206	132	2.1
IG_VC_0315	15	305	0.049	131	0.4
IG_VC_0714	15	307	0.049	131	0.4
IG_VC_2495	15	305	0.049	131	0.4
IG_VC_0161	16	300	0.053	130	0.4
VC_1161	1	60	0.017	130	2.2
IG_VC_0389	14	329	0.043	129	0.4
VC_0937	10	109	0.092	113	1
VC_0665	10	58	0.172	112	1.9
VC_2092	4	65	0.062	104	1.6
VC_2262	22	111	0.198	102	0.9
VC_A0074	9	51	0.176	97	1.9
VC_1067	28	127	0.22	96	0.8
VC_0922	10	92	0.109	92	1
IG_VC_1470	1	14	0.071	90	6.4
IG_VC_1476	1	14	0.071	90	6.4
VC_0918	7	56	0.125	88	1.6
VC_0917	6	51	0.118	82	1.6
VC_0305	13	53	0.245	78	1.5
VC_2087	4	113	0.035	77	0.7
VC_0925	5	52	0.096	76	1.5
VC_0934	8	79	0.101	76	1
VC_0935	6	63	0.095	73	1.2
VC_2436	6	60	0.1	67	1.1
VC_1774	3	75	0.04	64	0.9
VC_1920	6	93	0.065	61	0.7
VC_0430	13	49	0.265	59	1.2
VC_2701	8	68	0.118	57	0.8
VC_2156	10	45	0.222	56	1.2
VC_0321	11	79	0.139	53	0.7
VC_0409	1	41	0.024	51	1.2
VC_2291	5	38	0.132	51	1.3
VC_0927	4	33	0.121	50	1.5
VC_0535	13	100	0.13	49	0.5
VC_0260	11	114	0.096	47	0.4
VC_2174	4	80	0.05	45	0.6
VC_0362	12	77	0.156	44	0.6
VC_2125	4	16	0.25	44	2.8
VC_1437	7	119	0.059	43	0.4
VC_0094	2	47	0.043	42	0.9
VC_0920	7	61	0.115	42	0.7
VC_0303	8	144	0.056	41	0.3
VC_2091	1	13	0.077	41	3.2
VC_0298	2	88	0.023	40	0.5
VC_2293	6	30	0.2	40	1.3
VC_0924	3	70	0.043	39	0.6
VC_A0002	2	83	0.024	39	0.5
VC_2756	4	68	0.059	38	0.6
VC_0345	12	89	0.135	37	0.4
VC_2012	2	87	0.023	37	0.4
VC_2081	10	48	0.208	37	0.8
VC_A0075	6	27	0.222	36	1.3
VC_1097	11	87	0.126	35	0.4
VC_1442	4	85	0.047	35	0.4
VC_2051	4	28	0.143	35	1.2
VC_0122	13	105	0.124	34	0.3
VC_2142	2	44	0.045	34	0.8
VC_2294	4	60	0.067	33	0.6
VC_A0830	1	41	0.024	33	0.8
VC_0761	6	24	0.25	30	1.2
VC_1730	3	99	0.03	30	0.3
VC_2052	5	89	0.056	30	0.3
VC_0629	1	135	0.007	29	0.2
VC_2138	6	22	0.273	29	1.3
VC_1684	2	27	0.074	28	1
VC_2210	3	44	0.068	28	0.6
IG_VC_1933	2	10	0.2	27	2.7
VC_2136	5	32	0.156	26	0.8
VC_2164	8	67	0.119	26	0.4
VC_2200	6	25	0.24	26	1
VC_2465	7	32	0.219	26	0.8
VC_0224	6	34	0.176	25	0.7
VC_A0040	3	47	0.064	25	0.5
VC_2082	7	36	0.194	24	0.7
VC_2153	2	34	0.059	24	0.7
VC_A0039	4	18	0.222	24	1.3
VC_0130	2	87	0.023	23	0.3
VC_0239	10	94	0.106	23	0.2
VC_1426	2	39	0.051	23	0.6
VC_1441	3	29	0.103	23	0.8
VC_2413	4	60	0.067	23	0.4
VC_0186	4	45	0.089	22	0.5
VC_0936	4	22	0.182	22	1
VC_1141	4	96	0.042	22	0.2
VC_A0358	1	18	0.056	22	1.2
VC_A0414	1	17	0.059	22	1.3
VC_A0449	1	18	0.056	22	1.2
VC_0379	2	36	0.056	21	0.6
VC_2544	3	38	0.079	20	0.5
VC_2733	1	71	0.014	20	0.3
VC_A1113	2	58	0.034	20	0.3
VC_0132	1	63	0.016	19	0.3
VC_0468	7	43	0.163	19	0.4
VC_0594	3	49	0.061	19	0.4
VC_1439	2	51	0.039	19	0.4
VC_2053	2	23	0.087	19	0.8
VC_2418	2	36	0.056	19	0.5
VC_2736	6	34	0.176	19	0.6
VC_1009	1	24	0.042	18	0.8
VC_2090	1	23	0.043	18	0.8
VC_2198	3	25	0.12	18	0.7
VC_2622	2	40	0.05	18	0.5
VC_2724	1	17	0.059	18	1.1
VC_2746	4	63	0.063	18	0.3
VC_1880	6	24	0.25	17	0.7
VC_2086	1	51	0.02	17	0.3
VC_2295	2	56	0.036	17	0.3
VC_0036	2	61	0.033	16	0.3
VC_1073	2	120	0.017	16	0.1
VC_2008	1	51	0.02	16	0.3
VC_2371	1	47	0.021	16	0.3
VC_2498	1	22	0.045	16	0.7
VC_A0631	1	24	0.042	16	0.7
IG_VC_0156	2	23	0.087	15	0.7
IG_VC_0584	3	18	0.167	15	0.8
VC_0048	2	52	0.038	15	0.3
VC_0355	4	33	0.121	15	0.5
VC_0556	5	65	0.077	15	0.2
VC_1093	1	42	0.024	15	0.4
VC_2356	2	69	0.029	15	0.2
VC_A0221	1	40	0.025	15	0.4
VC_A0774	2	60	0.033	15	0.2
VC_0125	4	63	0.063	14	0.2
VC_0531	2	34	0.059	14	0.4
VC_1435	2	36	0.056	14	0.4
VC_2196	2	26	0.077	14	0.5
VC_2309	2	42	0.048	14	0.3
VC_2445	3	65	0.046	14	0.2
VC_2446	1	39	0.026	14	0.4
VC_2644	1	39	0.026	14	0.4
VC_2662	1	20	0.05	14	0.7
VC_A0014	1	76	0.013	14	0.2
VC_A0223	1	114	0.009	14	0.1
VC_0068	1	53	0.019	13	0.2
VC_0399	2	62	0.032	13	0.2
VC_0576	1	31	0.032	13	0.4
VC_0876	1	32	0.031	13	0.4
VC_1279	3	78	0.038	13	0.2
VC_1469	2	70	0.029	13	0.2
VC_1475	2	70	0.029	13	0.2
VC_2608	2	69	0.029	13	0.2
VC_2710	2	83	0.024	13	0.2
IG_VC_0261	3	8	0.375	12	1.5
IG_VC_1048	1	8	0.125	12	1.5
IG_VC_1183	1	36	0.028	12	0.3
IG_VC_2378	1	11	0.091	12	1.1
VC_0031	1	35	0.029	12	0.3
VC_0200	2	101	0.02	12	0.1
VC_0755	2	52	0.038	12	0.2
VC_1098	2	40	0.05	12	0.3
VC_1516	1	83	0.012	12	0.1
VC_2088	2	37	0.054	12	0.3
VC_2466	2	19	0.105	12	0.6
VC_2485	4	29	0.138	12	0.4
VC_2606	1	69	0.014	12	0.2
VC_2628	1	43	0.023	12	0.3
IG_VC_0771	1	17	0.059	11	0.6
VC_0212	2	34	0.059	11	0.3
VC_0536	1	5	0.2	11	2.2
VC_0581	1	86	0.012	11	0.1
VC_0851	4	24	0.167	11	0.5
VC_0999	4	34	0.118	11	0.3
VC_1367	2	119	0.017	11	0.1
VC_1732	5	50	0.1	11	0.2
VC_1967	1	119	0.008	11	0.1
VC_2067	4	48	0.083	11	0.2
VC_2083	5	34	0.147	11	0.3
VC_2143	3	43	0.07	11	0.3
VC_2311	2	25	0.08	11	0.4
VC_2353	1	36	0.028	11	0.3
VC_2643	1	25	0.04	11	0.4
VC_2650	2	14	0.143	11	0.8
VC_2702	2	23	0.087	11	0.5
VC_2741	1	17	0.059	11	0.6
VC_A0038	1	34	0.029	11	0.3
VC_A0185	1	16	0.062	11	0.7
VC_A0191	1	69	0.014	11	0.2
VC_A0767	8	33	0.242	11	0.3
VC_A0895	1	138	0.007	11	0.1
VC_A1098	1	70	0.014	11	0.2
IG_VC_2001	1	9	0.111	10	1.1
VC_0312	4	36	0.111	10	0.3
VC_0344	1	78	0.013	10	0.1
VC_0346	2	38	0.053	10	0.3
VC_0650	1	72	0.014	10	0.1
VC_0884	1	32	0.031	10	0.3
VC_1033	1	83	0.012	10	0.1
VC_1336	1	29	0.034	10	0.3
VC_A0180	2	47	0.043	10	0.2
VC_A0205	1	57	0.018	10	0.2
VC_A0222	1	33	0.03	10	0.3
VC_A0558	1	73	0.014	10	0.1
VC_A0805	1	66	0.015	10	0.2
IG_VC_0306	4	11	0.364	9	0.8
IG_VC_0494	1	38	0.026	9	0.2
IG_VC_2436	1	21	0.048	9	0.4
VC_0166	6	29	0.207	9	0.3
VC_0264	2	41	0.049	9	0.2
VC_0393	1	107	0.009	9	0.1
VC_0480	2	41	0.049	9	0.2
VC_1265	2	50	0.04	9	0.2
VC_1321	2	173	0.012	9	0.1
VC_1349	2	191	0.01	9	0
VC_1509	1	32	0.031	9	0.3
VC_1748	1	35	0.029	9	0.3
VC_1797	1	26	0.038	9	0.3
VC_1867	1	59	0.017	9	0.2
VC_1888	1	100	0.01	9	0.1
VC_1938	1	26	0.038	9	0.3
VC_2232	2	62	0.032	9	0.1
VC_2420	2	26	0.077	9	0.3
VC_2490	1	77	0.013	9	0.1
VC_A0044	1	150	0.007	9	0.1
VC_A0803	2	66	0.03	9	0.1
IG_VC_0601	1	5	0.2	8	1.6
IG_VC_1279	1	23	0.043	8	0.3
IG_VC_2129	1	8	0.125	8	1
VC_0029	2	38	0.053	8	0.2
VC_0044	1	40	0.025	8	0.2
VC_0097	1	23	0.043	8	0.3
VC_0135	2	55	0.036	8	0.1
VC_0196	2	62	0.032	8	0.1
VC_0370	1	54	0.019	8	0.1
VC_0390	1	157	0.006	8	0.1
VC_0508	1	29	0.034	8	0.3
VC_0525	3	18	0.167	8	0.4
VC_0911	1	74	0.014	8	0.1
VC_0969	1	51	0.02	8	0.2
VC_1413	1	81	0.012	8	0.1
VC_1596	1	48	0.021	8	0.2
VC_1629	3	120	0.025	8	0.1
VC_1885	1	18	0.056	8	0.4
VC_1918	3	83	0.036	8	0.1
VC_1975	1	61	0.016	8	0.1
VC_1983	1	77	0.013	8	0.1
VC_2209	3	271	0.011	8	0
VC_2338	1	128	0.008	8	0.1
VC_2417	2	52	0.038	8	0.2
VC_2469	1	70	0.014	8	0.1
VC_2598	1	31	0.032	8	0.3
VC_2654	1	22	0.045	8	0.4
VC_2693	2	55	0.036	8	0.1
VC_A0016	2	92	0.022	8	0.1
VC_A0702	2	46	0.043	8	0.2
VC_A0894	1	26	0.038	8	0.3
IG_VC_0631	1	10	0.1	7	0.7
IG_VC_2472	1	7	0.143	7	1
IG_VC_A0107	1	39	0.026	7	0.2
IG_VC_A0844	1	4	0.25	7	1.8
VC_0026	2	39	0.051	7	0.2
VC_0127	1	28	0.036	7	0.2
VC_0156	2	123	0.016	7	0.1
VC_0179	3	78	0.038	7	0.1
VC_0217	2	24	0.083	7	0.3
VC_0257	1	59	0.017	7	0.1
VC_0263	3	29	0.103	7	0.2
VC_0328	2	188	0.011	7	0
VC_0353	1	39	0.026	7	0.2
VC_0395	1	43	0.023	7	0.2
VC_0555	1	8	0.125	7	0.9
VC_0612	2	98	0.02	7	0.1
VC_1156	1	62	0.016	7	0.1
VC_1478	1	59	0.017	7	0.1
VC_1486	2	84	0.024	7	0.1
VC_1679	1	37	0.027	7	0.2
VC_1710	1	117	0.009	7	0.1
VC_1740	2	97	0.021	7	0.1
VC_1789	1	59	0.017	7	0.1
VC_1879	1	111	0.009	7	0.1
VC_1907	4	57	0.07	7	0.1
VC_1962	1	16	0.062	7	0.4
VC_1965	5	33	0.152	7	0.2
VC_2031	1	70	0.014	7	0.1
VC_2159	1	24	0.042	7	0.3
VC_2292	1	37	0.027	7	0.2
VC_2373	1	171	0.006	7	0
VC_2453	1	113	0.009	7	0.1
VC_2484	3	78	0.038	7	0.1
VC_2689	1	43	0.023	7	0.2
VC_2698	1	62	0.016	7	0.1
VC_2711	1	66	0.015	7	0.1
VC_2739	2	76	0.026	7	0.1
VC_A0020	2	157	0.013	7	0
VC_A0153	1	25	0.04	7	0.3
VC_A0229	1	38	0.026	7	0.2
VC_A0371	1	59	0.017	7	0.1
VC_A0508	1	59	0.017	7	0.1
VC_A0589	1	46	0.022	7	0.2
VC_A0638	2	109	0.018	7	0.1
VC_A0665	1	79	0.013	7	0.1
VC_A0791	1	59	0.017	7	0.1
VC_A0883	2	58	0.034	7	0.1
IG_VC_0059	1	21	0.048	6	0.3
IG_VC_0167	3	13	0.231	6	0.5
IG_VC_0196	1	11	0.091	6	0.5
IG_VC_0429	1	8	0.125	6	0.8
IG_VC_0512	3	77	0.039	6	0.1
IG_VC_2440	1	32	0.031	6	0.2
IG_VC_2503	2	10	0.2	6	0.6
IG_VC_A0086	1	6	0.167	6	1
IG_VC_A0767	2	5	0.4	6	1.2
VC_0042	1	64	0.016	6	0.1
VC_0056	2	43	0.047	6	0.1
VC_0149	2	40	0.05	6	0.1
VC_0151	1	61	0.016	6	0.1
VC_0154	1	47	0.021	6	0.1
VC_0174	1	33	0.03	6	0.2
VC_0188	2	68	0.029	6	0.1
VC_0216	2	69	0.029	6	0.1
VC_0232	1	20	0.05	6	0.3
VC_0364	1	11	0.091	6	0.5
VC_0423	2	49	0.041	6	0.1
VC_0464	1	28	0.036	6	0.2
VC_0490	1	170	0.006	6	0
VC_0491	1	49	0.02	6	0.1
VC_0493	1	49	0.02	6	0.1
VC_0554	1	119	0.008	6	0.1
VC_0583	3	23	0.13	6	0.3
VC_0622	1	171	0.006	6	0
VC_0630	2	77	0.026	6	0.1
VC_0651	1	44	0.023	6	0.1
VC_0760	1	59	0.017	6	0.1
VC_0856	1	33	0.03	6	0.2
VC_0926	1	59	0.017	6	0.1
VC_0988	1	82	0.012	6	0.1
VC_0990	1	23	0.043	6	0.3
VC_0993	1	55	0.018	6	0.1
VC_1010	1	26	0.038	6	0.2
VC_1050	3	46	0.065	6	0.1
VC_1145	2	92	0.022	6	0.1
VC_1198	2	153	0.013	6	0
VC_1429	1	49	0.02	6	0.1
VC_1448	1	106	0.009	6	0.1
VC_1650	1	137	0.007	6	0
VC_1681	2	52	0.038	6	0.1
VC_1782	1	51	0.02	6	0.1
VC_1798	1	63	0.016	6	0.1
VC_2018	1	43	0.023	6	0.1
VC_2279	1	67	0.015	6	0.1
VC_2400	1	59	0.017	6	0.1
VC_2412	1	55	0.018	6	0.1
VC_2424	1	69	0.014	6	0.1
VC_2601	1	39	0.026	6	0.2
VC_2700	3	149	0.02	6	0
VC_2709	1	7	0.143	6	0.9
VC_2716	2	71	0.028	6	0.1
VC_A0008	1	79	0.013	6	0.1
VC_A0080	1	104	0.01	6	0.1
VC_A0097	1	28	0.036	6	0.2
VC_A0196	1	26	0.038	6	0.2
VC_A0214	1	67	0.015	6	0.1
VC_A0400	1	28	0.036	6	0.2
VC_A0479	1	28	0.036	6	0.2
VC_A0762	1	53	0.019	6	0.1
VC_A0864	1	63	0.016	6	0.1
VC_A0939	1	41	0.024	6	0.1
VC_A1013	1	30	0.033	6	0.2
IG_VC_0709	3	12	0.25	5	0.4
IG_VC_0955	1	2	0.5	5	2.5
IG_VC_1637	2	18	0.111	5	0.3
IG_VC_2058	1	33	0.03	5	0.2
IG_VC_2344	1	10	0.1	5	0.5
IG_VC_A0002	2	54	0.037	5	0.1
IG_VC_A0041	1	38	0.026	5	0.1
IG_VC_A0142	1	18	0.056	5	0.3
VC_0063	1	38	0.026	5	0.1
VC_0090	1	58	0.017	5	0.1
VC_0262	1	59	0.017	5	0.1
VC_0271	2	47	0.043	5	0.1
VC_0416	1	48	0.021	5	0.1
VC_0472	1	42	0.024	5	0.1
VC_0495	1	40	0.025	5	0.1
VC_0640	1	15	0.067	5	0.3
VC_0769	1	79	0.013	5	0.1
VC_0914	2	142	0.014	5	0
VC_0916	1	34	0.029	5	0.1
VC_0943	2	42	0.048	5	0.1
VC_1091	2	69	0.029	5	0.1
VC_1152	2	47	0.043	5	0.1
VC_1283	1	14	0.071	5	0.4
VC_1338	1	90	0.011	5	0.1
VC_1535	1	61	0.016	5	0.1
VC_1579	1	86	0.012	5	0.1
VC_1669	2	61	0.033	5	0.1
VC_1768	2	86	0.023	5	0.1
VC_1771	3	246	0.012	5	0
VC_1842	1	7	0.143	5	0.7
VC_1857	1	19	0.053	5	0.3
VC_1934	3	110	0.027	5	0
VC_1944	1	44	0.023	5	0.1
VC_1949	1	99	0.01	5	0.1
VC_2033	3	128	0.023	5	0
VC_2161	2	83	0.024	5	0.1
VC_2212	1	54	0.019	5	0.1
VC_2441	1	27	0.037	5	0.2
VC_2600	2	90	0.022	5	0.1
VC_2609	2	17	0.118	5	0.3
VC_2620	1	46	0.022	5	0.1
VC_2713	1	52	0.019	5	0.1
VC_2738	3	75	0.04	5	0.1
VC_A0510	1	160	0.006	5	0
VC_A0595	1	38	0.026	5	0.1
VC_A0710	1	46	0.022	5	0.1
VC_A0716	1	27	0.037	5	0.2
VC_A0780	1	48	0.021	5	0.1
VC_A0795	1	72	0.014	5	0.1
IG_VC_0241	1	42	0.024	4	0.1
IG_VC_0397	1	20	0.05	4	0.2
IG_VC_0406	1	1	1	4	4
IG_VC_0876	2	14	0.143	4	0.3
IG_VC_0917	2	31	0.065	4	0.1
IG_VC_1143	1	35	0.029	4	0.1
IG_VC_1562	2	9	0.222	4	0.4
IG_VC_1624	2	18	0.111	4	0.2
IG_VC_2291	1	4	0.25	4	1
IG_VC_2339	1	18	0.056	4	0.2
IG_VC_2683	1	20	0.05	4	0.2
IG_VC_A0141	1	5	0.2	4	0.8
IG_VC_A0330	4	81	0.049	4	0
IG_VC_A0477	2	10	0.2	4	0.4
VC_0010	2	36	0.056	4	0.1
VC_0093	2	87	0.023	4	0
VC_0171	1	68	0.015	4	0.1
VC_0207	1	51	0.02	4	0.1
VC_0282	1	52	0.019	4	0.1
VC_0377	3	14	0.214	4	0.3
VC_0386	1	44	0.023	4	0.1
VC_0389	2	71	0.028	4	0.1
VC_0429	1	108	0.009	4	0
VC_0452	1	43	0.023	4	0.1
VC_0459	1	17	0.059	4	0.2
VC_0503	1	80	0.013	4	0.1
VC_0526	1	43	0.023	4	0.1
VC_0551	1	50	0.02	4	0.1
VC_0586	1	36	0.028	4	0.1
VC_0672	2	102	0.02	4	0
VC_0721	2	36	0.056	4	0.1
VC_0758	1	44	0.023	4	0.1
VC_0964	2	21	0.095	4	0.2
VC_0992	1	82	0.012	4	0
VC_1018	1	91	0.011	4	0
VC_1036	1	80	0.013	4	0.1
VC_1081	1	55	0.018	4	0.1
VC_1087	1	75	0.013	4	0.1
VC_1104	2	85	0.024	4	0
VC_1138	1	24	0.042	4	0.2
VC_1287	1	94	0.011	4	0
VC_1334	1	26	0.038	4	0.2
VC_1558	1	72	0.014	4	0.1
VC_1649	1	119	0.008	4	0
VC_1753	1	68	0.015	4	0.1
VC_1824	1	31	0.032	4	0.1
VC_1862	2	44	0.045	4	0.1
VC_1990	1	69	0.014	4	0.1
VC_2040	1	12	0.083	4	0.3
VC_2055	1	34	0.029	4	0.1
VC_2166	1	24	0.042	4	0.2
VC_2380	1	39	0.026	4	0.1
VC_2382	1	30	0.033	4	0.1
VC_2384	2	33	0.061	4	0.1
VC_2423	1	36	0.028	4	0.1
VC_2438	1	102	0.01	4	0
VC_2500	1	58	0.017	4	0.1
VC_2516	2	10	0.2	4	0.4
VC_2523	1	34	0.029	4	0.1
VC_2538	1	60	0.017	4	0.1
VC_2557	1	25	0.04	4	0.2
VC_2614	3	24	0.125	4	0.2
VC_2630	2	73	0.027	4	0.1
VC_2634	1	49	0.02	4	0.1
VC_2653	1	9	0.111	4	0.4
VC_2720	1	23	0.043	4	0.2
VC_2759	1	35	0.029	4	0.1
VC_A0064	1	100	0.01	4	0
VC_A0096	1	72	0.014	4	0.1
VC_A0128	1	43	0.023	4	0.1
VC_A0141	2	66	0.03	4	0.1
VC_A0303	1	30	0.033	4	0.1
VC_A0368	1	49	0.02	4	0.1
VC_A0465	1	31	0.032	4	0.1
VC_A0567	2	56	0.036	4	0.1
VC_A0646	1	73	0.014	4	0.1
VC_A0652	1	13	0.077	4	0.3
VC_A0709	1	103	0.01	4	0
VC_A0781	2	92	0.022	4	0
VC_A0929	1	36	0.028	4	0.1
VC_A0944	1	70	0.014	4	0.1
VC_A0976	1	22	0.045	4	0.2
IG_VC_0263	1	1	1	3	3
IG_VC_0503	1	61	0.016	3	0
IG_VC_0534	1	5	0.2	3	0.6
IG_VC_0856	1	12	0.083	3	0.2
IG_VC_0890	1	2	0.5	3	1.5
IG_VC_0941	1	23	0.043	3	0.1
IG_VC_1372	1	34	0.029	3	0.1
IG_VC_1900	1	14	0.071	3	0.2
IG_VC_2074	1	9	0.111	3	0.3
IG_VC_2186	1	121	0.008	3	0
IG_VC_2242	1	6	0.167	3	0.5
IG_VC_2624	1	5	0.2	3	0.6
IG_VC_A0196	1	7	0.143	3	0.4
IG_VC_A0346	2	15	0.133	3	0.2
IG_VC_A0402	1	2	0.5	3	1.5
IG_VC_A1075	1	25	0.04	3	0.1
VC_0022	1	34	0.029	3	0.1
VC_0028	1	60	0.017	3	0.1
VC_0051	1	43	0.023	3	0.1
VC_0064	1	11	0.091	3	0.3
VC_0088	2	35	0.057	3	0.1
VC_0162	1	71	0.014	3	0
VC_0164	1	136	0.007	3	0
VC_0192	1	38	0.026	3	0.1
VC_0230	1	39	0.026	3	0.1
VC_0236	1	50	0.02	3	0.1
VC_0254	1	64	0.016	3	0
VC_0275	1	35	0.029	3	0.1
VC_0293	1	27	0.037	3	0.1
VC_0311	2	15	0.133	3	0.2
VC_0385	1	71	0.014	3	0
VC_0414	1	209	0.005	3	0
VC_0433	1	63	0.016	3	0
VC_0434	1	51	0.02	3	0.1
VC_0475	1	100	0.01	3	0
VC_0492	1	90	0.011	3	0
VC_0499	1	46	0.022	3	0.1
VC_0670	1	13	0.077	3	0.2
VC_0717	1	63	0.016	3	0
VC_0736	1	44	0.023	3	0.1
VC_0757	1	42	0.024	3	0.1
VC_0817	1	56	0.018	3	0.1
VC_0872	1	12	0.083	3	0.2
VC_1064	1	28	0.036	3	0.1
VC_1111	1	50	0.02	3	0.1
VC_1207	1	52	0.019	3	0.1
VC_1210	1	34	0.029	3	0.1
VC_1224	1	39	0.026	3	0.1
VC_1285	1	39	0.026	3	0.1
VC_1440	1	12	0.083	3	0.2
VC_1451	1	589	0.002	3	0
VC_1503	1	46	0.022	3	0.1
VC_1567	1	56	0.018	3	0.1
VC_1605	1	69	0.014	3	0
VC_1618	1	56	0.018	3	0.1
VC_1639	2	56	0.036	3	0.1
VC_1692	1	86	0.012	3	0
VC_1749	1	71	0.014	3	0
VC_1756	1	38	0.026	3	0.1
VC_1765	1	169	0.006	3	0
VC_1767	1	74	0.014	3	0
VC_1784	1	129	0.008	3	0
VC_1871	1	22	0.045	3	0.1
VC_1951	1	48	0.021	3	0.1
VC_2017	2	47	0.043	3	0.1
VC_2057	2	24	0.083	3	0.1
VC_2077	1	121	0.008	3	0
VC_2305	1	53	0.019	3	0.1
VC_2404	1	55	0.018	3	0.1
VC_2488	1	33	0.03	3	0.1
VC_2515	3	12	0.25	3	0.2
VC_2556	1	16	0.062	3	0.2
VC_2652	1	7	0.143	3	0.4
VC_2656	1	66	0.015	3	0
VC_2688	1	33	0.03	3	0.1
VC_2694	2	35	0.057	3	0.1
VC_2699	1	50	0.02	3	0.1
VC_2705	1	82	0.012	3	0
VC_2773	1	47	0.021	3	0.1
VC_A0051	2	51	0.039	3	0.1
VC_A0052	1	78	0.013	3	0
VC_A0072	1	39	0.026	3	0.1
VC_A0137	1	73	0.014	3	0
VC_A0147	1	46	0.022	3	0.1
VC_A0242	1	21	0.048	3	0.1
VC_A0262	1	20	0.05	3	0.1
VC_A0299	1	34	0.029	3	0.1
VC_A0546	1	43	0.023	3	0.1
VC_A0590	2	47	0.043	3	0.1
VC_A0744	1	62	0.016	3	0
VC_A0927	1	17	0.059	3	0.2
VC_A1070	1	9	0.111	3	0.3
IG_VC_0020	1	15	0.067	2	0.1
IG_VC_0068	1	11	0.091	2	0.2
IG_VC_0079	1	1	1	2	2
IG_VC_0178	1	76	0.013	2	0
IG_VC_0424	1	47	0.021	2	0
IG_VC_0449	1	60	0.017	2	0
IG_VC_0490	1	69	0.014	2	0
IG_VC_0511	1	21	0.048	2	0.1
IG_VC_0538	1	30	0.033	2	0.1
IG_VC_0597	1	10	0.1	2	0.2
IG_VC_0665	2	24	0.083	2	0.1
IG_VC_0731	1	24	0.042	2	0.1
IG_VC_0758	1	17	0.059	2	0.1
IG_VC_0894	1	16	0.062	2	0.1
IG_VC_1034	1	31	0.032	2	0.1
IG_VC_1140	1	15	0.067	2	0.1
IG_VC_1292	1	20	0.05	2	0.1
IG_VC_1296	1	40	0.025	2	0.1
IG_VC_1298	1	5	0.2	2	0.4
IG_VC_1299	1	35	0.029	2	0.1
IG_VC_1326	1	1	1	2	2
IG_VC_1572	1	36	0.028	2	0.1
IG_VC_1590	1	7	0.143	2	0.3
IG_VC_1704	1	19	0.053	2	0.1
IG_VC_1845	1	34	0.029	2	0.1
IG_VC_1935	1	5	0.2	2	0.4
IG_VC_2002	1	28	0.036	2	0.1
IG_VC_2020	1	3	0.333	2	0.7
IG_VC_2042	2	34	0.059	2	0.1
IG_VC_2106	1	24	0.042	2	0.1
IG_VC_2175	1	39	0.026	2	0.1
IG_VC_2264	1	6	0.167	2	0.3
IG_VC_2323	1	14	0.071	2	0.1
IG_VC_2328	1	13	0.077	2	0.2
IG_VC_2334	1	11	0.091	2	0.2
IG_VC_2372	1	3	0.333	2	0.7
IG_VC_2416	1	40	0.025	2	0.1
IG_VC_2521	1	4	0.25	2	0.5
IG_VC_2522	1	11	0.091	2	0.2
IG_VC_2642	1	13	0.077	2	0.2
IG_VC_2709	1	9	0.111	2	0.2
IG_VC_A0047	1	5	0.2	2	0.4
IG_VC_A0161.1	1	43	0.023	2	0
IG_VC_A0178	1	17	0.059	2	0.1
IG_VC_A0383	2	58	0.034	2	0
IG_VC_A0390	1	15	0.067	2	0.1
IG_VC_A0391	2	39	0.051	2	0.1
IG_VC_A0418	2	39	0.051	2	0.1
IG_VC_A0422	1	13	0.077	2	0.2
IG_VC_A0434	1	8	0.125	2	0.2
IG_VC_A0466	2	22	0.091	2	0.1
IG_VC_A0523	1	18	0.056	2	0.1
IG_VC_A0700	1	19	0.053	2	0.1
IG_VC_A0832	1	21	0.048	2	0.1
IG_VC_A0900	1	22	0.045	2	0.1
IG_VC_A1012	1	15	0.067	2	0.1
IG_VC_A1057	1	30	0.033	2	0.1
IG_VC_A1068	1	15	0.067	2	0.1
VC_0016	1	19	0.053	2	0.1
VC_0018	1	25	0.04	2	0.1
VC_0033	1	42	0.024	2	0
VC_0054	1	23	0.043	2	0.1
VC_0067	1	72	0.014	2	0
VC_0072	1	88	0.011	2	0
VC_0116	1	70	0.014	2	0
VC_0124	1	12	0.083	2	0.2
VC_0145	1	12	0.083	2	0.2
VC_0185	1	90	0.011	2	0
VC_0187	1	39	0.026	2	0.1
VC_0267	1	32	0.031	2	0.1
VC_0276	1	49	0.02	2	0
VC_0291	1	35	0.029	2	0.1
VC_0299	1	26	0.038	2	0.1
VC_0397	1	24	0.042	2	0.1
VC_0411	1	34	0.029	2	0.1
VC_0421	1	34	0.029	2	0.1
VC_0460	1	24	0.042	2	0.1
VC_0488	1	48	0.021	2	0
VC_0512	2	108	0.019	2	0
VC_0532	1	23	0.043	2	0.1
VC_0588	1	8	0.125	2	0.2
VC_0601	1	66	0.015	2	0
VC_0631	1	50	0.02	2	0
VC_0632	1	87	0.011	2	0
VC_0648	1	50	0.02	2	0
VC_0687	1	66	0.015	2	0
VC_0729	1	5	0.2	2	0.4
VC_0743	1	89	0.011	2	0
VC_0748	1	49	0.02	2	0
VC_0763	1	62	0.016	2	0
VC_0786	2	47	0.043	2	0
VC_0820	1	300	0.003	2	0
VC_0826	1	46	0.022	2	0
VC_0845	1	374	0.003	2	0
VC_0847	1	59	0.017	2	0
VC_0862	1	19	0.053	2	0.1
VC_0863	1	68	0.015	2	0
VC_0868	2	14	0.143	2	0.1
VC_0870	1	31	0.032	2	0.1
VC_0944	1	33	0.03	2	0.1
VC_0983	1	34	0.029	2	0.1
VC_1017	1	33	0.03	2	0.1
VC_1071	2	46	0.043	2	0
VC_1218	1	10	0.1	2	0.2
VC_1262	1	6	0.167	2	0.3
VC_1272	1	13	0.077	2	0.2
VC_1291	1	82	0.012	2	0
VC_1297	1	57	0.018	2	0
VC_1298	1	60	0.017	2	0
VC_1302	1	30	0.033	2	0.1
VC_1376	1	81	0.012	2	0
VC_1492	1	219	0.005	2	0
VC_1496	1	112	0.009	2	0
VC_1588	1	38	0.026	2	0.1
VC_1619.1.1	1	110	0.009	2	0
VC_1634	1	56	0.018	2	0
VC_1718	1	44	0.023	2	0
VC_1727	2	53	0.038	2	0
VC_1743	1	54	0.019	2	0
VC_1766	1	107	0.009	2	0
VC_1799	1	72	0.014	2	0
VC_1866	1	118	0.008	2	0
VC_1870	1	29	0.034	2	0.1
VC_1872	1	83	0.012	2	0
VC_1881	1	5	0.2	2	0.4
VC_1981	1	21	0.048	2	0.1
VC_1993	1	71	0.014	2	0
VC_2035	1	32	0.031	2	0.1
VC_2100	1	37	0.027	2	0.1
VC_2171	1	45	0.022	2	0
VC_2214	1	62	0.016	2	0
VC_2217	1	114	0.009	2	0
VC_2253	1	44	0.023	2	0
VC_2287	1	47	0.021	2	0
VC_2310	1	10	0.1	2	0.2
VC_2388	1	19	0.053	2	0.1
VC_2476	1	20	0.05	2	0.1
VC_2477	1	9	0.111	2	0.2
VC_2489	1	36	0.028	2	0.1
VC_2501	1	65	0.015	2	0
VC_2502	1	22	0.045	2	0.1
VC_2552	1	22	0.045	2	0.1
VC_2553	1	31	0.032	2	0.1
VC_2631	1	23	0.043	2	0.1
VC_2697	1	33	0.03	2	0.1
VC_2703	1	69	0.014	2	0
VC_2721	1	22	0.045	2	0.1
VC_2760	2	44	0.045	2	0
VC_2761	1	61	0.016	2	0
VC_2765	1	41	0.024	2	0
VC_A0076	1	69	0.014	2	0
VC_A0116	1	92	0.011	2	0
VC_A0148	1	169	0.006	2	0
VC_A0156	1	17	0.059	2	0.1
VC_A0202	1	24	0.042	2	0.1
VC_A0232	1	98	0.01	2	0
VC_A0275	1	30	0.033	2	0.1
VC_A0307	1	58	0.017	2	0
VC_A0351	1	38	0.026	2	0.1
VC_A0388	1	53	0.019	2	0
VC_A0402	1	34	0.029	2	0.1
VC_A0464	2	21	0.095	2	0.1
VC_A0493	1	30	0.033	2	0.1
VC_A0497	1	24	0.042	2	0.1
VC_A0655	1	68	0.015	2	0
VC_A0753	1	59	0.017	2	0
VC_A0754	1	40	0.025	2	0.1
VC_A0889	1	36	0.028	2	0.1
VC_A0890	1	18	0.056	2	0.1
VC_A0913	1	34	0.029	2	0.1
VC_A0953	1	9	0.111	2	0.2
VC_A1027	1	45	0.022	2	0
VC_A1111	1	21	0.048	2	0.1
IG_VC_0032	1	36	0.028	1	0
IG_VC_0152	1	16	0.062	1	0.1
IG_VC_0158	1	31	0.032	1	0
IG_VC_0163	1	10	0.1	1	0.1
IG_VC_0176	1	44	0.023	1	0
IG_VC_0273	1	15	0.067	1	0.1
IG_VC_0320	1	2	0.5	1	0.5
IG_VC_0443	1	5	0.2	1	0.2
IG_VC_0450	1	39	0.026	1	0
IG_VC_0595	1	6	0.167	1	0.2
IG_VC_0647	1	30	0.033	1	0
IG_VC_0681	1	6	0.167	1	0.2
IG_VC_0756	1	18	0.056	1	0.1
IG_VC_0855	1	15	0.067	1	0.1
IG_VC_0908	1	21	0.048	1	0
IG_VC_0965	1	12	0.083	1	0.1
IG_VC_0981	1	20	0.05	1	0.1
IG_VC_1038	1	11	0.091	1	0.1
IG_VC_1166	1	20	0.05	1	0.1
IG_VC_1236	1	20	0.05	1	0.1
IG_VC_1269	1	13	0.077	1	0.1
IG_VC_1539	1	35	0.029	1	0
IG_VC_1635	1	29	0.034	1	0
IG_VC_1669	1	8	0.125	1	0.1
IG_VC_2231	1	26	0.038	1	0
IG_VC_2276	1	8	0.125	1	0.1
IG_VC_2286	1	5	0.2	1	0.2
IG_VC_2287	1	17	0.059	1	0.1
IG_VC_2409	1	1	1	1	1
IG_VC_2423	1	15	0.067	1	0.1
IG_VC_2702	1	10	0.1	1	0.1
IG_VC_2718	1	5	0.2	1	0.2
IG_VC_A0015	1	15	0.067	1	0.1
IG_VC_A0076	1	22	0.045	1	0
IG_VC_A0131	1	9	0.111	1	0.1
IG_VC_A0179	1	37	0.027	1	0
IG_VC_A0254	1	24	0.042	1	0
IG_VC_A0293	1	7	0.143	1	0.1
IG_VC_A0300	1	8	0.125	1	0.1
IG_VC_A0302	1	7	0.143	1	0.1
IG_VC_A0304	1	11	0.091	1	0.1
IG_VC_A0307	1	12	0.083	1	0.1
IG_VC_A0308	1	8	0.125	1	0.1
IG_VC_A0313	1	16	0.062	1	0.1
IG_VC_A0316	1	6	0.167	1	0.2
IG_VC_A0317	1	4	0.25	1	0.2
IG_VC_A0318	1	10	0.1	1	0.1
IG_VC_A0322	1	8	0.125	1	0.1
IG_VC_A0323	1	6	0.167	1	0.2
IG_VC_A0329	1	7	0.143	1	0.1
IG_VC_A0338	1	5	0.2	1	0.2
IG_VC_A0339	1	10	0.1	1	0.1
IG_VC_A0340	1	15	0.067	1	0.1
IG_VC_A0341	1	6	0.167	1	0.2
IG_VC_A0342	1	8	0.125	1	0.1
IG_VC_A0343	1	7	0.143	1	0.1
IG_VC_A0345	1	6	0.167	1	0.2
IG_VC_A0352	1	15	0.067	1	0.1
IG_VC_A0357	1	28	0.036	1	0
IG_VC_A0358	1	12	0.083	1	0.1
IG_VC_A0365	1	7	0.143	1	0.1
IG_VC_A0374	1	6	0.167	1	0.2
IG_VC_A0376	1	12	0.083	1	0.1
IG_VC_A0381	1	10	0.1	1	0.1
IG_VC_A0387	1	14	0.071	1	0.1
IG_VC_A0389	1	14	0.071	1	0.1
IG_VC_A0396	1	10	0.1	1	0.1
IG_VC_A0398	1	5	0.2	1	0.2
IG_VC_A0401	1	7	0.143	1	0.1
IG_VC_A0403	1	7	0.143	1	0.1
IG_VC_A0404	1	13	0.077	1	0.1
IG_VC_A0405	1	17	0.059	1	0.1
IG_VC_A0406	1	7	0.143	1	0.1
IG_VC_A0407	1	13	0.077	1	0.1
IG_VC_A0408	1	7	0.143	1	0.1
IG_VC_A0410	1	8	0.125	1	0.1
IG_VC_A0413	1	9	0.111	1	0.1
IG_VC_A0415	1	6	0.167	1	0.2
IG_VC_A0417	1	17	0.059	1	0.1
IG_VC_A0425	1	13	0.077	1	0.1
IG_VC_A0426	1	8	0.125	1	0.1
IG_VC_A0429	1	17	0.059	1	0.1
IG_VC_A0433	1	8	0.125	1	0.1
IG_VC_A0437	1	12	0.083	1	0.1
IG_VC_A0439	1	13	0.077	1	0.1
IG_VC_A0446	1	22	0.045	1	0
IG_VC_A0450	1	6	0.167	1	0.2
IG_VC_A0451	1	7	0.143	1	0.1
IG_VC_A0461	1	6	0.167	1	0.2
IG_VC_A0463	1	70	0.014	1	0
IG_VC_A0465	1	8	0.125	1	0.1
IG_VC_A0467	1	21	0.048	1	0
IG_VC_A0479	1	5	0.2	1	0.2
IG_VC_A0480	1	15	0.067	1	0.1
IG_VC_A0481	1	14	0.071	1	0.1
IG_VC_A0485	1	5	0.2	1	0.2
IG_VC_A0490	1	6	0.167	1	0.2
IG_VC_A0492	1	4	0.25	1	0.2
IG_VC_A0495	1	8	0.125	1	0.1
IG_VC_A0499	1	4	0.25	1	0.2
IG_VC_A0501	1	15	0.067	1	0.1
IG_VC_A0558	1	22	0.045	1	0
IG_VC_A0604	1	18	0.056	1	0.1
IG_VC_A0673	1	5	0.2	1	0.2
IG_VC_A0735	1	16	0.062	1	0.1
IG_VC_A0869	1	30	0.033	1	0
IG_VC_A0907	1	26	0.038	1	0
IG_VC_A1006	1	8	0.125	1	0.1
IG_VC_A1035	1	9	0.111	1	0.1
VC_0023	1	15	0.067	1	0.1
VC_0065	1	27	0.037	1	0
VC_0078	1	24	0.042	1	0
VC_0083	1	34	0.029	1	0
VC_0084	1	16	0.062	1	0.1
VC_0098	1	64	0.016	1	0
VC_0140	1	19	0.053	1	0.1
VC_0142	1	18	0.056	1	0.1
VC_0144	1	32	0.031	1	0
VC_0170	1	61	0.016	1	0
VC_0175	1	108	0.009	1	0
VC_0206	1	33	0.03	1	0
VC_0226	1	6	0.167	1	0.2
VC_0235	1	49	0.02	1	0
VC_0238	1	48	0.021	1	0
VC_0258	1	70	0.014	1	0
VC_0280	1	51	0.02	1	0
VC_0281	1	86	0.012	1	0
VC_0306	1	17	0.059	1	0.1
VC_0334	1	47	0.021	1	0
VC_0378	1	23	0.043	1	0
VC_0403	1	27	0.037	1	0
VC_0431	1	29	0.034	1	0
VC_0455	1	43	0.023	1	0
VC_0458	1	10	0.1	1	0.1
VC_0574	1	76	0.013	1	0
VC_0611	1	52	0.019	1	0
VC_0613	1	87	0.011	1	0
VC_0614	1	35	0.029	1	0
VC_0616	1	37	0.027	1	0
VC_0633	1	76	0.013	1	0
VC_0635	1	12	0.083	1	0.1
VC_0662	1	56	0.018	1	0
VC_0663	1	53	0.019	1	0
VC_0690	1	30	0.033	1	0
VC_0692	1	33	0.03	1	0
VC_0697	1	25	0.04	1	0
VC_0711	1	88	0.011	1	0
VC_0720	1	50	0.02	1	0
VC_0723	1	96	0.01	1	0
VC_0767	1	58	0.017	1	0
VC_0775	1	62	0.016	1	0
VC_0781	1	46	0.022	1	0
VC_0783	1	92	0.011	1	0
VC_0795	1	69	0.014	1	0
VC_0806	1	56	0.018	1	0
VC_0846	1	54	0.019	1	0
VC_0869	1	121	0.008	1	0
VC_0874	1	10	0.1	1	0.1
VC_0928	1	56	0.018	1	0
VC_0958	1	75	0.013	1	0
VC_0972	1	69	0.014	1	0
VC_0977	1	48	0.021	1	0
VC_0980	1	45	0.022	1	0
VC_0997	1	78	0.013	1	0
VC_1024	1	38	0.026	1	0
VC_1043	1	86	0.012	1	0
VC_1074	1	38	0.026	1	0
VC_1090	1	12	0.083	1	0.1
VC_1173	1	19	0.053	1	0.1
VC_1182	1	40	0.025	1	0
VC_1232	1	33	0.03	1	0
VC_1234	1	56	0.018	1	0
VC_1235	1	60	0.017	1	0
VC_1240	1	23	0.043	1	0
VC_1244	1	39	0.026	1	0
VC_1248	1	56	0.018	1	0
VC_1266	1	38	0.026	1	0
VC_1267	1	42	0.024	1	0
VC_1304	1	60	0.017	1	0
VC_1360	1	60	0.017	1	0
VC_1515	1	16	0.062	1	0.1
VC_1549	1	65	0.015	1	0
VC_1552	1	51	0.02	1	0
VC_1575	1	30	0.033	1	0
VC_1652	1	84	0.012	1	0
VC_1668	1	30	0.033	1	0
VC_1674	1	35	0.029	1	0
VC_1754	1	84	0.012	1	0
VC_1755	1	24	0.042	1	0
VC_1845	1	47	0.021	1	0
VC_1851	1	57	0.018	1	0
VC_1899	1	71	0.014	1	0
VC_1927	1	60	0.017	1	0
VC_1933	1	26	0.038	1	0
VC_1941	1	72	0.014	1	0
VC_1976	1	47	0.021	1	0
VC_2007	1	61	0.016	1	0
VC_2030	1	121	0.008	1	0
VC_2037	1	76	0.013	1	0
VC_2074	1	72	0.014	1	0
VC_2108	1	56	0.018	1	0
VC_2187	1	44	0.023	1	0
VC_2275	1	20	0.05	1	0.1
VC_2330	1	50	0.02	1	0
VC_2339	1	49	0.02	1	0
VC_2343	1	53	0.019	1	0
VC_2358	1	31	0.032	1	0
VC_2385	1	111	0.009	1	0
VC_2415	1	29	0.034	1	0
VC_2425	1	56	0.018	1	0
VC_2481	1	58	0.017	1	0
VC_2507	1	52	0.019	1	0
VC_2520	1	33	0.03	1	0
VC_2536	1	16	0.062	1	0.1
VC_2545	1	23	0.043	1	0
VC_2562	1	93	0.011	1	0
VC_2569	1	22	0.045	1	0
VC_2607	1	19	0.053	1	0.1
VC_2618	1	44	0.023	1	0
VC_2635	1	106	0.009	1	0
VC_2638	1	53	0.019	1	0
VC_2645	1	47	0.021	1	0
VC_2683	1	42	0.024	1	0
VC_2722	1	30	0.033	1	0
VC_2748	1	38	0.026	1	0
VC_2758	1	74	0.014	1	0
VC_2772	1	31	0.032	1	0
VC_A0070	1	39	0.026	1	0
VC_A0105	1	10	0.1	1	0.1
VC_A0115	1	30	0.033	1	0
VC_A0146	1	78	0.013	1	0
VC_A0184	1	6	0.167	1	0.2
VC_A0198	1	75	0.013	1	0
VC_A0199	1	163	0.006	1	0
VC_A0211	1	90	0.011	1	0
VC_A0267	1	78	0.013	1	0
VC_A0277	1	12	0.083	1	0.1
VC_A0282	1	29	0.034	1	0
VC_A0359	1	13	0.077	1	0.1
VC_A0360	1	27	0.037	1	0
VC_A0367	1	72	0.014	1	0
VC_A0376	1	29	0.034	1	0
VC_A0377	1	5	0.2	1	0.2
VC_A0379	1	29	0.034	1	0
VC_A0380	1	30	0.033	1	0
VC_A0395	1	49	0.02	1	0
VC_A0397	1	36	0.028	1	0
VC_A0420	1	17	0.059	1	0.1
VC_A0424	1	19	0.053	1	0.1
VC_A0468	1	17	0.059	1	0.1
VC_A0472	1	29	0.034	1	0
VC_A0502	1	8	0.125	1	0.1
VC_A0557	1	78	0.013	1	0
VC_A0630	1	34	0.029	1	0
VC_A0676	1	12	0.083	1	0.1
VC_A0732	1	15	0.067	1	0.1
VC_A0773	1	43	0.023	1	0
VC_A0813	1	65	0.015	1	0
VC_A0821	1	8	0.125	1	0.1
VC_A0846	1	37	0.027	1	0
VC_A0873	1	71	0.014	1	0
VC_A0884	1	64	0.016	1	0
VC_A0896	1	63	0.016	1	0
VC_A0916	1	4	0.25	1	0.2
VC_A0935	1	21	0.048	1	0
VC_A0957	1	26	0.038	1	0
VC_A0962	1	65	0.015	1	0
VC_A0963	1	54	0.019	1	0
VC_A0985	1	99	0.01	1	0
VC_A0990	1	47	0.021	1	0
VC_A1016	1	15	0.067	1	0.1
VC_A1026	1	52	0.019	1	0
VC_A1056	1	115	0.009	1	0
VC_A1062	1	59	0.017	1	0
VC_A1063	1	89	0.011	1	0
IG_1	0	24	0	0	0
IG_VC_0003	0	1	0	0	0
IG_VC_0004	0	3	0	0	0
IG_VC_0007	0	1	0	0	0
IG_VC_0008	0	10	0	0	0
IG_VC_0010	0	6	0	0	0
IG_VC_0011	0	16	0	0	0
IG_VC_0012	0	3	0	0	0
IG_VC_0013	0	5	0	0	0
IG_VC_0014	0	3	0	0	0
IG_VC_0015	0	1	0	0	0
IG_VC_0016	0	19	0	0	0
IG_VC_0018	0	18	0	0	0
IG_VC_0019	0	3	0	0	0
IG_VC_0022	0	14	0	0	0
IG_VC_0023	0	8	0	0	0
IG_VC_0024	0	5	0	0	0
IG_VC_0025	0	11	0	0	0
IG_VC_0026	0	8	0	0	0
IG_VC_0027	0	14	0	0	0
IG_VC_0033	0	6	0	0	0
IG_VC_0034	0	2	0	0	0
IG_VC_0035	0	1	0	0	0
IG_VC_0037	0	24	0	0	0
IG_VC_0038	0	6	0	0	0
IG_VC_0039	0	17	0	0	0
IG_VC_0040	0	5	0	0	0
IG_VC_0041	0	2	0	0	0
IG_VC_0045	0	3	0	0	0
IG_VC_0046	0	2	0	0	0
IG_VC_0047	0	4	0	0	0
IG_VC_0049	0	1	0	0	0
IG_VC_0051	0	6	0	0	0
IG_VC_0056	0	3	0	0	0
IG_VC_0061	0	20	0	0	0
IG_VC_0067	0	12	0	0	0
IG_VC_0069	0	4	0	0	0
IG_VC_0070	0	8	0	0	0
IG_VC_0071	0	8	0	0	0
IG_VC_0072	0	5	0	0	0
IG_VC_0074	0	5	0	0	0
IG_VC_0075	0	2	0	0	0
IG_VC_0076	0	3	0	0	0
IG_VC_0077	0	4	0	0	0
IG_VC_0078	0	1	0	0	0
IG_VC_0080	0	6	0	0	0
IG_VC_0082	0	8	0	0	0
IG_VC_0083	0	1	0	0	0
IG_VC_0084	0	1	0	0	0
IG_VC_0086	0	3	0	0	0
IG_VC_0088	0	7	0	0	0
IG_VC_0089	0	20	0	0	0
IG_VC_0090	0	7	0	0	0
IG_VC_0091	0	5	0	0	0
IG_VC_0092	0	1	0	0	0
IG_VC_0093	0	12	0	0	0
IG_VC_0094	0	2	0	0	0
IG_VC_0096	0	2	0	0	0
IG_VC_0097	0	5	0	0	0
IG_VC_0098	0	3	0	0	0
IG_VC_0099	0	16	0	0	0
IG_VC_0100	0	1	0	0	0
IG_VC_0101	0	6	0	0	0
IG_VC_0102	0	7	0	0	0
IG_VC_0103	0	9	0	0	0
IG_VC_0104	0	2	0	0	0
IG_VC_0106	0	7	0	0	0
IG_VC_0107	0	30	0	0	0
IG_VC_0108	0	6	0	0	0
IG_VC_0110	0	17	0	0	0
IG_VC_0111	0	16	0	0	0
IG_VC_0112	0	8	0	0	0
IG_VC_0113	0	10	0	0	0
IG_VC_0116	0	3	0	0	0
IG_VC_0117	0	1	0	0	0
IG_VC_0120	0	4	0	0	0
IG_VC_0121	0	11	0	0	0
IG_VC_0123	0	6	0	0	0
IG_VC_0125	0	3	0	0	0
IG_VC_0130	0	9	0	0	0
IG_VC_0131	0	2	0	0	0
IG_VC_0134	0	3	0	0	0
IG_VC_0135	0	5	0	0	0
IG_VC_0136	0	2	0	0	0
IG_VC_0138	0	1	0	0	0
IG_VC_0139	0	4	0	0	0
IG_VC_0140	0	16	0	0	0
IG_VC_0141	0	4	0	0	0
IG_VC_0142	0	3	0	0	0
IG_VC_0143	0	42	0	0	0
IG_VC_0144	0	12	0	0	0
IG_VC_0145	0	3	0	0	0
IG_VC_0147	0	13	0	0	0
IG_VC_0150	0	6	0	0	0
IG_VC_0151	0	16	0	0	0
IG_VC_0153	0	2	0	0	0
IG_VC_0154	0	1	0	0	0
IG_VC_0157	0	4	0	0	0
IG_VC_0160	0	26	0	0	0
IG_VC_0162	0	11	0	0	0
IG_VC_0164	0	9	0	0	0
IG_VC_0168	0	5	0	0	0
IG_VC_0169	0	88	0	0	0
IG_VC_0170	0	5	0	0	0
IG_VC_0171	0	1	0	0	0
IG_VC_0172	0	4	0	0	0
IG_VC_0174	0	11	0	0	0
IG_VC_0175	0	18	0	0	0
IG_VC_0177	0	13	0	0	0
IG_VC_0179	0	1	0	0	0
IG_VC_0182	0	3	0	0	0
IG_VC_0186	0	8	0	0	0
IG_VC_0187	0	5	0	0	0
IG_VC_0188	0	22	0	0	0
IG_VC_0189	0	2	0	0	0
IG_VC_0191	0	29	0	0	0
IG_VC_0192	0	3	0	0	0
IG_VC_0193	0	4	0	0	0
IG_VC_0194	0	1	0	0	0
IG_VC_0195	0	12	0	0	0
IG_VC_0198	0	13	0	0	0
IG_VC_0199	0	1	0	0	0
IG_VC_0200	0	7	0	0	0
IG_VC_0201	0	1	0	0	0
IG_VC_0205	0	5	0	0	0
IG_VC_0208	0	6	0	0	0
IG_VC_0209	0	6	0	0	0
IG_VC_0210	0	7	0	0	0
IG_VC_0211	0	20	0	0	0
IG_VC_0212	0	5	0	0	0
IG_VC_0215	0	6	0	0	0
IG_VC_0216	0	8	0	0	0
IG_VC_0217	0	4	0	0	0
IG_VC_0220	0	15	0	0	0
IG_VC_0222	0	5	0	0	0
IG_VC_0223	0	6	0	0	0
IG_VC_0224	0	5	0	0	0
IG_VC_0225	0	5	0	0	0
IG_VC_0228	0	1	0	0	0
IG_VC_0229	0	1	0	0	0
IG_VC_0239	0	1	0	0	0
IG_VC_0240	0	13	0	0	0
IG_VC_0244	0	1	0	0	0
IG_VC_0248	0	6	0	0	0
IG_VC_0249	0	2	0	0	0
IG_VC_0252	0	5	0	0	0
IG_VC_0253	0	11	0	0	0
IG_VC_0254	0	18	0	0	0
IG_VC_0255	0	13	0	0	0
IG_VC_0256	0	1	0	0	0
IG_VC_0259	0	5	0	0	0
IG_VC_0264	0	6	0	0	0
IG_VC_0265	0	12	0	0	0
IG_VC_0266	0	5	0	0	0
IG_VC_0269	0	29	0	0	0
IG_VC_0271	0	24	0	0	0
IG_VC_0275	0	6	0	0	0
IG_VC_0276	0	3	0	0	0
IG_VC_0277	0	15	0	0	0
IG_VC_0278	0	18	0	0	0
IG_VC_0279	0	21	0	0	0
IG_VC_0280	0	10	0	0	0
IG_VC_0281	0	1	0	0	0
IG_VC_0282	0	5	0	0	0
IG_VC_0283	0	6	0	0	0
IG_VC_0285	0	14	0	0	0
IG_VC_0286	0	1	0	0	0
IG_VC_0287	0	15	0	0	0
IG_VC_0289	0	3	0	0	0
IG_VC_0290	0	12	0	0	0
IG_VC_0291	0	2	0	0	0
IG_VC_0293	0	4	0	0	0
IG_VC_0295	0	7	0	0	0
IG_VC_0298	0	21	0	0	0
IG_VC_0299	0	7	0	0	0
IG_VC_0302	0	6	0	0	0
IG_VC_0303	0	2	0	0	0
IG_VC_0304	0	12	0	0	0
IG_VC_0307	0	19	0	0	0
IG_VC_0308	0	5	0	0	0
IG_VC_0309	0	7	0	0	0
IG_VC_0313	0	15	0	0	0
IG_VC_0314	0	4	0	0	0
IG_VC_0318	0	2	0	0	0
IG_VC_0321	0	34	0	0	0
IG_VC_0322	0	10	0	0	0
IG_VC_0323	0	3	0	0	0
IG_VC_0324	0	10	0	0	0
IG_VC_0325	0	1	0	0	0
IG_VC_0326	0	20	0	0	0
IG_VC_0327	0	6	0	0	0
IG_VC_0328	0	10	0	0	0
IG_VC_0329	0	6	0	0	0
IG_VC_0330	0	6	0	0	0
IG_VC_0331	0	11	0	0	0
IG_VC_0332	0	17	0	0	0
IG_VC_0333	0	1	0	0	0
IG_VC_0334	0	4	0	0	0
IG_VC_0336	0	8	0	0	0
IG_VC_0337	0	13	0	0	0
IG_VC_0338	0	2	0	0	0
IG_VC_0339	0	9	0	0	0
IG_VC_0341	0	15	0	0	0
IG_VC_0343	0	7	0	0	0
IG_VC_0348	0	2	0	0	0
IG_VC_0349	0	5	0	0	0
IG_VC_0351	0	4	0	0	0
IG_VC_0352	0	2	0	0	0
IG_VC_0354	0	8	0	0	0
IG_VC_0355	0	12	0	0	0
IG_VC_0358	0	1	0	0	0
IG_VC_0359	0	14	0	0	0
IG_VC_0360	0	8	0	0	0
IG_VC_0361	0	6	0	0	0
IG_VC_0362	0	9	0	0	0
IG_VC_0363	0	8	0	0	0
IG_VC_0364	0	6	0	0	0
IG_VC_0365	0	6	0	0	0
IG_VC_0366	0	15	0	0	0
IG_VC_0368	0	1	0	0	0
IG_VC_0369	0	3	0	0	0
IG_VC_0370	0	4	0	0	0
IG_VC_0371	0	9	0	0	0
IG_VC_0373	0	1	0	0	0
IG_VC_0374	0	20	0	0	0
IG_VC_0375	0	3	0	0	0
IG_VC_0376	0	5	0	0	0
IG_VC_0377	0	3	0	0	0
IG_VC_0379	0	25	0	0	0
IG_VC_0381	0	6	0	0	0
IG_VC_0384	0	8	0	0	0
IG_VC_0387	0	12	0	0	0
IG_VC_0388	0	4	0	0	0
IG_VC_0390	0	10	0	0	0
IG_VC_0391	0	3	0	0	0
IG_VC_0392	0	17	0	0	0
IG_VC_0393	0	6	0	0	0
IG_VC_0394	0	3	0	0	0
IG_VC_0395	0	11	0	0	0
IG_VC_0396	0	7	0	0	0
IG_VC_0398	0	11	0	0	0
IG_VC_0399	0	1	0	0	0
IG_VC_0402	0	2	0	0	0
IG_VC_0403	0	1	0	0	0
IG_VC_0407	0	1	0	0	0
IG_VC_0408	0	9	0	0	0
IG_VC_0409	0	1	0	0	0
IG_VC_0410	0	5	0	0	0
IG_VC_0415	0	7	0	0	0
IG_VC_0416	0	4	0	0	0
IG_VC_0419	0	1	0	0	0
IG_VC_0420	0	1	0	0	0
IG_VC_0423	0	4	0	0	0
IG_VC_0425	0	10	0	0	0
IG_VC_0426	0	1	0	0	0
IG_VC_0431	0	25	0	0	0
IG_VC_0432	0	10	0	0	0
IG_VC_0433	0	32	0	0	0
IG_VC_0434	0	8	0	0	0
IG_VC_0435	0	17	0	0	0
IG_VC_0436	0	2	0	0	0
IG_VC_0437	0	15	0	0	0
IG_VC_0438	0	3	0	0	0
IG_VC_0440	0	1	0	0	0
IG_VC_0441	0	7	0	0	0
IG_VC_0446	0	5	0	0	0
IG_VC_0447	0	8	0	0	0
IG_VC_0453	0	13	0	0	0
IG_VC_0454	0	4	0	0	0
IG_VC_0455	0	12	0	0	0
IG_VC_0457	0	3	0	0	0
IG_VC_0460	0	2	0	0	0
IG_VC_0461	0	2	0	0	0
IG_VC_0462	0	3	0	0	0
IG_VC_0463	0	2	0	0	0
IG_VC_0464	0	5	0	0	0
IG_VC_0465	0	5	0	0	0
IG_VC_0466	0	1	0	0	0
IG_VC_0467	0	5	0	0	0
IG_VC_0469	0	1	0	0	0
IG_VC_0470	0	9	0	0	0
IG_VC_0471	0	10	0	0	0
IG_VC_0472	0	8	0	0	0
IG_VC_0473	0	24	0	0	0
IG_VC_0474	0	4	0	0	0
IG_VC_0475	0	16	0	0	0
IG_VC_0476	0	2	0	0	0
IG_VC_0477	0	8	0	0	0
IG_VC_0478	0	7	0	0	0
IG_VC_0479	0	14	0	0	0
IG_VC_0480	0	1	0	0	0
IG_VC_0481	0	7	0	0	0
IG_VC_0482	0	17	0	0	0
IG_VC_0483	0	5	0	0	0
IG_VC_0484	0	28	0	0	0
IG_VC_0485	0	4	0	0	0
IG_VC_0486	0	27	0	0	0
IG_VC_0487	0	8	0	0	0
IG_VC_0488	0	4	0	0	0
IG_VC_0489	0	14	0	0	0
IG_VC_0493	0	18	0	0	0
IG_VC_0495	0	4	0	0	0
IG_VC_0496	0	5	0	0	0
IG_VC_0497	0	5	0	0	0
IG_VC_0498	0	4	0	0	0
IG_VC_0499	0	7	0	0	0
IG_VC_0500	0	2	0	0	0
IG_VC_0501	0	37	0	0	0
IG_VC_0502	0	34	0	0	0
IG_VC_0504	0	18	0	0	0
IG_VC_0505	0	4	0	0	0
IG_VC_0506	0	1	0	0	0
IG_VC_0507	0	7	0	0	0
IG_VC_0509	0	2	0	0	0
IG_VC_0513	0	146	0	0	0
IG_VC_0515	0	13	0	0	0
IG_VC_0516	0	53	0	0	0
IG_VC_0517	0	33	0	0	0
IG_VC_0518	0	9	0	0	0
IG_VC_0519	0	1	0	0	0
IG_VC_0520	0	3	0	0	0
IG_VC_0521	0	11	0	0	0
IG_VC_0522	0	12	0	0	0
IG_VC_0523	0	1	0	0	0
IG_VC_0524	0	12	0	0	0
IG_VC_0527	0	5	0	0	0
IG_VC_0530	0	3	0	0	0
IG_VC_0535	0	4	0	0	0
IG_VC_0536	0	1	0	0	0
IG_VC_0537	0	6	0	0	0
IG_VC_0539	0	4	0	0	0
IG_VC_0540	0	1	0	0	0
IG_VC_0542	0	10	0	0	0
IG_VC_0544	0	3	0	0	0
IG_VC_0545	0	10	0	0	0
IG_VC_0546	0	4	0	0	0
IG_VC_0547	0	2	0	0	0
IG_VC_0548	0	7	0	0	0
IG_VC_0549	0	93	0	0	0
IG_VC_0550	0	3	0	0	0
IG_VC_0552	0	2	0	0	0
IG_VC_0556	0	3	0	0	0
IG_VC_0557	0	3	0	0	0
IG_VC_0558	0	4	0	0	0
IG_VC_0559	0	4	0	0	0
IG_VC_0560	0	19	0	0	0
IG_VC_0561	0	12	0	0	0
IG_VC_0562	0	7	0	0	0
IG_VC_0563	0	2	0	0	0
IG_VC_0564	0	7	0	0	0
IG_VC_0565	0	4	0	0	0
IG_VC_0566	0	10	0	0	0
IG_VC_0567	0	7	0	0	0
IG_VC_0568	0	14	0	0	0
IG_VC_0570	0	7	0	0	0
IG_VC_0573	0	14	0	0	0
IG_VC_0576	0	7	0	0	0
IG_VC_0578	0	2	0	0	0
IG_VC_0583	0	11	0	0	0
IG_VC_0586	0	2	0	0	0
IG_VC_0587	0	14	0	0	0
IG_VC_0588	0	7	0	0	0
IG_VC_0589	0	9	0	0	0
IG_VC_0591	0	2	0	0	0
IG_VC_0592	0	1	0	0	0
IG_VC_0596	0	1	0	0	0
IG_VC_0599	0	1	0	0	0
IG_VC_0603	0	11	0	0	0
IG_VC_0604	0	12	0	0	0
IG_VC_0605	0	8	0	0	0
IG_VC_0606	0	11	0	0	0
IG_VC_0608	0	7	0	0	0
IG_VC_0609	0	10	0	0	0
IG_VC_0611	0	4	0	0	0
IG_VC_0612	0	7	0	0	0
IG_VC_0613	0	6	0	0	0
IG_VC_0616	0	2	0	0	0
IG_VC_0617	0	2	0	0	0
IG_VC_0620	0	8	0	0	0
IG_VC_0621	0	38	0	0	0
IG_VC_0623	0	3	0	0	0
IG_VC_0624	0	2	0	0	0
IG_VC_0625	0	3	0	0	0
IG_VC_0626	0	1	0	0	0
IG_VC_0627	0	18	0	0	0
IG_VC_0628	0	8	0	0	0
IG_VC_0630	0	5	0	0	0
IG_VC_0632	0	5	0	0	0
IG_VC_0633	0	4	0	0	0
IG_VC_0634	0	37	0	0	0
IG_VC_0635	0	3	0	0	0
IG_VC_0636	0	14	0	0	0
IG_VC_0637	0	16	0	0	0
IG_VC_0638	0	5	0	0	0
IG_VC_0639	0	2	0	0	0
IG_VC_0640	0	14	0	0	0
IG_VC_0642	0	1	0	0	0
IG_VC_0644	0	6	0	0	0
IG_VC_0646	0	8	0	0	0
IG_VC_0648	0	8	0	0	0
IG_VC_0649	0	6	0	0	0
IG_VC_0650	0	9	0	0	0
IG_VC_0651	0	2	0	0	0
IG_VC_0653	0	6	0	0	0
IG_VC_0656	0	6	0	0	0
IG_VC_0659	0	14	0	0	0
IG_VC_0660	0	8	0	0	0
IG_VC_0661	0	7	0	0	0
IG_VC_0662	0	28	0	0	0
IG_VC_0663	0	15	0	0	0
IG_VC_0664	0	2	0	0	0
IG_VC_0666	0	33	0	0	0
IG_VC_0667	0	1	0	0	0
IG_VC_0668	0	7	0	0	0
IG_VC_0669	0	20	0	0	0
IG_VC_0674	0	4	0	0	0
IG_VC_0675	0	2	0	0	0
IG_VC_0676	0	7	0	0	0
IG_VC_0677	0	31	0	0	0
IG_VC_0678	0	13	0	0	0
IG_VC_0679	0	4	0	0	0
IG_VC_0680	0	15	0	0	0
IG_VC_0682	0	3	0	0	0
IG_VC_0683	0	2	0	0	0
IG_VC_0684	0	10	0	0	0
IG_VC_0685	0	4	0	0	0
IG_VC_0688	0	17	0	0	0
IG_VC_0689	0	1	0	0	0
IG_VC_0690	0	1	0	0	0
IG_VC_0691	0	1	0	0	0
IG_VC_0692	0	5	0	0	0
IG_VC_0693	0	2	0	0	0
IG_VC_0694	0	1	0	0	0
IG_VC_0695	0	20	0	0	0
IG_VC_0696	0	1	0	0	0
IG_VC_0697	0	1	0	0	0
IG_VC_0698	0	5	0	0	0
IG_VC_0699	0	12	0	0	0
IG_VC_0700	0	8	0	0	0
IG_VC_0702	0	2	0	0	0
IG_VC_0705	0	14	0	0	0
IG_VC_0706	0	15	0	0	0
IG_VC_0707	0	19	0	0	0
IG_VC_0711	0	8	0	0	0
IG_VC_0712	0	16	0	0	0
IG_VC_0716	0	1	0	0	0
IG_VC_0718	0	7	0	0	0
IG_VC_0719	0	13	0	0	0
IG_VC_0720	0	2	0	0	0
IG_VC_0722	0	1	0	0	0
IG_VC_0724	0	17	0	0	0
IG_VC_0725	0	1	0	0	0
IG_VC_0726	0	1	0	0	0
IG_VC_0727	0	3	0	0	0
IG_VC_0728	0	2	0	0	0
IG_VC_0729	0	3	0	0	0
IG_VC_0730	0	3	0	0	0
IG_VC_0732	0	20	0	0	0
IG_VC_0733	0	20	0	0	0
IG_VC_0734	0	17	0	0	0
IG_VC_0736	0	4	0	0	0
IG_VC_0737	0	7	0	0	0
IG_VC_0738	0	6	0	0	0
IG_VC_0739	0	5	0	0	0
IG_VC_0742	0	5	0	0	0
IG_VC_0743	0	1	0	0	0
IG_VC_0744	0	2	0	0	0
IG_VC_0745	0	11	0	0	0
IG_VC_0746	0	7	0	0	0
IG_VC_0747	0	9	0	0	0
IG_VC_0748	0	2	0	0	0
IG_VC_0749	0	3	0	0	0
IG_VC_0750	0	4	0	0	0
IG_VC_0751	0	2	0	0	0
IG_VC_0754	0	4	0	0	0
IG_VC_0755	0	8	0	0	0
IG_VC_0757	0	11	0	0	0
IG_VC_0760	0	3	0	0	0
IG_VC_0761	0	2	0	0	0
IG_VC_0763	0	16	0	0	0
IG_VC_0764	0	3	0	0	0
IG_VC_0765	0	25	0	0	0
IG_VC_0767	0	16	0	0	0
IG_VC_0768	0	7	0	0	0
IG_VC_0769	0	20	0	0	0
IG_VC_0770	0	15	0	0	0
IG_VC_0772	0	6	0	0	0
IG_VC_0773	0	1	0	0	0
IG_VC_0774	0	10	0	0	0
IG_VC_0776	0	13	0	0	0
IG_VC_0779	0	4	0	0	0
IG_VC_0781	0	2	0	0	0
IG_VC_0783	0	9	0	0	0
IG_VC_0784	0	5	0	0	0
IG_VC_0785	0	23	0	0	0
IG_VC_0787	0	7	0	0	0
IG_VC_0788	0	9	0	0	0
IG_VC_0789	0	11	0	0	0
IG_VC_0792	0	6	0	0	0
IG_VC_0795	0	4	0	0	0
IG_VC_0796	0	27	0	0	0
IG_VC_0797	0	4	0	0	0
IG_VC_0802	0	30	0	0	0
IG_VC_0803	0	3	0	0	0
IG_VC_0804	0	12	0	0	0
IG_VC_0805	0	4	0	0	0
IG_VC_0806	0	4	0	0	0
IG_VC_0807	0	1	0	0	0
IG_VC_0810	0	16	0	0	0
IG_VC_0811	0	37	0	0	0
IG_VC_0812	0	11	0	0	0
IG_VC_0814	0	28	0	0	0
IG_VC_0816	0	15	0	0	0
IG_VC_0817	0	30	0	0	0
IG_VC_0818	0	3	0	0	0
IG_VC_0819	0	39	0	0	0
IG_VC_0820	0	9	0	0	0
IG_VC_0821	0	16	0	0	0
IG_VC_0822	0	13	0	0	0
IG_VC_0824	0	16	0	0	0
IG_VC_0825	0	24	0	0	0
IG_VC_0826	0	53	0	0	0
IG_VC_0829	0	11	0	0	0
IG_VC_0831	0	1	0	0	0
IG_VC_0834	0	1	0	0	0
IG_VC_0837	0	2	0	0	0
IG_VC_0838	0	28	0	0	0
IG_VC_0840	0	1	0	0	0
IG_VC_0841	0	1	0	0	0
IG_VC_0842	0	2	0	0	0
IG_VC_0843	0	2	0	0	0
IG_VC_0845	0	21	0	0	0
IG_VC_0846	0	69	0	0	0
IG_VC_0847	0	41	0	0	0
IG_VC_0848	0	41	0	0	0
IG_VC_0849	0	9	0	0	0
IG_VC_0851	0	1	0	0	0
IG_VC_0852	0	3	0	0	0
IG_VC_0853	0	13	0	0	0
IG_VC_0854	0	7	0	0	0
IG_VC_0857	0	1	0	0	0
IG_VC_0858	0	6	0	0	0
IG_VC_0862	0	1	0	0	0
IG_VC_0864	0	3	0	0	0
IG_VC_0865	0	2	0	0	0
IG_VC_0866	0	12	0	0	0
IG_VC_0870	0	10	0	0	0
IG_VC_0871	0	7	0	0	0
IG_VC_0873	0	6	0	0	0
IG_VC_0874	0	2	0	0	0
IG_VC_0877	0	2	0	0	0
IG_VC_0878	0	1	0	0	0
IG_VC_0880	0	14	0	0	0
IG_VC_0881	0	3	0	0	0
IG_VC_0883	0	28	0	0	0
IG_VC_0884	0	2	0	0	0
IG_VC_0887	0	7	0	0	0
IG_VC_0889	0	3	0	0	0
IG_VC_0892	0	21	0	0	0
IG_VC_0893	0	1	0	0	0
IG_VC_0895	0	15	0	0	0
IG_VC_0896	0	13	0	0	0
IG_VC_0897	0	2	0	0	0
IG_VC_0898	0	1	0	0	0
IG_VC_0899	0	1	0	0	0
IG_VC_0900	0	22	0	0	0
IG_VC_0902	0	2	0	0	0
IG_VC_0903	0	2	0	0	0
IG_VC_0905	0	7	0	0	0
IG_VC_0909	0	4	0	0	0
IG_VC_0910	0	14	0	0	0
IG_VC_0911	0	5	0	0	0
IG_VC_0912	0	25	0	0	0
IG_VC_0913	0	14	0	0	0
IG_VC_0915	0	4	0	0	0
IG_VC_0916	0	34	0	0	0
IG_VC_0923	0	1	0	0	0
IG_VC_0928	0	20	0	0	0
IG_VC_0929	0	23	0	0	0
IG_VC_0930	0	20	0	0	0
IG_VC_0931	0	8	0	0	0
IG_VC_0932	0	11	0	0	0
IG_VC_0934	0	53	0	0	0
IG_VC_0935	0	6	0	0	0
IG_VC_0937	0	3	0	0	0
IG_VC_0940	0	13	0	0	0
IG_VC_0942	0	7	0	0	0
IG_VC_0943	0	8	0	0	0
IG_VC_0945	0	17	0	0	0
IG_VC_0948	0	7	0	0	0
IG_VC_0953	0	5	0	0	0
IG_VC_0956	0	2	0	0	0
IG_VC_0958	0	4	0	0	0
IG_VC_0959	0	4	0	0	0
IG_VC_0960	0	8	0	0	0
IG_VC_0962	0	5	0	0	0
IG_VC_0963	0	18	0	0	0
IG_VC_0964	0	7	0	0	0
IG_VC_0966	0	8	0	0	0
IG_VC_0967	0	9	0	0	0
IG_VC_0968	0	1	0	0	0
IG_VC_0969	0	11	0	0	0
IG_VC_0970	0	12	0	0	0
IG_VC_0971	0	12	0	0	0
IG_VC_0972	0	48	0	0	0
IG_VC_0973	0	5	0	0	0
IG_VC_0974	0	2	0	0	0
IG_VC_0975	0	3	0	0	0
IG_VC_0977	0	35	0	0	0
IG_VC_0978	0	9	0	0	0
IG_VC_0979	0	7	0	0	0
IG_VC_0980	0	4	0	0	0
IG_VC_0982	0	3	0	0	0
IG_VC_0983	0	3	0	0	0
IG_VC_0985	0	13	0	0	0
IG_VC_0986	0	23	0	0	0
IG_VC_0987	0	10	0	0	0
IG_VC_0988	0	4	0	0	0
IG_VC_0989	0	18	0	0	0
IG_VC_0990	0	3	0	0	0
IG_VC_0991	0	8	0	0	0
IG_VC_0992	0	14	0	0	0
IG_VC_0993	0	14	0	0	0
IG_VC_0994	0	1	0	0	0
IG_VC_0995	0	35	0	0	0
IG_VC_0996	0	10	0	0	0
IG_VC_0997	0	2	0	0	0
IG_VC_0998	0	7	0	0	0
IG_VC_0999	0	9	0	0	0
IG_VC_1000	0	11	0	0	0
IG_VC_1001	0	6	0	0	0
IG_VC_1003	0	3	0	0	0
IG_VC_1004	0	1	0	0	0
IG_VC_1005	0	4	0	0	0
IG_VC_1006	0	4	0	0	0
IG_VC_1007	0	2	0	0	0
IG_VC_1008	0	5	0	0	0
IG_VC_1009	0	2	0	0	0
IG_VC_1010	0	8	0	0	0
IG_VC_1012	0	1	0	0	0
IG_VC_1018	0	52	0	0	0
IG_VC_1021	0	22	0	0	0
IG_VC_1024	0	26	0	0	0
IG_VC_1025	0	3	0	0	0
IG_VC_1028	0	1	0	0	0
IG_VC_1029	0	2	0	0	0
IG_VC_1030	0	7	0	0	0
IG_VC_1031	0	2	0	0	0
IG_VC_1035	0	5	0	0	0
IG_VC_1036	0	12	0	0	0
IG_VC_1039	0	4	0	0	0
IG_VC_1040	0	5	0	0	0
IG_VC_1041	0	5	0	0	0
IG_VC_1042	0	1	0	0	0
IG_VC_1043	0	25	0	0	0
IG_VC_1044	0	19	0	0	0
IG_VC_1046	0	22	0	0	0
IG_VC_1049	0	7	0	0	0
IG_VC_1050	0	20	0	0	0
IG_VC_1051	0	13	0	0	0
IG_VC_1053	0	5	0	0	0
IG_VC_1054	0	1	0	0	0
IG_VC_1055	0	2	0	0	0
IG_VC_1056	0	1	0	0	0
IG_VC_1057	0	6	0	0	0
IG_VC_1058	0	9	0	0	0
IG_VC_1059	0	3	0	0	0
IG_VC_1060	0	9	0	0	0
IG_VC_1061	0	6	0	0	0
IG_VC_1062	0	4	0	0	0
IG_VC_1064	0	10	0	0	0
IG_VC_1065	0	3	0	0	0
IG_VC_1066	0	5	0	0	0
IG_VC_1067	0	8	0	0	0
IG_VC_1068	0	31	0	0	0
IG_VC_1069	0	6	0	0	0
IG_VC_1070	0	2	0	0	0
IG_VC_1071	0	2	0	0	0
IG_VC_1072	0	12	0	0	0
IG_VC_1073	0	23	0	0	0
IG_VC_1074	0	5	0	0	0
IG_VC_1075	0	19	0	0	0
IG_VC_1076	0	1	0	0	0
IG_VC_1078	0	5	0	0	0
IG_VC_1079	0	2	0	0	0
IG_VC_1080	0	20	0	0	0
IG_VC_1082	0	3	0	0	0
IG_VC_1084	0	2	0	0	0
IG_VC_1085	0	1	0	0	0
IG_VC_1087	0	2	0	0	0
IG_VC_1088	0	1	0	0	0
IG_VC_1090	0	3	0	0	0
IG_VC_1091	0	34	0	0	0
IG_VC_1092	0	8	0	0	0
IG_VC_1093	0	3	0	0	0
IG_VC_1094	0	1	0	0	0
IG_VC_1096	0	6	0	0	0
IG_VC_1097	0	8	0	0	0
IG_VC_1098	0	12	0	0	0
IG_VC_1099	0	22	0	0	0
IG_VC_1100	0	7	0	0	0
IG_VC_1101	0	38	0	0	0
IG_VC_1102	0	6	0	0	0
IG_VC_1104	0	11	0	0	0
IG_VC_1105	0	2	0	0	0
IG_VC_1106	0	11	0	0	0
IG_VC_1107	0	7	0	0	0
IG_VC_1110	0	1	0	0	0
IG_VC_1111	0	4	0	0	0
IG_VC_1112	0	14	0	0	0
IG_VC_1116	0	5	0	0	0
IG_VC_1117	0	16	0	0	0
IG_VC_1118	0	19	0	0	0
IG_VC_1120	0	1	0	0	0
IG_VC_1126	0	6	0	0	0
IG_VC_1127	0	4	0	0	0
IG_VC_1128	0	2	0	0	0
IG_VC_1129	0	15	0	0	0
IG_VC_1130	0	2	0	0	0
IG_VC_1131	0	62	0	0	0
IG_VC_1131.1	0	14	0	0	0
IG_VC_1132	0	7	0	0	0
IG_VC_1134	0	1	0	0	0
IG_VC_1135	0	1	0	0	0
IG_VC_1137	0	1	0	0	0
IG_VC_1141	0	3	0	0	0
IG_VC_1142	0	4	0	0	0
IG_VC_1144	0	2	0	0	0
IG_VC_1145	0	3	0	0	0
IG_VC_1146	0	14	0	0	0
IG_VC_1147	0	14	0	0	0
IG_VC_1148	0	4	0	0	0
IG_VC_1149	0	18	0	0	0
IG_VC_1150	0	4	0	0	0
IG_VC_1151	0	8	0	0	0
IG_VC_1152	0	1	0	0	0
IG_VC_1153	0	30	0	0	0
IG_VC_1154	0	8	0	0	0
IG_VC_1155	0	13	0	0	0
IG_VC_1158	0	11	0	0	0
IG_VC_1159	0	3	0	0	0
IG_VC_1160	0	3	0	0	0
IG_VC_1163	0	14	0	0	0
IG_VC_1164	0	10	0	0	0
IG_VC_1165	0	7	0	0	0
IG_VC_1167	0	4	0	0	0
IG_VC_1168	0	5	0	0	0
IG_VC_1169	0	11	0	0	0
IG_VC_1171	0	3	0	0	0
IG_VC_1176	0	3	0	0	0
IG_VC_1177	0	9	0	0	0
IG_VC_1179	0	7	0	0	0
IG_VC_1180	0	6	0	0	0
IG_VC_1182	0	12	0	0	0
IG_VC_1185	0	20	0	0	0
IG_VC_1186	0	7	0	0	0
IG_VC_1189	0	28	0	0	0
IG_VC_1190	0	12	0	0	0
IG_VC_1191	0	5	0	0	0
IG_VC_1192	0	7	0	0	0
IG_VC_1193	0	5	0	0	0
IG_VC_1194	0	10	0	0	0
IG_VC_1195	0	3	0	0	0
IG_VC_1196	0	5	0	0	0
IG_VC_1197	0	9	0	0	0
IG_VC_1198	0	10	0	0	0
IG_VC_1200	0	18	0	0	0
[truncated: 4,642 more rows]
