# Supplementary material for: BipA exerts temperature-dependent translational control of biofilm-associated colony morphology in Vibrio cholerae
Source: eLife. 2021 Feb 16;10:e60607. doi: 10.7554/eLife.60607 (PMC7886329; doi:10.7554/eLife.60607)
Supplement: Supplementary file 6. [file elife-60607-supp6.xlsx]

## Sheet: Hoja3
Tnseq library Vc C6706 rugose colonies at 37ºC: mutated genes ordered by total reads/clone
OBS! Only genes with number of genes per clone >1 are considered as candidates
Locus	# of hit TAs	Total TAs	Fraction TAs hit	Total reads	Avg_Reads per TA	Reads per colony	Gene/Function
VC_0420	30	146	0.205	43672	299.1	280.885	hypothetical protein (Possible exported protein or membrane protein)
VC_2344	36	110	0.327	36510	331.9	234.821	hypothetical protein (pilus assembly protein PilZ)
VC_2135	14	67	0.209	30565	456.2	196.585	Fis family transcriptional regulator (orthology with two-component system, response regulator FlrC, FlrB-FlrC (polar flagellar synthesis) two-component regulatory system)
VC_2069	22	86	0.256	30399	353.5	195.517	Flagellar biosynthesis protein flhA
VC_2197	22	74	0.297	29732	401.8	191.227	flagellar hook protein FlgE
VC_2191	25	78	0.321	27851	357.1	179.129	flgM (Hook associated protein)
VC_2140	15	63	0.238	26384	418.8	169.694	fliD flagellar capping protein
VC_2068	19	58	0.328	26114	450.2	167.957	flagellar biosynthesis regulator FlhF
VC_2133	17	65	0.262	25834	397.4	166.156	putative Flagellar M-ring protein fliF
VC_2627	13	59	0.22	25275	428.4	162.561	putative DamX-related protein
VC_2132	11	29	0.379	21488	741	138.204	flagellar motor switch protein FliG
VC_0653	20	81	0.247	19140	236.3	123.103	putative EAL,GGDEF and PAS domains carrying protein
VC_2130	8	45	0.178	18925	420.6	121.72	fliI flagellum-specific ATP synthase
VC_2194	13	35	0.371	18438	526.8	118.588	putative Flagellar L-ring protein FlgH
VC_2137	14	54	0.259	17200	318.5	110.625	flrA (Sigma 54 transcriptional activator)
VC_2190	17	60	0.283	16414	273.6	105.57	Flagellar hook-associated protein FlgL
VC_A0002	2	83	0.024	15620	188.2	100.463	hypothetical protein (orthology with translation elongation factor)
VC_0998	21	165	0.127	15506	94	99.7299	hubP polar transmembrane protein
VC_2156	8	45	0.178	14353	319	92.3141	putative Lipoprotein-34 NlpB
VC_2174	5	80	0.062	13913	173.9	89.4842	Protein UshA [Includes: UDP-sugar hydrolase ; 5'-nucleotidase]
VC_2126	9	33	0.273	12829	388.8	82.5122	flagellar motor switch protein FliM
VC_2138	8	22	0.364	12826	583	82.4929	Flagellar protein FlaJ
VC_0303	11	144	0.076	12542	87.1	80.6663	putative sensor histidine kinase
VC_2199	8	23	0.348	12517	544.2	80.5055	putative Flagellar basal-body rod protein FlgC
VC_0900	14	70	0.2	12330	176.1	79.3028	putative ATPase involved in DNA repair fused with GGDEF family protein
VC_2188	10	41	0.244	12314	300.3	79.1999	flaA Flagellin A
VC_2123	9	35	0.257	12174	347.8	78.2995	flagellar biosynthesis protein FliP
VC_0003	9	51	0.176	11955	234.4	76.8909	tRNA modification GTPase TrmE
VC_2208	13	51	0.255	11686	229.1	75.1608	hypothetical protein (orthology with flagellar protein FlgT)
VC_0274	10	37	0.27	11649	314.8	74.9228	hypothetical protein (orthology with peptidyl-prolyl cis-trans isomerase)
VC_2136	6	32	0.188	11574	361.7	74.4404	sensory box sensor histidine kinase (orthology with two-component system, sensor histidine kinase FlrB)
VC_2121	8	33	0.242	9635	292	61.9694	flagellar biosynthesis protein FliR
VC_2128	15	58	0.259	8928	153.9	57.4222	putative Flagellar hook-length control protein fliK
VC_2125	5	16	0.312	8858	553.6	56.972	Flagellar motor switch protein fliN
IG_VC_0654	6	23	0.261	7869	342.1	50.611	VC0654 putative lipid carrier protein; VC0653 c-di-GMP phosphodiesterase A-like protein
VC_2067	5	48	0.104	7679	160	49.389	MinD-like protein (orthology with flagellar biosynthesis protein FlhG)
IG_VC_0584	3	18	0.167	7672	426.2	49.344	VC0584 no entry; VC0583 hapR; VC0585 hypoxanthine-guanine phosphoribosyltransferase
IG_VC_0641	2	28	0.071	7558	269.9	48.6108	VC0641 Ribosome maturation factor rimP; VC0642 preprotein translocase subunit SecG
VC_2775	9	71	0.127	7353	103.6	47.2923	gidA (tRNA uridine 5-carboxymethylaminomethyl modification enzyme mnmG)
VC_2058	6	13	0.462	7318	562.9	47.0671	DNA repair protein
VC_2193	7	35	0.2	7056	201.6	45.382	flgI Flagellar P-ring protein
VC_2200	6	25	0.24	6852	274.1	44.07	putative Flagellar basal-body rod protein FlgB
VC_0122	9	105	0.086	6800	64.8	43.7355	cyaA adenylate cyclase
VC_2195	12	33	0.364	6147	186.3	39.5356	Flagellar basal-body rod protein flgG
VC_2134	3	13	0.231	6106	469.7	39.2719	Flagellar hook-basal body complex protein fliE
VC_2205	7	19	0.368	5946	312.9	38.2429	flagella synthesis protein FlgN
VC_2139	5	17	0.294	5631	331.2	36.2169	putative flagellar FliT protein
VC_0390	2	157	0.013	5522	35.2	35.5158	metH Methionine synthase
VC_2203	5	32	0.156	5462	170.7	35.1299	putative Flagellar basal-body P-ring formation protein flgA
VC_1050	4	46	0.087	5425	117.9	34.8919	putative Response regulator
VC_2606	1	69	0.014	5221	75.7	33.5799	Glutathione-regulated potassium-efflux system protein kefB
VC_2120	10	38	0.263	4636	122	29.8173	Flagellar biosynthetic protein flhB
VC_2066	8	37	0.216	4229	114.3	27.1996	fliA RNA polymerase sigma factor for flagellar operon
VC_A0631	1	24	0.042	4106	171.1	26.4085	putative Acetyltransferase
IG_VC_2196	2	3	0.667	4044	1348	26.0098	VC2196 flagellar basal body rod protein FlgF
VC_2131	3	25	0.12	3992	159.7	25.6753	flagellar assembly protein FliH
VC_2129	5	17	0.294	3842	226	24.7106	fliJ flagellar biosynthesis chaperone
VC_2206	3	22	0.136	3810	173.2	24.5048	flagellar protein FlgP
VC_2750	22	139	0.158	3701	26.6	23.8037	putative EAL and GGDEF domains family protein
VC_A0920	6	29	0.207	3645	125.7	23.4435	putative Leucine-rich repeat protein
VC_2756	6	68	0.088	3583	52.7	23.0448	potassium uptake protein TrkH
VC_0127	1	28	0.036	3311	118.2	21.2953	conserved hypothetical protein (orthology with 3',5'-cyclic-nucleotide phosphodiesterase)
VC_1596	1	48	0.021	3300	68.8	21.2246	galT galactose-1-phosphate uridylyltransferase
VC_0703	19	115	0.165	3228	28.1	20.7615	Biofilm architecture maintenance protein mbaA
VC_2207	6	32	0.188	3061	95.7	19.6874	flagellar protein FlgO
VC_2018	1	43	0.023	2977	69.2	19.1472	pabC Aminodeoxychorismate lyase
VC_1348	4	67	0.06	2933	43.8	18.8642	putative two-component system response regulator
VC_2124	3	14	0.214	2824	201.7	18.1631	putative Flagellar biosynthesis protein fliO
VC_A0805	1	66	0.015	2819	42.7	18.1309	rnb Exoribonuclease 2
VC_2005	4	19	0.211	2811	147.9	18.0795	hypothetical protein
VC_2122	4	13	0.308	2704	208	17.3913	flagellar biosynthesis protein FliQ
IG_VC_A0142	1	18	0.056	2698	149.9	17.3527	VCA0142 dctD C4-dicarboxylate transport transcriptional regulatory protein; VCA0141 C4-dicarboxylate transport sensor protein
VC_1424	4	55	0.073	2597	47.2	16.7031	potD (Spermidine/putrescine-binding periplasmic protein)
VC_A0185	1	16	0.062	2554	159.6	16.4266	conserved hypothetical protein (orthology with alternative ribosome-rescue factor)
VC_A0153	1	25	0.04	2524	101	16.2336	putative Na(+) H(+) antiporter subunit F
VC_2198	3	25	0.12	2518	100.7	16.195	putative Flagellar basal-body rod modification protein FlgD
VC_0064	1	11	0.091	2506	227.8	16.1178	sulfur carrier protein ThiS
VC_1428	4	52	0.077	2482	47.7	15.9635	potA (Spermidine/putrescine import ATP-binding protein potA)
VC_1427	3	53	0.057	2410	45.5	15.5004	potB (Spermidine/putrescine transport system permease protein potB)
VC_A0589	1	46	0.022	2402	52.2	15.4489	peptide ABC transporter permease (orthology with microcin C transport system permease protein)
IG_VC_2040	1	8	0.125	2285	285.6	14.6964	VC2039 nucleoid-associated protein NdpA; VC2040 hypothetical protein
VC_1871	1	22	0.045	2154	97.9	13.8539	conserved hypothetical protein
VC_0911	1	74	0.014	2140	28.9	13.7638	treA (Trehalose-6-phosphate hydrolase)
VC_1145	1	92	0.011	2135	23.2	13.7317	putative TrkA, Potassium channel-family protein
IG_VC_0178	2	76	0.026	2118	27.9	13.6223	VC0178 putative FabD/lysophospholipase-like; VC0177 hypothetical protein
VC_1073	2	120	0.017	2105	17.5	13.5387	putative Chitodextrinase precursor
VC_A0567	3	56	0.054	1993	35.6	12.8184	hypothetical protein (orthology with copper-sensing two-component system resp)
VC_1579	1	86	0.012	1989	23.1	12.7926	putative D-alanine:D-alanyl carrier protein ligase (DltA)
VC_A0510	1	160	0.006	1976	12.3	12.709	hypothetical protein (orthology with nucleotide pyrophosphatase)
VC_0212	1	34	0.029	1890	55.6	12.1559	putative Lipid A biosynthesis (KDO)2-(lauroyl)-lipid IVA acyltransferase
VC_0499	1	46	0.022	1874	40.7	12.053	pseudogene
VC_0992	1	82	0.012	1791	21.8	11.5192	putative Kef-type K+ transport system
IG_VC_2192	4	16	0.25	1786	111.6	11.487	VC2192 Peptidoglycan hydrolase flgJ
VC_1231	2	34	0.059	1736	51.1	11.1654	cytidine deaminase
VC_1885	1	18	0.056	1702	94.6	10.9467	hypothetical protein
VC_2523	1	34	0.029	1702	50.1	10.9467	kdsD (Arabinose 5-phosphate isomerase)
VC_0583	3	23	0.13	1687	73.3	10.8503	hapR
VC_1782	1	51	0.02	1617	31.7	10.4001	putative N-acetylmannosamine kinase
VC_1605	2	69	0.029	1573	22.8	10.1171	putative Sensor kinase CitA, DpiB
IG_VC_A0346	2	15	0.133	1562	104.1	10.0463	VCA0346 H-REV 107-like protein; VCA0345 hypothetical protein
VC_0687	1	66	0.015	1557	23.6	10.0141	putative Carbon starvation protein A
VC_A0131	1	34	0.029	1506	44.3	9.68613	ribokinase
VC_2600	2	90	0.022	1499	16.7	9.64111	putative Membrane sulphatase
VC_1588	2	38	0.053	1461	38.4	9.39671	putative Transcriptional regulator of alpha-acetolactate operon alsR
VC_1639	1	56	0.018	1455	26	9.35812	putative Sensor histidine kinase
VC_1558	2	72	0.028	1413	19.6	9.08799	Aryl-phospho-beta-D-glucosidase BglA
VC_A0652	1	13	0.077	1396	107.4	8.97865	hypothetical protein (145 aa)
IG_VC_2344	1	10	0.1	1395	139.5	8.97222	VC2344 hypothetical protein; VC2343 DNA repair protein RadA
VC_2031	1	70	0.014	1395	19.9	8.97222	putative Sulfate transporter
VC_2702	1	23	0.043	1389	60.4	8.93362	putative Signal transduction response regulator fused with Transcriptional regulator, LuxR family
IG_VC_0490	2	69	0.029	1313	19	8.44482	VC0490 putative ATPase involved in DNA repair/ Chromosome segregation; VC0491 hypothetical protein
VC_2343	1	53	0.019	1281	24.2	8.239	DNA repair protein radA
VC_A0075	6	27	0.222	1228	45.5	7.89812	putative molybdopterin binding domain, Sulfite oxidase (SO), family protein
VC_0921	8	96	0.083	1203	12.5	7.73733	vpsC
VC_2699	3	50	0.06	1186	23.7	7.62799	Anaerobic C4-dicarboxylate transporter dcuA
VC_0124	1	12	0.083	1151	95.9	7.40288	pseudogene (216 nt)
VC_1448	1	106	0.009	1147	10.8	7.37715	Leukotoxin translocation ATP-binding protein lktB
VC_A0962	1	65	0.015	1133	17.4	7.28711	hypothetical protein
VC_1006	1	33	0.03	1124	34.1	7.22923	ribonuclease T
VC_2287	1	47	0.021	1124	23.9	7.22923	dinB (DNA polymerase IV)
VC_2192	4	34	0.118	1111	32.7	7.14561	Peptidoglycan hydrolase flgJ
VC_A0277	1	12	0.083	1092	91	7.02341	gcvH (Glycine cleavage system H protein)
VC_0672	1	102	0.01	1087	10.7	6.99125	Phosphoenolpyruvate-protein phosphotransferase ptsP
VC_2456	3	64	0.047	1074	16.8	6.90764	hypothetical protein
VC_A0574	1	146	0.007	1000	6.8	6.4317	putative fused acyl-CoA synthetase and Acetyltransferase
VC_1934	3	110	0.027	965	8.8	6.20659	putative GGDEF family protein
VC_A0789	1	29	0.034	959	33.1	6.168	conserved hypothetical protein (orthology with membrane protein)
IG_VC_0665	2	24	0.083	958	39.9	6.16156	VC0665 vpsR; VC0664 lysyl-tRNA synthetase
VC_0648	1	50	0.02	939	18.8	6.03936	Lipoprotein nlpI
VC_1451	6	589	0.01	930	1.6	5.98148	RTX toxin RtxA
VC_2196	2	26	0.077	916	35.2	5.89143	flagellar basal body rod protein FlgF
VC_A1027	1	45	0.022	891	19.8	5.73064	maltose operon periplasmic protein
VC_0423	1	49	0.02	888	18.1	5.71135	arcA (Arginine deiminase)
VC_1771	2	246	0.008	887	3.6	5.70491	hypothetical protein
VC_0072	1	88	0.011	886	10.1	5.69848	sensory box/GGDEF family protein
VC_A0884	1	64	0.016	862	13.5	5.54412	conserved hypothetical protein
IG_VC_0965	2	12	0.167	849	70.8	5.46051	VC0965 ptsI Phosphoenolpyruvate-protein phosphotransferase; VC0966 ptsH phosphocarrier protein HPr
IG_VC_2630	2	15	0.133	830	55.3	5.33831	VC2630 type IV pilus assembly protein PilQ; VC2631 fimbrial assembly protein PilP
VC_0389	1	71	0.014	780	11	5.01672	putative Na+/H+ antiporter
VC_2232	1	62	0.016	762	12.3	4.90095	hypothetical protein (orthology with glutamate synthase)
VC_0480	1	41	0.024	742	18.1	4.77232	mscS (Small-conductance mechanosensitive channel)
VC_2059	5	24	0.208	726	30.2	4.66941	purine-binding chemotaxis protein CheW
VC_2339	1	49	0.02	711	14.5	4.57294	putative Chromate transport protein ChrA
VC_A0655	1	68	0.015	669	9.8	4.3028	putative sucrose-6-phosphate hydrolase
VC_1951	1	48	0.021	644	13.4	4.14201	Cytochrome c-type protein torY
VC_0801	1	40	0.025	640	16	4.11629	citG (2-(5''-triphosphoribosyl)-3'-dephosphocoenzyme-A synthase)
IG_VC_1372	1	34	0.029	633	18.6	4.07126	VC1372 putative GGDEF family protein; VC1371 hypothetical protein
IG_VC_2287	1	17	0.059	629	37	4.04554	VC2287 dinB DNA polymerase IV; VC2288 hypothetical protein (putative exported or periplasmic protein)
VC_0179	1	78	0.013	621	8	3.99408	hypothetical protein
VC_0140	1	19	0.053	611	32.2	3.92977	hypothetical protein (orthology with RNA polymerase subunit sigma)
VC_A0014	1	76	0.013	601	7.9	3.86545	malQ (4-alpha-glucanotransferase)
IG_VC_1562	2	9	0.222	583	64.8	3.74968	VC1562 beta-lactamase-like protein; VC1561 LysR family transcriptional regulator
VC_A0590	2	47	0.043	579	12.3	3.72395	putative ABC-type dipeptide/oligopeptide/nickel transport systems, permease component
VC_2182	1	30	0.033	577	19.2	3.71109	ispE (4-diphosphocytidyl-2-C-methyl-D-erythritol kinase)
VC_0613	1	87	0.011	576	6.6	3.70466	beta-N-acetylhexosaminidase
VC_2142	2	44	0.045	575	13.1	3.69822	flaD (Polar flagellin B/D)
VC_2330	2	50	0.04	573	11.5	3.68536	putative NnrS protein involved in response to NO
VC_A0709	1	103	0.01	569	5.5	3.65963	putative TMAO reductase sytem sensor TorS
VC_1552	1	51	0.02	566	11.1	3.64034	ugpC (glycerol-3-phosphate transporter ATP-binding subunit)
VC_0980	1	45	0.022	553	12.3	3.55673	putative Cell division inhibitor
VC_A0913	1	34	0.029	547	16.1	3.51814	TonB system transport protein ExbD1
VC_0903	1	21	0.048	546	26	3.51171	SecY interacting protein Syd
VC_0121	2	9	0.222	541	60.1	3.47955	hypothetical protein (48 aa, only orthologs in Vibrio)
VC_1656	1	34	0.029	540	15.9	3.47312	hypothetical protein (orthology with permease of the drug/metabolite transporte)
VC_2341	2	86	0.023	513	6	3.29946	putative Long-chain-fatty-acid--CoA ligase
VC_0633	2	76	0.026	498	6.6	3.20298	ompU Outer membrane protein U
VC_2143	1	43	0.023	492	11.4	3.16439	flaD (Polar flagellin B/D)
VC_2187	1	44	0.023	492	11.2	3.16439	flaD Polar flagellin B/D
VC_0786	2	47	0.043	466	9.9	2.99717	dadA (D-amino acid dehydrogenase small subunit)
VC_1024	2	38	0.053	456	12	2.93285	moaA (Molybdenum cofactor biosynthesis protein A)
VC_1304	2	60	0.033	446	7.4	2.86854	putative fumarate hydratase class I, aerobic
VC_1206	1	31	0.032	440	14.2	2.82995	hutC (histidine utilization repressor)
IG_VC_1772	1	3	0.333	430	143.3	2.76563	VC1772 putative transcriptional regulator; VC1771 hypothetical protein
VC_2417	2	52	0.038	426	8.2	2.7399	Single-stranded-DNA-specific exonuclease recJ
IG_VC_A0076	1	22	0.045	421	19.1	2.70774	VCA0076 putative Nucleoside/arginine uptake transporter; VCA0077 sulfate permease
VC_0458	1	10	0.1	403	40.3	2.59197	hypothetical protein (96 aa)
VC_1235	1	60	0.017	399	6.7	2.56625	putative Na+/H+-dicarboxylate symporter
IG_VC_1901	1	52	0.019	384	7.4	2.46977	VC1901 Na(+)/H(+) antiporter nhaB; VC1900 fatty acid metabolism regulator
VC_0018	1	25	0.04	368	14.7	2.36686	Small heat shock protein ibpA
VC_0999	2	34	0.059	368	10.8	2.36686	truA (tRNA pseudouridine synthase A)
VC_1774	1	75	0.013	364	4.9	2.34114	N-acetylneuraminate epimerase
IG_VC_2457	1	9	0.111	362	40.2	2.32827
VC_0575	1	30	0.033	361	12	2.32184	putative cytochrome c1
VC_A0818	1	55	0.018	347	6.3	2.2318	putative Mg/Co/Ni transporter MgtE
IG_VC_0894	2	16	0.125	333	20.8	2.14175
IG_VC_1299	1	35	0.029	329	9.4	2.11603
IG_VC_2175	1	39	0.026	329	8.4	2.11603
IG_VC_A0554	1	12	0.083	329	27.4	2.11603
IG_VC_2334	1	11	0.091	327	29.7	2.10316
VC_2223	1	49	0.02	315	6.4	2.02598	pseudouridine synthase
VC_1415	1	19	0.053	314	16.5	2.01955	hcp (Haemolysin co-regulated protein (putative Type VI secretion system effector, Hcp1))
VC_A0676	1	12	0.083	300	25	1.92951	putative Ferredoxin-type protein NapF (periplasmic nitrate reductase)
VC_A0007	1	37	0.027	294	7.9	1.89092	putative 3-hydroxyisobutyrate dehydrogenase
IG_VC_0538	2	30	0.067	291	9.7	1.87162
IG_VC_A0814	1	10	0.1	289	28.9	1.85876
VC_1302	1	30	0.033	271	9	1.74299
IG_VC_2134	1	2	0.5	269	134.5	1.73013
IG_VC_A0086	1	6	0.167	258	43	1.65938
VC_0812	1	157	0.006	256	1.6	1.64651
IG_VC_2184	1	8	0.125	251	31.4	1.61436
VC_0965	6	78	0.077	231	3	1.48572
VC_A0197	1	48	0.021	229	4.8	1.47286
VC_A0199	1	163	0.006	229	1.4	1.47286
IG_VC_0303	1	2	0.5	222	111	1.42784
VC_1893	1	37	0.027	210	5.7	1.35066
VC_0402	1	82	0.012	203	2.5	1.30563
VC_2286	1	40	0.025	195	4.9	1.25418
VC_2349	1	52	0.019	191	3.7	1.22845
IG_VC_A0546	1	33	0.03	182	5.5	1.17057
IG_VC_2286	1	5	0.2	172	34.4	1.10625
VC_1088	1	82	0.012	170	2.1	1.09339
IG_VC_2027	1	9	0.111	154	17.1	0.990481
IG_VC_1034	1	31	0.032	153	4.9	0.984049
VC_1649	2	119	0.017	148	1.2	0.951891
IG_VC_2370	1	5	0.2	144	28.8	0.926164
IG_VC_1795	1	3	0.333	127	42.3	0.816825
VC_2072	11	133	0.083	126	0.9	0.810394
IG_VC_2200	1	1	1	121	121	0.778235
IG_VC_2702	1	10	0.1	121	12.1	0.778235
VC_2535	11	59	0.186	121	2.1	0.778235
VC_A0580	1	32	0.031	118	3.7	0.75894
VC_1071	1	46	0.022	109	2.4	0.701055
VC_0901	1	131	0.008	105	0.8	0.675328
IG_VC_2212	1	26	0.038	100	3.8	0.64317
VC_1854	1	85	0.012	94	1.1	0.604579
IG_VC_2600	1	14	0.071	91	6.5	0.585284
VC_2209	5	271	0.018	89	0.3	0.572421
VC_0409	1	41	0.024	87	2.1	0.559557
VC_1901	1	79	0.013	83	1.1	0.533831
VC_1684	2	27	0.074	81	3	0.520967
IG_VC_2752	17	647	0.026	80	0.1	0.514536
VC_0777	1	45	0.022	73	1.6	0.469514
VC_2012	1	87	0.011	66	0.8	0.424492
VC_A0830	2	41	0.049	65	1.6	0.41806
VC_0422	7	57	0.123	64	1.1	0.411629
VC_0201	1	22	0.045	63	2.9	0.405197
VC_1619.1.1	5	110	0.045	60	0.5	0.385902
IG_VC_1721	1	26	0.038	58	2.2	0.373038
VC_2744	7	71	0.099	57	0.8	0.366607
VC_0704	1	60	0.017	56	0.9	0.360175
IG_VC_2291	1	4	0.25	53	13.2	0.34088
VC_1184	1	47	0.021	53	1.1	0.34088
VC_0298	1	88	0.011	50	0.6	0.321585
VC_0607	2	46	0.043	49	1.1	0.315153
VC_1516	2	83	0.024	49	0.6	0.315153
VC_2352	3	56	0.054	48	0.9	0.308721
VC_0036	3	61	0.049	44	0.7	0.282995
VC_0831	1	134	0.007	43	0.3	0.276563
VC_0723	3	96	0.031	42	0.4	0.270131
VC_1307	2	42	0.048	42	1	0.270131
VC_2726	5	42	0.119	42	1	0.270131
VC_1426	2	39	0.051	41	1.1	0.2637
VC_2127	2	18	0.111	39	2.2	0.250836
VC_0046	3	22	0.136	37	1.7	0.237973
VC_0535	6	100	0.06	37	0.4	0.237973
VC_1009	1	24	0.042	37	1.5	0.237973
VC_2063	4	112	0.036	36	0.3	0.231541
IG_VC_2138	2	15	0.133	35	2.3	0.225109
VC_0618	2	41	0.049	34	0.8	0.218678
VC_1195	1	39	0.026	34	0.9	0.218678
VC_0662	1	56	0.018	33	0.6	0.212246
VC_2376	1	145	0.007	33	0.2	0.212246
VC_0374	6	65	0.092	32	0.5	0.205814
VC_0394	3	117	0.026	32	0.3	0.205814
VC_0629	1	135	0.007	32	0.2	0.205814
IG_VC_0161	8	300	0.027	31	0.1	0.199383
IG_VC_0714	8	307	0.026	31	0.1	0.199383
IG_VC_2045	1	19	0.053	31	1.6	0.199383
VC_A0221	1	40	0.025	31	0.8	0.199383
VC_0234	3	60	0.05	30	0.5	0.192951
VC_0604	6	110	0.055	29	0.3	0.186519
VC_0726	1	42	0.024	29	0.7	0.186519
VC_2701	5	68	0.074	29	0.4	0.186519
IG_VC_2495	8	305	0.026	28	0.1	0.180087
VC_0909	1	39	0.026	28	0.7	0.180087
VC_1800	2	42	0.048	28	0.7	0.180087
VC_2290	8	63	0.127	28	0.4	0.180087
VC_A0997	1	26	0.038	28	1.1	0.180087
IG_VC_2473	1	39	0.026	27	0.7	0.173656
VC_0137	1	50	0.02	27	0.5	0.173656
VC_0200	2	101	0.02	27	0.3	0.173656
VC_1093	1	42	0.024	27	0.6	0.173656
VC_1740	3	97	0.031	27	0.3	0.173656
VC_2062	5	53	0.094	27	0.5	0.173656
VC_2371	1	47	0.021	27	0.6	0.173656
IG_VC_0060	7	315	0.022	26	0.1	0.167224
IG_VC_0315	7	305	0.023	26	0.1	0.167224
IG_VC_0389	7	329	0.021	26	0.1	0.167224
VC_0345	5	89	0.056	25	0.3	0.160792
VC_0793	2	59	0.034	25	0.4	0.160792
VC_0985	1	88	0.011	25	0.3	0.160792
VC_2008	1	51	0.02	25	0.5	0.160792
VC_2628	1	43	0.023	25	0.6	0.160792
IG_VC_2378	1	11	0.091	24	2.2	0.154361
VC_0132	1	63	0.016	24	0.4	0.154361
VC_0935	7	63	0.111	24	0.4	0.154361
VC_1023	1	26	0.038	24	0.9	0.154361
VC_1619.1	2	254	0.008	24	0.1	0.154361
VC_1722	2	32	0.062	24	0.8	0.154361
VC_2092	4	65	0.062	24	0.4	0.154361
VC_2567	1	19	0.053	24	1.3	0.154361
VC_A0108	1	52	0.019	24	0.5	0.154361
VC_0283	2	25	0.08	23	0.9	0.147929
VC_0475	2	100	0.02	23	0.2	0.147929
VC_0922	9	92	0.098	23	0.2	0.147929
VC_1067	13	127	0.102	23	0.2	0.147929
VC_A0214	2	67	0.03	23	0.3	0.147929
VC_0665	6	58	0.103	22	0.4	0.141497
VC_2716	4	71	0.056	22	0.3	0.141497
VC_A0981	1	37	0.027	22	0.6	0.141497
VC_0510	2	27	0.074	21	0.8	0.135066
VC_0650	1	72	0.014	21	0.3	0.135066
VC_1092	1	60	0.017	21	0.3	0.135066
VC_1219	1	40	0.025	21	0.5	0.135066
VC_A1057	1	24	0.042	21	0.9	0.135066
VC_0130	1	87	0.011	20	0.2	0.128634
VC_0304	9	68	0.132	20	0.3	0.128634
VC_0337	2	41	0.049	20	0.5	0.128634
VC_0917	7	51	0.137	20	0.4	0.128634
VC_2749	4	57	0.07	20	0.4	0.128634
VC_A0040	4	47	0.085	20	0.4	0.128634
IG_VC_1887	1	11	0.091	19	1.7	0.122202
VC_0047	1	44	0.023	19	0.4	0.122202
VC_0271	2	47	0.043	19	0.4	0.122202
VC_1119	1	29	0.034	19	0.7	0.122202
IG_VC_2436	1	21	0.048	18	0.9	0.115771
VC_0162	1	71	0.014	18	0.3	0.115771
VC_1361	1	69	0.014	18	0.3	0.115771
VC_2153	3	34	0.088	18	0.5	0.115771
VC_2420	1	26	0.038	18	0.7	0.115771
VC_2436	4	60	0.067	18	0.3	0.115771
VC_2671	1	62	0.016	18	0.3	0.115771
VC_A0005	1	16	0.062	18	1.1	0.115771
VC_0196	2	62	0.032	17	0.3	0.109339
VC_0544	1	22	0.045	17	0.8	0.109339
VC_0937	9	109	0.083	17	0.2	0.109339
VC_1847	2	28	0.071	17	0.6	0.109339
VC_1863	1	44	0.023	17	0.4	0.109339
VC_2618	1	44	0.023	17	0.4	0.109339
VC_2619	1	26	0.038	17	0.7	0.109339
VC_2738	2	75	0.027	17	0.2	0.109339
VC_A0120	2	147	0.014	17	0.1	0.109339
VC_A0717	1	84	0.012	17	0.2	0.109339
VC_A0758	1	32	0.031	17	0.5	0.109339
VC_A0851	1	57	0.018	17	0.3	0.109339
VC_0022	2	34	0.059	16	0.5	0.102907
VC_0068	1	53	0.019	16	0.3	0.102907
VC_0251	7	162	0.043	16	0.1	0.102907
VC_0305	10	53	0.189	16	0.3	0.102907
VC_0496	1	42	0.024	16	0.4	0.102907
VC_1108	2	60	0.033	16	0.3	0.102907
VC_1198	3	153	0.02	16	0.1	0.102907
VC_1279	2	78	0.026	16	0.2	0.102907
VC_2481	1	58	0.017	16	0.3	0.102907

## Sheet: Tnseq5res_HitFraction
Locus	# of hit TAs	Total TAs	Fraction TAs hit	Total reads	Avg_Reads per TA
VC_0420	30	146	0.205	43672	299.1
VC_2344	36	110	0.327	36510	331.9
VC_2135	14	67	0.209	30565	456.2
VC_2069	22	86	0.256	30399	353.5
VC_2197	22	74	0.297	29732	401.8
VC_2191	25	78	0.321	27851	357.1
VC_2140	15	63	0.238	26384	418.8
VC_2068	19	58	0.328	26114	450.2
VC_2133	17	65	0.262	25834	397.4
VC_2627	13	59	0.22	25275	428.4
VC_2132	11	29	0.379	21488	741
VC_0653	20	81	0.247	19140	236.3
VC_2130	8	45	0.178	18925	420.6
VC_2194	13	35	0.371	18438	526.8
VC_2137	14	54	0.259	17200	318.5
VC_2190	17	60	0.283	16414	273.6
VC_A0002	2	83	0.024	15620	188.2
VC_0998	21	165	0.127	15506	94
VC_2156	8	45	0.178	14353	319
VC_2174	5	80	0.062	13913	173.9
VC_2126	9	33	0.273	12829	388.8
VC_2138	8	22	0.364	12826	583
VC_0303	11	144	0.076	12542	87.1
VC_2199	8	23	0.348	12517	544.2
VC_0900	14	70	0.2	12330	176.1
VC_2188	10	41	0.244	12314	300.3
VC_2123	9	35	0.257	12174	347.8
VC_0003	9	51	0.176	11955	234.4
VC_2208	13	51	0.255	11686	229.1
VC_0274	10	37	0.27	11649	314.8
VC_2136	6	32	0.188	11574	361.7
VC_2121	8	33	0.242	9635	292
VC_2128	15	58	0.259	8928	153.9
VC_2125	5	16	0.312	8858	553.6
IG_VC_0654	6	23	0.261	7869	342.1
VC_2067	5	48	0.104	7679	160
IG_VC_0584	3	18	0.167	7672	426.2
IG_VC_0641	2	28	0.071	7558	269.9
VC_2775	9	71	0.127	7353	103.6
VC_2058	6	13	0.462	7318	562.9
VC_2193	7	35	0.2	7056	201.6
VC_2200	6	25	0.24	6852	274.1
VC_0122	9	105	0.086	6800	64.8
VC_2195	12	33	0.364	6147	186.3
VC_2134	3	13	0.231	6106	469.7
VC_2205	7	19	0.368	5946	312.9
VC_2139	5	17	0.294	5631	331.2
VC_0390	2	157	0.013	5522	35.2
VC_2203	5	32	0.156	5462	170.7
VC_1050	4	46	0.087	5425	117.9
VC_2606	1	69	0.014	5221	75.7
VC_2120	10	38	0.263	4636	122
VC_2066	8	37	0.216	4229	114.3
VC_A0631	1	24	0.042	4106	171.1
IG_VC_2196	2	3	0.667	4044	1348
VC_2131	3	25	0.12	3992	159.7
VC_2129	5	17	0.294	3842	226
VC_2206	3	22	0.136	3810	173.2
VC_2750	22	139	0.158	3701	26.6
VC_A0920	6	29	0.207	3645	125.7
VC_2756	6	68	0.088	3583	52.7
VC_0127	1	28	0.036	3311	118.2
VC_1596	1	48	0.021	3300	68.8
VC_0703	19	115	0.165	3228	28.1
VC_2207	6	32	0.188	3061	95.7
VC_2018	1	43	0.023	2977	69.2
VC_1348	4	67	0.06	2933	43.8
VC_2124	3	14	0.214	2824	201.7
VC_A0805	1	66	0.015	2819	42.7
VC_2005	4	19	0.211	2811	147.9
VC_2122	4	13	0.308	2704	208
IG_VC_A0142	1	18	0.056	2698	149.9
VC_1424	4	55	0.073	2597	47.2
VC_A0185	1	16	0.062	2554	159.6
VC_A0153	1	25	0.04	2524	101
VC_2198	3	25	0.12	2518	100.7
VC_0064	1	11	0.091	2506	227.8
VC_1428	4	52	0.077	2482	47.7
VC_1427	3	53	0.057	2410	45.5
VC_A0589	1	46	0.022	2402	52.2
IG_VC_2040	1	8	0.125	2285	285.6
VC_1871	1	22	0.045	2154	97.9
VC_0911	1	74	0.014	2140	28.9
VC_1145	1	92	0.011	2135	23.2
IG_VC_0178	2	76	0.026	2118	27.9
VC_1073	2	120	0.017	2105	17.5
VC_A0567	3	56	0.054	1993	35.6
VC_1579	1	86	0.012	1989	23.1
VC_A0510	1	160	0.006	1976	12.3
VC_0212	1	34	0.029	1890	55.6
VC_0499	1	46	0.022	1874	40.7
VC_0992	1	82	0.012	1791	21.8
IG_VC_2192	4	16	0.25	1786	111.6
VC_1231	2	34	0.059	1736	51.1
VC_1885	1	18	0.056	1702	94.6
VC_2523	1	34	0.029	1702	50.1
VC_0583	3	23	0.13	1687	73.3
VC_1782	1	51	0.02	1617	31.7
VC_1605	2	69	0.029	1573	22.8
IG_VC_A0346	2	15	0.133	1562	104.1
VC_0687	1	66	0.015	1557	23.6
VC_A0131	1	34	0.029	1506	44.3
VC_2600	2	90	0.022	1499	16.7
VC_1588	2	38	0.053	1461	38.4
VC_1639	1	56	0.018	1455	26
VC_1558	2	72	0.028	1413	19.6
VC_A0652	1	13	0.077	1396	107.4
IG_VC_2344	1	10	0.1	1395	139.5
VC_2031	1	70	0.014	1395	19.9
VC_2702	1	23	0.043	1389	60.4
IG_VC_0490	2	69	0.029	1313	19
VC_2343	1	53	0.019	1281	24.2
VC_A0075	6	27	0.222	1228	45.5
VC_0921	8	96	0.083	1203	12.5
VC_2699	3	50	0.06	1186	23.7
VC_0124	1	12	0.083	1151	95.9
VC_1448	1	106	0.009	1147	10.8
VC_A0962	1	65	0.015	1133	17.4
VC_1006	1	33	0.03	1124	34.1
VC_2287	1	47	0.021	1124	23.9
VC_2192	4	34	0.118	1111	32.7
VC_A0277	1	12	0.083	1092	91
VC_0672	1	102	0.01	1087	10.7
VC_2456	3	64	0.047	1074	16.8
VC_A0574	1	146	0.007	1000	6.8
VC_1934	3	110	0.027	965	8.8
VC_A0789	1	29	0.034	959	33.1
IG_VC_0665	2	24	0.083	958	39.9
VC_0648	1	50	0.02	939	18.8
VC_1451	6	589	0.01	930	1.6
VC_2196	2	26	0.077	916	35.2
VC_A1027	1	45	0.022	891	19.8
VC_0423	1	49	0.02	888	18.1
VC_1771	2	246	0.008	887	3.6
VC_0072	1	88	0.011	886	10.1
VC_A0884	1	64	0.016	862	13.5
IG_VC_0965	2	12	0.167	849	70.8
IG_VC_2630	2	15	0.133	830	55.3
VC_0389	1	71	0.014	780	11
VC_2232	1	62	0.016	762	12.3
VC_0480	1	41	0.024	742	18.1
VC_2059	5	24	0.208	726	30.2
VC_2339	1	49	0.02	711	14.5
VC_A0655	1	68	0.015	669	9.8
VC_1951	1	48	0.021	644	13.4
VC_0801	1	40	0.025	640	16
IG_VC_1372	1	34	0.029	633	18.6
IG_VC_2287	1	17	0.059	629	37
VC_0179	1	78	0.013	621	8
VC_0140	1	19	0.053	611	32.2
VC_A0014	1	76	0.013	601	7.9
IG_VC_1562	2	9	0.222	583	64.8
VC_A0590	2	47	0.043	579	12.3
VC_2182	1	30	0.033	577	19.2
VC_0613	1	87	0.011	576	6.6
VC_2142	2	44	0.045	575	13.1
VC_2330	2	50	0.04	573	11.5
VC_A0709	1	103	0.01	569	5.5
VC_1552	1	51	0.02	566	11.1
VC_0980	1	45	0.022	553	12.3
VC_A0913	1	34	0.029	547	16.1
VC_0903	1	21	0.048	546	26
VC_0121	2	9	0.222	541	60.1
VC_1656	1	34	0.029	540	15.9
VC_2341	2	86	0.023	513	6
VC_0633	2	76	0.026	498	6.6
VC_2143	1	43	0.023	492	11.4
VC_2187	1	44	0.023	492	11.2
VC_0786	2	47	0.043	466	9.9
VC_1024	2	38	0.053	456	12
VC_1304	2	60	0.033	446	7.4
VC_1206	1	31	0.032	440	14.2
IG_VC_1772	1	3	0.333	430	143.3
VC_2417	2	52	0.038	426	8.2
IG_VC_A0076	1	22	0.045	421	19.1
VC_0458	1	10	0.1	403	40.3
VC_1235	1	60	0.017	399	6.7
IG_VC_1901	1	52	0.019	384	7.4
VC_0018	1	25	0.04	368	14.7
VC_0999	2	34	0.059	368	10.8
VC_1774	1	75	0.013	364	4.9
IG_VC_2457	1	9	0.111	362	40.2
VC_0575	1	30	0.033	361	12
VC_A0818	1	55	0.018	347	6.3
IG_VC_0894	2	16	0.125	333	20.8
IG_VC_1299	1	35	0.029	329	9.4
IG_VC_2175	1	39	0.026	329	8.4
IG_VC_A0554	1	12	0.083	329	27.4
IG_VC_2334	1	11	0.091	327	29.7
VC_2223	1	49	0.02	315	6.4
VC_1415	1	19	0.053	314	16.5
VC_A0676	1	12	0.083	300	25
VC_A0007	1	37	0.027	294	7.9
IG_VC_0538	2	30	0.067	291	9.7
IG_VC_A0814	1	10	0.1	289	28.9
VC_1302	1	30	0.033	271	9
IG_VC_2134	1	2	0.5	269	134.5
IG_VC_A0086	1	6	0.167	258	43
VC_0812	1	157	0.006	256	1.6
IG_VC_2184	1	8	0.125	251	31.4
VC_0965	6	78	0.077	231	3
VC_A0197	1	48	0.021	229	4.8
VC_A0199	1	163	0.006	229	1.4
IG_VC_0303	1	2	0.5	222	111
VC_1893	1	37	0.027	210	5.7
VC_0402	1	82	0.012	203	2.5
VC_2286	1	40	0.025	195	4.9
VC_2349	1	52	0.019	191	3.7
IG_VC_A0546	1	33	0.03	182	5.5
IG_VC_2286	1	5	0.2	172	34.4
VC_1088	1	82	0.012	170	2.1
IG_VC_2027	1	9	0.111	154	17.1
IG_VC_1034	1	31	0.032	153	4.9
VC_1649	2	119	0.017	148	1.2
IG_VC_2370	1	5	0.2	144	28.8
IG_VC_1795	1	3	0.333	127	42.3
VC_2072	11	133	0.083	126	0.9
IG_VC_2200	1	1	1	121	121
IG_VC_2702	1	10	0.1	121	12.1
VC_2535	11	59	0.186	121	2.1
VC_A0580	1	32	0.031	118	3.7
VC_1071	1	46	0.022	109	2.4
VC_0901	1	131	0.008	105	0.8
IG_VC_2212	1	26	0.038	100	3.8
VC_1854	1	85	0.012	94	1.1
IG_VC_2600	1	14	0.071	91	6.5
VC_2209	5	271	0.018	89	0.3
VC_0409	1	41	0.024	87	2.1
VC_1901	1	79	0.013	83	1.1
VC_1684	2	27	0.074	81	3
IG_VC_2752	17	647	0.026	80	0.1
VC_0777	1	45	0.022	73	1.6
VC_2012	1	87	0.011	66	0.8
VC_A0830	2	41	0.049	65	1.6
VC_0422	7	57	0.123	64	1.1
VC_0201	1	22	0.045	63	2.9
VC_1619.1.1	5	110	0.045	60	0.5
IG_VC_1721	1	26	0.038	58	2.2
VC_2744	7	71	0.099	57	0.8
VC_0704	1	60	0.017	56	0.9
IG_VC_2291	1	4	0.25	53	13.2
VC_1184	1	47	0.021	53	1.1
VC_0298	1	88	0.011	50	0.6
VC_0607	2	46	0.043	49	1.1
VC_1516	2	83	0.024	49	0.6
VC_2352	3	56	0.054	48	0.9
VC_0036	3	61	0.049	44	0.7
VC_0831	1	134	0.007	43	0.3
VC_0723	3	96	0.031	42	0.4
VC_1307	2	42	0.048	42	1
VC_2726	5	42	0.119	42	1
VC_1426	2	39	0.051	41	1.1
VC_2127	2	18	0.111	39	2.2
VC_0046	3	22	0.136	37	1.7
VC_0535	6	100	0.06	37	0.4
VC_1009	1	24	0.042	37	1.5
VC_2063	4	112	0.036	36	0.3
IG_VC_2138	2	15	0.133	35	2.3
VC_0618	2	41	0.049	34	0.8
VC_1195	1	39	0.026	34	0.9
VC_0662	1	56	0.018	33	0.6
VC_2376	1	145	0.007	33	0.2
VC_0374	6	65	0.092	32	0.5
VC_0394	3	117	0.026	32	0.3
VC_0629	1	135	0.007	32	0.2
IG_VC_0161	8	300	0.027	31	0.1
IG_VC_0714	8	307	0.026	31	0.1
IG_VC_2045	1	19	0.053	31	1.6
VC_A0221	1	40	0.025	31	0.8
VC_0234	3	60	0.05	30	0.5
VC_0604	6	110	0.055	29	0.3
VC_0726	1	42	0.024	29	0.7
VC_2701	5	68	0.074	29	0.4
IG_VC_2495	8	305	0.026	28	0.1
VC_0909	1	39	0.026	28	0.7
VC_1800	2	42	0.048	28	0.7
VC_2290	8	63	0.127	28	0.4
VC_A0997	1	26	0.038	28	1.1
IG_VC_2473	1	39	0.026	27	0.7
VC_0137	1	50	0.02	27	0.5
VC_0200	2	101	0.02	27	0.3
VC_1093	1	42	0.024	27	0.6
VC_1740	3	97	0.031	27	0.3
VC_2062	5	53	0.094	27	0.5
VC_2371	1	47	0.021	27	0.6
IG_VC_0060	7	315	0.022	26	0.1
IG_VC_0315	7	305	0.023	26	0.1
IG_VC_0389	7	329	0.021	26	0.1
VC_0345	5	89	0.056	25	0.3
VC_0793	2	59	0.034	25	0.4
VC_0985	1	88	0.011	25	0.3
VC_2008	1	51	0.02	25	0.5
VC_2628	1	43	0.023	25	0.6
IG_VC_2378	1	11	0.091	24	2.2
VC_0132	1	63	0.016	24	0.4
VC_0935	7	63	0.111	24	0.4
VC_1023	1	26	0.038	24	0.9
VC_1619.1	2	254	0.008	24	0.1
VC_1722	2	32	0.062	24	0.8
VC_2092	4	65	0.062	24	0.4
VC_2567	1	19	0.053	24	1.3
VC_A0108	1	52	0.019	24	0.5
VC_0283	2	25	0.08	23	0.9
VC_0475	2	100	0.02	23	0.2
VC_0922	9	92	0.098	23	0.2
VC_1067	13	127	0.102	23	0.2
VC_A0214	2	67	0.03	23	0.3
VC_0665	6	58	0.103	22	0.4
VC_2716	4	71	0.056	22	0.3
VC_A0981	1	37	0.027	22	0.6
VC_0510	2	27	0.074	21	0.8
VC_0650	1	72	0.014	21	0.3
VC_1092	1	60	0.017	21	0.3
VC_1219	1	40	0.025	21	0.5
VC_A1057	1	24	0.042	21	0.9
VC_0130	1	87	0.011	20	0.2
VC_0304	9	68	0.132	20	0.3
VC_0337	2	41	0.049	20	0.5
VC_0917	7	51	0.137	20	0.4
VC_2749	4	57	0.07	20	0.4
VC_A0040	4	47	0.085	20	0.4
IG_VC_1887	1	11	0.091	19	1.7
VC_0047	1	44	0.023	19	0.4
VC_0271	2	47	0.043	19	0.4
VC_1119	1	29	0.034	19	0.7
IG_VC_2436	1	21	0.048	18	0.9
VC_0162	1	71	0.014	18	0.3
VC_1361	1	69	0.014	18	0.3
VC_2153	3	34	0.088	18	0.5
VC_2420	1	26	0.038	18	0.7
VC_2436	4	60	0.067	18	0.3
VC_2671	1	62	0.016	18	0.3
VC_A0005	1	16	0.062	18	1.1
VC_0196	2	62	0.032	17	0.3
VC_0544	1	22	0.045	17	0.8
VC_0937	9	109	0.083	17	0.2
VC_1847	2	28	0.071	17	0.6
VC_1863	1	44	0.023	17	0.4
VC_2618	1	44	0.023	17	0.4
VC_2619	1	26	0.038	17	0.7
VC_2738	2	75	0.027	17	0.2
VC_A0120	2	147	0.014	17	0.1
VC_A0717	1	84	0.012	17	0.2
VC_A0758	1	32	0.031	17	0.5
VC_A0851	1	57	0.018	17	0.3
VC_0022	2	34	0.059	16	0.5
VC_0068	1	53	0.019	16	0.3
VC_0251	7	162	0.043	16	0.1
VC_0305	10	53	0.189	16	0.3
VC_0496	1	42	0.024	16	0.4
VC_1108	2	60	0.033	16	0.3
VC_1198	3	153	0.02	16	0.1
VC_1279	2	78	0.026	16	0.2
VC_2481	1	58	0.017	16	0.3
IG_VC_2150	1	15	0.067	15	1
VC_0027	1	54	0.019	15	0.3
VC_0311	2	15	0.133	15	1
VC_0460	2	24	0.083	15	0.6
VC_0717	1	63	0.016	15	0.2
VC_0918	6	56	0.107	15	0.3
VC_1262	1	6	0.167	15	2.5
VC_2672	1	20	0.05	15	0.8
VC_A0095	1	28	0.036	15	0.5
VC_A0262	2	20	0.1	15	0.8
IG_VC_2482	1	16	0.062	14	0.9
VC_0069	1	65	0.015	14	0.2
VC_0920	5	61	0.082	14	0.2
VC_0924	3	70	0.043	14	0.2
VC_1406	1	51	0.02	14	0.3
VC_1500	1	60	0.017	14	0.2
VC_1577	1	45	0.022	14	0.3
VC_1681	2	52	0.038	14	0.3
VC_2414	4	108	0.037	14	0.1
VC_2451	2	82	0.024	14	0.2
VC_2534	3	43	0.07	14	0.3
VC_A0115	1	30	0.033	14	0.5
VC_A0157	1	122	0.008	14	0.1
VC_A0223	1	114	0.009	14	0.1
IG_VC_1315	1	1	1	13	13
IG_VC_2079	1	54	0.019	13	0.2
IG_VC_2280	1	11	0.091	13	1.2
IG_VC_2614	1	20	0.05	13	0.7
VC_0097	1	23	0.043	13	0.6
VC_0203	2	62	0.032	13	0.2
VC_0306	1	17	0.059	13	0.8
VC_0354	1	29	0.034	13	0.4
VC_0533	1	64	0.016	13	0.2
VC_0658	1	92	0.011	13	0.1
VC_0761	6	24	0.25	13	0.5
VC_0925	4	52	0.077	13	0.2
VC_1177	1	40	0.025	13	0.3
VC_1920	5	93	0.054	13	0.1
VC_2084	1	38	0.026	13	0.3
VC_2262	10	111	0.09	13	0.1
VC_2442	3	59	0.051	13	0.2
VC_2488	1	33	0.03	13	0.4
VC_2659	1	15	0.067	13	0.9
VC_2724	2	17	0.118	13	0.8
VC_A0057	1	54	0.019	13	0.2
VC_A0109	1	18	0.056	13	0.7
VC_A0248	1	44	0.023	13	0.3
VC_A0358	1	18	0.056	13	0.7
VC_A0414	1	17	0.059	13	0.8
VC_A0425	1	18	0.056	13	0.7
VC_A0449	1	18	0.056	13	0.7
VC_A1105	1	34	0.029	13	0.4
IG_VC_2276	1	8	0.125	12	1.5
VC_0190	2	72	0.028	12	0.2
VC_0264	1	41	0.024	12	0.3
VC_0288	1	60	0.017	12	0.2
VC_0377	3	14	0.214	12	0.9
VC_0411	1	34	0.029	12	0.4
VC_0856	1	33	0.03	12	0.4
VC_0941	1	54	0.019	12	0.2
VC_1237	1	33	0.03	12	0.4
VC_1437	7	119	0.059	12	0.1
VC_1897	1	11	0.091	12	1.1
VC_2051	3	28	0.107	12	0.4
VC_2081	5	48	0.104	12	0.2
VC_2087	3	113	0.027	12	0.1
VC_2373	2	171	0.012	12	0.1
VC_2422	1	33	0.03	12	0.4
VC_2441	1	27	0.037	12	0.4
VC_A0097	1	28	0.036	12	0.4
VC_A0182	1	65	0.015	12	0.2
VC_A0898	1	51	0.02	12	0.2
VC_A1049	1	41	0.024	12	0.3
IG_VC_0193	1	4	0.25	11	2.8
IG_VC_2622	2	15	0.133	11	0.7
IG_VC_A0507	2	31	0.065	11	0.4
VC_0028	2	60	0.033	11	0.2
VC_0241	7	107	0.065	11	0.1
VC_0321	9	79	0.114	11	0.1
VC_0673	1	42	0.024	11	0.3
VC_0735	1	6	0.167	11	1.8
VC_1111	1	50	0.02	11	0.2
VC_1704	1	90	0.011	11	0.1
VC_1804	1	15	0.067	11	0.7
VC_1868	1	87	0.011	11	0.1
VC_2089	4	80	0.05	11	0.1
VC_2097	1	34	0.029	11	0.3
VC_2279	2	67	0.03	11	0.2
VC_2698	1	62	0.016	11	0.2
VC_A0027	2	111	0.018	11	0.1
VC_A0061	1	60	0.017	11	0.2
VC_A0191	1	69	0.014	11	0.2
IG_VC_0032	2	36	0.056	10	0.3
IG_VC_2042	1	34	0.029	10	0.3
IG_VC_2479	1	12	0.083	10	0.8
IG_VC_A0741	1	22	0.045	10	0.5
IG_VC_A1044	1	29	0.034	10	0.3
VC_0008	1	25	0.04	10	0.4
VC_0056	1	43	0.023	10	0.2
VC_0224	3	34	0.088	10	0.3
VC_0376	1	53	0.019	10	0.2
VC_0495	1	40	0.025	10	0.2
VC_0522	1	30	0.033	10	0.3
VC_0934	5	79	0.063	10	0.1
VC_1056	1	23	0.043	10	0.4
VC_2082	4	36	0.111	10	0.3
VC_2091	1	13	0.077	10	0.8
VC_2293	4	30	0.133	10	0.3
VC_2415	1	29	0.034	10	0.3
VC_2563	1	24	0.042	10	0.4
VC_2677	3	30	0.1	10	0.3
VC_2705	2	82	0.024	10	0.1
VC_A0030	1	41	0.024	10	0.2
VC_A0074	5	51	0.098	10	0.2
VC_A0088	1	47	0.021	10	0.2
IG_VC_1933	2	10	0.2	9	0.9
IG_VC_2512	1	7	0.143	9	1.3
IG_VC_A0002	2	54	0.037	9	0.2
VC_0299	1	26	0.038	9	0.3
VC_0373	1	23	0.043	9	0.4
VC_0430	7	49	0.143	9	0.2
VC_0676	1	58	0.017	9	0.2
VC_0847	1	59	0.017	9	0.2
VC_0927	3	33	0.091	9	0.3
VC_1571	1	58	0.017	9	0.2
VC_1732	1	50	0.02	9	0.2
VC_1946	1	3	0.333	9	3
VC_2275	1	20	0.05	9	0.5
VC_2299	1	23	0.043	9	0.4
VC_2446	1	39	0.026	9	0.2
VC_2469	1	70	0.014	9	0.1
VC_2484	3	78	0.038	9	0.1
VC_2529	4	61	0.066	9	0.1
VC_2700	2	149	0.013	9	0.1
VC_2733	1	71	0.014	9	0.1
VC_A0039	4	18	0.222	9	0.5
VC_A0235	1	42	0.024	9	0.2
VC_A0703	1	33	0.03	9	0.3
VC_A0983	1	57	0.018	9	0.2
VC_A1095	2	79	0.025	9	0.1
IG_VC_0712	1	16	0.062	8	0.5
IG_VC_2092	1	34	0.029	8	0.2
IG_VC_2242	1	6	0.167	8	1.3
IG_VC_2497	1	12	0.083	8	0.7
VC_0165	1	55	0.018	8	0.1
VC_0242	5	109	0.046	8	0.1
VC_0270	1	66	0.015	8	0.1
VC_0396	1	34	0.029	8	0.2
VC_0563	1	25	0.04	8	0.3
VC_0587	1	73	0.014	8	0.1
VC_0738	1	5	0.2	8	1.6
VC_0758	2	44	0.045	8	0.2
VC_1083	1	24	0.042	8	0.3
VC_1141	2	96	0.021	8	0.1
VC_1418	1	161	0.006	8	0
VC_1660	1	93	0.011	8	0.1
VC_1952	1	115	0.009	8	0.1
VC_1991	1	20	0.05	8	0.4
VC_2211	1	105	0.01	8	0.1
VC_2291	4	38	0.105	8	0.2
VC_2382	1	30	0.033	8	0.3
VC_2449	1	4	0.25	8	2
VC_2465	4	32	0.125	8	0.2
VC_2549	1	21	0.048	8	0.4
VC_A0160	2	68	0.029	8	0.1
VC_A0217	2	51	0.039	8	0.2
VC_A0246	1	59	0.017	8	0.1
VC_A0396	1	59	0.017	8	0.1
VC_A0593	1	40	0.025	8	0.2
VC_A0704	1	47	0.021	8	0.2
VC_A1036	1	45	0.022	8	0.2
IG_VC_0160	2	26	0.077	7	0.3
IG_VC_0314	2	4	0.5	7	1.8
IG_VC_0388	2	4	0.5	7	1.8
IG_VC_0855	1	15	0.067	7	0.5
IG_VC_2186	3	121	0.025	7	0.1
IG_VC_A0449	1	5	0.2	7	1.4
IG_VC_A1104	1	2	0.5	7	3.5
VC_0059	2	7	0.286	7	1
VC_0093	1	87	0.011	7	0.1
VC_0094	2	47	0.043	7	0.1
VC_0175	1	108	0.009	7	0.1
VC_0191	1	33	0.03	7	0.2
VC_0256	1	20	0.05	7	0.3
VC_0362	7	77	0.091	7	0.1
VC_0406	1	54	0.019	7	0.1
VC_0468	3	43	0.07	7	0.2
VC_0556	3	65	0.046	7	0.1
VC_0566	1	55	0.018	7	0.1
VC_0603	1	100	0.01	7	0.1
VC_0616	1	37	0.027	7	0.2
VC_0622	1	171	0.006	7	0
VC_0945	1	16	0.062	7	0.4
VC_1167	2	28	0.071	7	0.2
VC_1179	1	45	0.022	7	0.2
VC_1200	1	73	0.014	7	0.1
VC_1280	1	84	0.012	7	0.1
VC_1398	1	22	0.045	7	0.3
VC_1477	1	21	0.048	7	0.3
VC_1519	1	33	0.03	7	0.2
VC_1790	1	20	0.05	7	0.3
VC_2052	2	89	0.022	7	0.1
VC_2202	1	51	0.02	7	0.1
VC_2294	2	60	0.033	7	0.1
VC_2334	1	34	0.029	7	0.2
VC_2438	1	102	0.01	7	0.1
VC_2496	2	6	0.333	7	1.2
VC_2629	4	34	0.118	7	0.2
VC_2673	1	40	0.025	7	0.2
VC_2753	2	7	0.286	7	1
VC_A0028	1	11	0.091	7	0.6
VC_A0123	1	161	0.006	7	0
VC_A0372	1	20	0.05	7	0.3
VC_A0507	1	20	0.05	7	0.3
VC_A0792	1	20	0.05	7	0.3
VC_A1102	1	84	0.012	7	0.1
IG_VC_0306	1	11	0.091	6	0.5
IG_VC_0738	1	6	0.167	6	1
IG_VC_1900	1	14	0.071	6	0.4
IG_VC_A0574	2	16	0.125	6	0.4
IG_VC_A0692	1	82	0.012	6	0.1
IG_VC_A0767	2	5	0.4	6	1.2
VC_0070	1	13	0.077	6	0.5
VC_0173	1	39	0.026	6	0.2
VC_0599	1	4	0.25	6	1.5
VC_0799	2	46	0.043	6	0.1
VC_1287	1	94	0.011	6	0.1
VC_1345	1	37	0.027	6	0.2
VC_1347	1	33	0.03	6	0.2
VC_1496	1	112	0.009	6	0.1
VC_1665	1	72	0.014	6	0.1
VC_1869	1	28	0.036	6	0.2
VC_1886	1	135	0.007	6	0
VC_2088	2	37	0.054	6	0.2
VC_2164	4	67	0.06	6	0.1
VC_2423	1	36	0.028	6	0.2
VC_2693	2	55	0.036	6	0.1
VC_A0011	1	104	0.01	6	0.1
VC_A0218	1	68	0.015	6	0.1
VC_A0268	1	80	0.013	6	0.1
VC_A0534	1	44	0.023	6	0.1
VC_A0563	1	83	0.012	6	0.1
VC_A0781	1	92	0.011	6	0.1
VC_A0911	1	28	0.036	6	0.2
IG_VC_0430	1	13	0.077	5	0.4
IG_VC_1786	1	12	0.083	5	0.4
IG_VC_2472	1	7	0.143	5	0.7
IG_VC_A0212	1	18	0.056	5	0.3
VC_0004	1	68	0.015	5	0.1
VC_0108	1	121	0.008	5	0
VC_0135	2	55	0.036	5	0.1
VC_0239	4	94	0.043	5	0.1
VC_0244	3	86	0.035	5	0.1
VC_0249	3	128	0.023	5	0
VC_0259	3	103	0.029	5	0
VC_0260	5	114	0.044	5	0
VC_0302	1	45	0.022	5	0.1
VC_0328	1	188	0.005	5	0
VC_0429	1	108	0.009	5	0
VC_0632	1	87	0.011	5	0.1
VC_0818	1	45	0.022	5	0.1
VC_1059	1	36	0.028	5	0.1
VC_1354	1	65	0.015	5	0.1
VC_1442	3	85	0.035	5	0.1
VC_1541	1	53	0.019	5	0.1
VC_1544	1	28	0.036	5	0.2
VC_1798	1	63	0.016	5	0.1
VC_1831	1	123	0.008	5	0
VC_1902	1	26	0.038	5	0.2
VC_1990	1	69	0.014	5	0.1
VC_2094	1	35	0.029	5	0.1
VC_2285	1	72	0.014	5	0.1
VC_2303	1	26	0.038	5	0.2
VC_2437	2	55	0.036	5	0.1
VC_2498	1	22	0.045	5	0.2
VC_2559	1	58	0.017	5	0.1
VC_2662	1	20	0.05	5	0.2
VC_A0025	1	58	0.017	5	0.1
VC_A0232	1	98	0.01	5	0.1
VC_A0276	2	86	0.023	5	0.1
VC_A0744	1	62	0.016	5	0.1
VC_A0767	4	33	0.121	5	0.2
IG_VC_0739	1	5	0.2	4	0.8
IG_VC_2070	2	20	0.1	4	0.2
IG_VC_A0869	1	30	0.033	4	0.1
IG_VC_A0940	1	9	0.111	4	0.4
IG_VC_A0997	1	7	0.143	4	0.6
VC_0136	1	37	0.027	4	0.1
VC_0166	3	29	0.103	4	0.1
VC_0266	1	21	0.048	4	0.2
VC_0343	1	31	0.032	4	0.1
VC_0361	1	89	0.011	4	0
VC_0399	1	62	0.016	4	0.1
VC_0574	1	76	0.013	4	0.1
VC_0936	3	22	0.136	4	0.2
VC_0984	1	40	0.025	4	0.1
VC_1047	1	79	0.013	4	0.1
VC_1097	3	87	0.034	4	0
VC_1123	1	25	0.04	4	0.2
VC_1441	1	29	0.034	4	0.1
VC_1730	2	99	0.02	4	0
VC_1806	1	60	0.017	4	0.1
VC_1898	1	58	0.017	4	0.1
VC_1900	1	43	0.023	4	0.1
VC_1903	3	119	0.025	4	0
VC_1950	1	91	0.011	4	0
VC_2029	1	11	0.091	4	0.4
VC_2061	3	47	0.064	4	0.1
VC_2073	1	16	0.062	4	0.2
VC_2210	2	44	0.045	4	0.1
VC_2295	1	56	0.018	4	0.1
VC_2309	2	42	0.048	4	0.1
VC_2311	2	25	0.08	4	0.2
VC_2413	4	60	0.067	4	0.1
VC_2453	2	113	0.018	4	0
VC_2550	1	18	0.056	4	0.2
VC_2555	1	25	0.04	4	0.2
VC_2670	1	25	0.04	4	0.2
VC_2736	3	34	0.088	4	0.1
VC_A0242	1	21	0.048	4	0.2
VC_A0316	1	34	0.029	4	0.1
VC_A0417	1	34	0.029	4	0.1
VC_A0666	1	50	0.02	4	0.1
VC_A0708	1	45	0.022	4	0.1
VC_A0760	1	26	0.038	4	0.2
VC_A1023	1	101	0.01	4	0
VC_A1034	1	77	0.013	4	0.1
IG_VC_0241	1	42	0.024	3	0.1
IG_VC_0603	1	11	0.091	3	0.3
IG_VC_0901	2	7	0.286	3	0.4
IG_VC_1572	1	36	0.028	3	0.1
IG_VC_2501	1	16	0.062	3	0.2
IG_VC_A0238	1	17	0.059	3	0.2
VC_0061	1	105	0.01	3	0
VC_0170	1	61	0.016	3	0
VC_0225	1	42	0.024	3	0.1
VC_0243	3	97	0.031	3	0
VC_0312	2	36	0.056	3	0.1
VC_0342	1	41	0.024	3	0.1
VC_0349	1	51	0.02	3	0.1
VC_0355	3	33	0.091	3	0.1
VC_0416	1	48	0.021	3	0.1
VC_0421	1	34	0.029	3	0.1
VC_0462	1	38	0.026	3	0.1
VC_0490	1	170	0.006	3	0
VC_0568	1	69	0.014	3	0
VC_0576	1	31	0.032	3	0.1
VC_0602	1	90	0.011	3	0
VC_0659	1	62	0.016	3	0
VC_0660	1	38	0.026	3	0.1
VC_0694	1	60	0.017	3	0.1
VC_0748	1	49	0.02	3	0.1
VC_0815	1	91	0.011	3	0
VC_0919	3	38	0.079	3	0.1
VC_1036	2	80	0.025	3	0
VC_1190	1	55	0.018	3	0.1
VC_1320	1	33	0.03	3	0.1
VC_1321	1	173	0.006	3	0
VC_1629	2	120	0.017	3	0
VC_1768	2	86	0.023	3	0
VC_1967	1	119	0.008	3	0
VC_2011	1	35	0.029	3	0.1
VC_2053	2	23	0.087	3	0.1
VC_2086	1	51	0.02	3	0.1
VC_2090	1	23	0.043	3	0.1
VC_2215	1	102	0.01	3	0
VC_2384	1	33	0.03	3	0.1
VC_2416	1	92	0.011	3	0
VC_2473	1	17	0.059	3	0.2
VC_2538	1	60	0.017	3	0.1
VC_2544	2	38	0.053	3	0.1
VC_2557	1	25	0.04	3	0.1
VC_2565	2	22	0.091	3	0.1
VC_2601	1	39	0.026	3	0.1
VC_2617	1	43	0.023	3	0.1
VC_2709	1	7	0.143	3	0.4
VC_A0141	1	66	0.015	3	0
VC_A0171	1	62	0.016	3	0
VC_A0618	1	25	0.04	3	0.1
VC_A0745	1	41	0.024	3	0.1
VC_A0774	2	60	0.033	3	0.1
VC_A0919	1	15	0.067	3	0.2
VC_A0972	1	65	0.015	3	0
VC_A1019	1	23	0.043	3	0.1
IG_VC_0099	1	16	0.062	2	0.1
IG_VC_0218	1	16	0.062	2	0.1
IG_VC_0273	1	15	0.067	2	0.1
IG_VC_0313	1	15	0.067	2	0.1
IG_VC_0321	1	34	0.029	2	0.1
IG_VC_0347	1	13	0.077	2	0.2
IG_VC_1068	1	31	0.032	2	0.1
IG_VC_1096	1	6	0.167	2	0.3
IG_VC_1722	2	26	0.077	2	0.1
IG_VC_1738	1	20	0.05	2	0.1
IG_VC_2692	1	13	0.077	2	0.2
IG_VC_A0107	1	39	0.026	2	0.1
IG_VC_A0844	1	4	0.25	2	0.5
IG_VC_A0999	1	5	0.2	2	0.4
VC_0010	1	36	0.028	2	0.1
VC_0058	1	30	0.033	2	0.1
VC_0062	1	75	0.013	2	0
VC_0144	1	32	0.031	2	0.1
VC_0194	1	46	0.022	2	0
VC_0204	1	19	0.053	2	0.1
VC_0226	1	6	0.167	2	0.3
VC_0257	1	59	0.017	2	0
VC_0378	2	23	0.087	2	0.1
VC_0386	1	44	0.023	2	0
VC_0395	1	43	0.023	2	0
VC_0434	1	51	0.02	2	0
VC_0512	1	108	0.009	2	0
VC_0514	1	176	0.006	2	0
VC_0525	2	18	0.111	2	0.1
VC_0550	1	70	0.014	2	0
VC_0594	2	49	0.041	2	0
VC_0624	1	49	0.02	2	0
VC_0654	1	23	0.043	2	0.1
VC_0721	1	36	0.028	2	0.1
VC_1033	1	83	0.012	2	0
VC_1104	1	85	0.012	2	0
VC_1127	1	25	0.04	2	0.1
VC_1210	1	34	0.029	2	0.1
VC_1246	1	34	0.029	2	0.1
VC_1276	1	49	0.02	2	0
VC_1308	1	49	0.02	2	0
VC_1435	2	36	0.056	2	0.1
VC_1439	1	51	0.02	2	0
VC_1478	1	59	0.017	2	0
VC_1592	1	47	0.021	2	0
VC_1789	1	59	0.017	2	0
VC_1872	1	83	0.012	2	0
VC_1880	2	24	0.083	2	0.1
VC_2023	1	44	0.023	2	0
VC_2030	1	121	0.008	2	0
VC_2064	1	24	0.042	2	0.1
VC_2083	2	34	0.059	2	0.1
VC_2273	2	47	0.043	2	0
VC_2386	1	155	0.006	2	0
VC_2400	1	59	0.017	2	0
VC_2404	1	55	0.018	2	0
VC_2418	1	36	0.028	2	0.1
VC_2483	1	80	0.013	2	0
VC_2520	1	33	0.03	2	0.1
VC_2584	1	31	0.032	2	0.1
VC_2710	2	83	0.024	2	0
VC_2712	1	60	0.017	2	0
VC_2742	1	45	0.022	2	0
VC_2745	1	14	0.071	2	0.1
VC_A0038	1	34	0.029	2	0.1
VC_A0243	1	28	0.036	2	0.1
VC_A0323	1	21	0.048	2	0.1
VC_A0371	1	59	0.017	2	0
VC_A0421	1	27	0.037	2	0.1
VC_A0508	1	59	0.017	2	0
VC_A0560	1	73	0.014	2	0
VC_A0765	2	40	0.05	2	0.1
VC_A0790	1	102	0.01	2	0
VC_A0791	1	59	0.017	2	0
VC_A0852	1	56	0.018	2	0
VC_A0883	1	58	0.017	2	0
VC_A0887	1	45	0.022	2	0
VC_A0894	2	26	0.077	2	0.1
VC_A0895	1	138	0.007	2	0
VC_A0906	1	87	0.011	2	0
VC_A1015	1	60	0.017	2	0
VC_A1058	1	39	0.026	2	0.1
VC_A1113	1	58	0.017	2	0
IG_VC_0040	1	5	0.2	1	0.2
IG_VC_0163	1	10	0.1	1	0.1
IG_VC_0176	1	44	0.023	1	0
IG_VC_0253	1	11	0.091	1	0.1
IG_VC_0341	1	15	0.067	1	0.1
IG_VC_0443	1	5	0.2	1	0.2
IG_VC_0512	1	77	0.013	1	0
IG_VC_0595	1	6	0.167	1	0.2
IG_VC_0597	1	10	0.1	1	0.1
IG_VC_0681	1	6	0.167	1	0.2
IG_VC_0709	1	12	0.083	1	0.1
IG_VC_0828	1	40	0.025	1	0
IG_VC_0870	1	10	0.1	1	0.1
IG_VC_0876	1	14	0.071	1	0.1
IG_VC_0955	1	2	0.5	1	0.5
IG_VC_0972	1	48	0.021	1	0
IG_VC_1644	1	17	0.059	1	0.1
IG_VC_2020	1	3	0.333	1	0.3
IG_VC_2056	1	9	0.111	1	0.1
IG_VC_2058	1	33	0.03	1	0
IG_VC_2106	1	24	0.042	1	0
IG_VC_2296	1	27	0.037	1	0
IG_VC_2352	1	22	0.045	1	0
IG_VC_2416	1	40	0.025	1	0
IG_VC_2422	1	20	0.05	1	0.1
IG_VC_2503	1	10	0.1	1	0.1
IG_VC_2637	1	12	0.083	1	0.1
IG_VC_2642	1	13	0.077	1	0.1
IG_VC_2679	1	13	0.077	1	0.1
IG_VC_2720	1	7	0.143	1	0.1
IG_VC_A0004	1	22	0.045	1	0
IG_VC_A0037	1	25	0.04	1	0
IG_VC_A0276	1	9	0.111	1	0.1
IG_VC_A0350	1	7	0.143	1	0.1
IG_VC_A0422	1	13	0.077	1	0.1
IG_VC_A0457	1	21	0.048	1	0
IG_VC_A0493	1	5	0.2	1	0.2
IG_VC_A0732	1	11	0.091	1	0.1
IG_VC_A0884	1	4	0.25	1	0.2
IG_VC_A0907	1	26	0.038	1	0
IG_VC_A1057	1	30	0.033	1	0
VC_0023	1	15	0.067	1	0.1
VC_0026	1	39	0.026	1	0
VC_0034	1	28	0.036	1	0
VC_0048	1	52	0.019	1	0
VC_0128	1	38	0.026	1	0
VC_0172	1	45	0.022	1	0
VC_0176	1	18	0.056	1	0.1
VC_0245	1	113	0.009	1	0
VC_0252	1	43	0.023	1	0
VC_0275	1	35	0.029	1	0
VC_0284	1	88	0.011	1	0
VC_0290	1	18	0.056	1	0.1
VC_0291	1	35	0.029	1	0
VC_0346	1	38	0.026	1	0
VC_0347	1	12	0.083	1	0.1
VC_0353	1	39	0.026	1	0
VC_0371	1	53	0.019	1	0
VC_0384	1	79	0.013	1	0
VC_0398	1	98	0.01	1	0
VC_0413	1	22	0.045	1	0
VC_0419	1	55	0.018	1	0
VC_0428	1	20	0.05	1	0.1
VC_0454	1	34	0.029	1	0
VC_0471	1	20	0.05	1	0.1
VC_0488	1	48	0.021	1	0
VC_0531	1	34	0.029	1	0
VC_0585	1	27	0.037	1	0
VC_0601	1	66	0.015	1	0
VC_0651	1	44	0.023	1	0
VC_0691	1	41	0.024	1	0
VC_0709	1	35	0.029	1	0
VC_0737	1	12	0.083	1	0.1
VC_0760	1	59	0.017	1	0
VC_0771	1	40	0.025	1	0
VC_0851	1	24	0.042	1	0
VC_0855	1	75	0.013	1	0
VC_0874	1	10	0.1	1	0.1
VC_0912	1	3	0.333	1	0.3
VC_0966	1	11	0.091	1	0.1
VC_1018	1	91	0.011	1	0
VC_1021	1	48	0.021	1	0
VC_1040	1	18	0.056	1	0.1
VC_1043	1	86	0.012	1	0
VC_1086	1	81	0.012	1	0
VC_1098	1	40	0.025	1	0
VC_1122	1	70	0.014	1	0
VC_1152	1	47	0.021	1	0
VC_1188	1	80	0.013	1	0
VC_1291	1	82	0.012	1	0
VC_1297	1	57	0.018	1	0
VC_1329	1	48	0.021	1	0
VC_1416	1	158	0.006	1	0
VC_1468	1	15	0.067	1	0.1
VC_1470	1	35	0.029	1	0
VC_1474	1	15	0.067	1	0.1
VC_1476	1	35	0.029	1	0
VC_1535	1	61	0.016	1	0
VC_1549	1	65	0.015	1	0
VC_1608	1	50	0.02	1	0
VC_1618	1	56	0.018	1	0
VC_1622	1	35	0.029	1	0
VC_1628	1	56	0.018	1	0
VC_1651	1	90	0.011	1	0
VC_1761	1	40	0.025	1	0
VC_1791	1	59	0.017	1	0
VC_1833	1	50	0.02	1	0
VC_1842	1	7	0.143	1	0.1
VC_1867	1	59	0.017	1	0
VC_1874	1	71	0.014	1	0
VC_1888	1	100	0.01	1	0
VC_1918	1	83	0.012	1	0
VC_1938	1	26	0.038	1	0
VC_1942	1	42	0.024	1	0
VC_1965	1	33	0.03	1	0
VC_1979	1	44	0.023	1	0
VC_1994	1	80	0.013	1	0
VC_2007	1	61	0.016	1	0
VC_2017	1	47	0.021	1	0
VC_2055	1	34	0.029	1	0
VC_2057	1	24	0.042	1	0
VC_2170	1	4	0.25	1	0.2
VC_2230	1	23	0.043	1	0
VC_2236	1	29	0.034	1	0
VC_2260	1	42	0.024	1	0
VC_2278	1	53	0.019	1	0
VC_2292	1	37	0.027	1	0
VC_2336	1	15	0.067	1	0.1
VC_2364	1	89	0.011	1	0
VC_2394	1	110	0.009	1	0
VC_2402	1	52	0.019	1	0
VC_2440	1	63	0.016	1	0
VC_2466	1	19	0.053	1	0.1
VC_2485	1	29	0.034	1	0
VC_2497	1	74	0.014	1	0
VC_2515	1	12	0.083	1	0.1
VC_2518	1	16	0.062	1	0.1
VC_2573	1	21	0.048	1	0
VC_2574	1	27	0.037	1	0
VC_2614	1	24	0.042	1	0
VC_2650	1	14	0.071	1	0.1
VC_2652	1	7	0.143	1	0.1
VC_2689	1	43	0.023	1	0
VC_2690	1	34	0.029	1	0
VC_2746	1	63	0.016	1	0
VC_2747	1	24	0.042	1	0
VC_2765	1	41	0.024	1	0
VC_2767	1	21	0.048	1	0
VC_A0031	1	75	0.013	1	0
VC_A0089	1	8	0.125	1	0.1
VC_A0112	1	61	0.016	1	0
VC_A0151	1	65	0.015	1	0
VC_A0165	1	101	0.01	1	0
VC_A0203	1	17	0.059	1	0.1
VC_A0317	1	28	0.036	1	0
VC_A0350	1	29	0.034	1	0
VC_A0406	1	27	0.037	1	0
VC_A0443	1	31	0.032	1	0
VC_A0491	1	38	0.026	1	0
VC_A0505	1	41	0.024	1	0
VC_A0527	1	43	0.023	1	0
VC_A0661	1	21	0.048	1	0
VC_A0691	1	38	0.026	1	0
VC_A0720	1	30	0.033	1	0
VC_A0753	1	59	0.017	1	0
VC_A0811	1	57	0.018	1	0
VC_A0873	1	71	0.014	1	0
VC_A0987	1	71	0.014	1	0
VC_A0992	1	20	0.05	1	0.1
VC_A1052	1	23	0.043	1	0
VC_A1055	1	44	0.023	1	0
IG_1	0	24	0	0	0
IG_VC_0003	0	1	0	0	0
IG_VC_0004	0	3	0	0	0
IG_VC_0007	0	1	0	0	0
IG_VC_0008	0	10	0	0	0
IG_VC_0010	0	6	0	0	0
IG_VC_0011	0	16	0	0	0
IG_VC_0012	0	3	0	0	0
IG_VC_0013	0	5	0	0	0
IG_VC_0014	0	3	0	0	0
IG_VC_0015	0	1	0	0	0
IG_VC_0016	0	19	0	0	0
IG_VC_0018	0	18	0	0	0
IG_VC_0019	0	3	0	0	0
IG_VC_0020	0	15	0	0	0
IG_VC_0022	0	14	0	0	0
IG_VC_0023	0	8	0	0	0
IG_VC_0024	0	5	0	0	0
IG_VC_0025	0	11	0	0	0
IG_VC_0026	0	8	0	0	0
IG_VC_0027	0	14	0	0	0
IG_VC_0033	0	6	0	0	0
IG_VC_0034	0	2	0	0	0
IG_VC_0035	0	1	0	0	0
IG_VC_0037	0	24	0	0	0
IG_VC_0038	0	6	0	0	0
IG_VC_0039	0	17	0	0	0
IG_VC_0041	0	2	0	0	0
IG_VC_0045	0	3	0	0	0
IG_VC_0046	0	2	0	0	0
IG_VC_0047	0	4	0	0	0
IG_VC_0049	0	1	0	0	0
IG_VC_0051	0	6	0	0	0
IG_VC_0056	0	3	0	0	0
IG_VC_0059	0	21	0	0	0
IG_VC_0061	0	20	0	0	0
IG_VC_0067	0	12	0	0	0
IG_VC_0068	0	11	0	0	0
IG_VC_0069	0	4	0	0	0
IG_VC_0070	0	8	0	0	0
IG_VC_0071	0	8	0	0	0
IG_VC_0072	0	5	0	0	0
IG_VC_0074	0	5	0	0	0
IG_VC_0075	0	2	0	0	0
IG_VC_0076	0	3	0	0	0
IG_VC_0077	0	4	0	0	0
IG_VC_0078	0	1	0	0	0
IG_VC_0079	0	1	0	0	0
IG_VC_0080	0	6	0	0	0
IG_VC_0082	0	8	0	0	0
IG_VC_0083	0	1	0	0	0
IG_VC_0084	0	1	0	0	0
IG_VC_0086	0	3	0	0	0
IG_VC_0088	0	7	0	0	0
IG_VC_0089	0	20	0	0	0
IG_VC_0090	0	7	0	0	0
IG_VC_0091	0	5	0	0	0
IG_VC_0092	0	1	0	0	0
IG_VC_0093	0	12	0	0	0
IG_VC_0094	0	2	0	0	0
IG_VC_0096	0	2	0	0	0
IG_VC_0097	0	5	0	0	0
IG_VC_0098	0	3	0	0	0
IG_VC_0100	0	1	0	0	0
IG_VC_0101	0	6	0	0	0
IG_VC_0102	0	7	0	0	0
IG_VC_0103	0	9	0	0	0
IG_VC_0104	0	2	0	0	0
IG_VC_0106	0	7	0	0	0
IG_VC_0107	0	30	0	0	0
IG_VC_0108	0	6	0	0	0
IG_VC_0110	0	17	0	0	0
IG_VC_0111	0	16	0	0	0
IG_VC_0112	0	8	0	0	0
IG_VC_0113	0	10	0	0	0
IG_VC_0116	0	3	0	0	0
IG_VC_0117	0	1	0	0	0
IG_VC_0120	0	4	0	0	0
IG_VC_0121	0	11	0	0	0
IG_VC_0123	0	6	0	0	0
IG_VC_0125	0	3	0	0	0
IG_VC_0130	0	9	0	0	0
IG_VC_0131	0	2	0	0	0
IG_VC_0134	0	3	0	0	0
IG_VC_0135	0	5	0	0	0
IG_VC_0136	0	2	0	0	0
IG_VC_0138	0	1	0	0	0
IG_VC_0139	0	4	0	0	0
IG_VC_0140	0	16	0	0	0
IG_VC_0141	0	4	0	0	0
IG_VC_0142	0	3	0	0	0
IG_VC_0143	0	42	0	0	0
IG_VC_0144	0	12	0	0	0
IG_VC_0145	0	3	0	0	0
IG_VC_0147	0	13	0	0	0
IG_VC_0150	0	6	0	0	0
IG_VC_0151	0	16	0	0	0
IG_VC_0152	0	16	0	0	0
IG_VC_0153	0	2	0	0	0
IG_VC_0154	0	1	0	0	0
IG_VC_0156	0	23	0	0	0
IG_VC_0157	0	4	0	0	0
IG_VC_0158	0	31	0	0	0
IG_VC_0162	0	11	0	0	0
IG_VC_0164	0	9	0	0	0
IG_VC_0167	0	13	0	0	0
IG_VC_0168	0	5	0	0	0
IG_VC_0169	0	88	0	0	0
IG_VC_0170	0	5	0	0	0
IG_VC_0171	0	1	0	0	0
IG_VC_0172	0	4	0	0	0
IG_VC_0174	0	11	0	0	0
IG_VC_0175	0	18	0	0	0
IG_VC_0177	0	13	0	0	0
IG_VC_0179	0	1	0	0	0
IG_VC_0182	0	3	0	0	0
IG_VC_0186	0	8	0	0	0
IG_VC_0187	0	5	0	0	0
IG_VC_0188	0	22	0	0	0
IG_VC_0189	0	2	0	0	0
IG_VC_0191	0	29	0	0	0
IG_VC_0192	0	3	0	0	0
IG_VC_0194	0	1	0	0	0
IG_VC_0195	0	12	0	0	0
IG_VC_0196	0	11	0	0	0
IG_VC_0198	0	13	0	0	0
IG_VC_0199	0	1	0	0	0
IG_VC_0200	0	7	0	0	0
IG_VC_0201	0	1	0	0	0
IG_VC_0205	0	5	0	0	0
IG_VC_0208	0	6	0	0	0
IG_VC_0209	0	6	0	0	0
IG_VC_0210	0	7	0	0	0
IG_VC_0211	0	20	0	0	0
IG_VC_0212	0	5	0	0	0
IG_VC_0215	0	6	0	0	0
IG_VC_0216	0	8	0	0	0
IG_VC_0217	0	4	0	0	0
IG_VC_0220	0	15	0	0	0
IG_VC_0222	0	5	0	0	0
IG_VC_0223	0	6	0	0	0
IG_VC_0224	0	5	0	0	0
IG_VC_0225	0	5	0	0	0
IG_VC_0228	0	1	0	0	0
IG_VC_0229	0	1	0	0	0
IG_VC_0239	0	1	0	0	0
IG_VC_0240	0	13	0	0	0
IG_VC_0244	0	1	0	0	0
IG_VC_0248	0	6	0	0	0
IG_VC_0249	0	2	0	0	0
IG_VC_0252	0	5	0	0	0
IG_VC_0254	0	18	0	0	0
IG_VC_0255	0	13	0	0	0
IG_VC_0256	0	1	0	0	0
IG_VC_0259	0	5	0	0	0
IG_VC_0261	0	8	0	0	0
IG_VC_0263	0	1	0	0	0
IG_VC_0264	0	6	0	0	0
IG_VC_0265	0	12	0	0	0
IG_VC_0266	0	5	0	0	0
IG_VC_0269	0	29	0	0	0
IG_VC_0271	0	24	0	0	0
IG_VC_0275	0	6	0	0	0
IG_VC_0276	0	3	0	0	0
IG_VC_0277	0	15	0	0	0
IG_VC_0278	0	18	0	0	0
IG_VC_0279	0	21	0	0	0
IG_VC_0280	0	10	0	0	0
IG_VC_0281	0	1	0	0	0
IG_VC_0282	0	5	0	0	0
IG_VC_0283	0	6	0	0	0
IG_VC_0285	0	14	0	0	0
IG_VC_0286	0	1	0	0	0
IG_VC_0287	0	15	0	0	0
IG_VC_0289	0	3	0	0	0
IG_VC_0290	0	12	0	0	0
IG_VC_0291	0	2	0	0	0
IG_VC_0293	0	4	0	0	0
IG_VC_0295	0	7	0	0	0
IG_VC_0298	0	21	0	0	0
IG_VC_0299	0	7	0	0	0
IG_VC_0302	0	6	0	0	0
IG_VC_0304	0	12	0	0	0
IG_VC_0307	0	19	0	0	0
IG_VC_0308	0	5	0	0	0
IG_VC_0309	0	7	0	0	0
IG_VC_0318	0	2	0	0	0
IG_VC_0320	0	2	0	0	0
IG_VC_0322	0	10	0	0	0
IG_VC_0323	0	3	0	0	0
IG_VC_0324	0	10	0	0	0
IG_VC_0325	0	1	0	0	0
IG_VC_0326	0	20	0	0	0
IG_VC_0327	0	6	0	0	0
IG_VC_0328	0	10	0	0	0
IG_VC_0329	0	6	0	0	0
IG_VC_0330	0	6	0	0	0
IG_VC_0331	0	11	0	0	0
IG_VC_0332	0	17	0	0	0
IG_VC_0333	0	1	0	0	0
IG_VC_0334	0	4	0	0	0
IG_VC_0336	0	8	0	0	0
IG_VC_0337	0	13	0	0	0
IG_VC_0338	0	2	0	0	0
IG_VC_0339	0	9	0	0	0
IG_VC_0342	0	101	0	0	0
IG_VC_0343	0	7	0	0	0
IG_VC_0348	0	2	0	0	0
IG_VC_0349	0	5	0	0	0
IG_VC_0351	0	4	0	0	0
IG_VC_0352	0	2	0	0	0
IG_VC_0354	0	8	0	0	0
IG_VC_0355	0	12	0	0	0
IG_VC_0358	0	1	0	0	0
IG_VC_0359	0	14	0	0	0
IG_VC_0360	0	8	0	0	0
IG_VC_0361	0	6	0	0	0
IG_VC_0362	0	9	0	0	0
IG_VC_0363	0	8	0	0	0
IG_VC_0364	0	6	0	0	0
IG_VC_0365	0	6	0	0	0
IG_VC_0366	0	15	0	0	0
IG_VC_0368	0	1	0	0	0
IG_VC_0369	0	3	0	0	0
IG_VC_0370	0	4	0	0	0
IG_VC_0371	0	9	0	0	0
IG_VC_0373	0	1	0	0	0
IG_VC_0374	0	20	0	0	0
IG_VC_0375	0	3	0	0	0
IG_VC_0376	0	5	0	0	0
IG_VC_0377	0	3	0	0	0
IG_VC_0379	0	25	0	0	0
IG_VC_0381	0	6	0	0	0
IG_VC_0384	0	8	0	0	0
IG_VC_0387	0	12	0	0	0
IG_VC_0390	0	10	0	0	0
IG_VC_0391	0	3	0	0	0
IG_VC_0392	0	17	0	0	0
IG_VC_0393	0	6	0	0	0
IG_VC_0394	0	3	0	0	0
IG_VC_0395	0	11	0	0	0
IG_VC_0396	0	7	0	0	0
IG_VC_0397	0	20	0	0	0
IG_VC_0398	0	11	0	0	0
IG_VC_0399	0	1	0	0	0
IG_VC_0402	0	2	0	0	0
IG_VC_0403	0	1	0	0	0
IG_VC_0406	0	1	0	0	0
IG_VC_0407	0	1	0	0	0
IG_VC_0408	0	9	0	0	0
IG_VC_0409	0	1	0	0	0
IG_VC_0410	0	5	0	0	0
IG_VC_0415	0	7	0	0	0
IG_VC_0416	0	4	0	0	0
IG_VC_0419	0	1	0	0	0
IG_VC_0420	0	1	0	0	0
IG_VC_0423	0	4	0	0	0
IG_VC_0424	0	47	0	0	0
IG_VC_0425	0	10	0	0	0
IG_VC_0426	0	1	0	0	0
IG_VC_0429	0	8	0	0	0
IG_VC_0431	0	25	0	0	0
IG_VC_0432	0	10	0	0	0
IG_VC_0433	0	32	0	0	0
IG_VC_0434	0	8	0	0	0
IG_VC_0435	0	17	0	0	0
IG_VC_0436	0	2	0	0	0
IG_VC_0437	0	15	0	0	0
IG_VC_0438	0	3	0	0	0
IG_VC_0440	0	1	0	0	0
IG_VC_0441	0	7	0	0	0
IG_VC_0446	0	5	0	0	0
IG_VC_0447	0	8	0	0	0
IG_VC_0449	0	60	0	0	0
IG_VC_0450	0	39	0	0	0
IG_VC_0453	0	13	0	0	0
IG_VC_0454	0	4	0	0	0
IG_VC_0455	0	12	0	0	0
IG_VC_0457	0	3	0	0	0
IG_VC_0460	0	2	0	0	0
IG_VC_0461	0	2	0	0	0
IG_VC_0462	0	3	0	0	0
IG_VC_0463	0	2	0	0	0
IG_VC_0464	0	5	0	0	0
IG_VC_0465	0	5	0	0	0
IG_VC_0466	0	1	0	0	0
IG_VC_0467	0	5	0	0	0
IG_VC_0469	0	1	0	0	0
IG_VC_0470	0	9	0	0	0
IG_VC_0471	0	10	0	0	0
IG_VC_0472	0	8	0	0	0
IG_VC_0473	0	24	0	0	0
IG_VC_0474	0	4	0	0	0
IG_VC_0475	0	16	0	0	0
IG_VC_0476	0	2	0	0	0
IG_VC_0477	0	8	0	0	0
IG_VC_0478	0	7	0	0	0
IG_VC_0479	0	14	0	0	0
IG_VC_0480	0	1	0	0	0
IG_VC_0481	0	7	0	0	0
IG_VC_0482	0	17	0	0	0
IG_VC_0483	0	5	0	0	0
IG_VC_0484	0	28	0	0	0
IG_VC_0485	0	4	0	0	0
IG_VC_0486	0	27	0	0	0
IG_VC_0487	0	8	0	0	0
IG_VC_0488	0	4	0	0	0
IG_VC_0489	0	14	0	0	0
IG_VC_0493	0	18	0	0	0
IG_VC_0494	0	38	0	0	0
IG_VC_0495	0	4	0	0	0
IG_VC_0496	0	5	0	0	0
IG_VC_0497	0	5	0	0	0
IG_VC_0498	0	4	0	0	0
IG_VC_0499	0	7	0	0	0
IG_VC_0500	0	2	0	0	0
IG_VC_0501	0	37	0	0	0
IG_VC_0502	0	34	0	0	0
IG_VC_0503	0	61	0	0	0
IG_VC_0504	0	18	0	0	0
IG_VC_0505	0	4	0	0	0
IG_VC_0506	0	1	0	0	0
IG_VC_0507	0	7	0	0	0
IG_VC_0509	0	2	0	0	0
IG_VC_0511	0	21	0	0	0
IG_VC_0513	0	146	0	0	0
IG_VC_0515	0	13	0	0	0
IG_VC_0516	0	53	0	0	0
IG_VC_0517	0	33	0	0	0
IG_VC_0518	0	9	0	0	0
IG_VC_0519	0	1	0	0	0
IG_VC_0520	0	3	0	0	0
IG_VC_0521	0	11	0	0	0
IG_VC_0522	0	12	0	0	0
IG_VC_0523	0	1	0	0	0
IG_VC_0524	0	12	0	0	0
IG_VC_0527	0	5	0	0	0
IG_VC_0530	0	3	0	0	0
IG_VC_0534	0	5	0	0	0
IG_VC_0535	0	4	0	0	0
IG_VC_0536	0	1	0	0	0
IG_VC_0537	0	6	0	0	0
IG_VC_0539	0	4	0	0	0
IG_VC_0540	0	1	0	0	0
IG_VC_0542	0	10	0	0	0
IG_VC_0544	0	3	0	0	0
IG_VC_0545	0	10	0	0	0
IG_VC_0546	0	4	0	0	0
IG_VC_0547	0	2	0	0	0
IG_VC_0548	0	7	0	0	0
IG_VC_0549	0	93	0	0	0
IG_VC_0550	0	3	0	0	0
IG_VC_0552	0	2	0	0	0
IG_VC_0556	0	3	0	0	0
IG_VC_0557	0	3	0	0	0
IG_VC_0558	0	4	0	0	0
IG_VC_0559	0	4	0	0	0
IG_VC_0560	0	19	0	0	0
IG_VC_0561	0	12	0	0	0
IG_VC_0562	0	7	0	0	0
IG_VC_0563	0	2	0	0	0
IG_VC_0564	0	7	0	0	0
IG_VC_0565	0	4	0	0	0
IG_VC_0566	0	10	0	0	0
IG_VC_0567	0	7	0	0	0
IG_VC_0568	0	14	0	0	0
IG_VC_0570	0	7	0	0	0
IG_VC_0573	0	14	0	0	0
IG_VC_0576	0	7	0	0	0
IG_VC_0578	0	2	0	0	0
IG_VC_0583	0	11	0	0	0
IG_VC_0586	0	2	0	0	0
IG_VC_0587	0	14	0	0	0
IG_VC_0588	0	7	0	0	0
IG_VC_0589	0	9	0	0	0
IG_VC_0591	0	2	0	0	0
IG_VC_0592	0	1	0	0	0
IG_VC_0596	0	1	0	0	0
IG_VC_0599	0	1	0	0	0
IG_VC_0601	0	5	0	0	0
IG_VC_0604	0	12	0	0	0
IG_VC_0605	0	8	0	0	0
IG_VC_0606	0	11	0	0	0
IG_VC_0608	0	7	0	0	0
IG_VC_0609	0	10	0	0	0
IG_VC_0611	0	4	0	0	0
IG_VC_0612	0	7	0	0	0
IG_VC_0613	0	6	0	0	0
IG_VC_0616	0	2	0	0	0
IG_VC_0617	0	2	0	0	0
IG_VC_0620	0	8	0	0	0
IG_VC_0621	0	38	0	0	0
IG_VC_0623	0	3	0	0	0
IG_VC_0624	0	2	0	0	0
IG_VC_0625	0	3	0	0	0
IG_VC_0626	0	1	0	0	0
IG_VC_0627	0	18	0	0	0
IG_VC_0628	0	8	0	0	0
IG_VC_0630	0	5	0	0	0
IG_VC_0631	0	10	0	0	0
IG_VC_0632	0	5	0	0	0
IG_VC_0633	0	4	0	0	0
IG_VC_0634	0	37	0	0	0
IG_VC_0635	0	3	0	0	0
IG_VC_0636	0	14	0	0	0
IG_VC_0637	0	16	0	0	0
IG_VC_0638	0	5	0	0	0
IG_VC_0639	0	2	0	0	0
IG_VC_0640	0	14	0	0	0
IG_VC_0642	0	1	0	0	0
IG_VC_0644	0	6	0	0	0
IG_VC_0646	0	8	0	0	0
IG_VC_0647	0	30	0	0	0
IG_VC_0648	0	8	0	0	0
IG_VC_0649	0	6	0	0	0
IG_VC_0650	0	9	0	0	0
IG_VC_0651	0	2	0	0	0
IG_VC_0653	0	6	0	0	0
IG_VC_0656	0	6	0	0	0
IG_VC_0659	0	14	0	0	0
IG_VC_0660	0	8	0	0	0
IG_VC_0661	0	7	0	0	0
IG_VC_0662	0	28	0	0	0
IG_VC_0663	0	15	0	0	0
IG_VC_0664	0	2	0	0	0
IG_VC_0666	0	33	0	0	0
IG_VC_0667	0	1	0	0	0
IG_VC_0668	0	7	0	0	0
IG_VC_0669	0	20	0	0	0
IG_VC_0674	0	4	0	0	0
IG_VC_0675	0	2	0	0	0
IG_VC_0676	0	7	0	0	0
IG_VC_0677	0	31	0	0	0
IG_VC_0678	0	13	0	0	0
IG_VC_0679	0	4	0	0	0
IG_VC_0680	0	15	0	0	0
IG_VC_0682	0	3	0	0	0
IG_VC_0683	0	2	0	0	0
IG_VC_0684	0	10	0	0	0
IG_VC_0685	0	4	0	0	0
IG_VC_0688	0	17	0	0	0
IG_VC_0689	0	1	0	0	0
IG_VC_0690	0	1	0	0	0
IG_VC_0691	0	1	0	0	0
IG_VC_0692	0	5	0	0	0
IG_VC_0693	0	2	0	0	0
IG_VC_0694	0	1	0	0	0
IG_VC_0695	0	20	0	0	0
IG_VC_0696	0	1	0	0	0
IG_VC_0697	0	1	0	0	0
IG_VC_0698	0	5	0	0	0
IG_VC_0699	0	12	0	0	0
IG_VC_0700	0	8	0	0	0
IG_VC_0702	0	2	0	0	0
IG_VC_0705	0	14	0	0	0
IG_VC_0706	0	15	0	0	0
IG_VC_0707	0	19	0	0	0
IG_VC_0711	0	8	0	0	0
IG_VC_0716	0	1	0	0	0
IG_VC_0718	0	7	0	0	0
IG_VC_0719	0	13	0	0	0
IG_VC_0720	0	2	0	0	0
IG_VC_0722	0	1	0	0	0
IG_VC_0724	0	17	0	0	0
IG_VC_0725	0	1	0	0	0
IG_VC_0726	0	1	0	0	0
IG_VC_0727	0	3	0	0	0
IG_VC_0728	0	2	0	0	0
IG_VC_0729	0	3	0	0	0
IG_VC_0730	0	3	0	0	0
IG_VC_0731	0	24	0	0	0
IG_VC_0732	0	20	0	0	0
IG_VC_0733	0	20	0	0	0
IG_VC_0734	0	17	0	0	0
IG_VC_0736	0	4	0	0	0
IG_VC_0737	0	7	0	0	0
IG_VC_0742	0	5	0	0	0
IG_VC_0743	0	1	0	0	0
IG_VC_0744	0	2	0	0	0
IG_VC_0745	0	11	0	0	0
IG_VC_0746	0	7	0	0	0
IG_VC_0747	0	9	0	0	0
IG_VC_0748	0	2	0	0	0
IG_VC_0749	0	3	0	0	0
IG_VC_0750	0	4	0	0	0
IG_VC_0751	0	2	0	0	0
IG_VC_0754	0	4	0	0	0
IG_VC_0755	0	8	0	0	0
IG_VC_0756	0	18	0	0	0
IG_VC_0757	0	11	0	0	0
IG_VC_0758	0	17	0	0	0
IG_VC_0760	0	3	0	0	0
IG_VC_0761	0	2	0	0	0
IG_VC_0763	0	16	0	0	0
IG_VC_0764	0	3	0	0	0
IG_VC_0765	0	25	0	0	0
IG_VC_0767	0	16	0	0	0
IG_VC_0768	0	7	0	0	0
IG_VC_0769	0	20	0	0	0
IG_VC_0770	0	15	0	0	0
IG_VC_0771	0	17	0	0	0
IG_VC_0772	0	6	0	0	0
IG_VC_0773	0	1	0	0	0
IG_VC_0774	0	10	0	0	0
IG_VC_0776	0	13	0	0	0
IG_VC_0779	0	4	0	0	0
IG_VC_0781	0	2	0	0	0
IG_VC_0783	0	9	0	0	0
IG_VC_0784	0	5	0	0	0
IG_VC_0785	0	23	0	0	0
IG_VC_0787	0	7	0	0	0
IG_VC_0788	0	9	0	0	0
IG_VC_0789	0	11	0	0	0
IG_VC_0792	0	6	0	0	0
IG_VC_0795	0	4	0	0	0
IG_VC_0796	0	27	0	0	0
IG_VC_0797	0	4	0	0	0
IG_VC_0802	0	30	0	0	0
IG_VC_0803	0	3	0	0	0
IG_VC_0804	0	12	0	0	0
IG_VC_0805	0	4	0	0	0
IG_VC_0806	0	4	0	0	0
IG_VC_0807	0	1	0	0	0
IG_VC_0810	0	16	0	0	0
IG_VC_0811	0	37	0	0	0
IG_VC_0812	0	11	0	0	0
IG_VC_0814	0	28	0	0	0
IG_VC_0816	0	15	0	0	0
IG_VC_0817	0	30	0	0	0
IG_VC_0818	0	3	0	0	0
IG_VC_0819	0	39	0	0	0
IG_VC_0820	0	9	0	0	0
IG_VC_0821	0	16	0	0	0
IG_VC_0822	0	13	0	0	0
IG_VC_0824	0	16	0	0	0
IG_VC_0825	0	24	0	0	0
IG_VC_0826	0	53	0	0	0
IG_VC_0829	0	11	0	0	0
IG_VC_0831	0	1	0	0	0
IG_VC_0834	0	1	0	0	0
IG_VC_0837	0	2	0	0	0
IG_VC_0838	0	28	0	0	0
IG_VC_0840	0	1	0	0	0
IG_VC_0841	0	1	0	0	0
IG_VC_0842	0	2	0	0	0
IG_VC_0843	0	2	0	0	0
IG_VC_0845	0	21	0	0	0
IG_VC_0846	0	69	0	0	0
IG_VC_0847	0	41	0	0	0
IG_VC_0848	0	41	0	0	0
IG_VC_0849	0	9	0	0	0
IG_VC_0851	0	1	0	0	0
IG_VC_0852	0	3	0	0	0
IG_VC_0853	0	13	0	0	0
IG_VC_0854	0	7	0	0	0
IG_VC_0856	0	12	0	0	0
IG_VC_0857	0	1	0	0	0
IG_VC_0858	0	6	0	0	0
IG_VC_0862	0	1	0	0	0
IG_VC_0864	0	3	0	0	0
IG_VC_0865	0	2	0	0	0
IG_VC_0866	0	12	0	0	0
IG_VC_0871	0	7	0	0	0
IG_VC_0873	0	6	0	0	0
IG_VC_0874	0	2	0	0	0
IG_VC_0877	0	2	0	0	0
IG_VC_0878	0	1	0	0	0
IG_VC_0880	0	14	0	0	0
IG_VC_0881	0	3	0	0	0
IG_VC_0883	0	28	0	0	0
IG_VC_0884	0	2	0	0	0
IG_VC_0887	0	7	0	0	0
IG_VC_0889	0	3	0	0	0
IG_VC_0890	0	2	0	0	0
IG_VC_0892	0	21	0	0	0
IG_VC_0893	0	1	0	0	0
IG_VC_0895	0	15	0	0	0
IG_VC_0896	0	13	0	0	0
IG_VC_0897	0	2	0	0	0
IG_VC_0898	0	1	0	0	0
IG_VC_0899	0	1	0	0	0
IG_VC_0900	0	22	0	0	0
IG_VC_0902	0	2	0	0	0
IG_VC_0903	0	2	0	0	0
IG_VC_0905	0	7	0	0	0
IG_VC_0908	0	21	0	0	0
IG_VC_0909	0	4	0	0	0
IG_VC_0910	0	14	0	0	0
IG_VC_0911	0	5	0	0	0
IG_VC_0912	0	25	0	0	0
IG_VC_0913	0	14	0	0	0
IG_VC_0915	0	4	0	0	0
IG_VC_0916	0	34	0	0	0
IG_VC_0917	0	31	0	0	0
IG_VC_0923	0	1	0	0	0
IG_VC_0928	0	20	0	0	0
IG_VC_0929	0	23	0	0	0
IG_VC_0930	0	20	0	0	0
IG_VC_0931	0	8	0	0	0
IG_VC_0932	0	11	0	0	0
IG_VC_0934	0	53	0	0	0
IG_VC_0935	0	6	0	0	0
IG_VC_0937	0	3	0	0	0
IG_VC_0940	0	13	0	0	0
IG_VC_0941	0	23	0	0	0
IG_VC_0942	0	7	0	0	0
IG_VC_0943	0	8	0	0	0
IG_VC_0945	0	17	0	0	0
IG_VC_0948	0	7	0	0	0
IG_VC_0953	0	5	0	0	0
IG_VC_0956	0	2	0	0	0
IG_VC_0958	0	4	0	0	0
IG_VC_0959	0	4	0	0	0
IG_VC_0960	0	8	0	0	0
IG_VC_0962	0	5	0	0	0
IG_VC_0963	0	18	0	0	0
IG_VC_0964	0	7	0	0	0
IG_VC_0966	0	8	0	0	0
IG_VC_0967	0	9	0	0	0
IG_VC_0968	0	1	0	0	0
IG_VC_0969	0	11	0	0	0
IG_VC_0970	0	12	0	0	0
IG_VC_0971	0	12	0	0	0
IG_VC_0973	0	5	0	0	0
IG_VC_0974	0	2	0	0	0
IG_VC_0975	0	3	0	0	0
IG_VC_0977	0	35	0	0	0
IG_VC_0978	0	9	0	0	0
IG_VC_0979	0	7	0	0	0
IG_VC_0980	0	4	0	0	0
IG_VC_0981	0	20	0	0	0
IG_VC_0982	0	3	0	0	0
IG_VC_0983	0	3	0	0	0
IG_VC_0985	0	13	0	0	0
IG_VC_0986	0	23	0	0	0
IG_VC_0987	0	10	0	0	0
IG_VC_0988	0	4	0	0	0
IG_VC_0989	0	18	0	0	0
IG_VC_0990	0	3	0	0	0
IG_VC_0991	0	8	0	0	0
IG_VC_0992	0	14	0	0	0
IG_VC_0993	0	14	0	0	0
IG_VC_0994	0	1	0	0	0
IG_VC_0995	0	35	0	0	0
IG_VC_0996	0	10	0	0	0
IG_VC_0997	0	2	0	0	0
IG_VC_0998	0	7	0	0	0
IG_VC_0999	0	9	0	0	0
IG_VC_1000	0	11	0	0	0
IG_VC_1001	0	6	0	0	0
IG_VC_1003	0	3	0	0	0
IG_VC_1004	0	1	0	0	0
IG_VC_1005	0	4	0	0	0
IG_VC_1006	0	4	0	0	0
IG_VC_1007	0	2	0	0	0
IG_VC_1008	0	5	0	0	0
IG_VC_1009	0	2	0	0	0
IG_VC_1010	0	8	0	0	0
IG_VC_1012	0	1	0	0	0
IG_VC_1018	0	52	0	0	0
IG_VC_1021	0	22	0	0	0
IG_VC_1024	0	26	0	0	0
IG_VC_1025	0	3	0	0	0
IG_VC_1028	0	1	0	0	0
IG_VC_1029	0	2	0	0	0
IG_VC_1030	0	7	0	0	0
IG_VC_1031	0	2	0	0	0
IG_VC_1035	0	5	0	0	0
IG_VC_1036	0	12	0	0	0
IG_VC_1038	0	11	0	0	0
IG_VC_1039	0	4	0	0	0
IG_VC_1040	0	5	0	0	0
IG_VC_1041	0	5	0	0	0
IG_VC_1042	0	1	0	0	0
IG_VC_1043	0	25	0	0	0
IG_VC_1044	0	19	0	0	0
IG_VC_1046	0	22	0	0	0
IG_VC_1048	0	8	0	0	0
IG_VC_1049	0	7	0	0	0
IG_VC_1050	0	20	0	0	0
IG_VC_1051	0	13	0	0	0
IG_VC_1053	0	5	0	0	0
IG_VC_1054	0	1	0	0	0
IG_VC_1055	0	2	0	0	0
IG_VC_1056	0	1	0	0	0
IG_VC_1057	0	6	0	0	0
IG_VC_1058	0	9	0	0	0
IG_VC_1059	0	3	0	0	0
IG_VC_1060	0	9	0	0	0
IG_VC_1061	0	6	0	0	0
IG_VC_1062	0	4	0	0	0
IG_VC_1064	0	10	0	0	0
IG_VC_1065	0	3	0	0	0
IG_VC_1066	0	5	0	0	0
IG_VC_1067	0	8	0	0	0
IG_VC_1069	0	6	0	0	0
IG_VC_1070	0	2	0	0	0
IG_VC_1071	0	2	0	0	0
IG_VC_1072	0	12	0	0	0
IG_VC_1073	0	23	0	0	0
IG_VC_1074	0	5	0	0	0
IG_VC_1075	0	19	0	0	0
IG_VC_1076	0	1	0	0	0
IG_VC_1078	0	5	0	0	0
IG_VC_1079	0	2	0	0	0
IG_VC_1080	0	20	0	0	0
IG_VC_1082	0	3	0	0	0
IG_VC_1084	0	2	0	0	0
IG_VC_1085	0	1	0	0	0
IG_VC_1087	0	2	0	0	0
IG_VC_1088	0	1	0	0	0
IG_VC_1090	0	3	0	0	0
IG_VC_1091	0	34	0	0	0
IG_VC_1092	0	8	0	0	0
IG_VC_1093	0	3	0	0	0
IG_VC_1094	0	1	0	0	0
IG_VC_1097	0	8	0	0	0
IG_VC_1098	0	12	0	0	0
IG_VC_1099	0	22	0	0	0
IG_VC_1100	0	7	0	0	0
IG_VC_1101	0	38	0	0	0
IG_VC_1102	0	6	0	0	0
IG_VC_1104	0	11	0	0	0
IG_VC_1105	0	2	0	0	0
IG_VC_1106	0	11	0	0	0
IG_VC_1107	0	7	0	0	0
IG_VC_1110	0	1	0	0	0
IG_VC_1111	0	4	0	0	0
IG_VC_1112	0	14	0	0	0
IG_VC_1116	0	5	0	0	0
IG_VC_1117	0	16	0	0	0
IG_VC_1118	0	19	0	0	0
IG_VC_1120	0	1	0	0	0
IG_VC_1126	0	6	0	0	0
IG_VC_1127	0	4	0	0	0
IG_VC_1128	0	2	0	0	0
IG_VC_1129	0	15	0	0	0
IG_VC_1130	0	2	0	0	0
IG_VC_1131	0	62	0	0	0
IG_VC_1131.1	0	14	0	0	0
IG_VC_1132	0	7	0	0	0
IG_VC_1134	0	1	0	0	0
IG_VC_1135	0	1	0	0	0
IG_VC_1137	0	1	0	0	0
IG_VC_1140	0	15	0	0	0
IG_VC_1141	0	3	0	0	0
IG_VC_1142	0	4	0	0	0
IG_VC_1143	0	35	0	0	0
IG_VC_1144	0	2	0	0	0
IG_VC_1145	0	3	0	0	0
IG_VC_1146	0	14	0	0	0
IG_VC_1147	0	14	0	0	0
IG_VC_1148	0	4	0	0	0
IG_VC_1149	0	18	0	0	0
IG_VC_1150	0	4	0	0	0
IG_VC_1151	0	8	0	0	0
IG_VC_1152	0	1	0	0	0
IG_VC_1153	0	30	0	0	0
IG_VC_1154	0	8	0	0	0
IG_VC_1155	0	13	0	0	0
IG_VC_1158	0	11	0	0	0
IG_VC_1159	0	3	0	0	0
IG_VC_1160	0	3	0	0	0
IG_VC_1163	0	14	0	0	0
IG_VC_1164	0	10	0	0	0
IG_VC_1165	0	7	0	0	0
IG_VC_1166	0	20	0	0	0
IG_VC_1167	0	4	0	0	0
IG_VC_1168	0	5	0	0	0
IG_VC_1169	0	11	0	0	0
IG_VC_1171	0	3	0	0	0
IG_VC_1176	0	3	0	0	0
IG_VC_1177	0	9	0	0	0
IG_VC_1179	0	7	0	0	0
IG_VC_1180	0	6	0	0	0
IG_VC_1182	0	12	0	0	0
IG_VC_1183	0	36	0	0	0
IG_VC_1185	0	20	0	0	0
IG_VC_1186	0	7	0	0	0
IG_VC_1189	0	28	0	0	0
IG_VC_1190	0	12	0	0	0
IG_VC_1191	0	5	0	0	0
IG_VC_1192	0	7	0	0	0
IG_VC_1193	0	5	0	0	0
IG_VC_1194	0	10	0	0	0
IG_VC_1195	0	3	0	0	0
IG_VC_1196	0	5	0	0	0
IG_VC_1197	0	9	0	0	0
IG_VC_1198	0	10	0	0	0
IG_VC_1200	0	18	0	0	0
IG_VC_1201	0	9	0	0	0
IG_VC_1202	0	12	0	0	0
IG_VC_1206	0	7	0	0	0
IG_VC_1207	0	4	0	0	0
IG_VC_1208	0	7	0	0	0
IG_VC_1210	0	12	0	0	0
IG_VC_1211	0	11	0	0	0
IG_VC_1213	0	24	0	0	0
IG_VC_1215	0	5	0	0	0
IG_VC_1216	0	46	0	0	0
IG_VC_1218	0	11	0	0	0
IG_VC_1219	0	1	0	0	0
IG_VC_1220	0	3	0	0	0
IG_VC_1221	0	18	0	0	0
IG_VC_1222	0	2	0	0	0
IG_VC_1225	0	3	0	0	0
IG_VC_1226	0	6	0	0	0
IG_VC_1229	0	9	0	0	0
IG_VC_1230	0	4	0	0	0
IG_VC_1232	0	14	0	0	0
IG_VC_1234	0	2	0	0	0
IG_VC_1235	0	8	0	0	0
IG_VC_1236	0	20	0	0	0
IG_VC_1237	0	35	0	0	0
IG_VC_1241	0	13	0	0	0
IG_VC_1242	0	5	0	0	0
IG_VC_1246	0	24	0	0	0
IG_VC_1247	0	11	0	0	0
IG_VC_1248	0	1	0	0	0
IG_VC_1249	0	17	0	0	0
IG_VC_1250	0	14	0	0	0
IG_VC_1252	0	6	0	0	0
IG_VC_1253	0	16	0	0	0
IG_VC_1254	0	5	0	0	0
IG_VC_1256	0	3	0	0	0
IG_VC_1257	0	37	0	0	0
IG_VC_1258	0	25	0	0	0
IG_VC_1259	0	18	0	0	0
IG_VC_1261	0	19	0	0	0
IG_VC_1262	0	17	0	0	0
IG_VC_1263	0	13	0	0	0
IG_VC_1264	0	11	0	0	0
IG_VC_1265	0	13	0	0	0
IG_VC_1268	0	14	0	0	0
IG_VC_1269	0	13	0	0	0
IG_VC_1270	0	5	0	0	0
IG_VC_1272	0	7	0	0	0
IG_VC_1273	0	29	0	0	0
IG_VC_1274	0	5	0	0	0
IG_VC_1275	0	1	0	0	0
IG_VC_1276	0	3	0	0	0
IG_VC_1279	0	23	0	0	0
IG_VC_1280	0	10	0	0	0
IG_VC_1281	0	27	0	0	0
IG_VC_1282	0	8	0	0	0
IG_VC_1283	0	2	0	0	0
IG_VC_1285	0	2	0	0	0
IG_VC_1286	0	5	0	0	0
IG_VC_1287	0	12	0	0	0
IG_VC_1288	0	2	0	0	0
IG_VC_1289	0	31	0	0	0
IG_VC_1290	0	7	0	0	0
IG_VC_1292	0	20	0	0	0
IG_VC_1294	0	10	0	0	0
IG_VC_1296	0	40	0	0	0
IG_VC_1297	0	3	0	0	0
IG_VC_1298	0	5	0	0	0
IG_VC_1300	0	2	0	0	0
IG_VC_1301	0	9	0	0	0
IG_VC_1302	0	17	0	0	0
IG_VC_1303	0	14	0	0	0
IG_VC_1304	0	11	0	0	0
IG_VC_1305	0	12	0	0	0
IG_VC_1306	0	16	0	0	0
IG_VC_1308	0	4	0	0	0
IG_VC_1310	0	2	0	0	0
IG_VC_1311	0	2	0	0	0
IG_VC_1312	0	7	0	0	0
IG_VC_1313	0	3	0	0	0
IG_VC_1314	0	26	0	0	0
IG_VC_1317	0	1	0	0	0
IG_VC_1318	0	3	0	0	0
IG_VC_1319	0	15	0	0	0
IG_VC_1320	0	2	0	0	0
IG_VC_1321	0	32	0	0	0
IG_VC_1322	0	6	0	0	0
IG_VC_1324	0	32	0	0	0
IG_VC_1326	0	1	0	0	0
IG_VC_1329	0	40	0	0	0
IG_VC_1330	0	24	0	0	0
IG_VC_1332	0	2	0	0	0
IG_VC_1334	0	11	0	0	0
IG_VC_1335	0	44	0	0	0
IG_VC_1337	0	7	0	0	0
IG_VC_1338	0	3	0	0	0
IG_VC_1341	0	9	0	0	0
IG_VC_1342	0	3	0	0	0
IG_VC_1343	0	4	0	0	0
IG_VC_1344	0	29	0	0	0
IG_VC_1346	0	1	0	0	0
IG_VC_1350	0	5	0	0	0
IG_VC_1351	0	20	0	0	0
IG_VC_1352	0	2	0	0	0
IG_VC_1353	0	14	0	0	0
IG_VC_1354	0	2	0	0	0
IG_VC_1355	0	9	0	0	0
IG_VC_1356	0	5	0	0	0
IG_VC_1358	0	3	0	0	0
IG_VC_1359	0	17	0	0	0
IG_VC_1360	0	1	0	0	0
IG_VC_1362	0	11	0	0	0
IG_VC_1363	0	30	0	0	0
IG_VC_1364	0	4	0	0	0
IG_VC_1365	0	24	0	0	0
IG_VC_1368	0	17	0	0	0
IG_VC_1369	0	11	0	0	0
IG_VC_1373	0	8	0	0	0
IG_VC_1374	0	1	0	0	0
IG_VC_1376	0	28	0	0	0
IG_VC_1377	0	4	0	0	0
IG_VC_1379	0	2	0	0	0
IG_VC_1380	0	2	0	0	0
IG_VC_1381	0	2	0	0	0
IG_VC_1384	0	4	0	0	0
IG_VC_1385	0	2	0	0	0
IG_VC_1386	0	6	0	0	0
IG_VC_1387	0	1	0	0	0
IG_VC_1389	0	13	0	0	0
IG_VC_1391	0	4	0	0	0
IG_VC_1392	0	12	0	0	0
IG_VC_1393	0	9	0	0	0
IG_VC_1394	0	5	0	0	0
IG_VC_1402	0	1	0	0	0
IG_VC_1404	0	11	0	0	0
IG_VC_1405	0	28	0	0	0
IG_VC_1406	0	9	0	0	0
IG_VC_1407	0	15	0	0	0
IG_VC_1408	0	3	0	0	0
IG_VC_1409	0	10	0	0	0
IG_VC_1414	0	11	0	0	0
IG_VC_1415	0	9	0	0	0
IG_VC_1416	0	8	0	0	0
IG_VC_1420	0	16	0	0	0
IG_VC_1421	0	5	0	0	0
IG_VC_1422	0	6	0	0	0
IG_VC_1423	0	40	0	0	0
IG_VC_1424	0	9	0	0	0
IG_VC_1425	0	12	0	0	0
IG_VC_1429	0	21	0	0	0
IG_VC_1432	0	4	0	0	0
IG_VC_1433	0	10	0	0	0
IG_VC_1434	0	11	0	0	0
IG_VC_1435	0	10	0	0	0
IG_VC_1439	0	6	0	0	0
IG_VC_1440	0	2	0	0	0
IG_VC_1441	0	1	0	0	0
IG_VC_1442	0	1	0	0	0
IG_VC_1443	0	16	0	0	0
IG_VC_1444	0	9	0	0	0
IG_VC_1446	0	4	0	0	0
IG_VC_1449	0	36	0	0	0
IG_VC_1450	0	1	0	0	0
IG_VC_1452	0	35	0	0	0
IG_VC_1453	0	9	0	0	0
IG_VC_1455	0	12	0	0	0
IG_VC_1456	0	37	0	0	0
IG_VC_1458	0	9	0	0	0
IG_VC_1462	0	8	0	0	0
IG_VC_1464	0	12	0	0	0
IG_VC_1465	0	29	0	0	0
IG_VC_1467	0	4	0	0	0
IG_VC_1468	0	9	0	0	0
IG_VC_1470	0	14	0	0	0
IG_VC_1471	0	74	0	0	0
IG_VC_1473	0	4	0	0	0
IG_VC_1474	0	9	0	0	0
IG_VC_1476	0	14	0	0	0
IG_VC_1477	0	19	0	0	0
IG_VC_1479	0	73	0	0	0
IG_VC_1480	0	5	0	0	0
IG_VC_1483	0	4	0	0	0
IG_VC_1484	0	6	0	0	0
IG_VC_1485	0	10	0	0	0
IG_VC_1489	0	22	0	0	0
IG_VC_1490	0	4	0	0	0
IG_VC_1491	0	11	0	0	0
IG_VC_1492	0	3	0	0	0
IG_VC_1493	0	21	0	0	0
IG_VC_1494	0	1	0	0	0
IG_VC_1495	0	11	0	0	0
IG_VC_1496	0	8	0	0	0
IG_VC_1497	0	2	0	0	0
IG_VC_1498	0	6	0	0	0
IG_VC_1500	0	4	0	0	0
IG_VC_1502	0	1	0	0	0
IG_VC_1503	0	18	0	0	0
IG_VC_1504	0	2	0	0	0
IG_VC_1507	0	6	0	0	0
IG_VC_1508	0	1	0	0	0
IG_VC_1509	0	8	0	0	0
IG_VC_1510	0	10	0	0	0
IG_VC_1513	0	1	0	0	0
IG_VC_1515	0	6	0	0	0
IG_VC_1517	0	16	0	0	0
IG_VC_1519	0	5	0	0	0
IG_VC_1520	0	10	0	0	0
IG_VC_1521	0	13	0	0	0
IG_VC_1523	0	21	0	0	0
IG_VC_1528	0	7	0	0	0
IG_VC_1530	0	1	0	0	0
IG_VC_1531	0	2	0	0	0
IG_VC_1532	0	12	0	0	0
IG_VC_1533	0	8	0	0	0
IG_VC_1537	0	6	0	0	0
IG_VC_1539	0	35	0	0	0
IG_VC_1540	0	35	0	0	0
IG_VC_1541	0	19	0	0	0
[truncated: 4,642 more rows]
