# Supplementary material for: BipA exerts temperature-dependent translational control of biofilm-associated colony morphology in Vibrio cholerae
Source: eLife. 2021 Feb 16;10:e60607. doi: 10.7554/eLife.60607 (PMC7886329; doi:10.7554/eLife.60607)
Supplement: Supplementary file 7. [file elife-60607-supp7.xlsx]

## Sheet: Hoja1
Tnseq library Vc co969 smooth colonies at 37ºC: mutated genes ordered by total reads/clone
OBS! Only genes with number of genes per clone >1 are considered as candidates
Locus	# of hit TAs	Total TAs	Fraction TAs hit	Total reads	Avg_Reads per TA	Reads per clone	Gene
VC_0921	10	96	0.104	63551	662	17.5895	vpsE
VC_0374	6	65	0.092	60442	929.9	16.729	pgi (Glucose-6-phosphate isomerase)
VC_2726	6	42	0.143	55941	1331.9	15.4833	putative General secretion pathway protein K
VC_0604	7	110	0.064	52592	478.1	14.5563	acnB (Aconitate hydratase 2)
VC_2290	11	63	0.175	44542	707	12.3283	nqrF (Na(+)-translocating NADH-quinone reductase subunit F)
VC_0937	10	109	0.092	39454	362	10.92	vpsO
VC_0665	10	58	0.172	38616	665.8	10.6881	putative sigma-54 dependent transcriptional regulator
VC_2414	4	108	0.037	33561	310.8	9.28896	aceE (Pyruvate dehydrogenase E1 component)
VC_0922	10	92	0.109	33545	364.6	9.28453	vpsF
VC_2092	5	65	0.077	33477	515	9.26571	gltA (citrate synthase)
VC_0917	6	51	0.118	29243	573.4	8.09383	vpsA
VC_0935	7	63	0.111	27817	441.5	7.69914	vpsM
VC_A0074	9	51	0.176	27062	530.6	7.49017	putative Transcriptional regulator CdgA
VC_0918	9	56	0.161	26302	469.7	7.27982	vpsB
VC_2436	6	60	0.1	24951	415.9	6.9059	Outer membrane protein tolC
VC_2701	8	68	0.118	22225	326.8	6.1514	Thiol:disulfide interchange protein DsbD
VC_0934	8	79	0.101	20765	262.8	5.7473	vpsL
VC_2087	3	113	0.027	20026	177.2	5.54276	sucA (2-oxoglutarate dehydrogenase E1 component)
VC_1920	7	93	0.075	19301	207.5	5.3421	ATP-dependent Lon protease
VC_0925	4	52	0.077	18911	363.7	5.23415	vpsI
VC_0920	7	61	0.115	16705	273.9	4.62358	vpsD
VC_2291	5	38	0.132	16585	436.4	4.59037	nqrE (Na(+)-translocating NADH-quinone reductase subunit E)
VC_0927	4	33	0.121	15296	463.5	4.2336	vpsK
VC_2089	5	80	0.062	14860	185.8	4.11293	sdhA (succinate dehydrogenase, flavoprotein subunit)
VC_2091	1	13	0.077	13392	1030.2	3.70662	sdhC (Succinate dehydrogenase cytochrome b556 subunit)
VC_2051	4	28	0.143	13373	477.6	3.70136	cytochrome c biogenesis protein CcmG, thiol:disulfide interchange protein DsbE
VC_1442	6	85	0.071	13327	156.8	3.68862	ctaD (Cytochrome c oxidase subunit 1)
VC_0094	2	47	0.043	13271	282.4	3.67312	ubiA (4-hydroxybenzoate octaprenyltransferase)
IG_VC_1933	3	10	0.3	12427	1242.7	3.43952	putative molybdopterin cofactor (Moco) binding domain protein
VC_1437	8	119	0.067	12228	102.8	3.38445	putative Lipid A biosynthesis (KDO)2-(lauroyl)-lipid IVA acyltransferase
VC_2293	4	30	0.133	11478	382.6	3.17686	nqrC (Na(+)-translocating NADH-quinone reductase subunit C)
VC_0924	3	70	0.043	11116	158.8	3.07667	vpsH
VC_A0075	5	27	0.185	10759	398.5	2.97786	putative molybdopterin binding domain, Sulfite oxidase (SO), family protein
VC_2294	3	60	0.05	10462	174.4	2.89565	nqrB (Na(+)-translocating NADH-quinone reductase subunit B)
VC_1141	4	96	0.042	10325	107.6	2.85774	icd (Isocitrate dehydrogenase [NADP])
VC_2052	5	89	0.056	9886	111.1	2.73623	ccmF (Cytochrome c-type biogenesis protein ccmF)
VC_A0039	4	18	0.222	9670	537.2	2.67645	hypothetical protein (140 aa)
VC_2086	1	51	0.02	8508	166.8	2.35483	sucB (Dihydrolipoyllysine-residue succinyltransferase component of 2-oxoglutarate dehydrogenase complex)
VC_A0040	4	47	0.085	8298	176.6	2.29671	conserved hypothetical protein (putative membrane protein)
VC_2153	2	34	0.059	8261	243	2.28647	D,D-carboxypeptidase-like protein
VC_1730	3	99	0.03	8008	80.9	2.21644	topA (DNA topoisomerase 1)
VC_2413	3	60	0.05	7727	128.8	2.13867	aceF (Dihydrolipoyllysine-residue acetyltransferase component of pyruvate dehydrogenase complex)
VC_2733	1	71	0.014	7473	105.3	2.06836	epsD (General secretion pathway protein D)
VC_2210	2	44	0.045	7333	166.7	2.02962	Vibriobactin utilization protein viuB
VC_0936	4	22	0.182	6601	300	1.82701	vpsJ
VC_2724	1	17	0.059	5760	338.8	1.59424	epsM (General secretion pathway protein M)
VC_2053	3	23	0.13	5663	246.2	1.5674	ccmE (Cytochrome c-type biogenesis protein ccmE)
VC_A0774	2	60	0.033	5553	92.5	1.53695	galE (UDP-glucose 4-epimerase)
VC_2090	1	23	0.043	5271	229.2	1.4589	sdhD (Succinate dehydrogenase hydrophobic membrane anchor subunit)
VC_1435	2	36	0.056	5058	140.5	1.39994	conserved hypothetical protein (orthology with cytochrome biogenesis protein or possible membrane copper tolerance protein)
VC_2544	4	38	0.105	5027	132.3	1.39136	fbp (Fructose-1,6-bisphosphatase class 1)
VC_1441	3	29	0.103	5015	172.9	1.38804	ccoO (Cytochrome c oxidase monoheme subunit)
VC_2418	1	36	0.028	4719	131.1	1.30612	dsbC (Thiol:disulfide interchange protein DsbC)
VC_1439	3	51	0.059	4684	91.8	1.29643	ccoP (Cytochrome c oxidase diheme subunit)
VC_0036	2	61	0.033	4427	72.6	1.2253	putative Cytochrome c oxidase cbb3 type, accessory protein FixG
VC_0594	4	49	0.082	3987	81.4	1.10352	pcnB (Poly(A) polymerase)
VC_2295	2	56	0.036	3968	70.9	1.09826	nqrA (Na(+)-translocating NADH-quinone reductase subunit A)
VC_0576	1	31	0.032	3950	127.4	1.09327	sspA (stringent starvation protein A)
VC_2453	1	113	0.009	3674	32.5	1.01688	Signal transduction histidine-protein kinase barA
VC_2088	1	37	0.027	3673	99.3	1.01661	sdhB (succinate dehydrogenase iron-sulfur subunit)
VC_A0038	2	34	0.059	3670	107.9	1.01578	putative Cytochrome oxidase biogenesis protein Sco1/SenC/PrrC, putative copper metallochaperone
VC_2292	1	37	0.027	3008	81.3	0.832549	nqrD (Na(+)-translocating NADH-quinone reductase subunit D)
VC_2614	3	24	0.125	2819	117.5	0.780238	crp (Catabolite gene activator)
VC_1867	1	59	0.017	2781	47.1	0.76972	hypothetical protein (OBS VC1868 MCP)
VC_0328	1	188	0.005	2718	14.5	0.752283	rpoB (DNA-directed RNA polymerase subunit beta)
IG_VC_A0844	1	4	0.25	2692	673	0.745087	VCA0843 glyceraldehyde-3-phosphate dehydrogenase; VCA0844 entry not found; VCA0845 hypothetical protein 74 aa; VCA0846 hypothetical protein)
VC_0926	1	59	0.017	2597	44	0.718793	vpsJ
VC_0919	3	38	0.079	2547	67	0.704954	vpsC
VC_2412	1	55	0.018	2438	44.3	0.674785	lpd (Dihydrolipoyl dehydrogenase)
VC_A0895	2	138	0.014	2407	17.4	0.666205	putative c-di-GMP phosphodiesterase class II with HAMP domain
VC_0395	1	43	0.023	2238	52	0.61943	gtaB (UTP--glucose-1-phosphate uridylyltransferase)
VC_0303	5	144	0.035	2227	15.5	0.616385	putative sensor histidine kinase
IG_VC_0512	3	77	0.039	2190	28.4	0.606144	VC0512 putative methyl-accepting chemotaxis protein; VC0510 DNA repair protein RadC-like protein
VC_A0016	2	92	0.022	2154	23.4	0.59618	entry not found; VCA0017 Haemolysin co-regulated protein (putative Type VI secretion system effector, Hcp1)
VC_1748	1	35	0.029	2012	57.5	0.556878	hypothetical protein (lipoprotein)
VC_0386	1	44	0.023	1908	43.4	0.528093	cysH (Phosphoadenosine phosphosulfate reductase)
VC_A0894	1	26	0.038	1891	72.7	0.523388	putative Polymerase and histidinol phosphatase-like protein
VC_A1113	1	58	0.017	1828	31.5	0.505951	putative ABC transporter, periplasmic spermidine putrescine-binding protein potD
VC_0525	1	18	0.056	1807	100.4	0.500138	putative 7,8-dihydro-6-hydroxymethylpterin-pyrophosphokinase FolK
VC_2055	1	34	0.029	1799	52.9	0.497924	heme exporter protein C
VC_1018	2	91	0.022	1656	18.2	0.458345	urvB (fragment of UvrABC system protein B (part 2))
VC_A0262	1	20	0.05	1542	77.1	0.426792	hypothetical protein (136 aa)
VC_2057	2	24	0.083	1425	59.4	0.394409	cytochrome c biogenesis protein CcmA
VC_A0196	1	26	0.038	1402	53.9	0.388043	entry not found; VCA0197 guanosine 5'-monophosphate oxidoreductase; VCA0195 hypothetical protein (OmpA-like transmembrane domain-containing)
VC_0943	2	42	0.048	1346	32	0.372544	lipA (Lipoyl synthase)
VC_A0368	1	49	0.02	1324	27	0.366454	hypothetical protein
IG_VC_0665	1	24	0.042	1300	54.2	0.359812	VC0665 putative sigma-54 dependent transcriptional regulator; VC0664 lysyl-tRNA synthetase; VC0666 hypotehtical protein (83 aa)
VC_0944	2	33	0.061	979	29.7	0.270966	lipB (Octanoyltransferase)
VC_1210	1	34	0.029	893	26.3	0.247163	hypothetical protein
VC_2765	1	41	0.024	789	19.2	0.218378	atpG (ATP synthase gamma chain)
IG_VC_2291	1	4	0.25	646	161.5	0.178799	VC2291 nqrE (Na(+)-translocating NADH-quinone reductase subunit E); VC2292 Na(+)-translocating NADH-quinone reductase subunit D
VC_1899	1	71	0.014	571	8	0.15804	hypothetical protein
VC_A0351	2	38	0.053	546	14.4	0.151121	hypothetical protein
VC_A0402	2	34	0.059	532	15.6	0.147246	acetyltransferase
IG_VC_A0390	1	15	0.067	528	35.2	0.146139	no entry found; VCA0391 Plasmid stabilization system HigB protein (Toxin of TA system HigB-HigA) (117 aa); VCA0389 hypothetical protein (77 aa)
IG_VC_A0422	1	13	0.077	528	40.6	0.146139	VCA0422 hypothetical protein (prevent host death protein, Phd antitoxin) (97 aa); VCA0421 hypothetical protein (lipoprotein, 141 aa)
IG_VC_A0434	1	8	0.125	528	66	0.146139	entry not found; VCA0433 hypothetical protein; VCA0435 hypothetical protein (59 aa) (only orthologs in Vibrio)
VC_A0388	1	53	0.019	528	10	0.146139	hypothetical protein
IG_VC_A0330	3	81	0.037	397	4.9	0.109881	VCA0330 hypothetical protein; VCA0329b hypothetical protein (thiol:disulfide interchange protein DsbD)
IG_VC_A0307	1	12	0.083	377	31.4	0.104345	VCA0307 hypothetical protein (restriction endonuclease); VCA0306 hypothetical protein (60 aa, only orthologs in Vibrio)
IG_VC_A0495	1	8	0.125	377	47.1	0.104345	VCA0495 hypothetical protein; VCA0494 hypothetical protein (58 aa)
IG_VC_A0418	2	39	0.051	264	6.8	0.0730695
IG_VC_A0383	2	58	0.034	262	4.5	0.0725159
IG_VC_A0391	2	39	0.051	259	6.6	0.0716856
IG_VC_A0417	1	17	0.059	244	14.4	0.0675339
IG_VC_2752	25	647	0.039	218	0.3	0.0603377
VC_0419	2	55	0.036	207	3.8	0.0572931
IG_VC_A0463	3	70	0.043	165	2.4	0.0456684
VC_A0380	2	30	0.067	153	5.1	0.0423471
IG_VC_A0415	1	6	0.167	143	23.8	0.0395793
IG_VC_A0396	1	10	0.1	139	13.9	0.0384722
IG_VC_A0492	1	4	0.25	139	34.8	0.0384722
IG_VC_A0317	1	4	0.25	135	33.8	0.0373651
IG_VC_A0465	1	8	0.125	135	16.9	0.0373651
IG_VC_A0304	1	11	0.091	133	12.1	0.0368115
IG_VC_A0313	1	16	0.062	133	8.3	0.0368115
IG_VC_A0357	1	28	0.036	133	4.8	0.0368115
IG_VC_A0387	1	14	0.071	133	9.5	0.0368115
IG_VC_A0398	1	5	0.2	133	26.6	0.0368115
IG_VC_A0426	1	8	0.125	133	16.6	0.0368115
IG_VC_A0450	1	6	0.167	133	22.2	0.0368115
IG_VC_A0466	1	22	0.045	133	6	0.0368115
IG_VC_A0479	1	5	0.2	133	26.6	0.0368115
VC_A0464	1	21	0.048	133	6.3	0.0368115
IG_VC_A0433	2	8	0.25	132	16.5	0.0365347
IG_VC_A0346	2	15	0.133	131	8.7	0.036258
IG_VC_A0467	1	21	0.048	131	6.2	0.036258
IG_VC_A0407	1	13	0.077	130	10	0.0359812
IG_VC_A0425	1	13	0.077	130	10	0.0359812
IG_VC_A0451	1	7	0.143	130	18.6	0.0359812
VC_A0359	1	13	0.077	130	10	0.0359812
IG_VC_A0293	1	7	0.143	129	18.4	0.0357044
IG_VC_A0300	1	8	0.125	129	16.1	0.0357044
IG_VC_A0302	1	7	0.143	129	18.4	0.0357044
IG_VC_A0308	1	8	0.125	129	16.1	0.0357044
IG_VC_A0316	1	6	0.167	129	21.5	0.0357044
IG_VC_A0318	1	10	0.1	129	12.9	0.0357044
IG_VC_A0323	1	6	0.167	129	21.5	0.0357044
IG_VC_A0329	1	7	0.143	129	18.4	0.0357044
IG_VC_A0338	1	5	0.2	129	25.8	0.0357044
IG_VC_A0340	1	15	0.067	129	8.6	0.0357044
IG_VC_A0341	1	6	0.167	129	21.5	0.0357044
IG_VC_A0342	1	8	0.125	129	16.1	0.0357044
IG_VC_A0345	1	6	0.167	129	21.5	0.0357044
IG_VC_A0352	1	15	0.067	129	8.6	0.0357044
IG_VC_A0358	1	12	0.083	129	10.8	0.0357044
IG_VC_A0365	1	7	0.143	129	18.4	0.0357044
IG_VC_A0376	1	12	0.083	129	10.8	0.0357044
IG_VC_A0381	1	10	0.1	129	12.9	0.0357044
IG_VC_A0401	1	7	0.143	129	18.4	0.0357044
IG_VC_A0403	1	7	0.143	129	18.4	0.0357044
IG_VC_A0405	1	17	0.059	129	7.6	0.0357044
IG_VC_A0406	1	7	0.143	129	18.4	0.0357044
IG_VC_A0408	1	7	0.143	129	18.4	0.0357044
IG_VC_A0413	1	9	0.111	129	14.3	0.0357044
IG_VC_A0429	1	17	0.059	129	7.6	0.0357044
IG_VC_A0437	1	12	0.083	129	10.8	0.0357044
IG_VC_A0439	1	13	0.077	129	9.9	0.0357044
IG_VC_A0446	1	22	0.045	129	5.9	0.0357044
IG_VC_A0461	1	6	0.167	129	21.5	0.0357044
IG_VC_A0480	1	15	0.067	129	8.6	0.0357044
IG_VC_A0481	1	14	0.071	129	9.2	0.0357044
VC_A0360	1	27	0.037	129	4.8	0.0357044
VC_A0377	1	5	0.2	129	25.8	0.0357044
VC_A0395	1	49	0.02	129	2.6	0.0357044
VC_A0397	1	36	0.028	129	3.6	0.0357044
VC_A0420	1	17	0.059	129	7.6	0.0357044
VC_A0502	1	8	0.125	129	16.1	0.0357044
IG_VC_A0322	1	8	0.125	116	14.5	0.0321063
IG_VC_A0339	1	10	0.1	116	11.6	0.0321063
IG_VC_A0343	1	7	0.143	116	16.6	0.0321063
IG_VC_A0374	1	6	0.167	116	19.3	0.0321063
IG_VC_A0410	1	8	0.125	116	14.5	0.0321063
IG_VC_A0490	1	6	0.167	116	19.3	0.0321063
IG_VC_A0499	1	4	0.25	116	29	0.0321063
IG_VC_A0501	1	15	0.067	116	7.7	0.0321063
IG_VC_A0389	1	14	0.071	104	7.4	0.0287849
IG_VC_A0404	1	13	0.077	104	8	0.0287849
IG_VC_A0485	1	5	0.2	104	20.8	0.0287849
VC_A0424	1	19	0.053	104	5.5	0.0287849
VC_0866	2	70	0.029	103	1.5	0.0285082
IG_VC_0060	12	315	0.038	89	0.3	0.0246333
IG_VC_0161	12	300	0.04	87	0.3	0.0240797
IG_VC_0389	12	329	0.036	87	0.3	0.0240797
IG_VC_0714	11	307	0.036	87	0.3	0.0240797
IG_VC_2495	11	305	0.036	85	0.3	0.0235262
IG_VC_0315	11	305	0.036	83	0.3	0.0229726
VC_A0736	1	104	0.01	80	0.8	0.0221423
VC_A0849	5	394	0.013	78	0.2	0.0215887
VC_0200	4	101	0.04	75	0.7	0.0207584
IG_VC_2614	1	20	0.05	70	3.5	0.0193745
VC_0773	1	37	0.027	66	1.8	0.0182674
VC_0581	2	86	0.023	63	0.7	0.017437
IG_VC_0549	6	93	0.065	60	0.6	0.0166067
VC_0777	2	45	0.044	59	1.3	0.0163299
VC_0069	4	65	0.062	58	0.9	0.0160531
VC_0061	2	105	0.019	54	0.5	0.014946
VC_0280	3	51	0.059	54	1.1	0.014946
VC_2703	1	69	0.014	54	0.8	0.014946
VC_2645	2	47	0.043	53	1.1	0.0146692
IG_VC_1720	1	15	0.067	52	3.5	0.0143925
VC_0755	1	52	0.019	50	1	0.0138389
VC_2750	17	139	0.122	50	0.4	0.0138389
VC_1784	2	129	0.016	49	0.4	0.0135621
VC_0033	4	42	0.095	47	1.1	0.0130086
VC_0629	3	135	0.022	47	0.3	0.0130086
VC_1073	2	120	0.017	47	0.4	0.0130086
VC_1754	3	84	0.036	45	0.5	0.012455
VC_1276	1	49	0.02	44	0.9	0.0121782
VC_0394	3	117	0.026	43	0.4	0.0119015
VC_0567	2	20	0.1	43	2.1	0.0119015
VC_0488	2	48	0.042	40	0.8	0.0110711
VC_1304	1	60	0.017	40	0.7	0.0110711
VC_2364	3	89	0.034	40	0.4	0.0110711
VC_1232	1	33	0.03	39	1.2	0.0107944
VC_1704	2	90	0.022	39	0.4	0.0107944
VC_2082	3	36	0.083	39	1.1	0.0107944
VC_2129	3	17	0.176	39	2.3	0.0107944
VC_2370	1	72	0.014	39	0.5	0.0107944
VC_2438	2	102	0.02	39	0.4	0.0107944
VC_0535	3	100	0.03	38	0.4	0.0105176
VC_0941	2	54	0.037	38	0.7	0.0105176
VC_1653	2	200	0.01	37	0.2	0.0102408
IG_VC_2002	2	28	0.071	36	1.3	0.00996402
IG_VC_A0098	2	28	0.071	36	1.3	0.00996402
VC_0312	3	36	0.083	36	1	0.00996402
VC_2638	1	53	0.019	36	0.7	0.00996402
IG_VC_A0311	1	5	0.2	35	7	0.00968724
IG_VC_A0443	1	6	0.167	35	5.8	0.00968724
VC_1765	1	169	0.006	35	0.2	0.00968724
IG_VC_2287	1	17	0.059	34	2	0.00941046
VC_0342	1	41	0.024	34	0.8	0.00941046
VC_0420	17	146	0.116	34	0.2	0.00941046
VC_0623	1	55	0.018	34	0.6	0.00941046
VC_1205	1	44	0.023	34	0.8	0.00941046
VC_1343	1	44	0.023	34	0.8	0.00941046
VC_2641	2	46	0.043	34	0.7	0.00941046
VC_A0191	1	69	0.014	34	0.5	0.00941046
VC_A0855	1	32	0.031	34	1.1	0.00941046
VC_0156	3	123	0.024	33	0.3	0.00913368
VC_1782	1	51	0.02	33	0.6	0.00913368
VC_2535	10	59	0.169	33	0.6	0.00913368
IG_VC_2522	2	11	0.182	32	2.9	0.00885691
VC_0270	2	66	0.03	32	0.5	0.00885691
VC_0275	1	35	0.029	32	0.9	0.00885691
VC_2322	1	114	0.009	32	0.3	0.00885691
VC_2710	4	83	0.048	32	0.4	0.00885691
IG_VC_0160	1	26	0.038	31	1.2	0.00858013
IG_VC_0314	1	4	0.25	31	7.8	0.00858013
IG_VC_0388	1	4	0.25	31	7.8	0.00858013
VC_0059	1	7	0.143	31	4.4	0.00858013
VC_0122	2	105	0.019	31	0.3	0.00858013
VC_0710	2	25	0.08	31	1.2	0.00858013
VC_1758	2	75	0.027	31	0.4	0.00858013
VC_2162	1	57	0.018	31	0.5	0.00858013
VC_2336	2	15	0.133	31	2.1	0.00858013
VC_2496	1	6	0.167	31	5.2	0.00858013
VC_2520	2	33	0.061	31	0.9	0.00858013
VC_2644	2	39	0.051	31	0.8	0.00858013
VC_2753	1	7	0.143	31	4.4	0.00858013
VC_A0085	2	63	0.032	31	0.5	0.00858013	putative Permease of the major facilitator superfamily
VC_A1040	1	44	0.023	31	0.7	0.00858013
IG_VC_2409	1	1	1	29	29	0.00802657
IG_VC_A0327	1	9	0.111	29	3.2	0.00802657
IG_VC_A0444	1	6	0.167	29	4.8	0.00802657
IG_VC_A0448	1	20	0.05	29	1.4	0.00802657
VC_0026	1	39	0.026	29	0.7	0.00802657
VC_0067	2	72	0.028	29	0.4	0.00802657
VC_0112	2	44	0.045	29	0.7	0.00802657
VC_0414	3	209	0.014	29	0.1	0.00802657
VC_0462	2	38	0.053	29	0.8	0.00802657
VC_0948	2	50	0.04	29	0.6	0.00802657
VC_2424	1	69	0.014	29	0.4	0.00802657
VC_A0276	1	86	0.012	29	0.3	0.00802657
VC_A1088	1	59	0.017	29	0.5	0.00802657
IG_VC_0032	3	36	0.083	28	0.8	0.00774979
VC_0028	2	60	0.033	28	0.5	0.00774979
VC_0309	1	88	0.011	28	0.3	0.00774979
VC_0712	1	6	0.167	28	4.7	0.00774979
VC_0717	2	63	0.032	28	0.4	0.00774979
VC_1160	2	46	0.043	28	0.6	0.00774979
VC_1823	1	10	0.1	28	2.8	0.00774979
VC_1963	1	19	0.053	28	1.5	0.00774979
VC_2188	7	41	0.171	28	0.7	0.00774979
VC_2493	1	28	0.036	28	1	0.00774979
VC_2542	1	53	0.019	28	0.5	0.00774979
VC_2636	1	39	0.026	28	0.7	0.00774979
VC_2668	1	16	0.062	28	1.8	0.00774979
VC_A0161	3	74	0.041	28	0.4	0.00774979
VC_A0639	1	36	0.028	28	0.8	0.00774979
VC_A1015	1	60	0.017	28	0.5	0.00774979
VC_0127	1	28	0.036	27	1	0.00747301
VC_0311	1	15	0.067	27	1.8	0.00747301
VC_0421	4	34	0.118	27	0.8	0.00747301
VC_0502	1	39	0.026	27	0.7	0.00747301
VC_0533	1	64	0.016	27	0.4	0.00747301
VC_1399	1	55	0.018	27	0.5	0.00747301
VC_1416	2	158	0.013	27	0.2	0.00747301
VC_1451	4	589	0.007	27	0	0.00747301
VC_2132	5	29	0.172	27	0.9	0.00747301
VC_2562	3	93	0.032	27	0.3	0.00747301
VC_2713	2	52	0.038	27	0.5	0.00747301
VC_A0449	1	18	0.056	27	1.5	0.00747301
VC_A0549	2	21	0.095	27	1.3	0.00747301
VC_A0667	2	108	0.019	27	0.2	0.00747301
VC_A0798	1	21	0.048	27	1.3	0.00747301
VC_A0974	3	61	0.049	27	0.4	0.00747301
VC_A1063	1	89	0.011	27	0.3	0.00747301
IG_VC_0178	4	76	0.053	26	0.3	0.00719624
IG_VC_0756	1	18	0.056	26	1.4	0.00719624
VC_0170	2	61	0.033	26	0.4	0.00719624
VC_0304	9	68	0.132	26	0.4	0.00719624
VC_0321	7	79	0.089	26	0.3	0.00719624
VC_0512	2	108	0.019	26	0.2	0.00719624
VC_0522	1	30	0.033	26	0.9	0.00719624
VC_0775	1	62	0.016	26	0.4	0.00719624
VC_1212	1	102	0.01	26	0.3	0.00719624
VC_1727	2	53	0.038	26	0.5	0.00719624
VC_1990	1	69	0.014	26	0.4	0.00719624
VC_2451	2	82	0.024	26	0.3	0.00719624
VC_2744	8	71	0.113	26	0.4	0.00719624
VC_A0036	1	57	0.018	26	0.5	0.00719624
VC_A0516	1	75	0.013	26	0.3	0.00719624
VC_A0803	2	66	0.03	26	0.4	0.00719624
IG_VC_0731	2	24	0.083	25	1	0.00691946
IG_VC_A1057	2	30	0.067	25	0.8	0.00691946
VC_0099	1	40	0.025	25	0.6	0.00691946
VC_0116	2	70	0.029	25	0.4	0.00691946
VC_0178	4	78	0.051	25	0.3	0.00691946
VC_1174	1	63	0.016	25	0.4	0.00691946
VC_1353	2	133	0.015	25	0.2	0.00691946
VC_1401	1	46	0.022	25	0.5	0.00691946
VC_1425	1	58	0.017	25	0.4	0.00691946
VC_1866	2	118	0.017	25	0.2	0.00691946
VC_2100	1	37	0.027	25	0.7	0.00691946
VC_2239	2	13	0.154	25	1.9	0.00691946
VC_2417	4	52	0.077	25	0.5	0.00691946
VC_2711	1	66	0.015	25	0.4	0.00691946
VC_0075	1	44	0.023	24	0.5	0.00664268
VC_0078	2	24	0.083	24	1	0.00664268
VC_0195	1	35	0.029	24	0.7	0.00664268
VC_0494	1	41	0.024	24	0.6	0.00664268
VC_0998	10	165	0.061	24	0.1	0.00664268
VC_1152	2	47	0.043	24	0.5	0.00664268
VC_1552	1	51	0.02	24	0.5	0.00664268
VC_1854	2	85	0.024	24	0.3	0.00664268	Outer membrane porin-like protein OmpT
VC_1988	1	14	0.071	24	1.7	0.00664268
VC_2673	1	40	0.025	24	0.6	0.00664268
VC_2749	9	57	0.158	24	0.4	0.00664268
VC_A0165	2	101	0.02	24	0.2	0.00664268
VC_A0210	1	75	0.013	24	0.3	0.00664268
IG_VC_0538	2	30	0.067	23	0.8	0.0063659
VC_0018	1	25	0.04	23	0.9	0.0063659
VC_0412	1	49	0.02	23	0.5	0.0063659
VC_0476	2	62	0.032	23	0.4	0.0063659
VC_0795	2	69	0.029	23	0.3	0.0063659	cytS Citrate-sodium symporter
VC_0896	1	45	0.022	23	0.5	0.0063659
VC_1499	1	89	0.011	23	0.3	0.0063659
VC_2338	1	128	0.008	23	0.2	0.0063659
VC_2616	2	54	0.037	23	0.4	0.0063659
IG_VC_0068	2	11	0.182	22	2	0.00608912
IG_VC_2561	1	4	0.25	22	5.5	0.00608912
VC_0023	1	15	0.067	22	1.5	0.00608912
VC_0068	2	53	0.038	22	0.4	0.00608912
VC_0190	1	72	0.014	22	0.3	0.00608912
VC_0362	5	77	0.065	22	0.3	0.00608912
VC_0391	1	56	0.018	22	0.4	0.00608912
VC_0399	2	62	0.032	22	0.4	0.00608912
VC_0676	1	58	0.017	22	0.4	0.00608912
VC_0703	10	115	0.087	22	0.2	0.00608912	Biofilm architecture maintenance protein mbaA
VC_1117	1	37	0.027	22	0.6	0.00608912
VC_2191	10	78	0.128	22	0.3	0.00608912
VC_2232	1	62	0.016	22	0.4	0.00608912
VC_2705	2	82	0.024	22	0.3	0.00608912
VC_2716	2	71	0.028	22	0.3	0.00608912
VC_A0193	1	47	0.021	22	0.5	0.00608912
VC_A0779	1	48	0.021	22	0.5	0.00608912
IG_VC_0972	2	48	0.042	21	0.4	0.00581234
VC_0330	1	25	0.04	21	0.8	0.00581234
VC_0492	2	90	0.022	21	0.2	0.00581234
VC_0722	2	57	0.035	21	0.4	0.00581234
VC_0840	1	165	0.006	21	0.1	0.00581234
VC_0880	1	76	0.013	21	0.3	0.00581234
VC_1798	2	63	0.032	21	0.3	0.00581234
VC_2072	10	133	0.075	21	0.2	0.00581234
VC_2236	1	29	0.034	21	0.7	0.00581234
VC_2348	1	54	0.019	21	0.4	0.00581234
VC_2552	1	22	0.045	21	1	0.00581234
VC_A0148	2	169	0.012	21	0.1	0.00581234
IG_VC_0477	2	8	0.25	20	2.5	0.00553557
IG_VC_0644	1	6	0.167	20	3.3	0.00553557
IG_VC_0896	1	13	0.077	20	1.5	0.00553557
IG_VC_2142	1	8	0.125	20	2.5	0.00553557
IG_VC_2440	1	32	0.031	20	0.6	0.00553557
VC_0048	3	52	0.058	20	0.4	0.00553557
VC_0230	1	39	0.026	20	0.5	0.00553557
VC_0404	2	45	0.044	20	0.4	0.00553557
VC_0720	1	50	0.02	20	0.4	0.00553557
VC_1112	1	39	0.026	20	0.5	0.00553557
VC_1973	1	25	0.04	20	0.8	0.00553557
VC_2031	2	70	0.029	20	0.3	0.00553557
VC_2344	9	110	0.082	20	0.2	0.00553557
VC_2758	1	74	0.014	20	0.3	0.00553557
IG_VC_0151	1	16	0.062	19	1.2	0.00525879
IG_VC_0343	1	7	0.143	19	2.7	0.00525879
IG_VC_0429	1	8	0.125	19	2.4	0.00525879
IG_VC_0449	1	60	0.017	19	0.3	0.00525879
IG_VC_0674	1	4	0.25	19	4.8	0.00525879
IG_VC_0802	1	30	0.033	19	0.6	0.00525879
IG_VC_0810	1	16	0.062	19	1.2	0.00525879
IG_VC_0894	1	16	0.062	19	1.2	0.00525879
IG_VC_1101	1	38	0.026	19	0.5	0.00525879
IG_VC_1299	1	35	0.029	19	0.5	0.00525879
IG_VC_1572	1	36	0.028	19	0.5	0.00525879
IG_VC_1624	1	18	0.056	19	1.1	0.00525879
IG_VC_2115	1	4	0.25	19	4.8	0.00525879
IG_VC_2175	1	39	0.026	19	0.5	0.00525879
IG_VC_2264	1	6	0.167	19	3.2	0.00525879
IG_VC_A0044	1	17	0.059	19	1.1	0.00525879
IG_VC_A0142	1	18	0.056	19	1.1	0.00525879
IG_VC_A0523	1	18	0.056	19	1.1	0.00525879
IG_VC_A0925	1	20	0.05	19	0.9	0.00525879
VC_0159	1	18	0.056	19	1.1	0.00525879
VC_0729	1	5	0.2	19	3.8	0.00525879
VC_0779	1	30	0.033	19	0.6	0.00525879
VC_0914	2	142	0.014	19	0.1	0.00525879
VC_0930	2	158	0.013	19	0.1	0.00525879	rbmC
VC_1009	2	24	0.083	19	0.8	0.00525879
VC_1294	1	11	0.091	19	1.7	0.00525879
VC_1865	1	61	0.016	19	0.3	0.00525879
VC_2197	10	74	0.135	19	0.3	0.00525879
VC_2564	1	60	0.017	19	0.3	0.00525879
VC_2608	1	69	0.014	19	0.3	0.00525879
VC_A0254	1	76	0.013	19	0.2	0.00525879
VC_A0687	1	55	0.018	19	0.3	0.00525879
VC_A0975	2	91	0.022	19	0.2	0.00525879
IG_VC_0513	1	146	0.007	18	0.1	0.00498201
IG_VC_A0298	1	11	0.091	18	1.6	0.00498201
IG_VC_A0303	1	7	0.143	18	2.6	0.00498201
IG_VC_A0305	1	12	0.083	18	1.5	0.00498201
IG_VC_A0310	1	6	0.167	18	3	0.00498201
IG_VC_A0320	1	8	0.125	18	2.2	0.00498201
IG_VC_A0328	1	14	0.071	18	1.3	0.00498201
IG_VC_A0337	1	10	0.1	18	1.8	0.00498201
IG_VC_A0348	1	5	0.2	18	3.6	0.00498201
IG_VC_A0350	1	7	0.143	18	2.6	0.00498201
IG_VC_A0363	1	8	0.125	18	2.2	0.00498201
IG_VC_A0364	1	13	0.077	18	1.4	0.00498201
IG_VC_A0379	1	9	0.111	18	2	0.00498201
IG_VC_A0385	1	8	0.125	18	2.2	0.00498201
IG_VC_A0400	1	5	0.2	18	3.6	0.00498201
IG_VC_A0409	1	10	0.1	18	1.8	0.00498201
IG_VC_A0416	1	6	0.167	18	3	0.00498201
IG_VC_A0421	1	15	0.067	18	1.2	0.00498201
IG_VC_A0432	1	9	0.111	18	2	0.00498201
IG_VC_A0436	1	10	0.1	18	1.8	0.00498201
IG_VC_A0440	1	9	0.111	18	2	0.00498201
IG_VC_A0441	1	4	0.25	18	4.5	0.00498201
IG_VC_A0455	1	20	0.05	18	0.9	0.00498201
IG_VC_A0456	1	11	0.091	18	1.6	0.00498201
IG_VC_A0457	1	21	0.048	18	0.9	0.00498201
IG_VC_A0460	1	7	0.143	18	2.6	0.00498201
IG_VC_A0468	1	12	0.083	18	1.5	0.00498201
IG_VC_A0470	1	5	0.2	18	3.6	0.00498201
IG_VC_A0471	1	12	0.083	18	1.5	0.00498201
IG_VC_A0483	1	11	0.091	18	1.6	0.00498201
IG_VC_A0484	1	10	0.1	18	1.8	0.00498201
IG_VC_A0497	1	15	0.067	18	1.2	0.00498201
IG_VC_A0507	1	31	0.032	18	0.6	0.00498201
VC_0003	7	51	0.137	18	0.4	0.00498201
VC_0046	4	22	0.182	18	0.8	0.00498201
VC_0177	1	34	0.029	18	0.5	0.00498201
VC_0241	3	107	0.028	18	0.2	0.00498201
VC_0499	1	46	0.022	18	0.4	0.00498201
VC_0892	2	28	0.071	18	0.6	0.00498201
VC_1071	1	46	0.022	18	0.4	0.00498201
VC_1184	2	47	0.043	18	0.4	0.00498201
VC_1570	1	42	0.024	18	0.4	0.00498201
VC_1700	2	27	0.074	18	0.7	0.00498201
VC_2068	9	58	0.155	18	0.3	0.00498201
VC_2635	1	106	0.009	18	0.2	0.00498201
VC_2681	3	50	0.06	18	0.4	0.00498201
VC_A0354	1	40	0.025	18	0.5	0.00498201
VC_A0399	1	67	0.015	18	0.3	0.00498201
VC_A0431	1	16	0.062	18	1.1	0.00498201
VC_A0474	1	47	0.021	18	0.4	0.00498201
VC_A0491	1	38	0.026	18	0.5	0.00498201
VC_A0505	1	41	0.024	18	0.4	0.00498201
VC_A0828	1	45	0.022	18	0.4	0.00498201
VC_A0829	1	73	0.014	18	0.2	0.00498201
IG_VC_0601	1	5	0.2	17	3.4	0.00470523
IG_VC_0650	1	9	0.111	17	1.9	0.00470523
IG_VC_0965	1	12	0.083	17	1.4	0.00470523
IG_VC_1140	1	15	0.067	17	1.1	0.00470523
IG_VC_A0023	1	9	0.111	17	1.9	0.00470523
IG_VC_A0140	1	28	0.036	17	0.6	0.00470523
VC_0019	1	51	0.02	17	0.3	0.00470523
VC_0050	2	27	0.074	17	0.6	0.00470523
VC_0216	1	69	0.014	17	0.2	0.00470523
VC_0225	2	42	0.048	17	0.4	0.00470523
VC_0269	3	77	0.039	17	0.2	0.00470523
VC_0475	1	100	0.01	17	0.2	0.00470523
VC_1102	1	39	0.026	17	0.4	0.00470523
VC_1211	1	101	0.01	17	0.2	0.00470523
VC_2161	2	83	0.024	17	0.2	0.00470523
VC_2207	4	32	0.125	17	0.5	0.00470523
VC_2435	1	25	0.04	17	0.7	0.00470523
VC_2488	1	33	0.03	17	0.5	0.00470523
VC_2529	2	61	0.033	17	0.3	0.00470523
VC_2692	1	23	0.043	17	0.7	0.00470523	cpxR
VC_A0157	2	122	0.016	17	0.1	0.00470523
VC_A0631	3	24	0.125	17	0.7	0.00470523
VC_A0813	1	65	0.015	17	0.3	0.00470523
IG_VC_0106	1	7	0.143	16	2.3	0.00442845
IG_VC_1758	1	53	0.019	16	0.3	0.00442845
IG_VC_1901	2	52	0.038	16	0.3	0.00442845
VC_0349	1	51	0.02	16	0.3	0.00442845
VC_0473	1	70	0.014	16	0.2	0.00442845
VC_0539	2	34	0.059	16	0.5	0.00442845
VC_0728	2	30	0.067	16	0.5	0.00442845
VC_0958	1	75	0.013	16	0.2	0.00442845
VC_1131	1	76	0.013	16	0.2	0.00442845
VC_1182	1	40	0.025	16	0.4	0.00442845
VC_1934	1	110	0.009	16	0.1	0.00442845
VC_2028	2	37	0.054	16	0.4	0.00442845
VC_2133	11	65	0.169	16	0.2	0.00442845
VC_2202	1	51	0.02	16	0.3	0.00442845
VC_2209	2	271	0.007	16	0.1	0.00442845
VC_2215	2	102	0.02	16	0.2	0.00442845
VC_2229	1	26	0.038	16	0.6	0.00442845
VC_2345	1	41	0.024	16	0.4	0.00442845
VC_2775	5	71	0.07	16	0.2	0.00442845
VC_A0850	1	34	0.029	16	0.5	0.00442845
VC_0081	1	34	0.029	15	0.4	0.00415167
VC_0278	1	65	0.015	15	0.2	0.00415167
VC_0371	1	53	0.019	15	0.3	0.00415167
VC_0398	2	98	0.02	15	0.2	0.00415167
VC_0431	1	29	0.034	15	0.5	0.00415167
VC_0991	1	81	0.012	15	0.2	0.00415167
VC_1087	1	75	0.013	15	0.2	0.00415167
VC_1313	1	65	0.015	15	0.2	0.00415167
VC_1722	2	32	0.062	15	0.5	0.00415167
VC_1861	2	42	0.048	15	0.4	0.00415167
VC_2036	1	43	0.023	15	0.3	0.00415167
VC_2043	1	89	0.011	15	0.2	0.00415167
VC_2069	8	86	0.093	15	0.2	0.00415167
VC_2156	6	45	0.133	15	0.3	0.00415167
VC_2262	12	111	0.108	15	0.1	0.00415167
VC_2319	1	77	0.013	15	0.2	0.00415167
VC_2423	3	36	0.083	15	0.4	0.00415167
VC_2483	1	80	0.013	15	0.2	0.00415167
VC_A0700	2	142	0.014	15	0.1	0.00415167
VC_A0914	2	45	0.044	15	0.3	0.00415167
VC_A1023	1	101	0.01	15	0.1	0.00415167
VC_A1039	1	28	0.036	15	0.5	0.00415167
VC_A1105	2	34	0.059	15	0.4	0.00415167
IG_VC_0099	2	16	0.125	14	0.9	0.0038749
IG_VC_0269	1	29	0.034	14	0.5	0.0038749
IG_VC_2673	1	4	0.25	14	3.5	0.0038749
IG_VC_A1006	1	8	0.125	14	1.8	0.0038749
VC_0113	1	34	0.029	14	0.4	0.0038749
VC_0130	3	87	0.034	14	0.2	0.0038749
VC_0180	3	123	0.024	14	0.1	0.0038749
VC_0242	6	109	0.055	14	0.1	0.0038749
VC_0423	1	49	0.02	14	0.3	0.0038749
VC_1260	1	45	0.022	14	0.3	0.0038749
VC_1321	1	173	0.006	14	0.1	0.0038749
VC_1539	1	41	0.024	14	0.3	0.0038749
VC_1764	1	113	0.009	14	0.1	0.0038749
VC_1777	1	78	0.013	14	0.2	0.0038749
VC_1976	1	47	0.021	14	0.3	0.0038749
VC_2033	1	128	0.008	14	0.1	0.0038749
VC_2163	1	12	0.083	14	1.2	0.0038749
VC_2222	1	24	0.042	14	0.6	0.0038749
VC_2283	1	55	0.018	14	0.3	0.0038749
VC_A0325	2	14	0.143	14	1	0.0038749
VC_A0375	2	14	0.143	14	1	0.0038749
VC_A0781	1	92	0.011	14	0.2	0.0038749
VC_A0960	1	86	0.012	14	0.2	0.0038749
VC_A1062	1	59	0.017	14	0.2	0.0038749
IG_VC_0912	1	25	0.04	13	0.5	0.00359812
IG_VC_A0533	1	20	0.05	13	0.7	0.00359812
VC_0040	1	38	0.026	13	0.3	0.00359812
VC_0074	1	12	0.083	13	1.1	0.00359812
VC_0157	1	92	0.011	13	0.1	0.00359812
VC_0171	2	68	0.029	13	0.2	0.00359812
VC_0464	1	28	0.036	13	0.5	0.00359812
VC_0603	1	100	0.01	13	0.1	0.00359812
VC_0630	2	77	0.026	13	0.2	0.00359812
VC_0778	1	43	0.023	13	0.3	0.00359812
VC_0884	1	32	0.031	13	0.4	0.00359812
VC_1494	1	119	0.008	13	0.1	0.00359812
VC_1689	1	22	0.045	13	0.6	0.00359812
VC_2214	1	62	0.016	13	0.2	0.00359812
VC_2227	1	28	0.036	13	0.5	0.00359812
VC_2349	1	52	0.019	13	0.2	0.00359812
VC_2534	3	43	0.07	13	0.3	0.00359812
VC_2557	1	25	0.04	13	0.5	0.00359812
VC_2598	1	31	0.032	13	0.4	0.00359812
VC_2637	1	42	0.024	13	0.3	0.00359812
VC_2699	2	50	0.04	13	0.3	0.00359812
VC_A0211	1	90	0.011	13	0.1	0.00359812
VC_A0607	1	16	0.062	13	0.8	0.00359812
VC_A0681	2	55	0.036	13	0.2	0.00359812
IG_VC_2261	1	20	0.05	12	0.6	0.00332134
IG_VC_2269	1	13	0.077	12	0.9	0.00332134
IG_VC_A0449	1	5	0.2	12	2.4	0.00332134
IG_VC_A0895	1	5	0.2	12	2.4	0.00332134
IG_VC_A0919	1	37	0.027	12	0.3	0.00332134
VC_0425	1	27	0.037	12	0.4	0.00332134
VC_0556	3	65	0.046	12	0.2	0.00332134
VC_0632	2	87	0.023	12	0.1	0.00332134
VC_0674	1	45	0.022	12	0.3	0.00332134
VC_0899	1	67	0.015	12	0.2	0.00332134
VC_1033	1	83	0.012	12	0.1	0.00332134
VC_1388	1	31	0.032	12	0.4	0.00332134
VC_1391	1	56	0.018	12	0.2	0.00332134
VC_2140	6	63	0.095	12	0.2	0.00332134
VC_2350	1	33	0.03	12	0.4	0.00332134
VC_2356	1	69	0.014	12	0.2	0.00332134
VC_2441	1	27	0.037	12	0.4	0.00332134
VC_2536	2	16	0.125	12	0.8	0.00332134
VC_2627	7	59	0.119	12	0.2	0.00332134
VC_A0100	1	19	0.053	12	0.6	0.00332134
VC_A0146	1	78	0.013	12	0.2	0.00332134
VC_A0311	2	21	0.095	12	0.6	0.00332134
VC_A0385	2	21	0.095	12	0.6	0.00332134
VC_A0511	1	100	0.01	12	0.1	0.00332134
VC_A0576	1	182	0.005	12	0.1	0.00332134
VC_A0795	1	72	0.014	12	0.2	0.00332134
VC_A0863	2	122	0.016	12	0.1	0.00332134
VC_A1034	1	77	0.013	12	0.2	0.00332134
IG_VC_1334	1	11	0.091	11	1	0.00304456
IG_VC_2200	1	1	1	11	11	0.00304456
IG_VC_2640	1	7	0.143	11	1.6	0.00304456
IG_VC_2773	1	3	0.333	11	3.7	0.00304456
VC_0041	2	21	0.095	11	0.5	0.00304456
VC_0132	2	63	0.032	11	0.2	0.00304456
VC_0179	2	78	0.026	11	0.1	0.00304456
VC_0243	3	97	0.031	11	0.1	0.00304456
VC_0252	1	43	0.023	11	0.3	0.00304456
VC_0254	1	64	0.016	11	0.2	0.00304456
VC_0257	2	59	0.034	11	0.2	0.00304456
VC_0302	2	45	0.044	11	0.2	0.00304456
VC_0409	1	41	0.024	11	0.3	0.00304456
VC_0422	5	57	0.088	11	0.2	0.00304456
VC_0677	1	50	0.02	11	0.2	0.00304456
VC_0744	1	38	0.026	11	0.3	0.00304456
VC_0783	2	92	0.022	11	0.1	0.00304456
VC_0995	1	73	0.014	11	0.2	0.00304456
VC_1164	2	27	0.074	11	0.4	0.00304456
VC_1478	2	59	0.034	11	0.2	0.00304456
VC_1789	2	59	0.034	11	0.2	0.00304456
VC_1799	1	72	0.014	11	0.2	0.00304456
VC_2194	3	35	0.086	11	0.3	0.00304456
VC_2554	2	53	0.038	11	0.2	0.00304456
VC_2579	1	30	0.033	11	0.4	0.00304456
VC_2593	1	45	0.022	11	0.2	0.00304456
VC_2694	1	35	0.029	11	0.3	0.00304456
VC_A0247	1	33	0.03	11	0.3	0.00304456
VC_A0371	2	59	0.034	11	0.2	0.00304456
VC_A0508	2	59	0.034	11	0.2	0.00304456
VC_A0628	1	201	0.005	11	0.1	0.00304456
VC_A0791	2	59	0.034	11	0.2	0.00304456
VC_A0872	1	81	0.012	11	0.1	0.00304456
VC_A1027	1	45	0.022	11	0.2	0.00304456
IG_VC_0298	2	21	0.095	10	0.5	0.00276778
IG_VC_0620	1	8	0.125	10	1.2	0.00276778
IG_VC_0688	1	17	0.059	10	0.6	0.00276778
IG_VC_1182	1	12	0.083	10	0.8	0.00276778
IG_VC_1622	1	1	1	10	10	0.00276778
IG_VC_1776	1	15	0.067	10	0.7	0.00276778
IG_VC_2184	2	8	0.25	10	1.2	0.00276778
IG_VC_2507	1	23	0.043	10	0.4	0.00276778
VC_0154	1	47	0.021	10	0.2	0.00276778
VC_0396	1	34	0.029	10	0.3	0.00276778
VC_0403	1	27	0.037	10	0.4	0.00276778
VC_0441	1	40	0.025	10	0.2	0.00276778
VC_0534	1	35	0.029	10	0.3	0.00276778
VC_0619	2	49	0.041	10	0.2	0.00276778
VC_0667	1	53	0.019	10	0.2	0.00276778
VC_0697	1	25	0.04	10	0.4	0.00276778
VC_1067	8	127	0.063	10	0.1	0.00276778
VC_1085	1	58	0.017	10	0.2	0.00276778
VC_1279	1	78	0.013	10	0.1	0.00276778
VC_1392	1	52	0.019	10	0.2	0.00276778
VC_1492	2	219	0.009	10	0	0.00276778
VC_1521	1	81	0.012	10	0.1	0.00276778
VC_1605	1	69	0.014	10	0.1	0.00276778
VC_1650	1	137	0.007	10	0.1	0.00276778
VC_1721	1	50	0.02	10	0.2	0.00276778
VC_1749	1	71	0.014	10	0.1	0.00276778
VC_2006	1	57	0.018	10	0.2	0.00276778
VC_2120	5	38	0.132	10	0.3	0.00276778
VC_2134	3	13	0.231	10	0.8	0.00276778
VC_2341	1	86	0.012	10	0.1	0.00276778
VC_2346	1	32	0.031	10	0.3	0.00276778
VC_2490	1	77	0.013	10	0.1	0.00276778
VC_2621	1	108	0.009	10	0.1	0.00276778
VC_A0030	1	41	0.024	10	0.2	0.00276778
VC_A0243	1	28	0.036	10	0.4	0.00276778
VC_A0396	1	59	0.017	10	0.2	0.00276778
VC_A0454	1	83	0.012	10	0.1	0.00276778
VC_A0552	1	104	0.01	10	0.1	0.00276778
VC_A0756	1	47	0.021	10	0.2	0.00276778
VC_A1112	2	88	0.023	10	0.1	0.00276778
IG_VC_0101	1	6	0.167	9	1.5	0.002491
IG_VC_0387	1	12	0.083	9	0.8	0.002491
IG_VC_0424	1	47	0.021	9	0.2	0.002491
IG_VC_0430	2	13	0.154	9	0.7	0.002491
IG_VC_1944	1	17	0.059	9	0.5	0.002491
IG_VC_2735	1	17	0.059	9	0.5	0.002491
VC_0058	1	30	0.033	9	0.3	0.002491
VC_0095	1	32	0.031	9	0.3	0.002491
VC_0185	1	90	0.011	9	0.1	0.002491
VC_0206	1	33	0.03	9	0.3	0.002491
VC_0274	4	37	0.108	9	0.2	0.002491
VC_0281	1	86	0.012	9	0.1	0.002491
VC_0284	1	88	0.011	9	0.1	0.002491	pseudogene
VC_0390	2	157	0.013	9	0.1	0.002491
VC_0582	1	46	0.022	9	0.2	0.002491
VC_0653	6	81	0.074	9	0.1	0.002491
VC_0841	1	54	0.019	9	0.2	0.002491
VC_0843	1	75	0.013	9	0.1	0.002491
VC_0900	6	70	0.086	9	0.1	0.002491
VC_1074	1	38	0.026	9	0.2	0.002491
VC_1091	1	69	0.014	9	0.1	0.002491
VC_1214	2	71	0.028	9	0.1	0.002491
VC_1284	1	56	0.018	9	0.2	0.002491
VC_1295	2	64	0.031	9	0.1	0.002491
VC_1307	1	42	0.024	9	0.2	0.002491
VC_1428	4	52	0.077	9	0.2	0.002491
VC_1448	1	106	0.009	9	0.1	0.002491
VC_1563	1	43	0.023	9	0.2	0.002491
VC_1590	1	81	0.012	9	0.1	0.002491
VC_1719	1	31	0.032	9	0.3	0.002491
VC_1771	1	246	0.004	9	0	0.002491
VC_1859	1	72	0.014	9	0.1	0.002491
VC_1936	1	55	0.018	9	0.2	0.002491
VC_2062	5	53	0.094	9	0.2	0.002491
VC_2333	1	48	0.021	9	0.2	0.002491
VC_2434	1	19	0.053	9	0.5	0.002491
VC_2618	1	44	0.023	9	0.2	0.002491
VC_2748	2	38	0.053	9	0.2	0.002491
VC_A0119	1	38	0.026	9	0.2	0.002491
VC_A0239	1	33	0.03	9	0.3	0.002491
VC_A0331	1	59	0.017	9	0.2	0.002491
VC_A0473	1	25	0.04	9	0.4	0.002491
VC_A0653	1	58	0.017	9	0.2	0.002491
VC_A0665	1	79	0.013	9	0.1	0.002491
VC_A0856	1	33	0.03	9	0.3	0.002491
VC_A1077	1	72	0.014	9	0.1	0.002491
IG_VC_2715	1	11	0.091	8	0.7	0.00221423
IG_VC_A0178	1	17	0.059	8	0.5	0.00221423
IG_VC_A0805	1	21	0.048	8	0.4	0.00221423
IG_VC_A0971	1	32	0.031	8	0.2	0.00221423
IG_chrm1end	1	6	0.167	8	1.3	0.00221423
VC_0071	1	23	0.043	8	0.3	0.00221423
VC_0076	2	15	0.133	8	0.5	0.00221423
VC_0128	1	38	0.026	8	0.2	0.00221423
VC_0135	3	55	0.055	8	0.1	0.00221423
VC_0251	4	162	0.025	8	0	0.00221423
VC_0287	1	11	0.091	8	0.7	0.00221423
VC_0305	5	53	0.094	8	0.2	0.00221423
VC_0338	1	56	0.018	8	0.1	0.00221423
VC_0379	1	36	0.028	8	0.2	0.00221423
VC_0743	1	89	0.011	8	0.1	0.00221423
VC_0798	1	21	0.048	8	0.4	0.00221423
VC_1207	1	52	0.019	8	0.2	0.00221423
VC_1289	1	75	0.013	8	0.1	0.00221423
VC_1360	1	60	0.017	8	0.1	0.00221423
VC_1398	1	22	0.045	8	0.4	0.00221423	cheY2 Response regulator receiver
VC_1433	1	43	0.023	8	0.2	0.00221423
VC_1454	1	56	0.018	8	0.1	0.00221423
VC_1463	1	56	0.018	8	0.1	0.00221423
VC_1663	1	13	0.077	8	0.6	0.00221423
VC_1824	1	31	0.032	8	0.3	0.00221423
VC_1951	1	48	0.021	8	0.2	0.00221423
VC_1998	1	22	0.045	8	0.4	0.00221423
VC_2014	1	28	0.036	8	0.3	0.00221423
VC_2137	4	54	0.074	8	0.1	0.00221423
VC_2179	1	38	0.026	8	0.2	0.00221423
VC_2195	3	33	0.091	8	0.2	0.00221423
VC_2208	5	51	0.098	8	0.2	0.00221423
VC_2257	1	18	0.056	8	0.4	0.00221423
VC_2312	3	42	0.071	8	0.2	0.00221423
VC_2432	1	26	0.038	8	0.3	0.00221423
VC_2501	1	65	0.015	8	0.1	0.00221423
VC_2718	1	28	0.036	8	0.3	0.00221423
VC_A0063	1	85	0.012	8	0.1	0.00221423
VC_A0108	1	52	0.019	8	0.2	0.00221423
VC_A0120	1	147	0.007	8	0.1	0.00221423
VC_A0141	1	66	0.015	8	0.1	0.00221423
VC_A0382	1	21	0.048	8	0.4	0.00221423
VC_A0519	2	37	0.054	8	0.2	0.00221423
VC_A0522	1	115	0.009	8	0.1	0.00221423
VC_A0575	1	41	0.024	8	0.2	0.00221423
VC_A0646	1	73	0.014	8	0.1	0.00221423
VC_A0669	1	69	0.014	8	0.1	0.00221423
VC_A0688	2	72	0.028	8	0.1	0.00221423
VC_A0865	1	94	0.011	8	0.1	0.00221423
VC_A0896	2	63	0.032	8	0.1	0.00221423
VC_A0980	1	40	0.025	8	0.2	0.00221423
IG_VC_0047	1	4	0.25	7	1.8	0.00193745
IG_VC_0056	1	3	0.333	7	2.3	0.00193745
IG_VC_0374	1	20	0.05	7	0.3	0.00193745
IG_VC_0548	1	7	0.143	7	1	0.00193745
IG_VC_1973	1	5	0.2	7	1.4	0.00193745
IG_VC_2378	1	11	0.091	7	0.6	0.00193745
IG_VC_2642	1	13	0.077	7	0.5	0.00193745
IG_VC_A0506	1	7	0.143	7	1	0.00193745
VC_0054	1	23	0.043	7	0.3	0.00193745
VC_0207	1	51	0.02	7	0.1	0.00193745
VC_0264	1	41	0.024	7	0.2	0.00193745
VC_0430	5	49	0.102	7	0.1	0.00193745
VC_0498	1	20	0.05	7	0.3	0.00193745
VC_0612	3	98	0.031	7	0.1	0.00193745
VC_0616	1	37	0.027	7	0.2	0.00193745
VC_0806	1	56	0.018	7	0.1	0.00193745
VC_0835	1	120	0.008	7	0.1	0.00193745
VC_0863	1	68	0.015	7	0.1	0.00193745
VC_0901	1	131	0.008	7	0.1	0.00193745
VC_0904	1	28	0.036	7	0.2	0.00193745
VC_1265	1	50	0.02	7	0.1	0.00193745
VC_1495	1	40	0.025	7	0.2	0.00193745
VC_1815	1	27	0.037	7	0.3	0.00193745
VC_1845	1	47	0.021	7	0.1	0.00193745
VC_1863	1	44	0.023	7	0.2	0.00193745
VC_1902	1	26	0.038	7	0.3	0.00193745
VC_1919	1	13	0.077	7	0.5	0.00193745
VC_1923	1	41	0.024	7	0.2	0.00193745
VC_1924	1	16	0.062	7	0.4	0.00193745
VC_1927	1	60	0.017	7	0.1	0.00193745
VC_2128	4	58	0.069	7	0.1	0.00193745
VC_2131	3	25	0.12	7	0.3	0.00193745
VC_2199	4	23	0.174	7	0.3	0.00193745
VC_2316	1	48	0.021	7	0.1	0.00193745
VC_2384	1	33	0.03	7	0.2	0.00193745
VC_2476	1	20	0.05	7	0.3	0.00193745
VC_2756	3	68	0.044	7	0.1	0.00193745
VC_A0014	1	76	0.013	7	0.1	0.00193745
VC_A0530	1	130	0.008	7	0.1	0.00193745
VC_A0759	1	31	0.032	7	0.2	0.00193745
VC_A0808	1	25	0.04	7	0.3	0.00193745
VC_A0830	1	41	0.024	7	0.2	0.00193745
VC_A1046	1	45	0.022	7	0.2	0.00193745
IG_VC_0280	1	10	0.1	6	0.6	0.00166067
IG_VC_0917	1	31	0.032	6	0.2	0.00166067
IG_VC_0998	1	7	0.143	6	0.9	0.00166067
IG_VC_1210	1	12	0.083	6	0.5	0.00166067
IG_VC_2323	1	14	0.071	6	0.4	0.00166067
IG_VC_2622	1	15	0.067	6	0.4	0.00166067
IG_VC_2670	1	16	0.062	6	0.4	0.00166067
IG_VC_2758	1	13	0.077	6	0.5	0.00166067
IG_VC_A0022	1	7	0.143	6	0.9	0.00166067
IG_VC_A0477	1	10	0.1	6	0.6	0.00166067
IG_VC_A0832	1	21	0.048	6	0.3	0.00166067
VC_0186	2	45	0.044	6	0.1	0.00166067
VC_0308	1	43	0.023	6	0.1	0.00166067
VC_0602	1	90	0.011	6	0.1	0.00166067
VC_0609	1	97	0.01	6	0.1	0.00166067
VC_0687	1	66	0.015	6	0.1	0.00166067
VC_0690	1	30	0.033	6	0.2	0.00166067
VC_0788	1	15	0.067	6	0.4	0.00166067
VC_0810	1	42	0.024	6	0.1	0.00166067
VC_0965	4	78	0.051	6	0.1	0.00166067
VC_1004	1	71	0.014	6	0.1	0.00166067
VC_1020	1	12	0.083	6	0.5	0.00166067
VC_1053	1	20	0.05	6	0.3	0.00166067
VC_1088	2	82	0.024	6	0.1	0.00166067
VC_1097	4	87	0.046	6	0.1	0.00166067
VC_1219	1	40	0.025	6	0.1	0.00166067
VC_1244	1	39	0.026	6	0.2	0.00166067
VC_1267	1	42	0.024	6	0.1	0.00166067
VC_1345	1	37	0.027	6	0.2	0.00166067
VC_1684	2	27	0.074	6	0.2	0.00166067
VC_1693	1	34	0.029	6	0.2	0.00166067
VC_1879	2	111	0.018	6	0.1	0.00166067
VC_1903	3	119	0.025	6	0.1	0.00166067
VC_1983	1	77	0.013	6	0.1	0.00166067
VC_2030	1	121	0.008	6	0	0.00166067
VC_2059	4	24	0.167	6	0.2	0.00166067
VC_2063	3	112	0.027	6	0.1	0.00166067
VC_2118	1	31	0.032	6	0.2	0.00166067
VC_2130	5	45	0.111	6	0.1	0.00166067
VC_2171	2	45	0.044	6	0.1	0.00166067
VC_2190	6	60	0.1	6	0.1	0.00166067
VC_2302	1	31	0.032	6	0.2	0.00166067
VC_2464	1	20	0.05	6	0.3	0.00166067
VC_2603	1	29	0.034	6	0.2	0.00166067
VC_2693	1	55	0.018	6	0.1	0.00166067	Sensor protein CpxA
VC_2700	1	149	0.007	6	0	0.00166067
VC_A0008	1	79	0.013	6	0.1	0.00166067
VC_A0027	1	111	0.009	6	0.1	0.00166067
VC_A0159	1	46	0.022	6	0.1	0.00166067
VC_A0213	1	69	0.014	6	0.1	0.00166067
VC_A0560	2	73	0.027	6	0.1	0.00166067
VC_A0580	1	32	0.031	6	0.2	0.00166067
VC_A0644	1	68	0.015	6	0.1	0.00166067
VC_A0904	1	65	0.015	6	0.1	0.00166067
VC_A1055	1	44	0.023	6	0.1	0.00166067
VC_A1073	1	105	0.01	6	0.1	0.00166067
VC_A1091	1	37	0.027	6	0.2	0.00166067
IG_VC_0059	1	21	0.048	5	0.2	0.00138389
IG_VC_0071	1	8	0.125	5	0.6	0.00138389
IG_VC_1034	2	31	0.065	5	0.2	0.00138389
IG_VC_1069	1	6	0.167	5	0.8	0.00138389
IG_VC_2070	1	20	0.05	5	0.2	0.00138389
IG_VC_2357	1	28	0.036	5	0.2	0.00138389
IG_VC_A0287	1	21	0.048	5	0.2	0.00138389
VC_0063	1	38	0.026	5	0.1	0.00138389
VC_0066	1	54	0.019	5	0.1	0.00138389
VC_0082	1	56	0.018	5	0.1	0.00138389
VC_0114	1	17	0.059	5	0.3	0.00138389
VC_0173	1	39	0.026	5	0.1	0.00138389
VC_0183	1	152	0.007	5	0	0.00138389
VC_0260	3	114	0.026	5	0	0.00138389
VC_0628	1	39	0.026	5	0.1	0.00138389
VC_0700	1	103	0.01	5	0	0.00138389
VC_0704	1	60	0.017	5	0.1	0.00138389	nspS (norspermidine sensor)
VC_0857	1	29	0.034	5	0.2	0.00138389
VC_0962	1	54	0.019	5	0.1	0.00138389
VC_0988	1	82	0.012	5	0.1	0.00138389
VC_1006	1	33	0.03	5	0.2	0.00138389
VC_1133	1	49	0.02	5	0.1	0.00138389
VC_1271	1	36	0.028	5	0.1	0.00138389
VC_1625	1	111	0.009	5	0	0.00138389
VC_1768	2	86	0.023	5	0.1	0.00138389
VC_1871	1	22	0.045	5	0.2	0.00138389
VC_1896	2	85	0.024	5	0.1	0.00138389
VC_1905	1	73	0.014	5	0.1	0.00138389
VC_2123	2	35	0.057	5	0.1	0.00138389
VC_2138	3	22	0.136	5	0.2	0.00138389
VC_2192	4	34	0.118	5	0.1	0.00138389
VC_2334	1	34	0.029	5	0.1	0.00138389
VC_2437	2	55	0.036	5	0.1	0.00138389
VC_2440	2	63	0.032	5	0.1	0.00138389
VC_2492	1	49	0.02	5	0.1	0.00138389
VC_2659	1	15	0.067	5	0.3	0.00138389
VC_2677	4	30	0.133	5	0.2	0.00138389
VC_A0011	1	104	0.01	5	0	0.00138389
VC_A0117	1	50	0.02	5	0.1	0.00138389
VC_A0205	1	57	0.018	5	0.1	0.00138389
VC_A0244	1	28	0.036	5	0.2	0.00138389
VC_A0253	1	33	0.03	5	0.2	0.00138389
VC_A0293	1	41	0.024	5	0.1	0.00138389
VC_A0310	1	22	0.045	5	0.2	0.00138389
VC_A0365	1	28	0.036	5	0.2	0.00138389
VC_A0419	1	70	0.014	5	0.1	0.00138389
VC_A0709	2	103	0.019	5	0	0.00138389
VC_A0767	4	33	0.121	5	0.2	0.00138389
VC_A0867	1	51	0.02	5	0.1	0.00138389
VC_A0899	1	3	0.333	5	1.7	0.00138389
VC_A0939	1	41	0.024	5	0.1	0.00138389
VC_A0987	2	71	0.028	5	0.1	0.00138389
VC_A1007	1	4	0.25	5	1.2	0.00138389
IG_VC_0077	1	4	0.25	4	1	0.00110711
IG_VC_0191	1	29	0.034	4	0.1	0.00110711
IG_VC_0304	1	12	0.083	4	0.3	0.00110711
IG_VC_0490	1	69	0.014	4	0.1	0.00110711
IG_VC_0511	1	21	0.048	4	0.2	0.00110711
IG_VC_0560	1	19	0.053	4	0.2	0.00110711
IG_VC_0630	1	5	0.2	4	0.8	0.00110711
IG_VC_0940	1	13	0.077	4	0.3	0.00110711
IG_VC_1362	1	11	0.091	4	0.4	0.00110711
IG_VC_1372	1	34	0.029	4	0.1	0.00110711
IG_VC_1393	1	9	0.111	4	0.4	0.00110711
IG_VC_1563	1	10	0.1	4	0.4	0.00110711
IG_VC_1637	1	18	0.056	4	0.2	0.00110711
IG_VC_1701	1	7	0.143	4	0.6	0.00110711
IG_VC_1823	2	14	0.143	4	0.3	0.00110711
IG_VC_2009	1	2	0.5	4	2	0.00110711
IG_VC_2032	1	5	0.2	4	0.8	0.00110711
IG_VC_2696	1	4	0.25	4	1	0.00110711
IG_VC_A0004	1	22	0.045	4	0.2	0.00110711
IG_VC_A0552	1	15	0.067	4	0.3	0.00110711
IG_VC_A0603	1	6	0.167	4	0.7	0.00110711
VC_0010	2	36	0.056	4	0.1	0.00110711
VC_0029	1	38	0.026	4	0.1	0.00110711
VC_0201	1	22	0.045	4	0.2	0.00110711
VC_0249	3	128	0.023	4	0	0.00110711
VC_0250	2	72	0.028	4	0.1	0.00110711
VC_0267	1	32	0.031	4	0.1	0.00110711
VC_0298	1	88	0.011	4	0	0.00110711
VC_0480	1	41	0.024	4	0.1	0.00110711
VC_0523	1	22	0.045	4	0.2	0.00110711
VC_0547	1	60	0.017	4	0.1	0.00110711
VC_0725	1	74	0.014	4	0.1	0.00110711
VC_0727	1	27	0.037	4	0.1	0.00110711
VC_0761	4	24	0.167	4	0.2	0.00110711
VC_0791	1	56	0.018	4	0.1	0.00110711
VC_0821	1	117	0.009	4	0	0.00110711
VC_1367	1	119	0.008	4	0	0.00110711	putative GGDEF family protein
VC_1660	1	93	0.011	4	0	0.00110711
VC_1675	1	42	0.024	4	0.1	0.00110711
VC_1757	1	119	0.008	4	0	0.00110711
VC_2005	3	19	0.158	4	0.2	0.00110711
VC_2039	1	52	0.019	4	0.1	0.00110711
VC_2073	1	16	0.062	4	0.2	0.00110711
VC_2077	1	121	0.008	4	0	0.00110711
VC_2081	4	48	0.083	4	0.1	0.00110711
VC_2125	2	16	0.125	4	0.2	0.00110711
VC_2126	2	33	0.061	4	0.1	0.00110711
VC_2135	3	67	0.045	4	0.1	0.00110711
VC_2142	2	44	0.045	4	0.1	0.00110711
VC_2185	1	46	0.022	4	0.1	0.00110711
VC_2203	2	32	0.062	4	0.1	0.00110711
VC_2622	1	40	0.025	4	0.1	0.00110711
VC_2624	2	31	0.065	4	0.1	0.00110711
VC_2628	2	43	0.047	4	0.1	0.00110711
VC_2669	1	12	0.083	4	0.3	0.00110711
VC_A0268	1	80	0.013	4	0.1	0.00110711
VC_A0838	1	13	0.077	4	0.3	0.00110711
VC_A0920	2	29	0.069	4	0.1	0.00110711
VC_A0997	1	26	0.038	4	0.2	0.00110711
VC_A1036	1	45	0.022	4	0.1	0.00110711
VC_A1082	1	58	0.017	4	0.1	0.00110711
VC_A1090	1	29	0.034	4	0.1	0.00110711
IG_VC_0152	1	16	0.062	3	0.2
IG_VC_0347	1	13	0.077	3	0.2
IG_VC_0365	1	6	0.167	3	0.5
IG_VC_0493	1	18	0.056	3	0.2
IG_VC_0504	1	18	0.056	3	0.2
IG_VC_0641	2	28	0.071	3	0.1
IG_VC_0668	1	7	0.143	3	0.4
IG_VC_1273	1	29	0.034	3	0.1
IG_VC_1864	1	12	0.083	3	0.2
IG_VC_2503	2	10	0.2	3	0.3
VC_0136	1	37	0.027	3	0.1
VC_0166	1	29	0.034	3	0.1
VC_0174	2	33	0.061	3	0.1
VC_0224	3	34	0.088	3	0.1
VC_0239	1	94	0.011	3	0
VC_0259	3	103	0.029	3	0
VC_0345	3	89	0.034	3	0
VC_0348	1	62	0.016	3	0
VC_0474	1	30	0.033	3	0.1
VC_0558	1	60	0.017	3	0.1
VC_0647	1	68	0.015	3	0
VC_0654	1	23	0.043	3	0.1
VC_0909	1	39	0.026	3	0.1
VC_0966	1	11	0.091	3	0.3
VC_0999	1	34	0.029	3	0.1
VC_1034	1	24	0.042	3	0.1
VC_1042	1	64	0.016	3	0
VC_1098	2	40	0.05	3	0.1
VC_1348	3	67	0.045	3	0
VC_1588	1	38	0.026	3	0.1
VC_1643	1	67	0.015	3	0
VC_1681	2	52	0.038	3	0.1
VC_1791	2	59	0.034	3	0.1
VC_1831	2	123	0.016	3	0
VC_1872	1	83	0.012	3	0
VC_1950	1	91	0.011	3	0
VC_1952	1	115	0.009	3	0
VC_1965	2	33	0.061	3	0.1
VC_1967	1	119	0.008	3	0
VC_1979	1	44	0.023	3	0.1
VC_2058	2	13	0.154	3	0.2
VC_2066	3	37	0.081	3	0.1
VC_2085	1	49	0.02	3	0.1
VC_2121	3	33	0.091	3	0.1
VC_2127	2	18	0.111	3	0.2
VC_2164	3	67	0.045	3	0
VC_2198	1	25	0.04	3	0.1
VC_2200	2	25	0.08	3	0.1
VC_2360	1	39	0.026	3	0.1
VC_2425	2	56	0.036	3	0.1
VC_2433	1	29	0.034	3	0.1
VC_2465	3	32	0.094	3	0.1
VC_2503	1	105	0.01	3	0
VC_2561	1	26	0.038	3	0.1
VC_2629	2	34	0.059	3	0.1
VC_2630	1	73	0.014	3	0
VC_A0153	1	25	0.04	3	0.1
VC_A0231	1	39	0.026	3	0.1
VC_A0537	1	23	0.043	3	0.1
VC_A0603	1	38	0.026	3	0.1
VC_A0662	1	28	0.036	3	0.1
VC_A0738	1	63	0.016	3	0		hypothetical protein
VC_A0956	1	50	0.02	3	0.1
IG_VC_0188	1	22	0.045	2	0.1
IG_VC_0397	1	20	0.05	2	0.1
IG_VC_0709	1	12	0.083	2	0.2
IG_VC_0747	1	9	0.111	2	0.2
IG_VC_0890	1	2	0.5	2	1
IG_VC_0995	2	35	0.057	2	0.1
IG_VC_1471	1	74	0.014	2	0
IG_VC_1479	1	73	0.014	2	0
IG_VC_1722	1	26	0.038	2	0.1
IG_VC_1797	1	59	0.017	2	0
IG_VC_2042	1	34	0.029	2	0.1
IG_VC_2134	1	2	0.5	2	1
IG_VC_2138	1	15	0.067	2	0.1
IG_VC_2145	1	7	0.143	2	0.3
IG_VC_2209	1	6	0.167	2	0.3
IG_VC_2358	1	6	0.167	2	0.3
IG_VC_2521	2	4	0.5	2	0.5
IG_VC_2552	1	3	0.333	2	0.7
IG_VC_2747	1	15	0.067	2	0.1		hypothetical protein
IG_VC_A0107	2	39	0.051	2	0.1
IG_VC_A0767	2	5	0.4	2	0.4
IG_VC_A0899	1	13	0.077	2	0.2
IG_VC_A0910	1	18	0.056	2	0.1
VC_0093	1	87	0.011	2	0
VC_0118	1	36	0.028	2	0.1
VC_0120	1	40	0.025	2	0.1
VC_0217	2	24	0.083	2	0.1
VC_0234	2	60	0.033	2	0
VC_0235	1	49	0.02	2	0
VC_0240	1	50	0.02	2	0
VC_0244	2	86	0.023	2	0
VC_0263	2	29	0.069	2	0.1
VC_0355	1	33	0.03	2	0.1
VC_0356	1	18	0.056	2	0.1
VC_0442	1	14	0.071	2	0.1
VC_0468	2	43	0.047	2	0
VC_0531	1	34	0.029	2	0.1
VC_0554	1	119	0.008	2	0
VC_0663	2	53	0.038	2	0
VC_0666	1	17	0.059	2	0.1		hypothetical protein (83 aa)
VC_0832	1	52	0.019	2	0
VC_1086	2	81	0.025	2	0
VC_1093	1	42	0.024	2	0
VC_1231	1	34	0.029	2	0.1
VC_1373	1	106	0.009	2	0
VC_1384	1	23	0.043	2	0.1		hypothetical protein (membrane protein)
VC_1413	1	81	0.012	2	0
VC_1424	2	55	0.036	2	0
VC_1426	2	39	0.051	2	0.1
VC_1466	1	9	0.111	2	0.2
VC_1472	1	7	0.143	2	0.3
VC_1516	1	83	0.012	2	0
VC_1598	1	49	0.02	2	0
VC_1609	1	54	0.019	2	0
VC_1619.1	1	254	0.004	2	0
VC_1627	2	65	0.031	2	0
VC_1669	1	61	0.016	2	0
VC_1673	1	133	0.008	2	0
VC_1783	1	53	0.019	2	0
VC_1800	1	42	0.024	2	0
VC_1900	1	43	0.023	2	0
VC_1901	1	79	0.013	2	0
VC_2003	1	41	0.024	2	0
VC_2136	2	32	0.062	2	0.1
VC_2139	2	17	0.118	2	0.1
VC_2174	1	80	0.013	2	0
VC_2184	1	25	0.04	2	0.1
VC_2196	1	26	0.038	2	0.1
VC_2205	2	19	0.105	2	0.1
VC_2228	1	6	0.167	2	0.3
VC_2242	1	42	0.024	2	0
VC_2260	1	42	0.024	2	0
VC_2273	1	47	0.021	2	0
VC_2310	1	10	0.1	2	0.2
VC_2415	1	29	0.034	2	0.1
VC_2442	2	59	0.034	2	0
VC_2518	1	16	0.062	2	0.1
VC_2523	1	34	0.029	2	0.1
VC_2671	1	62	0.016	2	0
VC_2689	1	43	0.023	2	0
VC_2698	1	62	0.016	2	0
VC_2746	2	63	0.032	2	0
VC_A0002	1	83	0.012	2	0
VC_A0131	1	34	0.029	2	0.1
VC_A0183	2	61	0.033	2	0
VC_A0199	1	163	0.006	2	0
VC_A0269	1	72	0.014	2	0
VC_A0559	1	60	0.017	2	0
VC_A0634	1	26	0.038	2	0.1
VC_A0683	1	66	0.015	2	0
VC_A0721	1	9	0.111	2	0.2
VC_A0805	1	66	0.015	2	0
VC_A0871	1	89	0.011	2	0
VC_A0930	1	39	0.026	2	0.1
VC_A1045	1	97	0.01	2	0
VC_A1050	1	37	0.027	2	0.1
IG_VC_0121	1	11	0.091	1	0.1
IG_VC_0265	1	12	0.083	1	0.1
IG_VC_0306	1	11	0.091	1	0.1
IG_VC_0392	1	17	0.059	1	0.1
IG_VC_0453	1	13	0.077	1	0.1
IG_VC_0501	1	37	0.027	1	0		pseudogene
IG_VC_0505	1	4	0.25	1	0.2
IG_VC_0654	1	23	0.043	1	0
IG_VC_0660	1	8	0.125	1	0.1
IG_VC_0866	1	12	0.083	1	0.1
IG_VC_1845	1	34	0.029	1	0
IG_VC_1900	1	14	0.071	1	0.1
IG_VC_2196	1	3	0.333	1	0.3
IG_VC_2395	1	23	0.043	1	0
IG_VC_2436	1	21	0.048	1	0
IG_VC_2468	1	31	0.032	1	0
IG_VC_A0002	1	54	0.019	1	0
IG_VC_A0331	1	6	0.167	1	0.2
IG_VC_A0978	1	11	0.091	1	0.1
VC_0005	1	16	0.062	1	0.1
VC_0014	1	51	0.02	1	0
VC_0015	1	100	0.01	1	0
VC_0022	1	34	0.029	1	0
VC_0027	1	54	0.019	1	0
VC_0035	1	42	0.024	1	0
VC_0056	1	43	0.023	1	0
VC_0062	1	75	0.013	1	0
VC_0064	1	11	0.091	1	0.1
VC_0085	1	72	0.014	1	0
VC_0124	1	12	0.083	1	0.1
VC_0126	1	30	0.033	1	0
VC_0164	1	136	0.007	1	0
VC_0165	1	55	0.018	1	0
VC_0182	1	36	0.028	1	0
VC_0203	1	62	0.016	1	0
VC_0261	1	8	0.125	1	0.1
VC_0282	1	52	0.019	1	0
VC_0300	1	53	0.019	1	0
VC_0334	1	47	0.021	1	0
VC_0337	1	41	0.024	1	0
VC_0376	1	53	0.019	1	0
VC_0377	1	14	0.071	1	0.1
VC_0383	1	8	0.125	1	0.1
VC_0389	1	71	0.014	1	0
VC_0393	1	107	0.009	1	0
VC_0418	1	23	0.043	1	0
VC_0458	1	10	0.1	1	0.1
VC_0482	1	46	0.022	1	0
VC_0508	1	29	0.034	1	0
VC_0564	1	21	0.048	1	0
VC_0587	1	73	0.014	1	0
VC_0626	1	45	0.022	1	0
VC_0640	1	15	0.067	1	0.1
VC_0648	1	50	0.02	1	0
VC_0651	1	44	0.023	1	0
VC_0659	1	62	0.016	1	0
VC_0709	1	35	0.029	1	0
VC_0760	1	59	0.017	1	0
VC_0820	1	300	0.003	1	0
VC_0912	1	3	0.333	1	0.3
VC_1050	1	46	0.022	1	0
VC_1249	1	24	0.042	1	0
VC_1262	1	6	0.167	1	0.2		hypothetical protein (58 aa)
VC_1297	1	57	0.018	1	0
VC_1314	1	71	0.014	1	0
VC_1349	1	191	0.005	1	0
VC_1350	1	21	0.048	1	0
VC_1403	1	78	0.013	1	0
VC_1427	1	53	0.019	1	0
VC_1469	1	70	0.014	1	0
VC_1475	1	70	0.014	1	0
VC_1503	1	46	0.022	1	0
VC_1533	1	39	0.026	1	0
VC_1549	1	65	0.015	1	0
VC_1581	1	71	0.014	1	0
VC_1595	1	40	0.025	1	0
VC_1596	1	48	0.021	1	0
VC_1621	1	71	0.014	1	0		putative Type I secretion outer membrane protein, TolC
VC_1629	1	120	0.008	1	0
VC_1741	1	38	0.026	1	0
VC_1795	1	18	0.056	1	0.1
VC_1797	1	26	0.038	1	0
VC_1833	1	50	0.02	1	0
VC_1850	1	38	0.026	1	0
VC_1885	1	18	0.056	1	0.1
VC_1886	1	135	0.007	1	0
VC_1918	1	83	0.012	1	0
VC_1942	1	42	0.024	1	0
VC_1984	1	50	0.02	1	0
VC_2012	1	87	0.011	1	0
VC_2067	1	48	0.021	1	0
VC_2096	1	21	0.048	1	0
VC_2122	1	13	0.077	1	0.1
VC_2124	1	14	0.071	1	0.1
VC_2143	1	43	0.023	1	0
VC_2181	1	25	0.04	1	0
VC_2187	1	44	0.023	1	0
VC_2193	1	35	0.029	1	0
VC_2206	1	22	0.045	1	0
VC_2223	1	49	0.02	1	0
VC_2247	1	41	0.024	1	0
VC_2309	1	42	0.024	1	0
VC_2352	1	56	0.018	1	0
VC_2376	1	145	0.007	1	0
VC_2400	1	59	0.017	1	0
VC_2420	1	26	0.038	1	0
VC_2456	1	64	0.016	1	0
VC_2485	1	29	0.034	1	0
VC_2512	1	13	0.077	1	0.1
VC_2600	1	90	0.011	1	0
VC_2606	1	69	0.014	1	0
VC_2633	1	22	0.045	1	0
VC_2647	1	31	0.032	1	0
VC_2684	1	90	0.011	1	0
VC_2736	1	34	0.029	1	0
VC_2772	1	31	0.032	1	0
VC_A0001	1	9	0.111	1	0.1
VC_A0021	1	50	0.02	1	0
VC_A0044	1	150	0.007	1	0
VC_A0080	1	104	0.01	1	0
VC_A0097	1	28	0.036	1	0
VC_A0123	1	161	0.006	1	0
VC_A0175	1	33	0.03	1	0
VC_A0274	1	31	0.032	1	0
VC_A0277	1	12	0.083	1	0.1
VC_A0510	1	160	0.006	1	0
VC_A0517	1	36	0.028	1	0
VC_A0536	1	46	0.022	1	0
VC_A0567	1	56	0.018	1	0		hypothetical protein
VC_A0600	1	35	0.029	1	0
VC_A0694	1	19	0.053	1	0.1
VC_A0731	1	18	0.056	1	0.1
VC_A0770	1	4	0.25	1	0.2
VC_A0776	1	28	0.036	1	0
VC_A0785	1	69	0.014	1	0		putative c-di-GMP synthetase with GAF and EAL domains
VC_A0843	1	78	0.013	1	0
VC_A0890	1	18	0.056	1	0.1
VC_A0905	1	41	0.024	1	0
VC_A0947	1	35	0.029	1	0
VC_A0952	1	42	0.024	1	0
VC_A0981	1	37	0.027	1	0
VC_A0985	1	99	0.01	1	0
VC_A0990	1	47	0.021	1	0
VC_A1067	1	58	0.017	1	0
VC_A1069	1	61	0.016	1	0
VC_A1075	1	53	0.019	1	0
IG_1	0	24	0	0	0
IG_VC_0003	0	1	0	0	0
IG_VC_0004	0	3	0	0	0
IG_VC_0007	0	1	0	0	0
IG_VC_0008	0	10	0	0	0
IG_VC_0010	0	6	0	0	0
IG_VC_0011	0	16	0	0	0
IG_VC_0012	0	3	0	0	0
IG_VC_0013	0	5	0	0	0
IG_VC_0014	0	3	0	0	0
IG_VC_0015	0	1	0	0	0
IG_VC_0016	0	19	0	0	0
IG_VC_0018	0	18	0	0	0
IG_VC_0019	0	3	0	0	0
IG_VC_0020	0	15	0	0	0
IG_VC_0022	0	14	0	0	0
IG_VC_0023	0	8	0	0	0
IG_VC_0024	0	5	0	0	0
IG_VC_0025	0	11	0	0	0
IG_VC_0026	0	8	0	0	0
IG_VC_0027	0	14	0	0	0
IG_VC_0033	0	6	0	0	0
IG_VC_0034	0	2	0	0	0
IG_VC_0035	0	1	0	0	0
IG_VC_0037	0	24	0	0	0
IG_VC_0038	0	6	0	0	0
IG_VC_0039	0	17	0	0	0
IG_VC_0040	0	5	0	0	0
IG_VC_0041	0	2	0	0	0
IG_VC_0045	0	3	0	0	0
IG_VC_0046	0	2	0	0	0
IG_VC_0049	0	1	0	0	0
IG_VC_0051	0	6	0	0	0
IG_VC_0061	0	20	0	0	0
IG_VC_0067	0	12	0	0	0
IG_VC_0069	0	4	0	0	0
IG_VC_0070	0	8	0	0	0
IG_VC_0072	0	5	0	0	0
IG_VC_0074	0	5	0	0	0
IG_VC_0075	0	2	0	0	0
IG_VC_0076	0	3	0	0	0
IG_VC_0078	0	1	0	0	0
IG_VC_0079	0	1	0	0	0
IG_VC_0080	0	6	0	0	0
IG_VC_0082	0	8	0	0	0
IG_VC_0083	0	1	0	0	0
IG_VC_0084	0	1	0	0	0
IG_VC_0086	0	3	0	0	0
IG_VC_0088	0	7	0	0	0
IG_VC_0089	0	20	0	0	0
IG_VC_0090	0	7	0	0	0
IG_VC_0091	0	5	0	0	0
IG_VC_0092	0	1	0	0	0
IG_VC_0093	0	12	0	0	0
IG_VC_0094	0	2	0	0	0
IG_VC_0096	0	2	0	0	0
IG_VC_0097	0	5	0	0	0
IG_VC_0098	0	3	0	0	0
IG_VC_0100	0	1	0	0	0
IG_VC_0102	0	7	0	0	0
IG_VC_0103	0	9	0	0	0
IG_VC_0104	0	2	0	0	0
IG_VC_0107	0	30	0	0	0
IG_VC_0108	0	6	0	0	0
IG_VC_0110	0	17	0	0	0
IG_VC_0111	0	16	0	0	0
IG_VC_0112	0	8	0	0	0
IG_VC_0113	0	10	0	0	0
IG_VC_0116	0	3	0	0	0
IG_VC_0117	0	1	0	0	0
IG_VC_0120	0	4	0	0	0
IG_VC_0123	0	6	0	0	0
IG_VC_0125	0	3	0	0	0
IG_VC_0130	0	9	0	0	0
IG_VC_0131	0	2	0	0	0
IG_VC_0134	0	3	0	0	0
IG_VC_0135	0	5	0	0	0
IG_VC_0136	0	2	0	0	0
IG_VC_0138	0	1	0	0	0
IG_VC_0139	0	4	0	0	0
IG_VC_0140	0	16	0	0	0
IG_VC_0141	0	4	0	0	0
IG_VC_0142	0	3	0	0	0
IG_VC_0143	0	42	0	0	0
IG_VC_0144	0	12	0	0	0
IG_VC_0145	0	3	0	0	0
IG_VC_0147	0	13	0	0	0
IG_VC_0150	0	6	0	0	0
IG_VC_0153	0	2	0	0	0
IG_VC_0154	0	1	0	0	0
IG_VC_0156	0	23	0	0	0
IG_VC_0157	0	4	0	0	0
IG_VC_0158	0	31	0	0	0
IG_VC_0162	0	11	0	0	0
IG_VC_0163	0	10	0	0	0
IG_VC_0164	0	9	0	0	0
IG_VC_0167	0	13	0	0	0
IG_VC_0168	0	5	0	0	0
IG_VC_0169	0	88	0	0	0
IG_VC_0170	0	5	0	0	0
IG_VC_0171	0	1	0	0	0
IG_VC_0172	0	4	0	0	0
IG_VC_0174	0	11	0	0	0
IG_VC_0175	0	18	0	0	0
IG_VC_0176	0	44	0	0	0
IG_VC_0177	0	13	0	0	0
IG_VC_0179	0	1	0	0	0
IG_VC_0182	0	3	0	0	0
IG_VC_0186	0	8	0	0	0
IG_VC_0187	0	5	0	0	0
IG_VC_0189	0	2	0	0	0
IG_VC_0192	0	3	0	0	0
IG_VC_0193	0	4	0	0	0
IG_VC_0194	0	1	0	0	0
IG_VC_0195	0	12	0	0	0
IG_VC_0196	0	11	0	0	0
IG_VC_0198	0	13	0	0	0
IG_VC_0199	0	1	0	0	0
IG_VC_0200	0	7	0	0	0
IG_VC_0201	0	1	0	0	0
IG_VC_0205	0	5	0	0	0
IG_VC_0208	0	6	0	0	0
IG_VC_0209	0	6	0	0	0
IG_VC_0210	0	7	0	0	0
IG_VC_0211	0	20	0	0	0
IG_VC_0212	0	5	0	0	0
IG_VC_0215	0	6	0	0	0
IG_VC_0216	0	8	0	0	0
IG_VC_0217	0	4	0	0	0
IG_VC_0218	0	16	0	0	0
IG_VC_0220	0	15	0	0	0
IG_VC_0222	0	5	0	0	0
IG_VC_0223	0	6	0	0	0
IG_VC_0224	0	5	0	0	0
IG_VC_0225	0	5	0	0	0
IG_VC_0228	0	1	0	0	0
IG_VC_0229	0	1	0	0	0
IG_VC_0239	0	1	0	0	0
IG_VC_0240	0	13	0	0	0
IG_VC_0241	0	42	0	0	0
IG_VC_0244	0	1	0	0	0
IG_VC_0248	0	6	0	0	0
IG_VC_0249	0	2	0	0	0
IG_VC_0252	0	5	0	0	0
IG_VC_0253	0	11	0	0	0
IG_VC_0254	0	18	0	0	0
IG_VC_0255	0	13	0	0	0
IG_VC_0256	0	1	0	0	0
IG_VC_0259	0	5	0	0	0
IG_VC_0261	0	8	0	0	0
IG_VC_0263	0	1	0	0	0
IG_VC_0264	0	6	0	0	0
IG_VC_0266	0	5	0	0	0
IG_VC_0271	0	24	0	0	0
IG_VC_0273	0	15	0	0	0
IG_VC_0275	0	6	0	0	0
IG_VC_0276	0	3	0	0	0
IG_VC_0277	0	15	0	0	0
IG_VC_0278	0	18	0	0	0
IG_VC_0279	0	21	0	0	0
IG_VC_0281	0	1	0	0	0
IG_VC_0282	0	5	0	0	0
IG_VC_0283	0	6	0	0	0
IG_VC_0285	0	14	0	0	0
IG_VC_0286	0	1	0	0	0
IG_VC_0287	0	15	0	0	0
IG_VC_0289	0	3	0	0	0
IG_VC_0290	0	12	0	0	0
IG_VC_0291	0	2	0	0	0
IG_VC_0293	0	4	0	0	0
IG_VC_0295	0	7	0	0	0
IG_VC_0299	0	7	0	0	0
IG_VC_0302	0	6	0	0	0
IG_VC_0303	0	2	0	0	0
IG_VC_0307	0	19	0	0	0
IG_VC_0308	0	5	0	0	0
IG_VC_0309	0	7	0	0	0
IG_VC_0313	0	15	0	0	0
IG_VC_0318	0	2	0	0	0
IG_VC_0320	0	2	0	0	0
IG_VC_0321	0	34	0	0	0
IG_VC_0322	0	10	0	0	0
IG_VC_0323	0	3	0	0	0
IG_VC_0324	0	10	0	0	0
IG_VC_0325	0	1	0	0	0
IG_VC_0326	0	20	0	0	0
IG_VC_0327	0	6	0	0	0
IG_VC_0328	0	10	0	0	0
IG_VC_0329	0	6	0	0	0
IG_VC_0330	0	6	0	0	0
IG_VC_0331	0	11	0	0	0
IG_VC_0332	0	17	0	0	0
IG_VC_0333	0	1	0	0	0
IG_VC_0334	0	4	0	0	0
IG_VC_0336	0	8	0	0	0
IG_VC_0337	0	13	0	0	0
IG_VC_0338	0	2	0	0	0
IG_VC_0339	0	9	0	0	0
IG_VC_0341	0	15	0	0	0
IG_VC_0342	0	101	0	0	0
IG_VC_0348	0	2	0	0	0
IG_VC_0349	0	5	0	0	0
IG_VC_0351	0	4	0	0	0
IG_VC_0352	0	2	0	0	0
IG_VC_0354	0	8	0	0	0
IG_VC_0355	0	12	0	0	0
IG_VC_0358	0	1	0	0	0
IG_VC_0359	0	14	0	0	0
IG_VC_0360	0	8	0	0	0
IG_VC_0361	0	6	0	0	0
IG_VC_0362	0	9	0	0	0
IG_VC_0363	0	8	0	0	0
IG_VC_0364	0	6	0	0	0
IG_VC_0366	0	15	0	0	0
IG_VC_0368	0	1	0	0	0
IG_VC_0369	0	3	0	0	0
IG_VC_0370	0	4	0	0	0
IG_VC_0371	0	9	0	0	0
IG_VC_0373	0	1	0	0	0
IG_VC_0375	0	3	0	0	0
IG_VC_0376	0	5	0	0	0
IG_VC_0377	0	3	0	0	0
IG_VC_0379	0	25	0	0	0
IG_VC_0381	0	6	0	0	0
IG_VC_0384	0	8	0	0	0
IG_VC_0390	0	10	0	0	0
IG_VC_0391	0	3	0	0	0
IG_VC_0393	0	6	0	0	0
IG_VC_0394	0	3	0	0	0
IG_VC_0395	0	11	0	0	0
IG_VC_0396	0	7	0	0	0
IG_VC_0398	0	11	0	0	0
IG_VC_0399	0	1	0	0	0
IG_VC_0402	0	2	0	0	0
IG_VC_0403	0	1	0	0	0
IG_VC_0406	0	1	0	0	0
IG_VC_0407	0	1	0	0	0
IG_VC_0408	0	9	0	0	0
IG_VC_0409	0	1	0	0	0
IG_VC_0410	0	5	0	0	0
IG_VC_0415	0	7	0	0	0
IG_VC_0416	0	4	0	0	0
IG_VC_0419	0	1	0	0	0
IG_VC_0420	0	1	0	0	0
IG_VC_0423	0	4	0	0	0
IG_VC_0425	0	10	0	0	0
IG_VC_0426	0	1	0	0	0
IG_VC_0431	0	25	0	0	0
IG_VC_0432	0	10	0	0	0
IG_VC_0433	0	32	0	0	0
IG_VC_0434	0	8	0	0	0
IG_VC_0435	0	17	0	0	0
IG_VC_0436	0	2	0	0	0
IG_VC_0437	0	15	0	0	0
IG_VC_0438	0	3	0	0	0
IG_VC_0440	0	1	0	0	0
IG_VC_0441	0	7	0	0	0
IG_VC_0443	0	5	0	0	0
IG_VC_0446	0	5	0	0	0
IG_VC_0447	0	8	0	0	0
IG_VC_0450	0	39	0	0	0
IG_VC_0454	0	4	0	0	0
IG_VC_0455	0	12	0	0	0
IG_VC_0457	0	3	0	0	0
IG_VC_0460	0	2	0	0	0
IG_VC_0461	0	2	0	0	0
IG_VC_0462	0	3	0	0	0
IG_VC_0463	0	2	0	0	0
IG_VC_0464	0	5	0	0	0
IG_VC_0465	0	5	0	0	0
IG_VC_0466	0	1	0	0	0
IG_VC_0467	0	5	0	0	0
IG_VC_0469	0	1	0	0	0
IG_VC_0470	0	9	0	0	0
IG_VC_0471	0	10	0	0	0
IG_VC_0472	0	8	0	0	0
IG_VC_0473	0	24	0	0	0
IG_VC_0474	0	4	0	0	0
IG_VC_0475	0	16	0	0	0
IG_VC_0476	0	2	0	0	0
IG_VC_0478	0	7	0	0	0
IG_VC_0479	0	14	0	0	0
IG_VC_0480	0	1	0	0	0
IG_VC_0481	0	7	0	0	0
IG_VC_0482	0	17	0	0	0
IG_VC_0483	0	5	0	0	0
IG_VC_0484	0	28	0	0	0
IG_VC_0485	0	4	0	0	0
IG_VC_0486	0	27	0	0	0
IG_VC_0487	0	8	0	0	0
IG_VC_0488	0	4	0	0	0
IG_VC_0489	0	14	0	0	0
IG_VC_0494	0	38	0	0	0
IG_VC_0495	0	4	0	0	0
IG_VC_0496	0	5	0	0	0
IG_VC_0497	0	5	0	0	0
IG_VC_0498	0	4	0	0	0
IG_VC_0499	0	7	0	0	0
IG_VC_0500	0	2	0	0	0
IG_VC_0502	0	34	0	0	0
IG_VC_0503	0	61	0	0	0
IG_VC_0506	0	1	0	0	0
IG_VC_0507	0	7	0	0	0
IG_VC_0509	0	2	0	0	0
IG_VC_0515	0	13	0	0	0
IG_VC_0516	0	53	0	0	0
IG_VC_0517	0	33	0	0	0
IG_VC_0518	0	9	0	0	0
IG_VC_0519	0	1	0	0	0
IG_VC_0520	0	3	0	0	0
IG_VC_0521	0	11	0	0	0
IG_VC_0522	0	12	0	0	0
IG_VC_0523	0	1	0	0	0
IG_VC_0524	0	12	0	0	0
IG_VC_0527	0	5	0	0	0
IG_VC_0530	0	3	0	0	0
IG_VC_0534	0	5	0	0	0
IG_VC_0535	0	4	0	0	0
IG_VC_0536	0	1	0	0	0
IG_VC_0537	0	6	0	0	0
IG_VC_0539	0	4	0	0	0
IG_VC_0540	0	1	0	0	0
IG_VC_0542	0	10	0	0	0
IG_VC_0544	0	3	0	0	0
IG_VC_0545	0	10	0	0	0
IG_VC_0546	0	4	0	0	0
IG_VC_0547	0	2	0	0	0
IG_VC_0550	0	3	0	0	0
IG_VC_0552	0	2	0	0	0
IG_VC_0556	0	3	0	0	0
IG_VC_0557	0	3	0	0	0
IG_VC_0558	0	4	0	0	0
IG_VC_0559	0	4	0	0	0
IG_VC_0561	0	12	0	0	0
IG_VC_0562	0	7	0	0	0
IG_VC_0563	0	2	0	0	0
IG_VC_0564	0	7	0	0	0
IG_VC_0565	0	4	0	0	0
IG_VC_0566	0	10	0	0	0
IG_VC_0567	0	7	0	0	0
IG_VC_0568	0	14	0	0	0
IG_VC_0570	0	7	0	0	0
IG_VC_0573	0	14	0	0	0
IG_VC_0576	0	7	0	0	0
IG_VC_0578	0	2	0	0	0
IG_VC_0583	0	11	0	0	0
IG_VC_0584	0	18	0	0	0
IG_VC_0586	0	2	0	0	0
IG_VC_0587	0	14	0	0	0
IG_VC_0588	0	7	0	0	0
IG_VC_0589	0	9	0	0	0
IG_VC_0591	0	2	0	0	0
IG_VC_0592	0	1	0	0	0
IG_VC_0595	0	6	0	0	0
IG_VC_0596	0	1	0	0	0
IG_VC_0597	0	10	0	0	0
IG_VC_0599	0	1	0	0	0
IG_VC_0603	0	11	0	0	0
IG_VC_0604	0	12	0	0	0
IG_VC_0605	0	8	0	0	0
IG_VC_0606	0	11	0	0	0
IG_VC_0608	0	7	0	0	0
IG_VC_0609	0	10	0	0	0
IG_VC_0611	0	4	0	0	0
IG_VC_0612	0	7	0	0	0
IG_VC_0613	0	6	0	0	0
IG_VC_0616	0	2	0	0	0
IG_VC_0617	0	2	0	0	0
IG_VC_0621	0	38	0	0	0
IG_VC_0623	0	3	0	0	0
IG_VC_0624	0	2	0	0	0
IG_VC_0625	0	3	0	0	0
IG_VC_0626	0	1	0	0	0
IG_VC_0627	0	18	0	0	0
IG_VC_0628	0	8	0	0	0
IG_VC_0631	0	10	0	0	0
IG_VC_0632	0	5	0	0	0
IG_VC_0633	0	4	0	0	0
IG_VC_0634	0	37	0	0	0
IG_VC_0635	0	3	0	0	0
IG_VC_0636	0	14	0	0	0
IG_VC_0637	0	16	0	0	0
IG_VC_0638	0	5	0	0	0
IG_VC_0639	0	2	0	0	0
IG_VC_0640	0	14	0	0	0
IG_VC_0642	0	1	0	0	0
IG_VC_0646	0	8	0	0	0
IG_VC_0647	0	30	0	0	0
IG_VC_0648	0	8	0	0	0
IG_VC_0649	0	6	0	0	0
IG_VC_0651	0	2	0	0	0
IG_VC_0653	0	6	0	0	0
IG_VC_0656	0	6	0	0	0
IG_VC_0659	0	14	0	0	0
IG_VC_0661	0	7	0	0	0
IG_VC_0662	0	28	0	0	0
IG_VC_0663	0	15	0	0	0
IG_VC_0664	0	2	0	0	0
IG_VC_0666	0	33	0	0	0
IG_VC_0667	0	1	0	0	0
IG_VC_0669	0	20	0	0	0
IG_VC_0675	0	2	0	0	0
IG_VC_0676	0	7	0	0	0
IG_VC_0677	0	31	0	0	0
IG_VC_0678	0	13	0	0	0
IG_VC_0679	0	4	0	0	0
IG_VC_0680	0	15	0	0	0
IG_VC_0681	0	6	0	0	0
IG_VC_0682	0	3	0	0	0
IG_VC_0683	0	2	0	0	0
IG_VC_0684	0	10	0	0	0
IG_VC_0685	0	4	0	0	0
IG_VC_0689	0	1	0	0	0
IG_VC_0690	0	1	0	0	0
IG_VC_0691	0	1	0	0	0
IG_VC_0692	0	5	0	0	0
IG_VC_0693	0	2	0	0	0
IG_VC_0694	0	1	0	0	0
IG_VC_0695	0	20	0	0	0
IG_VC_0696	0	1	0	0	0
IG_VC_0697	0	1	0	0	0
IG_VC_0698	0	5	0	0	0
IG_VC_0699	0	12	0	0	0
IG_VC_0700	0	8	0	0	0
IG_VC_0702	0	2	0	0	0
IG_VC_0705	0	14	0	0	0
IG_VC_0706	0	15	0	0	0
IG_VC_0707	0	19	0	0	0
IG_VC_0711	0	8	0	0	0
IG_VC_0712	0	16	0	0	0
IG_VC_0716	0	1	0	0	0
IG_VC_0718	0	7	0	0	0
IG_VC_0719	0	13	0	0	0
IG_VC_0720	0	2	0	0	0
IG_VC_0722	0	1	0	0	0
IG_VC_0724	0	17	0	0	0
IG_VC_0725	0	1	0	0	0
IG_VC_0726	0	1	0	0	0
IG_VC_0727	0	3	0	0	0
IG_VC_0728	0	2	0	0	0
IG_VC_0729	0	3	0	0	0
IG_VC_0730	0	3	0	0	0
IG_VC_0732	0	20	0	0	0
IG_VC_0733	0	20	0	0	0
IG_VC_0734	0	17	0	0	0
IG_VC_0736	0	4	0	0	0
IG_VC_0737	0	7	0	0	0
IG_VC_0738	0	6	0	0	0
IG_VC_0739	0	5	0	0	0
IG_VC_0742	0	5	0	0	0
IG_VC_0743	0	1	0	0	0
IG_VC_0744	0	2	0	0	0
IG_VC_0745	0	11	0	0	0
IG_VC_0746	0	7	0	0	0
IG_VC_0748	0	2	0	0	0
IG_VC_0749	0	3	0	0	0
IG_VC_0750	0	4	0	0	0
IG_VC_0751	0	2	0	0	0
IG_VC_0754	0	4	0	0	0
IG_VC_0755	0	8	0	0	0
IG_VC_0757	0	11	0	0	0
IG_VC_0758	0	17	0	0	0
IG_VC_0760	0	3	0	0	0
IG_VC_0761	0	2	0	0	0
IG_VC_0763	0	16	0	0	0
IG_VC_0764	0	3	0	0	0
IG_VC_0765	0	25	0	0	0
IG_VC_0767	0	16	0	0	0
IG_VC_0768	0	7	0	0	0
IG_VC_0769	0	20	0	0	0
IG_VC_0770	0	15	0	0	0
IG_VC_0771	0	17	0	0	0
IG_VC_0772	0	6	0	0	0
IG_VC_0773	0	1	0	0	0
IG_VC_0774	0	10	0	0	0
IG_VC_0776	0	13	0	0	0
IG_VC_0779	0	4	0	0	0
IG_VC_0781	0	2	0	0	0
IG_VC_0783	0	9	0	0	0
IG_VC_0784	0	5	0	0	0
IG_VC_0785	0	23	0	0	0
IG_VC_0787	0	7	0	0	0
IG_VC_0788	0	9	0	0	0
IG_VC_0789	0	11	0	0	0
IG_VC_0792	0	6	0	0	0
IG_VC_0795	0	4	0	0	0
IG_VC_0796	0	27	0	0	0
IG_VC_0797	0	4	0	0	0
IG_VC_0803	0	3	0	0	0
IG_VC_0804	0	12	0	0	0
IG_VC_0805	0	4	0	0	0
IG_VC_0806	0	4	0	0	0
IG_VC_0807	0	1	0	0	0
IG_VC_0811	0	37	0	0	0
IG_VC_0812	0	11	0	0	0
IG_VC_0814	0	28	0	0	0
IG_VC_0816	0	15	0	0	0
IG_VC_0817	0	30	0	0	0
IG_VC_0818	0	3	0	0	0
IG_VC_0819	0	39	0	0	0
IG_VC_0820	0	9	0	0	0
IG_VC_0821	0	16	0	0	0
IG_VC_0822	0	13	0	0	0
IG_VC_0824	0	16	0	0	0
IG_VC_0825	0	24	0	0	0
IG_VC_0826	0	53	0	0	0
IG_VC_0828	0	40	0	0	0
IG_VC_0829	0	11	0	0	0
IG_VC_0831	0	1	0	0	0
IG_VC_0834	0	1	0	0	0
IG_VC_0837	0	2	0	0	0
IG_VC_0838	0	28	0	0	0
IG_VC_0840	0	1	0	0	0
IG_VC_0841	0	1	0	0	0
IG_VC_0842	0	2	0	0	0
IG_VC_0843	0	2	0	0	0
IG_VC_0845	0	21	0	0	0
IG_VC_0846	0	69	0	0	0
IG_VC_0847	0	41	0	0	0
IG_VC_0848	0	41	0	0	0
IG_VC_0849	0	9	0	0	0
IG_VC_0851	0	1	0	0	0
IG_VC_0852	0	3	0	0	0
IG_VC_0853	0	13	0	0	0
IG_VC_0854	0	7	0	0	0
IG_VC_0855	0	15	0	0	0
IG_VC_0856	0	12	0	0	0
IG_VC_0857	0	1	0	0	0
IG_VC_0858	0	6	0	0	0
IG_VC_0862	0	1	0	0	0
IG_VC_0864	0	3	0	0	0
IG_VC_0865	0	2	0	0	0
IG_VC_0870	0	10	0	0	0
IG_VC_0871	0	7	0	0	0
IG_VC_0873	0	6	0	0	0
IG_VC_0874	0	2	0	0	0
IG_VC_0876	0	14	0	0	0
IG_VC_0877	0	2	0	0	0
IG_VC_0878	0	1	0	0	0
IG_VC_0880	0	14	0	0	0
IG_VC_0881	0	3	0	0	0
IG_VC_0883	0	28	0	0	0
IG_VC_0884	0	2	0	0	0
IG_VC_0887	0	7	0	0	0
IG_VC_0889	0	3	0	0	0
IG_VC_0892	0	21	0	0	0
IG_VC_0893	0	1	0	0	0
IG_VC_0895	0	15	0	0	0
IG_VC_0897	0	2	0	0	0
IG_VC_0898	0	1	0	0	0
IG_VC_0899	0	1	0	0	0
IG_VC_0900	0	22	0	0	0
IG_VC_0901	0	7	0	0	0
IG_VC_0902	0	2	0	0	0
IG_VC_0903	0	2	0	0	0
IG_VC_0905	0	7	0	0	0
IG_VC_0908	0	21	0	0	0
IG_VC_0909	0	4	0	0	0
IG_VC_0910	0	14	0	0	0
IG_VC_0911	0	5	0	0	0
IG_VC_0913	0	14	0	0	0
IG_VC_0915	0	4	0	0	0
IG_VC_0916	0	34	0	0	0
IG_VC_0923	0	1	0	0	0
IG_VC_0928	0	20	0	0	0		rbmA
IG_VC_0929	0	23	0	0	0		rbmB
IG_VC_0930	0	20	0	0	0		rbmD
IG_VC_0931	0	8	0	0	0		rbmE
IG_VC_0932	0	11	0	0	0		rbmF
IG_VC_0934	0	53	0	0	0
IG_VC_0935	0	6	0	0	0
IG_VC_0937	0	3	0	0	0
IG_VC_0941	0	23	0	0	0
IG_VC_0942	0	7	0	0	0
IG_VC_0943	0	8	0	0	0
IG_VC_0945	0	17	0	0	0
IG_VC_0948	0	7	0	0	0
IG_VC_0953	0	5	0	0	0
IG_VC_0955	0	2	0	0	0
IG_VC_0956	0	2	0	0	0
IG_VC_0958	0	4	0	0	0
IG_VC_0959	0	4	0	0	0
IG_VC_0960	0	8	0	0	0
IG_VC_0962	0	5	0	0	0
IG_VC_0963	0	18	0	0	0
IG_VC_0964	0	7	0	0	0
IG_VC_0966	0	8	0	0	0
IG_VC_0967	0	9	0	0	0
IG_VC_0968	0	1	0	0	0
IG_VC_0969	0	11	0	0	0
IG_VC_0970	0	12	0	0	0
IG_VC_0971	0	12	0	0	0
IG_VC_0973	0	5	0	0	0
IG_VC_0974	0	2	0	0	0
IG_VC_0975	0	3	0	0	0
IG_VC_0977	0	35	0	0	0
IG_VC_0978	0	9	0	0	0
IG_VC_0979	0	7	0	0	0
IG_VC_0980	0	4	0	0	0
IG_VC_0981	0	20	0	0	0
IG_VC_0982	0	3	0	0	0
IG_VC_0983	0	3	0	0	0
IG_VC_0985	0	13	0	0	0
IG_VC_0986	0	23	0	0	0
IG_VC_0987	0	10	0	0	0
IG_VC_0988	0	4	0	0	0
IG_VC_0989	0	18	0	0	0
IG_VC_0990	0	3	0	0	0
IG_VC_0991	0	8	0	0	0
IG_VC_0992	0	14	0	0	0
IG_VC_0993	0	14	0	0	0
IG_VC_0994	0	1	0	0	0
IG_VC_0996	0	10	0	0	0
IG_VC_0997	0	2	0	0	0
IG_VC_0999	0	9	0	0	0
IG_VC_1000	0	11	0	0	0
IG_VC_1001	0	6	0	0	0
IG_VC_1003	0	3	0	0	0
IG_VC_1004	0	1	0	0	0
IG_VC_1005	0	4	0	0	0
IG_VC_1006	0	4	0	0	0
IG_VC_1007	0	2	0	0	0
IG_VC_1008	0	5	0	0	0
IG_VC_1009	0	2	0	0	0
IG_VC_1010	0	8	0	0	0
IG_VC_1012	0	1	0	0	0
IG_VC_1018	0	52	0	0	0
IG_VC_1021	0	22	0	0	0
IG_VC_1024	0	26	0	0	0
IG_VC_1025	0	3	0	0	0
IG_VC_1028	0	1	0	0	0
IG_VC_1029	0	2	0	0	0
IG_VC_1030	0	7	0	0	0
IG_VC_1031	0	2	0	0	0
IG_VC_1035	0	5	0	0	0
IG_VC_1036	0	12	0	0	0
IG_VC_1038	0	11	0	0	0
IG_VC_1039	0	4	0	0	0
IG_VC_1040	0	5	0	0	0
IG_VC_1041	0	5	0	0	0
IG_VC_1042	0	1	0	0	0
IG_VC_1043	0	25	0	0	0
IG_VC_1044	0	19	0	0	0
IG_VC_1046	0	22	0	0	0
IG_VC_1048	0	8	0	0	0
IG_VC_1049	0	7	0	0	0
IG_VC_1050	0	20	0	0	0
IG_VC_1051	0	13	0	0	0
IG_VC_1053	0	5	0	0	0
IG_VC_1054	0	1	0	0	0
IG_VC_1055	0	2	0	0	0
IG_VC_1056	0	1	0	0	0
IG_VC_1057	0	6	0	0	0
IG_VC_1058	0	9	0	0	0
IG_VC_1059	0	3	0	0	0
IG_VC_1060	0	9	0	0	0
IG_VC_1061	0	6	0	0	0
IG_VC_1062	0	4	0	0	0
IG_VC_1064	0	10	0	0	0
IG_VC_1065	0	3	0	0	0
IG_VC_1066	0	5	0	0	0
IG_VC_1067	0	8	0	0	0
IG_VC_1068	0	31	0	0	0
IG_VC_1070	0	2	0	0	0
IG_VC_1071	0	2	0	0	0
IG_VC_1072	0	12	0	0	0
IG_VC_1073	0	23	0	0	0
IG_VC_1074	0	5	0	0	0
IG_VC_1075	0	19	0	0	0
IG_VC_1076	0	1	0	0	0
IG_VC_1078	0	5	0	0	0
IG_VC_1079	0	2	0	0	0
IG_VC_1080	0	20	0	0	0
IG_VC_1082	0	3	0	0	0
[truncated: 4,643 more rows]

## Sheet: Tnseq1res_HitFraction
Locus	# of hit TAs	Total TAs	Fraction TAs hit	Total reads	Avg_Reads per TA
VC_0921	10	96	0.104	63551	662
VC_0374	6	65	0.092	60442	929.9
VC_2726	6	42	0.143	55941	1331.9
VC_0604	7	110	0.064	52592	478.1
VC_2290	11	63	0.175	44542	707
VC_0937	10	109	0.092	39454	362
VC_0665	10	58	0.172	38616	665.8
VC_2414	4	108	0.037	33561	310.8
VC_0922	10	92	0.109	33545	364.6
VC_2092	5	65	0.077	33477	515
VC_0917	6	51	0.118	29243	573.4
VC_0935	7	63	0.111	27817	441.5
VC_A0074	9	51	0.176	27062	530.6
VC_0918	9	56	0.161	26302	469.7
VC_2436	6	60	0.1	24951	415.9
VC_2701	8	68	0.118	22225	326.8
VC_0934	8	79	0.101	20765	262.8
VC_2087	3	113	0.027	20026	177.2
VC_1920	7	93	0.075	19301	207.5
VC_0925	4	52	0.077	18911	363.7
VC_0920	7	61	0.115	16705	273.9
VC_2291	5	38	0.132	16585	436.4
VC_0927	4	33	0.121	15296	463.5
VC_2089	5	80	0.062	14860	185.8
VC_2091	1	13	0.077	13392	1030.2
VC_2051	4	28	0.143	13373	477.6
VC_1442	6	85	0.071	13327	156.8
VC_0094	2	47	0.043	13271	282.4
IG_VC_1933	3	10	0.3	12427	1242.7
VC_1437	8	119	0.067	12228	102.8
VC_2293	4	30	0.133	11478	382.6
VC_0924	3	70	0.043	11116	158.8
VC_A0075	5	27	0.185	10759	398.5
VC_2294	3	60	0.05	10462	174.4
VC_1141	4	96	0.042	10325	107.6
VC_2052	5	89	0.056	9886	111.1
VC_A0039	4	18	0.222	9670	537.2
VC_2086	1	51	0.02	8508	166.8
VC_A0040	4	47	0.085	8298	176.6
VC_2153	2	34	0.059	8261	243
VC_1730	3	99	0.03	8008	80.9
VC_2413	3	60	0.05	7727	128.8
VC_2733	1	71	0.014	7473	105.3
VC_2210	2	44	0.045	7333	166.7
VC_0936	4	22	0.182	6601	300
VC_2724	1	17	0.059	5760	338.8
VC_2053	3	23	0.13	5663	246.2
VC_A0774	2	60	0.033	5553	92.5
VC_2090	1	23	0.043	5271	229.2
VC_1435	2	36	0.056	5058	140.5
VC_2544	4	38	0.105	5027	132.3
VC_1441	3	29	0.103	5015	172.9
VC_2418	1	36	0.028	4719	131.1
VC_1439	3	51	0.059	4684	91.8
VC_0036	2	61	0.033	4427	72.6
VC_0594	4	49	0.082	3987	81.4
VC_2295	2	56	0.036	3968	70.9
VC_0576	1	31	0.032	3950	127.4
VC_2453	1	113	0.009	3674	32.5
VC_2088	1	37	0.027	3673	99.3
VC_A0038	2	34	0.059	3670	107.9
VC_2292	1	37	0.027	3008	81.3
VC_2614	3	24	0.125	2819	117.5
VC_1867	1	59	0.017	2781	47.1
VC_0328	1	188	0.005	2718	14.5
IG_VC_A0844	1	4	0.25	2692	673
VC_0926	1	59	0.017	2597	44
VC_0919	3	38	0.079	2547	67
VC_2412	1	55	0.018	2438	44.3
VC_A0895	2	138	0.014	2407	17.4
VC_0395	1	43	0.023	2238	52
VC_0303	5	144	0.035	2227	15.5
IG_VC_0512	3	77	0.039	2190	28.4
VC_A0016	2	92	0.022	2154	23.4
VC_1748	1	35	0.029	2012	57.5
VC_0386	1	44	0.023	1908	43.4
VC_A0894	1	26	0.038	1891	72.7
VC_A1113	1	58	0.017	1828	31.5
VC_0525	1	18	0.056	1807	100.4
VC_2055	1	34	0.029	1799	52.9
VC_1018	2	91	0.022	1656	18.2
VC_A0262	1	20	0.05	1542	77.1
VC_2057	2	24	0.083	1425	59.4
VC_A0196	1	26	0.038	1402	53.9
VC_0943	2	42	0.048	1346	32
VC_A0368	1	49	0.02	1324	27
IG_VC_0665	1	24	0.042	1300	54.2
VC_0944	2	33	0.061	979	29.7
VC_1210	1	34	0.029	893	26.3
VC_2765	1	41	0.024	789	19.2
IG_VC_2291	1	4	0.25	646	161.5
VC_1899	1	71	0.014	571	8
VC_A0351	2	38	0.053	546	14.4
VC_A0402	2	34	0.059	532	15.6
IG_VC_A0390	1	15	0.067	528	35.2
IG_VC_A0422	1	13	0.077	528	40.6
IG_VC_A0434	1	8	0.125	528	66
VC_A0388	1	53	0.019	528	10
IG_VC_A0330	3	81	0.037	397	4.9
IG_VC_A0307	1	12	0.083	377	31.4
IG_VC_A0495	1	8	0.125	377	47.1
IG_VC_A0418	2	39	0.051	264	6.8
IG_VC_A0383	2	58	0.034	262	4.5
IG_VC_A0391	2	39	0.051	259	6.6
IG_VC_A0417	1	17	0.059	244	14.4
IG_VC_2752	25	647	0.039	218	0.3
VC_0419	2	55	0.036	207	3.8
IG_VC_A0463	3	70	0.043	165	2.4
VC_A0380	2	30	0.067	153	5.1
IG_VC_A0415	1	6	0.167	143	23.8
IG_VC_A0396	1	10	0.1	139	13.9
IG_VC_A0492	1	4	0.25	139	34.8
IG_VC_A0317	1	4	0.25	135	33.8
IG_VC_A0465	1	8	0.125	135	16.9
IG_VC_A0304	1	11	0.091	133	12.1
IG_VC_A0313	1	16	0.062	133	8.3
IG_VC_A0357	1	28	0.036	133	4.8
IG_VC_A0387	1	14	0.071	133	9.5
IG_VC_A0398	1	5	0.2	133	26.6
IG_VC_A0426	1	8	0.125	133	16.6
IG_VC_A0450	1	6	0.167	133	22.2
IG_VC_A0466	1	22	0.045	133	6
IG_VC_A0479	1	5	0.2	133	26.6
VC_A0464	1	21	0.048	133	6.3
IG_VC_A0433	2	8	0.25	132	16.5
IG_VC_A0346	2	15	0.133	131	8.7
IG_VC_A0467	1	21	0.048	131	6.2
IG_VC_A0407	1	13	0.077	130	10
IG_VC_A0425	1	13	0.077	130	10
IG_VC_A0451	1	7	0.143	130	18.6
VC_A0359	1	13	0.077	130	10
IG_VC_A0293	1	7	0.143	129	18.4
IG_VC_A0300	1	8	0.125	129	16.1
IG_VC_A0302	1	7	0.143	129	18.4
IG_VC_A0308	1	8	0.125	129	16.1
IG_VC_A0316	1	6	0.167	129	21.5
IG_VC_A0318	1	10	0.1	129	12.9
IG_VC_A0323	1	6	0.167	129	21.5
IG_VC_A0329	1	7	0.143	129	18.4
IG_VC_A0338	1	5	0.2	129	25.8
IG_VC_A0340	1	15	0.067	129	8.6
IG_VC_A0341	1	6	0.167	129	21.5
IG_VC_A0342	1	8	0.125	129	16.1
IG_VC_A0345	1	6	0.167	129	21.5
IG_VC_A0352	1	15	0.067	129	8.6
IG_VC_A0358	1	12	0.083	129	10.8
IG_VC_A0365	1	7	0.143	129	18.4
IG_VC_A0376	1	12	0.083	129	10.8
IG_VC_A0381	1	10	0.1	129	12.9
IG_VC_A0401	1	7	0.143	129	18.4
IG_VC_A0403	1	7	0.143	129	18.4
IG_VC_A0405	1	17	0.059	129	7.6
IG_VC_A0406	1	7	0.143	129	18.4
IG_VC_A0408	1	7	0.143	129	18.4
IG_VC_A0413	1	9	0.111	129	14.3
IG_VC_A0429	1	17	0.059	129	7.6
IG_VC_A0437	1	12	0.083	129	10.8
IG_VC_A0439	1	13	0.077	129	9.9
IG_VC_A0446	1	22	0.045	129	5.9
IG_VC_A0461	1	6	0.167	129	21.5
IG_VC_A0480	1	15	0.067	129	8.6
IG_VC_A0481	1	14	0.071	129	9.2
VC_A0360	1	27	0.037	129	4.8
VC_A0377	1	5	0.2	129	25.8
VC_A0395	1	49	0.02	129	2.6
VC_A0397	1	36	0.028	129	3.6
VC_A0420	1	17	0.059	129	7.6
VC_A0502	1	8	0.125	129	16.1
IG_VC_A0322	1	8	0.125	116	14.5
IG_VC_A0339	1	10	0.1	116	11.6
IG_VC_A0343	1	7	0.143	116	16.6
IG_VC_A0374	1	6	0.167	116	19.3
IG_VC_A0410	1	8	0.125	116	14.5
IG_VC_A0490	1	6	0.167	116	19.3
IG_VC_A0499	1	4	0.25	116	29
IG_VC_A0501	1	15	0.067	116	7.7
IG_VC_A0389	1	14	0.071	104	7.4
IG_VC_A0404	1	13	0.077	104	8
IG_VC_A0485	1	5	0.2	104	20.8
VC_A0424	1	19	0.053	104	5.5
VC_0866	2	70	0.029	103	1.5
IG_VC_0060	12	315	0.038	89	0.3
IG_VC_0161	12	300	0.04	87	0.3
IG_VC_0389	12	329	0.036	87	0.3
IG_VC_0714	11	307	0.036	87	0.3
IG_VC_2495	11	305	0.036	85	0.3
IG_VC_0315	11	305	0.036	83	0.3
VC_A0736	1	104	0.01	80	0.8
VC_A0849	5	394	0.013	78	0.2
VC_0200	4	101	0.04	75	0.7
IG_VC_2614	1	20	0.05	70	3.5
VC_0773	1	37	0.027	66	1.8
VC_0581	2	86	0.023	63	0.7
IG_VC_0549	6	93	0.065	60	0.6
VC_0777	2	45	0.044	59	1.3
VC_0069	4	65	0.062	58	0.9
VC_0061	2	105	0.019	54	0.5
VC_0280	3	51	0.059	54	1.1
VC_2703	1	69	0.014	54	0.8
VC_2645	2	47	0.043	53	1.1
IG_VC_1720	1	15	0.067	52	3.5
VC_0755	1	52	0.019	50	1
VC_2750	17	139	0.122	50	0.4
VC_1784	2	129	0.016	49	0.4
VC_0033	4	42	0.095	47	1.1
VC_0629	3	135	0.022	47	0.3
VC_1073	2	120	0.017	47	0.4
VC_1754	3	84	0.036	45	0.5
VC_1276	1	49	0.02	44	0.9
VC_0394	3	117	0.026	43	0.4
VC_0567	2	20	0.1	43	2.1
VC_0488	2	48	0.042	40	0.8
VC_1304	1	60	0.017	40	0.7
VC_2364	3	89	0.034	40	0.4
VC_1232	1	33	0.03	39	1.2
VC_1704	2	90	0.022	39	0.4
VC_2082	3	36	0.083	39	1.1
VC_2129	3	17	0.176	39	2.3
VC_2370	1	72	0.014	39	0.5
VC_2438	2	102	0.02	39	0.4
VC_0535	3	100	0.03	38	0.4
VC_0941	2	54	0.037	38	0.7
VC_1653	2	200	0.01	37	0.2
IG_VC_2002	2	28	0.071	36	1.3
IG_VC_A0098	2	28	0.071	36	1.3
VC_0312	3	36	0.083	36	1
VC_2638	1	53	0.019	36	0.7
IG_VC_A0311	1	5	0.2	35	7
IG_VC_A0443	1	6	0.167	35	5.8
VC_1765	1	169	0.006	35	0.2
IG_VC_2287	1	17	0.059	34	2
VC_0342	1	41	0.024	34	0.8
VC_0420	17	146	0.116	34	0.2
VC_0623	1	55	0.018	34	0.6
VC_1205	1	44	0.023	34	0.8
VC_1343	1	44	0.023	34	0.8
VC_2641	2	46	0.043	34	0.7
VC_A0191	1	69	0.014	34	0.5
VC_A0855	1	32	0.031	34	1.1
VC_0156	3	123	0.024	33	0.3
VC_1782	1	51	0.02	33	0.6
VC_2535	10	59	0.169	33	0.6
IG_VC_2522	2	11	0.182	32	2.9
VC_0270	2	66	0.03	32	0.5
VC_0275	1	35	0.029	32	0.9
VC_2322	1	114	0.009	32	0.3
VC_2710	4	83	0.048	32	0.4
IG_VC_0160	1	26	0.038	31	1.2
IG_VC_0314	1	4	0.25	31	7.8
IG_VC_0388	1	4	0.25	31	7.8
VC_0059	1	7	0.143	31	4.4
VC_0122	2	105	0.019	31	0.3
VC_0710	2	25	0.08	31	1.2
VC_1758	2	75	0.027	31	0.4
VC_2162	1	57	0.018	31	0.5
VC_2336	2	15	0.133	31	2.1
VC_2496	1	6	0.167	31	5.2
VC_2520	2	33	0.061	31	0.9
VC_2644	2	39	0.051	31	0.8
VC_2753	1	7	0.143	31	4.4
VC_A0085	2	63	0.032	31	0.5
VC_A1040	1	44	0.023	31	0.7
IG_VC_2409	1	1	1	29	29
IG_VC_A0327	1	9	0.111	29	3.2
IG_VC_A0444	1	6	0.167	29	4.8
IG_VC_A0448	1	20	0.05	29	1.4
VC_0026	1	39	0.026	29	0.7
VC_0067	2	72	0.028	29	0.4
VC_0112	2	44	0.045	29	0.7
VC_0414	3	209	0.014	29	0.1
VC_0462	2	38	0.053	29	0.8
VC_0948	2	50	0.04	29	0.6
VC_2424	1	69	0.014	29	0.4
VC_A0276	1	86	0.012	29	0.3
VC_A1088	1	59	0.017	29	0.5
IG_VC_0032	3	36	0.083	28	0.8
VC_0028	2	60	0.033	28	0.5
VC_0309	1	88	0.011	28	0.3
VC_0712	1	6	0.167	28	4.7
VC_0717	2	63	0.032	28	0.4
VC_1160	2	46	0.043	28	0.6
VC_1823	1	10	0.1	28	2.8
VC_1963	1	19	0.053	28	1.5
VC_2188	7	41	0.171	28	0.7
VC_2493	1	28	0.036	28	1
VC_2542	1	53	0.019	28	0.5
VC_2636	1	39	0.026	28	0.7
VC_2668	1	16	0.062	28	1.8
VC_A0161	3	74	0.041	28	0.4
VC_A0639	1	36	0.028	28	0.8
VC_A1015	1	60	0.017	28	0.5
VC_0127	1	28	0.036	27	1
VC_0311	1	15	0.067	27	1.8
VC_0421	4	34	0.118	27	0.8
VC_0502	1	39	0.026	27	0.7
VC_0533	1	64	0.016	27	0.4
VC_1399	1	55	0.018	27	0.5
VC_1416	2	158	0.013	27	0.2
VC_1451	4	589	0.007	27	0
VC_2132	5	29	0.172	27	0.9
VC_2562	3	93	0.032	27	0.3
VC_2713	2	52	0.038	27	0.5
VC_A0449	1	18	0.056	27	1.5
VC_A0549	2	21	0.095	27	1.3
VC_A0667	2	108	0.019	27	0.2
VC_A0798	1	21	0.048	27	1.3
VC_A0974	3	61	0.049	27	0.4
VC_A1063	1	89	0.011	27	0.3
IG_VC_0178	4	76	0.053	26	0.3
IG_VC_0756	1	18	0.056	26	1.4
VC_0170	2	61	0.033	26	0.4
VC_0304	9	68	0.132	26	0.4
VC_0321	7	79	0.089	26	0.3
VC_0512	2	108	0.019	26	0.2
VC_0522	1	30	0.033	26	0.9
VC_0775	1	62	0.016	26	0.4
VC_1212	1	102	0.01	26	0.3
VC_1727	2	53	0.038	26	0.5
VC_1990	1	69	0.014	26	0.4
VC_2451	2	82	0.024	26	0.3
VC_2744	8	71	0.113	26	0.4
VC_A0036	1	57	0.018	26	0.5
VC_A0516	1	75	0.013	26	0.3
VC_A0803	2	66	0.03	26	0.4
IG_VC_0731	2	24	0.083	25	1
IG_VC_A1057	2	30	0.067	25	0.8
VC_0099	1	40	0.025	25	0.6
VC_0116	2	70	0.029	25	0.4
VC_0178	4	78	0.051	25	0.3
VC_1174	1	63	0.016	25	0.4
VC_1353	2	133	0.015	25	0.2
VC_1401	1	46	0.022	25	0.5
VC_1425	1	58	0.017	25	0.4
VC_1866	2	118	0.017	25	0.2
VC_2100	1	37	0.027	25	0.7
VC_2239	2	13	0.154	25	1.9
VC_2417	4	52	0.077	25	0.5
VC_2711	1	66	0.015	25	0.4
VC_0075	1	44	0.023	24	0.5
VC_0078	2	24	0.083	24	1
VC_0195	1	35	0.029	24	0.7
VC_0494	1	41	0.024	24	0.6
VC_0998	10	165	0.061	24	0.1
VC_1152	2	47	0.043	24	0.5
VC_1552	1	51	0.02	24	0.5
VC_1854	2	85	0.024	24	0.3
VC_1988	1	14	0.071	24	1.7
VC_2673	1	40	0.025	24	0.6
VC_2749	9	57	0.158	24	0.4
VC_A0165	2	101	0.02	24	0.2
VC_A0210	1	75	0.013	24	0.3
IG_VC_0538	2	30	0.067	23	0.8
VC_0018	1	25	0.04	23	0.9
VC_0412	1	49	0.02	23	0.5
VC_0476	2	62	0.032	23	0.4
VC_0795	2	69	0.029	23	0.3
VC_0896	1	45	0.022	23	0.5
VC_1499	1	89	0.011	23	0.3
VC_2338	1	128	0.008	23	0.2
VC_2616	2	54	0.037	23	0.4
IG_VC_0068	2	11	0.182	22	2
IG_VC_2561	1	4	0.25	22	5.5
VC_0023	1	15	0.067	22	1.5
VC_0068	2	53	0.038	22	0.4
VC_0190	1	72	0.014	22	0.3
VC_0362	5	77	0.065	22	0.3
VC_0391	1	56	0.018	22	0.4
VC_0399	2	62	0.032	22	0.4
VC_0676	1	58	0.017	22	0.4
VC_0703	10	115	0.087	22	0.2
VC_1117	1	37	0.027	22	0.6
VC_2191	10	78	0.128	22	0.3
VC_2232	1	62	0.016	22	0.4
VC_2705	2	82	0.024	22	0.3
VC_2716	2	71	0.028	22	0.3
VC_A0193	1	47	0.021	22	0.5
VC_A0779	1	48	0.021	22	0.5
IG_VC_0972	2	48	0.042	21	0.4
VC_0330	1	25	0.04	21	0.8
VC_0492	2	90	0.022	21	0.2
VC_0722	2	57	0.035	21	0.4
VC_0840	1	165	0.006	21	0.1
VC_0880	1	76	0.013	21	0.3
VC_1798	2	63	0.032	21	0.3
VC_2072	10	133	0.075	21	0.2
VC_2236	1	29	0.034	21	0.7
VC_2348	1	54	0.019	21	0.4
VC_2552	1	22	0.045	21	1
VC_A0148	2	169	0.012	21	0.1
IG_VC_0477	2	8	0.25	20	2.5
IG_VC_0644	1	6	0.167	20	3.3
IG_VC_0896	1	13	0.077	20	1.5
IG_VC_2142	1	8	0.125	20	2.5
IG_VC_2440	1	32	0.031	20	0.6
VC_0048	3	52	0.058	20	0.4
VC_0230	1	39	0.026	20	0.5
VC_0404	2	45	0.044	20	0.4
VC_0720	1	50	0.02	20	0.4
VC_1112	1	39	0.026	20	0.5
VC_1973	1	25	0.04	20	0.8
VC_2031	2	70	0.029	20	0.3
VC_2344	9	110	0.082	20	0.2
VC_2758	1	74	0.014	20	0.3
IG_VC_0151	1	16	0.062	19	1.2
IG_VC_0343	1	7	0.143	19	2.7
IG_VC_0429	1	8	0.125	19	2.4
IG_VC_0449	1	60	0.017	19	0.3
IG_VC_0674	1	4	0.25	19	4.8
IG_VC_0802	1	30	0.033	19	0.6
IG_VC_0810	1	16	0.062	19	1.2
IG_VC_0894	1	16	0.062	19	1.2
IG_VC_1101	1	38	0.026	19	0.5
IG_VC_1299	1	35	0.029	19	0.5
IG_VC_1572	1	36	0.028	19	0.5
IG_VC_1624	1	18	0.056	19	1.1
IG_VC_2115	1	4	0.25	19	4.8
IG_VC_2175	1	39	0.026	19	0.5
IG_VC_2264	1	6	0.167	19	3.2
IG_VC_A0044	1	17	0.059	19	1.1
IG_VC_A0142	1	18	0.056	19	1.1
IG_VC_A0523	1	18	0.056	19	1.1
IG_VC_A0925	1	20	0.05	19	0.9
VC_0159	1	18	0.056	19	1.1
VC_0729	1	5	0.2	19	3.8
VC_0779	1	30	0.033	19	0.6
VC_0914	2	142	0.014	19	0.1
VC_0930	2	158	0.013	19	0.1	rbmC
VC_1009	2	24	0.083	19	0.8
VC_1294	1	11	0.091	19	1.7
VC_1865	1	61	0.016	19	0.3
VC_2197	10	74	0.135	19	0.3
VC_2564	1	60	0.017	19	0.3
VC_2608	1	69	0.014	19	0.3
VC_A0254	1	76	0.013	19	0.2
VC_A0687	1	55	0.018	19	0.3
VC_A0975	2	91	0.022	19	0.2
IG_VC_0513	1	146	0.007	18	0.1
IG_VC_A0298	1	11	0.091	18	1.6
IG_VC_A0303	1	7	0.143	18	2.6
IG_VC_A0305	1	12	0.083	18	1.5
IG_VC_A0310	1	6	0.167	18	3
IG_VC_A0320	1	8	0.125	18	2.2
IG_VC_A0328	1	14	0.071	18	1.3
IG_VC_A0337	1	10	0.1	18	1.8
IG_VC_A0348	1	5	0.2	18	3.6
IG_VC_A0350	1	7	0.143	18	2.6
IG_VC_A0363	1	8	0.125	18	2.2
IG_VC_A0364	1	13	0.077	18	1.4
IG_VC_A0379	1	9	0.111	18	2
IG_VC_A0385	1	8	0.125	18	2.2
IG_VC_A0400	1	5	0.2	18	3.6
IG_VC_A0409	1	10	0.1	18	1.8
IG_VC_A0416	1	6	0.167	18	3
IG_VC_A0421	1	15	0.067	18	1.2
IG_VC_A0432	1	9	0.111	18	2
IG_VC_A0436	1	10	0.1	18	1.8
IG_VC_A0440	1	9	0.111	18	2
IG_VC_A0441	1	4	0.25	18	4.5
IG_VC_A0455	1	20	0.05	18	0.9
IG_VC_A0456	1	11	0.091	18	1.6
IG_VC_A0457	1	21	0.048	18	0.9
IG_VC_A0460	1	7	0.143	18	2.6
IG_VC_A0468	1	12	0.083	18	1.5
IG_VC_A0470	1	5	0.2	18	3.6
IG_VC_A0471	1	12	0.083	18	1.5
IG_VC_A0483	1	11	0.091	18	1.6
IG_VC_A0484	1	10	0.1	18	1.8
IG_VC_A0497	1	15	0.067	18	1.2
IG_VC_A0507	1	31	0.032	18	0.6
VC_0003	7	51	0.137	18	0.4
VC_0046	4	22	0.182	18	0.8
VC_0177	1	34	0.029	18	0.5
VC_0241	3	107	0.028	18	0.2
VC_0499	1	46	0.022	18	0.4
VC_0892	2	28	0.071	18	0.6
VC_1071	1	46	0.022	18	0.4
VC_1184	2	47	0.043	18	0.4
VC_1570	1	42	0.024	18	0.4
VC_1700	2	27	0.074	18	0.7
VC_2068	9	58	0.155	18	0.3
VC_2635	1	106	0.009	18	0.2
VC_2681	3	50	0.06	18	0.4
VC_A0354	1	40	0.025	18	0.5
VC_A0399	1	67	0.015	18	0.3
VC_A0431	1	16	0.062	18	1.1
VC_A0474	1	47	0.021	18	0.4
VC_A0491	1	38	0.026	18	0.5
VC_A0505	1	41	0.024	18	0.4
VC_A0828	1	45	0.022	18	0.4
VC_A0829	1	73	0.014	18	0.2
IG_VC_0601	1	5	0.2	17	3.4
IG_VC_0650	1	9	0.111	17	1.9
IG_VC_0965	1	12	0.083	17	1.4
IG_VC_1140	1	15	0.067	17	1.1
IG_VC_A0023	1	9	0.111	17	1.9
IG_VC_A0140	1	28	0.036	17	0.6
VC_0019	1	51	0.02	17	0.3
VC_0050	2	27	0.074	17	0.6
VC_0216	1	69	0.014	17	0.2
VC_0225	2	42	0.048	17	0.4
VC_0269	3	77	0.039	17	0.2
VC_0475	1	100	0.01	17	0.2
VC_1102	1	39	0.026	17	0.4
VC_1211	1	101	0.01	17	0.2
VC_2161	2	83	0.024	17	0.2
VC_2207	4	32	0.125	17	0.5
VC_2435	1	25	0.04	17	0.7
VC_2488	1	33	0.03	17	0.5
VC_2529	2	61	0.033	17	0.3
VC_2692	1	23	0.043	17	0.7
VC_A0157	2	122	0.016	17	0.1
VC_A0631	3	24	0.125	17	0.7
VC_A0813	1	65	0.015	17	0.3
IG_VC_0106	1	7	0.143	16	2.3
IG_VC_1758	1	53	0.019	16	0.3
IG_VC_1901	2	52	0.038	16	0.3
VC_0349	1	51	0.02	16	0.3
VC_0473	1	70	0.014	16	0.2
VC_0539	2	34	0.059	16	0.5
VC_0728	2	30	0.067	16	0.5
VC_0958	1	75	0.013	16	0.2
VC_1131	1	76	0.013	16	0.2
VC_1182	1	40	0.025	16	0.4
VC_1934	1	110	0.009	16	0.1
VC_2028	2	37	0.054	16	0.4
VC_2133	11	65	0.169	16	0.2
VC_2202	1	51	0.02	16	0.3
VC_2209	2	271	0.007	16	0.1
VC_2215	2	102	0.02	16	0.2
VC_2229	1	26	0.038	16	0.6
VC_2345	1	41	0.024	16	0.4
VC_2775	5	71	0.07	16	0.2
VC_A0850	1	34	0.029	16	0.5
VC_0081	1	34	0.029	15	0.4
VC_0278	1	65	0.015	15	0.2
VC_0371	1	53	0.019	15	0.3
VC_0398	2	98	0.02	15	0.2
VC_0431	1	29	0.034	15	0.5
VC_0991	1	81	0.012	15	0.2
VC_1087	1	75	0.013	15	0.2
VC_1313	1	65	0.015	15	0.2
VC_1722	2	32	0.062	15	0.5
VC_1861	2	42	0.048	15	0.4
VC_2036	1	43	0.023	15	0.3
VC_2043	1	89	0.011	15	0.2
VC_2069	8	86	0.093	15	0.2
VC_2156	6	45	0.133	15	0.3
VC_2262	12	111	0.108	15	0.1
VC_2319	1	77	0.013	15	0.2
VC_2423	3	36	0.083	15	0.4
VC_2483	1	80	0.013	15	0.2
VC_A0700	2	142	0.014	15	0.1
VC_A0914	2	45	0.044	15	0.3
VC_A1023	1	101	0.01	15	0.1
VC_A1039	1	28	0.036	15	0.5
VC_A1105	2	34	0.059	15	0.4
IG_VC_0099	2	16	0.125	14	0.9
IG_VC_0269	1	29	0.034	14	0.5
IG_VC_2673	1	4	0.25	14	3.5
IG_VC_A1006	1	8	0.125	14	1.8
VC_0113	1	34	0.029	14	0.4
VC_0130	3	87	0.034	14	0.2
VC_0180	3	123	0.024	14	0.1
VC_0242	6	109	0.055	14	0.1
VC_0423	1	49	0.02	14	0.3
VC_1260	1	45	0.022	14	0.3
VC_1321	1	173	0.006	14	0.1
VC_1539	1	41	0.024	14	0.3
VC_1764	1	113	0.009	14	0.1
VC_1777	1	78	0.013	14	0.2
VC_1976	1	47	0.021	14	0.3
VC_2033	1	128	0.008	14	0.1
VC_2163	1	12	0.083	14	1.2
VC_2222	1	24	0.042	14	0.6
VC_2283	1	55	0.018	14	0.3
VC_A0325	2	14	0.143	14	1
VC_A0375	2	14	0.143	14	1
VC_A0781	1	92	0.011	14	0.2
VC_A0960	1	86	0.012	14	0.2
VC_A1062	1	59	0.017	14	0.2
IG_VC_0912	1	25	0.04	13	0.5
IG_VC_A0533	1	20	0.05	13	0.7
VC_0040	1	38	0.026	13	0.3
VC_0074	1	12	0.083	13	1.1
VC_0157	1	92	0.011	13	0.1
VC_0171	2	68	0.029	13	0.2
VC_0464	1	28	0.036	13	0.5
VC_0603	1	100	0.01	13	0.1
VC_0630	2	77	0.026	13	0.2
VC_0778	1	43	0.023	13	0.3
VC_0884	1	32	0.031	13	0.4
VC_1494	1	119	0.008	13	0.1
VC_1689	1	22	0.045	13	0.6
VC_2214	1	62	0.016	13	0.2
VC_2227	1	28	0.036	13	0.5
VC_2349	1	52	0.019	13	0.2
VC_2534	3	43	0.07	13	0.3
VC_2557	1	25	0.04	13	0.5
VC_2598	1	31	0.032	13	0.4
VC_2637	1	42	0.024	13	0.3
VC_2699	2	50	0.04	13	0.3
VC_A0211	1	90	0.011	13	0.1
VC_A0607	1	16	0.062	13	0.8
VC_A0681	2	55	0.036	13	0.2
IG_VC_2261	1	20	0.05	12	0.6
IG_VC_2269	1	13	0.077	12	0.9
IG_VC_A0449	1	5	0.2	12	2.4
IG_VC_A0895	1	5	0.2	12	2.4
IG_VC_A0919	1	37	0.027	12	0.3
VC_0425	1	27	0.037	12	0.4
VC_0556	3	65	0.046	12	0.2
VC_0632	2	87	0.023	12	0.1
VC_0674	1	45	0.022	12	0.3
VC_0899	1	67	0.015	12	0.2
VC_1033	1	83	0.012	12	0.1
VC_1388	1	31	0.032	12	0.4
VC_1391	1	56	0.018	12	0.2
VC_2140	6	63	0.095	12	0.2
VC_2350	1	33	0.03	12	0.4
VC_2356	1	69	0.014	12	0.2
VC_2441	1	27	0.037	12	0.4
VC_2536	2	16	0.125	12	0.8
VC_2627	7	59	0.119	12	0.2
VC_A0100	1	19	0.053	12	0.6
VC_A0146	1	78	0.013	12	0.2
VC_A0311	2	21	0.095	12	0.6
VC_A0385	2	21	0.095	12	0.6
VC_A0511	1	100	0.01	12	0.1
VC_A0576	1	182	0.005	12	0.1
VC_A0795	1	72	0.014	12	0.2
VC_A0863	2	122	0.016	12	0.1
VC_A1034	1	77	0.013	12	0.2
IG_VC_1334	1	11	0.091	11	1
IG_VC_2200	1	1	1	11	11
IG_VC_2640	1	7	0.143	11	1.6
IG_VC_2773	1	3	0.333	11	3.7
VC_0041	2	21	0.095	11	0.5
VC_0132	2	63	0.032	11	0.2
VC_0179	2	78	0.026	11	0.1
VC_0243	3	97	0.031	11	0.1
VC_0252	1	43	0.023	11	0.3
VC_0254	1	64	0.016	11	0.2
VC_0257	2	59	0.034	11	0.2
VC_0302	2	45	0.044	11	0.2
VC_0409	1	41	0.024	11	0.3
VC_0422	5	57	0.088	11	0.2
VC_0677	1	50	0.02	11	0.2
VC_0744	1	38	0.026	11	0.3
VC_0783	2	92	0.022	11	0.1
VC_0995	1	73	0.014	11	0.2
VC_1164	2	27	0.074	11	0.4
VC_1478	2	59	0.034	11	0.2
VC_1789	2	59	0.034	11	0.2
VC_1799	1	72	0.014	11	0.2
VC_2194	3	35	0.086	11	0.3
VC_2554	2	53	0.038	11	0.2
VC_2579	1	30	0.033	11	0.4
VC_2593	1	45	0.022	11	0.2
VC_2694	1	35	0.029	11	0.3
VC_A0247	1	33	0.03	11	0.3
VC_A0371	2	59	0.034	11	0.2
VC_A0508	2	59	0.034	11	0.2
VC_A0628	1	201	0.005	11	0.1
VC_A0791	2	59	0.034	11	0.2
VC_A0872	1	81	0.012	11	0.1
VC_A1027	1	45	0.022	11	0.2
IG_VC_0298	2	21	0.095	10	0.5
IG_VC_0620	1	8	0.125	10	1.2
IG_VC_0688	1	17	0.059	10	0.6
IG_VC_1182	1	12	0.083	10	0.8
IG_VC_1622	1	1	1	10	10
IG_VC_1776	1	15	0.067	10	0.7
IG_VC_2184	2	8	0.25	10	1.2
IG_VC_2507	1	23	0.043	10	0.4
VC_0154	1	47	0.021	10	0.2
VC_0396	1	34	0.029	10	0.3
VC_0403	1	27	0.037	10	0.4
VC_0441	1	40	0.025	10	0.2
VC_0534	1	35	0.029	10	0.3
VC_0619	2	49	0.041	10	0.2
VC_0667	1	53	0.019	10	0.2
VC_0697	1	25	0.04	10	0.4
VC_1067	8	127	0.063	10	0.1
VC_1085	1	58	0.017	10	0.2
VC_1279	1	78	0.013	10	0.1
VC_1392	1	52	0.019	10	0.2
VC_1492	2	219	0.009	10	0
VC_1521	1	81	0.012	10	0.1
VC_1605	1	69	0.014	10	0.1
VC_1650	1	137	0.007	10	0.1
VC_1721	1	50	0.02	10	0.2
VC_1749	1	71	0.014	10	0.1
VC_2006	1	57	0.018	10	0.2
VC_2120	5	38	0.132	10	0.3
VC_2134	3	13	0.231	10	0.8
VC_2341	1	86	0.012	10	0.1
VC_2346	1	32	0.031	10	0.3
VC_2490	1	77	0.013	10	0.1
VC_2621	1	108	0.009	10	0.1
VC_A0030	1	41	0.024	10	0.2
VC_A0243	1	28	0.036	10	0.4
VC_A0396	1	59	0.017	10	0.2
VC_A0454	1	83	0.012	10	0.1
VC_A0552	1	104	0.01	10	0.1
VC_A0756	1	47	0.021	10	0.2
VC_A1112	2	88	0.023	10	0.1
IG_VC_0101	1	6	0.167	9	1.5
IG_VC_0387	1	12	0.083	9	0.8
IG_VC_0424	1	47	0.021	9	0.2
IG_VC_0430	2	13	0.154	9	0.7
IG_VC_1944	1	17	0.059	9	0.5
IG_VC_2735	1	17	0.059	9	0.5
VC_0058	1	30	0.033	9	0.3
VC_0095	1	32	0.031	9	0.3
VC_0185	1	90	0.011	9	0.1
VC_0206	1	33	0.03	9	0.3
VC_0274	4	37	0.108	9	0.2
VC_0281	1	86	0.012	9	0.1
VC_0284	1	88	0.011	9	0.1
VC_0390	2	157	0.013	9	0.1
VC_0582	1	46	0.022	9	0.2
VC_0653	6	81	0.074	9	0.1
VC_0841	1	54	0.019	9	0.2
VC_0843	1	75	0.013	9	0.1
VC_0900	6	70	0.086	9	0.1
VC_1074	1	38	0.026	9	0.2
VC_1091	1	69	0.014	9	0.1
VC_1214	2	71	0.028	9	0.1
VC_1284	1	56	0.018	9	0.2
VC_1295	2	64	0.031	9	0.1
VC_1307	1	42	0.024	9	0.2
VC_1428	4	52	0.077	9	0.2
VC_1448	1	106	0.009	9	0.1
VC_1563	1	43	0.023	9	0.2
VC_1590	1	81	0.012	9	0.1
VC_1719	1	31	0.032	9	0.3
VC_1771	1	246	0.004	9	0
VC_1859	1	72	0.014	9	0.1
VC_1936	1	55	0.018	9	0.2
VC_2062	5	53	0.094	9	0.2
VC_2333	1	48	0.021	9	0.2
VC_2434	1	19	0.053	9	0.5
VC_2618	1	44	0.023	9	0.2
VC_2748	2	38	0.053	9	0.2
VC_A0119	1	38	0.026	9	0.2
VC_A0239	1	33	0.03	9	0.3
VC_A0331	1	59	0.017	9	0.2
VC_A0473	1	25	0.04	9	0.4
VC_A0653	1	58	0.017	9	0.2
VC_A0665	1	79	0.013	9	0.1
VC_A0856	1	33	0.03	9	0.3
VC_A1077	1	72	0.014	9	0.1
IG_VC_2715	1	11	0.091	8	0.7
IG_VC_A0178	1	17	0.059	8	0.5
IG_VC_A0805	1	21	0.048	8	0.4
IG_VC_A0971	1	32	0.031	8	0.2
IG_chrm1end	1	6	0.167	8	1.3
VC_0071	1	23	0.043	8	0.3
VC_0076	2	15	0.133	8	0.5
VC_0128	1	38	0.026	8	0.2
VC_0135	3	55	0.055	8	0.1
VC_0251	4	162	0.025	8	0
VC_0287	1	11	0.091	8	0.7
VC_0305	5	53	0.094	8	0.2
VC_0338	1	56	0.018	8	0.1
VC_0379	1	36	0.028	8	0.2
VC_0743	1	89	0.011	8	0.1
VC_0798	1	21	0.048	8	0.4
VC_1207	1	52	0.019	8	0.2
VC_1289	1	75	0.013	8	0.1
VC_1360	1	60	0.017	8	0.1
VC_1398	1	22	0.045	8	0.4
VC_1433	1	43	0.023	8	0.2
VC_1454	1	56	0.018	8	0.1
VC_1463	1	56	0.018	8	0.1
VC_1663	1	13	0.077	8	0.6
VC_1824	1	31	0.032	8	0.3
VC_1951	1	48	0.021	8	0.2
VC_1998	1	22	0.045	8	0.4
VC_2014	1	28	0.036	8	0.3
VC_2137	4	54	0.074	8	0.1
VC_2179	1	38	0.026	8	0.2
VC_2195	3	33	0.091	8	0.2
VC_2208	5	51	0.098	8	0.2
VC_2257	1	18	0.056	8	0.4
VC_2312	3	42	0.071	8	0.2
VC_2432	1	26	0.038	8	0.3
VC_2501	1	65	0.015	8	0.1
VC_2718	1	28	0.036	8	0.3
VC_A0063	1	85	0.012	8	0.1
VC_A0108	1	52	0.019	8	0.2
VC_A0120	1	147	0.007	8	0.1
VC_A0141	1	66	0.015	8	0.1
VC_A0382	1	21	0.048	8	0.4
VC_A0519	2	37	0.054	8	0.2
VC_A0522	1	115	0.009	8	0.1
VC_A0575	1	41	0.024	8	0.2
VC_A0646	1	73	0.014	8	0.1
VC_A0669	1	69	0.014	8	0.1
VC_A0688	2	72	0.028	8	0.1
VC_A0865	1	94	0.011	8	0.1
VC_A0896	2	63	0.032	8	0.1
VC_A0980	1	40	0.025	8	0.2
IG_VC_0047	1	4	0.25	7	1.8
IG_VC_0056	1	3	0.333	7	2.3
IG_VC_0374	1	20	0.05	7	0.3
IG_VC_0548	1	7	0.143	7	1
IG_VC_1973	1	5	0.2	7	1.4
IG_VC_2378	1	11	0.091	7	0.6
IG_VC_2642	1	13	0.077	7	0.5
IG_VC_A0506	1	7	0.143	7	1
VC_0054	1	23	0.043	7	0.3
VC_0207	1	51	0.02	7	0.1
VC_0264	1	41	0.024	7	0.2
VC_0430	5	49	0.102	7	0.1
VC_0498	1	20	0.05	7	0.3
VC_0612	3	98	0.031	7	0.1
VC_0616	1	37	0.027	7	0.2
VC_0806	1	56	0.018	7	0.1
VC_0835	1	120	0.008	7	0.1
VC_0863	1	68	0.015	7	0.1
VC_0901	1	131	0.008	7	0.1
VC_0904	1	28	0.036	7	0.2
VC_1265	1	50	0.02	7	0.1
VC_1495	1	40	0.025	7	0.2
VC_1815	1	27	0.037	7	0.3
VC_1845	1	47	0.021	7	0.1
VC_1863	1	44	0.023	7	0.2
VC_1902	1	26	0.038	7	0.3
VC_1919	1	13	0.077	7	0.5
VC_1923	1	41	0.024	7	0.2
VC_1924	1	16	0.062	7	0.4
VC_1927	1	60	0.017	7	0.1
VC_2128	4	58	0.069	7	0.1
VC_2131	3	25	0.12	7	0.3
VC_2199	4	23	0.174	7	0.3
VC_2316	1	48	0.021	7	0.1
VC_2384	1	33	0.03	7	0.2
VC_2476	1	20	0.05	7	0.3
VC_2756	3	68	0.044	7	0.1
VC_A0014	1	76	0.013	7	0.1
VC_A0530	1	130	0.008	7	0.1
VC_A0759	1	31	0.032	7	0.2
VC_A0808	1	25	0.04	7	0.3
VC_A0830	1	41	0.024	7	0.2
VC_A1046	1	45	0.022	7	0.2
IG_VC_0280	1	10	0.1	6	0.6
IG_VC_0917	1	31	0.032	6	0.2
IG_VC_0998	1	7	0.143	6	0.9
IG_VC_1210	1	12	0.083	6	0.5
IG_VC_2323	1	14	0.071	6	0.4
IG_VC_2622	1	15	0.067	6	0.4
IG_VC_2670	1	16	0.062	6	0.4
IG_VC_2758	1	13	0.077	6	0.5
IG_VC_A0022	1	7	0.143	6	0.9
IG_VC_A0477	1	10	0.1	6	0.6
IG_VC_A0832	1	21	0.048	6	0.3
VC_0186	2	45	0.044	6	0.1
VC_0308	1	43	0.023	6	0.1
VC_0602	1	90	0.011	6	0.1
VC_0609	1	97	0.01	6	0.1
VC_0687	1	66	0.015	6	0.1
VC_0690	1	30	0.033	6	0.2
VC_0788	1	15	0.067	6	0.4
VC_0810	1	42	0.024	6	0.1
VC_0965	4	78	0.051	6	0.1
VC_1004	1	71	0.014	6	0.1
VC_1020	1	12	0.083	6	0.5
VC_1053	1	20	0.05	6	0.3
VC_1088	2	82	0.024	6	0.1
VC_1097	4	87	0.046	6	0.1
VC_1219	1	40	0.025	6	0.1
VC_1244	1	39	0.026	6	0.2
VC_1267	1	42	0.024	6	0.1
VC_1345	1	37	0.027	6	0.2
VC_1684	2	27	0.074	6	0.2
VC_1693	1	34	0.029	6	0.2
VC_1879	2	111	0.018	6	0.1
VC_1903	3	119	0.025	6	0.1
VC_1983	1	77	0.013	6	0.1
VC_2030	1	121	0.008	6	0
VC_2059	4	24	0.167	6	0.2
VC_2063	3	112	0.027	6	0.1
VC_2118	1	31	0.032	6	0.2
VC_2130	5	45	0.111	6	0.1
VC_2171	2	45	0.044	6	0.1
VC_2190	6	60	0.1	6	0.1
VC_2302	1	31	0.032	6	0.2
VC_2464	1	20	0.05	6	0.3
VC_2603	1	29	0.034	6	0.2
VC_2693	1	55	0.018	6	0.1
VC_2700	1	149	0.007	6	0
VC_A0008	1	79	0.013	6	0.1
VC_A0027	1	111	0.009	6	0.1
VC_A0159	1	46	0.022	6	0.1
VC_A0213	1	69	0.014	6	0.1
VC_A0560	2	73	0.027	6	0.1
VC_A0580	1	32	0.031	6	0.2
VC_A0644	1	68	0.015	6	0.1
VC_A0904	1	65	0.015	6	0.1
VC_A1055	1	44	0.023	6	0.1
VC_A1073	1	105	0.01	6	0.1
VC_A1091	1	37	0.027	6	0.2
IG_VC_0059	1	21	0.048	5	0.2
IG_VC_0071	1	8	0.125	5	0.6
IG_VC_1034	2	31	0.065	5	0.2
IG_VC_1069	1	6	0.167	5	0.8
IG_VC_2070	1	20	0.05	5	0.2
IG_VC_2357	1	28	0.036	5	0.2
IG_VC_A0287	1	21	0.048	5	0.2
VC_0063	1	38	0.026	5	0.1
VC_0066	1	54	0.019	5	0.1
VC_0082	1	56	0.018	5	0.1
VC_0114	1	17	0.059	5	0.3
VC_0173	1	39	0.026	5	0.1
VC_0183	1	152	0.007	5	0
VC_0260	3	114	0.026	5	0
VC_0628	1	39	0.026	5	0.1
VC_0700	1	103	0.01	5	0
VC_0704	1	60	0.017	5	0.1
VC_0857	1	29	0.034	5	0.2
VC_0962	1	54	0.019	5	0.1
VC_0988	1	82	0.012	5	0.1
VC_1006	1	33	0.03	5	0.2
VC_1133	1	49	0.02	5	0.1
VC_1271	1	36	0.028	5	0.1
VC_1625	1	111	0.009	5	0
VC_1768	2	86	0.023	5	0.1
VC_1871	1	22	0.045	5	0.2
VC_1896	2	85	0.024	5	0.1
VC_1905	1	73	0.014	5	0.1
VC_2123	2	35	0.057	5	0.1
VC_2138	3	22	0.136	5	0.2
VC_2192	4	34	0.118	5	0.1
VC_2334	1	34	0.029	5	0.1
VC_2437	2	55	0.036	5	0.1
VC_2440	2	63	0.032	5	0.1
VC_2492	1	49	0.02	5	0.1
VC_2659	1	15	0.067	5	0.3
VC_2677	4	30	0.133	5	0.2
VC_A0011	1	104	0.01	5	0
VC_A0117	1	50	0.02	5	0.1
VC_A0205	1	57	0.018	5	0.1
VC_A0244	1	28	0.036	5	0.2
VC_A0253	1	33	0.03	5	0.2
VC_A0293	1	41	0.024	5	0.1
VC_A0310	1	22	0.045	5	0.2
VC_A0365	1	28	0.036	5	0.2
VC_A0419	1	70	0.014	5	0.1
VC_A0709	2	103	0.019	5	0
VC_A0767	4	33	0.121	5	0.2
VC_A0867	1	51	0.02	5	0.1
VC_A0899	1	3	0.333	5	1.7
VC_A0939	1	41	0.024	5	0.1
VC_A0987	2	71	0.028	5	0.1
VC_A1007	1	4	0.25	5	1.2
IG_VC_0077	1	4	0.25	4	1
IG_VC_0191	1	29	0.034	4	0.1
IG_VC_0304	1	12	0.083	4	0.3
IG_VC_0490	1	69	0.014	4	0.1
IG_VC_0511	1	21	0.048	4	0.2
IG_VC_0560	1	19	0.053	4	0.2
IG_VC_0630	1	5	0.2	4	0.8
IG_VC_0940	1	13	0.077	4	0.3
IG_VC_1362	1	11	0.091	4	0.4
IG_VC_1372	1	34	0.029	4	0.1
IG_VC_1393	1	9	0.111	4	0.4
IG_VC_1563	1	10	0.1	4	0.4
IG_VC_1637	1	18	0.056	4	0.2
IG_VC_1701	1	7	0.143	4	0.6
IG_VC_1823	2	14	0.143	4	0.3
IG_VC_2009	1	2	0.5	4	2
IG_VC_2032	1	5	0.2	4	0.8
IG_VC_2696	1	4	0.25	4	1
IG_VC_A0004	1	22	0.045	4	0.2
IG_VC_A0552	1	15	0.067	4	0.3
IG_VC_A0603	1	6	0.167	4	0.7
VC_0010	2	36	0.056	4	0.1
VC_0029	1	38	0.026	4	0.1
VC_0201	1	22	0.045	4	0.2
VC_0249	3	128	0.023	4	0
VC_0250	2	72	0.028	4	0.1
VC_0267	1	32	0.031	4	0.1
VC_0298	1	88	0.011	4	0
VC_0480	1	41	0.024	4	0.1
VC_0523	1	22	0.045	4	0.2
VC_0547	1	60	0.017	4	0.1
VC_0725	1	74	0.014	4	0.1
VC_0727	1	27	0.037	4	0.1
VC_0761	4	24	0.167	4	0.2
VC_0791	1	56	0.018	4	0.1
VC_0821	1	117	0.009	4	0
VC_1367	1	119	0.008	4	0
VC_1660	1	93	0.011	4	0
VC_1675	1	42	0.024	4	0.1
VC_1757	1	119	0.008	4	0
VC_2005	3	19	0.158	4	0.2
VC_2039	1	52	0.019	4	0.1
VC_2073	1	16	0.062	4	0.2
VC_2077	1	121	0.008	4	0
VC_2081	4	48	0.083	4	0.1
VC_2125	2	16	0.125	4	0.2
VC_2126	2	33	0.061	4	0.1
VC_2135	3	67	0.045	4	0.1
VC_2142	2	44	0.045	4	0.1
VC_2185	1	46	0.022	4	0.1
VC_2203	2	32	0.062	4	0.1
VC_2622	1	40	0.025	4	0.1
VC_2624	2	31	0.065	4	0.1
VC_2628	2	43	0.047	4	0.1
VC_2669	1	12	0.083	4	0.3
VC_A0268	1	80	0.013	4	0.1
VC_A0838	1	13	0.077	4	0.3
VC_A0920	2	29	0.069	4	0.1
VC_A0997	1	26	0.038	4	0.2
VC_A1036	1	45	0.022	4	0.1
VC_A1082	1	58	0.017	4	0.1
VC_A1090	1	29	0.034	4	0.1
IG_VC_0152	1	16	0.062	3	0.2
IG_VC_0347	1	13	0.077	3	0.2
IG_VC_0365	1	6	0.167	3	0.5
IG_VC_0493	1	18	0.056	3	0.2
IG_VC_0504	1	18	0.056	3	0.2
IG_VC_0641	2	28	0.071	3	0.1
IG_VC_0668	1	7	0.143	3	0.4
IG_VC_1273	1	29	0.034	3	0.1
IG_VC_1864	1	12	0.083	3	0.2
IG_VC_2503	2	10	0.2	3	0.3
VC_0136	1	37	0.027	3	0.1
VC_0166	1	29	0.034	3	0.1
VC_0174	2	33	0.061	3	0.1
VC_0224	3	34	0.088	3	0.1
VC_0239	1	94	0.011	3	0
VC_0259	3	103	0.029	3	0
VC_0345	3	89	0.034	3	0
VC_0348	1	62	0.016	3	0
VC_0474	1	30	0.033	3	0.1
VC_0558	1	60	0.017	3	0.1
VC_0647	1	68	0.015	3	0
VC_0654	1	23	0.043	3	0.1
VC_0909	1	39	0.026	3	0.1
VC_0966	1	11	0.091	3	0.3
VC_0999	1	34	0.029	3	0.1
VC_1034	1	24	0.042	3	0.1
VC_1042	1	64	0.016	3	0
VC_1098	2	40	0.05	3	0.1
VC_1348	3	67	0.045	3	0
VC_1588	1	38	0.026	3	0.1
VC_1643	1	67	0.015	3	0
VC_1681	2	52	0.038	3	0.1
VC_1791	2	59	0.034	3	0.1
VC_1831	2	123	0.016	3	0
VC_1872	1	83	0.012	3	0
VC_1950	1	91	0.011	3	0
VC_1952	1	115	0.009	3	0
VC_1965	2	33	0.061	3	0.1
VC_1967	1	119	0.008	3	0
VC_1979	1	44	0.023	3	0.1
VC_2058	2	13	0.154	3	0.2
VC_2066	3	37	0.081	3	0.1
VC_2085	1	49	0.02	3	0.1
VC_2121	3	33	0.091	3	0.1
VC_2127	2	18	0.111	3	0.2
VC_2164	3	67	0.045	3	0
VC_2198	1	25	0.04	3	0.1
VC_2200	2	25	0.08	3	0.1
VC_2360	1	39	0.026	3	0.1
VC_2425	2	56	0.036	3	0.1
VC_2433	1	29	0.034	3	0.1
VC_2465	3	32	0.094	3	0.1
VC_2503	1	105	0.01	3	0
VC_2561	1	26	0.038	3	0.1
VC_2629	2	34	0.059	3	0.1
VC_2630	1	73	0.014	3	0
VC_A0153	1	25	0.04	3	0.1
VC_A0231	1	39	0.026	3	0.1
VC_A0537	1	23	0.043	3	0.1
VC_A0603	1	38	0.026	3	0.1
VC_A0662	1	28	0.036	3	0.1
VC_A0738	1	63	0.016	3	0
VC_A0956	1	50	0.02	3	0.1
IG_VC_0188	1	22	0.045	2	0.1
IG_VC_0397	1	20	0.05	2	0.1
IG_VC_0709	1	12	0.083	2	0.2
IG_VC_0747	1	9	0.111	2	0.2
IG_VC_0890	1	2	0.5	2	1
IG_VC_0995	2	35	0.057	2	0.1
IG_VC_1471	1	74	0.014	2	0
IG_VC_1479	1	73	0.014	2	0
IG_VC_1722	1	26	0.038	2	0.1
IG_VC_1797	1	59	0.017	2	0
IG_VC_2042	1	34	0.029	2	0.1
IG_VC_2134	1	2	0.5	2	1
IG_VC_2138	1	15	0.067	2	0.1
IG_VC_2145	1	7	0.143	2	0.3
IG_VC_2209	1	6	0.167	2	0.3
IG_VC_2358	1	6	0.167	2	0.3
IG_VC_2521	2	4	0.5	2	0.5
IG_VC_2552	1	3	0.333	2	0.7
IG_VC_2747	1	15	0.067	2	0.1
IG_VC_A0107	2	39	0.051	2	0.1
IG_VC_A0767	2	5	0.4	2	0.4
IG_VC_A0899	1	13	0.077	2	0.2
IG_VC_A0910	1	18	0.056	2	0.1
VC_0093	1	87	0.011	2	0
VC_0118	1	36	0.028	2	0.1
VC_0120	1	40	0.025	2	0.1
VC_0217	2	24	0.083	2	0.1
VC_0234	2	60	0.033	2	0
VC_0235	1	49	0.02	2	0
VC_0240	1	50	0.02	2	0
VC_0244	2	86	0.023	2	0
VC_0263	2	29	0.069	2	0.1
VC_0355	1	33	0.03	2	0.1
VC_0356	1	18	0.056	2	0.1
VC_0442	1	14	0.071	2	0.1
VC_0468	2	43	0.047	2	0
VC_0531	1	34	0.029	2	0.1
VC_0554	1	119	0.008	2	0
VC_0663	2	53	0.038	2	0
VC_0666	1	17	0.059	2	0.1
VC_0832	1	52	0.019	2	0
VC_1086	2	81	0.025	2	0
VC_1093	1	42	0.024	2	0
VC_1231	1	34	0.029	2	0.1
VC_1373	1	106	0.009	2	0
VC_1384	1	23	0.043	2	0.1
VC_1413	1	81	0.012	2	0
VC_1424	2	55	0.036	2	0
VC_1426	2	39	0.051	2	0.1
VC_1466	1	9	0.111	2	0.2
VC_1472	1	7	0.143	2	0.3
VC_1516	1	83	0.012	2	0
VC_1598	1	49	0.02	2	0
VC_1609	1	54	0.019	2	0
VC_1619.1	1	254	0.004	2	0
VC_1627	2	65	0.031	2	0
VC_1669	1	61	0.016	2	0
VC_1673	1	133	0.008	2	0
VC_1783	1	53	0.019	2	0
VC_1800	1	42	0.024	2	0
VC_1900	1	43	0.023	2	0
VC_1901	1	79	0.013	2	0
VC_2003	1	41	0.024	2	0
VC_2136	2	32	0.062	2	0.1
VC_2139	2	17	0.118	2	0.1
VC_2174	1	80	0.013	2	0
VC_2184	1	25	0.04	2	0.1
VC_2196	1	26	0.038	2	0.1
VC_2205	2	19	0.105	2	0.1
VC_2228	1	6	0.167	2	0.3
VC_2242	1	42	0.024	2	0
VC_2260	1	42	0.024	2	0
VC_2273	1	47	0.021	2	0
VC_2310	1	10	0.1	2	0.2
VC_2415	1	29	0.034	2	0.1
VC_2442	2	59	0.034	2	0
VC_2518	1	16	0.062	2	0.1
VC_2523	1	34	0.029	2	0.1
VC_2671	1	62	0.016	2	0
VC_2689	1	43	0.023	2	0
VC_2698	1	62	0.016	2	0
VC_2746	2	63	0.032	2	0
VC_A0002	1	83	0.012	2	0
VC_A0131	1	34	0.029	2	0.1
VC_A0183	2	61	0.033	2	0
VC_A0199	1	163	0.006	2	0
VC_A0269	1	72	0.014	2	0
VC_A0559	1	60	0.017	2	0
VC_A0634	1	26	0.038	2	0.1
VC_A0683	1	66	0.015	2	0
VC_A0721	1	9	0.111	2	0.2
VC_A0805	1	66	0.015	2	0
VC_A0871	1	89	0.011	2	0
VC_A0930	1	39	0.026	2	0.1
VC_A1045	1	97	0.01	2	0
VC_A1050	1	37	0.027	2	0.1
IG_VC_0121	1	11	0.091	1	0.1
IG_VC_0265	1	12	0.083	1	0.1
IG_VC_0306	1	11	0.091	1	0.1
IG_VC_0392	1	17	0.059	1	0.1
IG_VC_0453	1	13	0.077	1	0.1
IG_VC_0501	1	37	0.027	1	0
IG_VC_0505	1	4	0.25	1	0.2
IG_VC_0654	1	23	0.043	1	0
IG_VC_0660	1	8	0.125	1	0.1
IG_VC_0866	1	12	0.083	1	0.1
IG_VC_1845	1	34	0.029	1	0
IG_VC_1900	1	14	0.071	1	0.1
IG_VC_2196	1	3	0.333	1	0.3
IG_VC_2395	1	23	0.043	1	0
IG_VC_2436	1	21	0.048	1	0
IG_VC_2468	1	31	0.032	1	0
IG_VC_A0002	1	54	0.019	1	0
IG_VC_A0331	1	6	0.167	1	0.2
IG_VC_A0978	1	11	0.091	1	0.1
VC_0005	1	16	0.062	1	0.1
VC_0014	1	51	0.02	1	0
VC_0015	1	100	0.01	1	0
VC_0022	1	34	0.029	1	0
VC_0027	1	54	0.019	1	0
VC_0035	1	42	0.024	1	0
VC_0056	1	43	0.023	1	0
VC_0062	1	75	0.013	1	0
VC_0064	1	11	0.091	1	0.1
VC_0085	1	72	0.014	1	0
VC_0124	1	12	0.083	1	0.1
VC_0126	1	30	0.033	1	0
VC_0164	1	136	0.007	1	0
VC_0165	1	55	0.018	1	0
VC_0182	1	36	0.028	1	0
VC_0203	1	62	0.016	1	0
VC_0261	1	8	0.125	1	0.1
VC_0282	1	52	0.019	1	0
VC_0300	1	53	0.019	1	0
VC_0334	1	47	0.021	1	0
VC_0337	1	41	0.024	1	0
VC_0376	1	53	0.019	1	0
VC_0377	1	14	0.071	1	0.1
VC_0383	1	8	0.125	1	0.1
VC_0389	1	71	0.014	1	0
VC_0393	1	107	0.009	1	0
VC_0418	1	23	0.043	1	0
VC_0458	1	10	0.1	1	0.1
VC_0482	1	46	0.022	1	0
VC_0508	1	29	0.034	1	0
VC_0564	1	21	0.048	1	0
VC_0587	1	73	0.014	1	0
VC_0626	1	45	0.022	1	0
VC_0640	1	15	0.067	1	0.1
VC_0648	1	50	0.02	1	0
VC_0651	1	44	0.023	1	0
VC_0659	1	62	0.016	1	0
VC_0709	1	35	0.029	1	0
VC_0760	1	59	0.017	1	0
VC_0820	1	300	0.003	1	0
VC_0912	1	3	0.333	1	0.3
VC_1050	1	46	0.022	1	0
VC_1249	1	24	0.042	1	0
VC_1262	1	6	0.167	1	0.2
VC_1297	1	57	0.018	1	0
VC_1314	1	71	0.014	1	0
VC_1349	1	191	0.005	1	0
VC_1350	1	21	0.048	1	0
VC_1403	1	78	0.013	1	0
VC_1427	1	53	0.019	1	0
VC_1469	1	70	0.014	1	0
VC_1475	1	70	0.014	1	0
VC_1503	1	46	0.022	1	0
VC_1533	1	39	0.026	1	0
VC_1549	1	65	0.015	1	0
VC_1581	1	71	0.014	1	0
VC_1595	1	40	0.025	1	0
VC_1596	1	48	0.021	1	0
VC_1621	1	71	0.014	1	0
VC_1629	1	120	0.008	1	0
VC_1741	1	38	0.026	1	0
VC_1795	1	18	0.056	1	0.1
VC_1797	1	26	0.038	1	0
VC_1833	1	50	0.02	1	0
VC_1850	1	38	0.026	1	0
VC_1885	1	18	0.056	1	0.1
VC_1886	1	135	0.007	1	0
VC_1918	1	83	0.012	1	0
VC_1942	1	42	0.024	1	0
VC_1984	1	50	0.02	1	0
VC_2012	1	87	0.011	1	0
VC_2067	1	48	0.021	1	0
VC_2096	1	21	0.048	1	0
VC_2122	1	13	0.077	1	0.1
VC_2124	1	14	0.071	1	0.1
VC_2143	1	43	0.023	1	0
VC_2181	1	25	0.04	1	0
VC_2187	1	44	0.023	1	0
VC_2193	1	35	0.029	1	0
VC_2206	1	22	0.045	1	0
VC_2223	1	49	0.02	1	0
VC_2247	1	41	0.024	1	0
VC_2309	1	42	0.024	1	0
VC_2352	1	56	0.018	1	0
VC_2376	1	145	0.007	1	0
VC_2400	1	59	0.017	1	0
VC_2420	1	26	0.038	1	0
VC_2456	1	64	0.016	1	0
VC_2485	1	29	0.034	1	0
VC_2512	1	13	0.077	1	0.1
VC_2600	1	90	0.011	1	0
VC_2606	1	69	0.014	1	0
VC_2633	1	22	0.045	1	0
VC_2647	1	31	0.032	1	0
VC_2684	1	90	0.011	1	0
VC_2736	1	34	0.029	1	0
VC_2772	1	31	0.032	1	0
VC_A0001	1	9	0.111	1	0.1
VC_A0021	1	50	0.02	1	0
VC_A0044	1	150	0.007	1	0
VC_A0080	1	104	0.01	1	0
VC_A0097	1	28	0.036	1	0
VC_A0123	1	161	0.006	1	0
VC_A0175	1	33	0.03	1	0
VC_A0274	1	31	0.032	1	0
VC_A0277	1	12	0.083	1	0.1
VC_A0510	1	160	0.006	1	0
VC_A0517	1	36	0.028	1	0
VC_A0536	1	46	0.022	1	0
VC_A0567	1	56	0.018	1	0
VC_A0600	1	35	0.029	1	0
VC_A0694	1	19	0.053	1	0.1
VC_A0731	1	18	0.056	1	0.1
VC_A0770	1	4	0.25	1	0.2
VC_A0776	1	28	0.036	1	0
VC_A0785	1	69	0.014	1	0
VC_A0843	1	78	0.013	1	0
VC_A0890	1	18	0.056	1	0.1
VC_A0905	1	41	0.024	1	0
VC_A0947	1	35	0.029	1	0
VC_A0952	1	42	0.024	1	0
VC_A0981	1	37	0.027	1	0
VC_A0985	1	99	0.01	1	0
VC_A0990	1	47	0.021	1	0
VC_A1067	1	58	0.017	1	0
VC_A1069	1	61	0.016	1	0
VC_A1075	1	53	0.019	1	0
IG_1	0	24	0	0	0
IG_VC_0003	0	1	0	0	0
IG_VC_0004	0	3	0	0	0
IG_VC_0007	0	1	0	0	0
IG_VC_0008	0	10	0	0	0
IG_VC_0010	0	6	0	0	0
IG_VC_0011	0	16	0	0	0
IG_VC_0012	0	3	0	0	0
IG_VC_0013	0	5	0	0	0
IG_VC_0014	0	3	0	0	0
IG_VC_0015	0	1	0	0	0
IG_VC_0016	0	19	0	0	0
IG_VC_0018	0	18	0	0	0
IG_VC_0019	0	3	0	0	0
IG_VC_0020	0	15	0	0	0
IG_VC_0022	0	14	0	0	0
IG_VC_0023	0	8	0	0	0
IG_VC_0024	0	5	0	0	0
IG_VC_0025	0	11	0	0	0
IG_VC_0026	0	8	0	0	0
IG_VC_0027	0	14	0	0	0
IG_VC_0033	0	6	0	0	0
IG_VC_0034	0	2	0	0	0
IG_VC_0035	0	1	0	0	0
IG_VC_0037	0	24	0	0	0
IG_VC_0038	0	6	0	0	0
IG_VC_0039	0	17	0	0	0
IG_VC_0040	0	5	0	0	0
IG_VC_0041	0	2	0	0	0
IG_VC_0045	0	3	0	0	0
IG_VC_0046	0	2	0	0	0
IG_VC_0049	0	1	0	0	0
IG_VC_0051	0	6	0	0	0
IG_VC_0061	0	20	0	0	0
IG_VC_0067	0	12	0	0	0
IG_VC_0069	0	4	0	0	0
IG_VC_0070	0	8	0	0	0
IG_VC_0072	0	5	0	0	0
IG_VC_0074	0	5	0	0	0
IG_VC_0075	0	2	0	0	0
IG_VC_0076	0	3	0	0	0
IG_VC_0078	0	1	0	0	0
IG_VC_0079	0	1	0	0	0
IG_VC_0080	0	6	0	0	0
IG_VC_0082	0	8	0	0	0
IG_VC_0083	0	1	0	0	0
IG_VC_0084	0	1	0	0	0
IG_VC_0086	0	3	0	0	0
IG_VC_0088	0	7	0	0	0
IG_VC_0089	0	20	0	0	0
IG_VC_0090	0	7	0	0	0
IG_VC_0091	0	5	0	0	0
IG_VC_0092	0	1	0	0	0
IG_VC_0093	0	12	0	0	0
IG_VC_0094	0	2	0	0	0
IG_VC_0096	0	2	0	0	0
IG_VC_0097	0	5	0	0	0
IG_VC_0098	0	3	0	0	0
IG_VC_0100	0	1	0	0	0
IG_VC_0102	0	7	0	0	0
IG_VC_0103	0	9	0	0	0
IG_VC_0104	0	2	0	0	0
IG_VC_0107	0	30	0	0	0
IG_VC_0108	0	6	0	0	0
IG_VC_0110	0	17	0	0	0
IG_VC_0111	0	16	0	0	0
IG_VC_0112	0	8	0	0	0
IG_VC_0113	0	10	0	0	0
IG_VC_0116	0	3	0	0	0
IG_VC_0117	0	1	0	0	0
IG_VC_0120	0	4	0	0	0
IG_VC_0123	0	6	0	0	0
IG_VC_0125	0	3	0	0	0
IG_VC_0130	0	9	0	0	0
IG_VC_0131	0	2	0	0	0
IG_VC_0134	0	3	0	0	0
IG_VC_0135	0	5	0	0	0
IG_VC_0136	0	2	0	0	0
IG_VC_0138	0	1	0	0	0
IG_VC_0139	0	4	0	0	0
IG_VC_0140	0	16	0	0	0
IG_VC_0141	0	4	0	0	0
IG_VC_0142	0	3	0	0	0
IG_VC_0143	0	42	0	0	0
IG_VC_0144	0	12	0	0	0
IG_VC_0145	0	3	0	0	0
IG_VC_0147	0	13	0	0	0
IG_VC_0150	0	6	0	0	0
IG_VC_0153	0	2	0	0	0
IG_VC_0154	0	1	0	0	0
IG_VC_0156	0	23	0	0	0
IG_VC_0157	0	4	0	0	0
IG_VC_0158	0	31	0	0	0
IG_VC_0162	0	11	0	0	0
IG_VC_0163	0	10	0	0	0
IG_VC_0164	0	9	0	0	0
IG_VC_0167	0	13	0	0	0
IG_VC_0168	0	5	0	0	0
IG_VC_0169	0	88	0	0	0
IG_VC_0170	0	5	0	0	0
IG_VC_0171	0	1	0	0	0
IG_VC_0172	0	4	0	0	0
IG_VC_0174	0	11	0	0	0
IG_VC_0175	0	18	0	0	0
IG_VC_0176	0	44	0	0	0
IG_VC_0177	0	13	0	0	0
IG_VC_0179	0	1	0	0	0
IG_VC_0182	0	3	0	0	0
IG_VC_0186	0	8	0	0	0
IG_VC_0187	0	5	0	0	0
IG_VC_0189	0	2	0	0	0
IG_VC_0192	0	3	0	0	0
IG_VC_0193	0	4	0	0	0
IG_VC_0194	0	1	0	0	0
IG_VC_0195	0	12	0	0	0
IG_VC_0196	0	11	0	0	0
IG_VC_0198	0	13	0	0	0
IG_VC_0199	0	1	0	0	0
IG_VC_0200	0	7	0	0	0
IG_VC_0201	0	1	0	0	0
IG_VC_0205	0	5	0	0	0
IG_VC_0208	0	6	0	0	0
IG_VC_0209	0	6	0	0	0
IG_VC_0210	0	7	0	0	0
IG_VC_0211	0	20	0	0	0
IG_VC_0212	0	5	0	0	0
IG_VC_0215	0	6	0	0	0
IG_VC_0216	0	8	0	0	0
IG_VC_0217	0	4	0	0	0
IG_VC_0218	0	16	0	0	0
IG_VC_0220	0	15	0	0	0
IG_VC_0222	0	5	0	0	0
IG_VC_0223	0	6	0	0	0
IG_VC_0224	0	5	0	0	0
IG_VC_0225	0	5	0	0	0
IG_VC_0228	0	1	0	0	0
IG_VC_0229	0	1	0	0	0
IG_VC_0239	0	1	0	0	0
IG_VC_0240	0	13	0	0	0
IG_VC_0241	0	42	0	0	0
IG_VC_0244	0	1	0	0	0
IG_VC_0248	0	6	0	0	0
IG_VC_0249	0	2	0	0	0
IG_VC_0252	0	5	0	0	0
IG_VC_0253	0	11	0	0	0
IG_VC_0254	0	18	0	0	0
IG_VC_0255	0	13	0	0	0
IG_VC_0256	0	1	0	0	0
IG_VC_0259	0	5	0	0	0
IG_VC_0261	0	8	0	0	0
IG_VC_0263	0	1	0	0	0
IG_VC_0264	0	6	0	0	0
IG_VC_0266	0	5	0	0	0
IG_VC_0271	0	24	0	0	0
IG_VC_0273	0	15	0	0	0
IG_VC_0275	0	6	0	0	0
IG_VC_0276	0	3	0	0	0
IG_VC_0277	0	15	0	0	0
IG_VC_0278	0	18	0	0	0
IG_VC_0279	0	21	0	0	0
IG_VC_0281	0	1	0	0	0
IG_VC_0282	0	5	0	0	0
IG_VC_0283	0	6	0	0	0
IG_VC_0285	0	14	0	0	0
IG_VC_0286	0	1	0	0	0
IG_VC_0287	0	15	0	0	0
IG_VC_0289	0	3	0	0	0
IG_VC_0290	0	12	0	0	0
IG_VC_0291	0	2	0	0	0
IG_VC_0293	0	4	0	0	0
IG_VC_0295	0	7	0	0	0
IG_VC_0299	0	7	0	0	0
IG_VC_0302	0	6	0	0	0
IG_VC_0303	0	2	0	0	0
IG_VC_0307	0	19	0	0	0
IG_VC_0308	0	5	0	0	0
IG_VC_0309	0	7	0	0	0
IG_VC_0313	0	15	0	0	0
IG_VC_0318	0	2	0	0	0
IG_VC_0320	0	2	0	0	0
IG_VC_0321	0	34	0	0	0
IG_VC_0322	0	10	0	0	0
IG_VC_0323	0	3	0	0	0
IG_VC_0324	0	10	0	0	0
IG_VC_0325	0	1	0	0	0
IG_VC_0326	0	20	0	0	0
IG_VC_0327	0	6	0	0	0
IG_VC_0328	0	10	0	0	0
IG_VC_0329	0	6	0	0	0
IG_VC_0330	0	6	0	0	0
IG_VC_0331	0	11	0	0	0
IG_VC_0332	0	17	0	0	0
IG_VC_0333	0	1	0	0	0
IG_VC_0334	0	4	0	0	0
IG_VC_0336	0	8	0	0	0
IG_VC_0337	0	13	0	0	0
IG_VC_0338	0	2	0	0	0
IG_VC_0339	0	9	0	0	0
IG_VC_0341	0	15	0	0	0
IG_VC_0342	0	101	0	0	0
IG_VC_0348	0	2	0	0	0
IG_VC_0349	0	5	0	0	0
IG_VC_0351	0	4	0	0	0
IG_VC_0352	0	2	0	0	0
IG_VC_0354	0	8	0	0	0
IG_VC_0355	0	12	0	0	0
IG_VC_0358	0	1	0	0	0
IG_VC_0359	0	14	0	0	0
IG_VC_0360	0	8	0	0	0
IG_VC_0361	0	6	0	0	0
IG_VC_0362	0	9	0	0	0
IG_VC_0363	0	8	0	0	0
IG_VC_0364	0	6	0	0	0
IG_VC_0366	0	15	0	0	0
IG_VC_0368	0	1	0	0	0
IG_VC_0369	0	3	0	0	0
IG_VC_0370	0	4	0	0	0
IG_VC_0371	0	9	0	0	0
IG_VC_0373	0	1	0	0	0
IG_VC_0375	0	3	0	0	0
IG_VC_0376	0	5	0	0	0
IG_VC_0377	0	3	0	0	0
IG_VC_0379	0	25	0	0	0
IG_VC_0381	0	6	0	0	0
IG_VC_0384	0	8	0	0	0
IG_VC_0390	0	10	0	0	0
IG_VC_0391	0	3	0	0	0
IG_VC_0393	0	6	0	0	0
IG_VC_0394	0	3	0	0	0
IG_VC_0395	0	11	0	0	0
IG_VC_0396	0	7	0	0	0
IG_VC_0398	0	11	0	0	0
IG_VC_0399	0	1	0	0	0
IG_VC_0402	0	2	0	0	0
IG_VC_0403	0	1	0	0	0
IG_VC_0406	0	1	0	0	0
IG_VC_0407	0	1	0	0	0
IG_VC_0408	0	9	0	0	0
IG_VC_0409	0	1	0	0	0
IG_VC_0410	0	5	0	0	0
IG_VC_0415	0	7	0	0	0
IG_VC_0416	0	4	0	0	0
IG_VC_0419	0	1	0	0	0
IG_VC_0420	0	1	0	0	0
IG_VC_0423	0	4	0	0	0
IG_VC_0425	0	10	0	0	0
IG_VC_0426	0	1	0	0	0
IG_VC_0431	0	25	0	0	0
IG_VC_0432	0	10	0	0	0
IG_VC_0433	0	32	0	0	0
IG_VC_0434	0	8	0	0	0
IG_VC_0435	0	17	0	0	0
IG_VC_0436	0	2	0	0	0
IG_VC_0437	0	15	0	0	0
IG_VC_0438	0	3	0	0	0
IG_VC_0440	0	1	0	0	0
IG_VC_0441	0	7	0	0	0
IG_VC_0443	0	5	0	0	0
IG_VC_0446	0	5	0	0	0
IG_VC_0447	0	8	0	0	0
IG_VC_0450	0	39	0	0	0
IG_VC_0454	0	4	0	0	0
IG_VC_0455	0	12	0	0	0
IG_VC_0457	0	3	0	0	0
IG_VC_0460	0	2	0	0	0
IG_VC_0461	0	2	0	0	0
IG_VC_0462	0	3	0	0	0
IG_VC_0463	0	2	0	0	0
IG_VC_0464	0	5	0	0	0
IG_VC_0465	0	5	0	0	0
IG_VC_0466	0	1	0	0	0
IG_VC_0467	0	5	0	0	0
IG_VC_0469	0	1	0	0	0
IG_VC_0470	0	9	0	0	0
IG_VC_0471	0	10	0	0	0
IG_VC_0472	0	8	0	0	0
IG_VC_0473	0	24	0	0	0
IG_VC_0474	0	4	0	0	0
IG_VC_0475	0	16	0	0	0
IG_VC_0476	0	2	0	0	0
IG_VC_0478	0	7	0	0	0
IG_VC_0479	0	14	0	0	0
IG_VC_0480	0	1	0	0	0
IG_VC_0481	0	7	0	0	0
IG_VC_0482	0	17	0	0	0
IG_VC_0483	0	5	0	0	0
IG_VC_0484	0	28	0	0	0
IG_VC_0485	0	4	0	0	0
IG_VC_0486	0	27	0	0	0
IG_VC_0487	0	8	0	0	0
IG_VC_0488	0	4	0	0	0
IG_VC_0489	0	14	0	0	0
IG_VC_0494	0	38	0	0	0
IG_VC_0495	0	4	0	0	0
IG_VC_0496	0	5	0	0	0
IG_VC_0497	0	5	0	0	0
IG_VC_0498	0	4	0	0	0
IG_VC_0499	0	7	0	0	0
IG_VC_0500	0	2	0	0	0
IG_VC_0502	0	34	0	0	0
IG_VC_0503	0	61	0	0	0
IG_VC_0506	0	1	0	0	0
IG_VC_0507	0	7	0	0	0
IG_VC_0509	0	2	0	0	0
IG_VC_0515	0	13	0	0	0
IG_VC_0516	0	53	0	0	0
IG_VC_0517	0	33	0	0	0
IG_VC_0518	0	9	0	0	0
IG_VC_0519	0	1	0	0	0
IG_VC_0520	0	3	0	0	0
IG_VC_0521	0	11	0	0	0
IG_VC_0522	0	12	0	0	0
IG_VC_0523	0	1	0	0	0
IG_VC_0524	0	12	0	0	0
IG_VC_0527	0	5	0	0	0
IG_VC_0530	0	3	0	0	0
IG_VC_0534	0	5	0	0	0
IG_VC_0535	0	4	0	0	0
IG_VC_0536	0	1	0	0	0
IG_VC_0537	0	6	0	0	0
IG_VC_0539	0	4	0	0	0
IG_VC_0540	0	1	0	0	0
IG_VC_0542	0	10	0	0	0
IG_VC_0544	0	3	0	0	0
IG_VC_0545	0	10	0	0	0
IG_VC_0546	0	4	0	0	0
IG_VC_0547	0	2	0	0	0
IG_VC_0550	0	3	0	0	0
IG_VC_0552	0	2	0	0	0
IG_VC_0556	0	3	0	0	0
IG_VC_0557	0	3	0	0	0
IG_VC_0558	0	4	0	0	0
IG_VC_0559	0	4	0	0	0
IG_VC_0561	0	12	0	0	0
IG_VC_0562	0	7	0	0	0
IG_VC_0563	0	2	0	0	0
IG_VC_0564	0	7	0	0	0
IG_VC_0565	0	4	0	0	0
IG_VC_0566	0	10	0	0	0
IG_VC_0567	0	7	0	0	0
IG_VC_0568	0	14	0	0	0
IG_VC_0570	0	7	0	0	0
IG_VC_0573	0	14	0	0	0
IG_VC_0576	0	7	0	0	0
IG_VC_0578	0	2	0	0	0
IG_VC_0583	0	11	0	0	0
IG_VC_0584	0	18	0	0	0
IG_VC_0586	0	2	0	0	0
IG_VC_0587	0	14	0	0	0
IG_VC_0588	0	7	0	0	0
IG_VC_0589	0	9	0	0	0
IG_VC_0591	0	2	0	0	0
IG_VC_0592	0	1	0	0	0
IG_VC_0595	0	6	0	0	0
IG_VC_0596	0	1	0	0	0
IG_VC_0597	0	10	0	0	0
IG_VC_0599	0	1	0	0	0
IG_VC_0603	0	11	0	0	0
IG_VC_0604	0	12	0	0	0
IG_VC_0605	0	8	0	0	0
IG_VC_0606	0	11	0	0	0
IG_VC_0608	0	7	0	0	0
IG_VC_0609	0	10	0	0	0
IG_VC_0611	0	4	0	0	0
IG_VC_0612	0	7	0	0	0
IG_VC_0613	0	6	0	0	0
IG_VC_0616	0	2	0	0	0
IG_VC_0617	0	2	0	0	0
IG_VC_0621	0	38	0	0	0
IG_VC_0623	0	3	0	0	0
IG_VC_0624	0	2	0	0	0
IG_VC_0625	0	3	0	0	0
IG_VC_0626	0	1	0	0	0
IG_VC_0627	0	18	0	0	0
IG_VC_0628	0	8	0	0	0
IG_VC_0631	0	10	0	0	0
IG_VC_0632	0	5	0	0	0
IG_VC_0633	0	4	0	0	0
IG_VC_0634	0	37	0	0	0
IG_VC_0635	0	3	0	0	0
IG_VC_0636	0	14	0	0	0
IG_VC_0637	0	16	0	0	0
IG_VC_0638	0	5	0	0	0
IG_VC_0639	0	2	0	0	0
IG_VC_0640	0	14	0	0	0
IG_VC_0642	0	1	0	0	0
IG_VC_0646	0	8	0	0	0
IG_VC_0647	0	30	0	0	0
IG_VC_0648	0	8	0	0	0
IG_VC_0649	0	6	0	0	0
IG_VC_0651	0	2	0	0	0
IG_VC_0653	0	6	0	0	0
IG_VC_0656	0	6	0	0	0
IG_VC_0659	0	14	0	0	0
IG_VC_0661	0	7	0	0	0
IG_VC_0662	0	28	0	0	0
IG_VC_0663	0	15	0	0	0
IG_VC_0664	0	2	0	0	0
IG_VC_0666	0	33	0	0	0
IG_VC_0667	0	1	0	0	0
IG_VC_0669	0	20	0	0	0
IG_VC_0675	0	2	0	0	0
IG_VC_0676	0	7	0	0	0
IG_VC_0677	0	31	0	0	0
IG_VC_0678	0	13	0	0	0
IG_VC_0679	0	4	0	0	0
IG_VC_0680	0	15	0	0	0
IG_VC_0681	0	6	0	0	0
IG_VC_0682	0	3	0	0	0
IG_VC_0683	0	2	0	0	0
IG_VC_0684	0	10	0	0	0
IG_VC_0685	0	4	0	0	0
IG_VC_0689	0	1	0	0	0
IG_VC_0690	0	1	0	0	0
IG_VC_0691	0	1	0	0	0
IG_VC_0692	0	5	0	0	0
IG_VC_0693	0	2	0	0	0
IG_VC_0694	0	1	0	0	0
IG_VC_0695	0	20	0	0	0
IG_VC_0696	0	1	0	0	0
IG_VC_0697	0	1	0	0	0
IG_VC_0698	0	5	0	0	0
IG_VC_0699	0	12	0	0	0
IG_VC_0700	0	8	0	0	0
IG_VC_0702	0	2	0	0	0
IG_VC_0705	0	14	0	0	0
IG_VC_0706	0	15	0	0	0
IG_VC_0707	0	19	0	0	0
IG_VC_0711	0	8	0	0	0
IG_VC_0712	0	16	0	0	0
IG_VC_0716	0	1	0	0	0
IG_VC_0718	0	7	0	0	0
IG_VC_0719	0	13	0	0	0
IG_VC_0720	0	2	0	0	0
IG_VC_0722	0	1	0	0	0
IG_VC_0724	0	17	0	0	0
IG_VC_0725	0	1	0	0	0
IG_VC_0726	0	1	0	0	0
IG_VC_0727	0	3	0	0	0
IG_VC_0728	0	2	0	0	0
IG_VC_0729	0	3	0	0	0
IG_VC_0730	0	3	0	0	0
IG_VC_0732	0	20	0	0	0
IG_VC_0733	0	20	0	0	0
IG_VC_0734	0	17	0	0	0
IG_VC_0736	0	4	0	0	0
IG_VC_0737	0	7	0	0	0
IG_VC_0738	0	6	0	0	0
IG_VC_0739	0	5	0	0	0
IG_VC_0742	0	5	0	0	0
IG_VC_0743	0	1	0	0	0
IG_VC_0744	0	2	0	0	0
IG_VC_0745	0	11	0	0	0
IG_VC_0746	0	7	0	0	0
IG_VC_0748	0	2	0	0	0
IG_VC_0749	0	3	0	0	0
IG_VC_0750	0	4	0	0	0
IG_VC_0751	0	2	0	0	0
IG_VC_0754	0	4	0	0	0
IG_VC_0755	0	8	0	0	0
IG_VC_0757	0	11	0	0	0
IG_VC_0758	0	17	0	0	0
IG_VC_0760	0	3	0	0	0
IG_VC_0761	0	2	0	0	0
IG_VC_0763	0	16	0	0	0
IG_VC_0764	0	3	0	0	0
IG_VC_0765	0	25	0	0	0
IG_VC_0767	0	16	0	0	0
IG_VC_0768	0	7	0	0	0
IG_VC_0769	0	20	0	0	0
IG_VC_0770	0	15	0	0	0
IG_VC_0771	0	17	0	0	0
IG_VC_0772	0	6	0	0	0
IG_VC_0773	0	1	0	0	0
IG_VC_0774	0	10	0	0	0
IG_VC_0776	0	13	0	0	0
IG_VC_0779	0	4	0	0	0
IG_VC_0781	0	2	0	0	0
IG_VC_0783	0	9	0	0	0
IG_VC_0784	0	5	0	0	0
IG_VC_0785	0	23	0	0	0
IG_VC_0787	0	7	0	0	0
IG_VC_0788	0	9	0	0	0
IG_VC_0789	0	11	0	0	0
IG_VC_0792	0	6	0	0	0
IG_VC_0795	0	4	0	0	0
IG_VC_0796	0	27	0	0	0
IG_VC_0797	0	4	0	0	0
IG_VC_0803	0	3	0	0	0
IG_VC_0804	0	12	0	0	0
IG_VC_0805	0	4	0	0	0
IG_VC_0806	0	4	0	0	0
IG_VC_0807	0	1	0	0	0
IG_VC_0811	0	37	0	0	0
IG_VC_0812	0	11	0	0	0
IG_VC_0814	0	28	0	0	0
IG_VC_0816	0	15	0	0	0
IG_VC_0817	0	30	0	0	0
IG_VC_0818	0	3	0	0	0
IG_VC_0819	0	39	0	0	0
IG_VC_0820	0	9	0	0	0
IG_VC_0821	0	16	0	0	0
IG_VC_0822	0	13	0	0	0
IG_VC_0824	0	16	0	0	0
IG_VC_0825	0	24	0	0	0
IG_VC_0826	0	53	0	0	0
IG_VC_0828	0	40	0	0	0
IG_VC_0829	0	11	0	0	0
IG_VC_0831	0	1	0	0	0
IG_VC_0834	0	1	0	0	0
IG_VC_0837	0	2	0	0	0
IG_VC_0838	0	28	0	0	0
IG_VC_0840	0	1	0	0	0
IG_VC_0841	0	1	0	0	0
IG_VC_0842	0	2	0	0	0
IG_VC_0843	0	2	0	0	0
IG_VC_0845	0	21	0	0	0
IG_VC_0846	0	69	0	0	0
IG_VC_0847	0	41	0	0	0
IG_VC_0848	0	41	0	0	0
IG_VC_0849	0	9	0	0	0
IG_VC_0851	0	1	0	0	0
IG_VC_0852	0	3	0	0	0
IG_VC_0853	0	13	0	0	0
IG_VC_0854	0	7	0	0	0
IG_VC_0855	0	15	0	0	0
IG_VC_0856	0	12	0	0	0
IG_VC_0857	0	1	0	0	0
IG_VC_0858	0	6	0	0	0
IG_VC_0862	0	1	0	0	0
IG_VC_0864	0	3	0	0	0
IG_VC_0865	0	2	0	0	0
IG_VC_0870	0	10	0	0	0
IG_VC_0871	0	7	0	0	0
IG_VC_0873	0	6	0	0	0
IG_VC_0874	0	2	0	0	0
IG_VC_0876	0	14	0	0	0
IG_VC_0877	0	2	0	0	0
IG_VC_0878	0	1	0	0	0
IG_VC_0880	0	14	0	0	0
IG_VC_0881	0	3	0	0	0
IG_VC_0883	0	28	0	0	0
IG_VC_0884	0	2	0	0	0
IG_VC_0887	0	7	0	0	0
IG_VC_0889	0	3	0	0	0
IG_VC_0892	0	21	0	0	0
IG_VC_0893	0	1	0	0	0
IG_VC_0895	0	15	0	0	0
IG_VC_0897	0	2	0	0	0
IG_VC_0898	0	1	0	0	0
IG_VC_0899	0	1	0	0	0
IG_VC_0900	0	22	0	0	0
IG_VC_0901	0	7	0	0	0
IG_VC_0902	0	2	0	0	0
IG_VC_0903	0	2	0	0	0
IG_VC_0905	0	7	0	0	0
IG_VC_0908	0	21	0	0	0
IG_VC_0909	0	4	0	0	0
IG_VC_0910	0	14	0	0	0
IG_VC_0911	0	5	0	0	0
IG_VC_0913	0	14	0	0	0
IG_VC_0915	0	4	0	0	0
IG_VC_0916	0	34	0	0	0
IG_VC_0923	0	1	0	0	0
IG_VC_0928	0	20	0	0	0
IG_VC_0929	0	23	0	0	0
IG_VC_0930	0	20	0	0	0
IG_VC_0931	0	8	0	0	0
IG_VC_0932	0	11	0	0	0
IG_VC_0934	0	53	0	0	0
IG_VC_0935	0	6	0	0	0
IG_VC_0937	0	3	0	0	0
IG_VC_0941	0	23	0	0	0
IG_VC_0942	0	7	0	0	0
IG_VC_0943	0	8	0	0	0
IG_VC_0945	0	17	0	0	0
IG_VC_0948	0	7	0	0	0
IG_VC_0953	0	5	0	0	0
IG_VC_0955	0	2	0	0	0
IG_VC_0956	0	2	0	0	0
IG_VC_0958	0	4	0	0	0
IG_VC_0959	0	4	0	0	0
IG_VC_0960	0	8	0	0	0
IG_VC_0962	0	5	0	0	0
IG_VC_0963	0	18	0	0	0
IG_VC_0964	0	7	0	0	0
IG_VC_0966	0	8	0	0	0
IG_VC_0967	0	9	0	0	0
IG_VC_0968	0	1	0	0	0
IG_VC_0969	0	11	0	0	0
IG_VC_0970	0	12	0	0	0
IG_VC_0971	0	12	0	0	0
IG_VC_0973	0	5	0	0	0
IG_VC_0974	0	2	0	0	0
IG_VC_0975	0	3	0	0	0
IG_VC_0977	0	35	0	0	0
IG_VC_0978	0	9	0	0	0
IG_VC_0979	0	7	0	0	0
IG_VC_0980	0	4	0	0	0
IG_VC_0981	0	20	0	0	0
IG_VC_0982	0	3	0	0	0
IG_VC_0983	0	3	0	0	0
IG_VC_0985	0	13	0	0	0
IG_VC_0986	0	23	0	0	0
IG_VC_0987	0	10	0	0	0
IG_VC_0988	0	4	0	0	0
IG_VC_0989	0	18	0	0	0
IG_VC_0990	0	3	0	0	0
IG_VC_0991	0	8	0	0	0
IG_VC_0992	0	14	0	0	0
IG_VC_0993	0	14	0	0	0
IG_VC_0994	0	1	0	0	0
IG_VC_0996	0	10	0	0	0
IG_VC_0997	0	2	0	0	0
IG_VC_0999	0	9	0	0	0
IG_VC_1000	0	11	0	0	0
IG_VC_1001	0	6	0	0	0
IG_VC_1003	0	3	0	0	0
IG_VC_1004	0	1	0	0	0
IG_VC_1005	0	4	0	0	0
IG_VC_1006	0	4	0	0	0
IG_VC_1007	0	2	0	0	0
IG_VC_1008	0	5	0	0	0
IG_VC_1009	0	2	0	0	0
IG_VC_1010	0	8	0	0	0
IG_VC_1012	0	1	0	0	0
IG_VC_1018	0	52	0	0	0
IG_VC_1021	0	22	0	0	0
IG_VC_1024	0	26	0	0	0
IG_VC_1025	0	3	0	0	0
IG_VC_1028	0	1	0	0	0
IG_VC_1029	0	2	0	0	0
IG_VC_1030	0	7	0	0	0
IG_VC_1031	0	2	0	0	0
IG_VC_1035	0	5	0	0	0
IG_VC_1036	0	12	0	0	0
IG_VC_1038	0	11	0	0	0
IG_VC_1039	0	4	0	0	0
IG_VC_1040	0	5	0	0	0
IG_VC_1041	0	5	0	0	0
IG_VC_1042	0	1	0	0	0
IG_VC_1043	0	25	0	0	0
IG_VC_1044	0	19	0	0	0
IG_VC_1046	0	22	0	0	0
IG_VC_1048	0	8	0	0	0
IG_VC_1049	0	7	0	0	0
IG_VC_1050	0	20	0	0	0
IG_VC_1051	0	13	0	0	0
IG_VC_1053	0	5	0	0	0
IG_VC_1054	0	1	0	0	0
IG_VC_1055	0	2	0	0	0
IG_VC_1056	0	1	0	0	0
IG_VC_1057	0	6	0	0	0
IG_VC_1058	0	9	0	0	0
IG_VC_1059	0	3	0	0	0
IG_VC_1060	0	9	0	0	0
IG_VC_1061	0	6	0	0	0
IG_VC_1062	0	4	0	0	0
IG_VC_1064	0	10	0	0	0
IG_VC_1065	0	3	0	0	0
IG_VC_1066	0	5	0	0	0
IG_VC_1067	0	8	0	0	0
IG_VC_1068	0	31	0	0	0
IG_VC_1070	0	2	0	0	0
IG_VC_1071	0	2	0	0	0
IG_VC_1072	0	12	0	0	0
IG_VC_1073	0	23	0	0	0
IG_VC_1074	0	5	0	0	0
IG_VC_1075	0	19	0	0	0
IG_VC_1076	0	1	0	0	0
IG_VC_1078	0	5	0	0	0
IG_VC_1079	0	2	0	0	0
IG_VC_1080	0	20	0	0	0
IG_VC_1082	0	3	0	0	0
IG_VC_1084	0	2	0	0	0
IG_VC_1085	0	1	0	0	0
[truncated: 4,642 more rows]
