# Supplementary material for: BipA exerts temperature-dependent translational control of biofilm-associated colony morphology in Vibrio cholerae
Source: eLife. 2021 Feb 16;10:e60607. doi: 10.7554/eLife.60607 (PMC7886329; doi:10.7554/eLife.60607)
Supplement: Supplementary file 8. [file elife-60607-supp8.xlsx]

## Sheet: Table content
The proteomic analysis was able to identify 1639 (43%) of 3783 known V. cholerae proteins, out of which 695 were significantly differentially abundant
Table content:
0757FeCa_anova t test 6 combinations from Perseus - Table 1: proteins that were detected in all 4 conditions
Biofilm 1: Biofilm activities from Table 1
0757FeCa_perseus table before valid values filtering and statistic_with annotations_version 2- Table 2: Proteins that only were detected in some of the conditions (but not in all 4 conditions)
Biofilm v2.0: Biofilm activities from Table 2
Biofilm all: Biofilm activities from Tables 1 and 2
37Cvs22C: Same as Table 1, co969 37Cvs22C comparison highlighted in orange.
mut 37Cvs22C: Same as Table 1, co969 DVC2477 37Cvs22C comparison highlighted in orange.
37C mutvswt: Same as Table 1, 37C co969DVC2744 vs co969 wt comparison highlighted in orange.
22C mutvswt: Same as Table 1, 22C co969DVC2744 vs co969 wt comparison highlighted in orange.
Identified proteins: Proteins identified in the proteomic assay
GOBP_function_overrepresent: Overrepresented proteins in co969 22C vs co969 DVC2744 22C organized by GOBP function

## Sheet: 0757FeCa_anova t test 6 combina
Table 1: proteins that were detected in all 4 conditions
log 10 co969 37eC sample 1	log 10 co969 37eC sample 2	log 10 co969 37eC sample 3	log 10 co969 AVC2744 37eC sample 1	log 10 co969 AVC2744 37eC sample 2	log 10 co969 AVCZ744 37eC sample 3	log 10 co969 22eC sample 1	log 10 co969 22eC sample 2	log 10 co969 22eC sample 3	log 10 co969 AVC2744 22eC sample 1	log 10 co969 AVC2744 22eC sample 2	log 10 co969 AVC2744 22eC sample 3	ANOVA Significant	t-test Significant 37eC vs AV37eC	t-test Significant 37eC vs 22eC	t-test Significant 37eC vs AV22eC	t-test Significant AV37eC vs AV22eC	t-test Significant AV37eC vs 22eC	t-test Significant 22eC vs AV22eC	GOBP name	GOMF name	GOCC name	KEGG name	GOBP	GOMF	GOCC	KEGG	Score	Q-value	Mol. weight [kDa]	co969 37eC	co969 AVC2744 37eC	co969 22eC	co969 AVC2744 22eC	#NAME?	-Log t-test p value 37eC vs AV37eC	t-test Difference 37eC vs AV37eC	-Log t-test p value 37eC vs 22eC	t-test Difference 37eC vs 22eC	-Log t-test p value 37eC vs AV22eC	t-test Difference 37eC vs AV22eC	#NAME?	t-test Difference AV37eC vs AV22eC	-Log t-test p value AV37eC vs 22eC	t-test Difference AV37eC vs 22eC	-Log t-test p value 22eC vs AV22eC	t-test Difference 22eC vs AV22eC	Majority protein IDs	Fasta headers
7.28242	7.36858	7.24522	7.54298	7.44543	7.5274	7.13168	7.22642	7.18239	7.2164	7.19307	7.11548	+	+			+	+										41.189	0	10.583	20038334	32161000	15201333	15034333	3.64811	1.91648	-0.206529	1.22033	0.118577	1.22153	0.123756	2.81246	0.330285	2.87168	0.325106	0.0430953	0.00517941	B1B1N2	>tr|B1B1N2|B1B1N2_VIBCH Hemolysin OS=Vibrio cholerae serotype O1 (strain ATCC 39315 / El Tor Inaba N16961) GN=VC_A0594 PE=4 SV=1
7.56003	7.55476	7.66879	7.68011	7.64702	7.6553	7.51296	7.50861	7.53255	7.46619	7.50188	7.49801	+				+	+			catalytic activity				GO:0003824			167.1	0	52.571	39608332	45818332	32973666	30830666	2.87296	0.795974	-0.0662877	0.944396	0.076481	1.27782	0.105832	3.47609	0.172119	3.49228	0.142769	1.02108	0.0293508	H9L4Q1	>tr|H9L4Q1|H9L4Q1_VIBCH RfbL protein OS=Vibrio cholerae serotype O1 (strain ATCC 39315 / El Tor Inaba N16961) GN=VC_0249 PE=4 SV=1
7.92066	7.92157	7.93111	7.85554	8.01258	8.01102	7.88685	7.90307	7.71446	7.72052	7.68305	7.7246	+			+	+						Bacterial secretion system				ko03070	36.543	0	19.059	84037336	92404336	69625000	51261000	2.00462	0.270587	-0.0352675	0.673365	0.0896546	4.02446	0.215058	2.01751	0.250325	0.716279	0.124922	0.949846	0.125403	H9L4Q3	>tr|H9L4Q3|H9L4Q3_VIBCH Hcp protein OS=Vibrio cholerae serotype O1 (strain ATCC 39315 / El Tor Inaba N16961) GN=VC_1415 PE=4 SV=1
7.42888	7.63508	7.4957	7.20807	7.26461	7.17032	7.14811	7.26148	6.85989	7.24913	7.05994	7.0898	+	+	+	+					catalytic activity;transferase activity				GO:0003824;GO:0016740			116.88	0	20.016	33772332	16446333	13188500	13841333	1.8644	1.99393	0.305556	1.48587	0.430061	1.99207	0.386931	0.556692	0.081375	0.434858	0.124506	0.117888	-0.0431306	H9L4Q4	>tr|H9L4Q4|H9L4Q4_VIBCH Acetyltransferase RfbO, CysE/LacA/LpxA/NodL family OS=Vibrio cholerae serotype O1 (strain ATCC 39315 / El Tor Inaba N16961) GN=VC_0252 PE=4 SV=1
7.72682	7.71108	7.85869	7.92253	7.84471	7.85785	7.55864	7.57008	7.42047	7.94417	7.90507	7.89506	+		+	+		+	+				Vibrio cholerae pathogenic cycle				ko05111	48.459	0	18.438	58983332	75229000	33228334	82278336	3.64034	0.975131	-0.109504	1.68622	0.249135	1.41434	-0.149235	0.63169	-0.0397312	2.58114	0.358639	2.85966	-0.398371	H9L4Q5	>tr|H9L4Q5|H9L4Q5_VIBCH MSHA pilin protein MshA OS=Vibrio cholerae serotype O1 (strain ATCC 39315 / El Tor Inaba N16961) GN=VC_0409 PE=4 SV=1
8.62426	8.65693	8.61284	8.63072	8.7569	8.754	8.60304	8.56355	8.63573	8.81963	8.87714	8.84832	+			+	+		+			cell outer membrane;cell part;external encapsulating structure part;integral to membrane;intrinsic to membrane;membrane;membrane part;outer membrane;plasma membrane				GO:0005886;GO:0009279;GO:0016020;GO:0016021;GO:0019867;GO:0031224;GO:0044425;GO:0044462;GO:0044464		323.31	0	34.285	428300000	522063328	399733344	706310016	3.25021	0.880999	-0.0825332	0.547538	0.0305726	3.2883	-0.217017	1.40006	-0.134484	1.14325	0.113106	3.12597	-0.24759	H9L4R9	>tr|H9L4R9|H9L4R9_VIBCH Outer membrane protein OmpA OS=Vibrio cholerae serotype O1 (strain ATCC 39315 / El Tor Inaba N16961) GN=VC_2213 PE=3 SV=1
7.40761	7.46693	7.47459	7.25508	7.30829	7.31975	7.28466	7.23132	7.08027	7.28409	7.32449	7.25108	+	+	+	+							ABC transporters				ko02010	54.512	0	36.092	28231000	19736666	16108000	19390666	2.1635	2.22847	0.155339	1.74674	0.250965	2.25708	0.163158	0.0960829	0.00781949	0.674538	0.0956264	0.607683	-0.0878069	H9L4S6	>tr|H9L4S6|H9L4S6_VIBCH Ferric vibriobactin ABC transporter, periplasmic ferric vibriobactin-binding protein OS=Vibrio cholerae serotype O1 (strain ATCC 39315 / El Tor Inaba N16961) GN=VC_0776 PE=4 SV=1
8.39559	8.45157	8.41459	8.73738	8.67874	8.79861	8.38735	8.53524	8.48064	8.63148	8.47219	8.6232	+	+		+		+		amine metabolic process;aromatic amino acid family metabolic process;carboxylic acid metabolic process;cellular amine metabolic process;cellular amino acid metabolic process;cellular aromatic compound metabolic process;cellular ketone metabolic process;cellular metabolic process;cellular nitrogen compound metabolic process;cellular process;metabolic process;nitrogen compound metabolic process;org…	4-hydroxyphenylpyruvate dioxygenase activity;binding;catalytic activity;cation binding;dioxygenase activity;ion binding;metal ion binding;oxidoreductase activity;oxidoreductase activity, acting on single donors with incorporation of molecular oxygen;oxidoreductase activity, acting on single donors with incorporation of molecular oxygen, incorporation of two atoms of oxygen		Phenylalanine metabolism;Tyrosine metabolism;Ubiquinone and other terpenoid-quinone biosynthesis	GO:0006082;GO:0006520;GO:0006725;GO:0006807;GO:0008152;GO:0009072;GO:0009308;GO:0009987;GO:0019752;GO:0034641;GO:0042180;GO:0043436;GO:0044106;GO:0044237;GO:0044238;GO:0044281	GO:0003824;GO:0003868;GO:0005488;GO:0016491;GO:0016701;GO:0016702;GO:0043167;GO:0043169;GO:0046872;GO:0051213		ko00130;ko00350;ko00360	323.31	0	41.722	263760000	550806656	296460000	381533344	2.74033	2.93736	-0.31766	0.437661	-0.0471624	1.33536	-0.155039	1.22668	0.162621	2.09094	0.270498	0.733293	-0.107877	H9L4S8	>tr|H9L4S8|H9L4S8_VIBCH 4-hydroxyphenylpyruvate dioxygenase OS=Vibrio cholerae serotype O1 (strain ATCC 39315 / El Tor Inaba N16961) GN=VC_1344 PE=3 SV=1
7.37031	7.41221	7.39808	7.42447	7.3728	7.43201	7.3374	7.34305	7.32282	7.48832	7.45541	7.47262	+		+	+	+	+	+	anatomical structure morphogenesis;cell morphogenesis;cellular component morphogenesis;cellular component organization;cellular component organization or biogenesis;cellular developmental process;cellular process;developmental process				GO:0000902;GO:0009653;GO:0009987;GO:0016043;GO:0032502;GO:0032989;GO:0048869;GO:0071840				142.15	0	36.901	24767334	25736334	21602666	29670666	3.38778	0.29478	-0.0162284	1.9026	0.0591083	2.1419	-0.0785871	1.39191	-0.0623587	1.73814	0.0753366	3.59112	-0.137695	H9L4S9	>tr|H9L4S9|H9L4S9_VIBCH Rod shape-determining protein MreB OS=Vibrio cholerae serotype O1 (strain ATCC 39315 / El Tor Inaba N16961) GN=VC_0415 PE=4 SV=1
7.55783	7.56157	7.63706	7.70975	7.68153	7.66435	7.65319	7.74638	7.81737	7.70296	7.74345	7.67301	+	+	+	+							Vibrio cholerae pathogenic cycle				ko05111	177.6	0	20.429	38641000	48486000	55478332	50984332	1.51005	1.57944	-0.0997256	1.3281	-0.153493	1.6724	-0.120988	0.365093	-0.0212628	0.472211	-0.0537678	0.248806	0.032505	H9L4T0	>tr|H9L4T0|H9L4T0_VIBCH Uncharacterized protein OS=Vibrio cholerae serotype O1 (strain ATCC 39315 / El Tor Inaba N16961) GN=VC_2647 PE=4 SV=1
7.44803	7.32646	7.31057	7.34498	7.30341	7.21283	7.20227	7.1116	7.09785	7.14376	7.12379	7.25505	+		+	+		+										36.697	0	11.558	23235334	19521334	13796333	15071000	1.88677	0.568163	0.0746102	1.83771	0.224445	1.46015	0.187482	0.93437	0.112871	1.37328	0.149835	0.284749	-0.0369633	H9L4T2	>tr|H9L4T2|H9L4T2_VIBCH MSHA biogenesis protein MshK OS=Vibrio cholerae serotype O1 (strain ATCC 39315 / El Tor Inaba N16961) GN=VC_0401 PE=4 SV=1
6.70085	6.60465	6.66078	6.64165	6.65705	6.67635	6.79607	6.82191	6.42131	6.92667	6.98568	6.91814	+			+	+			alcohol metabolic process;benzene-containing compound metabolic process;biosynthetic process;catechol-containing compound metabolic process;cellular aromatic compound metabolic process;cellular biosynthetic process;cellular metabolic process;cellular process;cofactor biosynthetic process;cofactor metabolic process;diol metabolic process;metabolic process;nonribosomal peptide biosynthetic process;…	catalytic activity;intramolecular transferase activity;intramolecular transferase activity, transferring hydroxy groups;isochorismate synthase activity;isomerase activity		Biosynthesis of siderophore group nonribosomal peptides;Ubiquinone and other terpenoid-quinone biosynthesis	GO:0006066;GO:0006518;GO:0006725;GO:0008152;GO:0009058;GO:0009237;GO:0009712;GO:0009987;GO:0018958;GO:0019184;GO:0019290;GO:0019536;GO:0019537;GO:0019540;GO:0034311;GO:0042537;GO:0043043;GO:0044237;GO:0044249;GO:0044281;GO:0051186;GO:0051188	GO:0003824;GO:0008909;GO:0016853;GO:0016866;GO:0050486		ko00130;ko01053	13.83	0	43.593	4.54157e+06	4.55597e+06	5175700	8801367	1.36388	0.0332798	-0.00292222	0.0639351	-0.0243389	2.92224	-0.288071	3.57827	-0.285148	0.0570108	-0.0214167	0.940335	-0.263732	O07898	>sp|O07898|VIBC_VIBCH Vibriobactin-specific isochorismate synthase OS=Vibrio cholerae serotype O1 (strain ATCC 39315 / El Tor Inaba N16961) GN=vibC PE=3 SV=1
8.06156	8.02428	8.05584	8.03651	8.02011	7.94256	8.13605	8.15122	8.06134	8.13991	8.08138	8.07933	+				+	+		alcohol metabolic process;benzene-containing compound metabolic process;biosynthetic process;catechol-containing compound metabolic process;cellular aromatic compound metabolic process;cellular biosynthetic process;cellular metabolic process;cellular process;cofactor biosynthetic process;cofactor metabolic process;diol metabolic process;metabolic process;nonribosomal peptide biosynthetic process;…	(2,3-dihydroxybenzoyl)adenylate synthase activity;adenylyltransferase activity;catalytic activity;ligase activity;nucleotidyltransferase activity;transferase activity;transferase activity, transferring phosphorus-containing groups	cell part;integral to membrane;intrinsic to membrane;membrane;membrane part;plasma membrane	Biosynthesis of siderophore group nonribosomal peptides	GO:0006066;GO:0006518;GO:0006725;GO:0008152;GO:0009058;GO:0009237;GO:0009712;GO:0009987;GO:0018958;GO:0019184;GO:0019290;GO:0019536;GO:0019537;GO:0019540;GO:0034311;GO:0042537;GO:0043043;GO:0044237;GO:0044249;GO:0044281;GO:0051186;GO:0051188	GO:0003824;GO:0008668;GO:0016740;GO:0016772;GO:0016779;GO:0016874;GO:0070566	GO:0005886;GO:0016020;GO:0016021;GO:0031224;GO:0044425;GO:0044464	ko01053	323.31	0	60.065	111566664	100374000	131203336	126220000	1.56884	0.693306	0.0474989	1.07718	-0.0689758	1.08306	-0.0529792	1.33814	-0.100478	1.3562	-0.116475	0.177926	0.0159966	O07899	>sp|O07899|VIBE_VIBCH Vibriobactin-specific 2,3-dihydroxybenzoate-AMP ligase OS=Vibrio cholerae serotype O1 (strain ATCC 39315 / El Tor Inaba N16961) GN=vibE PE=3 SV=1
8.46969	8.4138	8.38409	8.39005	8.35332	8.31439	7.9813	7.89316	8.07871	7.88258	8.03487	8.00333	+		+	+	+	+		cellular macromolecule metabolic process;cellular metabolic process;cellular process;cellular protein metabolic process;macromolecule metabolic process;metabolic process;primary metabolic process;protein folding;protein metabolic process;response to stimulus;response to stress	adenyl nucleotide binding;adenyl-nucleotide exchange factor activity;ATPase regulator activity;binding;enzyme regulator activity;nucleoside-triphosphatase regulator activity;nucleotide binding;purine nucleotide binding	cell part;cytoplasm;intracellular part		GO:0006457;GO:0006950;GO:0008152;GO:0009987;GO:0019538;GO:0043170;GO:0044237;GO:0044238;GO:0044260;GO:0044267;GO:0050896	GO:0000166;GO:0000774;GO:0005488;GO:0017076;GO:0030234;GO:0030554;GO:0060589;GO:0060590	GO:0005737;GO:0044424;GO:0044464		119.79	0	22.659	265453344	225780000	97949000	95146664	4.3038	0.985466	0.0699368	2.75091	0.438135	2.98038	0.448932	2.74744	0.378995	2.5048	0.368199	0.0524076	0.0107962	O30862	>sp|O30862|GRPE_VIBCH Protein GrpE OS=Vibrio cholerae serotype O1 (strain ATCC 39315 / El Tor Inaba N16961) GN=grpE PE=3 SV=2
7.94552	7.87003	7.85704	7.92336	7.90372	7.85468	7.76702	7.8028	7.83573	7.74075	7.73761	7.77057	+			+	+	+		alcohol catabolic process;alcohol metabolic process;amino sugar catabolic process;amino sugar metabolic process;carbohydrate catabolic process;carbohydrate metabolic process;carboxylic acid metabolic process;catabolic process;cellular carbohydrate catabolic process;cellular carbohydrate metabolic process;cellular ketone metabolic process;cellular metabolic process;cellular process;glucosamine cat…	binding;catalytic activity;cation binding;deacetylase activity;hydrolase activity;hydrolase activity, acting on carbon-nitrogen (but not peptide) bonds;hydrolase activity, acting on carbon-nitrogen (but not peptide) bonds, in linear amides;ion binding;metal ion binding;N-acetylglucosamine-6-phosphate deacetylase activity		Amino sugar and nucleotide sugar metabolism	GO:0005975;GO:0005996;GO:0006040;GO:0006041;GO:0006043;GO:0006044;GO:0006046;GO:0006054;GO:0006066;GO:0006082;GO:0008152;GO:0009056;GO:0009987;GO:0016052;GO:0019262;GO:0019752;GO:0042180;GO:0043436;GO:0044237;GO:0044238;GO:0044262;GO:0044275;GO:0044281;GO:0044282;GO:0046164;GO:0046348;GO:0046365	GO:0003824;GO:0005488;GO:0008448;GO:0016787;GO:0016810;GO:0016811;GO:0019213;GO:0043167;GO:0043169;GO:0046872		ko00520	123.12	0	40.955	78099664	78500336	63497668	56221332	2.58937	0.0299714	-0.00305669	1.23043	0.0890123	2.05811	0.14122	2.48443	0.144276	1.49663	0.092069	1.09343	0.0522075	O32445	>sp|O32445|NAGA_VIBCH N-acetylglucosamine-6-phosphate deacetylase OS=Vibrio cholerae serotype O1 (strain ATCC 39315 / El Tor Inaba N16961) GN=nagA PE=1 SV=2
8.10944	8.00342	8.02321	8.20973	8.10718	8.28773	8.26961	8.23086	8.38855	8.16982	8.15694	8.06506	+		+				+	biosynthetic process;cellular biosynthetic process;cellular macromolecule biosynthetic process;cellular macromolecule metabolic process;cellular metabolic process;cellular process;cellular protein metabolic process;macromolecule biosynthetic process;macromolecule metabolic process;metabolic process;primary metabolic process;protein metabolic process;translation	binding;nucleic acid binding;RNA binding;rRNA binding;structural constituent of ribosome;structural molecule activity	cell part;cytoplasmic part;intracellular non-membrane-bounded organelle;intracellular organelle;intracellular part;macromolecular complex;non-membrane-bounded organelle;organelle;ribonucleoprotein complex;ribosome	Ribosome	GO:0006412;GO:0008152;GO:0009058;GO:0009059;GO:0009987;GO:0019538;GO:0034645;GO:0043170;GO:0044237;GO:0044238;GO:0044249;GO:0044260;GO:0044267	GO:0003676;GO:0003723;GO:0003735;GO:0005198;GO:0005488;GO:0019843	GO:0005840;GO:0030529;GO:0032991;GO:0043226;GO:0043228;GO:0043229;GO:0043232;GO:0044424;GO:0044444;GO:0044464	ko03010	71.967	0	9.5101	111646664	161346672	200283328	135846672	1.78645	1.19214	-0.156189	1.91935	-0.250979	0.854935	-0.0852496	0.501516	0.0709397	0.601161	-0.0947898	1.3415	0.16573	O34239	>sp|O34239|RS20_VIBCH 30S ribosomal protein S20 OS=Vibrio cholerae serotype O1 (strain ATCC 39315 / El Tor Inaba N16961) GN=rpsT PE=3 SV=2
9.24966	9.2652	9.27189	9.28912	9.28251	9.31018	8.98334	8.98902	9.03439	8.93849	8.96608	8.98768	+	+	+	+	+	+		cellular macromolecule metabolic process;cellular metabolic process;cellular process;cellular protein metabolic process;macromolecule metabolic process;metabolic process;primary metabolic process;protein folding;protein metabolic process;response to stimulus;response to stress	adenyl nucleotide binding;adenyl ribonucleotide binding;ATP binding;binding;nucleotide binding;purine nucleotide binding;purine ribonucleoside triphosphate binding;purine ribonucleotide binding;ribonucleotide binding		ko05152;RNA degradation	GO:0006457;GO:0006950;GO:0008152;GO:0009987;GO:0019538;GO:0043170;GO:0044237;GO:0044238;GO:0044260;GO:0044267;GO:0050896	GO:0000166;GO:0005488;GO:0005524;GO:0017076;GO:0030554;GO:0032553;GO:0032555;GO:0032559;GO:0035639		ko03018;ko05152	323.31	0	68.76	1829566720	1968333312	1006603328	921616704	7.1686	1.3907	-0.031689	3.92829	0.259998	4.34592	0.298164	4.4324	0.329853	4.05432	0.291687	0.821147	0.0381657	O34241	>sp|O34241|DNAK_VIBCH Chaperone protein DnaK OS=Vibrio cholerae serotype O1 (strain ATCC 39315 / El Tor Inaba N16961) GN=dnaK PE=3 SV=2
6.62053	6.66611	6.675	6.53601	6.70579	6.53605	6.53512	6.41549	6.37394	6.72804	6.71098	6.65229	+		+				+	biosynthetic process;cellular biosynthetic process;cellular macromolecule biosynthetic process;cellular macromolecule metabolic process;cellular metabolic process;cellular nitrogen compound metabolic process;cellular process;cellular protein metabolic process;DNA metabolic process;DNA replication;macromolecule biosynthetic process;macromolecule metabolic process;metabolic process;nitrogen compoun…	adenyl nucleotide binding;adenyl ribonucleotide binding;ATP binding;binding;cation binding;ion binding;metal ion binding;nucleotide binding;purine nucleotide binding;purine ribonucleoside triphosphate binding;purine ribonucleotide binding;ribonucleotide binding;transition metal ion binding;zinc ion binding	cell part;cytoplasm;intracellular part		GO:0006139;GO:0006259;GO:0006260;GO:0006457;GO:0006807;GO:0006950;GO:0008152;GO:0009058;GO:0009059;GO:0009266;GO:0009408;GO:0009628;GO:0009987;GO:0019538;GO:0034641;GO:0034645;GO:0043170;GO:0044237;GO:0044238;GO:0044249;GO:0044260;GO:0044267;GO:0050896;GO:0090304	GO:0000166;GO:0005488;GO:0005524;GO:0008270;GO:0017076;GO:0030554;GO:0032553;GO:0032555;GO:0032559;GO:0035639;GO:0043167;GO:0043169;GO:0046872;GO:0046914	GO:0005737;GO:0044424;GO:0044464		54.833	0	40.822	4.51363e+06	3983600	2799100	4.99223e+06	2.04462	0.446	0.0612604	1.84582	0.212362	0.691055	-0.043222	0.789909	-0.104482	0.950375	0.151102	2.05633	-0.255584	O34242	>sp|O34242|DNAJ_VIBCH Chaperone protein DnaJ OS=Vibrio cholerae serotype O1 (strain ATCC 39315 / El Tor Inaba N16961) GN=dnaJ PE=3 SV=2
6.92685	7.00689	7.05568	7.12182	7.067	7.01974	7.21514	7.13405	7.24638	7.12415	7.29495	7.20344	+		+	+		+		biosynthetic process;cellular biosynthetic process;cellular macromolecule biosynthetic process;cellular macromolecule metabolic process;cellular metabolic process;cellular nitrogen compound metabolic process;cellular process;macromolecule biosynthetic process;macromolecule metabolic process;metabolic process;nitrogen compound metabolic process;nucleic acid metabolic process;nucleobase-containing …	binding;DNA binding;nucleic acid binding;nucleic acid binding transcription factor activity;sequence-specific DNA binding;sequence-specific DNA binding transcription factor activity			GO:0006139;GO:0006351;GO:0006807;GO:0008152;GO:0009058;GO:0009059;GO:0009987;GO:0016070;GO:0032774;GO:0034641;GO:0034645;GO:0043170;GO:0044237;GO:0044238;GO:0044249;GO:0044260;GO:0090304	GO:0001071;GO:0003676;GO:0003677;GO:0003700;GO:0005488;GO:0043565			229.12	0	12.746	9992600	11790333	15887333	16335333	1.93862	0.697129	-0.0730446	1.79821	-0.202045	1.56542	-0.211038	1.12878	-0.137993	1.35166	-0.129001	0.051865	-0.00899235	O34419	>sp|O34419|RSTR_VIBCH Cryptic phage CTXphi transcriptional repressor RstR OS=Vibrio cholerae serotype O1 (strain ATCC 39315 / El Tor Inaba N16961) GN=rstR1 PE=4 SV=1
6.68424	6.76208	6.67038	6.56893	6.60268	6.65198	6.85971	6.77815	6.62131	6.95526	6.91268	6.85505	+			+	+			establishment of localization;transport	cation transmembrane transporter activity;inorganic cation transmembrane transporter activity;ion transmembrane transporter activity;iron ion transmembrane transporter activity;metal ion transmembrane transporter activity;protein transporter activity;substrate-specific transmembrane transporter activity;substrate-specific transporter activity;transition metal ion transmembrane transporter activit…	cell part;external encapsulating structure part;integral to membrane;intrinsic to membrane;membrane;membrane part;outer membrane-bounded periplasmic space;periplasmic space;plasma membrane		GO:0006810;GO:0051234	GO:0005215;GO:0005381;GO:0008324;GO:0008565;GO:0015075;GO:0022857;GO:0022890;GO:0022891;GO:0022892;GO:0046873;GO:0046915	GO:0005886;GO:0016020;GO:0016021;GO:0030288;GO:0031224;GO:0042597;GO:0044425;GO:0044462;GO:0044464		57.884	0	26.541	5.09897e+06	4.06637e+06	5.80697e+06	8120600	2.18208	1.22846	0.0977105	0.248907	-0.0474876	2.11431	-0.202089	2.86636	-0.299799	0.916363	-0.145198	0.955467	-0.154601	O52042	>sp|O52042|TONB_VIBCH Protein TonB OS=Vibrio cholerae serotype O1 (strain ATCC 39315 / El Tor Inaba N16961) GN=tonB PE=3 SV=2
7.85588	7.85812	7.82274	7.69626	7.87653	7.87381	8.02531	8.04139	8.00647	7.90164	7.90252	7.98215	+		+	+		+	+	2'-deoxyribonucleotide biosynthetic process;2'-deoxyribonucleotide metabolic process;biosynthetic process;cellular biosynthetic process;cellular metabolic process;cellular nitrogen compound biosynthetic process;cellular nitrogen compound metabolic process;cellular process;deoxyribonucleoside monophosphate biosynthetic process;deoxyribonucleoside monophosphate metabolic process;deoxyribonucleoside…	5,10-methylenetetrahydrofolate-dependent methyltransferase activity;catalytic activity;methyltransferase activity;thymidylate synthase activity;transferase activity;transferase activity, transferring one-carbon groups	cell part;cytoplasm;intracellular part	One carbon pool by folate;Pyrimidine metabolism	GO:0006139;GO:0006220;GO:0006221;GO:0006231;GO:0006235;GO:0006753;GO:0006807;GO:0008152;GO:0009058;GO:0009117;GO:0009123;GO:0009124;GO:0009129;GO:0009130;GO:0009141;GO:0009142;GO:0009147;GO:0009148;GO:0009157;GO:0009162;GO:0009165;GO:0009176;GO:0009177;GO:0009200;GO:0009202;GO:0009211;GO:0009212;GO:0009219;GO:0009221;GO:0009262;GO:0009263;GO:0009265;GO:0009394;GO:0009987;GO:0018130;GO:0034641;GO:…	GO:0003824;GO:0004799;GO:0008168;GO:0016740;GO:0016741;GO:0042083	GO:0005737;GO:0044424;GO:0044464	ko00240;ko00670	114.71	0	32.573	70126000	66576332	105833336	85201000	2.03417	0.189264	0.0300436	3.51843	-0.178808	1.34007	-0.0831922	0.800971	-0.113236	1.58514	-0.208851	1.54448	0.0956154	O66108	>sp|O66108|TYSY_VIBCH Thymidylate synthase OS=Vibrio cholerae serotype O1 (strain ATCC 39315 / El Tor Inaba N16961) GN=thyA PE=3 SV=1
7.34498	7.33696	7.26569	7.12493	7.3794	7.32844	7.09896	7.06093	6.97495	7.34242	7.40468	7.41551	+		+				+			cell outer membrane;cell part;external encapsulating structure part;membrane;outer membrane;plasma membrane				GO:0005886;GO:0009279;GO:0016020;GO:0019867;GO:0044462;GO:0044464		54.881	0	28.111	20764000	19530334	11168200	24474334	2.3937	0.177974	0.0382889	2.43419	0.270933	0.989216	-0.0716594	0.608711	-0.109948	1.26984	0.232644	2.86479	-0.342592	P06111	>sp|P06111|OMPV_VIBCH Outer membrane protein OmpV OS=Vibrio cholerae serotype O1 (strain ATCC 39315 / El Tor Inaba N16961) GN=ompV PE=1 SV=1
8.41108	8.52225	8.36468	8.42308	8.44888	8.45723	8.36156	8.37258	8.4532	8.62266	8.60074	8.56496	+			+	+		+	cell death;cell killing;cellular process;cytolysis;cytolysis in other organism;death;hemolysis in other organism;killing of cells of other organism;multi-organism process		cell part;extracellular region part;host cell membrane;host cell part;host cell plasma membrane;integral to membrane;intrinsic to membrane;membrane part;other organism cell membrane;other organism membrane;other organism part	NOD-like receptor signaling pathway;Vibrio cholerae infection	GO:0001906;GO:0008219;GO:0009987;GO:0016265;GO:0019835;GO:0031640;GO:0044179;GO:0051704;GO:0051715		GO:0016021;GO:0020002;GO:0031224;GO:0033643;GO:0033644;GO:0044217;GO:0044218;GO:0044279;GO:0044421;GO:0044425;GO:0044464	ko04621;ko05110	323.31	0	81.961	274033344	277526656	249883328	395156672	2.24437	0.0763754	-0.0103928	0.268592	0.0368923	1.51977	-0.163452	2.82928	-0.153059	0.703641	0.0472851	2.40935	-0.200344	P09545	>sp|P09545|HLYA_VIBCH Hemolysin OS=Vibrio cholerae serotype O1 (strain ATCC 39315 / El Tor Inaba N16961) GN=hlyA PE=1 SV=2
8.47407	8.34171	8.42966	8.62098	8.50077	8.51493	8.64751	8.51768	8.63182	8.50806	8.50387	8.44362	+		+					biosynthetic process;cellular biosynthetic process;cellular macromolecule biosynthetic process;cellular macromolecule metabolic process;cellular metabolic process;cellular process;cellular protein metabolic process;macromolecule biosynthetic process;macromolecule metabolic process;metabolic process;primary metabolic process;protein metabolic process;translation	binding;nucleic acid binding;RNA binding;rRNA binding;structural constituent of ribosome;structural molecule activity	cell part;cytoplasmic part;intracellular non-membrane-bounded organelle;intracellular organelle;intracellular part;macromolecular complex;non-membrane-bounded organelle;organelle;ribonucleoprotein complex;ribosome	Ribosome	GO:0006412;GO:0008152;GO:0009058;GO:0009059;GO:0009987;GO:0019538;GO:0034645;GO:0043170;GO:0044237;GO:0044238;GO:0044249;GO:0044260;GO:0044267	GO:0003676;GO:0003723;GO:0003735;GO:0005198;GO:0005488;GO:0019843	GO:0005840;GO:0030529;GO:0032991;GO:0043226;GO:0043228;GO:0043229;GO:0043232;GO:0044424;GO:0044444;GO:0044464	ko03010	36.937	0	13.366	262160000	353963328	400623328	306313344	1.50461	1.12899	-0.130415	1.50635	-0.183859	0.726916	-0.0700388	0.628269	0.0603765	0.406345	-0.0534436	1.16595	0.11382	P0A479	>sp|P0A479|RL20_VIBCH 50S ribosomal protein L20 OS=Vibrio cholerae serotype O1 (strain ATCC 39315 / El Tor Inaba N16961) GN=rplT PE=3 SV=1
7.35434	7.20409	7.30891	7.35457	7.32025	7.54791	7.58626	7.58703	7.64852	7.47197	7.43351	7.54679	+		+	+			+	biosynthetic process;cellular biosynthetic process;cellular metabolic process;cellular process;coenzyme biosynthetic process;coenzyme metabolic process;cofactor biosynthetic process;cofactor metabolic process;heterocycle metabolic process;metabolic process;pyridoxal phosphate biosynthetic process;pyridoxal phosphate metabolic process;pyridoxine biosynthetic process;pyridoxine metabolic process;sm…	binding;catalytic activity;coenzyme binding;cofactor binding;erythrose-4-phosphate dehydrogenase activity;NAD binding;nucleotide binding;oxidoreductase activity;oxidoreductase activity, acting on the aldehyde or oxo group of donors;oxidoreductase activity, acting on the aldehyde or oxo group of donors, NAD or NADP as acceptor	cell part;cytoplasm;intracellular part	Vitamin B6 metabolism	GO:0006732;GO:0006766;GO:0006767;GO:0008152;GO:0008614;GO:0008615;GO:0009058;GO:0009108;GO:0009110;GO:0009987;GO:0042364;GO:0042816;GO:0042819;GO:0042822;GO:0042823;GO:0044237;GO:0044249;GO:0044281;GO:0044283;GO:0046483;GO:0051186;GO:0051188	GO:0000166;GO:0003824;GO:0005488;GO:0016491;GO:0016620;GO:0016903;GO:0048001;GO:0048037;GO:0050662;GO:0051287	GO:0005737;GO:0044424;GO:0044464	ko00750	98.202	0	37.772	19659000	26280000	40575332	30666666	2.12276	0.638736	-0.118464	2.53618	-0.318155	1.60793	-0.194977	0.416015	-0.0765131	1.26942	-0.199691	1.46101	0.123178	P0C6C2	>sp|P0C6C2|E4PD_VIBCH D-erythrose-4-phosphate dehydrogenase OS=Vibrio cholerae serotype O1 (strain ATCC 39315 / El Tor Inaba N16961) GN=epd PE=3 SV=1
9.44801	9.461	9.46069	9.41794	9.43596	9.37965	9.50371	9.49065	9.54128	9.49967	9.55099	9.51763	+		+	+	+	+		cell motility;cell projection organization;cellular component movement;cellular component organization;cellular component organization at cellular level;cellular component organization or biogenesis;cellular component organization or biogenesis at cellular level;cellular process;ciliary or flagellar motility;flagellum organization;locomotion	structural molecule activity	bacterial-type flagellum filament;bacterial-type flagellum part;cell part;cell projection part;extracellular region;flagellum part;intracellular part;organelle part	Flagellar assembly;Plant-pathogen interaction;Two-component system	GO:0001539;GO:0006928;GO:0009987;GO:0016043;GO:0030030;GO:0040011;GO:0043064;GO:0048870;GO:0071840;GO:0071841;GO:0071842	GO:0005198	GO:0005576;GO:0009420;GO:0044422;GO:0044424;GO:0044460;GO:0044461;GO:0044463;GO:0044464	ko02020;ko02040;ko04626	323.31	0	39.905	2861600000	2581133312	3253966592	3336466688	2.85373	1.24306	0.0453863	1.6069	-0.0553112	1.87561	-0.0661964	2.11999	-0.111583	1.95795	-0.100698	0.195734	-0.0108852	P0C6C5	>sp|P0C6C5|FLAC_VIBCH Flagellin C OS=Vibrio cholerae serotype O1 (strain ATCC 39315 / El Tor Inaba N16961) GN=flaC PE=3 SV=1
7.31357	7.4444	7.26673	7.39712	7.47815	7.43449	6.81941	7.05873	6.75113	7.02506	6.93804	6.89811	+		+	+	+	+		cell motility;cell projection organization;cellular component movement;cellular component organization;cellular component organization at cellular level;cellular component organization or biogenesis;cellular component organization or biogenesis at cellular level;cellular process;ciliary or flagellar motility;flagellum organization;locomotion	structural molecule activity	bacterial-type flagellum filament;bacterial-type flagellum part;cell part;cell projection part;extracellular region;flagellum part;intracellular part;organelle part	Flagellar assembly;Plant-pathogen interaction;Two-component system	GO:0001539;GO:0006928;GO:0009987;GO:0016043;GO:0030030;GO:0040011;GO:0043064;GO:0048870;GO:0071840;GO:0071841;GO:0071842	GO:0005198	GO:0005576;GO:0009420;GO:0044422;GO:0044424;GO:0044460;GO:0044461;GO:0044463;GO:0044464	ko02020;ko02040;ko04626	209.2	0	41.042	22296666	27406334	7894700	9057700	3.55937	0.751387	-0.0950195	1.90935	0.465142	2.4008	0.387832	3.39961	0.482852	2.36408	0.560162	0.314541	-0.0773099	P0C6C7	>sp|P0C6C7|FLAE_VIBCH Flagellin E OS=Vibrio cholerae serotype O1 (strain ATCC 39315 / El Tor Inaba N16961) GN=flaE PE=3 SV=1
7.91441	8.02922	7.98112	7.9188	7.98745	7.95117	7.87226	7.81764	7.70621	7.88421	7.92414	7.87065	+		+			+		alcohol metabolic process;benzene-containing compound metabolic process;biosynthetic process;catechol-containing compound metabolic process;cellular aromatic compound metabolic process;cellular biosynthetic process;cellular metabolic process;cellular process;cofactor biosynthetic process;cofactor metabolic process;diol metabolic process;metabolic process;nonribosomal peptide biosynthetic process;…	catalytic activity;ether hydrolase activity;hydrolase activity;hydrolase activity, acting on ether bonds;isochorismatase activity;leukotriene-A4 hydrolase activity		Biosynthesis of siderophore group nonribosomal peptides	GO:0006066;GO:0006518;GO:0006725;GO:0008152;GO:0009058;GO:0009237;GO:0009712;GO:0009987;GO:0018958;GO:0019184;GO:0019290;GO:0019536;GO:0019537;GO:0019540;GO:0034311;GO:0042537;GO:0043043;GO:0044237;GO:0044249;GO:0044281;GO:0051186;GO:0051188	GO:0003824;GO:0004463;GO:0008908;GO:0016787;GO:0016801;GO:0016803		ko01053	195.69	0	32.553	94939336	89821664	63690000	78270664	1.71346	0.226564	0.0224414	1.3902	0.176212	1.0411	0.081916	1.0961	0.0594746	1.36243	0.153771	0.851844	-0.094296	P0C6D3	>sp|P0C6D3|VIBB_VIBCH Vibriobactin-specific isochorismatase OS=Vibrio cholerae serotype O1 (strain ATCC 39315 / El Tor Inaba N16961) GN=vibB PE=1 SV=1
6.80411	6.91288	6.9878	7.05956	6.99284	6.93374	6.5843	6.52785	6.67025	6.88873	6.88506	6.86388	+		+		+	+	+									34.494	0	17.319	8.09163e+06	9963867	3963800	7.57463e+06	3.36205	0.657983	-0.0937867	1.98371	0.307466	0.155332	0.0223721	1.4519	0.116159	2.72395	0.401252	2.60461	-0.285094	P0C6D4	>sp|P0C6D4|FLAG_VIBCH Protein FlaG OS=Vibrio cholerae serotype O1 (strain ATCC 39315 / El Tor Inaba N16961) GN=flaG PE=4 SV=1
7.01477	7.03007	7.07824	6.90532	7.09304	7.1117	7.07	7.11813	6.97272	7.38579	7.36803	7.33953	+			+	+		+	cation transport;establishment of localization;ion transport;metal ion transport;monovalent inorganic cation transport;sodium ion transport;transport	binding;catalytic activity;coenzyme binding;cofactor binding;FMN binding;nucleotide binding;oxidoreductase activity;oxidoreductase activity, acting on NADH or NADPH;oxidoreductase activity, acting on NADH or NADPH, quinone or similar compound as acceptor	cell part;cell wall;external encapsulating structure;Gram-negative-bacterium-type cell wall;integral to membrane;intrinsic to membrane;membrane;membrane part;peptidoglycan-based cell wall;plasma membrane		GO:0006810;GO:0006811;GO:0006812;GO:0006814;GO:0015672;GO:0030001;GO:0051234	GO:0000166;GO:0003824;GO:0005488;GO:0010181;GO:0016491;GO:0016651;GO:0016655;GO:0048037;GO:0050662	GO:0005618;GO:0005886;GO:0009274;GO:0009276;GO:0016020;GO:0016021;GO:0030312;GO:0031224;GO:0044425;GO:0044464		105.53	0	27.619	11012333	11121067	11422067	23166666	2.95359	0.0211021	0.00434303	0.0961372	-0.0125899	3.79967	-0.323419	2.08597	-0.327762	0.0757735	-0.016933	2.64324	-0.310829	P0C6E0	>sp|P0C6E0|NQRC_VIBCH Na(+)-translocating NADH-quinone reductase subunit C OS=Vibrio cholerae serotype O1 (strain ATCC 39315 / El Tor Inaba N16961) GN=nqrC PE=1 SV=1
7.88927	8.0038	7.91562	7.92953	7.8845	7.83674	7.8496	7.91114	7.99309	8.05618	8.10531	8.07598	+			+	+		+		binding;carbohydrate binding;monosaccharide binding;sialic acid binding;sugar binding	extracellular region	Lysosome;Other glycan degradation;Sphingolipid metabolism		GO:0005488;GO:0005529;GO:0030246;GO:0033691;GO:0048029	GO:0005576	ko00511;ko00600;ko04142	323.31	0	85.608	86905336	76777664	83549000	120123336	2.01858	0.529398	0.0526458	0.123602	0.0182896	1.72474	-0.142925	2.52493	-0.195571	0.279479	-0.0343563	1.66924	-0.161215	P0C6E9	>sp|P0C6E9|NANH_VIBCH Sialidase OS=Vibrio cholerae serotype O1 (strain ATCC 39315 / El Tor Inaba N16961) GN=nanH PE=1 SV=1
8.23598	8.2754	8.37702	8.27467	8.02649	8.21018	7.72479	7.78633	7.74862	7.50881	7.55455	7.03362	+		+	+	+	+		biological regulation;cell redox homeostasis;cellular homeostasis;cellular process;homeostatic process;regulation of biological process;regulation of biological quality;regulation of cellular process	antioxidant activity;catalytic activity;oxidoreductase activity;oxidoreductase activity, acting on paired donors, with incorporation or reduction of molecular oxygen;oxidoreductase activity, acting on peroxide as acceptor;peroxidase activity;peroxiredoxin activity;thioredoxin peroxidase activity			GO:0009987;GO:0019725;GO:0042592;GO:0045454;GO:0050789;GO:0050794;GO:0065007;GO:0065008	GO:0003824;GO:0004601;GO:0008379;GO:0016209;GO:0016491;GO:0016684;GO:0016705;GO:0051920			323.31	0	17.924	199653328	152253328	56753332	26310334	3.36741	0.667479	0.125686	3.54231	0.542885	2.24971	0.930472	1.93639	0.804785	2.26069	0.417199	1.08787	0.387587	P0C6P9	>sp|P0C6P9|TPX_VIBCH Thiol peroxidase OS=Vibrio cholerae serotype O1 (strain ATCC 39315 / El Tor Inaba N16961) GN=tpx PE=3 SV=1
8.95459	8.97718	8.94526	8.91948	8.94174	8.93595	8.76793	8.80246	8.7544	8.75052	8.70741	8.72537	+		+	+	+	+		amine metabolic process;amino acid activation;carboxylic acid metabolic process;cellular amine metabolic process;cellular amino acid metabolic process;cellular ketone metabolic process;cellular macromolecule metabolic process;cellular metabolic process;cellular nitrogen compound metabolic process;cellular process;glutamyl-tRNA aminoacylation;macromolecule metabolic process;metabolic process;ncRNA…	adenyl nucleotide binding;adenyl ribonucleotide binding;aminoacyl-tRNA ligase activity;ATP binding;binding;catalytic activity;glutamate-tRNA ligase activity;ligase activity;ligase activity, forming aminoacyl-tRNA and related compounds;ligase activity, forming carbon-oxygen bonds;nucleic acid binding;nucleotide binding;purine nucleotide binding;purine ribonucleoside triphosphate binding;purine rib…	cell part;cytoplasm;intracellular part	Aminoacyl-tRNA biosynthesis;Porphyrin and chlorophyll metabolism	GO:0006082;GO:0006139;GO:0006399;GO:0006418;GO:0006424;GO:0006520;GO:0006807;GO:0008152;GO:0009308;GO:0009987;GO:0016070;GO:0019752;GO:0034641;GO:0034660;GO:0042180;GO:0043038;GO:0043039;GO:0043170;GO:0043436;GO:0044106;GO:0044237;GO:0044238;GO:0044260;GO:0044281;GO:0090304	GO:0000049;GO:0000166;GO:0003676;GO:0003723;GO:0003824;GO:0004812;GO:0004818;GO:0005488;GO:0005524;GO:0016874;GO:0016875;GO:0016876;GO:0017076;GO:0030554;GO:0032553;GO:0032555;GO:0032559;GO:0035639	GO:0005737;GO:0044424;GO:0044464	ko00860;ko00970	323.31	0	53.378	910369984	856033344	596220032	534716640	6.04822	1.08032	0.0266218	3.36863	0.184079	3.90935	0.231248	3.87413	0.204626	3.24613	0.157457	1.16736	0.047169	P0C6Q1	>sp|P0C6Q1|SYE_VIBCH Glutamate--tRNA ligase OS=Vibrio cholerae serotype O1 (strain ATCC 39315 / El Tor Inaba N16961) GN=gltX PE=3 SV=1
8.56354	8.52867	8.54406	8.55838	8.61319	8.61477	8.38351	8.47897	8.45137	8.19833	8.27342	8.30899	+		+	+	+	+	+	biological regulation;cation homeostasis;cellular metabolic process;cellular process;chemical homeostasis;cofactor metabolic process;establishment of localization;homeostatic process;ion homeostasis;ion transport;iron ion homeostasis;metabolic process;regulation of biological quality;siderophore metabolic process;transport;vibriobactin metabolic process	catalytic activity;oxidoreductase activity	cell part;cytoplasm;intracellular part		GO:0006810;GO:0006811;GO:0008152;GO:0009237;GO:0009987;GO:0019536;GO:0042592;GO:0044237;GO:0048878;GO:0050801;GO:0051186;GO:0051234;GO:0055072;GO:0055080;GO:0065007;GO:0065008	GO:0003824;GO:0016491	GO:0005737;GO:0044424;GO:0044464		106.03	0	30.514	351283328	394663328	275280000	183086672	4.35586	1.11467	-0.0500244	1.63128	0.107472	2.94953	0.285177	3.06158	0.335202	2.0144	0.157496	1.83217	0.177705	P0C6Q2	>sp|P0C6Q2|VIUB_VIBCH Vibriobactin utilization protein ViuB OS=Vibrio cholerae serotype O1 (strain ATCC 39315 / El Tor Inaba N16961) GN=viuB PE=3 SV=1
9.21376	9.18041	9.16337	9.20957	9.20656	9.22968	9.21397	9.19524	9.23649	9.10673	9.07019	9.12943	+			+	+		+	alcohol catabolic process;alcohol metabolic process;carbohydrate catabolic process;carbohydrate metabolic process;catabolic process;cellular carbohydrate catabolic process;cellular carbohydrate metabolic process;cellular metabolic process;cellular process;generation of precursor metabolites and energy;glucose catabolic process;glucose metabolic process;glycolysis;hexose catabolic process;hexose m…	adenyl nucleotide binding;adenyl ribonucleotide binding;ATP binding;binding;catalytic activity;kinase activity;nucleotide binding;phosphoglycerate kinase activity;phosphotransferase activity, carboxyl group as acceptor;purine nucleotide binding;purine ribonucleoside triphosphate binding;purine ribonucleotide binding;ribonucleotide binding;transferase activity;transferase activity, transferring ph…	cell part;cytoplasm;intracellular part	Carbon fixation in photosynthetic organisms;Glycolysis / Gluconeogenesis	GO:0005975;GO:0005996;GO:0006006;GO:0006007;GO:0006066;GO:0006091;GO:0006096;GO:0008152;GO:0009056;GO:0009987;GO:0016052;GO:0019318;GO:0019320;GO:0044237;GO:0044238;GO:0044262;GO:0044275;GO:0044281;GO:0044282;GO:0046164;GO:0046365	GO:0000166;GO:0003824;GO:0004618;GO:0005488;GO:0005524;GO:0016301;GO:0016740;GO:0016772;GO:0016774;GO:0017076;GO:0030554;GO:0032553;GO:0032555;GO:0032559;GO:0035639	GO:0005737;GO:0044424;GO:0044464	ko00010;ko00710	323.31	0	40.979	1535866752	1642066560	1642700032	1267066624	3.02326	0.827459	-0.0294228	0.705633	-0.029384	1.67479	0.0837291	2.42244	0.113152	0.000905815	3.87828e-05	2.24247	0.113113	P0C6Q3	>sp|P0C6Q3|PGK_VIBCH Phosphoglycerate kinase OS=Vibrio cholerae serotype O1 (strain ATCC 39315 / El Tor Inaba N16961) GN=pgk PE=3 SV=1
6.57878	6.49153	6.65118	6.72089	6.66222	6.55523	6.66978	6.71631	6.56439	6.80481	6.83138	6.76331	+			+	+		+			cell outer membrane;cell part;external encapsulating structure part;membrane;outer membrane;plasma membrane	Vibrio cholerae infection;Vibrio cholerae pathogenic cycle			GO:0005886;GO:0009279;GO:0016020;GO:0019867;GO:0044462;GO:0044464	ko05110;ko05111	46.949	0	38.211	3.79047e+06	4481400	4.51547e+06	6320200	1.56362	0.467196	-0.0722818	0.52054	-0.0763334	1.96562	-0.226003	1.37035	-0.153722	0.0204168	-0.00405153	1.41888	-0.14967	P0C6Q5	>sp|P0C6Q5|TCPF_VIBCH Toxin coregulated pilus biosynthesis protein F OS=Vibrio cholerae serotype O1 (strain ATCC 39315 / El Tor Inaba N16961) GN=tcpF PE=1 SV=1
8.30199	8.38991	8.3211	8.40548	8.45497	8.50436	8.20298	8.16794	8.17624	8.4652	8.46111	8.41479	+	+	+	+		+	+	biological regulation;cation homeostasis;chemical homeostasis;establishment of localization;homeostatic process;ion homeostasis;ion transport;iron ion homeostasis;multi-organism process;pathogenesis;regulation of biological quality;transport	receptor activity;transporter activity	cell outer membrane;cell part;external encapsulating structure part;integral to membrane;intrinsic to membrane;membrane;membrane part;outer membrane;plasma membrane		GO:0006810;GO:0006811;GO:0009405;GO:0042592;GO:0048878;GO:0050801;GO:0051234;GO:0051704;GO:0055072;GO:0055080;GO:0065007;GO:0065008	GO:0004872;GO:0005215	GO:0005886;GO:0009279;GO:0016020;GO:0016021;GO:0019867;GO:0031224;GO:0044425;GO:0044462;GO:0044464		323.31	0	71.668	218440000	286293344	152280000	280303328	4.17798	1.39878	-0.117272	2.2469	0.155281	1.60549	-0.109369	0.0854166	0.00790342	3.06522	0.272553	3.78416	-0.26465	P0C6R0	>sp|P0C6R0|IRGA_VIBCH Iron-regulated outer membrane virulence protein OS=Vibrio cholerae serotype O1 (strain ATCC 39315 / El Tor Inaba N16961) GN=irgA PE=3 SV=1
8.86336	8.8872	8.82697	8.96178	8.90054	8.90612	8.97459	8.9843	8.9829	9.10968	9.17525	9.04724	+		+	+	+	+	+		binding;cation binding;cation transmembrane transporter activity;inorganic cation transmembrane transporter activity;ion binding;ion transmembrane transporter activity;iron ion binding;iron ion transmembrane transporter activity;metal ion binding;metal ion transmembrane transporter activity;receptor activity;siderophore transmembrane transporter activity;siderophore transporter activity;substrate…	cell outer membrane;cell part;external encapsulating structure part;integral to membrane;intrinsic to membrane;membrane;membrane part;outer membrane;plasma membrane			GO:0004872;GO:0005215;GO:0005381;GO:0005488;GO:0005506;GO:0008324;GO:0015075;GO:0015343;GO:0022857;GO:0022890;GO:0022891;GO:0022892;GO:0042927;GO:0043167;GO:0043169;GO:0046872;GO:0046873;GO:0046914;GO:0046915	GO:0005886;GO:0009279;GO:0016020;GO:0016021;GO:0019867;GO:0031224;GO:0044425;GO:0044462;GO:0044464		323.31	0	76.412	724236672	838889984	956346688	1299766656	3.50913	1.14029	-0.0636349	2.6197	-0.121416	2.45045	-0.251544	1.96379	-0.187909	1.36446	-0.0577815	1.60746	-0.130128	P0C6R1	>sp|P0C6R1|VIUA_VIBCH Vibriobactin receptor OS=Vibrio cholerae serotype O1 (strain ATCC 39315 / El Tor Inaba N16961) GN=viuA PE=3 SV=1
7.01599	7.02898	7.2048	6.97849	7.13666	6.84591	7.41499	7.44663	7.49427	7.4726	7.34807	7.31277	+		+	+	+	+		cell death;cell killing;cellular process;chemotaxis;cytolysis;cytolysis in other organism;death;hemolysis in other organism;killing of cells of other organism;locomotion;multi-organism process;pathogenesis;response to chemical stimulus;response to external stimulus;response to stimulus;taxis	molecular transducer activity;signal transducer activity;transporter activity	cell outer membrane;cell part;external encapsulating structure part;integral to membrane;intrinsic to membrane;membrane;membrane part;outer membrane;plasma membrane		GO:0001906;GO:0006935;GO:0008219;GO:0009405;GO:0009605;GO:0009987;GO:0016265;GO:0019835;GO:0031640;GO:0040011;GO:0042221;GO:0042330;GO:0044179;GO:0050896;GO:0051704;GO:0051715	GO:0004871;GO:0005215;GO:0060089	GO:0005886;GO:0009279;GO:0016020;GO:0016021;GO:0019867;GO:0031224;GO:0044425;GO:0044462;GO:0044464		167.38	0	60.034	12363333	10075933	28391666	24175000	2.90285	0.391213	0.0962367	2.3195	-0.368707	1.71318	-0.294557	1.80247	-0.390794	2.22599	-0.464944	0.621123	0.0741501	P15492	>sp|P15492|HLYB_VIBCH Methyl-accepting chemotaxis protein HlyB OS=Vibrio cholerae serotype O1 (strain ATCC 39315 / El Tor Inaba N16961) GN=hlyB PE=3 SV=2
8.19904	8.3978	8.28679	8.24638	8.2739	8.33147	8.49787	8.52065	8.63132	8.62856	8.67712	8.60038	+		+	+	+	+				cell outer membrane;cell part;external encapsulating structure part;integral to membrane;intrinsic to membrane;membrane;membrane part;outer membrane;plasma membrane				GO:0005886;GO:0009279;GO:0016020;GO:0016021;GO:0019867;GO:0031224;GO:0044425;GO:0044462;GO:0044464		104.38	0	23.316	200536672	192920000	358063328	433033344	3.40816	0.05865	0.0106297	1.64667	-0.255403	2.27964	-0.340812	3.3246	-0.351441	2.27762	-0.266033	0.845303	-0.0854085	P17266	>sp|P17266|OMPW_VIBCH Outer membrane protein W OS=Vibrio cholerae serotype O1 (strain ATCC 39315 / El Tor Inaba N16961) GN=ompW PE=3 SV=2
8.43315	8.49573	8.54172	8.40023	8.40946	8.42736	7.58337	7.63446	7.53872	7.70812	7.64466	7.61499	+		+	+	+	+		cellular macromolecule metabolic process;cellular metabolic process;cellular process;cellular protein metabolic process;macromolecule metabolic process;metabolic process;primary metabolic process;protein folding;protein metabolic process;response to stimulus;response to stress	adenyl nucleotide binding;adenyl ribonucleotide binding;ATP binding;binding;nucleotide binding;purine nucleotide binding;purine ribonucleoside triphosphate binding;purine ribonucleotide binding;ribonucleotide binding	cell part;cytoplasm;intracellular part	Antigen processing and presentation;NOD-like receptor signaling pathway;Pathways in cancer;Plant-pathogen interaction;Progesterone-mediated oocyte maturation;Prostate cancer;Protein processing in endoplasmic reticulum	GO:0006457;GO:0006950;GO:0008152;GO:0009987;GO:0019538;GO:0043170;GO:0044237;GO:0044238;GO:0044260;GO:0044267;GO:0050896	GO:0000166;GO:0005488;GO:0005524;GO:0017076;GO:0030554;GO:0032553;GO:0032555;GO:0032559;GO:0035639	GO:0005737;GO:0044424;GO:0044464	ko04141;ko04612;ko04621;ko04626;ko04914;ko05200;ko05215	323.31	0	72.197	310783328	258520000	38661668	45465332	8.14613	1.12802	0.0778478	4.56554	0.904679	4.43106	0.834272	4.91578	0.756424	5.05864	0.826831	0.838157	-0.0704072	P22359	>sp|P22359|HTPG_VIBCH Chaperone protein HtpG OS=Vibrio cholerae serotype O1 (strain ATCC 39315 / El Tor Inaba N16961) GN=htpG PE=2 SV=2
7.40204	7.44331	7.46867	7.42948	7.47268	7.51276	7.64708	7.64758	7.58548	7.74557	7.66765	7.68547	+		+	+	+	+		cell communication;cellular macromolecule metabolic process;cellular metabolic process;cellular nitrogen compound metabolic process;cellular process;cellular response to external stimulus;cellular response to extracellular stimulus;cellular response to stimulus;cellular response to stress;DNA metabolic process;DNA recombination;DNA repair;macromolecule metabolic process;metabolic process;nitrogen…	adenyl nucleotide binding;adenyl ribonucleotide binding;ATP binding;ATPase activity;ATPase activity, coupled;binding;catalytic activity;damaged DNA binding;DNA binding;DNA-dependent ATPase activity;hydrolase activity;hydrolase activity, acting on acid anhydrides;hydrolase activity, acting on acid anhydrides, in phosphorus-containing anhydrides;nucleic acid binding;nucleoside-triphosphatase activi…	cell part;cytoplasm;intracellular part	Homologous recombination	GO:0006139;GO:0006259;GO:0006281;GO:0006310;GO:0006807;GO:0006950;GO:0006974;GO:0007154;GO:0008152;GO:0009432;GO:0009605;GO:0009987;GO:0009991;GO:0031668;GO:0033554;GO:0034641;GO:0043170;GO:0044237;GO:0044238;GO:0044260;GO:0050896;GO:0051716;GO:0071496;GO:0090304	GO:0000166;GO:0003676;GO:0003677;GO:0003684;GO:0003697;GO:0003824;GO:0005488;GO:0005524;GO:0008094;GO:0016462;GO:0016787;GO:0016817;GO:0016818;GO:0016887;GO:0017076;GO:0017111;GO:0030554;GO:0032553;GO:0032555;GO:0032559;GO:0035639;GO:0042623;GO:0043566	GO:0005737;GO:0044424;GO:0044464	ko03440	217.65	0	38.25	27470666	29714666	42430332	50218000	4.08364	0.471491	-0.0336353	2.57914	-0.188707	2.99119	-0.261556	2.60454	-0.227921	2.09316	-0.155072	1.09383	-0.0728493	P45383	>sp|P45383|RECA_VIBCH Protein RecA OS=Vibrio cholerae serotype O1 (strain ATCC 39315 / El Tor Inaba N16961) GN=recA PE=3 SV=1
6.6646	6.77009	6.83238	6.71554	6.8232	6.76727	6.98102	6.94559	6.92536	7.10013	7.1717	6.971	+		+	+	+	+		cellular process;establishment of localization;establishment of localization in cell;establishment of protein localization;protein secretion;protein secretion by the type II secretion system;protein transmembrane transport;protein transport;secretion;secretion by cell;transmembrane transport;transport	protein transporter activity;substrate-specific transporter activity;transporter activity	cell outer membrane;cell part;external encapsulating structure part;macromolecular complex;membrane;outer membrane;plasma membrane;protein complex;type II protein secretion system complex		GO:0006810;GO:0009306;GO:0009987;GO:0015031;GO:0015628;GO:0032940;GO:0045184;GO:0046903;GO:0051234;GO:0051649;GO:0055085;GO:0071806	GO:0005215;GO:0008565;GO:0022892	GO:0005886;GO:0009279;GO:0015627;GO:0016020;GO:0019867;GO:0032991;GO:0043234;GO:0044462;GO:0044464		86.056	0	73.469	5.76907e+06	5.90057e+06	8938600	12265367	2.79463	0.0788755	-0.0129778	1.71081	-0.194967	1.88212	-0.325253	2.03103	-0.312275	2.18205	-0.181989	1.00304	-0.130286	P45779	>sp|P45779|GSPD_VIBCH Type II secretion system protein D OS=Vibrio cholerae serotype O1 (strain ATCC 39315 / El Tor Inaba N16961) GN=epsD PE=1 SV=2
7.8499	7.84909	7.84466	7.95855	7.95371	7.9343	7.88421	7.78341	7.79918	7.8547	7.79758	7.83925	+	+			+	+		biological regulation;cell redox homeostasis;cellular homeostasis;cellular metabolic process;cellular nitrogen compound metabolic process;cellular process;coenzyme metabolic process;cofactor metabolic process;heterocycle metabolic process;homeostatic process;metabolic process;NADP metabolic process;nicotinamide nucleotide metabolic process;nitrogen compound metabolic process;nucleobase-containing…	binding;catalytic activity;cation transmembrane transporter activity;coenzyme binding;cofactor binding;flavin adenine dinucleotide binding;hydrogen ion transmembrane transporter activity;inorganic cation transmembrane transporter activity;ion transmembrane transporter activity;monovalent inorganic cation transmembrane transporter activity;NAD(P)+ transhydrogenase (B-specific) activity;NAD(P)+ tra…	cell part;cytoplasm;intracellular part	Nicotinate and nicotinamide metabolism	GO:0006139;GO:0006732;GO:0006733;GO:0006739;GO:0006753;GO:0006807;GO:0008152;GO:0009117;GO:0009987;GO:0019362;GO:0019725;GO:0034641;GO:0042592;GO:0044237;GO:0044238;GO:0044281;GO:0045454;GO:0046483;GO:0046496;GO:0050789;GO:0050794;GO:0051186;GO:0055086;GO:0065007;GO:0065008;GO:0072524	GO:0003824;GO:0003957;GO:0005215;GO:0005488;GO:0008324;GO:0008746;GO:0015075;GO:0015077;GO:0015078;GO:0016491;GO:0016651;GO:0016652;GO:0022857;GO:0022890;GO:0022891;GO:0022892;GO:0048037;GO:0050660;GO:0050662	GO:0005737;GO:0044424;GO:0044464	ko00760	146.9	0	50.941	70451000	88916336	66768000	67791336	2.40211	3.73456	-0.100975	0.337527	0.0256149	0.434067	0.0173707	2.50484	0.118345	1.76885	0.126589	0.0817273	-0.0082442	P50529	>sp|P50529|STHA_VIBCH Soluble pyridine nucleotide transhydrogenase OS=Vibrio cholerae serotype O1 (strain ATCC 39315 / El Tor Inaba N16961) GN=sthA PE=3 SV=2
7.66687	7.59459	7.58407	7.65305	7.69318	7.71379	7.80502	7.78762	8.02065	7.72323	7.86468	7.76636	+		+	+					binding;nucleic acid binding;RNA binding;translation factor activity, nucleic acid binding;translation initiation factor activity	cell part;cytoplasm;intracellular part			GO:0003676;GO:0003723;GO:0003743;GO:0005488;GO:0008135	GO:0005737;GO:0044424;GO:0044464		98.563	0	8.2225	41377668	48685668	76674336	61498000	1.71729	1.06502	-0.0714955	1.49347	-0.255921	1.58043	-0.169579	1.01172	-0.098083	1.12585	-0.184425	0.430166	0.0863423	P65128	>sp|P65128|IF1_VIBCH Translation initiation factor IF-1 OS=Vibrio cholerae serotype O1 (strain ATCC 39315 / El Tor Inaba N16961) GN=infA PE=3 SV=1
7.96611	7.87007	7.87914	8.09861	8.01758	8.10782	7.98478	7.89854	7.88414	7.81887	7.811	7.74532	+	+		+	+	+	+	biosynthetic process;cellular biosynthetic process;cellular macromolecule biosynthetic process;cellular macromolecule metabolic process;cellular metabolic process;cellular process;cellular protein metabolic process;macromolecule biosynthetic process;macromolecule metabolic process;metabolic process;primary metabolic process;protein metabolic process;translation	structural constituent of ribosome;structural molecule activity	cell part;cytoplasmic part;intracellular non-membrane-bounded organelle;intracellular organelle;intracellular part;macromolecular complex;non-membrane-bounded organelle;organelle;ribonucleoprotein complex;ribosome	Ribosome	GO:0006412;GO:0008152;GO:0009058;GO:0009059;GO:0009987;GO:0019538;GO:0034645;GO:0043170;GO:0044237;GO:0044238;GO:0044249;GO:0044260;GO:0044267	GO:0003735;GO:0005198	GO:0005840;GO:0030529;GO:0032991;GO:0043226;GO:0043228;GO:0043229;GO:0043232;GO:0044424;GO:0044444;GO:0044464	ko03010	22.069	0	8.4869	80781000	119266664	84103000	62081000	3.05501	1.80776	-0.169564	0.147448	-0.0173856	1.37541	0.113376	2.8058	0.282939	1.63418	0.152178	1.5408	0.130761	P66532	>sp|P66532|RS21_VIBCH 30S ribosomal protein S21 OS=Vibrio cholerae serotype O1 (strain ATCC 39315 / El Tor Inaba N16961) GN=rpsU PE=3 SV=1
7.67534	7.67673	7.68285	7.79603	7.76935	7.83035	7.91593	7.80297	7.77691	7.84685	7.81218	7.80627	+	+	+	+				alcohol biosynthetic process;alcohol metabolic process;biosynthetic process;carbohydrate biosynthetic process;carbohydrate metabolic process;cellular biosynthetic process;cellular carbohydrate biosynthetic process;cellular carbohydrate metabolic process;cellular macromolecule biosynthetic process;cellular macromolecule metabolic process;cellular metabolic process;cellular nitrogen compound metabo…	binding;catalytic activity;cation binding;intramolecular transferase activity;intramolecular transferase activity, phosphotransferases;ion binding;isomerase activity;magnesium ion binding;metal ion binding;phosphomannomutase activity	cell part;membrane;plasma membrane	Amino sugar and nucleotide sugar metabolism;Fructose and mannose metabolism	GO:0000271;GO:0005975;GO:0005976;GO:0005996;GO:0006013;GO:0006066;GO:0006139;GO:0006807;GO:0008152;GO:0009058;GO:0009059;GO:0009225;GO:0009226;GO:0009243;GO:0009298;GO:0009987;GO:0016051;GO:0019307;GO:0019318;GO:0019319;GO:0019673;GO:0033692;GO:0034637;GO:0034641;GO:0034645;GO:0043170;GO:0044237;GO:0044238;GO:0044249;GO:0044260;GO:0044262;GO:0044264;GO:0044281;GO:0044283;GO:0046165;GO:0046364;GO:…	GO:0000287;GO:0003824;GO:0004615;GO:0005488;GO:0016853;GO:0016866;GO:0016868;GO:0043167;GO:0043169;GO:0046872	GO:0005886;GO:0016020;GO:0044464	ko00051;ko00520	196.18	0	51.838	47678000	62993668	68586336	66395332	2.18216	2.60115	-0.120272	1.64117	-0.153633	3.43387	-0.14346	0.460992	-0.0231881	0.292459	-0.0333614	0.0807156	0.0101733	Q06951	>sp|Q06951|RFBB_VIBCH Phosphomannomutase OS=Vibrio cholerae serotype O1 (strain ATCC 39315 / El Tor Inaba N16961) GN=rfbB PE=3 SV=1
8.54138	8.4577	8.55697	8.64518	8.62513	8.60811	8.50545	8.45468	8.43481	8.42697	8.39898	8.46664	+	+			+	+		alcohol metabolic process;biosynthetic process;carbohydrate biosynthetic process;carbohydrate metabolic process;cellular biosynthetic process;cellular carbohydrate biosynthetic process;cellular carbohydrate metabolic process;cellular lipid metabolic process;cellular macromolecule biosynthetic process;cellular macromolecule metabolic process;cellular metabolic process;cellular nitrogen compound me…	binding;carbon-oxygen lyase activity;catalytic activity;coenzyme binding;cofactor binding;GDP-mannose 4,6-dehydratase activity;hydro-lyase activity;lyase activity	cell part;intracellular	Amino sugar and nucleotide sugar metabolism;Fructose and mannose metabolism	GO:0000271;GO:0005975;GO:0005976;GO:0005996;GO:0006013;GO:0006066;GO:0006139;GO:0006629;GO:0006807;GO:0008152;GO:0008610;GO:0008653;GO:0009058;GO:0009059;GO:0009103;GO:0009225;GO:0009987;GO:0016051;GO:0019318;GO:0019673;GO:0033692;GO:0034637;GO:0034641;GO:0034645;GO:0043170;GO:0044237;GO:0044238;GO:0044249;GO:0044255;GO:0044260;GO:0044262;GO:0044264;GO:0044281	GO:0003824;GO:0005488;GO:0008446;GO:0016829;GO:0016835;GO:0016836;GO:0048037;GO:0050662	GO:0005622;GO:0044464	ko00051;ko00520	219.56	0	42.052	331756672	423060000	292420000	270243328	2.95957	1.52107	-0.107455	0.650762	0.0537039	1.13021	0.0878178	3.02336	0.195273	2.61866	0.161159	0.520942	0.0341139	Q06952	>sp|Q06952|GM4D_VIBCH GDP-mannose 4,6-dehydratase OS=Vibrio cholerae serotype O1 (strain ATCC 39315 / El Tor Inaba N16961) GN=gmd PE=3 SV=1
8.32521	8.26064	8.30096	8.3362	8.39796	8.41727	8.36764	8.37823	8.40078	8.24035	8.30218	8.27332	+	+	+		+		+	biosynthetic process;carbohydrate biosynthetic process;carbohydrate metabolic process;lipopolysaccharide core region biosynthetic process;lipopolysaccharide core region metabolic process;metabolic process;oligosaccharide biosynthetic process;oligosaccharide metabolic process;primary metabolic process	ADP-glyceromanno-heptose 6-epimerase activity;binding;catalytic activity;coenzyme binding;cofactor binding;isomerase activity;NADP binding;nucleotide binding;racemase and epimerase activity;racemase and epimerase activity, acting on carbohydrates and derivatives		Lipopolysaccharide biosynthesis	GO:0005975;GO:0008152;GO:0009058;GO:0009244;GO:0009311;GO:0009312;GO:0016051;GO:0044238;GO:0046401	GO:0000166;GO:0003824;GO:0005488;GO:0008712;GO:0016853;GO:0016854;GO:0016857;GO:0048037;GO:0050661;GO:0050662		ko00540	323.31	0	35.244	197886672	242753328	241233328	187363328	2.3397	1.33713	-0.0882044	1.82199	-0.0866108	0.383375	0.0236543	1.67902	0.111859	0.0201594	0.00159359	2.24923	0.110265	Q06963	>sp|Q06963|HLDD_VIBCH ADP-L-glycero-D-manno-heptose-6-epimerase OS=Vibrio cholerae serotype O1 (strain ATCC 39315 / El Tor Inaba N16961) GN=hldD PE=3 SV=1
8.64417	8.57664	8.55564	8.51768	8.63092	8.55657	8.37785	8.34042	8.26621	8.3356	8.35601	8.37785	+		+	+	+	+		alcohol metabolic process;benzene-containing compound metabolic process;biosynthetic process;catechol-containing compound metabolic process;cellular aromatic compound metabolic process;cellular biosynthetic process;cellular metabolic process;cellular process;cofactor biosynthetic process;cofactor metabolic process;diol metabolic process;metabolic process;nonribosomal peptide biosynthetic process;…	2,3-dihydro-2,3-dihydroxybenzoate dehydrogenase activity;catalytic activity;oxidoreductase activity;oxidoreductase activity, acting on the CH-CH group of donors;oxidoreductase activity, acting on the CH-CH group of donors, NAD or NADP as acceptor		Biosynthesis of siderophore group nonribosomal peptides	GO:0006066;GO:0006518;GO:0006725;GO:0008152;GO:0009058;GO:0009237;GO:0009712;GO:0009987;GO:0018958;GO:0019184;GO:0019290;GO:0019536;GO:0019537;GO:0019540;GO:0034311;GO:0042537;GO:0043043;GO:0044237;GO:0044249;GO:0044281;GO:0051186;GO:0051188	GO:0003824;GO:0008667;GO:0016491;GO:0016627;GO:0016628		ko01053	148.36	0	28.093	392480000	372356672	214093328	227420000	3.69755	0.216867	0.0237614	2.47358	0.263989	2.8835	0.235665	2.40775	0.211904	2.16969	0.240228	0.333689	-0.0283241	Q56632	>sp|Q56632|VIBA_VIBCH Vibriobactin-specific 2,3-dihydro-2,3-dihydroxybenzoate dehydrogenase OS=Vibrio cholerae serotype O1 (strain ATCC 39315 / El Tor Inaba N16961) GN=vibA PE=3 SV=1
8.11358	8.13716	8.20298	8.19457	8.1274	8.21711	8.34036	8.35292	8.26748	8.40204	8.36821	8.31355	+		+	+	+	+		alanyl-tRNA aminoacylation;amine metabolic process;amino acid activation;carboxylic acid metabolic process;cellular amine metabolic process;cellular amino acid metabolic process;cellular ketone metabolic process;cellular macromolecule metabolic process;cellular metabolic process;cellular nitrogen compound metabolic process;cellular process;macromolecule metabolic process;metabolic process;ncRNA m…	adenyl nucleotide binding;adenyl ribonucleotide binding;alanine-tRNA ligase activity;aminoacyl-tRNA ligase activity;ATP binding;binding;catalytic activity;cation binding;ion binding;ligase activity;ligase activity, forming aminoacyl-tRNA and related compounds;ligase activity, forming carbon-oxygen bonds;metal ion binding;nucleic acid binding;nucleotide binding;purine nucleotide binding;purine rib…	cell part;cytoplasm;intracellular part	Aminoacyl-tRNA biosynthesis	GO:0006082;GO:0006139;GO:0006399;GO:0006418;GO:0006419;GO:0006520;GO:0006807;GO:0008152;GO:0009308;GO:0009987;GO:0016070;GO:0019752;GO:0034641;GO:0034660;GO:0042180;GO:0043038;GO:0043039;GO:0043170;GO:0043436;GO:0044106;GO:0044237;GO:0044238;GO:0044260;GO:0044281;GO:0090304	GO:0000049;GO:0000166;GO:0003676;GO:0003723;GO:0003824;GO:0004812;GO:0004813;GO:0005488;GO:0005524;GO:0008270;GO:0016874;GO:0016875;GO:0016876;GO:0017076;GO:0030554;GO:0032553;GO:0032555;GO:0032559;GO:0035639;GO:0043167;GO:0043169;GO:0046872;GO:0046914	GO:0005737;GO:0044424;GO:0044464	ko00970	323.31	0	93.826	142203328	151823328	209823328	230560000	2.93517	0.305145	-0.0284545	1.95808	-0.169013	2.31667	-0.210028	2.08484	-0.181573	1.68491	-0.140559	0.480726	-0.0410147	Q56648	>sp|Q56648|SYA_VIBCH Alanine--tRNA ligase OS=Vibrio cholerae serotype O1 (strain ATCC 39315 / El Tor Inaba N16961) GN=alaS PE=3 SV=2
7.92971	7.98883	7.95747	7.73049	7.72289	7.7351	7.93175	7.90935	7.89561	7.84448	7.8812	7.92348	+	+			+	+		establishment of localization;ion transport;transport	alpha-glucoside transmembrane transporter activity;carbohydrate transmembrane transporter activity;channel activity;dextrin transmembrane transporter activity;disaccharide transmembrane transporter activity;glucoside transmembrane transporter activity;maltodextrin transmembrane transporter activity;maltose transmembrane transporter activity;maltose transporting porin activity;passive transmembran…	cell outer membrane;cell part;external encapsulating structure part;macromolecular complex;membrane;membrane part;outer membrane;plasma membrane;pore complex;protein complex		GO:0006810;GO:0006811;GO:0051234	GO:0005215;GO:0005363;GO:0015144;GO:0015151;GO:0015154;GO:0015159;GO:0015267;GO:0015288;GO:0015481;GO:0022803;GO:0022829;GO:0022857;GO:0022891;GO:0022892;GO:0042947;GO:0042957;GO:0042958;GO:0051119	GO:0005886;GO:0009279;GO:0016020;GO:0019867;GO:0032991;GO:0043234;GO:0044425;GO:0044462;GO:0044464;GO:0046930		323.31	0	44.536	91063336	53644000	81751000	76604336	4.51926	3.71253	0.229179	1.08806	0.0464346	1.24552	0.0756192	2.57536	-0.15356	4.09577	-0.182745	0.508356	0.0291847	Q56652	>sp|Q56652|LAMB_VIBCH Maltoporin OS=Vibrio cholerae serotype O1 (strain ATCC 39315 / El Tor Inaba N16961) GN=lamB PE=2 SV=1
8.26321	8.2752	8.27026	8.32298	8.34278	8.33224	8.2724	8.25402	8.23439	8.52031	8.5195	8.45986	+	+		+	+	+	+	cellular process;establishment of localization;establishment of localization in cell;establishment of protein localization;protein secretion;protein transport;secretion;secretion by cell;transport	transporter activity	cell outer membrane;cell part;external encapsulating structure part;integral to membrane;intrinsic to membrane;membrane;membrane part;outer membrane;plasma membrane	Bacterial secretion system	GO:0006810;GO:0009306;GO:0009987;GO:0015031;GO:0032940;GO:0045184;GO:0046903;GO:0051234;GO:0051649	GO:0005215	GO:0005886;GO:0009279;GO:0016020;GO:0016021;GO:0019867;GO:0031224;GO:0044425;GO:0044462;GO:0044464	ko03070	323.31	0	47.751	186030000	215150000	179423328	316810016	5.77085	3.15171	-0.0631107	0.623322	0.0159537	3.46207	-0.230336	2.88491	-0.167225	2.51145	0.0790644	3.37825	-0.246289	Q9K2Y1	>sp|Q9K2Y1|TOLC_VIBCH Outer membrane protein TolC OS=Vibrio cholerae serotype O1 (strain ATCC 39315 / El Tor Inaba N16961) GN=tolC PE=1 SV=1
7.56898	7.56483	7.58077	7.65296	7.61787	7.59255	7.24252	7.14934	7.21091	7.12678	7.12714	7.19645	+		+	+	+	+			catalytic activity;dioxygenase activity;oxidoreductase activity;oxidoreductase activity, acting on single donors with incorporation of molecular oxygen;oxidoreductase activity, acting on single donors with incorporation of molecular oxygen, incorporation of two atoms of oxygen				GO:0003824;GO:0016491;GO:0016701;GO:0016702;GO:0051213			57.087	0	14.547	37288668	41863668	15945000	14170333	6.62386	1.28148	-0.0496044	3.73928	0.370602	4.23427	0.421401	4.07286	0.471005	3.6862	0.420207	0.639381	0.0507986	Q9K3D3	>tr|Q9K3D3|Q9K3D3_VIBCH Biphenyl-2,3-diol 1,2-dioxygenase III-related protein OS=Vibrio cholerae serotype O1 (strain ATCC 39315 / El Tor Inaba N16961) GN=VC_A0328 PE=1 SV=1
8.02445	8.08696	8.05492	8.17742	8.15564	8.14919	7.59764	7.58564	7.52222	7.52027	7.53028	7.55918	+	+	+	+	+	+		amine transport;establishment of localization;nitrogen compound transport;organic substance transport;polyamine transport;putrescine transport;spermidine transport;transport	active transmembrane transporter activity;amine binding;amine transmembrane transporter activity;ATPase activity;ATPase activity, coupled;ATPase activity, coupled to movement of substances;ATPase activity, coupled to transmembrane movement of substances;binding;catalytic activity;hydrolase activity;hydrolase activity, acting on acid anhydrides;hydrolase activity, acting on acid anhydrides, cataly…	cell part;periplasmic space		GO:0006810;GO:0015837;GO:0015846;GO:0015847;GO:0015848;GO:0051234;GO:0071702;GO:0071705	GO:0003824;GO:0005215;GO:0005275;GO:0005488;GO:0015203;GO:0015399;GO:0015405;GO:0015417;GO:0016462;GO:0016787;GO:0016817;GO:0016818;GO:0016820;GO:0016887;GO:0017111;GO:0019808;GO:0022804;GO:0022857;GO:0022891;GO:0022892;GO:0042623;GO:0042626;GO:0043176;GO:0043492	GO:0042597;GO:0044464		257.32	0	38.757	113813336	144850000	37131332	34426332	8.2722	2.20782	-0.105307	4.10008	0.486941	4.75806	0.518867	5.76439	0.624174	4.73165	0.592248	0.539001	0.031926	Q9KKJ4	>tr|Q9KKJ4|Q9KKJ4_VIBCH Putrescine-binding periplasmic protein OS=Vibrio cholerae serotype O1 (strain ATCC 39315 / El Tor Inaba N16961) GN=VC_A1113 PE=3 SV=1
8.00617	8.04575	8.02457	8.04642	7.97307	7.98236	7.87297	7.92033	7.7984	7.9004	7.91512	7.90295	+		+	+	+	+										323.31	0	67.126	106120000	100429000	73581336	80575664	2.6133	0.410668	0.0248803	1.90966	0.161594	3.1988	0.11934	1.79943	0.0944594	1.49533	0.136714	0.518522	-0.0422544	Q9KKM6	>tr|Q9KKM6|Q9KKM6_VIBCH Uncharacterized protein OS=Vibrio cholerae serotype O1 (strain ATCC 39315 / El Tor Inaba N16961) GN=VC_A1077 PE=4 SV=1
8.40497	8.46147	8.40988	8.35959	8.36721	8.4118	8.41337	8.47851	8.46513	8.37574	8.30782	8.38826	+					+	+									323.31	0	43.052	266810000	239966672	283943328	228393328	1.43004	0.878849	0.045907	0.428028	-0.0268949	1.03822	0.068169	0.303697	0.0222619	1.32664	-0.0728019	1.3891	0.0950638	Q9KKM8	>tr|Q9KKM8|Q9KKM8_VIBCH Uncharacterized protein OS=Vibrio cholerae serotype O1 (strain ATCC 39315 / El Tor Inaba N16961) GN=VC_A1075 PE=4 SV=1
7.64319	7.58629	7.70901	7.57072	7.56463	7.65443	7.77616	7.86565	7.88246	7.91944	7.83913	7.87914	+		+	+	+	+			catalytic activity;oxidoreductase activity				GO:0003824;GO:0016491			121.09	0	25.019	44572000	39679332	69802000	75941000	3.43286	0.468694	0.0495707	1.80379	-0.19526	2.27399	-0.233077	2.7974	-0.282648	2.29501	-0.24483	0.3964	-0.0378172	Q9KKN0	>tr|Q9KKN0|Q9KKN0_VIBCH Uncharacterized protein OS=Vibrio cholerae serotype O1 (strain ATCC 39315 / El Tor Inaba N16961) GN=VC_A1072 PE=4 SV=1
6.84048	6.82358	6.90924	6.70204	6.64699	6.87493	6.88303	6.98163	6.88848	7.4313	7.37407	7.28634	+			+	+		+		active transmembrane transporter activity;alkali metal ion binding;amine transmembrane transporter activity;amino acid transmembrane transporter activity;binding;carboxylic acid transmembrane transporter activity;cation binding;cation transmembrane transporter activity;cation:amino acid symporter activity;inorganic cation transmembrane transporter activity;ion binding;ion transmembrane transporte…	cell part;integral to membrane;intrinsic to membrane;membrane part			GO:0005215;GO:0005275;GO:0005283;GO:0005298;GO:0005342;GO:0005343;GO:0005416;GO:0005488;GO:0008324;GO:0015075;GO:0015077;GO:0015081;GO:0015171;GO:0015175;GO:0015179;GO:0015193;GO:0015291;GO:0015293;GO:0015294;GO:0015370;GO:0022804;GO:0022857;GO:0022890;GO:0022891;GO:0022892;GO:0031402;GO:0031420;GO:0043167;GO:0043169;GO:0046872;GO:0046873;GO:0046943	GO:0016021;GO:0031224;GO:0044425;GO:0044464		35.309	0	53.228	7233900	5656400	8.32003e+06	23331334	4.27633	0.725212	0.116446	0.656124	-0.0599469	3.28334	-0.506137	2.82087	-0.622584	1.0948	-0.176393	2.9651	-0.44619	Q9KKN1	>tr|Q9KKN1|Q9KKN1_VIBCH Sodium/proline symporter OS=Vibrio cholerae serotype O1 (strain ATCC 39315 / El Tor Inaba N16961) GN=VC_A1071 PE=3 SV=1
7.68455	7.68675	7.80321	7.62005	7.79251	7.81167	7.2929	7.49339	7.47789	7.38322	7.2284	7.28452	+		+	+	+	+										170.88	0	22.352	53514332	56174332	26942334	20113666	3.11436	0.0807928	-0.0165755	1.80139	0.303444	2.6864	0.426121	2.36601	0.442696	1.64658	0.32002	0.711966	0.122677	Q9KKP8	>tr|Q9KKP8|Q9KKP8_VIBCH Uncharacterized protein OS=Vibrio cholerae serotype O1 (strain ATCC 39315 / El Tor Inaba N16961) GN=VC_A1054 PE=4 SV=1
6.73027	6.70108	6.57576	6.53646	6.46506	6.61294	6.7039	6.83707	6.72361	6.84861	6.71752	6.94066	+				+	+										16.863	0	34.923	4721000	3.48617e+06	5.74027e+06	6.99927e+06	1.80874	0.96073	0.130886	0.61133	-0.0858232	0.972589	-0.166557	1.73202	-0.297443	1.65813	-0.216709	0.452199	-0.0807335	Q9KKQ2	>tr|Q9KKQ2|Q9KKQ2_VIBCH Uncharacterized protein OS=Vibrio cholerae serotype O1 (strain ATCC 39315 / El Tor Inaba N16961) GN=VC_A1050 PE=4 SV=1
7.2164	7.15531	7.08052	7.06752	7.10034	6.97305	7.39752	7.36192	7.18101	7.38673	7.46608	7.4909	+			+	+	+			catalytic activity;oxidoreductase activity				GO:0003824;GO:0016491			70.639	0	35.221	14265000	11226433	21052334	28192334	2.89807	0.882637	0.103775	0.981766	-0.162742	2.38604	-0.297161	2.90121	-0.400936	1.58633	-0.266517	0.842956	-0.134419	Q9KKQ4	>tr|Q9KKQ4|Q9KKQ4_VIBCH Oxidoreductase, Gfo/Idh/MocA family OS=Vibrio cholerae serotype O1 (strain ATCC 39315 / El Tor Inaba N16961) GN=VC_A1048 PE=1 SV=1
8.72008	8.74941	8.74761	8.71946	8.68452	8.71523	8.70443	8.67795	8.73086	8.66685	8.66568	8.69522	+			+				carbohydrate metabolic process;metabolic process;primary metabolic process	binding;catalytic activity;cation binding;intramolecular transferase activity;intramolecular transferase activity, phosphotransferases;ion binding;isomerase activity;magnesium ion binding;metal ion binding;phosphomannomutase activity		Amino sugar and nucleotide sugar metabolism;Fructose and mannose metabolism	GO:0005975;GO:0008152;GO:0044238	GO:0000287;GO:0003824;GO:0004615;GO:0005488;GO:0016853;GO:0016866;GO:0016868;GO:0043167;GO:0043169;GO:0046872		ko00051;ko00520	323.31	0	62.054	548583360	508956672	506936640	474386656	1.50474	1.05496	0.0326325	0.897923	0.0346203	2.0188	0.0631205	0.975544	0.030488	0.035741	0.00198778	0.721496	0.0285002	Q9KKR1	>tr|Q9KKR1|Q9KKR1_VIBCH Phosphomannomutase, putative OS=Vibrio cholerae serotype O1 (strain ATCC 39315 / El Tor Inaba N16961) GN=VC_A1041 PE=3 SV=1
6.9341	6.85206	6.89705	6.82861	6.93864	6.88721	7.31084	7.35635	7.36135	7.188	7.30146	7.29916	+		+	+	+	+										59.294	0	12.114	7.86493e+06	7.71143e+06	22051334	18450334	5.39842	0.0857169	0.00958633	4.01201	-0.448443	2.94171	-0.36847	2.81456	-0.378056	3.67615	-0.458029	0.916612	0.0799735	Q9KKR6	>tr|Q9KKR6|Q9KKR6_VIBCH Uncharacterized protein OS=Vibrio cholerae serotype O1 (strain ATCC 39315 / El Tor Inaba N16961) GN=VC_A1035 PE=4 SV=1
7.04305	7.0125	7.02764	7.14258	7.1358	7.02849	6.83693	6.91408	6.8258	6.84125	6.94752	6.75562	+		+	+	+	+		establishment of localization;transport	transporter activity			GO:0006810;GO:0051234	GO:0005215			50.895	0	50.741	10663667	12745000	7256800	7.16557e+06	2.602	0.916578	-0.0745616	2.35585	0.16879	1.48105	0.179596	1.72328	0.254158	2.20546	0.243352	0.0603735	0.0108062	Q9KKR8	>tr|Q9KKR8|Q9KKR8_VIBCH Extracellular solute-binding protein, putative OS=Vibrio cholerae serotype O1 (strain ATCC 39315 / El Tor Inaba N16961) GN=VC_A1033 PE=4 SV=1
7.76745	7.76297	7.70794	7.75939	7.75733	7.75462	7.63439	7.65606	7.592	7.5826	7.52536	7.5223	+		+	+	+	+	+	carbohydrate catabolic process;carbohydrate metabolic process;catabolic process;cellular carbohydrate catabolic process;cellular carbohydrate metabolic process;cellular glucan metabolic process;cellular macromolecule metabolic process;cellular metabolic process;cellular polysaccharide catabolic process;cellular polysaccharide metabolic process;cellular process;energy derivation by oxidation of or…	binding;catalytic activity;cation binding;glycogen debranching enzyme activity;hydrolase activity;hydrolase activity, acting on glycosyl bonds;hydrolase activity, hydrolyzing O-glycosyl compounds;ion binding			GO:0000272;GO:0005975;GO:0005976;GO:0005977;GO:0005980;GO:0006073;GO:0006091;GO:0006112;GO:0008152;GO:0009056;GO:0009057;GO:0009251;GO:0009987;GO:0015980;GO:0016052;GO:0043170;GO:0044042;GO:0044237;GO:0044238;GO:0044247;GO:0044260;GO:0044262;GO:0044264;GO:0044275;GO:0055114	GO:0003824;GO:0004133;GO:0004553;GO:0005488;GO:0016787;GO:0016798;GO:0043167;GO:0043169			225.38	0	74.922	55841000	57163000	42490332	35020000	4.33687	0.223704	-0.0109878	1.93943	0.118641	2.74962	0.202705	3.39095	0.213693	2.62917	0.129629	1.43831	0.0840638	Q9KKS1	>tr|Q9KKS1|Q9KKS1_VIBCH Glycogen operon protein GlgX OS=Vibrio cholerae serotype O1 (strain ATCC 39315 / El Tor Inaba N16961) GN=VC_A1029 PE=3 SV=1
7.52807	7.56353	7.50158	7.59289	7.56834	7.51328	7.60267	7.69426	7.58832	7.7254	7.75115	7.76133	+			+	+		+	carbohydrate transport;establishment of localization;organic substance transport;transport		cell part;periplasmic space		GO:0006810;GO:0008643;GO:0051234;GO:0071702		GO:0042597;GO:0044464		143.31	0	30.616	34025332	36260332	42757000	55747000	3.15612	0.385671	-0.0271125	1.21267	-0.097357	3.29792	-0.214901	2.71959	-0.187788	0.797776	-0.0702445	1.55278	-0.117544	Q9KKS3	>tr|Q9KKS3|Q9KKS3_VIBCH Maltose operon periplasmic protein, putative OS=Vibrio cholerae serotype O1 (strain ATCC 39315 / El Tor Inaba N16961) GN=VC_A1027 PE=4 SV=1
7.89746	7.77714	7.77988	7.61947	7.7143	7.6752	7.80166	7.81324	7.80741	7.76134	7.67323	7.76401	+	+				+		alcohol catabolic process;alcohol metabolic process;amino sugar catabolic process;amino sugar metabolic process;carbohydrate catabolic process;carbohydrate metabolic process;carboxylic acid metabolic process;catabolic process;cellular carbohydrate catabolic process;cellular carbohydrate metabolic process;cellular ketone metabolic process;cellular metabolic process;cellular process;glucosamine met…	catalytic activity;deaminase activity;glucosamine-6-phosphate deaminase activity;hydrolase activity;intramolecular oxidoreductase activity;intramolecular oxidoreductase activity, interconverting aldoses and ketoses;isomerase activity		Amino sugar and nucleotide sugar metabolism	GO:0005975;GO:0005996;GO:0006040;GO:0006041;GO:0006044;GO:0006054;GO:0006066;GO:0006082;GO:0008152;GO:0009056;GO:0009987;GO:0016052;GO:0019262;GO:0019752;GO:0042180;GO:0043436;GO:0044237;GO:0044238;GO:0044262;GO:0044275;GO:0044281;GO:0044282;GO:0046164;GO:0046348;GO:0046365	GO:0003824;GO:0004342;GO:0016787;GO:0016853;GO:0016860;GO:0016861;GO:0019239		ko00520	90.888	0	29.547	66356000	46923332	64189000	54307668	1.71465	1.43112	0.148499	0.0964003	0.0107222	0.793846	0.0852949	0.711449	-0.063204	2.11641	-0.137777	1.16839	0.0745727	Q9KKS5	>sp|Q9KKS5|NAGB_VIBCH Glucosamine-6-phosphate deaminase OS=Vibrio cholerae serotype O1 (strain ATCC 39315 / El Tor Inaba N16961) GN=nagB PE=1 SV=1
7.76165	7.99205	7.95916	7.99234	7.92305	7.97208	7.41194	7.41835	7.51195	7.46358	7.50868	7.44289	+		+	+	+	+										171.1	0	13.746	82324000	91929336	28175666	29688666	4.55427	0.318679	-0.058207	2.35503	0.45687	2.35833	0.432569	4.18843	0.490776	3.7519	0.515077	0.256196	-0.0243014	Q9KKS9	>tr|Q9KKS9|Q9KKS9_VIBCH Uncharacterized protein OS=Vibrio cholerae serotype O1 (strain ATCC 39315 / El Tor Inaba N16961) GN=VC_A1021 PE=4 SV=1
7.69779	7.7606	7.74263	7.61116	7.68274	7.67583	7.68683	7.69008	7.69084	7.63764	7.58346	7.64278	+			+			+		catalytic activity				GO:0003824			92.962	0	22.832	54258668	45473000	48894000	41890000	1.97605	1.22879	0.0770958	1.116	0.0444218	1.87064	0.112381	0.522912	0.0352847	0.64663	-0.032674	1.63278	0.0679587	Q9KKU6	>tr|Q9KKU6|Q9KKU6_VIBCH Uncharacterized protein OS=Vibrio cholerae serotype O1 (strain ATCC 39315 / El Tor Inaba N16961) GN=VC_A1004 PE=4 SV=1
8.09555	8.05265	8.10992	8.14727	8.1878	8.19857	7.36122	7.39623	7.45388	7.29883	7.35131	7.34842	+	+	+	+	+	+			binding;catalytic activity;coenzyme binding;cofactor binding;FMN binding;nucleotide binding;oxidoreductase activity				GO:0000166;GO:0003824;GO:0005488;GO:0010181;GO:0016491;GO:0048037;GO:0050662			208.37	0	38.302	122100000	150813328	25437334	21553334	8.7258	1.77538	-0.0918427	4.542	0.682263	5.19672	0.753186	5.47639	0.845028	4.80487	0.774105	1.04319	0.070923	Q9KKV2	>tr|Q9KKV2|Q9KKV2_VIBCH NADH-dependent flavin oxidoreductase, Oye family OS=Vibrio cholerae serotype O1 (strain ATCC 39315 / El Tor Inaba N16961) GN=VC_A0998 PE=4 SV=1
8.99473	8.92343	8.9285	8.94456	8.92769	8.97117	8.55273	8.55393	8.59721	8.55096	8.56177	8.52865	+		+	+	+	+		alcohol biosynthetic process;alcohol metabolic process;biosynthetic process;carbohydrate biosynthetic process;carbohydrate metabolic process;carboxylic acid metabolic process;cellular biosynthetic process;cellular carbohydrate biosynthetic process;cellular carbohydrate metabolic process;cellular ketone metabolic process;cellular metabolic process;cellular process;gluconeogenesis;glucose metabolic…	adenyl nucleotide binding;adenyl ribonucleotide binding;ATP binding;binding;catalytic activity;cation binding;ion binding;kinase activity;metal ion binding;nucleotide binding;phosphotransferase activity, paired acceptors;purine nucleotide binding;purine ribonucleoside triphosphate binding;purine ribonucleotide binding;pyruvate, water dikinase activity;ribonucleotide binding;transferase activity;t…		Carbon fixation pathways in prokaryotes;Methane metabolism;Pyruvate metabolism	GO:0005975;GO:0005996;GO:0006006;GO:0006066;GO:0006082;GO:0006090;GO:0006094;GO:0008152;GO:0009058;GO:0009987;GO:0016051;GO:0019318;GO:0019319;GO:0019752;GO:0032787;GO:0034637;GO:0042180;GO:0043436;GO:0044237;GO:0044238;GO:0044249;GO:0044262;GO:0044281;GO:0044283;GO:0046165;GO:0046364	GO:0000166;GO:0003824;GO:0005488;GO:0005524;GO:0008986;GO:0016301;GO:0016740;GO:0016772;GO:0016781;GO:0017076;GO:0030554;GO:0032553;GO:0032555;GO:0032559;GO:0035639;GO:0043167;GO:0043169;GO:0046872		ko00620;ko00680;ko00720	323.31	0	88.486	891499968	887520000	370216672	352650016	7.17318	0.0136078	0.00107892	3.8196	0.380929	4.06043	0.401761	4.82357	0.400682	4.40139	0.37985	0.520404	0.0208317	Q9KKW3	>tr|Q9KKW3|Q9KKW3_VIBCH Phosphoenolpyruvate synthase OS=Vibrio cholerae serotype O1 (strain ATCC 39315 / El Tor Inaba N16961) GN=VC_A0987 PE=3 SV=1
7.54393	7.57043	7.70432	7.68269	7.56369	7.73102	7.5185	7.5789	7.6306	8.04634	7.93231	7.87265	+			+	+		+	establishment of localization;peptide transport;transport	active transmembrane transporter activity;adenyl nucleotide binding;adenyl ribonucleotide binding;ATP binding;ATPase activity;ATPase activity, coupled;ATPase activity, coupled to movement of substances;ATPase activity, coupled to transmembrane movement of substances;binding;catalytic activity;hydrolase activity;hydrolase activity, acting on acid anhydrides;hydrolase activity, acting on acid anhyd…			GO:0006810;GO:0015833;GO:0051234	GO:0000166;GO:0003824;GO:0005215;GO:0005488;GO:0005524;GO:0015399;GO:0015405;GO:0016462;GO:0016787;GO:0016817;GO:0016818;GO:0016820;GO:0016887;GO:0017076;GO:0017111;GO:0022804;GO:0022857;GO:0030554;GO:0032553;GO:0032555;GO:0032559;GO:0035639;GO:0042623;GO:0042626;GO:0043492			96.201	0	60.143	40933000	46203000	37879668	90470664	2.7971	0.3069	-0.0529114	0.195889	0.0302251	2.07532	-0.344206	1.82525	-0.291294	0.631113	0.0831366	2.46361	-0.374431	Q9KKX3	>tr|Q9KKX3|Q9KKX3_VIBCH ABC transporter, ATP-binding protein OS=Vibrio cholerae serotype O1 (strain ATCC 39315 / El Tor Inaba N16961) GN=VC_A0977 PE=3 SV=1
6.79841	6.80932	6.75491	6.7996	6.80701	6.87397	6.58635	6.56981	6.71095	6.52482	6.71927	NaN	+		+			+			binding;catalytic activity;cation binding;dioxygenase activity;ion binding;metal ion binding;oxidoreductase activity;oxidoreductase activity, acting on single donors with incorporation of molecular oxygen;oxidoreductase activity, acting on single donors with incorporation of molecular oxygen, incorporation of two atoms of oxygen;quercetin 2,3-dioxygenase activity				GO:0003824;GO:0005488;GO:0008127;GO:0016491;GO:0016701;GO:0016702;GO:0043167;GO:0043169;GO:0046872;GO:0051213			48.355	0	31.324	6.14013e+06	6732400	4.23713e+06	2.86253e+06	1.6609	0.610024	-0.0393114	1.5937	0.165181	0.934528	0.1655	1.09657	0.204812	1.81196	0.204492	0.00110362	0.000319401	Q9KKY1	>sp|Q9KKY1|Y3769_VIBCH Putative quercetin 2,3-dioxygenase VC_A0969 OS=Vibrio cholerae serotype O1 (strain ATCC 39315 / El Tor Inaba N16961) GN=VC_A0969 PE=3 SV=1
7.14308	7.22603	7.18201	7.35034	7.37036	7.34286	7.3138	7.32236	7.31838	7.37858	7.43486	7.41298	+	+	+	+	+	+	+									230.64	0	45.656	15312000	22629666	20806334	25669666	4.44371	2.59854	-0.170814	2.29672	-0.134473	2.8269	-0.225097	1.38255	-0.0542833	1.87659	0.0363409	2.2651	-0.0906242	Q9KKY8	>tr|Q9KKY8|Q9KKY8_VIBCH Uncharacterized protein OS=Vibrio cholerae serotype O1 (strain ATCC 39315 / El Tor Inaba N16961) GN=VC_A0962 PE=4 SV=1
7.47669	7.46005	7.39945	7.55927	7.50823	7.30166	6.99901	6.97454	7.05808	6.97123	6.92689	7.09656	+		+	+	+	+		amine catabolic process;amine metabolic process;catabolic process;cellular amine metabolic process;cellular biogenic amine catabolic process;cellular biogenic amine metabolic process;cellular metabolic process;cellular nitrogen compound metabolic process;cellular process;metabolic process;nitrogen compound metabolic process;polyamine catabolic process;polyamine metabolic process	acetyltransferase activity;binding;catalytic activity;cation binding;diamine N-acetyltransferase activity;ion binding;metal ion binding;N-acetyltransferase activity;N-acyltransferase activity;transferase activity;transferase activity, transferring acyl groups;transferase activity, transferring acyl groups other than amino-acyl groups		Arginine and proline metabolism	GO:0006576;GO:0006595;GO:0006598;GO:0006807;GO:0008152;GO:0009056;GO:0009308;GO:0009310;GO:0009987;GO:0034641;GO:0042402;GO:0044106;GO:0044237	GO:0003824;GO:0004145;GO:0005488;GO:0008080;GO:0016407;GO:0016410;GO:0016740;GO:0016746;GO:0016747;GO:0043167;GO:0043169;GO:0046872		ko00330	20.006	0	20.675	27967000	29501334	10279633	10099900	3.79493	0.0457285	-0.0109913	3.65964	0.434852	2.87609	0.447169	2.09095	0.45816	2.24466	0.445843	0.0766563	0.0123173	Q9KL03	>sp|Q9KL03|ATDA_VIBCH Spermidine N(1)-acetyltransferase OS=Vibrio cholerae serotype O1 (strain ATCC 39315 / El Tor Inaba N16961) GN=speG PE=1 SV=1
9.01945	9.02938	9.06937	9.03108	8.9742	8.99959	8.70421	8.66134	8.67927	8.46052	8.5978	8.59786	+		+	+	+	+			active transmembrane transporter activity;alpha-glucoside transmembrane transporter activity;ATPase activity;ATPase activity, coupled;ATPase activity, coupled to movement of substances;ATPase activity, coupled to transmembrane movement of substances;carbohydrate transmembrane transporter activity;catalytic activity;disaccharide transmembrane transporter activity;glucoside transmembrane transporte…		ABC transporters;Bacterial chemotaxis		GO:0003824;GO:0005215;GO:0005363;GO:0015144;GO:0015151;GO:0015154;GO:0015157;GO:0015399;GO:0015405;GO:0015422;GO:0015423;GO:0016462;GO:0016787;GO:0016817;GO:0016818;GO:0016820;GO:0016887;GO:0017111;GO:0022804;GO:0022857;GO:0022891;GO:0022892;GO:0042623;GO:0042626;GO:0042947;GO:0043492;GO:0051119		ko02010;ko02030	323.31	0	43.806	1096333312	1005196672	480800000	360333344	5.64854	0.775833	0.0377747	4.26898	0.357793	3.26718	0.487339	3.11829	0.449565	3.99732	0.320019	1.28095	0.129546	Q9KL05	>tr|Q9KL05|Q9KL05_VIBCH Maltose ABC transporter, periplasmic maltose-binding protein OS=Vibrio cholerae serotype O1 (strain ATCC 39315 / El Tor Inaba N16961) GN=VC_A0945 PE=4 SV=1
8.49367	8.44202	8.47783	8.4847	8.46341	8.52187	8.25481	8.30363	8.25648	8.21948	8.20175	8.29794	+		+	+	+	+		biosynthetic process;cellular aromatic compound metabolic process;cellular biosynthetic process;cellular metabolic process;cellular nitrogen compound biosynthetic process;cellular nitrogen compound metabolic process;cellular process;'de novo' UMP biosynthetic process;heterocycle biosynthetic process;heterocycle metabolic process;metabolic process;nitrogen compound metabolic process;nucleobase bio…	binding;catalytic activity;cation binding;dihydroorotase activity;hydrolase activity;hydrolase activity, acting on carbon-nitrogen (but not peptide) bonds;hydrolase activity, acting on carbon-nitrogen (but not peptide) bonds, in cyclic amides;ion binding;metal ion binding;transition metal ion binding;zinc ion binding		Pyrimidine metabolism	GO:0006139;GO:0006206;GO:0006213;GO:0006220;GO:0006221;GO:0006222;GO:0006725;GO:0006753;GO:0006807;GO:0008152;GO:0009058;GO:0009112;GO:0009116;GO:0009117;GO:0009119;GO:0009123;GO:0009124;GO:0009129;GO:0009130;GO:0009156;GO:0009161;GO:0009165;GO:0009173;GO:0009174;GO:0009218;GO:0009220;GO:0009259;GO:0009260;GO:0009987;GO:0018130;GO:0019856;GO:0034641;GO:0034654;GO:0044205;GO:0044237;GO:0044238;GO:…	GO:0003824;GO:0004151;GO:0005488;GO:0008270;GO:0016787;GO:0016810;GO:0016812;GO:0043167;GO:0043169;GO:0046872;GO:0046914		ko00240	250.57	0	37.461	296283328	309506656	187170000	174490000	4.48895	0.339527	-0.0188204	3.07745	0.199534	2.6492	0.231452	2.73477	0.250272	3.13381	0.218355	0.402274	0.0319176	Q9KL24	>sp|Q9KL24|PYRC_VIBCH Dihydroorotase OS=Vibrio cholerae serotype O1 (strain ATCC 39315 / El Tor Inaba N16961) GN=pyrC PE=1 SV=2
NaN	6.43375	6.41228	6.45195	6.51953	6.50943	6.64544	6.86326	6.71797	6.87432	6.79977	6.84433	+		+	+	+	+		establishment of localization;transport	2 iron, 2 sulfur cluster binding;binding;catalytic activity;cation binding;cofactor binding;electron carrier activity;ion binding;iron-sulfur cluster binding;metal cluster binding;metal ion binding;molybdenum ion binding;oxidoreductase activity;pyridoxal phosphate binding;transition metal ion binding;vitamin B6 binding;vitamin binding			GO:0006810;GO:0051234	GO:0003824;GO:0005488;GO:0009055;GO:0016491;GO:0019842;GO:0030151;GO:0030170;GO:0043167;GO:0043169;GO:0046872;GO:0046914;GO:0048037;GO:0051536;GO:0051537;GO:0051540;GO:0070279			44.611	0	73.722	1.76627e+06	3123500	5.64757e+06	6.92707e+06	3.32058	1.0545	-0.0706225	1.50749	-0.319208	3.1318	-0.416461	3.47914	-0.345838	1.6766	-0.248586	0.650438	-0.0972527	Q9KL25	>tr|Q9KL25|Q9KL25_VIBCH Uncharacterized protein OS=Vibrio cholerae serotype O1 (strain ATCC 39315 / El Tor Inaba N16961) GN=VC_A0924 PE=4 SV=1
6.82321	6.83639	6.81981	6.76575	6.79156	6.77966	6.74671	6.81115	6.73402	6.88555	6.8234	6.81036	+	+							catalytic activity;transferase activity;transferase activity, transferring acyl groups				GO:0003824;GO:0016740;GO:0016746			96.805	0	42.388	6.70703e+06	6.01337e+06	5.82497e+06	6934700	1.40014	2.2066	0.0474817	1.20379	0.062511	0.218029	-0.0132987	1.17278	-0.0607804	0.236332	0.0150293	1.07036	-0.0758096	Q9KL28	>tr|Q9KL28|Q9KL28_VIBCH Uncharacterized protein OS=Vibrio cholerae serotype O1 (strain ATCC 39315 / El Tor Inaba N16961) GN=VC_A0921 PE=4 SV=1
6.64618	6.74076	7.0214	6.93994	7.01724	6.95062	7.13264	7.17687	6.99709	7.22557	7.29126	7.10809	+			+	+			biosynthetic process;cellular biosynthetic process;cellular macromolecule biosynthetic process;cellular macromolecule metabolic process;cellular metabolic process;cellular nitrogen compound metabolic process;cellular process;macromolecule biosynthetic process;macromolecule metabolic process;metabolic process;nitrogen compound metabolic process;nucleic acid metabolic process;nucleobase-containing …	binding;DNA binding;nucleic acid binding;nucleic acid binding transcription factor activity;sequence-specific DNA binding transcription factor activity			GO:0006139;GO:0006351;GO:0006807;GO:0008152;GO:0009058;GO:0009059;GO:0009987;GO:0016070;GO:0032774;GO:0034641;GO:0034645;GO:0043170;GO:0044237;GO:0044238;GO:0044249;GO:0044260;GO:0090304	GO:0001071;GO:0003676;GO:0003677;GO:0003700;GO:0005488			105.56	0	18.749	6812600	9346233	12844067	16397000	1.79863	0.653595	-0.166488	1.12672	-0.299422	1.50363	-0.405526	1.81628	-0.239038	1.05428	-0.132934	0.627391	-0.106104	Q9KL32	>tr|Q9KL32|Q9KL32_VIBCH Transcriptional regulator, TetR family OS=Vibrio cholerae serotype O1 (strain ATCC 39315 / El Tor Inaba N16961) GN=VC_A0917 PE=4 SV=1
6.73965	6.73135	6.85973	6.87735	6.88975	6.86446	6.90873	6.94971	6.89081	6.77152	6.77424	6.77621	+		+		+		+	cellular metabolic process;cellular process;metabolic process;organic acid metabolic process;organic acid phosphorylation;phosphate-containing compound metabolic process;phosphorus metabolic process;phosphorylation;small molecule metabolic process	catalytic activity;glycerate kinase activity;kinase activity;phosphotransferase activity, alcohol group as acceptor;transferase activity;transferase activity, transferring phosphorus-containing groups		Glycerolipid metabolism;Glycine, serine and threonine metabolism;Glyoxylate and dicarboxylate metabolism;Methane metabolism	GO:0006082;GO:0006793;GO:0006796;GO:0008152;GO:0009987;GO:0016310;GO:0031388;GO:0044237;GO:0044281	GO:0003824;GO:0008887;GO:0016301;GO:0016740;GO:0016772;GO:0016773		ko00260;ko00561;ko00630;ko00680	117.04	0	39.383	6039300	7.53893e+06	8.26273e+06	5.94287e+06	2.34763	1.11973	-0.100276	1.44136	-0.139507	0.0235153	0.00291936	3.808	0.103196	0.972529	-0.0392311	2.90798	0.142427	Q9KL45	>tr|Q9KL45|Q9KL45_VIBCH Uncharacterized protein OS=Vibrio cholerae serotype O1 (strain ATCC 39315 / El Tor Inaba N16961) GN=VC_A0903 PE=3 SV=1
8.45791	8.46614	8.48832	8.44869	8.46833	8.4637	8.58213	8.59055	8.68289	8.4947	8.50539	8.47712	+		+		+	+	+	alcohol catabolic process;alcohol metabolic process;aldonic acid metabolic process;carbohydrate catabolic process;carbohydrate metabolic process;carboxylic acid metabolic process;catabolic process;cellular carbohydrate catabolic process;cellular carbohydrate metabolic process;cellular ketone metabolic process;cellular metabolic process;cellular nitrogen compound metabolic process;cellular process…	binding;catalytic activity;coenzyme binding;cofactor binding;NADP binding;nucleotide binding;oxidoreductase activity;oxidoreductase activity, acting on CH-OH group of donors;oxidoreductase activity, acting on the CH-OH group of donors, NAD or NADP as acceptor;phosphogluconate dehydrogenase (decarboxylating) activity		Glutathione metabolism;Pentose phosphate pathway	GO:0005975;GO:0005996;GO:0006006;GO:0006007;GO:0006066;GO:0006082;GO:0006098;GO:0006139;GO:0006732;GO:0006733;GO:0006739;GO:0006740;GO:0006753;GO:0006807;GO:0008152;GO:0009056;GO:0009117;GO:0009987;GO:0016052;GO:0019318;GO:0019320;GO:0019362;GO:0019520;GO:0019521;GO:0019752;GO:0032787;GO:0034641;GO:0042180;GO:0043436;GO:0044237;GO:0044238;GO:0044262;GO:0044275;GO:0044281;GO:0044282;GO:0046164;GO:…	GO:0000166;GO:0003824;GO:0004616;GO:0005488;GO:0016491;GO:0016614;GO:0016616;GO:0048037;GO:0050661;GO:0050662		ko00030;ko00480	323.31	0	52.591	295790016	288616672	417806656	310856672	3.14728	0.413772	0.0105521	1.9343	-0.14773	0.815779	-0.0216115	1.46957	-0.0321636	2.07061	-0.158282	1.71379	0.126119	Q9KL50	>tr|Q9KL50|Q9KL50_VIBCH 6-phosphogluconate dehydrogenase, decarboxylating OS=Vibrio cholerae serotype O1 (strain ATCC 39315 / El Tor Inaba N16961) GN=VC_A0898 PE=3 SV=1
8.46078	8.45333	8.40216	8.36521	8.37847	8.36261	8.50901	8.50544	8.39662	8.50176	8.44061	8.48359	+	+			+			alcohol catabolic process;alcohol metabolic process;carbohydrate catabolic process;carbohydrate metabolic process;catabolic process;cellular carbohydrate catabolic process;cellular carbohydrate metabolic process;cellular metabolic process;cellular nitrogen compound metabolic process;cellular process;coenzyme metabolic process;cofactor metabolic process;glucose catabolic process;glucose metabolic …	binding;catalytic activity;coenzyme binding;cofactor binding;glucose-6-phosphate dehydrogenase activity;NADP binding;nucleotide binding;oxidoreductase activity;oxidoreductase activity, acting on CH-OH group of donors;oxidoreductase activity, acting on the CH-OH group of donors, NAD or NADP as acceptor		Glutathione metabolism;Pentose phosphate pathway	GO:0005975;GO:0005996;GO:0006006;GO:0006007;GO:0006066;GO:0006098;GO:0006139;GO:0006732;GO:0006733;GO:0006739;GO:0006740;GO:0006753;GO:0006807;GO:0008152;GO:0009056;GO:0009117;GO:0009987;GO:0016052;GO:0019318;GO:0019320;GO:0019362;GO:0034641;GO:0044237;GO:0044238;GO:0044262;GO:0044275;GO:0044281;GO:0044282;GO:0046164;GO:0046365;GO:0046483;GO:0046496;GO:0051186;GO:0055086;GO:0055114;GO:0072524	GO:0000166;GO:0003824;GO:0004345;GO:0005488;GO:0016491;GO:0016614;GO:0016616;GO:0048037;GO:0050661;GO:0050662		ko00030;ko00480	323.31	0	57.365	275123328	233786672	297436672	299273344	1.44839	1.67001	0.0699924	0.313228	-0.0315994	0.638019	-0.036562	2.3221	-0.106554	1.28045	-0.101592	0.0410962	-0.0049626	Q9KL52	>tr|Q9KL52|Q9KL52_VIBCH Glucose-6-phosphate 1-dehydrogenase OS=Vibrio cholerae serotype O1 (strain ATCC 39315 / El Tor Inaba N16961) GN=zwf PE=3 SV=1
6.46635	NaN	6.49202	6.67116	6.55324	6.59087	6.63899	6.63833	6.66035	6.63549	6.76125	6.67803	+		+	+												19.128	0	14.344	2010400	4054300	4426000	4951900	1.98712	1.14773	-0.125909	2.954	-0.166706	1.6538	-0.212406	0.786836	-0.0864976	0.502034	-0.0407974	0.535519	-0.0457002	Q9KL58	>tr|Q9KL58|Q9KL58_VIBCH Glyoxylase I family protein OS=Vibrio cholerae serotype O1 (strain ATCC 39315 / El Tor Inaba N16961) GN=VC_A0890 PE=4 SV=1
8.59578	8.60167	8.57022	8.57907	8.59638	8.53685	8.42344	8.45013	8.38785	8.36836	8.31209	8.43435	+		+	+	+	+		amine catabolic process;amine metabolic process;aspartate family amino acid catabolic process;aspartate family amino acid metabolic process;biosynthetic process;carboxylic acid catabolic process;carboxylic acid metabolic process;catabolic process;cellular amine metabolic process;cellular amino acid catabolic process;cellular amino acid metabolic process;cellular catabolic process;cellular ketone …	acetyltransferase activity;binding;C-acetyltransferase activity;C-acyltransferase activity;catalytic activity;cofactor binding;glycine C-acetyltransferase activity;ligase activity;pyridoxal phosphate binding;transferase activity;transferase activity, transferring acyl groups;transferase activity, transferring acyl groups other than amino-acyl groups;vitamin B6 binding;vitamin binding		Glycine, serine and threonine metabolism	GO:0006082;GO:0006520;GO:0006566;GO:0006567;GO:0006807;GO:0008152;GO:0009056;GO:0009058;GO:0009063;GO:0009066;GO:0009068;GO:0009308;GO:0009310;GO:0009987;GO:0016054;GO:0019752;GO:0034641;GO:0042180;GO:0043436;GO:0044106;GO:0044237;GO:0044238;GO:0044248;GO:0044281;GO:0044282;GO:0046395	GO:0003824;GO:0005488;GO:0008890;GO:0016407;GO:0016408;GO:0016453;GO:0016740;GO:0016746;GO:0016747;GO:0016874;GO:0019842;GO:0030170;GO:0048037;GO:0070279		ko00260	227.04	0	43.271	388540000	372803328	263766672	236853328	3.60867	0.385738	0.0184555	2.92869	0.168749	2.39547	0.217623	2.13822	0.199167	2.39772	0.150293	0.544572	0.0488739	Q9KL61	>tr|Q9KL61|Q9KL61_VIBCH 2-amino-3-ketobutyrate coenzyme A ligase OS=Vibrio cholerae serotype O1 (strain ATCC 39315 / El Tor Inaba N16961) GN=kbl PE=3 SV=1
8.35268	8.27584	8.26038	8.2754	8.24509	8.24947	8.14854	8.22458	8.139	8.10483	8.05907	8.18324	+		+	+	+	+		amine catabolic process;amine metabolic process;aspartate family amino acid catabolic process;aspartate family amino acid metabolic process;carboxylic acid catabolic process;carboxylic acid metabolic process;catabolic process;cellular amine metabolic process;cellular amino acid catabolic process;cellular amino acid metabolic process;cellular catabolic process;cellular ketone metabolic process;cel…	binding;catalytic activity;cation binding;ion binding;L-threonine 3-dehydrogenase activity;metal ion binding;oxidoreductase activity;oxidoreductase activity, acting on CH-OH group of donors;oxidoreductase activity, acting on the CH-OH group of donors, NAD or NADP as acceptor;transition metal ion binding;zinc ion binding	cell part;cytoplasm;intracellular part	Glycine, serine and threonine metabolism	GO:0006082;GO:0006520;GO:0006566;GO:0006567;GO:0006807;GO:0008152;GO:0009056;GO:0009063;GO:0009066;GO:0009068;GO:0009308;GO:0009310;GO:0009987;GO:0016054;GO:0019518;GO:0019752;GO:0034641;GO:0042180;GO:0043436;GO:0044106;GO:0044237;GO:0044238;GO:0044248;GO:0044281;GO:0044282;GO:0046395	GO:0003824;GO:0005488;GO:0008270;GO:0008743;GO:0016491;GO:0016614;GO:0016616;GO:0043167;GO:0043169;GO:0046872;GO:0046914	GO:0005737;GO:0044424;GO:0044464	ko00260	155.18	0	37.541	198706672	180660000	148740000	131453336	2.22547	0.588808	0.0396471	1.47958	0.125595	1.76097	0.180589	1.70446	0.140942	1.39703	0.0859477	0.535983	0.0549939	Q9KL62	>sp|Q9KL62|TDH_VIBCH L-threonine 3-dehydrogenase OS=Vibrio cholerae serotype O1 (strain ATCC 39315 / El Tor Inaba N16961) GN=tdh PE=3 SV=1
7.7076	7.96639	7.92011	7.91793	7.87704	7.86389	6.37354	6.5566	NaN	6.65445	6.78981	6.47689	+		+	+	+	+		multi-organism process;pathogenesis		cell part;membrane		GO:0009405;GO:0051704		GO:0016020;GO:0044464		221.74	0	39.002	75584000	77072664	1.98863e+06	4.55813e+06	5.43362	0.0948689	-0.0215886	2.8323	1.39963	3.27484	1.22432	3.76326	1.2459	3.5576	1.42121	0.543503	-0.17531	Q9KL64	>tr|Q9KL64|Q9KL64_VIBCH Uncharacterized protein OS=Vibrio cholerae serotype O1 (strain ATCC 39315 / El Tor Inaba N16961) GN=VC_A0883 PE=4 SV=1
8.41667	8.41501	8.36554	8.44023	8.36192	8.39264	7.94684	7.97774	8.08382	7.91336	7.93449	8.01511	+		+	+	+	+			catalytic activity;hydrolase activity		Primary bile acid biosynthesis;Secondary bile acid biosynthesis		GO:0003824;GO:0016787		ko00120;ko00121	263.36	0	38.938	251023328	250880000	101591000	90484336	5.30931	0.00943339	0.000810623	3.04691	0.396273	3.64385	0.444755	3.49208	0.443944	2.95023	0.395462	0.395596	0.0484824	Q9KL70	>tr|Q9KL70|Q9KL70_VIBCH Hydrolase, putative OS=Vibrio cholerae serotype O1 (strain ATCC 39315 / El Tor Inaba N16961) GN=VC_A0877 PE=4 SV=1
7.42119	7.48038	7.43597	7.49227	7.51004	7.43516	7.60712	7.64995	7.49859	7.82001	7.76642	7.81647	+		+	+	+		+	catabolic process;lipid catabolic process;lipid metabolic process;metabolic process;primary metabolic process	catalytic activity;hydrolase activity;hydrolase activity, acting on ester bonds;lipase activity			GO:0006629;GO:0008152;GO:0009056;GO:0016042;GO:0044238	GO:0003824;GO:0016298;GO:0016787;GO:0016788			188.25	0	83.561	27963000	30221334	38884000	63335668	4.10512	0.507093	-0.0333071	1.34569	-0.139371	3.85854	-0.35512	3.45798	-0.321813	0.986754	-0.106064	1.956	-0.215749	Q9KL83	>sp|Q9KL83|VOLA_VIBCH Lysophospholipase VolA OS=Vibrio cholerae serotype O1 (strain ATCC 39315 / El Tor Inaba N16961) GN=volA PE=1 SV=1
8.45475	8.4102	8.40526	8.3374	8.40382	8.44312	8.29164	8.31035	8.4114	8.27469	8.2686	8.29217	+			+	+				catalytic activity;oxidoreductase activity				GO:0003824;GO:0016491			289.19	0	34.729	265450000	249430000	219310000	189933328	1.76709	0.341995	0.0286242	0.994016	0.0856094	2.95907	0.14492	1.67143	0.116296	0.517585	0.0569852	0.716045	0.0593106	Q9KL87	>tr|Q9KL87|Q9KL87_VIBCH Oxidoreductase, aldo/keto reductase 2 family OS=Vibrio cholerae serotype O1 (strain ATCC 39315 / El Tor Inaba N16961) GN=VC_A0859 PE=4 SV=1
7.81293	7.7261	7.78338	8.12441	8.04202	8.10435	7.71234	7.67629	7.74858	7.97372	7.92778	8.04821	+	+		+		+	+									323.31	0	341.49	59651000	123496664	51690000	96849000	4.54022	3.05293	-0.316122	0.872212	0.0617342	2.06977	-0.209096	1.1711	0.107026	3.50919	0.377856	2.57195	-0.27083	Q9KL97	>tr|Q9KL97|Q9KL97_VIBCH Uncharacterized protein OS=Vibrio cholerae serotype O1 (strain ATCC 39315 / El Tor Inaba N16961) GN=VC_A0849 PE=4 SV=1
9.05465	8.986	8.97863	9.00915	9.00565	9.04261	8.94593	8.96882	8.9336	8.93239	8.93055	8.94229	+			+	+	+		alcohol catabolic process;alcohol metabolic process;carbohydrate catabolic process;carbohydrate metabolic process;catabolic process;cellular carbohydrate catabolic process;cellular carbohydrate metabolic process;cellular metabolic process;cellular process;generation of precursor metabolites and energy;glucose catabolic process;glucose metabolic process;glycolysis;hexose catabolic process;hexose m…	binding;catalytic activity;coenzyme binding;cofactor binding;glyceraldehyde-3-phosphate dehydrogenase (NAD+) (phosphorylating) activity;NAD binding;NADP binding;nucleotide binding;oxidoreductase activity;oxidoreductase activity, acting on the aldehyde or oxo group of donors;oxidoreductase activity, acting on the aldehyde or oxo group of donors, NAD or NADP as acceptor		Alzheimer's disease;Glycolysis / Gluconeogenesis	GO:0005975;GO:0005996;GO:0006006;GO:0006007;GO:0006066;GO:0006091;GO:0006096;GO:0008152;GO:0009056;GO:0009987;GO:0016052;GO:0019318;GO:0019320;GO:0044237;GO:0044238;GO:0044262;GO:0044275;GO:0044281;GO:0044282;GO:0046164;GO:0046365	GO:0000166;GO:0003824;GO:0004365;GO:0005488;GO:0016491;GO:0016620;GO:0016903;GO:0048037;GO:0050661;GO:0050662;GO:0051287		ko00010;ko05010	323.31	0	55.67	1018120000	1045833344	890626688	861206656	2.0881	0.179565	-0.0127134	1.01632	0.0569773	1.3618	0.0713501	2.61601	0.0840635	1.949	0.0696907	0.586151	0.0143728	Q9KLA3	>tr|Q9KLA3|Q9KLA3_VIBCH Glyceraldehyde 3-phosphate dehydrogenase OS=Vibrio cholerae serotype O1 (strain ATCC 39315 / El Tor Inaba N16961) GN=VC_A0843 PE=3 SV=1
7.37079	7.43326	7.50583	7.36717	7.46659	7.359	7.48128	7.51489	7.47531	7.56196	7.58872	7.48083	+				+				catalytic activity;methyltransferase activity;transferase activity;transferase activity, transferring one-carbon groups				GO:0003824;GO:0008168;GO:0016740;GO:0016741			172.25	0	23.336	27551000	25142334	30963334	35173000	1.32034	0.304861	0.0390401	0.587786	-0.05387	0.990729	-0.10721	1.43452	-0.14625	1.18976	-0.0929101	0.70103	-0.0533398	Q9KLB4	>tr|Q9KLB4|Q9KLB4_VIBCH Methyltransferase, putative OS=Vibrio cholerae serotype O1 (strain ATCC 39315 / El Tor Inaba N16961) GN=VC_A0832 PE=4 SV=1
6.89386	7.04548	6.87222	7.17237	7.08483	7.07526	6.74497	6.73681	6.45025	6.90686	6.91232	6.77352	+				+	+		amine catabolic process;amine metabolic process;aromatic amino acid family catabolic process;aromatic amino acid family metabolic process;aromatic compound catabolic process;carboxylic acid catabolic process;carboxylic acid metabolic process;catabolic process;cellular amine metabolic process;cellular amino acid catabolic process;cellular amino acid metabolic process;cellular aromatic compound met…	binding;catalytic activity;cation binding;ion binding;iron ion binding;metal ion binding;monooxygenase activity;oxidoreductase activity;oxidoreductase activity, acting on paired donors, with incorporation or reduction of molecular oxygen;oxidoreductase activity, acting on paired donors, with incorporation or reduction of molecular oxygen, reduced pteridine as one donor, and incorporation of one a…		Phenylalanine metabolism;Phenylalanine, tyrosine and tryptophan biosynthesis	GO:0006082;GO:0006520;GO:0006558;GO:0006559;GO:0006725;GO:0006807;GO:0008152;GO:0009056;GO:0009063;GO:0009072;GO:0009074;GO:0009308;GO:0009310;GO:0009987;GO:0016054;GO:0019439;GO:0019752;GO:0034641;GO:0042180;GO:0043436;GO:0044106;GO:0044237;GO:0044238;GO:0044248;GO:0044281;GO:0044282;GO:0046395	GO:0003824;GO:0004497;GO:0004505;GO:0005488;GO:0005506;GO:0016491;GO:0016705;GO:0016714;GO:0043167;GO:0043169;GO:0046872;GO:0046914		ko00360;ko00400	38.524	0	33.445	8795600	12973667	4611300	7.39263e+06	2.31868	1.2987	-0.173632	1.23827	0.293174	0.441513	0.0729532	1.96269	0.246585	1.99515	0.466806	0.963742	-0.220221	Q9KLB8	>sp|Q9KLB8|PH4H_VIBCH Phenylalanine-4-hydroxylase OS=Vibrio cholerae serotype O1 (strain ATCC 39315 / El Tor Inaba N16961) GN=phhA PE=3 SV=1
8.26323	8.17228	8.17105	8.28747	8.29524	8.26862	8.16655	8.11301	8.08429	8.18814	8.09885	8.13969	+				+	+		amine biosynthetic process;amine catabolic process;amine metabolic process;arginine catabolic process;arginine metabolic process;biosynthetic process;carboxylic acid catabolic process;carboxylic acid metabolic process;catabolic process;cellular amine metabolic process;cellular amino acid catabolic process;cellular amino acid metabolic process;cellular biogenic amine biosynthetic process;cellular …	arginine decarboxylase activity;binding;carbon-carbon lyase activity;carboxy-lyase activity;catalytic activity;cation binding;ion binding;lyase activity;metal ion binding		Arginine and proline metabolism	GO:0006082;GO:0006520;GO:0006525;GO:0006527;GO:0006576;GO:0006595;GO:0006596;GO:0006807;GO:0008152;GO:0008216;GO:0008295;GO:0009056;GO:0009058;GO:0009063;GO:0009064;GO:0009065;GO:0009308;GO:0009309;GO:0009310;GO:0009987;GO:0016054;GO:0019752;GO:0034641;GO:0042180;GO:0042401;GO:0043436;GO:0044106;GO:0044237;GO:0044238;GO:0044248;GO:0044249;GO:0044271;GO:0044281;GO:0044282;GO:0046395	GO:0003824;GO:0005488;GO:0008792;GO:0016829;GO:0016830;GO:0016831;GO:0043167;GO:0043169;GO:0046872		ko00330	270.17	0	72.248	160096672	192273328	132626664	139240000	2.28364	1.21582	-0.0815865	0.974716	0.0809075	0.682	0.059962	2.19926	0.141548	2.51567	0.162494	0.232848	-0.0209455	Q9KLD1	>sp|Q9KLD1|SPEA_VIBCH Biosynthetic arginine decarboxylase OS=Vibrio cholerae serotype O1 (strain ATCC 39315 / El Tor Inaba N16961) GN=speA PE=3 SV=2
8.45529	8.343	8.36229	8.3479	8.33062	8.38144	8.1672	8.15906	8.25681	8.11949	8.09328	8.19585	+		+	+	+	+		amine biosynthetic process;amine metabolic process;biosynthetic process;cellular amine metabolic process;cellular biogenic amine biosynthetic process;cellular biogenic amine metabolic process;cellular biosynthetic process;cellular metabolic process;cellular nitrogen compound biosynthetic process;cellular nitrogen compound metabolic process;cellular process;metabolic process;nitrogen compound meta…	agmatinase activity;binding;catalytic activity;cation binding;hydrolase activity;hydrolase activity, acting on carbon-nitrogen (but not peptide) bonds;hydrolase activity, acting on carbon-nitrogen (but not peptide) bonds, in linear amidines;ion binding;metal ion binding		Arginine and proline metabolism	GO:0006576;GO:0006595;GO:0006596;GO:0006807;GO:0008152;GO:0009058;GO:0009308;GO:0009309;GO:0009987;GO:0034641;GO:0042401;GO:0044106;GO:0044237;GO:0044249;GO:0044271	GO:0003824;GO:0005488;GO:0008783;GO:0016787;GO:0016810;GO:0016813;GO:0043167;GO:0043169;GO:0046872		ko00330	229.94	0	33.945	245293328	225856672	157276672	137536672	3.15499	0.372275	0.033541	1.83551	0.192502	2.24707	0.250654	2.50152	0.217113	1.99289	0.158961	0.591925	0.0581519	Q9KLD2	>tr|Q9KLD2|Q9KLD2_VIBCH Agmatinase OS=Vibrio cholerae serotype O1 (strain ATCC 39315 / El Tor Inaba N16961) GN=VC_A0814 PE=3 SV=1
7.30914	7.31349	7.35445	7.21735	7.2398	7.16256	7.36446	7.26816	7.45517	7.15924	7.12031	7.13399	+	+		+			+	amine metabolic process;aminoglycan catabolic process;aminoglycan metabolic process;carbohydrate catabolic process;carbohydrate metabolic process;catabolic process;chitin catabolic process;chitin metabolic process;macromolecule catabolic process;macromolecule metabolic process;metabolic process;nitrogen compound metabolic process;polysaccharide catabolic process;polysaccharide metabolic process;p…	binding;carbohydrate binding;catalytic activity;chitin binding;chitinase activity;hydrolase activity;hydrolase activity, acting on glycosyl bonds;hydrolase activity, hydrolyzing O-glycosyl compounds;pattern binding;polysaccharide binding	extracellular region;viral capsid;virion part		GO:0000272;GO:0005975;GO:0005976;GO:0006022;GO:0006026;GO:0006030;GO:0006032;GO:0006807;GO:0008152;GO:0009056;GO:0009057;GO:0009308;GO:0016052;GO:0043170;GO:0044238	GO:0001871;GO:0003824;GO:0004553;GO:0004568;GO:0005488;GO:0008061;GO:0016787;GO:0016798;GO:0030246;GO:0030247	GO:0005576;GO:0019028;GO:0044423		117.16	0	53.627	21192334	16135000	23402666	13745000	2.54578	1.93055	0.119122	0.263448	-0.0368989	3.28562	0.18785	1.25922	0.068728	1.24861	-0.156021	1.81849	0.224749	Q9KLD5	>sp|Q9KLD5|GBPA_VIBCH GlcNAc-binding protein A OS=Vibrio cholerae serotype O1 (strain ATCC 39315 / El Tor Inaba N16961) GN=gbpA PE=1 SV=1
7.81669	7.83001	7.77766	7.77951	7.85346	7.84645	7.73148	7.76875	7.89726	7.61822	7.62586	7.69345	+			+	+				active transmembrane transporter activity;ATPase activity;ATPase activity, coupled;ATPase activity, coupled to movement of substances;ATPase activity, coupled to transmembrane movement of substances;catalytic activity;hydrolase activity;hydrolase activity, acting on acid anhydrides;hydrolase activity, acting on acid anhydrides, catalyzing transmembrane movement of substances;hydrolase activity, a…		ABC transporters;ko05152;Two-component system		GO:0003824;GO:0005215;GO:0015399;GO:0015405;GO:0016462;GO:0016787;GO:0016817;GO:0016818;GO:0016820;GO:0016887;GO:0017111;GO:0022804;GO:0022857;GO:0042623;GO:0042626;GO:0043492		ko02010;ko02020;ko05152	183.17	0	30.393	64370000	67255664	63845000	44379000	1.92739	0.257801	-0.0183525	0.0589443	0.00895754	2.32218	0.162281	2.23917	0.180634	0.188228	0.0273101	1.29229	0.153323	Q9KLD9	>tr|Q9KLD9|Q9KLD9_VIBCH ABC transporter, periplasmic substrate-binding protein OS=Vibrio cholerae serotype O1 (strain ATCC 39315 / El Tor Inaba N16961) GN=VC_A0807 PE=1 SV=1
7.77245	7.83289	7.859	7.74055	7.67904	7.79491	8.09899	8.12555	8.01858	8.13577	8.1564	8.10315	+		+	+	+	+		catabolic process;cellular catabolic process;cellular macromolecule catabolic process;cellular macromolecule metabolic process;cellular metabolic process;cellular nitrogen compound metabolic process;cellular process;macromolecule catabolic process;macromolecule metabolic process;metabolic process;mRNA catabolic process;mRNA metabolic process;nitrogen compound metabolic process;nucleic acid metabo…	3'-5' exonuclease activity;binding;catalytic activity;exonuclease activity;exonuclease activity, active with either ribo- or deoxyribonucleic acids and producing 5'-phosphomonoesters;exoribonuclease activity;exoribonuclease activity, producing 5'-phosphomonoesters;exoribonuclease II activity;hydrolase activity;hydrolase activity, acting on ester bonds;nuclease activity;nucleic acid binding;ribonu…	cell part;cytoplasm;intracellular part		GO:0006139;GO:0006401;GO:0006402;GO:0006807;GO:0008152;GO:0009056;GO:0009057;GO:0009987;GO:0016070;GO:0016071;GO:0034641;GO:0043170;GO:0044237;GO:0044238;GO:0044248;GO:0044260;GO:0044265;GO:0090304	GO:0003676;GO:0003723;GO:0003824;GO:0004518;GO:0004527;GO:0004532;GO:0004540;GO:0005488;GO:0008408;GO:0008859;GO:0016787;GO:0016788;GO:0016796;GO:0016896	GO:0005737;GO:0044424;GO:0044464		230.04	0	76.148	66518000	55047332	121163336	135620000	4.7563	0.92286	0.0832788	2.49201	-0.259591	3.30977	-0.310327	3.35964	-0.393606	2.74696	-0.34287	0.641506	-0.0507361	Q9KLE1	>sp|Q9KLE1|RNB_VIBCH Exoribonuclease 2 OS=Vibrio cholerae serotype O1 (strain ATCC 39315 / El Tor Inaba N16961) GN=rnb PE=3 SV=1
6.71649	6.73709	6.54107	6.17869	6.21096	6.54464	7.25554	7.47815	6.98777	7.30055	7.34969	7.34963	+		+	+	+	+										78.588	0	61.028	4.71347e+06	2213000	19268134	21572334	3.67678	1.25239	0.353452	1.68816	-0.575605	3.31524	-0.668407	3.00791	-1.02186	2.14231	-0.929057	0.258891	-0.0928016	Q9KLF8	>tr|Q9KLF8|Q9KLF8_VIBCH Uncharacterized protein OS=Vibrio cholerae serotype O1 (strain ATCC 39315 / El Tor Inaba N16961) GN=VC_A0786 PE=4 SV=1
6.98998	7.05185	7.03169	6.91089	6.98567	7.02135	7.41276	7.3566	7.2796	7.39184	7.26055	7.41999	+		+	+	+	+			catalytic activity;oxidoreductase activity				GO:0003824;GO:0016491			224.66	0	44.832	10598967	9441433	22545000	23057666	4.08236	0.625767	0.0518691	2.79755	-0.325148	2.50256	-0.332952	2.54643	-0.384821	2.76471	-0.377017	0.0425713	-0.00780376	Q9KLG0	>sp|Q9KLG0|FABV2_VIBCH Enoyl-[acyl-carrier-protein] reductase [NADH] 2 OS=Vibrio cholerae serotype O1 (strain ATCC 39315 / El Tor Inaba N16961) GN=fabV2 PE=3 SV=1
8.3264	8.33058	8.33401	8.42596	8.4321	8.46827	8.31977	8.30645	8.3505	8.30272	8.27059	8.33062	+	+			+	+		alcohol metabolic process;carbohydrate metabolic process;cellular carbohydrate metabolic process;cellular metabolic process;cellular process;galactose metabolic process;hexose metabolic process;metabolic process;monosaccharide metabolic process;primary metabolic process;small molecule metabolic process	binding;catalytic activity;coenzyme binding;cofactor binding;isomerase activity;racemase and epimerase activity;racemase and epimerase activity, acting on carbohydrates and derivatives;UDP-glucose 4-epimerase activity		Amino sugar and nucleotide sugar metabolism;Galactose metabolism	GO:0005975;GO:0005996;GO:0006012;GO:0006066;GO:0008152;GO:0009987;GO:0019318;GO:0044237;GO:0044238;GO:0044262;GO:0044281	GO:0003824;GO:0003978;GO:0005488;GO:0016853;GO:0016854;GO:0016857;GO:0048037;GO:0050662		ko00052;ko00520	286.66	0	36.971	213963328	277023328	211820000	200446672	3.64517	2.94955	-0.111783	0.132291	0.00475534	0.763793	0.0290203	2.52917	0.140804	2.48368	0.116539	0.486612	0.024265	Q9KLH0	>tr|Q9KLH0|Q9KLH0_VIBCH UDP-glucose 4-epimerase OS=Vibrio cholerae serotype O1 (strain ATCC 39315 / El Tor Inaba N16961) GN=VC_A0774 PE=4 SV=1
8.02346	8.15531	8.11929	8.05729	8.11005	8.07893	7.72914	7.59055	7.84754	7.61752	7.7113	7.65671	+		+	+	+	+			active transmembrane transporter activity;amine transmembrane transporter activity;amine-transporting ATPase activity;amino acid transmembrane transporter activity;amino acid-transporting ATPase activity;arginine transmembrane transporter activity;arginine-importing ATPase activity;ATPase activity;ATPase activity, coupled;ATPase activity, coupled to movement of substances;ATPase activity, coupled…	cell part;external encapsulating structure part;outer membrane-bounded periplasmic space;periplasmic space	ABC transporters		GO:0003824;GO:0005215;GO:0005275;GO:0005342;GO:0015171;GO:0015174;GO:0015179;GO:0015181;GO:0015399;GO:0015405;GO:0015424;GO:0015426;GO:0015598;GO:0016462;GO:0016787;GO:0016817;GO:0016818;GO:0016820;GO:0016887;GO:0017111;GO:0022804;GO:0022857;GO:0022891;GO:0022892;GO:0031263;GO:0042623;GO:0042626;GO:0043492;GO:0046943	GO:0030288;GO:0042597;GO:0044462;GO:0044464	ko02010	252.89	0	26.64	126716664	120956664	54315000	46084668	3.7921	0.15269	0.0172628	1.96076	0.376942	3.10091	0.437505	3.75459	0.420242	2.04513	0.359679	0.31294	0.0605636	Q9KLI5	>tr|Q9KLI5|Q9KLI5_VIBCH Arginine ABC transporter, periplasmic arginine-binding protein OS=Vibrio cholerae serotype O1 (strain ATCC 39315 / El Tor Inaba N16961) GN=VC_A0759 PE=3 SV=1
7.7503	7.76786	7.74217	7.74607	7.74646	7.77449	7.88222	7.92791	8.01004	7.8909	7.76987	7.89451	+		+			+		biosynthetic process;carboxylic acid biosynthetic process;carboxylic acid metabolic process;cellular biosynthetic process;cellular ketone metabolic process;cellular lipid metabolic process;cellular metabolic process;cellular process;fatty acid biosynthetic process;fatty acid metabolic process;lipid biosynthetic process;lipid metabolic process;metabolic process;monocarboxylic acid metabolic proces…	3-oxoacyl-[acyl-carrier-protein] synthase activity;beta-ketoacyl-acyl-carrier-protein synthase III activity;catalytic activity;fatty acid synthase activity;transferase activity;transferase activity, transferring acyl groups;transferase activity, transferring acyl groups other than amino-acyl groups	cell part;cytoplasm;intracellular part	Fatty acid biosynthesis	GO:0006082;GO:0006629;GO:0006631;GO:0006633;GO:0008152;GO:0008610;GO:0009058;GO:0009987;GO:0016053;GO:0019752;GO:0032787;GO:0042180;GO:0043436;GO:0044237;GO:0044238;GO:0044249;GO:0044255;GO:0044281;GO:0044283;GO:0046394	GO:0003824;GO:0004312;GO:0004315;GO:0016740;GO:0016746;GO:0016747;GO:0033818	GO:0005737;GO:0044424;GO:0044464	ko00061	236.39	0	39.025	56699332	57001000	87764000	71695664	2.33987	0.0642726	-0.00223192	2.0916	-0.186614	1.10986	-0.0983135	1.07463	-0.0960816	2.05715	-0.184382	0.729098	0.0883001	Q9KLJ3	>sp|Q9KLJ3|FABH2_VIBCH 3-oxoacyl-[acyl-carrier-protein] synthase 3 protein 2 OS=Vibrio cholerae serotype O1 (strain ATCC 39315 / El Tor Inaba N16961) GN=fabH2 PE=1 SV=2
8.7904	8.70823	8.73337	8.70569	8.70643	8.73522	8.76248	8.69982	8.73682	8.48336	8.48403	8.54892	+			+	+		+	alcohol catabolic process;alcohol metabolic process;alditol catabolic process;alditol metabolic process;carbohydrate catabolic process;carbohydrate metabolic process;catabolic process;cellular carbohydrate catabolic process;cellular carbohydrate metabolic process;cellular metabolic process;cellular process;glycerol catabolic process;glycerol metabolic process;glycerol-3-phosphate metabolic proces…	adenyl nucleotide binding;adenyl ribonucleotide binding;ATP binding;binding;catalytic activity;glycerol kinase activity;kinase activity;nucleotide binding;phosphotransferase activity, alcohol group as acceptor;purine nucleotide binding;purine ribonucleoside triphosphate binding;purine ribonucleotide binding;ribonucleotide binding;transferase activity;transferase activity, transferring phosphorus-…		Glycerolipid metabolism;Plant-pathogen interaction;PPAR signaling pathway	GO:0005975;GO:0006066;GO:0006071;GO:0006072;GO:0006793;GO:0006796;GO:0008152;GO:0009056;GO:0009987;GO:0016052;GO:0019400;GO:0019405;GO:0019563;GO:0019637;GO:0019751;GO:0044237;GO:0044238;GO:0044262;GO:0044275;GO:0044281;GO:0044282;GO:0046164;GO:0046174	GO:0000166;GO:0003824;GO:0004370;GO:0005488;GO:0005524;GO:0016301;GO:0016740;GO:0016772;GO:0016773;GO:0017076;GO:0030554;GO:0032553;GO:0032555;GO:0032559;GO:0035639		ko00561;ko03320;ko04626	323.31	0	55.65	556386624	519996672	541746688	321026656	4.19916	0.466237	0.0282199	0.132949	0.0109628	2.73088	0.238566	3.04225	0.210346	0.34701	-0.0172571	2.88428	0.227603	Q9KLJ9	>sp|Q9KLJ9|GLPK_VIBCH Glycerol kinase OS=Vibrio cholerae serotype O1 (strain ATCC 39315 / El Tor Inaba N16961) GN=glpK PE=3 SV=1
7.19005	7.2259	7.1962	7.27189	7.17508	7.29813	7.7719	7.83581	7.83918	7.65983	7.71007	7.6679	+		+	+	+	+	+									61.03	0	12.661	16008000	17844666	65571332	47844668	6.83139	0.495448	-0.0443128	4.81387	-0.611577	4.80903	-0.475216	3.35334	-0.430903	3.70578	-0.567265	2.14875	0.136361	Q9KLK2	>sp|Q9KLK2|Y3541_VIBCH UPF0265 protein VC_A0741 OS=Vibrio cholerae serotype O1 (strain ATCC 39315 / El Tor Inaba N16961) GN=VC_A0741 PE=3 SV=1
7.5823	7.592	7.57484	7.42627	7.49643	7.38824	7.62632	7.61855	7.56166	7.7239	7.65674	7.67608	+	+		+	+	+	+									86.785	0	24.207	38291668	27499000	40097668	48584668	3.57487	1.98356	0.146067	0.38362	-0.0191299	2.12077	-0.102526	2.57302	-0.248593	1.92695	-0.165197	1.36555	-0.083396	Q9KLK3	>sp|Q9KLK3|Y3540_VIBCH UPF0502 protein VC_A0740 OS=Vibrio cholerae serotype O1 (strain ATCC 39315 / El Tor Inaba N16961) GN=VC_A0740 PE=3 SV=1
7.05446	7.0577	7.06375	7.14724	7.09646	7.06681	6.70449	6.85219	6.82741	6.90478	6.83563	6.80889	+		+	+	+	+										281.42	0	44.671	11446000	12728667	6.29993e+06	7.10677e+06	3.79789	0.884147	-0.0448672	2.34879	0.26394	2.72264	0.20887	2.62649	0.253737	2.41453	0.308808	0.438411	-0.0550704	Q9KLK5	>tr|Q9KLK5|Q9KLK5_VIBCH Uncharacterized protein OS=Vibrio cholerae serotype O1 (strain ATCC 39315 / El Tor Inaba N16961) GN=VC_A0738 PE=4 SV=1
7.38654	7.49376	7.4553	7.41325	7.32259	7.4136	7.17263	7.2836	7.12962	7.18273	7.14588	7.14953	+		+	+	+	+		biological regulation;carbohydrate transport;establishment of localization;organic substance transport;regulation of biological process;regulation of biosynthetic process;regulation of cellular biosynthetic process;regulation of cellular macromolecule biosynthetic process;regulation of cellular metabolic process;regulation of cellular process;regulation of gene expression;regulation of macromolec…		cell part;periplasmic space	Vibrio cholerae pathogenic cycle	GO:0006355;GO:0006810;GO:0008643;GO:0009889;GO:0010468;GO:0010556;GO:0019219;GO:0019222;GO:0031323;GO:0031326;GO:0050789;GO:0050794;GO:0051171;GO:0051234;GO:0051252;GO:0060255;GO:0065007;GO:0071702;GO:0080090;GO:2000112		GO:0042597;GO:0044464	ko05111	82.561	0	41.196	28018000	24277666	15857333	14444333	3.26166	0.642621	0.062053	1.9649	0.249916	2.98566	0.285822	2.63384	0.223769	1.57146	0.187863	0.309431	0.0359058	Q9KLK6	>sp|Q9KLK6|LUXP_VIBCH Autoinducer 2-binding periplasmic protein LuxP OS=Vibrio cholerae serotype O1 (strain ATCC 39315 / El Tor Inaba N16961) GN=luxP PE=3 SV=1
8.18324	8.16723	8.17205	8.17785	8.1865	8.19111	8.12271	8.12274	8.08572	8.02914	8.00449	8.08583	+		+	+	+	+		cellular metabolic process;cellular process;energy derivation by oxidation of organic compounds;fermentation;generation of precursor metabolites and energy;metabolic process;oxidation-reduction process	alcohol dehydrogenase (NAD) activity;alcohol dehydrogenase activity, iron-dependent;binding;catalytic activity;cation binding;ion binding;metal ion binding;oxidoreductase activity;oxidoreductase activity, acting on CH-OH group of donors;oxidoreductase activity, acting on the CH-OH group of donors, NAD or NADP as acceptor			GO:0006091;GO:0006113;GO:0008152;GO:0009987;GO:0015980;GO:0044237;GO:0055114	GO:0003824;GO:0004022;GO:0004025;GO:0005488;GO:0016491;GO:0016614;GO:0016616;GO:0043167;GO:0043169;GO:0046872			183.36	0	41.986	149356672	153176672	129043336	109943336	3.58544	0.830601	-0.0109854	2.07144	0.063784	2.26619	0.134352	2.39996	0.145338	2.35195	0.0747693	1.22535	0.0705684	Q9KLP1	>tr|Q9KLP1|Q9KLP1_VIBCH Iron-containing alcohol dehydrogenase OS=Vibrio cholerae serotype O1 (strain ATCC 39315 / El Tor Inaba N16961) GN=VC_A0702 PE=4 SV=1
7.06755	7.26951	7.21951	7.29673	7.28448	7.17699	7.18018	7.14286	7.05698	7.54777	7.54875	7.41898	+			+	+		+	amine metabolic process;aminoglycan catabolic process;aminoglycan metabolic process;carbohydrate catabolic process;carbohydrate metabolic process;catabolic process;chitin catabolic process;chitin metabolic process;macromolecule catabolic process;macromolecule metabolic process;metabolic process;nitrogen compound metabolic process;polysaccharide catabolic process;polysaccharide metabolic process;p…	binding;carbohydrate binding;catalytic activity;chitinase activity;hydrolase activity;hydrolase activity, acting on glycosyl bonds;hydrolase activity, hydrolyzing O-glycosyl compounds	extracellular region		GO:0000272;GO:0005975;GO:0005976;GO:0006022;GO:0006026;GO:0006030;GO:0006032;GO:0006807;GO:0008152;GO:0009056;GO:0009057;GO:0009308;GO:0016052;GO:0043170;GO:0044238	GO:0003824;GO:0004553;GO:0004568;GO:0005488;GO:0016787;GO:0016798;GO:0030246	GO:0005576		114.88	0	111.71	15620000	18028666	13479667	32306666	2.75325	0.39644	-0.067207	0.34408	0.0588501	1.89553	-0.319643	1.92935	-0.252436	1.12492	0.126057	2.58901	-0.378493	Q9KLP3	>tr|Q9KLP3|Q9KLP3_VIBCH Chitodextrinase OS=Vibrio cholerae serotype O1 (strain ATCC 39315 / El Tor Inaba N16961) GN=VC_A0700 PE=4 SV=1
7.2199	7.23431	7.2659	7.25883	7.21469	7.2414	7.07394	7.20879	6.96077	7.43415	7.4003	7.40147	+			+	+		+	biological regulation;cation homeostasis;chemical homeostasis;homeostatic process;ion homeostasis;iron ion homeostasis;regulation of biological quality	active transmembrane transporter activity;adenyl nucleotide binding;adenyl ribonucleotide binding;ATP binding;ATPase activity;ATPase activity, coupled;ATPase activity, coupled to movement of substances;ATPase activity, coupled to transmembrane movement of ions;ATPase activity, coupled to transmembrane movement of substances;binding;catalytic activity;cation transmembrane transporter activity;cati…	ATP-binding cassette (ABC) transporter complex;cell part;macromolecular complex;membrane;membrane part;plasma membrane;protein complex	ABC transporters	GO:0042592;GO:0048878;GO:0050801;GO:0055072;GO:0055080;GO:0065007;GO:0065008	GO:0000166;GO:0003824;GO:0005215;GO:0005381;GO:0005488;GO:0005524;GO:0008324;GO:0015075;GO:0015091;GO:0015399;GO:0015405;GO:0015408;GO:0016462;GO:0016787;GO:0016817;GO:0016818;GO:0016820;GO:0016887;GO:0017076;GO:0017111;GO:0019829;GO:0022804;GO:0022857;GO:0022890;GO:0022891;GO:0022892;GO:0030554;GO:0032553;GO:0032555;GO:0032559;GO:0035639;GO:0042623;GO:0042625;GO:0042626;GO:0043492;GO:0046873;GO:…	GO:0005886;GO:0016020;GO:0032991;GO:0043190;GO:0043234;GO:0044425;GO:0044464	ko02010	93.839	0	39.575	17396666	17325334	12388400	25838000	2.71826	0.031283	0.00173505	1.02217	0.158874	3.21672	-0.171935	3.28944	-0.17367	1.01256	0.157139	1.98558	-0.330808	Q9KLQ5	>sp|Q9KLQ5|FBPC_VIBCH Fe(3+) ions import ATP-binding protein FbpC OS=Vibrio cholerae serotype O1 (strain ATCC 39315 / El Tor Inaba N16961) GN=fbpC PE=3 SV=1
9.00715	9.04634	9.06833	9.15679	9.16856	9.2267	8.70115	8.78628	8.90247	8.79978	8.78729	8.85905	+	+	+	+	+	+			active transmembrane transporter activity;ATPase activity;ATPase activity, coupled;ATPase activity, coupled to movement of substances;ATPase activity, coupled to transmembrane movement of substances;catalytic activity;cation transmembrane transporter activity;hydrolase activity;hydrolase activity, acting on acid anhydrides;hydrolase activity, acting on acid anhydrides, catalyzing transmembrane mo…		ABC transporters		GO:0003824;GO:0005215;GO:0005381;GO:0008324;GO:0015075;GO:0015399;GO:0015405;GO:0016462;GO:0016787;GO:0016817;GO:0016818;GO:0016820;GO:0016887;GO:0017111;GO:0022804;GO:0022857;GO:0022890;GO:0022891;GO:0022892;GO:0042623;GO:0042626;GO:0043492;GO:0046873;GO:0046915		ko02010	323.31	0	37.741	1099866624	1531466752	637566656	655416640	3.96028	2.15938	-0.143409	1.79152	0.243977	2.86024	0.225234	3.54664	0.368643	2.4699	0.387386	0.108531	-0.0187429	Q9KLQ7	>tr|Q9KLQ7|Q9KLQ7_VIBCH Iron(III) ABC transporter, periplasmic iron-compound-binding protein OS=Vibrio cholerae serotype O1 (strain ATCC 39315 / El Tor Inaba N16961) GN=VC_A0685 PE=4 SV=1
7.51034	7.46559	7.35062	6.68676	6.74305	6.64131	7.67933	7.64133	7.76344	7.39234	7.39825	7.53315	+	+	+		+	+	+	aromatic compound biosynthetic process;biosynthetic process;cellular aromatic compound metabolic process;cellular biosynthetic process;cellular metabolic process;cellular nitrogen compound biosynthetic process;cellular nitrogen compound metabolic process;cellular process;coenzyme biosynthetic process;coenzyme metabolic process;cofactor biosynthetic process;cofactor metabolic process;electron tran…	4 iron, 4 sulfur cluster binding;binding;catalytic activity;cation binding;electron carrier activity;ion binding;iron ion binding;iron-sulfur cluster binding;metal cluster binding;metal ion binding;molybdenum ion binding;nitrate reductase activity;oxidoreductase activity;oxidoreductase activity, acting on other nitrogenous compounds as donors;transition metal ion binding	cell part;macromolecular complex;nitrate reductase complex;periplasmic space;protein complex	Nitrogen metabolism	GO:0006091;GO:0006725;GO:0006732;GO:0006777;GO:0006807;GO:0008152;GO:0009058;GO:0009108;GO:0009987;GO:0018130;GO:0019438;GO:0019720;GO:0022900;GO:0032324;GO:0034641;GO:0042126;GO:0042128;GO:0042558;GO:0042559;GO:0043545;GO:0044237;GO:0044249;GO:0044271;GO:0046483;GO:0051186;GO:0051188;GO:0051189;GO:0055114;GO:0071941	GO:0003824;GO:0005488;GO:0005506;GO:0008940;GO:0009055;GO:0016491;GO:0016661;GO:0030151;GO:0043167;GO:0043169;GO:0046872;GO:0046914;GO:0051536;GO:0051539;GO:0051540	GO:0009325;GO:0032991;GO:0042597;GO:0043234;GO:0044464	ko00910	91.012	0	93.105	28006000	4924600	49858332	27943000	6.1974	3.75136	0.751812	1.87364	-0.252512	0.00462707	0.000934919	3.79079	-0.750878	4.56363	-1.00432	1.91054	0.253447	Q9KLR4	>sp|Q9KLR4|NAPA_VIBCH Periplasmic nitrate reductase OS=Vibrio cholerae serotype O1 (strain ATCC 39315 / El Tor Inaba N16961) GN=napA PE=3 SV=1
7.43921	7.3073	7.38084	6.39489	7.09694	6.76883	7.80115	7.75837	7.62991	7.84712	7.75859	7.76606	+	+	+	+	+	+		alcohol metabolic process;alditol metabolic process;carbohydrate metabolic process;cellular carbohydrate metabolic process;cellular metabolic process;cellular process;glycerol metabolic process;glycerol-3-phosphate metabolic process;metabolic process;organophosphate metabolic process;phosphate-containing compound metabolic process;phosphorus metabolic process;polyol metabolic process;primary meta…	catalytic activity;glycerol-3-phosphate dehydrogenase activity;oxidoreductase activity;oxidoreductase activity, acting on CH-OH group of donors;oxidoreductase activity, acting on the CH-OH group of donors, quinone or similar compound as acceptor	cell part;cytoplasmic part;glycerol-3-phosphate dehydrogenase complex;intracellular part;macromolecular complex;protein complex	Glycerophospholipid metabolism	GO:0005975;GO:0006066;GO:0006071;GO:0006072;GO:0006793;GO:0006796;GO:0008152;GO:0009987;GO:0019400;GO:0019637;GO:0019751;GO:0044237;GO:0044238;GO:0044262;GO:0044281	GO:0003824;GO:0004368;GO:0016491;GO:0016614;GO:0016901	GO:0009331;GO:0032991;GO:0043234;GO:0044424;GO:0044444;GO:0044464	ko00564	161.39	0	57.692	23939334	6.95203e+06	54413668	62012668	3.32293	1.40504	0.62223	2.28093	-0.354026	3.0222	-0.414809	2.1451	-1.03704	2.02009	-0.976256	0.444569	-0.0607821	Q9KLT4	>tr|Q9KLT4|Q9KLT4_VIBCH Glycerol-3-phosphate dehydrogenase OS=Vibrio cholerae serotype O1 (strain ATCC 39315 / El Tor Inaba N16961) GN=VC_A0657 PE=3 SV=1
6.99329	7.02428	6.95745	7.31758	7.26809	7.19734	6.86104	6.86966	6.71104	6.77592	6.97748	6.9219	+	+	+		+	+										33.888	0	13.768	9829533	18356000	6603300	7.93927e+06	3.29963	2.60095	-0.269325	1.4961	0.177764	0.724322	0.0999142	2.21937	0.369239	2.7022	0.447089	0.419073	-0.07785	Q9KLU6	>tr|Q9KLU6|Q9KLU6_VIBCH Uncharacterized protein OS=Vibrio cholerae serotype O1 (strain ATCC 39315 / El Tor Inaba N16961) GN=VC_A0645 PE=4 SV=1
7.43561	7.41958	7.42338	7.43156	7.43659	7.47956	7.22768	7.1395	7.35207	7.1975	7.17995	7.25203	+		+	+	+	+		biological regulation;cell redox homeostasis;cellular homeostasis;cellular process;homeostatic process;regulation of biological process;regulation of biological quality;regulation of cellular process	binding;catalytic activity;coenzyme binding;cofactor binding;flavin adenine dinucleotide binding;NADH dehydrogenase activity;oxidoreductase activity;oxidoreductase activity, acting on NADH or NADPH	cell part;cytoplasm;intracellular part		GO:0009987;GO:0019725;GO:0042592;GO:0045454;GO:0050789;GO:0050794;GO:0065007;GO:0065008	GO:0003824;GO:0003954;GO:0005488;GO:0016491;GO:0016651;GO:0048037;GO:0050660;GO:0050662	GO:0005737;GO:0044424;GO:0044464		281.98	0	61.912	26683334	28169334	17724666	16252667	2.77659	0.652356	-0.0230505	1.40475	0.186436	3.20461	0.216359	3.07935	0.239409	1.52319	0.209487	0.173354	0.0299222	Q9KLU7	>tr|Q9KLU7|Q9KLU7_VIBCH NADH oxidase, putative OS=Vibrio cholerae serotype O1 (strain ATCC 39315 / El Tor Inaba N16961) GN=VC_A0644 PE=4 SV=1
7.37471	7.34702	7.34895	7.33752	7.39116	7.3723	7.17713	7.29237	7.27219	7.26359	7.16929	7.30557	+		+		+	+			binding;catalytic activity;coenzyme binding;cofactor binding;NAD binding;nucleotide binding;oxidoreductase activity;oxidoreductase activity, acting on CH-OH group of donors;oxidoreductase activity, acting on the CH-OH group of donors, NAD or NADP as acceptor		Glycine, serine and threonine metabolism;Methane metabolism		GO:0000166;GO:0003824;GO:0005488;GO:0016491;GO:0016614;GO:0016616;GO:0048037;GO:0050662;GO:0051287		ko00260;ko00680	90.398	0	35.317	22755000	23311000	17785334	17775000	1.62628	0.217602	-0.010104	1.39578	0.109663	1.25934	0.110743	1.30892	0.120847	1.43383	0.119767	0.00659976	0.00108035	Q9KLW1	>tr|Q9KLW1|Q9KLW1_VIBCH D-3-phosphoglycerate dehydrogenase-related protein OS=Vibrio cholerae serotype O1 (strain ATCC 39315 / El Tor Inaba N16961) GN=VC_A0630 PE=3 SV=1
7.55096	7.55725	7.4965	7.50122	7.55338	7.42779	7.73252	7.66535	7.64451	7.82617	7.90669	7.81558	+		+	+	+	+	+	cofactor transport;establishment of localization;heme transport;transport	receptor activity;transporter activity	cell outer membrane;cell part;external encapsulating structure part;membrane;outer membrane;plasma membrane		GO:0006810;GO:0015886;GO:0051181;GO:0051234	GO:0004872;GO:0005215	GO:0005886;GO:0009279;GO:0016020;GO:0019867;GO:0044462;GO:0044464		285.91	0	87.974	34336000	31416666	48132668	71027336	4.08474	0.421828	0.0407712	1.94726	-0.145887	3.089	-0.314577	2.80561	-0.355348	1.84256	-0.186658	1.90108	-0.16869	Q9KLW6	>tr|Q9KLW6|Q9KLW6_VIBCH TonB receptor-related protein OS=Vibrio cholerae serotype O1 (strain ATCC 39315 / El Tor Inaba N16961) GN=VC_A0625 PE=3 SV=1
9.23132	9.25423	9.19543	9.15195	9.29669	9.34098	9.08526	9.12652	9.12113	9.10537	9.00835	9.11988	+		+	+				alcohol catabolic process;alcohol metabolic process;carbohydrate catabolic process;carbohydrate metabolic process;catabolic process;cellular carbohydrate catabolic process;cellular carbohydrate metabolic process;cellular metabolic process;cellular nitrogen compound metabolic process;cellular process;coenzyme metabolic process;cofactor metabolic process;glucose catabolic process;glucose metabolic …	catalytic activity;sedoheptulose-7-phosphate:D-glyceraldehyde-3-phosphate glyceronetransferase activity;transferase activity;transferase activity, transferring aldehyde or ketonic groups	cell part;cytoplasm;intracellular part	Pentose phosphate pathway	GO:0005975;GO:0005996;GO:0006006;GO:0006007;GO:0006066;GO:0006098;GO:0006139;GO:0006732;GO:0006733;GO:0006739;GO:0006740;GO:0006753;GO:0006807;GO:0008152;GO:0009056;GO:0009117;GO:0009987;GO:0016052;GO:0019318;GO:0019320;GO:0019362;GO:0034641;GO:0044237;GO:0044238;GO:0044262;GO:0044275;GO:0044281;GO:0044282;GO:0046164;GO:0046365;GO:0046483;GO:0046496;GO:0051186;GO:0055086;GO:0055114;GO:0072524	GO:0003824;GO:0004801;GO:0016740;GO:0016744	GO:0005737;GO:0044424;GO:0044464	ko00030	323.31	0	34.635	1689133312	1863899904	1292266624	1203966720	1.80198	0.239442	-0.0362132	2.24653	0.116023	1.7288	0.149126	1.29722	0.185339	1.22199	0.152237	0.371278	0.0331024	Q9KLW8	>sp|Q9KLW8|TAL_VIBCH Transaldolase OS=Vibrio cholerae serotype O1 (strain ATCC 39315 / El Tor Inaba N16961) GN=tal PE=3 SV=1
6.90587	6.95063	6.90283	6.86301	6.81422	6.84077	6.69415	6.56171	6.56103	6.60068	6.75023	6.60382	+	+	+	+	+	+										5.7927	0	14.15	8324000	6.91497e+06	4.07643e+06	4543300	3.23616	1.73583	0.0804431	2.58832	0.314147	2.18235	0.268201	1.66562	0.187758	2.13501	0.233704	0.278746	-0.0459458	Q9KLX2	>tr|Q9KLX2|Q9KLX2_VIBCH Uncharacterized protein OS=Vibrio cholerae serotype O1 (strain ATCC 39315 / El Tor Inaba N16961) GN=VC_A0619 PE=4 SV=1
7.21521	7.21466	7.24329	7.37823	7.37014	7.43191	7.26207	7.2163	7.37943	7.19681	7.18831	7.23223	+	+			+			aromatic compound biosynthetic process;biosynthetic process;cellular aromatic compound metabolic process;cellular biosynthetic process;cellular metabolic process;cellular nitrogen compound biosynthetic process;cellular nitrogen compound metabolic process;cellular process;coenzyme biosynthetic process;coenzyme metabolic process;cofactor biosynthetic process;cofactor metabolic process;heterocycle b…	catalytic activity			GO:0006725;GO:0006732;GO:0006777;GO:0006807;GO:0008152;GO:0009058;GO:0009108;GO:0009987;GO:0018130;GO:0019438;GO:0019720;GO:0032324;GO:0034641;GO:0042558;GO:0042559;GO:0043545;GO:0044237;GO:0044249;GO:0044271;GO:0046483;GO:0051186;GO:0051188;GO:0051189	GO:0003824			109.19	0	47.34	16772333	24791666	19565334	16077000	2.2912	2.84466	-0.169043	0.550441	-0.0615476	0.493407	0.0186013	2.8686	0.187644	0.962392	0.107495	0.728063	0.0801489	Q9KLX4	>tr|Q9KLX4|Q9KLX4_VIBCH Molybdopterin biosynthesis MoeA protein OS=Vibrio cholerae serotype O1 (strain ATCC 39315 / El Tor Inaba N16961) GN=VC_A0617 PE=4 SV=1
7.64562	7.66792	7.66341	7.58178	7.60627	7.55379	7.47737	7.43884	7.36146	7.40875	7.42261	7.44018	+	+	+	+	+	+		amine biosynthetic process;amine metabolic process;aromatic compound biosynthetic process;aspartate family amino acid biosynthetic process;aspartate family amino acid metabolic process;biosynthetic process;carboxylic acid biosynthetic process;carboxylic acid metabolic process;cellular amine metabolic process;cellular amino acid biosynthetic process;cellular amino acid metabolic process;cellular a…	adenyl nucleotide binding;adenyl ribonucleotide binding;ATP binding;binding;catalytic activity;formate-tetrahydrofolate ligase activity;ligase activity;ligase activity, forming carbon-nitrogen bonds;nucleotide binding;purine nucleotide binding;purine ribonucleoside triphosphate binding;purine ribonucleotide binding;ribonucleotide binding		Carbon fixation pathways in prokaryotes;One carbon pool by folate	GO:0000096;GO:0000097;GO:0000105;GO:0006082;GO:0006139;GO:0006144;GO:0006520;GO:0006547;GO:0006555;GO:0006575;GO:0006725;GO:0006730;GO:0006732;GO:0006760;GO:0006766;GO:0006767;GO:0006790;GO:0006807;GO:0008152;GO:0008652;GO:0009058;GO:0009066;GO:0009067;GO:0009075;GO:0009076;GO:0009086;GO:0009108;GO:0009110;GO:0009112;GO:0009113;GO:0009308;GO:0009309;GO:0009396;GO:0009987;GO:0015939;GO:0015940;GO:…	GO:0000166;GO:0003824;GO:0004329;GO:0005488;GO:0005524;GO:0016874;GO:0016879;GO:0017076;GO:0030554;GO:0032553;GO:0032555;GO:0032559;GO:0035639		ko00670;ko00720	185.81	0	62.074	45613000	38119000	26824000	26548334	4.26745	2.03597	0.0783696	2.58976	0.233091	4.49215	0.235136	3.04869	0.156766	1.84516	0.154722	0.0192904	0.00204468	Q9KLX7	>sp|Q9KLX7|FTHS_VIBCH Formate--tetrahydrofolate ligase OS=Vibrio cholerae serotype O1 (strain ATCC 39315 / El Tor Inaba N16961) GN=fhs PE=3 SV=2
7.75148	7.74435	7.77709	7.71942	7.74348	7.7994	7.42951	7.34758	7.733	7.47163	7.45142	7.4546	+			+	+			biosynthetic process;cellular biosynthetic process;cellular lipid metabolic process;cellular metabolic process;cellular process;isoprenoid biosynthetic process;isoprenoid metabolic process;lipid biosynthetic process;lipid metabolic process;metabolic process;primary metabolic process	catalytic activity			GO:0006629;GO:0006720;GO:0008152;GO:0008299;GO:0008610;GO:0009058;GO:0009987;GO:0044237;GO:0044238;GO:0044249;GO:0044255	GO:0003824			24.947	0	22.842	57262332	56938668	34407668	28794334	1.90934	0.0471582	0.00353893	1.01438	0.254277	4.84457	0.298424	3.56296	0.294885	0.982711	0.250738	0.139083	0.0441475	Q9KLY1	>tr|Q9KLY1|Q9KLY1_VIBCH Glyoxalase OS=Vibrio cholerae serotype O1 (strain ATCC 39315 / El Tor Inaba N16961) GN=VC_A0610 PE=3 SV=1
7.37142	7.44585	7.60176	7.5446	7.42844	7.47213	7.25739	7.16714	7.40188	7.2039	7.34573	7.26064	+				+			biological regulation;regulation of biological process;regulation of biosynthetic process;regulation of cellular biosynthetic process;regulation of cellular macromolecule biosynthetic process;regulation of cellular metabolic process;regulation of cellular process;regulation of gene expression;regulation of macromolecule biosynthetic process;regulation of macromolecule metabolic process;regulation…	binding;catalytic activity;DNA binding;kinase activity;nucleic acid binding;transferase activity;transferase activity, transferring phosphorus-containing groups			GO:0006355;GO:0009118;GO:0009889;GO:0010468;GO:0010556;GO:0019219;GO:0019222;GO:0031323;GO:0031326;GO:0032784;GO:0050789;GO:0050794;GO:0051171;GO:0051252;GO:0060255;GO:0065007;GO:0080090;GO:2000112	GO:0003676;GO:0003677;GO:0003824;GO:0005488;GO:0016301;GO:0016740;GO:0016772			97.52	0	14.939	30469000	30506334	19336666	18794666	1.42809	0.0390215	-0.00871436	0.960154	0.197538	1.20118	0.202919	1.78044	0.211633	1.26833	0.206253	0.0225055	0.00538015	Q9KLY4	>tr|Q9KLY4|Q9KLY4_VIBCH Regulator of nucleoside diphosphate kinase OS=Vibrio cholerae serotype O1 (strain ATCC 39315 / El Tor Inaba N16961) GN=VC_A0607 PE=4 SV=1
7.28832	7.20674	7.25936	7.36797	7.38783	7.3205	7.00497	7.03775	7.21646	7.05915	7.05389	7.05146	+	+		+	+	+										64.628	0	35.344	17896666	22891666	12494667	11346000	2.96257	1.58285	-0.107296	1.11026	0.165083	2.91884	0.196641	3.95246	0.303937	1.77987	0.272379	0.182864	0.031558	Q9KLZ6	>tr|Q9KLZ6|Q9KLZ6_VIBCH Uncharacterized protein OS=Vibrio cholerae serotype O1 (strain ATCC 39315 / El Tor Inaba N16961) GN=VC_A0593 PE=4 SV=1
7.53967	7.57788	7.6196	7.67235	7.69021	7.65454	7.49679	7.43083	7.42005	7.34496	7.33584	7.33357	+	+	+	+	+	+	+	cellular macromolecule metabolic process;cellular metabolic process;cellular nitrogen compound metabolic process;cellular process;cellular response to stimulus;cellular response to stress;DNA metabolic process;DNA repair;macromolecule metabolic process;metabolic process;nitrogen compound metabolic process;nucleic acid metabolic process;nucleobase-containing compound metabolic process;primary meta…	catalytic activity;hydrolase activity			GO:0006139;GO:0006259;GO:0006281;GO:0006807;GO:0006950;GO:0006974;GO:0008152;GO:0009987;GO:0033554;GO:0034641;GO:0043170;GO:0044237;GO:0044238;GO:0044260;GO:0050896;GO:0051716;GO:0090304	GO:0003824;GO:0016787			205.04	0	21.642	38043332	47055668	28221000	21784666	5.35645	1.6781	-0.0933169	1.75591	0.129824	3.30334	0.240928	5.17623	0.334245	2.98808	0.223141	1.99346	0.111104	Q9KLZ7	>tr|Q9KLZ7|Q9KLZ7_VIBCH MutT/nudix family protein OS=Vibrio cholerae serotype O1 (strain ATCC 39315 / El Tor Inaba N16961) GN=VC_A0592 PE=4 SV=1
9.3126	9.37927	9.35647	9.42622	9.39326	9.40773	9.21648	9.25904	9.24082	9.38728	9.42706	9.3742	+		+			+	+		cofactor transporter activity;heme transporter activity;receptor activity;transporter activity	cell outer membrane;cell part;external encapsulating structure part;membrane;outer membrane;plasma membrane			GO:0004872;GO:0005215;GO:0015232;GO:0051184	GO:0005886;GO:0009279;GO:0016020;GO:0019867;GO:0044462;GO:0044464		323.31	0	77.882	2240366592	2566133248	1734333312	2493266688	3.82726	1.28457	-0.0596244	2.0585	0.110662	0.862206	-0.0467367	0.279669	0.0128876	3.39934	0.170286	2.84147	-0.157399	Q9KM13	>tr|Q9KM13|Q9KM13_VIBCH Heme transport protein HutA OS=Vibrio cholerae serotype O1 (strain ATCC 39315 / El Tor Inaba N16961) GN=VC_A0576 PE=3 SV=1
7.50412	7.61287	7.56119	7.46115	7.58286	7.55402	7.68947	7.68993	7.60426	7.74195	7.82267	7.77425	+			+	+		+									82.627	0	21.316	36446332	34332668	46030332	60380668	2.78382	0.214826	0.0267143	1.12952	-0.101829	2.30687	-0.220234	2.32066	-0.246948	1.29648	-0.128543	1.48659	-0.118405	Q9KM16	>tr|Q9KM16|Q9KM16_VIBCH DamX-related protein OS=Vibrio cholerae serotype O1 (strain ATCC 39315 / El Tor Inaba N16961) GN=VC_A0573 PE=4 SV=1
7.27063	7.33137	7.29272	7.43484	7.39449	7.25188	6.96152	6.9108	6.94017	6.97893	6.96141	7.00651	+		+	+	+	+										124.49	0	14.411	19905334	23293000	8669533	9609033	4.77141	0.460751	-0.0621629	4.01183	0.360741	3.85873	0.315958	2.57116	0.378121	2.74237	0.422903	1.06779	-0.044782	Q9KM18	>tr|Q9KM18|Q9KM18_VIBCH Uncharacterized protein OS=Vibrio cholerae serotype O1 (strain ATCC 39315 / El Tor Inaba N16961) GN=VC_A0571 PE=4 SV=1
7.69553	7.7453	7.6254	7.75545	7.75135	7.67757	7.294	7.35868	7.25358	7.40093	7.43053	7.44826	+		+	+	+	+	+									116.2	0	42.175	49147668	53649668	20149334	26730666	5.01136	0.385418	-0.0393788	2.94818	0.386657	2.6606	0.26217	3.32629	0.301549	3.36869	0.426036	1.68411	-0.124487	Q9KM21	>tr|Q9KM21|Q9KM21_VIBCH Uncharacterized protein OS=Vibrio cholerae serotype O1 (strain ATCC 39315 / El Tor Inaba N16961) GN=VC_A0568 PE=4 SV=1
6.59347	6.4831	6.49989	6.50144	NaN	6.72746	6.85995	6.73541	6.69941	7.08625	7.10435	7.02772	+		+	+	+		+		binding;catalytic activity;cation transmembrane transporter activity;coenzyme binding;cofactor binding;hydrogen ion transmembrane transporter activity;inorganic cation transmembrane transporter activity;ion transmembrane transporter activity;monovalent inorganic cation transmembrane transporter activity;NAD(P)+ transhydrogenase (AB-specific) activity;NAD(P)+ transhydrogenase (B-specific) activity…	cell part;integral to membrane;intrinsic to membrane;membrane;membrane part;plasma membrane	Nicotinate and nicotinamide metabolism		GO:0000166;GO:0003824;GO:0003957;GO:0005215;GO:0005488;GO:0008324;GO:0008746;GO:0008750;GO:0015075;GO:0015077;GO:0015078;GO:0016491;GO:0016651;GO:0016652;GO:0022857;GO:0022890;GO:0022891;GO:0022892;GO:0048037;GO:0050661;GO:0050662	GO:0005886;GO:0016020;GO:0016021;GO:0031224;GO:0044425;GO:0044464	ko00760	50.417	0	48.551	3.37493e+06	2.83727e+06	5.89543e+06	11857333	3.29534	0.377864	-0.0889614	1.80017	-0.239435	3.72317	-0.547283	1.84298	-0.458322	0.606445	-0.150473	2.33406	-0.307849	Q9KM25	>tr|Q9KM25|Q9KM25_VIBCH NAD(P) transhydrogenase subunit beta OS=Vibrio cholerae serotype O1 (strain ATCC 39315 / El Tor Inaba N16961) GN=VC_A0564 PE=3 SV=1
7.97262	7.93217	7.98234	7.89338	7.79844	7.92418	8.16935	8.17386	8.0496	8.33313	8.29745	8.2404	+		+	+	+	+	+		binding;catalytic activity;cation transmembrane transporter activity;hydrogen ion transmembrane transporter activity;inorganic cation transmembrane transporter activity;ion transmembrane transporter activity;monovalent inorganic cation transmembrane transporter activity;NAD(P)+ transhydrogenase (AB-specific) activity;NAD(P)+ transhydrogenase (B-specific) activity;NAD(P)+ transhydrogenase activity…		Nicotinate and nicotinamide metabolism		GO:0000166;GO:0003824;GO:0003957;GO:0005215;GO:0005488;GO:0008324;GO:0008746;GO:0008750;GO:0015075;GO:0015077;GO:0015078;GO:0016491;GO:0016651;GO:0016652;GO:0022857;GO:0022890;GO:0022891;GO:0022892		ko00760	143.65	0	53.965	91815336	75027000	136340000	195880000	4.16835	1.0395	0.0903783	1.74702	-0.16856	3.34137	-0.327949	3.07359	-0.418327	2.01833	-0.258938	1.50914	-0.159389	Q9KM26	>tr|Q9KM26|Q9KM26_VIBCH NAD(P) transhydrogenase subunit alpha OS=Vibrio cholerae serotype O1 (strain ATCC 39315 / El Tor Inaba N16961) GN=VC_A0563 PE=3 SV=1
7.42264	7.43546	7.38093	7.35015	7.45877	7.55227	7.03957	7.14631	6.99554	6.95615	7.02995	7.085	+		+	+	+	+		amine biosynthetic process;amine metabolic process;biosynthetic process;carboxylic acid biosynthetic process;carboxylic acid metabolic process;cellular amine metabolic process;cellular amino acid biosynthetic process;cellular amino acid metabolic process;cellular biosynthetic process;cellular ketone metabolic process;cellular metabolic process;cellular modified amino acid biosynthetic process;cel…	catalytic activity;gamma-glutamyltransferase activity;transferase activity;transferase activity, transferring acyl groups;transferase activity, transferring amino-acyl groups		Arachidonic acid metabolism;Cyanoamino acid metabolism;Glutathione metabolism;Taurine and hypotaurine metabolism	GO:0006082;GO:0006518;GO:0006520;GO:0006575;GO:0006749;GO:0006750;GO:0006790;GO:0006807;GO:0008152;GO:0008652;GO:0009058;GO:0009308;GO:0009309;GO:0009987;GO:0016053;GO:0019752;GO:0034641;GO:0042180;GO:0042398;GO:0043043;GO:0043436;GO:0044106;GO:0044237;GO:0044238;GO:0044249;GO:0044271;GO:0044272;GO:0044281;GO:0044283;GO:0046394	GO:0003824;GO:0003840;GO:0016740;GO:0016746;GO:0016755		ko00430;ko00460;ko00480;ko00590	89.782	0	56.361	25919666	28940334	11619300	10638533	3.92922	0.268471	-0.0407187	2.74809	0.352535	3.17168	0.38931	2.46434	0.430029	2.22861	0.393254	0.250016	0.0367748	Q9KM31	>tr|Q9KM31|Q9KM31_VIBCH Gamma-glutamyltranspeptidase, putative OS=Vibrio cholerae serotype O1 (strain ATCC 39315 / El Tor Inaba N16961) GN=VC_A0558 PE=4 SV=1
8.46464	8.43634	8.4544	8.54042	8.52333	8.64965	8.32873	8.36429	8.56398	8.33248	8.25696	8.37044	+	+		+	+			biosynthetic process;metabolic process	binding;catalytic activity;cofactor binding;pyridoxal phosphate binding;transaminase activity;transferase activity;transferase activity, transferring acyl groups;transferase activity, transferring nitrogenous groups;vitamin B6 binding;vitamin binding		Vibrio cholerae pathogenic cycle	GO:0008152;GO:0009058	GO:0003824;GO:0005488;GO:0008483;GO:0016740;GO:0016746;GO:0016769;GO:0019842;GO:0030170;GO:0048037;GO:0070279		ko05111	323.31	0	43.593	283106688	375690016	270316672	210126672	1.57676	1.37805	-0.119338	0.167958	0.0327953	1.73249	0.131834	2.08004	0.251172	0.8491	0.152133	0.544016	0.0990391	Q9KM65	>sp|Q9KM65|CQSA_VIBCH CAI-1 autoinducer synthase OS=Vibrio cholerae serotype O1 (strain ATCC 39315 / El Tor Inaba N16961) GN=cqsA PE=1 SV=1
7.09377	7.07882	7.15391	7.1645	7.19687	7.14903	7.13748	7.20938	7.23363	7.31078	7.32738	7.29283	+			+	+		+									38.445	0	25.304	12884333	14811333	15681333	20443666	3.11908	1.06999	-0.0613017	1.07923	-0.084665	2.88908	-0.201497	2.90275	-0.140196	0.294687	-0.0233633	1.72819	-0.116832	Q9KM74	>tr|Q9KM74|Q9KM74_VIBCH Uncharacterized protein OS=Vibrio cholerae serotype O1 (strain ATCC 39315 / El Tor Inaba N16961) GN=VC_A0514 PE=4 SV=1
8.36588	8.39608	8.34492	8.45255	8.44832	8.40805	8.55972	8.61696	8.57148	8.50255	8.53728	8.53372	+	+	+	+	+	+	+	amine biosynthetic process;amine metabolic process;biosynthetic process;carboxylic acid biosynthetic process;carboxylic acid metabolic process;cellular amine metabolic process;cellular amino acid biosynthetic process;cellular amino acid metabolic process;cellular biosynthetic process;cellular ketone metabolic process;cellular metabolic process;cellular nitrogen compound biosynthetic process;cellu…	binding;catalytic activity;cofactor binding;pyridoxal phosphate binding;transaminase activity;transferase activity;transferase activity, transferring nitrogenous groups;vitamin B6 binding;vitamin binding			GO:0006082;GO:0006520;GO:0006807;GO:0008152;GO:0008652;GO:0009058;GO:0009308;GO:0009309;GO:0009987;GO:0016053;GO:0019752;GO:0034641;GO:0042180;GO:0043436;GO:0044106;GO:0044237;GO:0044238;GO:0044249;GO:0044271;GO:0044281;GO:0044283;GO:0046394	GO:0003824;GO:0005488;GO:0008483;GO:0016740;GO:0016769;GO:0019842;GO:0030170;GO:0048037;GO:0070279			323.31	0	45.081	234136672	273380000	383200000	334806656	4.51861	1.51582	-0.0673485	3.13361	-0.213757	2.9609	-0.155556	2.09759	-0.0882076	2.54166	-0.146408	1.31975	0.0582005	Q9KM75	>tr|Q9KM75|Q9KM75_VIBCH Amino acid biosynthesis aminotransferase OS=Vibrio cholerae serotype O1 (strain ATCC 39315 / El Tor Inaba N16961) GN=VC_A0513 PE=4 SV=1
7.89296	7.89315	7.84973	7.77433	7.75667	7.70997	8.14073	8.18969	7.97477	8.16423	8.1469	8.10479	+	+	+	+	+	+			catalytic activity				GO:0003824			323.31	0	110.04	75698664	55953668	129132000	137833328	3.81316	2.26729	0.131625	1.54378	-0.223115	3.47187	-0.26003	3.94095	-0.391655	2.19536	-0.35474	0.212578	-0.0369158	Q9KM78	>tr|Q9KM78|Q9KM78_VIBCH Uncharacterized protein OS=Vibrio cholerae serotype O1 (strain ATCC 39315 / El Tor Inaba N16961) GN=VC_A0510 PE=4 SV=1
7.01712	7.08408	6.95446	6.87485	6.92305	6.96089	7.13532	7.21253	7.17143	7.12525	7.04661	7.06618	+		+		+	+	+	catabolic process;lipid catabolic process;lipid metabolic process;metabolic process;primary metabolic process	catalytic activity;hydrolase activity;hydrolase activity, acting on ester bonds;lipase activity			GO:0006629;GO:0008152;GO:0009056;GO:0016042;GO:0044238	GO:0003824;GO:0016298;GO:0016787;GO:0016788			94.68	0	37.748	10514200	8.33713e+06	14936333	12040667	2.89528	1.03391	0.0989559	1.62245	-0.154545	0.617002	-0.0607953	2.01604	-0.159751	2.79015	-0.253501	1.34869	0.0937495	Q9KM91	>tr|Q9KM91|Q9KM91_VIBCH Lipase, GDXG family OS=Vibrio cholerae serotype O1 (strain ATCC 39315 / El Tor Inaba N16961) GN=VC_A0490 PE=4 SV=1
6.71544	6.65431	6.61694	6.76061	6.66661	6.78816	6.80818	6.85709	6.95837	6.6474	6.68762	6.57231	+		+				+									15.243	0	22.038	4.61467e+06	5.51447e+06	7.57053e+06	4348800	2.17256	0.750305	-0.0762335	1.80204	-0.212321	0.23438	0.0264495	0.962538	0.102683	1.11239	-0.136088	1.89466	0.238771	Q9KMB8	>tr|Q9KMB8|Q9KMB8_VIBCH Uncharacterized protein OS=Vibrio cholerae serotype O1 (strain ATCC 39315 / El Tor Inaba N16961) GN=VC_A0455 PE=4 SV=1
8.12074	8.14183	8.11807	8.15351	8.15226	8.09054	7.47802	7.52358	7.3799	7.34711	7.40125	7.39368	+		+	+	+	+		bacteriocin immunity;cellular metabolic process;cellular process;metabolic process;secondary metabolic process;toxin metabolic process				GO:0008152;GO:0009404;GO:0009987;GO:0019748;GO:0030153;GO:0044237				153.41	0	37.273	133970000	135856672	29144000	24062000	7.59887	0.0837105	-0.00522614	3.99279	0.666377	5.64473	0.746196	5.0163	0.751422	3.84829	0.671603	0.808988	0.079819	Q9KMC5	>tr|Q9KMC5|Q9KMC5_VIBCH Microcin immunity protein MccF OS=Vibrio cholerae serotype O1 (strain ATCC 39315 / El Tor Inaba N16961) GN=VC_A0439 PE=4 SV=1
7.31631	7.16959	7.25052	7.2584	7.32085	7.27089	7.68527	7.68165	7.65697	7.59491	7.54165	7.57654	+		+	+	+	+	+									183.11	0	24.032	17765666	19241000	47294332	37290000	5.40663	0.33641	-0.0379095	3.2333	-0.429158	2.70522	-0.325564	3.51052	-0.287655	4.30698	-0.391249	2.3473	0.103594	Q9KMJ8	>tr|Q9KMJ8|Q9KMJ8_VIBCH Uncharacterized protein OS=Vibrio cholerae serotype O1 (strain ATCC 39315 / El Tor Inaba N16961) GN=VC_A0345 PE=4 SV=1
8.03791	8.03185	7.99834	7.92312	7.99892	8.02955	7.80489	7.7503	7.71299	7.72344	7.67858	7.73213	+		+	+	+	+		cellular metabolic process;cellular nitrogen compound metabolic process;cellular process;GTP metabolic process;heterocycle metabolic process;metabolic process;nitrogen compound metabolic process;nucleobase-containing compound metabolic process;nucleobase-containing small molecule metabolic process;nucleoside phosphate metabolic process;nucleoside triphosphate metabolic process;nucleotide metaboli…	binding;catalytic activity;cation binding;dGTPase activity;hydrolase activity;hydrolase activity, acting on ester bonds;ion binding;magnesium ion binding;metal ion binding;phosphoric diester hydrolase activity;phosphoric ester hydrolase activity;triphosphoric monoester hydrolase activity			GO:0006139;GO:0006163;GO:0006753;GO:0006807;GO:0008152;GO:0009117;GO:0009141;GO:0009144;GO:0009150;GO:0009199;GO:0009205;GO:0009259;GO:0009987;GO:0034641;GO:0044237;GO:0044238;GO:0044281;GO:0046039;GO:0046483;GO:0055086;GO:0072521	GO:0000287;GO:0003824;GO:0005488;GO:0008081;GO:0008832;GO:0016787;GO:0016788;GO:0016793;GO:0042578;GO:0043167;GO:0043169;GO:0046872			190.14	0	45.908	105449336	96856000	57241000	51524000	4.67704	0.499835	0.0388362	3.08736	0.26664	3.94709	0.311315	2.79977	0.272479	2.27472	0.227804	0.641762	0.0446752	Q9KMM3	>sp|Q9KMM3|DGT1B_VIBCH Deoxyguanosinetriphosphate triphosphohydrolase-like protein 2 OS=Vibrio cholerae serotype O1 (strain ATCC 39315 / El Tor Inaba N16961) GN=VC_A0308 PE=3 SV=1
8.79657	8.84593	8.83104	8.76224	8.81454	8.74828	8.81238	8.86739	8.78357	8.89236	8.85258	8.88249	+				+			amine biosynthetic process;amine metabolic process;biosynthetic process;carboxylic acid biosynthetic process;carboxylic acid metabolic process;cellular amine metabolic process;cellular amino acid biosynthetic process;cellular amino acid metabolic process;cellular aromatic compound metabolic process;cellular biosynthetic process;cellular ketone metabolic process;cellular metabolic process;cellular…	binding;catalytic activity;cofactor binding;glycine hydroxymethyltransferase activity;hydroxymethyl-, formyl- and related transferase activity;pyridoxal phosphate binding;transferase activity;transferase activity, transferring one-carbon groups;vitamin B6 binding;vitamin binding	cell part;cytoplasm;intracellular part	Cyanoamino acid metabolism;Glycine, serine and threonine metabolism;Methane metabolism;One carbon pool by folate	GO:0006082;GO:0006520;GO:0006544;GO:0006545;GO:0006563;GO:0006725;GO:0006730;GO:0006732;GO:0006760;GO:0006807;GO:0008152;GO:0008652;GO:0009058;GO:0009069;GO:0009070;GO:0009308;GO:0009309;GO:0009987;GO:0016053;GO:0019264;GO:0019752;GO:0034641;GO:0035999;GO:0042180;GO:0042558;GO:0043436;GO:0044106;GO:0044237;GO:0044238;GO:0044249;GO:0044271;GO:0044281;GO:0044283;GO:0046394;GO:0046483;GO:0046653;GO:…	GO:0003824;GO:0004372;GO:0005488;GO:0016740;GO:0016741;GO:0016742;GO:0019842;GO:0030170;GO:0048037;GO:0070279	GO:0005737;GO:0044424;GO:0044464	ko00260;ko00460;ko00670;ko00680	323.31	0	46.91	668346688	596990016	664529984	751860032	1.50665	0.928676	0.0494938	0.0404606	0.00340271	1.27409	-0.0512969	1.8977	-0.100791	0.655972	-0.0460911	0.935457	-0.0546996	Q9KMP4	>sp|Q9KMP4|GLYA2_VIBCH Serine hydroxymethyltransferase 2 OS=Vibrio cholerae serotype O1 (strain ATCC 39315 / El Tor Inaba N16961) GN=glyA2 PE=3 SV=1
8.03675	8.01102	7.94215	8.02098	7.9883	8.00689	7.93381	7.99593	8.00762	7.92822	7.86845	7.88361	+			+	+		+	acetyl-CoA biosynthetic process;acetyl-CoA metabolic process;biosynthetic process;cellular biosynthetic process;cellular metabolic process;cellular process;coenzyme biosynthetic process;coenzyme metabolic process;cofactor biosynthetic process;cofactor metabolic process;energy derivation by oxidation of organic compounds;fermentation;generation of precursor metabolites and energy;metabolic process…	acetate kinase activity;adenyl nucleotide binding;adenyl ribonucleotide binding;ATP binding;binding;catalytic activity;cation binding;ion binding;kinase activity;magnesium ion binding;metal ion binding;nucleotide binding;phosphotransferase activity, carboxyl group as acceptor;purine nucleotide binding;purine ribonucleoside triphosphate binding;purine ribonucleotide binding;ribonucleotide binding;…	cell part;cytoplasm;intracellular part	Carbon fixation pathways in prokaryotes;Methane metabolism;Propanoate metabolism;Pyruvate metabolism;Taurine and hypotaurine metabolism	GO:0006082;GO:0006084;GO:0006085;GO:0006091;GO:0006113;GO:0006732;GO:0008152;GO:0009058;GO:0009108;GO:0009987;GO:0015980;GO:0044237;GO:0044249;GO:0044281;GO:0051186;GO:0051188;GO:0055114	GO:0000166;GO:0000287;GO:0003824;GO:0005488;GO:0005524;GO:0008776;GO:0016301;GO:0016740;GO:0016772;GO:0016774;GO:0017076;GO:0030554;GO:0032553;GO:0032555;GO:0032559;GO:0035639;GO:0043167;GO:0043169;GO:0046872	GO:0005737;GO:0044424;GO:0044464	ko00430;ko00620;ko00640;ko00680;ko00720	263.26	0	42.826	99643000	101297000	95567000	78374336	1.73285	0.105951	-0.00875044	0.183701	0.0175207	1.43479	0.103215	2.27911	0.111965	0.457262	0.0262712	1.37503	0.0856942	Q9KMT5	>sp|Q9KMT5|ACKA2_VIBCH Acetate kinase 2 OS=Vibrio cholerae serotype O1 (strain ATCC 39315 / El Tor Inaba N16961) GN=ackA2 PE=3 SV=1
9.3848	9.3959	9.36644	9.4014	9.38225	9.39415	9.29292	9.31095	9.32523	9.2466	9.27616	9.28758	+		+	+	+	+			active transmembrane transporter activity;ATPase activity;ATPase activity, coupled;ATPase activity, coupled to movement of substances;ATPase activity, coupled to transmembrane movement of substances;catalytic activity;cation transmembrane transporter activity;hydrolase activity;hydrolase activity, acting on acid anhydrides;hydrolase activity, acting on acid anhydrides, catalyzing transmembrane mo…		ABC transporters		GO:0003824;GO:0005215;GO:0005381;GO:0008324;GO:0015075;GO:0015343;GO:0015399;GO:0015405;GO:0016462;GO:0016787;GO:0016817;GO:0016818;GO:0016820;GO:0016887;GO:0017111;GO:0022804;GO:0022857;GO:0022890;GO:0022891;GO:0022892;GO:0042623;GO:0042626;GO:0042927;GO:0043492;GO:0046873;GO:0046915		ko02010	323.31	0	37.142	2412966656	2469866752	2041266688	1864033408	4.45474	0.42606	-0.0102202	2.33655	0.0726827	2.77624	0.112269	3.09645	0.122489	2.79679	0.0829029	1.20971	0.0395864	Q9KMU2	>tr|Q9KMU2|Q9KMU2_VIBCH Iron(III) ABC transporter, periplasmic iron-compound-binding protein OS=Vibrio cholerae serotype O1 (strain ATCC 39315 / El Tor Inaba N16961) GN=VC_A0227 PE=1 SV=1
6.51599	6.36575	6.45885	6.43294	6.47711	6.3575	6.58183	6.6365	6.63473	6.44417	6.68381	6.54963	+		+			+										11.228	0	11.516	2.82623e+06	2.66247e+06	4153500	3.71813e+06	1.31805	0.163592	0.0243506	1.64682	-0.17082	0.615106	-0.112339	0.814974	-0.13669	2.11676	-0.19517	0.337179	0.0584806	Q9KMU5	>tr|Q9KMU5|Q9KMU5_VIBCH Uncharacterized protein OS=Vibrio cholerae serotype O1 (strain ATCC 39315 / El Tor Inaba N16961) GN=VC_A0224 PE=4 SV=1
8.54886	8.59244	8.51255	8.55206	8.58341	8.6102	8.7039	8.70367	8.74482	8.75053	8.74287	8.72598	+		+	+	+	+		macromolecule metabolic process;metabolic process;primary metabolic process;protein metabolic process;proteolysis	catalytic activity;hydrolase activity;metallopeptidase activity;peptidase activity;peptidase activity, acting on L-amino acid peptides			GO:0006508;GO:0008152;GO:0019538;GO:0043170;GO:0044238	GO:0003824;GO:0008233;GO:0008237;GO:0016787;GO:0070011			323.31	0	101.88	356873344	382420000	522273344	549433344	4.17891	0.463187	-0.0306082	2.46096	-0.166179	2.83372	-0.188511	3.00348	-0.157902	2.47804	-0.135571	0.652394	-0.0223316	Q9KMU6	>sp|Q9KMU6|PRTV_VIBCH Pre-pro-metalloprotease PrtV OS=Vibrio cholerae serotype O1 (strain ATCC 39315 / El Tor Inaba N16961) GN=prtV PE=1 SV=1
7.1543	7.28044	7.31323	7.17557	7.10274	7.19904	7.01229	7.07904	6.97488	6.99099	6.98402	6.97252	+		+	+	+	+		biosynthetic process;cellular biosynthetic process;cellular metabolic process;cellular nitrogen compound biosynthetic process;cellular nitrogen compound metabolic process;cellular process;coenzyme biosynthetic process;coenzyme metabolic process;cofactor biosynthetic process;cofactor metabolic process;heterocycle biosynthetic process;heterocycle metabolic process;metabolic process;NAD biosynthetic…	acid-ammonia (or amide) ligase activity;adenyl nucleotide binding;adenyl ribonucleotide binding;ATP binding;binding;carbon-nitrogen ligase activity, with glutamine as amido-N-donor;catalytic activity;ligase activity;ligase activity, forming carbon-nitrogen bonds;NAD+ synthase (glutamine-hydrolyzing) activity;NAD+ synthase activity;nucleotide binding;purine nucleotide binding;purine ribonucleoside…		Nicotinate and nicotinamide metabolism;Nitrogen metabolism	GO:0006139;GO:0006732;GO:0006733;GO:0006734;GO:0006753;GO:0006807;GO:0008152;GO:0009058;GO:0009108;GO:0009117;GO:0009165;GO:0009435;GO:0009987;GO:0018130;GO:0019359;GO:0019362;GO:0019363;GO:0019674;GO:0034641;GO:0034654;GO:0044237;GO:0044238;GO:0044249;GO:0044271;GO:0044281;GO:0046483;GO:0046496;GO:0051186;GO:0051188;GO:0055086;GO:0072524;GO:0072525	GO:0000166;GO:0003824;GO:0003952;GO:0005488;GO:0005524;GO:0008795;GO:0016874;GO:0016879;GO:0016880;GO:0016884;GO:0017076;GO:0030554;GO:0032553;GO:0032555;GO:0032559;GO:0035639		ko00760;ko00910	18.601	0	30.402	17970000	14488333	10573700	9606767	2.89038	0.732057	0.0902081	1.78192	0.227256	2.26595	0.266815	2.40808	0.176607	1.50711	0.137048	0.56847	0.039559	Q9KMW1	>sp|Q9KMW1|NADE_VIBCH NH(3)-dependent NAD(+) synthetase OS=Vibrio cholerae serotype O1 (strain ATCC 39315 / El Tor Inaba N16961) GN=nadE PE=1 SV=1
7.85039	7.7791	7.83062	7.84247	7.81792	7.87722	7.20994	7.15461	7.38548	6.94261	6.96641	7.13296	+		+	+	+	+										323.31	0	42.042	66231332	70235000	18261666	10533300	5.48282	0.39987	-0.0258336	2.84349	0.570026	3.65292	0.806041	3.74014	0.831874	2.94141	0.595859	1.20809	0.236015	Q9KMW6	>tr|Q9KMW6|Q9KMW6_VIBCH Uncharacterized protein OS=Vibrio cholerae serotype O1 (strain ATCC 39315 / El Tor Inaba N16961) GN=VC_A0200 PE=4 SV=1
7.36819	7.43588	7.39679	7.49596	7.44677	7.41835	7.22907	7.28773	7.17461	7.27156	7.29095	7.2652	+		+	+	+	+										151.36	0	74.257	25187000	28502666	17097334	18881666	3.45816	0.825578	-0.0534064	1.95132	0.169816	2.38363	0.124386	2.75467	0.177792	2.30574	0.223223	0.606659	-0.0454305	Q9KMW7	>tr|Q9KMW7|Q9KMW7_VIBCH Uncharacterized protein OS=Vibrio cholerae serotype O1 (strain ATCC 39315 / El Tor Inaba N16961) GN=VC_A0199 PE=4 SV=1
6.93544	6.8813	7.0271	6.98361	7.10558	7.1086	6.76392	6.76629	6.63376	6.68454	6.65562	6.58832	+		+	+	+	+		cellular metabolic process;cellular nitrogen compound metabolic process;cellular process;heterocycle metabolic process;metabolic process;nitrogen compound metabolic process;nucleobase-containing compound metabolic process;nucleobase-containing small molecule interconversion;nucleobase-containing small molecule metabolic process;nucleoside phosphate metabolic process;nucleotide metabolic process;p…	binding;catalytic activity;cation binding;GMP reductase activity;ion binding;metal ion binding;oxidoreductase activity;oxidoreductase activity, acting on NADH or NADPH;oxidoreductase activity, acting on NADH or NADPH, nitrogenous group as acceptor		Purine metabolism	GO:0006139;GO:0006163;GO:0006753;GO:0006807;GO:0008152;GO:0009117;GO:0009987;GO:0015949;GO:0034641;GO:0044237;GO:0044238;GO:0044281;GO:0046483;GO:0055086;GO:0072521	GO:0003824;GO:0003920;GO:0005488;GO:0016491;GO:0016651;GO:0016657;GO:0043167;GO:0043169;GO:0046872		ko00230	91.579	0	37.114	8957033	11740867	5.31597e+06	4.41233e+06	3.67241	0.931457	-0.117982	1.68559	0.226621	2.39954	0.305122	2.96868	0.423103	2.33888	0.344603	0.6832	0.0785006	Q9KMW9	>sp|Q9KMW9|GUAC_VIBCH GMP reductase OS=Vibrio cholerae serotype O1 (strain ATCC 39315 / El Tor Inaba N16961) GN=guaC PE=3 SV=1
8.3909	8.35417	8.37322	8.38365	8.35017	8.37258	8.31395	8.32519	8.40085	8.26813	8.21253	8.27969	+			+	+			cellular metabolic process;cellular process;energy derivation by oxidation of organic compounds;fermentation;generation of precursor metabolites and energy;metabolic process;oxidation-reduction process	binding;catalytic activity;coenzyme binding;cofactor binding;D-lactate dehydrogenase activity;lactate dehydrogenase activity;NAD binding;nucleotide binding;oxidoreductase activity;oxidoreductase activity, acting on CH-OH group of donors;oxidoreductase activity, acting on the CH-OH group of donors, NAD or NADP as acceptor		Pyruvate metabolism	GO:0006091;GO:0006113;GO:0008152;GO:0009987;GO:0015980;GO:0044237;GO:0055114	GO:0000166;GO:0003824;GO:0004457;GO:0005488;GO:0008720;GO:0016491;GO:0016614;GO:0016616;GO:0048037;GO:0050662;GO:0051287		ko00620	245.67	0	36.793	236060000	233896672	223053328	179650000	2.21866	0.0980783	0.00396188	0.37365	0.0261011	2.16319	0.119311	2.13349	0.115349	0.311679	0.0221392	1.27586	0.0932099	Q9KMX4	>tr|Q9KMX4|Q9KMX4_VIBCH D-lactate dehydrogenase OS=Vibrio cholerae serotype O1 (strain ATCC 39315 / El Tor Inaba N16961) GN=VC_A0192 PE=3 SV=1
8.14367	8.20844	8.2737	8.31908	8.35809	8.3409	8.46873	8.25086	8.55594	8.36879	8.61248	8.50315	+	+		+				biological regulation;regulation of biological process;regulation of biosynthetic process;regulation of cellular biosynthetic process;regulation of cellular macromolecule biosynthetic process;regulation of cellular metabolic process;regulation of cellular process;regulation of gene expression;regulation of macromolecule biosynthetic process;regulation of macromolecule metabolic process;regulation…	binding;DNA binding;nucleic acid binding	cell part;cytoplasm;intracellular part		GO:0006355;GO:0006950;GO:0009266;GO:0009409;GO:0009628;GO:0009889;GO:0010468;GO:0010556;GO:0019219;GO:0019222;GO:0031323;GO:0031326;GO:0050789;GO:0050794;GO:0050896;GO:0051171;GO:0051252;GO:0060255;GO:0065007;GO:0080090;GO:2000112	GO:0003676;GO:0003677;GO:0005488	GO:0005737;GO:0044424;GO:0044464		103.94	0	7.5314	162870000	218600000	277380000	320670016	1.31511	1.53845	-0.130755	1.03599	-0.216574	1.63688	-0.286202	1.02253	-0.155447	0.396834	-0.0858192	0.23871	-0.0696281	Q9KMY2	>tr|Q9KMY2|Q9KMY2_VIBCH Cold shock DNA-binding domain protein OS=Vibrio cholerae serotype O1 (strain ATCC 39315 / El Tor Inaba N16961) GN=VC_A0184 PE=4 SV=1
7.82533	7.69682	7.66086	7.76103	7.85285	7.69353	8.801	8.62485	8.87695	8.58714	8.84598	8.76774	+		+	+	+	+		biological regulation;biosynthetic process;cellular biosynthetic process;cellular macromolecule biosynthetic process;cellular macromolecule metabolic process;cellular metabolic process;cellular nitrogen compound metabolic process;cellular process;macromolecule biosynthetic process;macromolecule metabolic process;metabolic process;nitrogen compound metabolic process;nucleic acid metabolic process;…	binding;DNA binding;nucleic acid binding	cell part;cytoplasm;intracellular part		GO:0006139;GO:0006351;GO:0006355;GO:0006807;GO:0006950;GO:0008152;GO:0009058;GO:0009059;GO:0009266;GO:0009409;GO:0009628;GO:0009889;GO:0009987;GO:0010468;GO:0010556;GO:0016070;GO:0019219;GO:0019222;GO:0031323;GO:0031326;GO:0032774;GO:0034641;GO:0034645;GO:0043170;GO:0044237;GO:0044238;GO:0044249;GO:0044260;GO:0050789;GO:0050794;GO:0050896;GO:0051171;GO:0051252;GO:0060255;GO:0065007;GO:0080090;GO:…	GO:0003676;GO:0003677;GO:0005488	GO:0005737;GO:0044424;GO:0044464		70.206	0	7.6285	54145668	59439332	602409984	557896640	5.6506	0.240377	-0.0414661	3.49771	-1.03993	3.41065	-1.00595	3.37671	-0.964483	3.46747	-0.998465	0.115384	0.0339826	Q9KN00	>sp|Q9KN00|CSPA_VIBCH Cold shock-like protein CspA OS=Vibrio cholerae serotype O1 (strain ATCC 39315 / El Tor Inaba N16961) GN=cspA PE=3 SV=1
9.38189	9.43713	9.37521	9.33882	9.34165	9.3469	9.81064	9.83921	9.93934	9.81348	9.78364	9.78285	+	+	+	+	+	+			binding;carbon-carbon lyase activity;catalytic activity;cofactor binding;lyase activity;pyridoxal phosphate binding;tryptophanase activity;vitamin B6 binding;vitamin binding		Nitrogen metabolism;Tryptophan metabolism		GO:0003824;GO:0005488;GO:0009034;GO:0016829;GO:0016830;GO:0019842;GO:0030170;GO:0048037;GO:0070279		ko00380;ko00910	323.31	0	52.92	2505966592	2200233216	7356066816	6216666624	6.54238	1.3177	0.0556208	3.35566	-0.464986	4.24386	-0.395246	5.77923	-0.450866	3.73558	-0.520607	0.799674	0.0697406	Q9KN05	>sp|Q9KN05|TNAA_VIBCH Tryptophanase OS=Vibrio cholerae serotype O1 (strain ATCC 39315 / El Tor Inaba N16961) GN=tnaA PE=3 SV=1
6.72993	6.8347	6.88012	6.93886	6.97786	6.99688	6.97452	6.95271	6.96625	7.06089	7.00975	6.96237	+	+	+	+				response to stimulus;response to stress				GO:0006950;GO:0050896				38.144	0	35.356	6.59727e+06	9372667	9216933	10300633	2.28987	1.51597	-0.156278	1.5359	-0.149575	1.68664	-0.196081	0.527998	-0.0398032	0.135718	0.00670322	0.730854	-0.0465064	Q9KN07	>tr|Q9KN07|Q9KN07_VIBCH Uncharacterized protein OS=Vibrio cholerae serotype O1 (strain ATCC 39315 / El Tor Inaba N16961) GN=VC_A0159 PE=4 SV=1
7.84296	7.98615	7.91355	7.83299	7.86944	7.91645	8.4982	8.59372	8.32779	8.54588	8.54366	8.4675	+		+	+	+	+										211.39	0	37.965	82822664	74870336	306673344	331520000	4.92776	0.359093	0.0412585	2.50072	-0.559015	3.6164	-0.604792	4.27967	-0.646051	2.74339	-0.600274	0.217423	-0.0457773	Q9KN22	>tr|Q9KN22|Q9KN22_VIBCH Immunogenic protein OS=Vibrio cholerae serotype O1 (strain ATCC 39315 / El Tor Inaba N16961) GN=VC_A0144 PE=4 SV=1
7.67061	7.76358	7.69613	7.77651	7.69548	7.68138	7.48206	7.54205	7.56034	7.58043	7.60264	7.65633	+		+		+	+		amine metabolic process;aminoglycan catabolic process;aminoglycan metabolic process;carbohydrate catabolic process;carbohydrate metabolic process;catabolic process;chitin catabolic process;chitin metabolic process;macromolecule catabolic process;macromolecule metabolic process;metabolic process;nitrogen compound metabolic process;polysaccharide catabolic process;polysaccharide metabolic process;p…	binding;carbohydrate binding;catalytic activity;chitinase activity;hydrolase activity;hydrolase activity, acting on glycosyl bonds;hydrolase activity, hydrolyzing O-glycosyl compounds	extracellular region;viral capsid;virion part		GO:0000272;GO:0005975;GO:0005976;GO:0006022;GO:0006026;GO:0006030;GO:0006032;GO:0006807;GO:0008152;GO:0009056;GO:0009057;GO:0009308;GO:0016052;GO:0043170;GO:0044238	GO:0003824;GO:0004553;GO:0004568;GO:0005488;GO:0016787;GO:0016798;GO:0030246	GO:0005576;GO:0019028;GO:0044423		127.95	0	44.383	51511332	52463000	33839000	41144668	2.59015	0.0659549	-0.00768296	2.12326	0.181958	1.27311	0.0969748	1.31634	0.104658	2.126	0.189641	1.22254	-0.0849829	Q9KN26	>tr|Q9KN26|Q9KN26_VIBCH Spindolin-related protein OS=Vibrio cholerae serotype O1 (strain ATCC 39315 / El Tor Inaba N16961) GN=VC_A0140 PE=4 SV=1
8.16536	8.21261	8.22409	8.0959	8.10212	8.14894	8.16128	8.15195	8.07828	7.88625	7.96089	8.00749	+	+		+	+		+	alcohol metabolic process;alditol metabolic process;carbohydrate metabolic process;catabolic process;cellular carbohydrate metabolic process;cellular catabolic process;cellular lipid catabolic process;cellular lipid metabolic process;cellular metabolic process;cellular process;glycerol metabolic process;lipid catabolic process;lipid metabolic process;metabolic process;organophosphate metabolic pr…	catalytic activity;glycerophosphodiester phosphodiesterase activity;hydrolase activity;hydrolase activity, acting on ester bonds;phosphoric diester hydrolase activity;phosphoric ester hydrolase activity			GO:0005975;GO:0006066;GO:0006071;GO:0006629;GO:0006644;GO:0008152;GO:0009056;GO:0009395;GO:0009987;GO:0016042;GO:0019400;GO:0019637;GO:0019751;GO:0044237;GO:0044238;GO:0044242;GO:0044248;GO:0044255;GO:0044262;GO:0044281	GO:0003824;GO:0008081;GO:0008889;GO:0016787;GO:0016788;GO:0042578			192.97	0	42.086	159010000	130710000	135536672	90028336	3.14903	1.58899	0.0850337	1.03616	0.0701882	2.48586	0.249147	1.8633	0.164113	0.18153	-0.0148455	1.81652	0.178959	Q9KN30	>tr|Q9KN30|Q9KN30_VIBCH Glycerophosphoryl diester phosphodiesterase OS=Vibrio cholerae serotype O1 (strain ATCC 39315 / El Tor Inaba N16961) GN=VC_A0136 PE=4 SV=1
8.3676	8.46249	8.25037	8.3294	8.39347	8.37598	7.9994	7.93001	8.16119	7.95664	8.07525	8.0959	+		+	+	+	+			active transmembrane transporter activity;ATPase activity;ATPase activity, coupled;ATPase activity, coupled to movement of substances;ATPase activity, coupled to transmembrane movement of substances;carbohydrate transmembrane transporter activity;carbohydrate-importing ATPase activity;carbohydrate-transporting ATPase activity;catalytic activity;D-ribose transmembrane transporter activity;D-ribose…		ABC transporters;Bacterial chemotaxis		GO:0003824;GO:0005215;GO:0015144;GO:0015145;GO:0015146;GO:0015399;GO:0015405;GO:0015407;GO:0015591;GO:0015608;GO:0015611;GO:0016462;GO:0016787;GO:0016817;GO:0016818;GO:0016820;GO:0016887;GO:0017111;GO:0022804;GO:0022857;GO:0022891;GO:0022892;GO:0042623;GO:0042626;GO:0043211;GO:0043492;GO:0051119		ko02010;ko02030	323.31	0	30.879	233723328	232870000	109973000	111376000	2.75105	0.0321685	-0.00612831	1.63843	0.329951	1.87252	0.317554	2.6183	0.323683	2.0396	0.33608	0.0526265	-0.012397	Q9KN35	>tr|Q9KN35|Q9KN35_VIBCH Ribose ABC transporter, periplasmic D-ribose-binding protein OS=Vibrio cholerae serotype O1 (strain ATCC 39315 / El Tor Inaba N16961) GN=VC_A0130 PE=4 SV=1
7.86816	7.95944	7.79399	7.8901	7.95102	7.80479	7.31509	7.18639	7.36912	7.21885	7.37552	7.16095	+		+	+	+	+										27.879	0	13.668	75709336	76924664	19804334	18260000	4.59897	0.0432783	-0.00811259	2.89319	0.583659	2.83172	0.622088	2.91905	0.6302	2.99785	0.591772	0.173385	0.0384288	Q9KN41	>tr|Q9KN41|Q9KN41_VIBCH Uncharacterized protein OS=Vibrio cholerae serotype O1 (strain ATCC 39315 / El Tor Inaba N16961) GN=VC_A0124 PE=1 SV=1
7.999	7.88621	7.93966	7.76782	7.77981	7.84794	8.22657	8.22523	8.11267	8.09363	8.05427	8.09667	+	+	+	+	+	+										279.81	0	55.61	87916664	63092332	155360000	120766664	4.21291	1.59898	0.143106	2.1084	-0.246534	1.77807	-0.139896	3.24185	-0.283003	3.00024	-0.38964	1.24728	0.106637	Q9KN57	>tr|Q9KN57|Q9KN57_VIBCH Uncharacterized protein OS=Vibrio cholerae serotype O1 (strain ATCC 39315 / El Tor Inaba N16961) GN=VC_A0108 PE=1 SV=1
7.40149	7.3816	7.56621	7.34823	7.24733	7.30786	7.59914	7.51287	7.81885	7.473	7.6756	7.43712	+				+	+										143.29	0	18.489	28704334	20095666	46066668	34819000	1.41989	1.06745	0.148627	0.830234	-0.193852	0.345509	-0.0788045	1.33325	-0.227432	1.6348	-0.342479	0.416827	0.115047	Q9KN58	>tr|Q9KN58|Q9KN58_VIBCH Uncharacterized protein OS=Vibrio cholerae serotype O1 (strain ATCC 39315 / El Tor Inaba N16961) GN=VC_A0107 PE=1 SV=1
7.09961	7.16512	7.11846	7.0445	7.16456	7.07602	6.94809	7.0197	6.87592	7.08304	7.11836	7.08831	+		+				+									48.099	0	41.251	13446667	12533000	8950767	12498333	1.9702	0.329346	0.0327059	1.76421	0.17983	0.627174	0.0311623	0.0135838	-0.00154368	1.25775	0.147124	1.58903	-0.148667	Q9KN59	>tr|Q9KN59|Q9KN59_VIBCH Uncharacterized protein OS=Vibrio cholerae serotype O1 (strain ATCC 39315 / El Tor Inaba N16961) GN=VC_A0106 PE=4 SV=1
7.43135	7.40007	7.41552	7.43686	7.50418	7.42101	7.69385	7.62122	7.51644	7.60885	7.56059	7.58703	+		+	+	+				catalytic activity;oxidoreductase activity				GO:0003824;GO:0016491			40.818	0	39.133	26051666	28545666	41353668	38542000	2.39705	0.640169	-0.0383717	1.69155	-0.194856	3.28681	-0.169839	1.97339	-0.131467	1.27735	-0.156484	0.178133	0.0250168	Q9KN66	>tr|Q9KN66|Q9KN66_VIBCH Oxidoreductase, Gfo/Idh/MocA family OS=Vibrio cholerae serotype O1 (strain ATCC 39315 / El Tor Inaba N16961) GN=VC_A0099 PE=4 SV=1
7.68494	7.72491	7.69878	7.66676	7.69237	7.64287	7.67605	7.63708	7.62306	7.69447	7.72306	7.69119	+		+				+	macromolecule metabolic process;metabolic process;primary metabolic process;protein metabolic process;proteolysis	catalytic activity;endopeptidase activity;hydrolase activity;peptidase activity;peptidase activity, acting on L-amino acid peptides;serine hydrolase activity;serine-type endopeptidase activity;serine-type peptidase activity		African trypanosomiasis;Chagas disease (American trypanosomiasis)	GO:0006508;GO:0008152;GO:0019538;GO:0043170;GO:0044238	GO:0003824;GO:0004175;GO:0004252;GO:0008233;GO:0008236;GO:0016787;GO:0017171;GO:0070011		ko05142;ko05143	279.29	0	75.424	50488668	46537668	44257000	50482668	1.42892	0.896851	0.0355425	1.36228	0.0574781	0.000592223	-2.81334e-05	0.950433	-0.0355706	0.441089	0.0219356	1.42305	-0.0575062	Q9KNA2	>tr|Q9KNA2|Q9KNA2_VIBCH Protease II OS=Vibrio cholerae serotype O1 (strain ATCC 39315 / El Tor Inaba N16961) GN=VC_A0063 PE=4 SV=1
7.49279	7.41497	7.53294	7.5568	7.45966	7.5888	7.87379	7.82433	7.9296	8.01778	8.10975	7.99642	+		+	+	+	+	+			cell outer membrane;cell part;external encapsulating structure part;membrane;outer membrane				GO:0009279;GO:0016020;GO:0019867;GO:0044462;GO:0044464		95.765	0	12.823	30405666	34552000	75516000	110703336	5.10641	0.454428	-0.0548507	2.99531	-0.395672	3.47654	-0.561083	3.20143	-0.506232	2.63835	-0.340821	1.63567	-0.165411	Q9KNA6	>tr|Q9KNA6|Q9KNA6_VIBCH Major outer membrane lipoprotein OS=Vibrio cholerae serotype O1 (strain ATCC 39315 / El Tor Inaba N16961) GN=VC_A0059 PE=4 SV=1
7.70173	7.65468	7.53196	7.84648	7.77833	7.65908	7.45219	7.44093	7.56277	7.55444	7.51347	7.57649	+				+	+										48.763	0	10.81	43169668	58620000	30822334	35392668	2.01139	0.818807	-0.131839	1.0617	0.144165	0.686916	0.0813236	1.67678	0.213163	1.83163	0.276004	0.66151	-0.0628413	Q9KNC2	>tr|Q9KNC2|Q9KNC2_VIBCH Uncharacterized protein OS=Vibrio cholerae serotype O1 (strain ATCC 39315 / El Tor Inaba N16961) GN=VC_A0043 PE=4 SV=1
8.31101	8.32754	8.23343	8.36612	8.2159	8.20715	8.07059	8.08856	8.18293	8.03858	8.16044	8.132	+		+	+												84.582	0	16.43	196136672	185953328	130883336	129833336	1.72564	0.177016	0.0276025	1.75448	0.176634	1.73658	0.18032	1.13321	0.152717	1.12579	0.149031	0.0243325	0.00368595	Q9KNC8	>tr|Q9KNC8|Q9KNC8_VIBCH Uncharacterized protein OS=Vibrio cholerae serotype O1 (strain ATCC 39315 / El Tor Inaba N16961) GN=VC_A0037 PE=4 SV=1
7.30597	7.47584	7.36977	7.32991	7.44135	7.35189	6.83742	6.72732	6.87403	6.77085	6.70871	6.76687	+		+	+	+	+										294.48	0	20.388	24523666	23829334	6.56563e+06	5.61983e+06	5.59053	0.0543587	0.00948127	2.99979	0.570939	3.54132	0.635055	4.02957	0.625573	3.26297	0.561458	0.591323	0.0641157	Q9KND3	>tr|Q9KND3|Q9KND3_VIBCH Uncharacterized protein OS=Vibrio cholerae serotype O1 (strain ATCC 39315 / El Tor Inaba N16961) GN=VC_A0032 PE=4 SV=1
7.01932	7.27701	7.12603	7.17047	7.21809	7.11056	7.03555	7.06692	7.08048	7.59232	7.61954	7.52919	+			+	+	+	+	amine metabolic process;aminoglycan catabolic process;aminoglycan metabolic process;carbohydrate catabolic process;carbohydrate metabolic process;catabolic process;chitin catabolic process;chitin metabolic process;macromolecule catabolic process;macromolecule metabolic process;metabolic process;nitrogen compound metabolic process;polysaccharide catabolic process;polysaccharide metabolic process;p…	binding;carbohydrate binding;catalytic activity;chitinase activity;hydrolase activity;hydrolase activity, acting on glycosyl bonds;hydrolase activity, hydrolyzing O-glycosyl compounds	extracellular region	Amino sugar and nucleotide sugar metabolism	GO:0000272;GO:0005975;GO:0005976;GO:0006022;GO:0006026;GO:0006030;GO:0006032;GO:0006807;GO:0008152;GO:0009056;GO:0009057;GO:0009308;GO:0016052;GO:0043170;GO:0044238	GO:0003824;GO:0004553;GO:0004568;GO:0005488;GO:0016787;GO:0016798;GO:0030246	GO:0005576	ko00520	243.23	0	90.313	14248667	14743000	11518333	38192332	3.93323	0.114723	-0.0255806	0.452799	0.0798055	2.28367	-0.43956	3.26501	-0.413979	1.44719	0.105386	4.19134	-0.519365	Q9KND8	>tr|Q9KND8|Q9KND8_VIBCH Chitinase OS=Vibrio cholerae serotype O1 (strain ATCC 39315 / El Tor Inaba N16961) GN=VC_A0027 PE=4 SV=1
7.88955	8.0798	8.09628	7.90273	7.98639	8.03858	8.38369	8.25806	8.38164	8.37195	8.45048	8.30211	+		+	+	+	+										323.31	0	23.633	107511336	95379336	221293328	239376672	3.21234	0.2338	0.0459765	1.82073	-0.319254	1.95551	-0.352974	2.62157	-0.39895	2.50576	-0.365231	0.220214	-0.0337194	Q9KND9	>sp|Q9KND9|Y2826_VIBCH UPF0319 protein VC_A0026 OS=Vibrio cholerae serotype O1 (strain ATCC 39315 / El Tor Inaba N16961) GN=VC_A0026 PE=3 SV=1
6.93567	6.91111	6.90113	6.73946	6.81527	6.73036	7.03531	7.00877	6.95744	7.07085	6.99069	7.04895	+	+	+	+	+	+					Bacterial secretion system				ko03070	54.36	0	77.211	8.24543e+06	5.79957e+06	10039133	10917667	4.03376	2.23193	0.154273	1.55369	-0.0845353	2.01281	-0.120861	2.80255	-0.275134	2.60326	-0.238808	0.476416	-0.0363253	Q9KNE7	>tr|Q9KNE7|Q9KNE7_VIBCH VgrG protein OS=Vibrio cholerae serotype O1 (strain ATCC 39315 / El Tor Inaba N16961) GN=VC_A0018 PE=4 SV=1
7.93531	7.99072	7.90495	7.84595	7.84121	7.77671	8.01544	8.00766	7.96901	8.02135	7.96882	7.99477	+	+			+	+		biosynthetic process;carbohydrate biosynthetic process;carbohydrate metabolic process;cellular biosynthetic process;cellular carbohydrate biosynthetic process;cellular carbohydrate metabolic process;cellular glucan metabolic process;cellular macromolecule biosynthetic process;cellular macromolecule metabolic process;cellular metabolic process;cellular polysaccharide biosynthetic process;cellular …	1,4-alpha-glucan branching enzyme activity;binding;catalytic activity;cation binding;hydrolase activity;hydrolase activity, acting on glycosyl bonds;hydrolase activity, hydrolyzing O-glycosyl compounds;ion binding;transferase activity;transferase activity, transferring glycosyl groups;transferase activity, transferring hexosyl groups		Starch and sucrose metabolism	GO:0000271;GO:0005975;GO:0005976;GO:0005977;GO:0005978;GO:0006073;GO:0006091;GO:0006112;GO:0008152;GO:0009058;GO:0009059;GO:0009250;GO:0009987;GO:0015980;GO:0016051;GO:0033692;GO:0034637;GO:0034645;GO:0043170;GO:0044042;GO:0044237;GO:0044238;GO:0044249;GO:0044260;GO:0044262;GO:0044264;GO:0055114	GO:0003824;GO:0003844;GO:0004553;GO:0005488;GO:0016740;GO:0016757;GO:0016758;GO:0016787;GO:0016798;GO:0043167;GO:0043169		ko00500	197.12	0	84.026	88130336	66438332	99504336	98972336	3.13872	1.6589	0.122371	0.863663	-0.0537106	0.809458	-0.0513226	2.52274	-0.173694	2.57156	-0.176082	0.0388302	0.002388	Q9KNE8	>sp|Q9KNE8|GLGB_VIBCH 1,4-alpha-glucan branching enzyme GlgB OS=Vibrio cholerae serotype O1 (strain ATCC 39315 / El Tor Inaba N16961) GN=glgB PE=3 SV=2
7.71698	7.65578	7.69465	7.60804	7.57563	7.59154	7.73985	7.73968	7.75896	7.66153	7.63494	7.65652	+	+	+		+	+	+	carbohydrate catabolic process;carbohydrate metabolic process;catabolic process;cellular carbohydrate catabolic process;cellular carbohydrate metabolic process;cellular glucan metabolic process;cellular macromolecule metabolic process;cellular metabolic process;cellular polysaccharide catabolic process;cellular polysaccharide metabolic process;cellular process;energy derivation by oxidation of or…	4-alpha-glucanotransferase activity;catalytic activity;glycogen debranching enzyme activity;transferase activity;transferase activity, transferring glycosyl groups;transferase activity, transferring hexosyl groups		Starch and sucrose metabolism	GO:0000272;GO:0005975;GO:0005976;GO:0005977;GO:0005980;GO:0006073;GO:0006091;GO:0006112;GO:0008152;GO:0009056;GO:0009057;GO:0009251;GO:0009987;GO:0015980;GO:0016052;GO:0043170;GO:0044042;GO:0044237;GO:0044238;GO:0044247;GO:0044260;GO:0044262;GO:0044264;GO:0044275;GO:0055114	GO:0003824;GO:0004133;GO:0004134;GO:0016740;GO:0016757;GO:0016758		ko00500	259.68	0	81.38	48963000	39078668	55752000	44786668	4.11641	2.07137	0.0973988	1.39984	-0.0570289	0.905617	0.0381405	2.05457	-0.0592583	3.77408	-0.154428	3.10667	0.0951694	Q9KNF0	>tr|Q9KNF0|Q9KNF0_VIBCH 4-alpha-glucanotransferase OS=Vibrio cholerae serotype O1 (strain ATCC 39315 / El Tor Inaba N16961) GN=VC_A0014 PE=3 SV=1
8.25912	8.15993	8.21272	8.23122	8.24499	8.23837	8.42961	8.45725	8.43048	8.38012	8.38759	8.407	+		+	+	+	+	+	carbohydrate metabolic process;metabolic process;primary metabolic process	binding;catalytic activity;cofactor binding;glycogen phosphorylase activity;phosphorylase activity;pyridoxal phosphate binding;transferase activity;transferase activity, transferring glycosyl groups;transferase activity, transferring hexosyl groups;vitamin B6 binding;vitamin binding		Insulin signaling pathway;Starch and sucrose metabolism	GO:0005975;GO:0008152;GO:0044238	GO:0003824;GO:0004645;GO:0005488;GO:0008184;GO:0016740;GO:0016757;GO:0016758;GO:0019842;GO:0030170;GO:0048037;GO:0070279		ko00500;ko04910	323.31	0	92.565	163106672	173073328	274980000	246443328	4.8484	0.404532	-0.0276057	2.79441	-0.228522	2.43279	-0.180981	4.16845	-0.153375	4.45742	-0.200917	1.76636	0.0475416	Q9KNF1	>tr|Q9KNF1|Q9KNF1_VIBCH Alpha-1,4 glucan phosphorylase OS=Vibrio cholerae serotype O1 (strain ATCC 39315 / El Tor Inaba N16961) GN=VC_A0013 PE=3 SV=1
7.61368	7.61913	7.55925	7.54224	7.66984	7.6774	7.73585	7.755	7.67761	7.54696	7.52308	7.59192	+		+				+	alcohol catabolic process;alcohol metabolic process;aldaric acid catabolic process;aldaric acid metabolic process;amine metabolic process;branched chain family amino acid metabolic process;carbohydrate catabolic process;carbohydrate metabolic process;carboxylic acid catabolic process;carboxylic acid metabolic process;catabolic process;cellular amine metabolic process;cellular amino acid metabolic…	2-hydroxy-3-oxopropionate reductase activity;3-hydroxyisobutyrate dehydrogenase activity;binding;catalytic activity;coenzyme binding;cofactor binding;oxidoreductase activity;oxidoreductase activity, acting on CH-OH group of donors;oxidoreductase activity, acting on the CH-OH group of donors, NAD or NADP as acceptor;phosphogluconate dehydrogenase (decarboxylating) activity		Valine, leucine and isoleucine degradation	GO:0005975;GO:0005996;GO:0006006;GO:0006007;GO:0006066;GO:0006082;GO:0006098;GO:0006139;GO:0006520;GO:0006573;GO:0006732;GO:0006733;GO:0006739;GO:0006740;GO:0006753;GO:0006807;GO:0008152;GO:0009056;GO:0009081;GO:0009117;GO:0009308;GO:0009987;GO:0016052;GO:0016054;GO:0019318;GO:0019320;GO:0019362;GO:0019577;GO:0019579;GO:0019580;GO:0019582;GO:0019752;GO:0034641;GO:0042180;GO:0043436;GO:0043648;GO:…	GO:0003824;GO:0004616;GO:0005488;GO:0008442;GO:0008679;GO:0016491;GO:0016614;GO:0016616;GO:0048037;GO:0050662		ko00280	252.8	0	33.421	39644668	43062000	52972000	35886668	1.78243	0.272046	-0.0324696	1.8514	-0.125462	0.712722	0.0433668	0.71842	0.0758363	0.871891	-0.0929921	2.26801	0.168828	Q9KNF7	>tr|Q9KNF7|Q9KNF7_VIBCH 3-hydroxyisobutyrate dehydrogenase, putative OS=Vibrio cholerae serotype O1 (strain ATCC 39315 / El Tor Inaba N16961) GN=VC_A0007 PE=4 SV=1
8.07951	8.02469	8.00208	7.90315	7.91277	7.9722	7.58774	7.60878	7.67448	7.52613	7.59776	7.69817	+	+	+	+	+	+		biological regulation;biosynthetic process;cellular biosynthetic process;cellular macromolecule biosynthetic process;cellular macromolecule metabolic process;cellular metabolic process;cellular nitrogen compound metabolic process;cellular process;macromolecule biosynthetic process;macromolecule metabolic process;metabolic process;nitrogen compound metabolic process;nucleic acid metabolic process;…	binding;DNA binding;nucleic acid binding	cell part;cytoplasm;intracellular part		GO:0006139;GO:0006351;GO:0006355;GO:0006807;GO:0008152;GO:0009058;GO:0009059;GO:0009889;GO:0009987;GO:0010468;GO:0010556;GO:0016070;GO:0019219;GO:0019222;GO:0031323;GO:0031326;GO:0032774;GO:0034641;GO:0034645;GO:0043170;GO:0044237;GO:0044238;GO:0044249;GO:0044260;GO:0050789;GO:0050794;GO:0051171;GO:0051252;GO:0060255;GO:0065007;GO:0080090;GO:0090304;GO:2000112	GO:0003676;GO:0003677;GO:0005488	GO:0005737;GO:0044424;GO:0044464		216.73	0	26.353	108806664	85205000	42195332	41032668	4.62488	1.5492	0.10605	3.53467	0.411755	2.83477	0.428071	2.3904	0.322021	3.07747	0.305705	0.104337	0.0163161	Q9KNF8	>sp|Q9KNF8|Y2806_VIBCH Probable transcriptional regulatory protein VC_A0006 OS=Vibrio cholerae serotype O1 (strain ATCC 39315 / El Tor Inaba N16961) GN=VC_A0006 PE=3 SV=1
7.22209	7.20504	7.21344	7.14429	7.16423	7.16498	7.22647	7.28459	7.17281	7.30283	7.37273	7.33379	+	+		+	+		+	cellular macromolecule metabolic process;cellular metabolic process;cellular nitrogen compound metabolic process;cellular process;macromolecule metabolic process;macromolecule modification;metabolic process;ncRNA metabolic process;ncRNA processing;nitrogen compound metabolic process;nucleic acid metabolic process;nucleobase-containing compound metabolic process;primary metabolic process;RNA metab…	binding;coenzyme binding;cofactor binding;flavin adenine dinucleotide binding	cell part;cytoplasm;intracellular part		GO:0002097;GO:0002098;GO:0006139;GO:0006396;GO:0006399;GO:0006400;GO:0006807;GO:0008033;GO:0008152;GO:0009451;GO:0009987;GO:0016070;GO:0034470;GO:0034641;GO:0034660;GO:0043170;GO:0043412;GO:0044237;GO:0044238;GO:0044260;GO:0090304	GO:0005488;GO:0048037;GO:0050660;GO:0050662	GO:0005737;GO:0044424;GO:0044464		79.262	0	70.171	16352333	14386000	16996334	21746666	2.89113	2.57611	0.055689	0.166644	-0.0144318	2.38588	-0.122925	2.95404	-0.178614	0.997214	-0.0701208	1.33284	-0.108493	Q9KNG4	>sp|Q9KNG4|MNMG_VIBCH tRNA uridine 5-carboxymethylaminomethyl modification enzyme MnmG OS=Vibrio cholerae serotype O1 (strain ATCC 39315 / El Tor Inaba N16961) GN=mnmG PE=3 SV=1
7.51772	7.47606	7.58721	7.44719	7.40504	7.58963	7.54758	7.58815	7.49297	7.92099	7.94921	7.88591	+			+	+		+	ATP biosynthetic process;ATP metabolic process;ATP synthesis coupled proton transport;biosynthetic process;cation transport;cellular biosynthetic process;cellular metabolic process;cellular nitrogen compound biosynthetic process;cellular nitrogen compound metabolic process;cellular process;energy coupled proton transport, down electrochemical gradient;establishment of localization;heterocycle bio…	cation transmembrane transporter activity;hydrogen ion transmembrane transporter activity;hydrogen ion transporting ATP synthase activity, rotational mechanism;inorganic cation transmembrane transporter activity;ion transmembrane transporter activity;monovalent inorganic cation transmembrane transporter activity;substrate-specific transmembrane transporter activity;substrate-specific transporter …	cell part;integral to membrane;intracellular part;intrinsic to membrane;macromolecular complex;membrane part;plasma membrane part;plasma membrane proton-transporting ATP synthase complex, coupling factor F(o);protein complex;proton-transporting ATP synthase complex, coupling factor F(o);proton-transporting two-sector ATPase complex, proton-transporting domain	Oxidative phosphorylation;Photosynthesis	GO:0006139;GO:0006163;GO:0006164;GO:0006753;GO:0006754;GO:0006807;GO:0006810;GO:0006811;GO:0006812;GO:0006818;GO:0008152;GO:0009058;GO:0009117;GO:0009141;GO:0009142;GO:0009144;GO:0009145;GO:0009150;GO:0009152;GO:0009165;GO:0009199;GO:0009201;GO:0009205;GO:0009206;GO:0009259;GO:0009260;GO:0009987;GO:0015672;GO:0015985;GO:0015986;GO:0015992;GO:0018130;GO:0034220;GO:0034641;GO:0034654;GO:0042777;GO:…	GO:0005215;GO:0008324;GO:0015075;GO:0015077;GO:0015078;GO:0022857;GO:0022890;GO:0022891;GO:0022892;GO:0046933	GO:0016021;GO:0031224;GO:0032991;GO:0033177;GO:0043234;GO:0044424;GO:0044425;GO:0044459;GO:0044464;GO:0045263;GO:0045264	ko00190;ko00195	151.25	0	17.66	33840668	30761666	35046000	83075664	4.03837	0.290462	0.0463797	0.138083	-0.0159012	3.33578	-0.391707	2.76183	-0.438087	0.42723	-0.062281	3.46449	-0.375806	Q9KNH1	>sp|Q9KNH1|ATPF_VIBCH ATP synthase subunit b OS=Vibrio cholerae serotype O1 (strain ATCC 39315 / El Tor Inaba N16961) GN=atpF PE=3 SV=1
9.17132	9.19813	9.16646	9.23802	9.18974	9.22963	9.04809	9.04202	9.15791	9.17661	9.18492	9.19058	+					+		ATP biosynthetic process;ATP hydrolysis coupled proton transport;ATP metabolic process;ATP synthesis coupled proton transport;biosynthetic process;cation transport;cellular biosynthetic process;cellular metabolic process;cellular nitrogen compound biosynthetic process;cellular nitrogen compound metabolic process;cellular process;energy coupled proton transport, against electrochemical gradient;en…	active transmembrane transporter activity;adenyl nucleotide binding;adenyl ribonucleotide binding;ATP binding;ATPase activity;ATPase activity, coupled;ATPase activity, coupled to movement of substances;ATPase activity, coupled to transmembrane movement of ions;ATPase activity, coupled to transmembrane movement of substances;binding;catalytic activity;cation transmembrane transporter activity;cati…	cell part;intracellular part;macromolecular complex;membrane part;plasma membrane part;plasma membrane proton-transporting ATP synthase complex, catalytic core F(1);protein complex;proton-transporting ATP synthase complex, catalytic core F(1);proton-transporting two-sector ATPase complex, catalytic domain	Oxidative phosphorylation;Photosynthesis	GO:0006139;GO:0006163;GO:0006164;GO:0006753;GO:0006754;GO:0006807;GO:0006810;GO:0006811;GO:0006812;GO:0006818;GO:0008152;GO:0009058;GO:0009117;GO:0009141;GO:0009142;GO:0009144;GO:0009145;GO:0009150;GO:0009152;GO:0009165;GO:0009199;GO:0009201;GO:0009205;GO:0009206;GO:0009259;GO:0009260;GO:0009987;GO:0015672;GO:0015985;GO:0015986;GO:0015988;GO:0015991;GO:0015992;GO:0018130;GO:0034220;GO:0034641;GO:…	GO:0000166;GO:0003824;GO:0005215;GO:0005488;GO:0005524;GO:0008324;GO:0015075;GO:0015077;GO:0015078;GO:0015399;GO:0015405;GO:0016462;GO:0016787;GO:0016817;GO:0016818;GO:0016820;GO:0016887;GO:0017076;GO:0017111;GO:0019829;GO:0022804;GO:0022857;GO:0022890;GO:0022891;GO:0022892;GO:0030554;GO:0032553;GO:0032555;GO:0032559;GO:0035639;GO:0042623;GO:0042625;GO:0042626;GO:0043492;GO:0046933;GO:0046961	GO:0032991;GO:0033178;GO:0043234;GO:0044424;GO:0044425;GO:0044459;GO:0044464;GO:0045261;GO:0045262	ko00190;ko00195	323.31	0	55.649	1509600000	1658200064	1219066624	1527833344	2.03314	1.06592	-0.0404943	1.15931	0.0959622	0.194634	-0.00540098	1.06859	0.0350933	1.55202	0.136456	1.25612	-0.101363	Q9KNH3	>sp|Q9KNH3|ATPA_VIBCH ATP synthase subunit alpha OS=Vibrio cholerae serotype O1 (strain ATCC 39315 / El Tor Inaba N16961) GN=atpA PE=3 SV=2
8.33987	8.2758	8.24269	8.11564	8.22657	8.28961	7.99852	8.08339	8.155	8.12281	8.14139	8.20699	+		+	+				ATP biosynthetic process;ATP metabolic process;ATP synthesis coupled proton transport;biosynthetic process;cation transport;cellular biosynthetic process;cellular metabolic process;cellular nitrogen compound biosynthetic process;cellular nitrogen compound metabolic process;cellular process;energy coupled proton transport, down electrochemical gradient;establishment of localization;heterocycle bio…	active transmembrane transporter activity;adenyl nucleotide binding;adenyl ribonucleotide binding;ATP binding;ATPase activity;ATPase activity, coupled;ATPase activity, coupled to movement of substances;ATPase activity, coupled to transmembrane movement of ions;ATPase activity, coupled to transmembrane movement of substances;binding;catalytic activity;cation transmembrane transporter activity;cati…	cell part;intracellular part;macromolecular complex;membrane part;plasma membrane part;plasma membrane proton-transporting ATP synthase complex, catalytic core F(1);protein complex;proton-transporting ATP synthase complex, catalytic core F(1);proton-transporting two-sector ATPase complex, catalytic domain	Oxidative phosphorylation;Photosynthesis	GO:0006139;GO:0006163;GO:0006164;GO:0006753;GO:0006754;GO:0006807;GO:0006810;GO:0006811;GO:0006812;GO:0006818;GO:0008152;GO:0009058;GO:0009117;GO:0009141;GO:0009142;GO:0009144;GO:0009145;GO:0009150;GO:0009152;GO:0009165;GO:0009199;GO:0009201;GO:0009205;GO:0009206;GO:0009259;GO:0009260;GO:0009987;GO:0015672;GO:0015985;GO:0015986;GO:0015992;GO:0018130;GO:0034220;GO:0034641;GO:0034654;GO:0042777;GO:…	GO:0000166;GO:0003824;GO:0005215;GO:0005488;GO:0005524;GO:0008324;GO:0015075;GO:0015077;GO:0015078;GO:0015399;GO:0015405;GO:0016462;GO:0016787;GO:0016817;GO:0016818;GO:0016820;GO:0016887;GO:0017076;GO:0017111;GO:0019829;GO:0022804;GO:0022857;GO:0022890;GO:0022891;GO:0022892;GO:0030554;GO:0032553;GO:0032555;GO:0032559;GO:0035639;GO:0042623;GO:0042625;GO:0042626;GO:0043492;GO:0046933;GO:0046961	GO:0032991;GO:0033178;GO:0043234;GO:0044424;GO:0044425;GO:0044459;GO:0044464;GO:0045261;GO:0045262	ko00190;ko00195	252.42	0	31.862	194093328	164603328	121240000	144073328	1.51587	0.576777	0.0755084	1.74638	0.207145	1.55264	0.129058	0.398006	0.0535494	0.902432	0.131637	0.683747	-0.0780875	Q9KNH4	>sp|Q9KNH4|ATPG_VIBCH ATP synthase gamma chain OS=Vibrio cholerae serotype O1 (strain ATCC 39315 / El Tor Inaba N16961) GN=atpG PE=3 SV=1
7.4574	7.48021	7.46288	7.41238	7.46564	7.36448	7.22409	7.18969	7.22706	7.33989	7.37425	7.20656	+		+	+		+		ATP biosynthetic process;ATP metabolic process;ATP synthesis coupled proton transport;biosynthetic process;cation transport;cellular biosynthetic process;cellular metabolic process;cellular nitrogen compound biosynthetic process;cellular nitrogen compound metabolic process;cellular process;energy coupled proton transport, down electrochemical gradient;establishment of localization;heterocycle bio…	active transmembrane transporter activity;adenyl nucleotide binding;adenyl ribonucleotide binding;ATP binding;ATPase activity;ATPase activity, coupled;ATPase activity, coupled to movement of substances;ATPase activity, coupled to transmembrane movement of ions;ATPase activity, coupled to transmembrane movement of substances;binding;catalytic activity;cation transmembrane transporter activity;cati…	cell part;intracellular part;macromolecular complex;membrane part;plasma membrane part;plasma membrane proton-transporting ATP synthase complex, catalytic core F(1);protein complex;proton-transporting ATP synthase complex, catalytic core F(1);proton-transporting two-sector ATPase complex, catalytic domain	Oxidative phosphorylation;Photosynthesis	GO:0006139;GO:0006163;GO:0006164;GO:0006753;GO:0006754;GO:0006807;GO:0006810;GO:0006811;GO:0006812;GO:0006818;GO:0008152;GO:0009058;GO:0009117;GO:0009141;GO:0009142;GO:0009144;GO:0009145;GO:0009150;GO:0009152;GO:0009165;GO:0009199;GO:0009201;GO:0009205;GO:0009206;GO:0009259;GO:0009260;GO:0009987;GO:0015672;GO:0015985;GO:0015986;GO:0015992;GO:0018130;GO:0034220;GO:0034641;GO:0034654;GO:0042777;GO:…	GO:0000166;GO:0003824;GO:0005215;GO:0005488;GO:0005524;GO:0008324;GO:0015075;GO:0015077;GO:0015078;GO:0015399;GO:0015405;GO:0016462;GO:0016787;GO:0016817;GO:0016818;GO:0016820;GO:0016887;GO:0017076;GO:0017111;GO:0019829;GO:0022804;GO:0022857;GO:0022890;GO:0022891;GO:0022892;GO:0030554;GO:0032553;GO:0032555;GO:0032559;GO:0035639;GO:0042623;GO:0042625;GO:0042626;GO:0043492;GO:0046933;GO:0046961	GO:0032991;GO:0033178;GO:0043234;GO:0044424;GO:0044425;GO:0044459;GO:0044464;GO:0045261;GO:0045262	ko00190;ko00195	19.42	0	15.246	29304666	26069334	16366000	20545000	2.81438	0.811995	0.0526649	4.28171	0.253213	1.4407	0.159928	0.845601	0.107263	2.50154	0.200548	0.822706	-0.0932849	Q9KNH6	>sp|Q9KNH6|ATPE_VIBCH ATP synthase epsilon chain OS=Vibrio cholerae serotype O1 (strain ATCC 39315 / El Tor Inaba N16961) GN=atpC PE=3 SV=1
8.50751	8.51611	8.52852	8.59641	8.58225	8.57323	8.41636	8.52329	8.44248	8.46424	8.48346	8.49316	+	+		+	+	+		carboxylic acid catabolic process;carboxylic acid metabolic process;catabolic process;cellular catabolic process;cellular ketone metabolic process;cellular lipid catabolic process;cellular lipid metabolic process;cellular metabolic process;cellular process;fatty acid beta-oxidation;fatty acid catabolic process;fatty acid metabolic process;fatty acid oxidation;lipid catabolic process;lipid metabol…	3-hydroxyacyl-CoA dehydrogenase activity;3-hydroxybutyryl-CoA epimerase activity;binding;carbon-oxygen lyase activity;catalytic activity;coenzyme binding;cofactor binding;dodecenoyl-CoA delta-isomerase activity;enoyl-CoA hydratase activity;hydro-lyase activity;intramolecular oxidoreductase activity;intramolecular oxidoreductase activity, transposing C=C bonds;isomerase activity;lyase activity;oxi…		beta-Alanine metabolism;Biosynthesis of unsaturated fatty acids;Butanoate metabolism;Caprolactam degradation;Carbon fixation pathways in prokaryotes;Fatty acid metabolism;Geraniol degradation;Limonene and pinene degradation;Lysine degradation;Propanoate metabolism;Tryptophan metabolism;Valine, leucine and isoleucine degradation	GO:0006082;GO:0006629;GO:0006631;GO:0006635;GO:0008152;GO:0009056;GO:0009062;GO:0009987;GO:0016042;GO:0016054;GO:0019395;GO:0019752;GO:0030258;GO:0032787;GO:0034440;GO:0042180;GO:0043436;GO:0044237;GO:0044238;GO:0044242;GO:0044248;GO:0044255;GO:0044281;GO:0044282;GO:0046395;GO:0055114;GO:0072329	GO:0003824;GO:0003857;GO:0004165;GO:0004300;GO:0005488;GO:0008692;GO:0016491;GO:0016614;GO:0016616;GO:0016829;GO:0016835;GO:0016836;GO:0016853;GO:0016854;GO:0016856;GO:0016860;GO:0016863;GO:0048037;GO:0050662		ko00071;ko00280;ko00281;ko00310;ko00380;ko00410;ko00640;ko00650;ko00720;ko00903;ko00930;ko01040	323.31	0	78.107	329203328	383766688	290493312	302309984	2.34139	2.73248	-0.0665836	0.799405	0.0566689	1.62168	0.0370919	3.17363	0.103676	1.69933	0.123253	0.230564	-0.019577	Q9KNI1	>sp|Q9KNI1|FADB_VIBCH Fatty acid oxidation complex subunit alpha OS=Vibrio cholerae serotype O1 (strain ATCC 39315 / El Tor Inaba N16961) GN=fadB PE=3 SV=1
8.8068	8.6858	8.76779	8.88003	8.86061	8.94896	9.19413	9.18458	9.28441	9.14882	9.11637	9.16107	+	+	+	+	+	+		amine biosynthetic process;amine metabolic process;biosynthetic process;carboxylic acid biosynthetic process;carboxylic acid metabolic process;cellular amine metabolic process;cellular amino acid biosynthetic process;cellular amino acid metabolic process;cellular biosynthetic process;cellular ketone metabolic process;cellular metabolic process;cellular nitrogen compound biosynthetic process;cellu…	acid-ammonia (or amide) ligase activity;adenyl nucleotide binding;adenyl ribonucleotide binding;ammonia ligase activity;ATP binding;binding;catalytic activity;glutamate-ammonia ligase activity;ligase activity;ligase activity, forming carbon-nitrogen bonds;nucleotide binding;purine nucleotide binding;purine ribonucleoside triphosphate binding;purine ribonucleotide binding;ribonucleotide binding	cell part;cytoplasm;intracellular part	Alanine, aspartate and glutamate metabolism;Arginine and proline metabolism;Nitrogen metabolism;Two-component system	GO:0006082;GO:0006520;GO:0006541;GO:0006542;GO:0006807;GO:0008152;GO:0008652;GO:0009058;GO:0009064;GO:0009084;GO:0009308;GO:0009309;GO:0009399;GO:0009987;GO:0016053;GO:0019752;GO:0034641;GO:0042180;GO:0043436;GO:0044106;GO:0044237;GO:0044238;GO:0044249;GO:0044271;GO:0044281;GO:0044283;GO:0046394;GO:0071941	GO:0000166;GO:0003824;GO:0004356;GO:0005488;GO:0005524;GO:0016211;GO:0016874;GO:0016879;GO:0016880;GO:0017076;GO:0030554;GO:0032553;GO:0032555;GO:0032559;GO:0035639	GO:0005737;GO:0044424;GO:0044464	ko00250;ko00330;ko00910;ko02020	323.31	0	51.751	570613312	791070016	1672700032	1388333312	5.07067	1.48584	-0.14307	3.21391	-0.467573	3.28503	-0.388623	2.91947	-0.245552	2.83677	-0.324503	1.07611	0.0789502	Q9KNJ2	>sp|Q9KNJ2|GLN1B_VIBCH Glutamine synthetase OS=Vibrio cholerae serotype O1 (strain ATCC 39315 / El Tor Inaba N16961) GN=glnAv PE=3 SV=1
7.74191	7.76632	7.66392	7.5175	7.58813	7.6503	7.40099	7.4695	7.54865	7.29887	7.33252	7.33222	+	+	+	+	+		+	cellular macromolecule metabolic process;cellular metabolic process;cellular process;cellular protein metabolic process;macromolecule metabolic process;metabolic process;primary metabolic process;protein folding;protein metabolic process		cell part;cytoplasm;intracellular part		GO:0006457;GO:0008152;GO:0009987;GO:0019538;GO:0043170;GO:0044237;GO:0044238;GO:0044260;GO:0044267		GO:0005737;GO:0044424;GO:0044464		58.428	0	32.045	53235668	38786332	30008334	20964666	3.79243	1.31912	0.138742	2.05225	0.251005	3.59593	0.402846	2.56627	0.264104	0.913593	0.112264	1.58139	0.151841	Q9KNK2	>sp|Q9KNK2|HSLO_VIBCH 33 kDa chaperonin OS=Vibrio cholerae serotype O1 (strain ATCC 39315 / El Tor Inaba N16961) GN=hslO PE=3 SV=2
7.58982	7.69621	7.64953	7.65271	7.73214	7.69209	7.56706	7.54388	7.56743	7.54435	7.45564	7.51901	+			+	+	+		cellular macromolecule metabolic process;cellular metabolic process;cellular nitrogen compound metabolic process;cellular process;cellular response to stimulus;cellular response to stress;DNA metabolic process;DNA repair;macromolecule metabolic process;metabolic process;nitrogen compound metabolic process;nucleic acid metabolic process;nucleobase-containing compound metabolic process;primary meta…	catalytic activity;hydrolase activity		Purine metabolism	GO:0006139;GO:0006259;GO:0006281;GO:0006807;GO:0006950;GO:0006974;GO:0008152;GO:0009987;GO:0033554;GO:0034641;GO:0043170;GO:0044237;GO:0044238;GO:0044260;GO:0050896;GO:0051716;GO:0090304	GO:0003824;GO:0016787		ko00230	117.04	0	23.166	44397000	49376668	36274000	32204334	2.66604	0.542284	-0.0471274	1.26653	0.0857277	1.57394	0.13885	2.22162	0.185977	2.26956	0.132855	0.90081	0.053122	Q9KNL1	>tr|Q9KNL1|Q9KNL1_VIBCH MutT/nudix family protein OS=Vibrio cholerae serotype O1 (strain ATCC 39315 / El Tor Inaba N16961) GN=VC_2721 PE=3 SV=1
7.74374	7.74803	7.73036	7.61922	7.66005	7.63735	7.92132	7.85076	8.10636	7.7737	7.85884	7.88016	+	+	+	+	+	+		biosynthetic process;cellular biosynthetic process;cellular metabolic process;cellular process;cofactor biosynthetic process;cofactor metabolic process;iron-sulfur cluster assembly;macromolecule metabolic process;metabolic process;metallo-sulfur cluster assembly;primary metabolic process;protein maturation;protein metabolic process	4 iron, 4 sulfur cluster binding;binding;cation binding;ion binding;iron ion binding;iron-sulfur cluster binding;metal cluster binding;metal ion binding;transition metal ion binding			GO:0008152;GO:0009058;GO:0009987;GO:0016226;GO:0019538;GO:0031163;GO:0043170;GO:0044237;GO:0044238;GO:0044249;GO:0051186;GO:0051188;GO:0051604	GO:0005488;GO:0005506;GO:0043167;GO:0043169;GO:0046872;GO:0046914;GO:0051536;GO:0051539;GO:0051540			162.78	0	21.106	55052000	43570668	94032336	69174664	2.44064	2.84932	0.101836	1.33945	-0.21877	1.37241	-0.096858	2.34134	-0.198694	1.84835	-0.320605	0.667185	0.121912	Q9KNL2	>sp|Q9KNL2|NFUA_VIBCH Fe/S biogenesis protein NfuA OS=Vibrio cholerae serotype O1 (strain ATCC 39315 / El Tor Inaba N16961) GN=nfuA PE=3 SV=1
6.78645	6.93464	6.83829	6.90021	6.96097	6.79133	6.92092	6.82852	6.72289	7.15561	7.10133	7.07383	+			+	+		+	cellular macromolecule metabolic process;cellular metabolic process;cellular nitrogen compound metabolic process;cellular process;cellular response to stimulus;cellular response to stress;DNA metabolic process;DNA repair;macromolecule metabolic process;metabolic process;nitrogen compound metabolic process;nucleic acid metabolic process;nucleobase-containing compound metabolic process;primary meta…	binding;catalytic activity;DNA binding;hydrolase activity;hydrolase activity, acting on ester bonds;nucleic acid binding;RNA binding			GO:0006139;GO:0006259;GO:0006281;GO:0006807;GO:0006950;GO:0006974;GO:0008152;GO:0009987;GO:0033554;GO:0034641;GO:0043170;GO:0044237;GO:0044238;GO:0044260;GO:0050896;GO:0051716;GO:0090304	GO:0003676;GO:0003677;GO:0003723;GO:0003824;GO:0005488;GO:0016787;GO:0016788			25.038	0	84.823	7.20327e+06	7757500	6.78543e+06	12930000	2.11487	0.178923	-0.0310413	0.150663	0.029017	2.18052	-0.257129	1.8284	-0.226087	0.325921	0.0600583	2.00244	-0.286146	Q9KNL6	>tr|Q9KNL6|Q9KNL6_VIBCH Uncharacterized protein OS=Vibrio cholerae serotype O1 (strain ATCC 39315 / El Tor Inaba N16961) GN=VC_2716 PE=4 SV=1
6.86006	6.80292	6.85864	6.33341	6.41642	6.20162	7.10164	6.96273	6.68979	NaN	6.81756	6.63997	+	+			+	+		biosynthetic process;cellular biosynthetic process;cellular macromolecule biosynthetic process;cellular macromolecule metabolic process;cellular metabolic process;cellular nitrogen compound metabolic process;cellular process;macromolecule biosynthetic process;macromolecule metabolic process;metabolic process;nitrogen compound metabolic process;nucleic acid metabolic process;nucleobase-containing …	binding;catalytic activity;DNA binding;DNA-directed RNA polymerase activity;nucleic acid binding;nucleotidyltransferase activity;RNA polymerase activity;transferase activity;transferase activity, transferring phosphorus-containing groups	cell part;intracellular part;macromolecular complex;protein complex;RNA polymerase complex	Purine metabolism;Pyrimidine metabolism;RNA polymerase	GO:0006139;GO:0006351;GO:0006807;GO:0008152;GO:0009058;GO:0009059;GO:0009987;GO:0016070;GO:0032774;GO:0034641;GO:0034645;GO:0043170;GO:0044237;GO:0044238;GO:0044249;GO:0044260;GO:0090304	GO:0003676;GO:0003677;GO:0003824;GO:0003899;GO:0005488;GO:0016740;GO:0016772;GO:0016779;GO:0034062	GO:0030880;GO:0032991;GO:0043234;GO:0044424;GO:0044464	ko00230;ko00240;ko03020	16.17	0	10.054	6939700	2118100	8903333	3644900	2.38174	2.88104	0.523389	0.251021	-0.0775161	0.675619	0.111776	1.53633	-0.411613	1.93636	-0.600905	0.461212	0.189292	Q9KNM3	>sp|Q9KNM3|RPOZ_VIBCH DNA-directed RNA polymerase subunit omega OS=Vibrio cholerae serotype O1 (strain ATCC 39315 / El Tor Inaba N16961) GN=rpoZ PE=3 SV=1
6.75031	6.79021	6.84458	6.55908	6.68838	6.65333	6.68199	6.84288	6.67792	6.89796	6.81543	6.79297	+	+			+			biological regulation;biosynthetic process;cellular biosynthetic process;cellular macromolecule biosynthetic process;cellular macromolecule metabolic process;cellular metabolic process;cellular nitrogen compound metabolic process;cellular process;cellular response to stimulus;intracellular signal transduction;macromolecule biosynthetic process;macromolecule metabolic process;metabolic process;nit…	binding;DNA binding;molecular transducer activity;nucleic acid binding;nucleic acid binding transcription factor activity;sequence-specific DNA binding;sequence-specific DNA binding transcription factor activity;signal transducer activity;two-component response regulator activity	cell part;intracellular		GO:0006139;GO:0006351;GO:0006807;GO:0007165;GO:0008152;GO:0009058;GO:0009059;GO:0009987;GO:0016070;GO:0032774;GO:0034641;GO:0034645;GO:0035556;GO:0043170;GO:0044237;GO:0044238;GO:0044249;GO:0044260;GO:0050789;GO:0050794;GO:0050896;GO:0051716;GO:0065007;GO:0090304	GO:0000156;GO:0001071;GO:0003676;GO:0003677;GO:0003700;GO:0004871;GO:0005488;GO:0043565;GO:0060089	GO:0005622;GO:0044464		20.998	0	22.728	6.26267e+06	4.33463e+06	5.51203e+06	6884000	1.50765	1.56949	0.161435	0.426944	0.0607688	0.408341	-0.0404181	1.80295	-0.201853	0.687319	-0.100667	0.736233	-0.101187	Q9KNN0	>tr|Q9KNN0|Q9KNN0_VIBCH Transcriptional regulator, LuxR family OS=Vibrio cholerae serotype O1 (strain ATCC 39315 / El Tor Inaba N16961) GN=VC_2702 PE=4 SV=1
9.24927	9.23464	9.24027	9.15088	9.1211	9.21413	9.11995	9.14588	9.22868	9.09072	9.04206	9.08679	+	+		+	+			acetyl-CoA catabolic process;acetyl-CoA metabolic process;amine metabolic process;aspartate family amino acid metabolic process;aspartate metabolic process;carboxylic acid metabolic process;catabolic process;cellular amine metabolic process;cellular amino acid metabolic process;cellular catabolic process;cellular ketone metabolic process;cellular metabolic process;cellular nitrogen compound metab…	ammonia-lyase activity;aspartate ammonia-lyase activity;carbon-nitrogen lyase activity;catalytic activity;lyase activity		Alanine, aspartate and glutamate metabolism;Nitrogen metabolism	GO:0006082;GO:0006084;GO:0006099;GO:0006520;GO:0006531;GO:0006732;GO:0006807;GO:0008152;GO:0009056;GO:0009066;GO:0009109;GO:0009308;GO:0009987;GO:0019752;GO:0034641;GO:0042180;GO:0043436;GO:0044106;GO:0044237;GO:0044238;GO:0044248;GO:0044281;GO:0046356;GO:0051186;GO:0051187	GO:0003824;GO:0008797;GO:0016829;GO:0016840;GO:0016841		ko00250;ko00910	323.31	0	52.804	1743566592	1458099968	1470133376	1185066624	2.22484	1.33752	0.0793606	1.08863	0.0765597	3.31617	0.168207	1.31834	0.0888468	0.021864	-0.00280094	1.1865	0.0916478	Q9KNN3	>tr|Q9KNN3|Q9KNN3_VIBCH Aspartate ammonia-lyase OS=Vibrio cholerae serotype O1 (strain ATCC 39315 / El Tor Inaba N16961) GN=VC_2698 PE=3 SV=1
8.11194	8.19706	8.19326	8.14063	8.31854	8.24284	8.70273	8.61595	8.72374	8.52836	8.57719	8.55277	+		+	+	+	+	+	cellular metabolic process;cellular process;metabolic process;reactive oxygen species metabolic process;superoxide metabolic process	antioxidant activity;binding;catalytic activity;cation binding;ion binding;metal ion binding;oxidoreductase activity;oxidoreductase activity, acting on superoxide radicals as acceptor;superoxide dismutase activity		Huntington's disease;Peroxisome	GO:0006801;GO:0008152;GO:0009987;GO:0044237;GO:0072593	GO:0003824;GO:0004784;GO:0005488;GO:0016209;GO:0016491;GO:0016721;GO:0043167;GO:0043169;GO:0046872		ko04146;ko05016	61.728	0	25.349	147623328	173796672	482233344	357463328	4.86138	0.496306	-0.0665862	3.5451	-0.513389	3.61084	-0.385355	2.40157	-0.318769	2.72773	-0.446802	1.63074	0.128034	Q9KNN7	>tr|Q9KNN7|Q9KNN7_VIBCH Superoxide dismutase OS=Vibrio cholerae serotype O1 (strain ATCC 39315 / El Tor Inaba N16961) GN=VC_2694 PE=3 SV=1
7.22339	7.24733	7.24729	6.91687	7.06978	6.90953	7.17164	7.09854	7.20257	7.03818	7.26262	7.26198	+	+				+		asexual reproduction;barrier septum formation;cellular component assembly;cellular component assembly at cellular level;cellular component organization;cellular component organization at cellular level;cellular component organization or biogenesis;cellular component organization or biogenesis at cellular level;cellular process;cytokinesis;cytokinesis by binary fission;cytokinetic process;reproduc…		cell part;cytoplasm;intracellular part		GO:0000003;GO:0000910;GO:0000917;GO:0009987;GO:0016043;GO:0019954;GO:0022607;GO:0032505;GO:0032506;GO:0043093;GO:0071840;GO:0071841;GO:0071842;GO:0071844		GO:0005737;GO:0044424;GO:0044464		29.909	0	9.4205	17357334	9373467	14445667	15835333	1.74381	2.18133	0.273945	1.20609	0.0817548	0.276671	0.0517456	1.14633	-0.222199	1.4696	-0.19219	0.137129	-0.0300093	Q9KNP5	>sp|Q9KNP5|ZAPB_VIBCH Cell division protein ZapB OS=Vibrio cholerae serotype O1 (strain ATCC 39315 / El Tor Inaba N16961) GN=zapB PE=3 SV=1
7.54103	7.47875	7.49538	7.55607	7.69447	7.68962	7.31057	7.32064	7.25638	7.30782	7.37436	7.34298	+	+	+	+	+	+		amine biosynthetic process;amine metabolic process;aspartate family amino acid biosynthetic process;aspartate family amino acid metabolic process;biosynthetic process;carboxylic acid biosynthetic process;carboxylic acid metabolic process;cellular amine metabolic process;cellular amino acid biosynthetic process;cellular amino acid metabolic process;cellular aromatic compound metabolic process;cell…	catalytic activity;methylenetetrahydrofolate reductase (NADPH) activity;oxidoreductase activity;oxidoreductase activity, acting on the CH-NH group of donors;oxidoreductase activity, acting on the CH-NH group of donors, NAD or NADP as acceptor	cell part;cytoplasmic part;cytosol;intracellular part	Carbon fixation pathways in prokaryotes;Methane metabolism;One carbon pool by folate	GO:0000096;GO:0000097;GO:0006082;GO:0006520;GO:0006555;GO:0006725;GO:0006730;GO:0006732;GO:0006760;GO:0006790;GO:0006807;GO:0008152;GO:0008652;GO:0009058;GO:0009066;GO:0009067;GO:0009086;GO:0009308;GO:0009309;GO:0009987;GO:0016053;GO:0019752;GO:0034641;GO:0035999;GO:0042180;GO:0042558;GO:0043436;GO:0044106;GO:0044237;GO:0044238;GO:0044249;GO:0044271;GO:0044272;GO:0044281;GO:0044283;GO:0046394;GO:…	GO:0003824;GO:0004489;GO:0016491;GO:0016645;GO:0016646	GO:0005829;GO:0044424;GO:0044444;GO:0044464	ko00670;ko00680;ko00720	109.63	0	33.956	32052334	44800332	19804666	22007334	4.10118	1.35105	-0.141668	2.80769	0.20919	2.43828	0.163335	2.46135	0.305004	2.67809	0.350858	0.761306	-0.0458546	Q9KNP6	>tr|Q9KNP6|Q9KNP6_VIBCH Methylenetetrahydrofolate reductase OS=Vibrio cholerae serotype O1 (strain ATCC 39315 / El Tor Inaba N16961) GN=VC_2685 PE=3 SV=1
8.57375	8.52762	8.54023	8.40185	8.42413	8.39756	8.40463	8.29717	8.30049	8.28463	8.31431	8.29864	+	+	+	+	+			carboxylic acid metabolic process;cellular ketone metabolic process;cellular metabolic process;cellular process;dicarboxylic acid metabolic process;malate metabolic process;metabolic process;organic acid metabolic process;oxoacid metabolic process;small molecule metabolic process	binding;catalytic activity;cation binding;coenzyme binding;cofactor binding;ion binding;malate dehydrogenase (oxaloacetate-decarboxylating) activity;malate dehydrogenase activity;malic enzyme activity;metal ion binding;NAD binding;nucleotide binding;oxidoreductase activity;oxidoreductase activity, acting on CH-OH group of donors;oxidoreductase activity, acting on the CH-OH group of donors, NAD or…		Carbon fixation in photosynthetic organisms;Pyruvate metabolism	GO:0006082;GO:0006108;GO:0008152;GO:0009987;GO:0019752;GO:0042180;GO:0043436;GO:0043648;GO:0044237;GO:0044281	GO:0000166;GO:0003824;GO:0004470;GO:0005488;GO:0016491;GO:0016614;GO:0016615;GO:0016616;GO:0016619;GO:0043167;GO:0043169;GO:0046872;GO:0048037;GO:0050662;GO:0051287		ko00620;ko00710	207.81	0	46.112	352890016	255860000	217286672	199233328	4.00937	3.01471	0.139355	2.30933	0.213105	3.9721	0.248007	3.09962	0.108652	0.952774	0.0737502	0.408018	0.0349023	Q9KNQ0	>tr|Q9KNQ0|Q9KNQ0_VIBCH Malate oxidoreductase, putative OS=Vibrio cholerae serotype O1 (strain ATCC 39315 / El Tor Inaba N16961) GN=VC_2681 PE=4 SV=1
7.78292	7.74062	7.80622	7.87459	7.92983	7.91324	7.87852	7.85159	7.72657	7.74079	7.77079	7.75394	+	+			+			ATP catabolic process;ATP metabolic process;catabolic process;cellular catabolic process;cellular macromolecule metabolic process;cellular metabolic process;cellular nitrogen compound catabolic process;cellular nitrogen compound metabolic process;cellular process;cellular protein metabolic process;heterocycle catabolic process;heterocycle metabolic process;macromolecule metabolic process;metaboli…	adenyl nucleotide binding;adenyl ribonucleotide binding;ATP binding;ATPase activity;binding;catalytic activity;hydrolase activity;hydrolase activity, acting on acid anhydrides;hydrolase activity, acting on acid anhydrides, in phosphorus-containing anhydrides;nucleoside-triphosphatase activity;nucleotide binding;peptidase activity;peptidase activity, acting on L-amino acid peptides;purine nucleoti…	cell part;cytoplasmic part;HslUV protease complex;intracellular part;macromolecular complex;protein complex		GO:0006139;GO:0006163;GO:0006195;GO:0006200;GO:0006508;GO:0006753;GO:0006807;GO:0008152;GO:0009056;GO:0009117;GO:0009141;GO:0009143;GO:0009144;GO:0009146;GO:0009150;GO:0009154;GO:0009166;GO:0009199;GO:0009203;GO:0009205;GO:0009207;GO:0009259;GO:0009261;GO:0009987;GO:0019538;GO:0034641;GO:0034655;GO:0043170;GO:0043335;GO:0044237;GO:0044238;GO:0044248;GO:0044260;GO:0044267;GO:0044270;GO:0044281;GO:…	GO:0000166;GO:0003824;GO:0005488;GO:0005524;GO:0008233;GO:0016462;GO:0016787;GO:0016817;GO:0016818;GO:0016887;GO:0017076;GO:0017111;GO:0030554;GO:0032553;GO:0032555;GO:0032559;GO:0035639;GO:0070011	GO:0009376;GO:0032991;GO:0043234;GO:0044424;GO:0044444;GO:0044464		250.45	0	49.9	59900668	80630336	66645000	56930668	1.74111	2.16354	-0.129298	0.34668	-0.0423053	0.435434	0.0214165	2.90582	0.150714	0.811771	0.0869923	0.599	0.0637218	Q9KNQ7	>sp|Q9KNQ7|HSLU_VIBCH ATP-dependent protease ATPase subunit HslU OS=Vibrio cholerae serotype O1 (strain ATCC 39315 / El Tor Inaba N16961) GN=hslU PE=3 SV=1
8.06371	8.0335	7.99485	7.9655	8.0943	7.9384	8.17327	8.08207	8.19075	8.08339	8.13529	8.16367	+		+	+				biological regulation;regulation of biological process;regulation of cellular metabolic process;regulation of cellular process;regulation of macromolecule metabolic process;regulation of metabolic process;regulation of nitrogen compound metabolic process;regulation of nucleobase-containing compound metabolic process;regulation of primary metabolic process;regulation of RNA metabolic process	enzyme inhibitor activity;enzyme regulator activity;ribonuclease inhibitor activity	cell part;cytoplasm;intracellular part		GO:0019219;GO:0019222;GO:0031323;GO:0050789;GO:0050794;GO:0051171;GO:0051252;GO:0060255;GO:0065007;GO:0080090	GO:0004857;GO:0008428;GO:0030234	GO:0005737;GO:0044424;GO:0044464		40.867	0	18.444	107547000	101129664	141660000	134496672	1.47236	0.236431	0.0312893	1.40479	-0.11801	1.45797	-0.0967642	1.1251	-0.128054	1.19514	-0.149299	0.199059	0.021246	Q9KNQ9	>sp|Q9KNQ9|RRAA_VIBCH Regulator of ribonuclease activity A OS=Vibrio cholerae serotype O1 (strain ATCC 39315 / El Tor Inaba N16961) GN=rraA PE=3 SV=1
8.71305	8.74859	8.82631	8.80127	8.83662	8.81402	7.96504	7.81183	8.17566	7.52682	7.67065	7.65908	+		+	+	+	+	+	cellular macromolecule metabolic process;cellular metabolic process;cellular process;cellular protein metabolic process;macromolecule metabolic process;metabolic process;primary metabolic process;protein folding;protein metabolic process	adenyl nucleotide binding;adenyl ribonucleotide binding;ATP binding;binding;nucleotide binding;purine nucleotide binding;purine ribonucleoside triphosphate binding;purine ribonucleotide binding;ribonucleotide binding	cell part;cytoplasm;intracellular part		GO:0006457;GO:0008152;GO:0009987;GO:0019538;GO:0043170;GO:0044237;GO:0044238;GO:0044260;GO:0044267	GO:0000166;GO:0005488;GO:0005524;GO:0017076;GO:0030554;GO:0032553;GO:0032555;GO:0032559;GO:0035639	GO:0005737;GO:0044424;GO:0044464		131.18	0	10.295	582453312	656980032	102318000	42030668	5.89133	0.713456	-0.0546541	2.66755	0.778475	4.43949	1.1438	4.84215	1.19846	2.84945	0.833129	1.47187	0.365329	Q9KNR6	>sp|Q9KNR6|CH101_VIBCH 10 kDa chaperonin 1 OS=Vibrio cholerae serotype O1 (strain ATCC 39315 / El Tor Inaba N16961) GN=groS1 PE=3 SV=1
9.70488	9.7096	9.76005	9.73029	9.70258	9.72992	9.21714	9.2274	9.29409	9.20561	9.23679	9.2804	+		+	+	+	+		cellular macromolecule metabolic process;cellular metabolic process;cellular process;cellular protein metabolic process;macromolecule metabolic process;metabolic process;primary metabolic process;protein folding;protein metabolic process;protein refolding	adenyl nucleotide binding;adenyl ribonucleotide binding;ATP binding;binding;nucleotide binding;purine nucleotide binding;purine ribonucleoside triphosphate binding;purine ribonucleotide binding;ribonucleotide binding	cell part;cytoplasm;intracellular part	ko05152;RNA degradation;Type I diabetes mellitus	GO:0006457;GO:0008152;GO:0009987;GO:0019538;GO:0042026;GO:0043170;GO:0044237;GO:0044238;GO:0044260;GO:0044267	GO:0000166;GO:0005488;GO:0005524;GO:0017076;GO:0030554;GO:0032553;GO:0032555;GO:0032559;GO:0035639	GO:0005737;GO:0044424;GO:0044464	ko03018;ko04940;ko05152	323.31	0	57.153	5315833344	5261633024	1768366720	1745900032	7.23047	0.0687621	0.00391642	4.05072	0.478634	4.18396	0.483912	4.46581	0.479996	4.28901	0.474717	0.0561962	0.00527859	Q9KNR7	>sp|Q9KNR7|CH601_VIBCH 60 kDa chaperonin 1 OS=Vibrio cholerae serotype O1 (strain ATCC 39315 / El Tor Inaba N16961) GN=groL1 PE=3 SV=1
7.69608	7.73389	7.6882	7.32474	7.42609	7.37711	7.79042	7.80039	7.80019	7.6391	7.74465	7.74549	+	+	+		+	+		acetyl-CoA catabolic process;acetyl-CoA metabolic process;anaerobic respiration;catabolic process;cellular catabolic process;cellular metabolic process;cellular process;cellular respiration;coenzyme catabolic process;coenzyme metabolic process;cofactor catabolic process;cofactor metabolic process;energy derivation by oxidation of organic compounds;generation of precursor metabolites and energy;me…	2 iron, 2 sulfur cluster binding;binding;catalytic activity;electron carrier activity;iron-sulfur cluster binding;metal cluster binding;oxidoreductase activity;oxidoreductase activity, acting on the CH-CH group of donors;succinate dehydrogenase activity		Butanoate metabolism;Carbon fixation pathways in prokaryotes;Citrate cycle (TCA cycle);Oxidative phosphorylation;Toluene degradation;Two-component system	GO:0006084;GO:0006091;GO:0006099;GO:0006732;GO:0008152;GO:0009056;GO:0009061;GO:0009109;GO:0009987;GO:0015980;GO:0044237;GO:0044248;GO:0045333;GO:0046356;GO:0051186;GO:0051187;GO:0055114	GO:0000104;GO:0003824;GO:0005488;GO:0009055;GO:0016491;GO:0016627;GO:0051536;GO:0051537;GO:0051540		ko00020;ko00190;ko00623;ko00650;ko00720;ko02020	75.143	0	27.989	50876332	23875000	62664668	51586668	5.08876	3.27717	0.330077	2.48391	-0.0909441	0.0327656	-0.00369263	2.72225	-0.33377	3.85688	-0.421021	1.1565	0.0872515	Q9KNS4	>tr|Q9KNS4|Q9KNS4_VIBCH Succinate dehydrogenase iron-sulfur subunit OS=Vibrio cholerae serotype O1 (strain ATCC 39315 / El Tor Inaba N16961) GN=VC_2657 PE=3 SV=1
8.6693	8.67732	8.61824	8.45013	8.46265	8.40587	8.71888	8.75826	8.7031	8.65412	8.60781	8.73442	+	+	+		+	+		anaerobic respiration;cellular metabolic process;cellular process;cellular respiration;electron transport chain;energy derivation by oxidation of organic compounds;generation of precursor metabolites and energy;metabolic process;oxidation-reduction process	binding;catalytic activity;coenzyme binding;cofactor binding;flavin adenine dinucleotide binding;oxidoreductase activity;oxidoreductase activity, acting on the CH-CH group of donors;succinate dehydrogenase activity		Butanoate metabolism;Carbon fixation pathways in prokaryotes;Citrate cycle (TCA cycle);Oxidative phosphorylation;Toluene degradation;Two-component system	GO:0006091;GO:0008152;GO:0009061;GO:0009987;GO:0015980;GO:0022900;GO:0044237;GO:0045333;GO:0055114	GO:0000104;GO:0003824;GO:0005488;GO:0016491;GO:0016627;GO:0048037;GO:0050660;GO:0050662		ko00020;ko00190;ko00623;ko00650;ko00720;ko02020	323.31	0	66.405	452616672	275566656	533789984	466266656	3.84871	2.98272	0.215402	1.35688	-0.0717929	0.0903658	-0.0104974	2.28387	-0.225899	3.56911	-0.287195	0.689602	0.0612955	Q9KNS5	>tr|Q9KNS5|Q9KNS5_VIBCH Fumarate reductase flavoprotein subunit OS=Vibrio cholerae serotype O1 (strain ATCC 39315 / El Tor Inaba N16961) GN=VC_2656 PE=3 SV=1
7.86188	7.95954	7.99354	7.85695	7.77674	7.77968	7.98772	7.98917	8.10694	8.13219	8.13232	8.10226	+	+		+	+	+		cellular component assembly;cellular component organization;cellular component organization or biogenesis;cellular macromolecule metabolic process;cellular metabolic process;cellular process;cellular protein metabolic process;establishment of localization;establishment of localization in cell;establishment of protein localization;macromolecular complex assembly;macromolecular complex subunit orga…		cell part;cytoplasm;intracellular part	Bacterial secretion system;Protein export	GO:0006457;GO:0006461;GO:0006810;GO:0008152;GO:0009306;GO:0009987;GO:0015031;GO:0016043;GO:0019538;GO:0022607;GO:0032940;GO:0043170;GO:0043933;GO:0044237;GO:0044238;GO:0044260;GO:0044267;GO:0045184;GO:0046903;GO:0051234;GO:0051259;GO:0051262;GO:0051649;GO:0065003;GO:0071822;GO:0071840		GO:0005737;GO:0044424;GO:0044464	ko03060;ko03070	205.04	0	17.035	87461336	63984332	107557000	132583336	3.24996	1.32212	0.133861	0.735897	-0.089629	1.97185	-0.183944	3.45806	-0.317805	2.03496	-0.22349	1.0883	-0.0943149	Q9KNS8	>sp|Q9KNS8|SECB_VIBCH Protein-export protein SecB OS=Vibrio cholerae serotype O1 (strain ATCC 39315 / El Tor Inaba N16961) GN=secB PE=3 SV=1
7.58345	7.56571	7.56718	7.52915	7.53007	7.51178	7.1637	7.22575	7.09128	7.19109	7.15232	7.2237	+	+	+	+	+	+		amine biosynthetic process;amine metabolic process;biosynthetic process;carboxylic acid biosynthetic process;carboxylic acid metabolic process;cellular amine metabolic process;cellular amino acid biosynthetic process;cellular amino acid metabolic process;cellular biosynthetic process;cellular ketone metabolic process;cellular metabolic process;cellular nitrogen compound biosynthetic process;cellu…	acetyltransferase activity;catalytic activity;O-acetyltransferase activity;O-acyltransferase activity;serine O-acetyltransferase activity;serine O-acyltransferase activity;transferase activity;transferase activity, transferring acyl groups;transferase activity, transferring acyl groups other than amino-acyl groups	cell part;cytoplasm;intracellular part	Cysteine and methionine metabolism;Sulfur metabolism	GO:0000096;GO:0000097;GO:0006082;GO:0006520;GO:0006534;GO:0006535;GO:0006563;GO:0006790;GO:0006807;GO:0008152;GO:0008652;GO:0009058;GO:0009069;GO:0009070;GO:0009308;GO:0009309;GO:0009987;GO:0016053;GO:0019344;GO:0019752;GO:0034641;GO:0042180;GO:0043436;GO:0044106;GO:0044237;GO:0044238;GO:0044249;GO:0044271;GO:0044272;GO:0044281;GO:0044283;GO:0046394	GO:0003824;GO:0008374;GO:0009001;GO:0016407;GO:0016412;GO:0016413;GO:0016740;GO:0016746;GO:0016747	GO:0005737;GO:0044424;GO:0044464	ko00270;ko00920	75.903	0	29.278	37341000	33400000	14578000	15488667	5.84711	2.38068	0.0484457	3.33053	0.411869	4.24222	0.383074	4.00433	0.334629	3.11866	0.363423	0.260816	-0.0287946	Q9KNT2	>tr|Q9KNT2|Q9KNT2_VIBCH Serine acetyltransferase OS=Vibrio cholerae serotype O1 (strain ATCC 39315 / El Tor Inaba N16961) GN=VC_2649 PE=1 SV=1
7.78897	7.74598	7.80316	7.99765	7.91591	7.85378	8.07221	8.06789	7.94587	8.00208	7.95942	7.96216	+	+	+	+				acetyl-CoA catabolic process;acetyl-CoA metabolic process;carbon fixation;carboxylic acid metabolic process;catabolic process;cellular catabolic process;cellular ketone metabolic process;cellular metabolic process;cellular process;coenzyme catabolic process;coenzyme metabolic process;cofactor catabolic process;cofactor metabolic process;dicarboxylic acid metabolic process;metabolic process;organi…	binding;carbon-carbon lyase activity;carboxy-lyase activity;catalytic activity;cation binding;ion binding;lyase activity;magnesium ion binding;metal ion binding;phosphoenolpyruvate carboxykinase activity;phosphoenolpyruvate carboxylase activity		Carbon fixation in photosynthetic organisms;Carbon fixation pathways in prokaryotes;Methane metabolism;Pyruvate metabolism	GO:0006082;GO:0006084;GO:0006099;GO:0006107;GO:0006732;GO:0008152;GO:0009056;GO:0009109;GO:0009987;GO:0015977;GO:0019752;GO:0042180;GO:0043436;GO:0043648;GO:0044237;GO:0044248;GO:0044281;GO:0046356;GO:0051186;GO:0051187;GO:0071704	GO:0000287;GO:0003824;GO:0004611;GO:0005488;GO:0008964;GO:0016829;GO:0016830;GO:0016831;GO:0043167;GO:0043169;GO:0046872		ko00620;ko00680;ko00710;ko00720	240.87	0	98.316	60261668	84423336	107763664	94404664	2.5642	1.47237	-0.143078	2.29034	-0.249289	3.04719	-0.195184	0.521793	-0.0521057	0.839036	-0.106211	0.548383	0.054105	Q9KNT4	>sp|Q9KNT4|CAPP_VIBCH Phosphoenolpyruvate carboxylase OS=Vibrio cholerae serotype O1 (strain ATCC 39315 / El Tor Inaba N16961) GN=ppc PE=3 SV=2
6.92102	6.99328	6.98651	6.95585	6.98482	6.92779	7.15476	7.03205	7.17499	7.10799	7.03523	7.13376	+		+	+	+	+		amine biosynthetic process;amine metabolic process;arginine biosynthetic process;arginine metabolic process;biosynthetic process;carboxylic acid biosynthetic process;carboxylic acid metabolic process;cellular amine metabolic process;cellular amino acid biosynthetic process;cellular amino acid metabolic process;cellular biosynthetic process;cellular ketone metabolic process;cellular metabolic proc…	acetylornithine deacetylase activity;binding;catalytic activity;cation binding;cobalt ion binding;deacetylase activity;hydrolase activity;hydrolase activity, acting on carbon-nitrogen (but not peptide) bonds;hydrolase activity, acting on carbon-nitrogen (but not peptide) bonds, in linear amides;ion binding;metal ion binding;metallopeptidase activity;peptidase activity;peptidase activity, acting o…	cell part;cytoplasm;intracellular part	Arginine and proline metabolism	GO:0006082;GO:0006508;GO:0006520;GO:0006525;GO:0006526;GO:0006807;GO:0008152;GO:0008652;GO:0009058;GO:0009064;GO:0009084;GO:0009308;GO:0009309;GO:0009987;GO:0016053;GO:0019538;GO:0019752;GO:0034641;GO:0042180;GO:0043170;GO:0043436;GO:0044106;GO:0044237;GO:0044238;GO:0044249;GO:0044271;GO:0044281;GO:0044283;GO:0046394	GO:0003824;GO:0005488;GO:0008233;GO:0008237;GO:0008270;GO:0008777;GO:0016787;GO:0016810;GO:0016811;GO:0019213;GO:0043167;GO:0043169;GO:0046872;GO:0046914;GO:0050897;GO:0070011	GO:0005737;GO:0044424;GO:0044464	ko00330	18.112	0	41.963	9292633	9052733	13336333	12425000	2.03443	0.14101	0.0107826	1.42325	-0.153663	1.54394	-0.125389	1.80334	-0.136172	1.58613	-0.164445	0.203933	0.0282736	Q9KNT5	>sp|Q9KNT5|ARGE_VIBCH Acetylornithine deacetylase OS=Vibrio cholerae serotype O1 (strain ATCC 39315 / El Tor Inaba N16961) GN=argE PE=3 SV=1
6.24724	NaN	6.20793	NaN	6.12264	6.4019	6.56605	6.50915	6.24289	7.01439	7.23507	6.84147	+			+	+		+	amine metabolic process;aminoglycan biosynthetic process;aminoglycan metabolic process;biological regulation;biosynthetic process;carbohydrate biosynthetic process;carbohydrate metabolic process;cell wall macromolecule biosynthetic process;cell wall macromolecule metabolic process;cell wall organization or biogenesis;cellular biosynthetic process;cellular cell wall macromolecule metabolic process…	binding;carboxylic acid binding;catalytic activity;drug binding;hydrolase activity;penicillin binding;peptidase activity;transferase activity;transferase activity, transferring glycosyl groups;transferase activity, transferring pentosyl groups	cell part;integral to membrane;intrinsic to membrane;membrane;membrane part;plasma membrane	Peptidoglycan biosynthesis	GO:0000270;GO:0000271;GO:0005975;GO:0005976;GO:0006022;GO:0006023;GO:0006024;GO:0006807;GO:0008152;GO:0008360;GO:0009058;GO:0009059;GO:0009252;GO:0009308;GO:0009987;GO:0010382;GO:0016051;GO:0022603;GO:0022604;GO:0030203;GO:0034645;GO:0042221;GO:0043170;GO:0044036;GO:0044038;GO:0044237;GO:0044238;GO:0044249;GO:0044260;GO:0046677;GO:0050789;GO:0050793;GO:0050794;GO:0050896;GO:0051128;GO:0065007;GO:…	GO:0003824;GO:0005488;GO:0008144;GO:0008233;GO:0008658;GO:0016740;GO:0016757;GO:0016763;GO:0016787;GO:0031406	GO:0005886;GO:0016020;GO:0016021;GO:0031224;GO:0044425;GO:0044464	ko00550	55.36	0	91.986	1.12703e+06	1.28307e+06	2886900	11486900	2.25884	0.0816411	-0.034687	0.698384	-0.211778	1.91202	-0.802728	1.62573	-0.768041	0.440269	-0.177091	1.75799	-0.590949	Q9KNU5	>sp|Q9KNU5|PBPA_VIBCH Penicillin-binding protein 1A OS=Vibrio cholerae serotype O1 (strain ATCC 39315 / El Tor Inaba N16961) GN=mrcA PE=3 SV=2
7.87377	7.82508	7.85765	7.78577	7.80108	7.92966	7.79292	7.72711	7.76697	7.6651	7.71478	7.65598	+		+	+	+		+	alcohol catabolic process;alcohol metabolic process;carbohydrate catabolic process;carbohydrate metabolic process;catabolic process;cellular carbohydrate catabolic process;cellular carbohydrate metabolic process;cellular metabolic process;cellular nitrogen compound metabolic process;cellular process;coenzyme metabolic process;cofactor metabolic process;glucose catabolic process;glucose metabolic …	binding;catalytic activity;cation binding;ion binding;isomerase activity;metal ion binding;racemase and epimerase activity;racemase and epimerase activity, acting on carbohydrates and derivatives;ribulose-phosphate 3-epimerase activity		Carbon fixation in photosynthetic organisms;Pentose and glucuronate interconversions;Pentose phosphate pathway	GO:0005975;GO:0005996;GO:0006006;GO:0006007;GO:0006066;GO:0006098;GO:0006139;GO:0006732;GO:0006733;GO:0006739;GO:0006740;GO:0006753;GO:0006807;GO:0008152;GO:0009056;GO:0009117;GO:0009987;GO:0016052;GO:0019318;GO:0019320;GO:0019362;GO:0034641;GO:0044237;GO:0044238;GO:0044262;GO:0044275;GO:0044281;GO:0044282;GO:0046164;GO:0046365;GO:0046483;GO:0046496;GO:0051186;GO:0055086;GO:0055114;GO:0072524	GO:0003824;GO:0004750;GO:0005488;GO:0016853;GO:0016854;GO:0016857;GO:0043167;GO:0043169;GO:0046872		ko00030;ko00040;ko00710	43.084	0	25.752	71225336	69787664	57965668	47797000	2.15509	0.10001	0.0133265	1.70329	0.0898329	2.76665	0.173543	1.50742	0.160216	0.705663	0.0765065	1.46775	0.0837097	Q9KNV5	>tr|Q9KNV5|Q9KNV5_VIBCH Ribulose-phosphate 3-epimerase OS=Vibrio cholerae serotype O1 (strain ATCC 39315 / El Tor Inaba N16961) GN=VC_2625 PE=3 SV=1
8.2913	8.29172	8.26138	8.23631	8.19449	8.2655	8.11707	8.18512	8.10134	8.04879	8.07544	8.10785	+		+	+	+	+		amine metabolic process;amino acid activation;carboxylic acid metabolic process;cellular amine metabolic process;cellular amino acid metabolic process;cellular ketone metabolic process;cellular macromolecule metabolic process;cellular metabolic process;cellular nitrogen compound metabolic process;cellular process;macromolecule metabolic process;metabolic process;ncRNA metabolic process;nitrogen c…	adenyl nucleotide binding;adenyl ribonucleotide binding;aminoacyl-tRNA ligase activity;ATP binding;binding;catalytic activity;ligase activity;ligase activity, forming aminoacyl-tRNA and related compounds;ligase activity, forming carbon-oxygen bonds;nucleotide binding;purine nucleotide binding;purine ribonucleoside triphosphate binding;purine ribonucleotide binding;ribonucleotide binding;tryptopha…	cell part;cytoplasm;intracellular part	Aminoacyl-tRNA biosynthesis;Tryptophan metabolism	GO:0006082;GO:0006139;GO:0006399;GO:0006418;GO:0006436;GO:0006520;GO:0006807;GO:0008152;GO:0009308;GO:0009987;GO:0016070;GO:0019752;GO:0034641;GO:0034660;GO:0042180;GO:0043038;GO:0043039;GO:0043170;GO:0043436;GO:0044106;GO:0044237;GO:0044238;GO:0044260;GO:0044281;GO:0090304	GO:0000166;GO:0003824;GO:0004812;GO:0004830;GO:0005488;GO:0005524;GO:0016874;GO:0016875;GO:0016876;GO:0017076;GO:0030554;GO:0032553;GO:0032555;GO:0032559;GO:0035639	GO:0005737;GO:0044424;GO:0044464	ko00380;ko00970	197.87	0	37.432	191293328	171030000	136790000	119683336	3.56793	1.01054	0.0493698	2.22273	0.146962	3.30037	0.204109	2.35204	0.154739	1.3822	0.097592	0.860948	0.057147	Q9KNV7	>sp|Q9KNV7|SYW_VIBCH Tryptophan--tRNA ligase OS=Vibrio cholerae serotype O1 (strain ATCC 39315 / El Tor Inaba N16961) GN=trpS PE=1 SV=2
7.5164	7.61826	7.52841	7.45489	7.52793	7.46265	7.67381	7.73914	7.63189	7.93442	7.96461	7.91983	+		+	+	+	+	+									323.31	0	94.332	36040332	30414334	48292000	87100664	5.09015	0.85064	0.0725355	1.3295	-0.127257	3.42487	-0.38526	4.17144	-0.457796	2.16838	-0.199793	2.79701	-0.258003	Q9KNV9	>tr|Q9KNV9|Q9KNV9_VIBCH Extracellular nuclease-related protein OS=Vibrio cholerae serotype O1 (strain ATCC 39315 / El Tor Inaba N16961) GN=VC_2621 PE=4 SV=1
9.01127	8.96034	8.99047	9.16394	9.13319	9.21016	9.14223	9.17164	9.25312	9.1675	9.06703	9.19215	+	+	+	+				amine biosynthetic process;amine metabolic process;arginine biosynthetic process;arginine metabolic process;biosynthetic process;carboxylic acid biosynthetic process;carboxylic acid metabolic process;cellular amine metabolic process;cellular amino acid biosynthetic process;cellular amino acid metabolic process;cellular biosynthetic process;cellular ketone metabolic process;cellular metabolic proc…	binding;catalytic activity;cofactor binding;N2-acetyl-L-ornithine:2-oxoglutarate 5-aminotransferase activity;pyridoxal phosphate binding;transaminase activity;transferase activity;transferase activity, transferring nitrogenous groups;vitamin B6 binding;vitamin binding	cell part;cytoplasm;intracellular part	Arginine and proline metabolism;Lysine biosynthesis	GO:0006082;GO:0006520;GO:0006525;GO:0006526;GO:0006807;GO:0008152;GO:0008652;GO:0009058;GO:0009064;GO:0009084;GO:0009308;GO:0009309;GO:0009987;GO:0016053;GO:0019752;GO:0034641;GO:0042180;GO:0043436;GO:0044106;GO:0044237;GO:0044238;GO:0044249;GO:0044271;GO:0044281;GO:0044283;GO:0046394	GO:0003824;GO:0003992;GO:0005488;GO:0008483;GO:0016740;GO:0016769;GO:0019842;GO:0030170;GO:0048037;GO:0070279	GO:0005737;GO:0044424;GO:0044464	ko00300;ko00330	323.31	0	43.577	972440000	1479966592	1554433408	1398000000	2.38916	2.60672	-0.181732	2.28843	-0.201635	1.70962	-0.154864	0.238748	0.0268682	0.190487	-0.0199029	0.389403	0.046771	Q9KNW2	>sp|Q9KNW2|ARGD_VIBCH Acetylornithine aminotransferase OS=Vibrio cholerae serotype O1 (strain ATCC 39315 / El Tor Inaba N16961) GN=argD PE=3 SV=1
7.82269	7.84284	7.8642	8.13545	8.09356	8.14292	8.07033	8.12284	8.08275	8.14799	8.10812	8.11361	+	+	+	+				amine catabolic process;amine metabolic process;arginine catabolic process;arginine catabolic process to succinate;arginine metabolic process;carboxylic acid catabolic process;carboxylic acid metabolic process;catabolic process;cellular amine metabolic process;cellular amino acid catabolic process;cellular amino acid metabolic process;cellular catabolic process;cellular ketone metabolic process;c…	arginine N-succinyltransferase activity;catalytic activity;N-acyltransferase activity;N-succinyltransferase activity;succinyltransferase activity;transferase activity;transferase activity, transferring acyl groups;transferase activity, transferring acyl groups other than amino-acyl groups		Arginine and proline metabolism	GO:0006082;GO:0006105;GO:0006520;GO:0006525;GO:0006527;GO:0006807;GO:0008152;GO:0009056;GO:0009063;GO:0009064;GO:0009065;GO:0009308;GO:0009310;GO:0009987;GO:0016054;GO:0019545;GO:0019752;GO:0034641;GO:0042180;GO:0043436;GO:0043648;GO:0044106;GO:0044237;GO:0044238;GO:0044248;GO:0044281;GO:0044282;GO:0046395	GO:0003824;GO:0008791;GO:0016410;GO:0016740;GO:0016746;GO:0016747;GO:0016748;GO:0016749		ko00330	168.73	0	39.028	69754664	133203336	123753336	132923336	5.84637	3.87036	-0.280735	3.63071	-0.248731	4.06954	-0.279997	0.0123204	0.000738144	0.656455	0.0320044	0.707879	-0.0312662	Q9KNW3	>tr|Q9KNW3|Q9KNW3_VIBCH Arginine N-succinyltransferase OS=Vibrio cholerae serotype O1 (strain ATCC 39315 / El Tor Inaba N16961) GN=VC_2617 PE=4 SV=1
8.41227	8.38008	8.42859	8.72076	8.66738	8.71101	8.72458	8.73747	8.84275	8.73226	8.72146	8.75153	+	+	+	+				amine catabolic process;amine metabolic process;arginine catabolic process;arginine catabolic process to glutamate;arginine catabolic process to succinate;arginine metabolic process;carboxylic acid catabolic process;carboxylic acid metabolic process;catabolic process;cellular amine metabolic process;cellular amino acid catabolic process;cellular amino acid metabolic process;cellular catabolic pro…	catalytic activity;oxidoreductase activity;oxidoreductase activity, acting on the aldehyde or oxo group of donors;oxidoreductase activity, acting on the aldehyde or oxo group of donors, NAD or NADP as acceptor;succinylglutamate-semialdehyde dehydrogenase activity		Arginine and proline metabolism	GO:0006082;GO:0006105;GO:0006520;GO:0006525;GO:0006527;GO:0006536;GO:0006807;GO:0008152;GO:0009056;GO:0009063;GO:0009064;GO:0009065;GO:0009308;GO:0009310;GO:0009987;GO:0016054;GO:0019544;GO:0019545;GO:0019752;GO:0034641;GO:0042180;GO:0043436;GO:0043648;GO:0044106;GO:0044237;GO:0044238;GO:0044248;GO:0044281;GO:0044282;GO:0046395	GO:0003824;GO:0016491;GO:0016620;GO:0016903;GO:0043824		ko00330	323.31	0	52.193	255533328	501566656	590980032	543583360	5.0029	3.7549	-0.292733	3.07772	-0.361283	4.39789	-0.328105	0.885111	-0.0353721	0.77271	-0.0685498	0.359698	0.0331777	Q9KNW4	>sp|Q9KNW4|ASTD_VIBCH N-succinylglutamate 5-semialdehyde dehydrogenase OS=Vibrio cholerae serotype O1 (strain ATCC 39315 / El Tor Inaba N16961) GN=astD PE=3 SV=1
7.82915	7.93816	7.95373	7.67535	7.79911	7.80173	7.82941	7.9134	7.61069	8.08504	8.03826	7.96701	+				+			biosynthetic process;cellular biosynthetic process;cellular macromolecule biosynthetic process;cellular macromolecule metabolic process;cellular metabolic process;cellular nitrogen compound metabolic process;cellular process;macromolecule biosynthetic process;macromolecule metabolic process;metabolic process;nitrogen compound metabolic process;nucleic acid metabolic process;nucleobase-containing …	binding;DNA binding;nucleic acid binding;nucleic acid binding transcription factor activity;sequence-specific DNA binding transcription factor activity	cell part;intracellular	Two-component system;Vibrio cholerae pathogenic cycle	GO:0006139;GO:0006351;GO:0006807;GO:0008152;GO:0009058;GO:0009059;GO:0009987;GO:0016070;GO:0032774;GO:0034641;GO:0034645;GO:0043170;GO:0044237;GO:0044238;GO:0044249;GO:0044260;GO:0090304	GO:0001071;GO:0003676;GO:0003677;GO:0003700;GO:0005488	GO:0005622;GO:0044464	ko02020;ko05111	93.918	0	23.635	81366336	57889000	63413332	107842000	1.50257	1.21752	0.148286	0.551419	0.122517	1.11121	-0.123091	2.13326	-0.271377	0.0924685	-0.0257692	1.196	-0.245608	Q9KNW6	>tr|Q9KNW6|Q9KNW6_VIBCH Cyclic AMP receptor protein OS=Vibrio cholerae serotype O1 (strain ATCC 39315 / El Tor Inaba N16961) GN=VC_2614 PE=4 SV=1
7.2711	7.35038	7.23231	7.1634	7.22409	7.17099	7.21338	7.19257	7.05896	7.07748	7.09124	7.10127	+			+	+			carbohydrate metabolic process;metabolic process;primary metabolic process	adenyl nucleotide binding;adenyl ribonucleotide binding;ATP binding;binding;catalytic activity;kinase activity;nucleotide binding;phosphoribulokinase activity;phosphotransferase activity, alcohol group as acceptor;purine nucleotide binding;purine ribonucleoside triphosphate binding;purine ribonucleotide binding;ribonucleotide binding;transferase activity;transferase activity, transferring phospho…		Carbon fixation in photosynthetic organisms	GO:0005975;GO:0008152;GO:0044238	GO:0000166;GO:0003824;GO:0005488;GO:0005524;GO:0008974;GO:0016301;GO:0016740;GO:0016772;GO:0016773;GO:0017076;GO:0030554;GO:0032553;GO:0032555;GO:0032559;GO:0035639		ko00710	41.842	0	32.785	19382666	15382000	14459667	12305667	1.83572	1.16746	0.0984348	1.0216	0.129627	2.27155	0.194601	2.0432	0.0961665	0.235817	0.0311925	0.594433	0.064974	Q9KNW7	>tr|Q9KNW7|Q9KNW7_VIBCH Phosphoribulokinase OS=Vibrio cholerae serotype O1 (strain ATCC 39315 / El Tor Inaba N16961) GN=VC_2613 PE=4 SV=1
7.70834	7.80473	7.77276	7.70428	7.70483	7.62115	7.52416	7.45208	7.42464	7.54164	7.61777	7.51813	+		+	+	+	+		amine metabolic process;carboxylic acid metabolic process;cellular amine metabolic process;cellular amino acid metabolic process;cellular ketone metabolic process;cellular metabolic process;cellular nitrogen compound metabolic process;cellular process;metabolic process;nitrogen compound metabolic process;organic acid metabolic process;oxoacid metabolic process;primary metabolic process;small mole…	asparaginase activity;catalytic activity;hydrolase activity;hydrolase activity, acting on carbon-nitrogen (but not peptide) bonds;hydrolase activity, acting on carbon-nitrogen (but not peptide) bonds, in linear amides			GO:0006082;GO:0006520;GO:0006807;GO:0008152;GO:0009308;GO:0009987;GO:0019752;GO:0034641;GO:0042180;GO:0043436;GO:0044106;GO:0044237;GO:0044238;GO:0044281	GO:0003824;GO:0004067;GO:0016787;GO:0016810;GO:0016811			67.998	0	35.052	58046000	47697000	29445334	36416332	3.3484	1.00676	0.0851952	2.7023	0.294987	2.09667	0.202766	1.34267	0.117571	2.17368	0.209792	1.02481	-0.0922208	Q9KNX7	>tr|Q9KNX7|Q9KNX7_VIBCH Asparaginase, putative OS=Vibrio cholerae serotype O1 (strain ATCC 39315 / El Tor Inaba N16961) GN=VC_2603 PE=4 SV=1
8.60508	8.58373	8.62014	8.7113	8.6934	8.73189	8.87471	8.91342	8.90238	8.80089	8.74882	8.80768	+	+	+	+	+	+	+	AMP biosynthetic process;AMP metabolic process;biosynthetic process;cellular biosynthetic process;cellular metabolic process;cellular nitrogen compound biosynthetic process;cellular nitrogen compound metabolic process;cellular process;'de novo' AMP biosynthetic process;heterocycle biosynthetic process;heterocycle metabolic process;metabolic process;nitrogen compound metabolic process;nucleobase-c…	adenylosuccinate synthase activity;binding;catalytic activity;cation binding;GTP binding;guanyl nucleotide binding;guanyl ribonucleotide binding;ion binding;ligase activity;ligase activity, forming carbon-nitrogen bonds;magnesium ion binding;metal ion binding;nucleotide binding;purine nucleotide binding;purine ribonucleoside triphosphate binding;purine ribonucleotide binding;ribonucleotide binding	cell part;cytoplasm;intracellular part	Alanine, aspartate and glutamate metabolism;Purine metabolism	GO:0006139;GO:0006163;GO:0006164;GO:0006167;GO:0006753;GO:0006807;GO:0008152;GO:0009058;GO:0009117;GO:0009123;GO:0009124;GO:0009126;GO:0009127;GO:0009150;GO:0009152;GO:0009156;GO:0009161;GO:0009165;GO:0009167;GO:0009168;GO:0009259;GO:0009260;GO:0009987;GO:0018130;GO:0034641;GO:0034654;GO:0044208;GO:0044237;GO:0044238;GO:0044249;GO:0044271;GO:0044281;GO:0046033;GO:0046483;GO:0055086;GO:0072521;GO:…	GO:0000166;GO:0000287;GO:0003824;GO:0004019;GO:0005488;GO:0005525;GO:0016874;GO:0016879;GO:0017076;GO:0019001;GO:0032553;GO:0032555;GO:0032561;GO:0035639;GO:0043167;GO:0043169;GO:0046872	GO:0005737;GO:0044424;GO:0044464	ko00230;ko00250	323.31	0	46.818	401086688	515800000	789116672	611760000	5.69641	2.68724	-0.109214	4.32731	-0.293856	2.98813	-0.182814	1.56307	-0.0735998	3.49142	-0.184642	2.14908	0.111042	Q9KNX8	>sp|Q9KNX8|PURA_VIBCH Adenylosuccinate synthetase OS=Vibrio cholerae serotype O1 (strain ATCC 39315 / El Tor Inaba N16961) GN=purA PE=3 SV=3
8.05801	8.02391	8.00243	8.05519	8.00217	7.99577	8.40846	8.46813	8.27293	8.36139	8.37343	8.33039	+		+	+	+	+		cellular macromolecule metabolic process;cellular metabolic process;cellular nitrogen compound metabolic process;cellular process;macromolecule metabolic process;metabolic process;nitrogen compound metabolic process;nucleic acid metabolic process;nucleobase-containing compound metabolic process;primary metabolic process;RNA metabolic process;RNA processing	3'-5' exonuclease activity;binding;catalytic activity;exonuclease activity;exonuclease activity, active with either ribo- or deoxyribonucleic acids and producing 5'-phosphomonoesters;exoribonuclease activity;exoribonuclease activity, producing 5'-phosphomonoesters;exoribonuclease II activity;hydrolase activity;hydrolase activity, acting on ester bonds;nuclease activity;nucleic acid binding;ribonu…	cell part;cytoplasm;intracellular part	RNA degradation	GO:0006139;GO:0006396;GO:0006807;GO:0008152;GO:0009987;GO:0016070;GO:0034641;GO:0043170;GO:0044237;GO:0044238;GO:0044260;GO:0090304	GO:0003676;GO:0003723;GO:0003824;GO:0004518;GO:0004527;GO:0004532;GO:0004540;GO:0005488;GO:0008408;GO:0008859;GO:0008997;GO:0016787;GO:0016788;GO:0016796;GO:0016896	GO:0005737;GO:0044424;GO:0044464	ko03018	323.31	0	93.333	106836664	104360336	245816656	226696672	4.39462	0.15699	0.0104067	2.38962	-0.355058	4.03207	-0.326955	3.91717	-0.337362	2.41532	-0.365465	0.180779	0.0281029	Q9KNY1	>sp|Q9KNY1|RNR_VIBCH Ribonuclease R OS=Vibrio cholerae serotype O1 (strain ATCC 39315 / El Tor Inaba N16961) GN=rnr PE=3 SV=1
6.3796	6.50676	6.50505	6.3206	6.55362	6.46724	6.79339	6.74005	6.65843	6.78317	6.81957	6.7921	+		+	+	+	+		cellular macromolecule metabolic process;cellular metabolic process;cellular nitrogen compound metabolic process;cellular process;macromolecule metabolic process;macromolecule methylation;macromolecule modification;metabolic process;methylation;ncRNA metabolic process;ncRNA processing;nitrogen compound metabolic process;nucleic acid metabolic process;nucleobase-containing compound metabolic proce…	binding;catalytic activity;methyltransferase activity;nucleic acid binding;O-methyltransferase activity;RNA binding;RNA methyltransferase activity;rRNA (guanine) methyltransferase activity;rRNA (guanosine-2'-O-)-methyltransferase activity;rRNA methyltransferase activity;S-adenosylmethionine-dependent methyltransferase activity;transferase activity;transferase activity, transferring one-carbon gro…	cell part;cytoplasm;intracellular part		GO:0000154;GO:0000451;GO:0001510;GO:0006139;GO:0006364;GO:0006396;GO:0006730;GO:0006807;GO:0008152;GO:0009451;GO:0009987;GO:0016070;GO:0016072;GO:0031167;GO:0032259;GO:0034470;GO:0034641;GO:0034660;GO:0043170;GO:0043412;GO:0043414;GO:0044237;GO:0044238;GO:0044260;GO:0044281;GO:0090304	GO:0003676;GO:0003723;GO:0003824;GO:0005488;GO:0008168;GO:0008171;GO:0008173;GO:0008649;GO:0008757;GO:0016435;GO:0016740;GO:0016741;GO:0070039	GO:0005737;GO:0044424;GO:0044464		17.762	0	26.601	2.93593e+06	2867500	5.42157e+06	6.28863e+06	3.0336	0.0730075	0.0166518	2.01026	-0.266819	2.81247	-0.334474	2.15511	-0.351126	1.64678	-0.283471	0.764091	-0.0676551	Q9KNY2	>sp|Q9KNY2|RLMB_VIBCH 23S rRNA (guanosine-2-O-)-methyltransferase RlmB OS=Vibrio cholerae serotype O1 (strain ATCC 39315 / El Tor Inaba N16961) GN=rlmB PE=3 SV=1
8.31808	8.26126	8.35097	8.42911	8.474	8.53317	8.56468	8.41974	8.54122	8.43565	8.45142	8.4042	+	+	+	+				biosynthetic process;cellular biosynthetic process;cellular macromolecule biosynthetic process;cellular macromolecule metabolic process;cellular metabolic process;cellular process;cellular protein metabolic process;macromolecule biosynthetic process;macromolecule metabolic process;metabolic process;primary metabolic process;protein metabolic process;translation	binding;nucleic acid binding;RNA binding;structural constituent of ribosome;structural molecule activity;tRNA binding	cell part;cytoplasmic part;intracellular non-membrane-bounded organelle;intracellular organelle;intracellular part;macromolecular complex;non-membrane-bounded organelle;organelle;ribonucleoprotein complex;ribosome	Ribosome	GO:0006412;GO:0008152;GO:0009058;GO:0009059;GO:0009987;GO:0019538;GO:0034645;GO:0043170;GO:0044237;GO:0044238;GO:0044249;GO:0044260;GO:0044267	GO:0000049;GO:0003676;GO:0003723;GO:0003735;GO:0005198;GO:0005488	GO:0005840;GO:0030529;GO:0032991;GO:0043226;GO:0043228;GO:0043229;GO:0043232;GO:0044424;GO:0044444;GO:0044464	ko03010	87.732	0	11.707	204960000	302593312	325863328	269689984	2.07007	1.87159	-0.168655	1.72495	-0.198442	1.81326	-0.12032	0.659769	0.0483351	0.213847	-0.0297861	0.764731	0.0781212	Q9KNY3	>sp|Q9KNY3|RS10_VIBCH 30S ribosomal protein S10 OS=Vibrio cholerae serotype O1 (strain ATCC 39315 / El Tor Inaba N16961) GN=rpsJ PE=3 SV=1
8.91812	8.75055	8.86687	8.99839	8.95341	9.01296	9.03834	8.96586	9.13354	8.94545	8.88875	8.9641	+		+					biological regulation;biosynthetic process;cellular biosynthetic process;cellular macromolecule biosynthetic process;cellular macromolecule metabolic process;cellular metabolic process;cellular nitrogen compound metabolic process;cellular process;cellular protein metabolic process;macromolecule biosynthetic process;macromolecule metabolic process;metabolic process;nitrogen compound metabolic proc…	binding;nucleic acid binding;RNA binding;rRNA binding;structural constituent of ribosome;structural molecule activity	cell part;cytoplasmic part;intracellular non-membrane-bounded organelle;intracellular organelle;intracellular part;macromolecular complex;non-membrane-bounded organelle;organelle;ribonucleoprotein complex;ribosome	Ribosome	GO:0006139;GO:0006353;GO:0006355;GO:0006412;GO:0006417;GO:0006807;GO:0008152;GO:0009058;GO:0009059;GO:0009889;GO:0009987;GO:0010468;GO:0010556;GO:0010608;GO:0016070;GO:0019219;GO:0019222;GO:0019538;GO:0031323;GO:0031326;GO:0032268;GO:0032774;GO:0034641;GO:0034645;GO:0043170;GO:0044237;GO:0044238;GO:0044249;GO:0044260;GO:0044267;GO:0050789;GO:0050794;GO:0051171;GO:0051246;GO:0051252;GO:0060255;GO:…	GO:0003676;GO:0003723;GO:0003735;GO:0005198;GO:0005488;GO:0019843	GO:0005840;GO:0030529;GO:0032991;GO:0043226;GO:0043228;GO:0043229;GO:0043232;GO:0044424;GO:0044444;GO:0044464	ko03010	309.43	0	21.868	709070016	974956672	1125570048	858876672	1.55109	1.27319	-0.143074	1.35228	-0.200735	0.736685	-0.0875851	0.895645	0.0554889	0.484599	-0.0576614	0.99023	0.11315	Q9KNY5	>sp|Q9KNY5|RL4_VIBCH 50S ribosomal protein L4 OS=Vibrio cholerae serotype O1 (strain ATCC 39315 / El Tor Inaba N16961) GN=rplD PE=3 SV=1
8.96492	8.8503	8.91572	8.99356	9.0258	9.09177	9.15782	9.02934	9.11594	8.98321	8.96275	9.06707	+	+	+					biosynthetic process;cellular biosynthetic process;cellular macromolecule biosynthetic process;cellular macromolecule metabolic process;cellular metabolic process;cellular process;cellular protein metabolic process;macromolecule biosynthetic process;macromolecule metabolic process;metabolic process;primary metabolic process;protein metabolic process;translation	binding;catalytic activity;nucleic acid binding;RNA binding;rRNA binding;structural constituent of ribosome;structural molecule activity;transferase activity	cell part;intracellular organelle part;intracellular part;large ribosomal subunit;macromolecular complex;organelle part;ribonucleoprotein complex	Ribosome	GO:0006412;GO:0008152;GO:0009058;GO:0009059;GO:0009987;GO:0019538;GO:0034645;GO:0043170;GO:0044237;GO:0044238;GO:0044249;GO:0044260;GO:0044267	GO:0003676;GO:0003723;GO:0003735;GO:0003824;GO:0005198;GO:0005488;GO:0016740;GO:0019843	GO:0015934;GO:0030529;GO:0032991;GO:0044422;GO:0044424;GO:0044446;GO:0044464	ko03010	308.44	0	29.825	818150016	1093929984	1271366656	1015623360	1.67099	1.34627	-0.12673	1.7149	-0.190721	0.955786	-0.0940278	0.309932	0.0327021	0.601935	-0.0639912	0.912056	0.0966934	Q9KNY7	>sp|Q9KNY7|RL2_VIBCH 50S ribosomal protein L2 OS=Vibrio cholerae serotype O1 (strain ATCC 39315 / El Tor Inaba N16961) GN=rplB PE=3 SV=1
8.69336	8.60074	8.64469	8.81377	8.78596	8.84576	8.95981	8.88219	8.93728	8.831	8.83755	8.80359	+	+	+	+		+	+	biosynthetic process;cellular biosynthetic process;cellular macromolecule biosynthetic process;cellular macromolecule metabolic process;cellular metabolic process;cellular process;cellular protein metabolic process;macromolecule biosynthetic process;macromolecule metabolic process;metabolic process;primary metabolic process;protein metabolic process;translation	binding;nucleic acid binding;RNA binding;rRNA binding;structural constituent of ribosome;structural molecule activity	cell part;intracellular organelle part;intracellular part;large ribosomal subunit;macromolecular complex;organelle part;ribonucleoprotein complex	Ribosome	GO:0006412;GO:0008152;GO:0009058;GO:0009059;GO:0009987;GO:0019538;GO:0034645;GO:0043170;GO:0044237;GO:0044238;GO:0044249;GO:0044260;GO:0044267	GO:0003676;GO:0003723;GO:0003735;GO:0005198;GO:0005488;GO:0019843	GO:0015934;GO:0030529;GO:0032991;GO:0044422;GO:0044424;GO:0044446;GO:0044464	ko03010	269.69	0	12.198	444543328	654409984	846520000	667259968	4.10646	2.21681	-0.168896	2.8645	-0.280163	2.46187	-0.177782	0.166035	-0.0088857	1.74195	-0.111267	1.80959	0.102381	Q9KNY9	>sp|Q9KNY9|RL22_VIBCH 50S ribosomal protein L22 OS=Vibrio cholerae serotype O1 (strain ATCC 39315 / El Tor Inaba N16961) GN=rplV PE=3 SV=1
8.73267	8.65411	8.77493	8.8371	8.87119	8.84859	8.92466	8.80646	8.83379	8.82116	8.82879	8.8882	+	+		+				biosynthetic process;cellular biosynthetic process;cellular macromolecule biosynthetic process;cellular macromolecule metabolic process;cellular metabolic process;cellular process;cellular protein metabolic process;macromolecule biosynthetic process;macromolecule metabolic process;metabolic process;primary metabolic process;protein metabolic process;translation	binding;mRNA binding;nucleic acid binding;RNA binding;rRNA binding;structural constituent of ribosome;structural molecule activity	cell part;intracellular organelle part;intracellular part;macromolecular complex;organelle part;ribonucleoprotein complex;small ribosomal subunit	Ribosome	GO:0006412;GO:0008152;GO:0009058;GO:0009059;GO:0009987;GO:0019538;GO:0034645;GO:0043170;GO:0044237;GO:0044238;GO:0044249;GO:0044260;GO:0044267	GO:0003676;GO:0003723;GO:0003729;GO:0003735;GO:0005198;GO:0005488;GO:0019843	GO:0015935;GO:0030529;GO:0032991;GO:0044422;GO:0044424;GO:0044446;GO:0044464	ko03010	323.31	0	25.611	528946656	712073344	721053312	703233344	1.62981	1.63531	-0.131723	1.25433	-0.134401	1.41624	-0.12548	0.0952102	0.00624275	0.0241379	-0.0026776	0.0754776	0.00892035	Q9KNZ0	>sp|Q9KNZ0|RS3_VIBCH 30S ribosomal protein S3 OS=Vibrio cholerae serotype O1 (strain ATCC 39315 / El Tor Inaba N16961) GN=rpsC PE=3 SV=1
8.10459	8.08095	8.13078	8.32615	8.24217	8.39032	8.47195	8.3376	8.42022	8.2999	8.351	8.19103	+	+	+	+				biosynthetic process;cellular biosynthetic process;cellular macromolecule biosynthetic process;cellular macromolecule metabolic process;cellular metabolic process;cellular process;cellular protein metabolic process;macromolecule biosynthetic process;macromolecule metabolic process;metabolic process;primary metabolic process;protein metabolic process;translation	binding;nucleic acid binding;RNA binding;rRNA binding;structural constituent of ribosome;structural molecule activity;tRNA binding	cell part;cytoplasmic part;intracellular non-membrane-bounded organelle;intracellular organelle;intracellular part;macromolecular complex;non-membrane-bounded organelle;organelle;ribonucleoprotein complex;ribosome	Ribosome	GO:0006412;GO:0008152;GO:0009058;GO:0009059;GO:0009987;GO:0019538;GO:0034645;GO:0043170;GO:0044237;GO:0044238;GO:0044249;GO:0044260;GO:0044267	GO:0000049;GO:0003676;GO:0003723;GO:0003735;GO:0005198;GO:0005488;GO:0019843	GO:0005840;GO:0030529;GO:0032991;GO:0043226;GO:0043228;GO:0043229;GO:0043232;GO:0044424;GO:0044444;GO:0044464	ko03010	90.569	0	15.551	127620000	210736672	259060000	193040000	2.51389	2.04147	-0.214104	2.72848	-0.304482	1.62439	-0.175203	0.240529	0.038901	0.711012	-0.0903775	0.989034	0.129279	Q9KNZ1	>sp|Q9KNZ1|RL16_VIBCH 50S ribosomal protein L16 OS=Vibrio cholerae serotype O1 (strain ATCC 39315 / El Tor Inaba N16961) GN=rplP PE=3 SV=1
7.62171	7.89634	7.79109	8.0038	7.89422	8.25679	8.27816	8.24883	8.3276	8.13555	8.11501	8.03189	+		+	+			+	biosynthetic process;cellular biosynthetic process;cellular macromolecule biosynthetic process;cellular macromolecule metabolic process;cellular metabolic process;cellular process;cellular protein metabolic process;macromolecule biosynthetic process;macromolecule metabolic process;metabolic process;primary metabolic process;protein metabolic process;translation	binding;nucleic acid binding;RNA binding;rRNA binding;structural constituent of ribosome;structural molecule activity	cell part;cytoplasmic part;intracellular non-membrane-bounded organelle;intracellular organelle;intracellular part;macromolecular complex;non-membrane-bounded organelle;organelle;ribonucleoprotein complex;ribosome	Ribosome	GO:0006412;GO:0008152;GO:0009058;GO:0009059;GO:0009987;GO:0019538;GO:0034645;GO:0043170;GO:0044237;GO:0044238;GO:0044249;GO:0044260;GO:0044267	GO:0003676;GO:0003723;GO:0003735;GO:0005198;GO:0005488;GO:0019843	GO:0005840;GO:0030529;GO:0032991;GO:0043226;GO:0043228;GO:0043229;GO:0043232;GO:0044424;GO:0044444;GO:0044464	ko03010	102.83	0	9.6393	60810668	119964336	193236672	124856664	2.25922	0.987098	-0.281893	2.46043	-0.515152	1.70786	-0.324437	0.140734	-0.0425442	0.99644	-0.233259	2.0857	0.190715	Q9KNZ3	>sp|Q9KNZ3|RS17_VIBCH 30S ribosomal protein S17 OS=Vibrio cholerae serotype O1 (strain ATCC 39315 / El Tor Inaba N16961) GN=rpsQ PE=3 SV=1
8.46727	8.36449	8.44755	8.48001	8.49916	8.57895	8.6941	8.62093	8.60755	8.55424	8.56685	8.46571	+		+			+		biosynthetic process;cellular biosynthetic process;cellular macromolecule biosynthetic process;cellular macromolecule metabolic process;cellular metabolic process;cellular process;cellular protein metabolic process;macromolecule biosynthetic process;macromolecule metabolic process;metabolic process;primary metabolic process;protein metabolic process;translation	binding;nucleic acid binding;RNA binding;rRNA binding;structural constituent of ribosome;structural molecule activity	cell part;intracellular organelle part;intracellular part;large ribosomal subunit;macromolecular complex;organelle part;ribonucleoprotein complex	Ribosome	GO:0006412;GO:0008152;GO:0009058;GO:0009059;GO:0009987;GO:0019538;GO:0034645;GO:0043170;GO:0044237;GO:0044238;GO:0044249;GO:0044260;GO:0044267	GO:0003676;GO:0003723;GO:0003735;GO:0005198;GO:0005488;GO:0019843	GO:0015934;GO:0030529;GO:0032991;GO:0044422;GO:0044424;GO:0044446;GO:0044464	ko03010	211.59	0	13.581	268330000	332296672	439089984	339786656	2.13648	0.997545	-0.0929375	2.17932	-0.214422	1.07623	-0.102495	0.0765297	-0.00955772	1.39797	-0.121484	1.2607	0.111927	Q9KNZ4	>sp|Q9KNZ4|RL14_VIBCH 50S ribosomal protein L14 OS=Vibrio cholerae serotype O1 (strain ATCC 39315 / El Tor Inaba N16961) GN=rplN PE=3 SV=1
8.25096	8.19123	8.23639	8.38041	8.26677	8.36008	8.4604	8.33726	8.66211	8.38625	8.32974	8.33351	+	+		+				biosynthetic process;cellular biosynthetic process;cellular macromolecule biosynthetic process;cellular macromolecule metabolic process;cellular metabolic process;cellular process;cellular protein metabolic process;macromolecule biosynthetic process;macromolecule metabolic process;metabolic process;primary metabolic process;protein metabolic process;translation	binding;nucleic acid binding;RNA binding;rRNA binding;structural constituent of ribosome;structural molecule activity	cell part;cytoplasmic part;intracellular non-membrane-bounded organelle;intracellular organelle;intracellular part;macromolecular complex;non-membrane-bounded organelle;organelle;ribonucleoprotein complex;ribosome	Ribosome	GO:0006412;GO:0008152;GO:0009058;GO:0009059;GO:0009987;GO:0019538;GO:0034645;GO:0043170;GO:0044237;GO:0044238;GO:0044249;GO:0044260;GO:0044267	GO:0003676;GO:0003723;GO:0003735;GO:0005198;GO:0005488;GO:0019843	GO:0005840;GO:0030529;GO:0032991;GO:0043226;GO:0043228;GO:0043229;GO:0043232;GO:0044424;GO:0044444;GO:0044464	ko03010	55.25	0	11.347	168626672	218023328	321793344	224186672	1.33397	1.30497	-0.109565	1.2677	-0.260399	2.07176	-0.123644	0.131206	-0.0140788	0.678994	-0.150834	0.639966	0.136755	Q9KNZ5	>sp|Q9KNZ5|RL24_VIBCH 50S ribosomal protein L24 OS=Vibrio cholerae serotype O1 (strain ATCC 39315 / El Tor Inaba N16961) GN=rplX PE=3 SV=1
8.77372	8.73689	8.79469	8.89998	8.90718	8.88452	9.0588	8.98965	8.96202	9.01532	9.03064	8.92159	+	+	+	+		+		biosynthetic process;cellular biosynthetic process;cellular macromolecule biosynthetic process;cellular macromolecule metabolic process;cellular metabolic process;cellular process;cellular protein metabolic process;macromolecule biosynthetic process;macromolecule metabolic process;metabolic process;primary metabolic process;protein metabolic process;translation	binding;nucleic acid binding;RNA binding;rRNA binding;structural constituent of ribosome;structural molecule activity;tRNA binding	cell part;cytoplasmic part;intracellular non-membrane-bounded organelle;intracellular organelle;intracellular part;macromolecular complex;non-membrane-bounded organelle;organelle;ribonucleoprotein complex;ribosome	Ribosome	GO:0006412;GO:0008152;GO:0009058;GO:0009059;GO:0009987;GO:0019538;GO:0034645;GO:0043170;GO:0044237;GO:0044238;GO:0044249;GO:0044260;GO:0044267	GO:0000049;GO:0003676;GO:0003723;GO:0003735;GO:0005198;GO:0005488;GO:0019843	GO:0005840;GO:0030529;GO:0032991;GO:0043226;GO:0043228;GO:0043229;GO:0043232;GO:0044424;GO:0044444;GO:0044464	ko03010	323.31	0	20.158	587606656	789459968	1012566656	981270016	3.36209	2.67975	-0.128794	2.66904	-0.235057	2.35782	-0.220749	1.24307	-0.0919549	1.64132	-0.106263	0.11663	0.014308	Q9KNZ6	>sp|Q9KNZ6|RL5_VIBCH 50S ribosomal protein L5 OS=Vibrio cholerae serotype O1 (strain ATCC 39315 / El Tor Inaba N16961) GN=rplE PE=3 SV=1
8.07313	8.0329	8.0461	8.2865	8.17716	8.2315	8.12235	8.05408	8.27411	7.97235	8.10109	8.03205	+	+			+			biosynthetic process;cellular biosynthetic process;cellular macromolecule biosynthetic process;cellular macromolecule metabolic process;cellular metabolic process;cellular process;cellular protein metabolic process;macromolecule biosynthetic process;macromolecule metabolic process;metabolic process;primary metabolic process;protein metabolic process;translation	binding;nucleic acid binding;RNA binding;rRNA binding;structural constituent of ribosome;structural molecule activity	cell part;cytoplasmic part;intracellular non-membrane-bounded organelle;intracellular organelle;intracellular part;macromolecular complex;non-membrane-bounded organelle;organelle;ribonucleoprotein complex;ribosome	Ribosome	GO:0006412;GO:0008152;GO:0009058;GO:0009059;GO:0009987;GO:0019538;GO:0034645;GO:0043170;GO:0044237;GO:0044238;GO:0044249;GO:0044260;GO:0044267	GO:0003676;GO:0003723;GO:0003735;GO:0005198;GO:0005488;GO:0019843	GO:0005840;GO:0030529;GO:0032991;GO:0043226;GO:0043228;GO:0043229;GO:0043232;GO:0044424;GO:0044444;GO:0044464	ko03010	61.45	0	11.61	112470000	171400000	144593328	109233664	1.51652	2.23582	-0.181007	0.684455	-0.099466	0.148272	0.0155478	1.8028	0.196555	0.491663	0.0815407	0.700038	0.115014	Q9KNZ7	>sp|Q9KNZ7|RS14_VIBCH 30S ribosomal protein S14 OS=Vibrio cholerae serotype O1 (strain ATCC 39315 / El Tor Inaba N16961) GN=rpsN PE=3 SV=1
8.39707	8.30769	8.34484	8.53489	8.50905	8.45096	8.6363	8.45693	8.57688	8.53371	8.5292	8.51842	+	+	+	+				biosynthetic process;cellular biosynthetic process;cellular macromolecule biosynthetic process;cellular macromolecule metabolic process;cellular metabolic process;cellular process;cellular protein metabolic process;macromolecule biosynthetic process;macromolecule metabolic process;metabolic process;primary metabolic process;protein metabolic process;translation	binding;nucleic acid binding;RNA binding;rRNA binding;structural constituent of ribosome;structural molecule activity	cell part;cytoplasmic part;intracellular non-membrane-bounded organelle;intracellular organelle;intracellular part;macromolecular complex;non-membrane-bounded organelle;organelle;ribonucleoprotein complex;ribosome	Ribosome	GO:0006412;GO:0008152;GO:0009058;GO:0009059;GO:0009987;GO:0019538;GO:0034645;GO:0043170;GO:0044237;GO:0044238;GO:0044249;GO:0044260;GO:0044267	GO:0003676;GO:0003723;GO:0003735;GO:0005198;GO:0005488;GO:0019843	GO:0005840;GO:0030529;GO:0032991;GO:0043226;GO:0043228;GO:0043229;GO:0043232;GO:0044424;GO:0044444;GO:0044464	ko03010	105.57	0	13.981	224606672	316009984	365549984	336633344	2.10572	1.84088	-0.148432	1.61126	-0.206834	2.59639	-0.177242	0.498662	-0.0288099	0.428116	-0.0584021	0.217495	0.0295922	Q9KNZ8	>sp|Q9KNZ8|RS8_VIBCH 30S ribosomal protein S8 OS=Vibrio cholerae serotype O1 (strain ATCC 39315 / El Tor Inaba N16961) GN=rpsH PE=3 SV=1
8.65366	8.59847	8.76063	8.75582	8.7827	8.84293	8.98542	8.89513	8.95208	8.78863	8.81136	8.72339	+		+			+	+	biosynthetic process;cellular biosynthetic process;cellular macromolecule biosynthetic process;cellular macromolecule metabolic process;cellular metabolic process;cellular process;cellular protein metabolic process;macromolecule biosynthetic process;macromolecule metabolic process;metabolic process;primary metabolic process;protein metabolic process;translation	binding;nucleic acid binding;RNA binding;rRNA binding;structural constituent of ribosome;structural molecule activity	cell part;cytoplasmic part;intracellular non-membrane-bounded organelle;intracellular organelle;intracellular part;macromolecular complex;non-membrane-bounded organelle;organelle;ribonucleoprotein complex;ribosome	Ribosome	GO:0006412;GO:0008152;GO:0009058;GO:0009059;GO:0009987;GO:0019538;GO:0034645;GO:0043170;GO:0044237;GO:0044238;GO:0044249;GO:0044260;GO:0044267	GO:0003676;GO:0003723;GO:0003735;GO:0005198;GO:0005488;GO:0019843	GO:0005840;GO:0030529;GO:0032991;GO:0043226;GO:0043228;GO:0043229;GO:0043232;GO:0044424;GO:0044444;GO:0044464	ko03010	272.27	0	18.808	474480000	624253312	882663360	597083328	2.5761	1.06732	-0.122898	2.13248	-0.273292	0.886707	-0.103541	0.202603	0.0193574	1.82144	-0.150394	1.98326	0.169751	Q9KNZ9	>sp|Q9KNZ9|RL6_VIBCH 50S ribosomal protein L6 OS=Vibrio cholerae serotype O1 (strain ATCC 39315 / El Tor Inaba N16961) GN=rplF PE=3 SV=1
7.59294	7.56944	7.54418	7.70255	7.64281	7.87214	7.95212	7.77543	7.98665	7.43943	7.76721	7.62693	+		+					biosynthetic process;cellular biosynthetic process;cellular macromolecule biosynthetic process;cellular macromolecule metabolic process;cellular metabolic process;cellular process;cellular protein metabolic process;macromolecule biosynthetic process;macromolecule metabolic process;metabolic process;primary metabolic process;protein metabolic process;translation	structural constituent of ribosome;structural molecule activity	cell part;intracellular organelle part;intracellular part;large ribosomal subunit;macromolecular complex;organelle part;ribonucleoprotein complex	Ribosome	GO:0006412;GO:0008152;GO:0009058;GO:0009059;GO:0009987;GO:0019538;GO:0034645;GO:0043170;GO:0044237;GO:0044238;GO:0044249;GO:0044260;GO:0044267	GO:0003735;GO:0005198	GO:0015934;GO:0030529;GO:0032991;GO:0044422;GO:0044424;GO:0044446;GO:0044464	ko03010	150.63	0	6.5838	37094668	56282000	82052664	42790332	1.5162	1.14234	-0.170311	2.1315	-0.335876	0.166234	-0.0423346	0.473439	0.127977	0.807337	-0.165564	1.19665	0.293541	Q9KP02	>sp|Q9KP02|RL30_VIBCH 50S ribosomal protein L30 OS=Vibrio cholerae serotype O1 (strain ATCC 39315 / El Tor Inaba N16961) GN=rpmD PE=3 SV=1
8.70751	8.60596	8.69232	8.8559	8.82551	8.78027	8.91854	8.79289	8.74853	8.76368	8.82374	8.75031	+	+		+				biosynthetic process;cellular biosynthetic process;cellular macromolecule biosynthetic process;cellular macromolecule metabolic process;cellular metabolic process;cellular process;cellular protein metabolic process;macromolecule biosynthetic process;macromolecule metabolic process;metabolic process;primary metabolic process;protein metabolic process;translation	binding;nucleic acid binding;RNA binding;rRNA binding;structural constituent of ribosome;structural molecule activity	cell part;intracellular organelle part;intracellular part;large ribosomal subunit;macromolecular complex;organelle part;ribonucleoprotein complex	Ribosome	GO:0006412;GO:0008152;GO:0009058;GO:0009059;GO:0009987;GO:0019538;GO:0034645;GO:0043170;GO:0044237;GO:0044238;GO:0044249;GO:0044260;GO:0044267	GO:0003676;GO:0003723;GO:0003735;GO:0005198;GO:0005488;GO:0019843	GO:0015934;GO:0030529;GO:0032991;GO:0044422;GO:0044424;GO:0044446;GO:0044464	ko03010	94.587	0	14.946	468646656	663230016	670043328	603163328	1.39884	1.77286	-0.151962	1.18746	-0.151391	1.33241	-0.110647	0.585066	0.0413151	0.00336843	0.000571251	0.29671	0.0407438	Q9KP03	>sp|Q9KP03|RL15_VIBCH 50S ribosomal protein L15 OS=Vibrio cholerae serotype O1 (strain ATCC 39315 / El Tor Inaba N16961) GN=rplO PE=3 SV=1
8.82268	8.73606	8.80931	8.96112	8.93009	8.97277	9.05808	8.97753	9.08095	8.91799	8.94735	8.89757	+	+	+	+			+	biosynthetic process;cellular biosynthetic process;cellular macromolecule biosynthetic process;cellular macromolecule metabolic process;cellular metabolic process;cellular process;cellular protein metabolic process;macromolecule biosynthetic process;macromolecule metabolic process;metabolic process;primary metabolic process;protein metabolic process;translation	binding;nucleic acid binding;RNA binding;rRNA binding;structural constituent of ribosome;structural molecule activity;tRNA binding	cell part;cytoplasmic part;intracellular non-membrane-bounded organelle;intracellular organelle;intracellular part;macromolecular complex;non-membrane-bounded organelle;organelle;ribonucleoprotein complex;ribosome	Ribosome	GO:0006412;GO:0008152;GO:0009058;GO:0009059;GO:0009987;GO:0019538;GO:0034645;GO:0043170;GO:0044237;GO:0044238;GO:0044249;GO:0044260;GO:0044267	GO:0000049;GO:0003676;GO:0003723;GO:0003735;GO:0005198;GO:0005488;GO:0019843	GO:0005840;GO:0030529;GO:0032991;GO:0043226;GO:0043228;GO:0043229;GO:0043232;GO:0044424;GO:0044444;GO:0044464	ko03010	300.7	0	13.271	618000000	901630016	1099190016	834556672	3.39873	2.28765	-0.165305	2.42038	-0.249502	1.90069	-0.131621	0.80903	0.0336835	1.16945	-0.0841967	1.56959	0.11788	Q9KP05	>sp|Q9KP05|RS13_VIBCH 30S ribosomal protein S13 OS=Vibrio cholerae serotype O1 (strain ATCC 39315 / El Tor Inaba N16961) GN=rpsM PE=3 SV=1
9.00095	9.03395	9.06651	8.92422	8.89026	9.00548	9.16791	9.20474	9.13739	9.15866	9.1596	9.16477	+		+	+	+	+		biosynthetic process;cellular biosynthetic process;cellular macromolecule biosynthetic process;cellular macromolecule metabolic process;cellular metabolic process;cellular nitrogen compound metabolic process;cellular process;macromolecule biosynthetic process;macromolecule metabolic process;metabolic process;nitrogen compound metabolic process;nucleic acid metabolic process;nucleobase-containing …	binding;catalytic activity;DNA binding;DNA-directed RNA polymerase activity;nucleic acid binding;nucleotidyltransferase activity;RNA polymerase activity;transferase activity;transferase activity, transferring phosphorus-containing groups		Purine metabolism;Pyrimidine metabolism;RNA polymerase	GO:0006139;GO:0006351;GO:0006807;GO:0008152;GO:0009058;GO:0009059;GO:0009987;GO:0016070;GO:0032774;GO:0034641;GO:0034645;GO:0043170;GO:0044237;GO:0044238;GO:0044249;GO:0044260;GO:0090304	GO:0003676;GO:0003677;GO:0003824;GO:0003899;GO:0005488;GO:0016740;GO:0016772;GO:0016779;GO:0034062		ko00230;ko00240;ko03020	323.31	0	36.415	1083000064	876436672	1482133376	1448833280	3.71374	1.12922	0.0938152	2.13043	-0.136208	2.58515	-0.127206	2.52819	-0.221021	2.3699	-0.230023	0.174351	0.00900205	Q9KP08	>sp|Q9KP08|RPOA_VIBCH DNA-directed RNA polymerase subunit alpha OS=Vibrio cholerae serotype O1 (strain ATCC 39315 / El Tor Inaba N16961) GN=rpoA PE=3 SV=1
8.46403	8.38698	8.49319	8.56883	8.49733	8.53496	8.77547	8.75991	8.54635	8.62817	8.69646	8.60795	+		+	+	+			biosynthetic process;cellular biosynthetic process;cellular macromolecule biosynthetic process;cellular macromolecule metabolic process;cellular metabolic process;cellular process;cellular protein metabolic process;macromolecule biosynthetic process;macromolecule metabolic process;metabolic process;primary metabolic process;protein metabolic process;translation	structural constituent of ribosome;structural molecule activity	cell part;cytoplasmic part;intracellular non-membrane-bounded organelle;intracellular organelle;intracellular part;macromolecular complex;non-membrane-bounded organelle;organelle;ribonucleoprotein complex;ribosome	Ribosome	GO:0006412;GO:0008152;GO:0009058;GO:0009059;GO:0009987;GO:0019538;GO:0034645;GO:0043170;GO:0044237;GO:0044238;GO:0044249;GO:0044260;GO:0044267	GO:0003735;GO:0005198	GO:0005840;GO:0030529;GO:0032991;GO:0043226;GO:0043228;GO:0043229;GO:0043232;GO:0044424;GO:0044444;GO:0044464	ko03010	152.6	0	14.405	282056672	342523328	507823328	442456672	1.79686	1.06428	-0.0856435	1.42282	-0.245842	2.0401	-0.196128	1.51047	-0.110484	0.978186	-0.160199	0.250645	0.0497141	Q9KP09	>sp|Q9KP09|RL17_VIBCH 50S ribosomal protein L17 OS=Vibrio cholerae serotype O1 (strain ATCC 39315 / El Tor Inaba N16961) GN=rplQ PE=3 SV=1
7.6388	7.76094	7.68378	7.44721	7.53166	7.52477	7.91862	7.85546	7.97316	7.91672	8.01115	7.93379	+	+	+	+	+	+		cellular macromolecule metabolic process;cellular metabolic process;cellular process;cellular protein metabolic process;macromolecule metabolic process;metabolic process;primary metabolic process;protein folding;protein metabolic process	catalytic activity;cis-trans isomerase activity;isomerase activity;peptidyl-prolyl cis-trans isomerase activity			GO:0006457;GO:0008152;GO:0009987;GO:0019538;GO:0043170;GO:0044237;GO:0044238;GO:0044260;GO:0044267	GO:0003755;GO:0003824;GO:0016853;GO:0016859			38.536	0	22.24	49827000	31832000	82870000	90337000	4.60062	1.90376	0.193294	1.96219	-0.221241	2.31255	-0.259381	3.47123	-0.452675	3.17056	-0.414536	0.354722	-0.0381395	Q9KP11	>tr|Q9KP11|Q9KP11_VIBCH Peptidyl-prolyl cis-trans isomerase OS=Vibrio cholerae serotype O1 (strain ATCC 39315 / El Tor Inaba N16961) GN=VC_2568 PE=3 SV=1
8.34357	8.36042	8.3184	8.31363	8.35307	8.3714	8.5249	8.55096	8.65179	8.52434	8.50301	8.57221	+		+	+	+	+		catabolic process;cellular catabolic process;cellular metabolic process;cellular nitrogen compound catabolic process;cellular nitrogen compound metabolic process;cellular process;metabolic process;nitrogen compound metabolic process;nucleobase-containing compound catabolic process;nucleobase-containing compound metabolic process;nucleobase-containing small molecule metabolic process;nucleoside ph…	2',3'-cyclic-nucleotide 2'-phosphodiesterase activity;binding;catalytic activity;cation binding;cyclic-nucleotide phosphodiesterase activity;hydrolase activity;hydrolase activity, acting on ester bonds;ion binding;metal ion binding;nucleotide binding;phosphoric diester hydrolase activity;phosphoric ester hydrolase activity		Purine metabolism;Pyrimidine metabolism	GO:0006139;GO:0006753;GO:0006807;GO:0008152;GO:0009056;GO:0009117;GO:0009166;GO:0009987;GO:0034641;GO:0034655;GO:0044237;GO:0044238;GO:0044248;GO:0044270;GO:0044281;GO:0055086	GO:0000166;GO:0003824;GO:0004112;GO:0005488;GO:0008081;GO:0008663;GO:0016787;GO:0016788;GO:0042578;GO:0043167;GO:0043169;GO:0046872		ko00230;ko00240	323.31	0	75.031	219350000	222176672	379673312	342106688	3.73676	0.0888609	-0.00523949	2.35552	-0.23509	2.89358	-0.192394	2.66579	-0.187154	2.25526	-0.22985	0.415057	0.042696	Q9KP17	>tr|Q9KP17|Q9KP17_VIBCH 2`,3`-cyclic-nucleotide 2`-phosphodiesterase OS=Vibrio cholerae serotype O1 (strain ATCC 39315 / El Tor Inaba N16961) GN=VC_2562 PE=3 SV=1
8.66877	8.60814	8.62431	8.63941	8.68206	8.74216	8.98194	8.95398	8.99916	8.87705	8.85135	8.90069	+		+	+	+	+	+	alcohol biosynthetic process;alcohol metabolic process;biosynthetic process;carbohydrate biosynthetic process;carbohydrate metabolic process;cellular biosynthetic process;cellular carbohydrate biosynthetic process;cellular carbohydrate metabolic process;cellular metabolic process;cellular process;gluconeogenesis;glucose metabolic process;hexose biosynthetic process;hexose metabolic process;metabo…	binding;carbohydrate phosphatase activity;catalytic activity;cation binding;fructose 1,6-bisphosphate 1-phosphatase activity;hydrolase activity;hydrolase activity, acting on ester bonds;ion binding;magnesium ion binding;metal ion binding;phosphatase activity;phosphoric ester hydrolase activity;sugar-phosphatase activity	cell part;cytoplasm;intracellular part	Carbon fixation in photosynthetic organisms;Fructose and mannose metabolism;Glycolysis / Gluconeogenesis;Insulin signaling pathway;Methane metabolism;Pentose phosphate pathway	GO:0005975;GO:0005996;GO:0006006;GO:0006066;GO:0006094;GO:0008152;GO:0009058;GO:0009987;GO:0016051;GO:0019253;GO:0019318;GO:0019319;GO:0019685;GO:0034637;GO:0044237;GO:0044238;GO:0044249;GO:0044262;GO:0044281;GO:0044283;GO:0046165;GO:0046364	GO:0000287;GO:0003824;GO:0005488;GO:0016787;GO:0016788;GO:0016791;GO:0019203;GO:0042132;GO:0042578;GO:0043167;GO:0043169;GO:0046872;GO:0050308	GO:0005737;GO:0044424;GO:0044464	ko00010;ko00030;ko00051;ko00680;ko00710;ko04910	323.31	0	37.341	431026656	489700000	952266688	753063360	5.23466	0.708525	-0.0541328	3.98225	-0.34462	3.33627	-0.242624	2.33122	-0.188491	3.05802	-0.290488	2.20324	0.101997	Q9KP35	>sp|Q9KP35|F16PA_VIBCH Fructose-1,6-bisphosphatase class 1 OS=Vibrio cholerae serotype O1 (strain ATCC 39315 / El Tor Inaba N16961) GN=fbp PE=3 SV=1
7.85077	7.78728	7.78717	7.87638	7.85435	7.82719	7.54317	7.57339	7.56099	7.4956	7.54007	7.55801	+		+	+	+	+		establishment of localization;nitrogen compound transport;sulfur compound transport;thiamine transport;transport;vitamin transport	active transmembrane transporter activity;adenyl nucleotide binding;adenyl ribonucleotide binding;ATP binding;ATPase activity;ATPase activity, coupled;ATPase activity, coupled to movement of substances;ATPase activity, coupled to transmembrane movement of substances;binding;catalytic activity;hydrolase activity;hydrolase activity, acting on acid anhydrides;hydrolase activity, acting on acid anhyd…	cell part;external encapsulating structure part;outer membrane-bounded periplasmic space;periplasmic space	ABC transporters	GO:0006810;GO:0015888;GO:0051180;GO:0051234;GO:0071705;GO:0072348	GO:0000166;GO:0003824;GO:0005215;GO:0005488;GO:0005524;GO:0015234;GO:0015399;GO:0015405;GO:0016462;GO:0016787;GO:0016817;GO:0016818;GO:0016820;GO:0016887;GO:0017076;GO:0017111;GO:0019842;GO:0022804;GO:0022857;GO:0022891;GO:0022892;GO:0030554;GO:0030975;GO:0032553;GO:0032555;GO:0032559;GO:0035639;GO:0042623;GO:0042626;GO:0043492;GO:0048502;GO:0051183	GO:0030288;GO:0042597;GO:0044462;GO:0044464	ko02010	120.16	0	36.318	64484332	71303000	36254668	34041668	6.0042	0.801346	-0.0442379	3.39098	0.249218	3.22384	0.277179	3.78999	0.321417	4.20907	0.293456	0.611416	0.0279611	Q9KP40	>tr|Q9KP40|Q9KP40_VIBCH Thiamin ABC transporter, periplasmic thiamin-binding protein OS=Vibrio cholerae serotype O1 (strain ATCC 39315 / El Tor Inaba N16961) GN=VC_2539 PE=4 SV=1
8.35666	8.33808	8.36442	8.3426	8.36037	8.39529	8.3986	8.39185	8.40137	8.32962	8.34317	8.33189	+		+				+	antibiotic biosynthetic process;antibiotic metabolic process;bacteriocin biosynthetic process;bacteriocin metabolic process;biosynthetic process;cellular biosynthetic process;cellular metabolic process;cellular process;drug metabolic process;metabolic process;peptide antibiotic biosynthetic process;peptide antibiotic metabolic process;peptide biosynthetic process;peptide metabolic process;seconda…				GO:0006518;GO:0008152;GO:0009058;GO:0009403;GO:0009404;GO:0009987;GO:0016999;GO:0017000;GO:0017144;GO:0019748;GO:0030152;GO:0030650;GO:0030651;GO:0043043;GO:0044237;GO:0044249;GO:0046224				323.31	0	48.17	225523328	232616672	249626672	216240000	2.13892	0.30626	-0.0130342	2.22183	-0.0442212	0.958591	0.0181561	0.907859	0.0311902	0.926305	-0.0311871	3.60633	0.0623773	Q9KP44	>tr|Q9KP44|Q9KP44_VIBCH PmbA protein OS=Vibrio cholerae serotype O1 (strain ATCC 39315 / El Tor Inaba N16961) GN=VC_2535 PE=4 SV=1
7.2304	7.23093	7.20121	7.25346	7.18472	7.19907	7.33401	7.32822	7.3044	7.42264	7.39145	7.28328	+		+	+	+	+		biosynthetic process;cellular biosynthetic process;cellular macromolecule metabolic process;cellular metabolic process;cellular nitrogen compound metabolic process;cellular process;macromolecule metabolic process;metabolic process;nitrogen compound metabolic process;nucleic acid metabolic process;nucleobase-containing compound metabolic process;primary metabolic process;RNA biosynthetic process;R…	binding;catalytic activity;core DNA-dependent RNA polymerase binding promoter specificity activity;core RNA polymerase binding transcription factor activity;DNA binding;DNA-directed RNA polymerase activity;nucleic acid binding;nucleic acid binding transcription factor activity;nucleotidyltransferase activity;protein binding transcription factor activity;RNA polymerase activity;sequence-specific D…		RNA polymerase;Two-component system;Vibrio cholerae pathogenic cycle	GO:0006139;GO:0006352;GO:0006807;GO:0008152;GO:0009058;GO:0009987;GO:0016070;GO:0032774;GO:0034641;GO:0043170;GO:0044237;GO:0044238;GO:0044249;GO:0044260;GO:0090304	GO:0000988;GO:0000990;GO:0000996;GO:0001071;GO:0003676;GO:0003677;GO:0003700;GO:0003824;GO:0003899;GO:0005488;GO:0016740;GO:0016772;GO:0016779;GO:0016987;GO:0034062		ko02020;ko03020;ko05111	144.65	0	55.438	16636667	16347000	21008666	23430334	2.29606	0.134358	0.00842985	2.79071	-0.101365	1.5414	-0.144942	1.50512	-0.153372	2.06725	-0.109795	0.431756	-0.0435774	Q9KP49	>tr|Q9KP49|Q9KP49_VIBCH RNA polymerase sigma-54 factor OS=Vibrio cholerae serotype O1 (strain ATCC 39315 / El Tor Inaba N16961) GN=VC_2529 PE=3 SV=1
8.49259	8.50164	8.48232	8.50355	8.51541	8.44418	8.51821	8.49044	8.45539	8.42745	8.39072	8.41754	+			+	+		+	alcohol biosynthetic process;alcohol metabolic process;amine metabolic process;amino sugar biosynthetic process;amino sugar metabolic process;aminoglycan biosynthetic process;aminoglycan metabolic process;biological regulation;biosynthetic process;carbohydrate biosynthetic process;carbohydrate metabolic process;cell cycle;cell division;cell wall macromolecule biosynthetic process;cell wall macrom…	catalytic activity;transferase activity;transferase activity, transferring alkyl or aryl (other than methyl) groups;UDP-N-acetylglucosamine 1-carboxyvinyltransferase activity	cell part;cytoplasm;intracellular part	Amino sugar and nucleotide sugar metabolism;Peptidoglycan biosynthesis	GO:0000270;GO:0000271;GO:0005975;GO:0005976;GO:0005996;GO:0006022;GO:0006023;GO:0006024;GO:0006040;GO:0006066;GO:0006139;GO:0006807;GO:0007049;GO:0008152;GO:0008360;GO:0009058;GO:0009059;GO:0009225;GO:0009252;GO:0009308;GO:0009987;GO:0010382;GO:0016051;GO:0019276;GO:0019277;GO:0022603;GO:0022604;GO:0030203;GO:0034637;GO:0034641;GO:0034645;GO:0043170;GO:0044036;GO:0044038;GO:0044237;GO:0044238;GO:…	GO:0003824;GO:0008760;GO:0016740;GO:0016765	GO:0005737;GO:0044424;GO:0044464	ko00520;ko00550	323.31	0	44.686	310636672	308186656	308156672	258333328	1.75804	0.0686658	0.00446733	0.07716	0.00416756	2.54452	0.0802762	1.43264	0.0758088	0.00343216	-0.000299772	1.6371	0.0761086	Q9KP62	>sp|Q9KP62|MURA_VIBCH UDP-N-acetylglucosamine 1-carboxyvinyltransferase OS=Vibrio cholerae serotype O1 (strain ATCC 39315 / El Tor Inaba N16961) GN=murA PE=1 SV=1
8.34451	8.26816	8.32066	8.33856	8.28894	8.25166	8.19053	8.18384	8.22477	8.26033	8.27752	8.17099	+		+			+		biosynthetic process;cellular aromatic compound metabolic process;cellular biosynthetic process;cellular metabolic process;cellular nitrogen compound biosynthetic process;cellular nitrogen compound metabolic process;cellular process;'de novo' pyrimidine base biosynthetic process;heterocycle biosynthetic process;heterocycle metabolic process;metabolic process;nitrogen compound metabolic process;nu…	aspartate carbamoyltransferase activity;binding;carboxyl- or carbamoyltransferase activity;catalytic activity;cation binding;ion binding;metal ion binding;transferase activity;transferase activity, transferring one-carbon groups	aspartate carbamoyltransferase complex;cell part;macromolecular complex;protein complex	Alanine, aspartate and glutamate metabolism;Pyrimidine metabolism	GO:0006139;GO:0006206;GO:0006207;GO:0006220;GO:0006221;GO:0006725;GO:0006753;GO:0006807;GO:0008152;GO:0009058;GO:0009112;GO:0009117;GO:0009165;GO:0009218;GO:0009220;GO:0009259;GO:0009260;GO:0009987;GO:0018130;GO:0019856;GO:0034641;GO:0034654;GO:0044237;GO:0044238;GO:0044249;GO:0044271;GO:0044281;GO:0046112;GO:0046483;GO:0055086;GO:0072527;GO:0072528	GO:0003824;GO:0004070;GO:0005488;GO:0016740;GO:0016741;GO:0016743;GO:0043167;GO:0043169;GO:0046872	GO:0009347;GO:0032991;GO:0043234;GO:0044464	ko00240;ko00250	121.24	0	17.276	205243328	197023328	158520000	173273328	1.38103	0.206604	0.0180572	1.90012	0.1114	0.870909	0.0748288	0.61388	0.0567716	1.52888	0.0933428	0.444253	-0.0365712	Q9KP65	>sp|Q9KP65|PYRI_VIBCH Aspartate carbamoyltransferase regulatory chain OS=Vibrio cholerae serotype O1 (strain ATCC 39315 / El Tor Inaba N16961) GN=pyrI PE=3 SV=1
8.61045	8.57427	8.55191	8.54453	8.59131	8.56266	8.45057	8.48232	8.45676	8.49737	8.46598	8.49604	+		+	+	+	+		amine metabolic process;biosynthetic process;carboxylic acid metabolic process;cellular amine metabolic process;cellular amino acid metabolic process;cellular aromatic compound metabolic process;cellular biosynthetic process;cellular ketone metabolic process;cellular metabolic process;cellular nitrogen compound biosynthetic process;cellular nitrogen compound metabolic process;cellular process;'de…	amine binding;amino acid binding;aspartate carbamoyltransferase activity;binding;carboxyl- or carbamoyltransferase activity;carboxylic acid binding;catalytic activity;transferase activity;transferase activity, transferring one-carbon groups		Alanine, aspartate and glutamate metabolism;Pyrimidine metabolism	GO:0006082;GO:0006139;GO:0006206;GO:0006207;GO:0006213;GO:0006220;GO:0006221;GO:0006222;GO:0006520;GO:0006725;GO:0006753;GO:0006807;GO:0008152;GO:0009058;GO:0009112;GO:0009116;GO:0009117;GO:0009119;GO:0009123;GO:0009124;GO:0009129;GO:0009130;GO:0009156;GO:0009161;GO:0009165;GO:0009173;GO:0009174;GO:0009218;GO:0009220;GO:0009259;GO:0009260;GO:0009308;GO:0009987;GO:0018130;GO:0019752;GO:0019856;GO:…	GO:0003824;GO:0004070;GO:0005488;GO:0016597;GO:0016740;GO:0016741;GO:0016743;GO:0031406;GO:0043176		ko00240;ko00250	323.31	0	34.335	379796672	368633344	290693312	306693344	3.31138	0.228054	0.0127122	2.38231	0.115662	2.01322	0.0924139	2.02338	0.0797017	2.45134	0.10295	0.756738	-0.023248	Q9KP66	>sp|Q9KP66|PYRB_VIBCH Aspartate carbamoyltransferase OS=Vibrio cholerae serotype O1 (strain ATCC 39315 / El Tor Inaba N16961) GN=pyrB PE=3 SV=2
7.31867	7.29206	7.32056	7.34628	7.36109	7.39839	7.30546	7.25169	7.32133	7.0936	7.09844	7.16953	+	+		+	+	+	+		binding;catalytic activity;coenzyme binding;cofactor binding;NAD binding;nucleotide binding;oxidoreductase activity;oxidoreductase activity, acting on CH-OH group of donors;oxidoreductase activity, acting on the CH-OH group of donors, NAD or NADP as acceptor		Glycine, serine and threonine metabolism;Glyoxylate and dicarboxylate metabolism;Methane metabolism		GO:0000166;GO:0003824;GO:0005488;GO:0016491;GO:0016614;GO:0016616;GO:0048037;GO:0050662;GO:0051287		ko00260;ko00630;ko00680	116.93	0	35.45	20446666	23396000	19671334	13241333	4.13847	1.4933	-0.0581549	0.312816	0.0176039	2.71527	0.189909	2.98732	0.248064	1.35352	0.0757588	2.22333	0.172305	Q9KP72	>tr|Q9KP72|Q9KP72_VIBCH 2-hydroxyacid dehydrogenase family protein OS=Vibrio cholerae serotype O1 (strain ATCC 39315 / El Tor Inaba N16961) GN=VC_2504 PE=3 SV=1
8.86122	8.81458	8.79363	8.76658	8.75371	8.77942	8.69636	8.69452	8.61799	8.69563	8.67282	8.66989	+		+	+	+	+		amine metabolic process;amino acid activation;biological regulation;carboxylic acid metabolic process;cellular amine metabolic process;cellular amino acid metabolic process;cellular ketone metabolic process;cellular macromolecule metabolic process;cellular metabolic process;cellular nitrogen compound metabolic process;cellular process;macromolecule metabolic process;metabolic process;ncRNA metabo…	adenyl nucleotide binding;adenyl ribonucleotide binding;aminoacyl-tRNA editing activity;aminoacyl-tRNA ligase activity;ATP binding;binding;carboxylic ester hydrolase activity;catalytic activity;hydrolase activity;hydrolase activity, acting on ester bonds;ligase activity;ligase activity, forming aminoacyl-tRNA and related compounds;ligase activity, forming carbon-oxygen bonds;nucleotide binding;pu…	cell part;cytoplasm;intracellular part	Aminoacyl-tRNA biosynthesis;Valine, leucine and isoleucine biosynthesis	GO:0006082;GO:0006139;GO:0006399;GO:0006417;GO:0006418;GO:0006438;GO:0006448;GO:0006450;GO:0006520;GO:0006807;GO:0008152;GO:0009308;GO:0009889;GO:0009987;GO:0010468;GO:0010556;GO:0010608;GO:0016070;GO:0019222;GO:0019752;GO:0031323;GO:0031326;GO:0032268;GO:0034641;GO:0034660;GO:0042180;GO:0043038;GO:0043039;GO:0043170;GO:0043436;GO:0044106;GO:0044237;GO:0044238;GO:0044260;GO:0044281;GO:0050789;GO:…	GO:0000166;GO:0002161;GO:0003824;GO:0004812;GO:0004832;GO:0005488;GO:0005524;GO:0016787;GO:0016788;GO:0016874;GO:0016875;GO:0016876;GO:0017076;GO:0030554;GO:0032553;GO:0032555;GO:0032559;GO:0035639;GO:0052689	GO:0005737;GO:0044424;GO:0044464	ko00290;ko00970	323.31	0	108.17	666913344	584380032	468946656	478189984	3.19916	1.24652	0.0565739	2.03195	0.153523	2.57893	0.143696	2.85998	0.0871216	1.64612	0.0969489	0.133721	-0.0098273	Q9KP73	>sp|Q9KP73|SYV_VIBCH Valine--tRNA ligase OS=Vibrio cholerae serotype O1 (strain ATCC 39315 / El Tor Inaba N16961) GN=valS PE=3 SV=1
7.56034	7.58643	7.55016	7.43465	7.37803	7.31888	7.639	7.61502	7.61394	7.53916	7.56696	7.56123	+	+	+		+	+	+	amine biosynthetic process;amine metabolic process;biosynthetic process;branched chain family amino acid biosynthetic process;branched chain family amino acid metabolic process;carboxylic acid biosynthetic process;carboxylic acid metabolic process;cellular amine metabolic process;cellular amino acid biosynthetic process;cellular amino acid metabolic process;cellular biosynthetic process;cellular …	3-isopropylmalate dehydratase activity;4 iron, 4 sulfur cluster binding;binding;carbon-oxygen lyase activity;catalytic activity;cation binding;hydro-lyase activity;ion binding;iron-sulfur cluster binding;lyase activity;metal cluster binding;metal ion binding	3-isopropylmalate dehydratase complex;cell part;cytoplasmic part;cytosolic part;intracellular part;macromolecular complex;protein complex	C5-Branched dibasic acid metabolism;Valine, leucine and isoleucine biosynthesis	GO:0006082;GO:0006520;GO:0006551;GO:0006807;GO:0008152;GO:0008652;GO:0009058;GO:0009081;GO:0009082;GO:0009098;GO:0009308;GO:0009309;GO:0009987;GO:0016053;GO:0019752;GO:0034641;GO:0042180;GO:0043436;GO:0044106;GO:0044237;GO:0044238;GO:0044249;GO:0044271;GO:0044281;GO:0044283;GO:0046394	GO:0003824;GO:0003861;GO:0005488;GO:0016829;GO:0016835;GO:0016836;GO:0043167;GO:0043169;GO:0046872;GO:0051536;GO:0051539;GO:0051540	GO:0009316;GO:0032991;GO:0043234;GO:0044424;GO:0044444;GO:0044445;GO:0044464	ko00290;ko00660	117.19	0	50.185	36805332	23974666	41957332	35970668	4.1229	2.23463	0.188454	1.86616	-0.0570122	0.290325	0.00985654	2.17995	-0.178598	2.68997	-0.245466	2.3236	0.0668688	Q9KP81	>sp|Q9KP81|LEUC_VIBCH 3-isopropylmalate dehydratase large subunit OS=Vibrio cholerae serotype O1 (strain ATCC 39315 / El Tor Inaba N16961) GN=leuC PE=3 SV=1
8.29092	8.27669	8.25479	8.25015	8.26273	8.1522	8.32164	8.35643	8.3355	8.33846	8.30194	8.3286	+		+	+		+		amine biosynthetic process;amine metabolic process;biosynthetic process;branched chain family amino acid biosynthetic process;branched chain family amino acid metabolic process;carboxylic acid biosynthetic process;carboxylic acid metabolic process;cellular amine metabolic process;cellular amino acid biosynthetic process;cellular amino acid metabolic process;cellular biosynthetic process;cellular …	3-isopropylmalate dehydrogenase activity;binding;catalytic activity;cation binding;coenzyme binding;cofactor binding;ion binding;magnesium ion binding;metal ion binding;NAD binding;nucleotide binding;oxidoreductase activity;oxidoreductase activity, acting on CH-OH group of donors;oxidoreductase activity, acting on the CH-OH group of donors, NAD or NADP as acceptor	cell part;cytoplasm;intracellular part	Valine, leucine and isoleucine biosynthesis	GO:0006082;GO:0006520;GO:0006551;GO:0006807;GO:0008152;GO:0008652;GO:0009058;GO:0009081;GO:0009082;GO:0009098;GO:0009308;GO:0009309;GO:0009987;GO:0016053;GO:0019752;GO:0034641;GO:0042180;GO:0043436;GO:0044106;GO:0044237;GO:0044238;GO:0044249;GO:0044271;GO:0044281;GO:0044283;GO:0046394	GO:0000166;GO:0000287;GO:0003824;GO:0003862;GO:0005488;GO:0016491;GO:0016614;GO:0016616;GO:0043167;GO:0043169;GO:0046872;GO:0048037;GO:0050662;GO:0051287	GO:0005737;GO:0044424;GO:0044464	ko00290	165.08	0	39.404	188100000	167660000	217816672	210510000	1.92175	0.649768	0.0524406	1.92172	-0.0637197	1.49361	-0.048865	1.2972	-0.101306	1.48018	-0.11616	0.426641	0.0148547	Q9KP82	>sp|Q9KP82|LEU3_VIBCH 3-isopropylmalate dehydrogenase OS=Vibrio cholerae serotype O1 (strain ATCC 39315 / El Tor Inaba N16961) GN=leuB PE=3 SV=1
7.97032	7.97787	7.99755	8.10212	8.12581	8.11926	7.96526	7.97562	7.94526	7.87707	7.90525	7.98299	+	+			+	+		amine biosynthetic process;amine metabolic process;biosynthetic process;branched chain family amino acid biosynthetic process;branched chain family amino acid metabolic process;carboxylic acid biosynthetic process;carboxylic acid metabolic process;cellular amine metabolic process;cellular amino acid biosynthetic process;cellular amino acid metabolic process;cellular biosynthetic process;cellular …	acetolactate synthase activity;binding;catalytic activity;cation binding;coenzyme binding;cofactor binding;flavin adenine dinucleotide binding;ion binding;magnesium ion binding;metal ion binding;thiamine pyrophosphate binding;transferase activity;transferase activity, transferring aldehyde or ketonic groups;vitamin binding		Butanoate metabolism;C5-Branched dibasic acid metabolism;Pantothenate and CoA biosynthesis;Valine, leucine and isoleucine biosynthesis	GO:0006082;GO:0006520;GO:0006549;GO:0006573;GO:0006807;GO:0008152;GO:0008652;GO:0009058;GO:0009081;GO:0009082;GO:0009097;GO:0009099;GO:0009308;GO:0009309;GO:0009987;GO:0016053;GO:0019752;GO:0034641;GO:0042180;GO:0043436;GO:0044106;GO:0044237;GO:0044238;GO:0044249;GO:0044271;GO:0044281;GO:0044283;GO:0046394	GO:0000287;GO:0003824;GO:0003984;GO:0005488;GO:0016740;GO:0016744;GO:0019842;GO:0030976;GO:0043167;GO:0043169;GO:0046872;GO:0048037;GO:0050660;GO:0050662		ko00290;ko00650;ko00660;ko00770	143.35	0	62.864	95955000	130570000	91670664	83968000	3.60007	3.61952	-0.133814	0.75787	0.0198671	0.854942	0.0601479	2.40488	0.193962	3.76119	0.153681	0.540577	0.0402808	Q9KP90	>tr|Q9KP90|Q9KP90_VIBCH Acetolactate synthase OS=Vibrio cholerae serotype O1 (strain ATCC 39315 / El Tor Inaba N16961) GN=VC_2483 PE=3 SV=1
7.90435	7.93724	7.92789	8.01957	7.82542	7.85092	7.7651	7.75668	7.70662	7.61206	7.6408	7.76433	+		+	+	+			amine catabolic process;amine metabolic process;carboxylic acid catabolic process;carboxylic acid metabolic process;catabolic process;cellular amine metabolic process;cellular amino acid catabolic process;cellular amino acid metabolic process;cellular catabolic process;cellular ketone metabolic process;cellular macromolecule metabolic process;cellular metabolic process;cellular nitrogen compound …	amine binding;amino acid binding;aminomethyltransferase activity;binding;carboxylic acid binding;catalytic activity;folic acid binding;methyltransferase activity;transferase activity;transferase activity, transferring one-carbon groups;vitamin binding	cell part;cytoplasm;intracellular part		GO:0006082;GO:0006139;GO:0006396;GO:0006399;GO:0006520;GO:0006544;GO:0006546;GO:0006807;GO:0008033;GO:0008152;GO:0009056;GO:0009063;GO:0009069;GO:0009071;GO:0009308;GO:0009310;GO:0009451;GO:0009987;GO:0016054;GO:0016070;GO:0019752;GO:0034470;GO:0034641;GO:0034660;GO:0042180;GO:0043170;GO:0043412;GO:0043436;GO:0044106;GO:0044237;GO:0044238;GO:0044248;GO:0044260;GO:0044281;GO:0044282;GO:0046395;GO:…	GO:0003824;GO:0004047;GO:0005488;GO:0005542;GO:0008168;GO:0016597;GO:0016740;GO:0016741;GO:0019842;GO:0031406;GO:0043176	GO:0005737;GO:0044424;GO:0044464		152.63	0	36.037	83825664	80818000	55406332	47594668	2.26027	0.147919	0.0245194	3.01895	0.180355	2.20225	0.250762	1.37594	0.226242	1.15245	0.155835	0.632655	0.0704066	Q9KPA1	>sp|Q9KPA1|YGFZ_VIBCH tRNA-modifying protein YgfZ OS=Vibrio cholerae serotype O1 (strain ATCC 39315 / El Tor Inaba N16961) GN=VC_2472 PE=3 SV=1
7.76215	7.75711	7.7548	7.76833	7.76489	7.71458	7.93618	7.95277	7.81737	7.93185	7.89682	7.88148	+		+	+	+	+		biosynthetic process;cellular biosynthetic process;cellular metabolic process;cellular nitrogen compound biosynthetic process;cellular nitrogen compound metabolic process;cellular process;coenzyme biosynthetic process;coenzyme metabolic process;cofactor biosynthetic process;cofactor metabolic process;heterocycle biosynthetic process;heterocycle metabolic process;metabolic process;NAD biosynthetic…	aspartate oxidase activity;catalytic activity;L-aspartate oxidase activity;L-aspartate:fumarate oxidoreductase activity;oxidoreductase activity;oxidoreductase activity, acting on the CH-NH2 group of donors;oxidoreductase activity, acting on the CH-NH2 group of donors, oxygen as acceptor	cell part;cytoplasm;intracellular part	Alanine, aspartate and glutamate metabolism;Nicotinate and nicotinamide metabolism	GO:0006139;GO:0006732;GO:0006733;GO:0006734;GO:0006753;GO:0006807;GO:0008152;GO:0009058;GO:0009108;GO:0009117;GO:0009165;GO:0009435;GO:0009987;GO:0018130;GO:0019359;GO:0019362;GO:0019363;GO:0019674;GO:0034641;GO:0034654;GO:0044237;GO:0044238;GO:0044249;GO:0044271;GO:0044281;GO:0046483;GO:0046496;GO:0051186;GO:0051188;GO:0055086;GO:0072524;GO:0072525	GO:0003824;GO:0008734;GO:0015922;GO:0016491;GO:0016638;GO:0016641;GO:0044318	GO:0005737;GO:0044424;GO:0044464	ko00250;ko00760	148.8	0	59.872	57283332	56227668	80566336	80149664	2.67874	0.191568	0.00875266	1.55413	-0.144088	3.19046	-0.145369	2.59605	-0.154122	1.53182	-0.152841	0.00933383	-0.00128078	Q9KPA4	>sp|Q9KPA4|NADB_VIBCH L-aspartate oxidase OS=Vibrio cholerae serotype O1 (strain ATCC 39315 / El Tor Inaba N16961) GN=nadB PE=3 SV=2
7.18398	7.21093	7.22497	7.14019	7.23401	7.26345	7.32525	7.31836	7.35976	7.47569	7.34451	7.40023	+		+	+	+	+			nucleic acid binding transcription factor activity;sequence-specific DNA binding transcription factor activity				GO:0001071;GO:0003700			71.522	0	36.165	16105000	16430667	21619000	25713000	2.62213	0.0521474	-0.00592089	2.72204	-0.127825	2.13197	-0.200178	1.66376	-0.194257	1.44156	-0.121904	0.836896	-0.0723529	Q9KPA8	>tr|Q9KPA8|Q9KPA8_VIBCH Sigma-E factor regulatory protein RseB OS=Vibrio cholerae serotype O1 (strain ATCC 39315 / El Tor Inaba N16961) GN=VC_2465 PE=4 SV=1
8.31296	8.32818	8.29232	8.23363	8.34906	8.34351	8.19036	8.19206	8.262	8.15927	8.14007	8.16741	+		+	+	+			biosynthetic process;cellular biosynthetic process;cellular metabolic process;cellular process;heterocycle metabolic process;metabolic process;pyridoxine biosynthetic process;pyridoxine metabolic process;small molecule biosynthetic process;small molecule metabolic process;vitamin B6 biosynthetic process;vitamin B6 metabolic process;vitamin biosynthetic process;vitamin metabolic process;water-solu…	catalytic activity;pyridoxine 5'-phosphate synthase activity;transferase activity;transferase activity, transferring nitrogenous groups	cell part;cytoplasm;intracellular part	Vitamin B6 metabolism	GO:0006766;GO:0006767;GO:0008152;GO:0008614;GO:0008615;GO:0009058;GO:0009110;GO:0009987;GO:0042364;GO:0042816;GO:0042819;GO:0044237;GO:0044249;GO:0044281;GO:0044283;GO:0046483	GO:0003824;GO:0016740;GO:0016769;GO:0033856	GO:0005737;GO:0044424;GO:0044464	ko00750	202.75	0	26.454	204833328	205063328	164480000	143130000	2.45632	0.0206721	0.00241884	1.69492	0.096344	3.53088	0.155572	1.78629	0.153153	0.992409	0.0939252	1.11619	0.0592283	Q9KPB5	>sp|Q9KPB5|PDXJ_VIBCH Pyridoxine 5-phosphate synthase OS=Vibrio cholerae serotype O1 (strain ATCC 39315 / El Tor Inaba N16961) GN=pdxJ PE=3 SV=1
7.21875	7.1854	7.16575	7.08707	7.24055	7.14576	6.82355	6.85005	6.71619	6.79121	6.86116	7.07755	+		+	+		+					Purine metabolism;Pyrimidine metabolism				ko00230;ko00240	20.633	0	32.087	15506667	14536000	6.31453e+06	8467300	2.70584	0.272608	0.0321728	3.07211	0.39337	1.48179	0.279991	1.19964	0.247818	2.39998	0.361197	0.522253	-0.113379	Q9KPC2	>tr|Q9KPC2|Q9KPC2_VIBCH MazG protein OS=Vibrio cholerae serotype O1 (strain ATCC 39315 / El Tor Inaba N16961) GN=VC_2450 PE=4 SV=1
7.48151	7.51828	7.55718	7.46228	7.52337	7.45384	7.55631	7.58543	7.41496	7.65972	7.67522	7.67201	+			+	+		+	amine metabolic process;biosynthetic process;carboxylic acid metabolic process;cellular amine metabolic process;cellular amino acid metabolic process;cellular biosynthetic process;cellular ketone metabolic process;cellular metabolic process;cellular nitrogen compound biosynthetic process;cellular nitrogen compound metabolic process;cellular process;CTP biosynthetic process;CTP metabolic process;'…	adenyl nucleotide binding;adenyl ribonucleotide binding;ATP binding;binding;catalytic activity;CTP synthase activity;ligase activity;ligase activity, forming carbon-nitrogen bonds;nucleotide binding;purine nucleotide binding;purine ribonucleoside triphosphate binding;purine ribonucleotide binding;ribonucleotide binding		Pyrimidine metabolism	GO:0006082;GO:0006139;GO:0006213;GO:0006220;GO:0006221;GO:0006241;GO:0006520;GO:0006541;GO:0006753;GO:0006807;GO:0008152;GO:0009058;GO:0009064;GO:0009116;GO:0009117;GO:0009119;GO:0009141;GO:0009142;GO:0009147;GO:0009148;GO:0009165;GO:0009199;GO:0009201;GO:0009208;GO:0009209;GO:0009218;GO:0009220;GO:0009259;GO:0009260;GO:0009308;GO:0009987;GO:0018130;GO:0019752;GO:0034641;GO:0034654;GO:0042180;GO:…	GO:0000166;GO:0003824;GO:0003883;GO:0005488;GO:0005524;GO:0016874;GO:0016879;GO:0017076;GO:0030554;GO:0032553;GO:0032555;GO:0032559;GO:0035639		ko00240	118.85	0	59.885	33120000	30265666	33499000	46669332	1.97709	0.561819	0.0391628	0.000526219	9.20296e-05	2.59059	-0.149989	2.96692	-0.189152	0.27501	-0.0390708	1.32883	-0.150081	Q9KPC4	>sp|Q9KPC4|PYRG_VIBCH CTP synthase OS=Vibrio cholerae serotype O1 (strain ATCC 39315 / El Tor Inaba N16961) GN=pyrG PE=3 SV=3
6.83317	6.83092	6.75676	6.37458	6.46568	6.46279	6.44714	6.62	NaN	6.75613	6.72633	NaN	+	+	+		+											54.231	0	26.076	6.43237e+06	2.73123e+06	2.32287e+06	3.67617e+06	2.8315	3.17212	0.372599	1.49214	0.273377	0.821417	0.0657182	2.33217	-0.306881	0.555719	-0.0992215	0.849297	-0.207659	Q9KPD1	>tr|Q9KPD1|Q9KPD1_VIBCH Uncharacterized protein OS=Vibrio cholerae serotype O1 (strain ATCC 39315 / El Tor Inaba N16961) GN=VC_2441 PE=4 SV=1
7.31792	7.30479	7.23124	7.37451	7.41244	7.4421	7.35268	7.30142	7.36088	7.21235	7.29627	7.30116	+	+			+			cellular macromolecule metabolic process;cellular metabolic process;cellular nitrogen compound metabolic process;cellular process;cellular response to stimulus;cellular response to stress;DNA metabolic process;DNA repair;macromolecule metabolic process;metabolic process;nitrogen compound metabolic process;nucleic acid metabolic process;nucleobase-containing compound metabolic process;primary meta…	binding;catalytic activity;cation binding;hydrolase activity;hydrolase activity, acting on acid anhydrides;hydrolase activity, acting on acid anhydrides, in phosphorus-containing anhydrides;ion binding;metal ion binding		Purine metabolism	GO:0006139;GO:0006259;GO:0006281;GO:0006807;GO:0006950;GO:0006974;GO:0008152;GO:0009987;GO:0033554;GO:0034641;GO:0043170;GO:0044237;GO:0044238;GO:0044260;GO:0050896;GO:0051716;GO:0090304	GO:0003824;GO:0005488;GO:0016787;GO:0016817;GO:0016818;GO:0043167;GO:0043169;GO:0046872		ko00230	75.955	0	23.568	19332666	25737334	21833000	18698000	1.90063	1.70115	-0.125036	0.752708	-0.0536776	0.137819	0.0147238	1.79673	0.13976	1.24124	0.0713584	0.932045	0.0684013	Q9KPD5	>tr|Q9KPD5|Q9KPD5_VIBCH MutT/nudix family protein OS=Vibrio cholerae serotype O1 (strain ATCC 39315 / El Tor Inaba N16961) GN=VC_2435 PE=4 SV=1
7.01026	7.01271	7.13925	6.97259	7.01258	7.03254	7.21603	7.23132	7.17883	7.15433	7.24817	7.26914	+		+	+	+	+										12.003	0	22.272	11438667	10153433	16191333	16853000	2.74679	0.449731	0.0481693	1.56812	-0.154655	1.42822	-0.169808	2.28053	-0.217977	3.00199	-0.202825	0.145961	-0.0151526	Q9KPD8	>tr|Q9KPD8|Q9KPD8_VIBCH Uncharacterized protein OS=Vibrio cholerae serotype O1 (strain ATCC 39315 / El Tor Inaba N16961) GN=VC_2432 PE=4 SV=1
7.93878	7.95182	7.95345	8.01326	8.0383	7.96467	7.8619	7.92176	7.91322	7.84655	7.81217	7.8696	+			+	+	+		biosynthetic process;cellular biosynthetic process;cellular metabolic process;cellular nitrogen compound biosynthetic process;cellular nitrogen compound metabolic process;cellular process;coenzyme biosynthetic process;coenzyme metabolic process;cofactor biosynthetic process;cofactor metabolic process;heterocycle biosynthetic process;heterocycle metabolic process;metabolic process;NAD biosynthetic…	catalytic activity;nicotinate-nucleotide diphosphorylase (carboxylating) activity;transferase activity;transferase activity, transferring glycosyl groups;transferase activity, transferring pentosyl groups		Nicotinate and nicotinamide metabolism	GO:0006139;GO:0006732;GO:0006733;GO:0006734;GO:0006739;GO:0006753;GO:0006807;GO:0008152;GO:0009058;GO:0009108;GO:0009117;GO:0009165;GO:0009435;GO:0009987;GO:0018130;GO:0019359;GO:0019362;GO:0019363;GO:0019674;GO:0034641;GO:0034654;GO:0044237;GO:0044238;GO:0044249;GO:0044271;GO:0044281;GO:0046483;GO:0046496;GO:0051186;GO:0051188;GO:0055086;GO:0072524;GO:0072525	GO:0003824;GO:0004514;GO:0016740;GO:0016757;GO:0016763		ko00760	280.49	0	32.051	88729336	101502336	79387336	69728664	3.12478	1.21967	-0.0573926	1.19724	0.0490602	2.4311	0.105244	2.39919	0.162637	1.69073	0.106453	1.05356	0.0561843	Q9KPE6	>tr|Q9KPE6|Q9KPE6_VIBCH Nicotinate-nucleotide pyrophosphorylase, carboxylating OS=Vibrio cholerae serotype O1 (strain ATCC 39315 / El Tor Inaba N16961) GN=VC_2422 PE=1 SV=1
6.59391	6.84586	6.68557	6.73958	6.85034	6.72112	7.01808	7.05862	6.99043	6.93976	6.95428	6.86998	+		+		+	+	+	cellular macromolecule metabolic process;cellular metabolic process;cellular nitrogen compound metabolic process;cellular process;cellular response to stimulus;cellular response to stress;DNA metabolic process;DNA recombination;DNA repair;macromolecule metabolic process;metabolic process;nitrogen compound metabolic process;nucleic acid metabolic process;nucleobase-containing compound metabolic pr…	5'-3' exonuclease activity;binding;catalytic activity;cation binding;deoxyribonuclease activity;exodeoxyribonuclease activity;exodeoxyribonuclease activity, producing 5'-phosphomonoesters;exonuclease activity;exonuclease activity, active with either ribo- or deoxyribonucleic acids and producing 5'-phosphomonoesters;hydrolase activity;hydrolase activity, acting on ester bonds;ion binding;manganese…		Base excision repair;Homologous recombination;Mismatch repair	GO:0006139;GO:0006259;GO:0006281;GO:0006310;GO:0006807;GO:0006950;GO:0006974;GO:0008152;GO:0009987;GO:0033554;GO:0034641;GO:0043170;GO:0044237;GO:0044238;GO:0044260;GO:0050896;GO:0051716;GO:0090304	GO:0003676;GO:0003824;GO:0004518;GO:0004527;GO:0004529;GO:0004536;GO:0005488;GO:0008297;GO:0008409;GO:0016787;GO:0016788;GO:0016796;GO:0016895;GO:0030145;GO:0043167;GO:0043169;GO:0046872;GO:0046914		ko03410;ko03430;ko03440	48.042	0	64.829	5262000	5.94557e+06	10550700	8372800	2.35957	0.29941	-0.0619	1.83439	-0.313929	1.27864	-0.212895	1.45985	-0.150995	2.30376	-0.252029	1.43678	0.101034	Q9KPF1	>tr|Q9KPF1|Q9KPF1_VIBCH Single-stranded-DNA-specific exonuclease RecJ OS=Vibrio cholerae serotype O1 (strain ATCC 39315 / El Tor Inaba N16961) GN=VC_2417 PE=4 SV=1
7.35199	7.26581	7.26274	6.97595	7.03003	7.12248	8.03036	8.07243	8.05454	7.99501	7.9846	8.03551	+	+	+	+	+	+		catabolic process;cellular catabolic process;cellular metabolic process;cellular nitrogen compound catabolic process;cellular nitrogen compound metabolic process;cellular process;metabolic process;nitrogen compound metabolic process;nucleobase-containing compound catabolic process;nucleobase-containing compound metabolic process;nucleobase-containing small molecule metabolic process;nucleoside ph…	2',3'-cyclic-nucleotide 2'-phosphodiesterase activity;binding;catalytic activity;cation binding;cyclic-nucleotide phosphodiesterase activity;hydrolase activity;hydrolase activity, acting on ester bonds;ion binding;metal ion binding;nucleotide binding;phosphoric diester hydrolase activity;phosphoric ester hydrolase activity		Purine metabolism;Pyrimidine metabolism	GO:0006139;GO:0006753;GO:0006807;GO:0008152;GO:0009056;GO:0009117;GO:0009166;GO:0009987;GO:0034641;GO:0034655;GO:0044237;GO:0044238;GO:0044248;GO:0044270;GO:0044281;GO:0055086	GO:0000166;GO:0003824;GO:0004112;GO:0005488;GO:0008081;GO:0008663;GO:0016787;GO:0016788;GO:0042578;GO:0043167;GO:0043169;GO:0046872		ko00230;ko00240	287.94	0	70.581	19748000	11145100	112923336	101298336	8.02127	2.07487	0.250691	4.74392	-0.758931	4.5566	-0.711531	4.52897	-0.962221	4.65132	-1.00962	1.12916	0.0474003	Q9KPF2	>tr|Q9KPF2|Q9KPF2_VIBCH 2`,3`-cyclic-nucleotide 2`-phosphodiesterase, putative OS=Vibrio cholerae serotype O1 (strain ATCC 39315 / El Tor Inaba N16961) GN=VC_2416 PE=3 SV=1
8.5561	8.49159	8.54716	8.44397	8.39898	8.4781	8.46601	8.50817	8.45327	8.45886	8.41322	8.43762	+	+		+				acetyl-CoA biosynthetic process;acetyl-CoA biosynthetic process from pyruvate;acetyl-CoA metabolic process;alcohol catabolic process;alcohol metabolic process;biosynthetic process;carbohydrate catabolic process;carbohydrate metabolic process;carboxylic acid metabolic process;catabolic process;cellular biosynthetic process;cellular carbohydrate catabolic process;cellular carbohydrate metabolic pro…	acetyltransferase activity;catalytic activity;dihydrolipoamide S-acyltransferase activity;dihydrolipoyllysine-residue acetyltransferase activity;S-acetyltransferase activity;S-acyltransferase activity;transferase activity;transferase activity, transferring acyl groups;transferase activity, transferring acyl groups other than amino-acyl groups	cell part;cytoplasmic part;cytosolic pyruvate dehydrogenase complex;intracellular part;macromolecular complex;protein complex;pyruvate dehydrogenase complex	Citrate cycle (TCA cycle);Glycolysis / Gluconeogenesis;Pyruvate metabolism	GO:0005975;GO:0005996;GO:0006006;GO:0006007;GO:0006066;GO:0006082;GO:0006084;GO:0006085;GO:0006086;GO:0006090;GO:0006091;GO:0006096;GO:0006732;GO:0008152;GO:0009056;GO:0009058;GO:0009108;GO:0009987;GO:0016052;GO:0019318;GO:0019320;GO:0019752;GO:0032787;GO:0042180;GO:0043436;GO:0044237;GO:0044238;GO:0044249;GO:0044262;GO:0044275;GO:0044281;GO:0044282;GO:0046164;GO:0046365;GO:0051186;GO:0051188	GO:0003824;GO:0004742;GO:0016407;GO:0016417;GO:0016418;GO:0016740;GO:0016746;GO:0016747;GO:0030523	GO:0032991;GO:0043234;GO:0044424;GO:0044444;GO:0044464;GO:0045250;GO:0045254	ko00010;ko00020;ko00620	323.31	0	66.075	340830016	276410016	299540000	273506656	1.64345	1.3939	0.0912631	1.00205	0.0557985	1.77155	0.095046	0.0490823	0.00378291	0.555632	-0.0354646	0.861174	0.0392475	Q9KPF5	>tr|Q9KPF5|Q9KPF5_VIBCH Acetyltransferase component of pyruvate dehydrogenase complex OS=Vibrio cholerae serotype O1 (strain ATCC 39315 / El Tor Inaba N16961) GN=VC_2413 PE=3 SV=1
7.3022	7.37756	7.39766	7.37218	7.3376	7.34842	7.20984	7.1807	7.17748	7.23815	7.22123	7.21288	+		+	+	+	+		amine metabolic process;aminoglycan biosynthetic process;aminoglycan metabolic process;biological regulation;biosynthetic process;carbohydrate biosynthetic process;carbohydrate metabolic process;cell cycle;cell division;cell wall macromolecule biosynthetic process;cell wall macromolecule metabolic process;cell wall organization or biogenesis;cellular biosynthetic process;cellular cell wall macrom…	acid-amino acid ligase activity;adenyl nucleotide binding;adenyl ribonucleotide binding;ATP binding;binding;catalytic activity;ligase activity;ligase activity, forming carbon-nitrogen bonds;nucleotide binding;purine nucleotide binding;purine ribonucleoside triphosphate binding;purine ribonucleotide binding;ribonucleotide binding;UDP-N-acetylmuramoylalanyl-D-glutamyl-2,6-diaminopimelate-D-alanyl-D…	cell part;cytoplasm;intracellular part	Lysine biosynthesis;Peptidoglycan biosynthesis	GO:0000270;GO:0000271;GO:0005975;GO:0005976;GO:0006022;GO:0006023;GO:0006024;GO:0006807;GO:0007049;GO:0008152;GO:0008360;GO:0009058;GO:0009059;GO:0009252;GO:0009308;GO:0009987;GO:0010382;GO:0016051;GO:0022603;GO:0022604;GO:0030203;GO:0034645;GO:0043170;GO:0044036;GO:0044038;GO:0044237;GO:0044238;GO:0044249;GO:0044260;GO:0050789;GO:0050793;GO:0050794;GO:0051128;GO:0051301;GO:0065007;GO:0065008;GO:…	GO:0000166;GO:0003824;GO:0005488;GO:0005524;GO:0008766;GO:0016874;GO:0016879;GO:0016881;GO:0017076;GO:0030554;GO:0032553;GO:0032555;GO:0032559;GO:0035639;GO:0047480	GO:0005737;GO:0044424;GO:0044464	ko00300;ko00550	141.08	0	47.931	22964000	22541000	15473333	16757667	3.83947	0.0729861	0.00640949	2.27592	0.169803	1.96673	0.135056	3.28127	0.128646	3.45206	0.163394	1.28356	-0.0347476	Q9KPG3	>tr|Q9KPG3|Q9KPG3_VIBCH UDP-N-acetylmuramoyl-tripeptide--D-alanyl-D-alanine ligase OS=Vibrio cholerae serotype O1 (strain ATCC 39315 / El Tor Inaba N16961) GN=murF PE=3 SV=1
6.46465	6.43588	6.4787	6.62367	6.63933	6.56123	6.45918	6.53284	6.52407	6.6959	6.54401	6.5473	+	+				+		biological regulation;cellular process;cytokinesis;regulation of anatomical structure morphogenesis;regulation of biological process;regulation of biological quality;regulation of cell morphogenesis;regulation of cell shape;regulation of cellular component organization;regulation of cellular process;regulation of developmental process			Cell cycle - Caulobacter	GO:0000910;GO:0008360;GO:0009987;GO:0022603;GO:0022604;GO:0050789;GO:0050793;GO:0050794;GO:0051128;GO:0065007;GO:0065008			ko04112	76.124	0	45.571	2.88473e+06	4.06787e+06	3210600	3996800	1.60355	2.27291	-0.148335	0.797577	-0.0456233	1.23643	-0.135992	0.0783949	0.0123434	1.4346	0.102712	0.751892	-0.0903687	Q9KPH0	>tr|Q9KPH0|Q9KPH0_VIBCH Cell division protein FtsA OS=Vibrio cholerae serotype O1 (strain ATCC 39315 / El Tor Inaba N16961) GN=ftsA PE=3 SV=1
7.60605	7.65077	7.72713	7.6193	7.62824	7.6675	7.53743	7.59601	7.45664	7.60495	7.5877	7.57651	+				+			asexual reproduction;barrier septum formation;cellular component assembly;cellular component assembly at cellular level;cellular component organization;cellular component organization at cellular level;cellular component organization or biogenesis;cellular component organization or biogenesis at cellular level;cellular macromolecular complex assembly;cellular macromolecular complex subunit organi…	binding;catalytic activity;GTP binding;GTPase activity;guanyl nucleotide binding;guanyl ribonucleotide binding;hydrolase activity;hydrolase activity, acting on acid anhydrides;hydrolase activity, acting on acid anhydrides, in phosphorus-containing anhydrides;nucleoside-triphosphatase activity;nucleotide binding;purine nucleotide binding;purine ribonucleoside triphosphate binding;purine ribonucleo…	cell division site;cell part;cytoplasm;intracellular part;macromolecular complex;protein complex	Cell cycle - Caulobacter	GO:0000003;GO:0000910;GO:0000917;GO:0006461;GO:0009987;GO:0016043;GO:0019954;GO:0022607;GO:0032505;GO:0032506;GO:0034621;GO:0034622;GO:0043093;GO:0043623;GO:0043933;GO:0051258;GO:0065003;GO:0071822;GO:0071840;GO:0071841;GO:0071842;GO:0071844	GO:0000166;GO:0003824;GO:0003924;GO:0005488;GO:0005525;GO:0016462;GO:0016787;GO:0016817;GO:0016818;GO:0017076;GO:0017111;GO:0019001;GO:0032553;GO:0032555;GO:0032561;GO:0035639	GO:0005737;GO:0032153;GO:0032991;GO:0043234;GO:0044424;GO:0044464	ko04112	172.64	0	41.528	46155332	43536668	34178000	38893668	1.34862	0.235669	0.02297	1.15009	0.131289	0.921295	0.0715947	1.34121	0.0486247	1.18344	0.108318	0.654944	-0.0596938	Q9KPH1	>tr|Q9KPH1|Q9KPH1_VIBCH Cell division protein FtsZ OS=Vibrio cholerae serotype O1 (strain ATCC 39315 / El Tor Inaba N16961) GN=ftsZ PE=3 SV=1
7.69084	7.71368	7.72042	7.70446	7.71013	7.76292	7.83232	7.87381	7.86364	7.97033	7.9884	7.91265	+		+	+	+	+	+	cellular process;establishment of localization;establishment of localization in cell;establishment of protein localization;intracellular protein transmembrane transport;intracellular protein transport;intracellular transport;protein import;protein secretion;protein targeting;protein transmembrane transport;protein transport;secretion;secretion by cell;transmembrane transport;transport	adenyl nucleotide binding;adenyl ribonucleotide binding;ATP binding;binding;cation binding;ion binding;metal ion binding;nucleotide binding;purine nucleotide binding;purine ribonucleoside triphosphate binding;purine ribonucleotide binding;ribonucleotide binding	cell part;cytoplasm;intracellular part;membrane;plasma membrane	Bacterial secretion system;Protein export	GO:0006605;GO:0006810;GO:0006886;GO:0009306;GO:0009987;GO:0015031;GO:0017038;GO:0032940;GO:0045184;GO:0046903;GO:0046907;GO:0051234;GO:0051649;GO:0055085;GO:0065002;GO:0071806	GO:0000166;GO:0005488;GO:0005524;GO:0017076;GO:0030554;GO:0032553;GO:0032555;GO:0032559;GO:0035639;GO:0043167;GO:0043169;GO:0046872	GO:0005737;GO:0005886;GO:0016020;GO:0044424;GO:0044464	ko03060;ko03070	323.31	0	102.47	51109332	53289668	71936336	90847336	4.7929	0.352491	-0.0175179	3.19079	-0.148275	3.27397	-0.248811	2.84683	-0.231293	2.36632	-0.130757	1.74199	-0.100536	Q9KPH4	>sp|Q9KPH4|SECA_VIBCH Protein translocase subunit SecA OS=Vibrio cholerae serotype O1 (strain ATCC 39315 / El Tor Inaba N16961) GN=secA PE=3 SV=1
7.57245	7.63031	7.61827	7.63098	7.58147	7.67253	7.83902	7.97988	8.03274	7.82041	7.84175	7.87365	+		+	+	+	+		amine biosynthetic process;amine catabolic process;amine metabolic process;arginine biosynthetic process;arginine metabolic process;biosynthetic process;carbamoyl phosphate biosynthetic process;carbamoyl phosphate metabolic process;carboxylic acid biosynthetic process;carboxylic acid catabolic process;carboxylic acid metabolic process;catabolic process;cellular amine metabolic process;cellular am…	adenyl nucleotide binding;adenyl ribonucleotide binding;ATP binding;binding;carbamoyl-phosphate synthase (glutamine-hydrolyzing) activity;carbon-nitrogen ligase activity, with glutamine as amido-N-donor;catalytic activity;ligase activity;ligase activity, forming carbon-nitrogen bonds;nucleotide binding;purine nucleotide binding;purine ribonucleoside triphosphate binding;purine ribonucleotide bind…		Alanine, aspartate and glutamate metabolism;Pyrimidine metabolism	GO:0006082;GO:0006139;GO:0006213;GO:0006220;GO:0006221;GO:0006222;GO:0006520;GO:0006525;GO:0006526;GO:0006541;GO:0006543;GO:0006753;GO:0006807;GO:0008152;GO:0008652;GO:0009056;GO:0009058;GO:0009063;GO:0009064;GO:0009065;GO:0009084;GO:0009116;GO:0009117;GO:0009119;GO:0009123;GO:0009124;GO:0009129;GO:0009130;GO:0009156;GO:0009161;GO:0009165;GO:0009173;GO:0009174;GO:0009218;GO:0009220;GO:0009259;GO:…	GO:0000166;GO:0003824;GO:0004088;GO:0005488;GO:0005524;GO:0016874;GO:0016879;GO:0016884;GO:0017076;GO:0030554;GO:0032553;GO:0032555;GO:0032559;GO:0035639		ko00240;ko00250	191.43	0	40.922	40524332	42649668	90776336	70116336	3.6599	0.269357	-0.0213178	2.32514	-0.343536	3.27698	-0.238257	2.68358	-0.216939	2.14764	-0.322218	0.814247	0.105279	Q9KPH8	>sp|Q9KPH8|CARA_VIBCH Carbamoyl-phosphate synthase small chain OS=Vibrio cholerae serotype O1 (strain ATCC 39315 / El Tor Inaba N16961) GN=carA PE=3 SV=1
8.13472	8.1494	8.17975	8.17898	8.19959	8.13707	8.4128	8.46623	8.40478	8.37035	8.4087	8.43473	+		+	+	+	+		amine biosynthetic process;amine metabolic process;arginine biosynthetic process;arginine metabolic process;biosynthetic process;carboxylic acid biosynthetic process;carboxylic acid metabolic process;cellular amine metabolic process;cellular amino acid biosynthetic process;cellular amino acid metabolic process;cellular biosynthetic process;cellular ketone metabolic process;cellular metabolic proc…	adenyl nucleotide binding;adenyl ribonucleotide binding;ATP binding;binding;carbamoyl-phosphate synthase (glutamine-hydrolyzing) activity;carbon-nitrogen ligase activity, with glutamine as amido-N-donor;catalytic activity;cation binding;ion binding;ligase activity;ligase activity, forming carbon-nitrogen bonds;magnesium ion binding;manganese ion binding;metal ion binding;nucleotide binding;purine…		Alanine, aspartate and glutamate metabolism;Pyrimidine metabolism	GO:0006082;GO:0006139;GO:0006213;GO:0006220;GO:0006221;GO:0006222;GO:0006520;GO:0006525;GO:0006526;GO:0006753;GO:0006807;GO:0008152;GO:0008652;GO:0009058;GO:0009064;GO:0009084;GO:0009116;GO:0009117;GO:0009119;GO:0009123;GO:0009124;GO:0009129;GO:0009130;GO:0009156;GO:0009161;GO:0009165;GO:0009173;GO:0009174;GO:0009218;GO:0009220;GO:0009259;GO:0009260;GO:0009308;GO:0009309;GO:0009987;GO:0016053;GO:…	GO:0000166;GO:0000287;GO:0003824;GO:0004088;GO:0005488;GO:0005524;GO:0016874;GO:0016879;GO:0016884;GO:0017076;GO:0030145;GO:0030554;GO:0032553;GO:0032555;GO:0032559;GO:0035639;GO:0043167;GO:0043169;GO:0046872;GO:0046914		ko00240;ko00250	323.31	0	117.91	142900000	148816672	268413328	254326672	5.34547	0.310608	-0.0172539	3.51222	-0.273311	3.39626	-0.249966	3.04988	-0.232712	3.18305	-0.256057	0.362656	0.023345	Q9KPH9	>sp|Q9KPH9|CARB_VIBCH Carbamoyl-phosphate synthase large chain OS=Vibrio cholerae serotype O1 (strain ATCC 39315 / El Tor Inaba N16961) GN=carB PE=3 SV=1
7.58447	7.73443	7.52224	7.35149	7.48293	7.55381	7.66038	7.70443	7.7712	7.64466	7.52798	7.63035	+					+		amine biosynthetic process;amine metabolic process;amino acid salvage;aspartate family amino acid biosynthetic process;aspartate family amino acid metabolic process;biosynthetic process;carboxylic acid biosynthetic process;carboxylic acid metabolic process;catabolic process;cellular amine metabolic process;cellular amino acid biosynthetic process;cellular amino acid metabolic process;cellular bio…	adenosylhomocysteine nucleosidase activity;catalytic activity;hydrolase activity;hydrolase activity, acting on glycosyl bonds;hydrolase activity, hydrolyzing N-glycosyl compounds;methylthioadenosine nucleosidase activity;purine nucleosidase activity		Cysteine and methionine metabolism	GO:0000096;GO:0000097;GO:0006082;GO:0006139;GO:0006520;GO:0006555;GO:0006575;GO:0006732;GO:0006790;GO:0006807;GO:0008152;GO:0008652;GO:0009056;GO:0009058;GO:0009066;GO:0009067;GO:0009086;GO:0009116;GO:0009119;GO:0009164;GO:0009308;GO:0009309;GO:0009987;GO:0016053;GO:0019284;GO:0019509;GO:0019752;GO:0034641;GO:0034655;GO:0042180;GO:0042278;GO:0043094;GO:0043102;GO:0043436;GO:0044106;GO:0044237;GO:…	GO:0003824;GO:0008477;GO:0008782;GO:0008930;GO:0016787;GO:0016798;GO:0016799		ko00270	121.21	0	24.525	41983332	29554000	51809668	40180668	1.34817	0.807421	0.150969	0.625232	-0.098293	0.060465	0.0127149	0.926435	-0.138254	1.67929	-0.249262	1.06773	0.111008	Q9KPI8	>sp|Q9KPI8|MTNN_VIBCH 5-methylthioadenosine/S-adenosylhomocysteine nucleosidase OS=Vibrio cholerae serotype O1 (strain ATCC 39315 / El Tor Inaba N16961) GN=mtnN PE=1 SV=1
7.69926	7.64253	7.69907	7.74927	7.73132	7.72974	7.52826	7.55354	7.6127	7.60565	7.51138	7.58577	+	+	+	+	+	+		amine biosynthetic process;amine metabolic process;biosynthetic process;carboxylic acid biosynthetic process;carboxylic acid metabolic process;cellular amine metabolic process;cellular amino acid biosynthetic process;cellular amino acid metabolic process;cellular biosynthetic process;cellular ketone metabolic process;cellular metabolic process;cellular nitrogen compound biosynthetic process;cellu…	binding;catalytic activity;glutamate synthase (NADPH) activity;glutamate synthase activity;glutamate synthase activity, NADH or NADPH as acceptor;iron-sulfur cluster binding;metal cluster binding;oxidoreductase activity;oxidoreductase activity, acting on the CH-NH2 group of donors;oxidoreductase activity, acting on the CH-NH2 group of donors, NAD or NADP as acceptor		Alanine, aspartate and glutamate metabolism;Nitrogen metabolism	GO:0006082;GO:0006520;GO:0006536;GO:0006537;GO:0006807;GO:0008152;GO:0008652;GO:0009058;GO:0009064;GO:0009084;GO:0009308;GO:0009309;GO:0009987;GO:0016053;GO:0019752;GO:0034641;GO:0042180;GO:0043436;GO:0044106;GO:0044237;GO:0044238;GO:0044249;GO:0044271;GO:0044281;GO:0044283;GO:0046394	GO:0003824;GO:0004355;GO:0005488;GO:0015930;GO:0016491;GO:0016638;GO:0016639;GO:0045181;GO:0051536;GO:0051540		ko00250;ko00910	196.9	0	52.067	47984332	54558668	36837668	37107000	2.99673	1.32899	-0.056482	1.67494	0.115457	1.5162	0.112694	2.34637	0.169176	2.57988	0.171939	0.024278	-0.00276264	Q9KPJ0	>tr|Q9KPJ0|Q9KPJ0_VIBCH Glutamate synthase, small subunit OS=Vibrio cholerae serotype O1 (strain ATCC 39315 / El Tor Inaba N16961) GN=VC_2377 PE=4 SV=1
8.43873	8.41306	8.39775	8.43342	8.38705	8.30732	8.25928	8.19841	8.18769	8.25329	8.24047	8.27953	+		+	+	+	+		amine biosynthetic process;amine metabolic process;biosynthetic process;carboxylic acid biosynthetic process;carboxylic acid metabolic process;cellular amine metabolic process;cellular amino acid biosynthetic process;cellular amino acid metabolic process;cellular biosynthetic process;cellular ketone metabolic process;cellular metabolic process;cellular nitrogen compound biosynthetic process;cellu…	catalytic activity;glutamate synthase (NADPH) activity;glutamate synthase activity;glutamate synthase activity, NADH or NADPH as acceptor;oxidoreductase activity;oxidoreductase activity, acting on the CH-NH2 group of donors;oxidoreductase activity, acting on the CH-NH2 group of donors, NAD or NADP as acceptor		Alanine, aspartate and glutamate metabolism;Nitrogen metabolism	GO:0006082;GO:0006520;GO:0006536;GO:0006537;GO:0006807;GO:0008152;GO:0008652;GO:0009058;GO:0009064;GO:0009084;GO:0009308;GO:0009309;GO:0009987;GO:0016053;GO:0019752;GO:0034641;GO:0042180;GO:0043436;GO:0044106;GO:0044237;GO:0044238;GO:0044249;GO:0044271;GO:0044281;GO:0044283;GO:0046394	GO:0003824;GO:0004355;GO:0015930;GO:0016491;GO:0016638;GO:0016639;GO:0045181		ko00250;ko00910	323.31	0	163.5	261123328	239336672	164546672	181163328	3.11199	0.451409	0.0405842	2.87005	0.201388	3.17679	0.158751	1.42555	0.118166	1.69473	0.160803	0.784161	-0.0426372	Q9KPJ1	>tr|Q9KPJ1|Q9KPJ1_VIBCH Glutamate synthase, large subunit OS=Vibrio cholerae serotype O1 (strain ATCC 39315 / El Tor Inaba N16961) GN=VC_2376 PE=4 SV=1
7.78285	7.73464	7.75515	7.55101	7.71978	7.65496	7.73224	7.79964	7.7892	7.77102	7.74414	7.79532	+							anaerobic respiration;biological regulation;biosynthetic process;cellular biosynthetic process;cellular macromolecule biosynthetic process;cellular macromolecule metabolic process;cellular metabolic process;cellular nitrogen compound metabolic process;cellular process;cellular respiration;energy derivation by oxidation of organic compounds;generation of precursor metabolites and energy;macromolec…	binding;DNA binding;molecular transducer activity;nucleic acid binding;signal transducer activity;two-component response regulator activity		Two-component system	GO:0006091;GO:0006139;GO:0006351;GO:0006355;GO:0006807;GO:0008152;GO:0009058;GO:0009059;GO:0009061;GO:0009889;GO:0009987;GO:0010468;GO:0010556;GO:0015980;GO:0016070;GO:0019219;GO:0019222;GO:0031323;GO:0031326;GO:0032774;GO:0034641;GO:0034645;GO:0043170;GO:0044237;GO:0044238;GO:0044249;GO:0044260;GO:0045333;GO:0050789;GO:0050794;GO:0051171;GO:0051252;GO:0055114;GO:0060255;GO:0065007;GO:0080090;GO:…	GO:0000156;GO:0003676;GO:0003677;GO:0004871;GO:0005488;GO:0060089		ko02020	226.68	0	27.118	57279332	44400000	59523668	58974332	1.48324	1.06342	0.115629	0.254787	-0.0161476	0.245083	-0.0126131	1.17472	-0.128242	1.15977	-0.131777	0.0472049	0.00353448	Q9KPJ9	>tr|Q9KPJ9|Q9KPJ9_VIBCH Aerobic respiration control protein FexA OS=Vibrio cholerae serotype O1 (strain ATCC 39315 / El Tor Inaba N16961) GN=VC_2368 PE=4 SV=1
7.86702	7.95439	7.89884	7.78327	7.84689	7.89964	7.54243	7.46364	7.53306	7.50975	7.39173	7.39356	+		+	+	+	+		amine biosynthetic process;amine metabolic process;aspartate family amino acid biosynthetic process;aspartate family amino acid metabolic process;biosynthetic process;carboxylic acid biosynthetic process;carboxylic acid metabolic process;cellular amine metabolic process;cellular amino acid biosynthetic process;cellular amino acid metabolic process;cellular biosynthetic process;cellular ketone met…	adenyl nucleotide binding;adenyl ribonucleotide binding;amino acid kinase activity;ATP binding;binding;catalytic activity;homoserine kinase activity;kinase activity;nucleotide binding;phosphotransferase activity, alcohol group as acceptor;purine nucleotide binding;purine ribonucleoside triphosphate binding;purine ribonucleotide binding;ribonucleotide binding;transferase activity;transferase activ…	cell part;cytoplasm;intracellular part	Glycine, serine and threonine metabolism	GO:0006082;GO:0006520;GO:0006566;GO:0006807;GO:0008152;GO:0008652;GO:0009058;GO:0009066;GO:0009067;GO:0009088;GO:0009308;GO:0009309;GO:0009987;GO:0016053;GO:0019752;GO:0034641;GO:0042180;GO:0043436;GO:0044106;GO:0044237;GO:0044238;GO:0044249;GO:0044271;GO:0044281;GO:0044283;GO:0046394	GO:0000166;GO:0003824;GO:0004413;GO:0005488;GO:0005524;GO:0016301;GO:0016740;GO:0016772;GO:0016773;GO:0017076;GO:0019202;GO:0030554;GO:0032553;GO:0032555;GO:0032559;GO:0035639	GO:0005737;GO:0044424;GO:0044464	ko00260	128.5	0	34.295	80958664	70122664	32691666	27245000	5.01236	0.68356	0.0634839	3.41882	0.393709	3.28102	0.475071	2.8753	0.411587	2.85639	0.330225	0.813749	0.0813622	Q9KPK4	>sp|Q9KPK4|KHSE_VIBCH Homoserine kinase OS=Vibrio cholerae serotype O1 (strain ATCC 39315 / El Tor Inaba N16961) GN=thrB PE=3 SV=1
8.26867	8.23439	8.27228	8.27494	8.30343	8.32595	8.06513	8.04462	8.04825	7.86574	7.92802	7.9644	+		+	+	+	+	+	amine biosynthetic process;amine metabolic process;aspartate family amino acid biosynthetic process;aspartate family amino acid metabolic process;biosynthetic process;carboxylic acid biosynthetic process;carboxylic acid metabolic process;cellular amine metabolic process;cellular amino acid biosynthetic process;cellular amino acid metabolic process;cellular biosynthetic process;cellular ketone met…	binding;carbon-oxygen lyase activity;carbon-oxygen lyase activity, acting on phosphates;catalytic activity;cofactor binding;lyase activity;pyridoxal phosphate binding;threonine synthase activity;vitamin B6 binding;vitamin binding		Glycine, serine and threonine metabolism;Vitamin B6 metabolism	GO:0006082;GO:0006520;GO:0006566;GO:0006807;GO:0008152;GO:0008652;GO:0009058;GO:0009066;GO:0009067;GO:0009088;GO:0009308;GO:0009309;GO:0009987;GO:0016053;GO:0019752;GO:0034641;GO:0042180;GO:0043436;GO:0044106;GO:0044237;GO:0044238;GO:0044249;GO:0044271;GO:0044281;GO:0044283;GO:0046394	GO:0003824;GO:0004795;GO:0005488;GO:0016829;GO:0016835;GO:0016838;GO:0019842;GO:0030170;GO:0048037;GO:0070279		ko00260;ko00750	323.31	0	46.228	181460000	200420000	112916664	83421336	6.02162	1.05957	-0.0429926	3.95032	0.205783	3.38872	0.339061	3.53057	0.382054	3.99473	0.248775	1.97216	0.133279	Q9KPK5	>tr|Q9KPK5|Q9KPK5_VIBCH Threonine synthase OS=Vibrio cholerae serotype O1 (strain ATCC 39315 / El Tor Inaba N16961) GN=VC_2362 PE=4 SV=1
7.88537	7.87332	7.82907	7.8355	7.77878	7.75764	8.14585	8.07302	8.20623	7.92501	8.02202	8.1246	+		+		+	+			catalytic activity				GO:0003824			152.14	0	13.909	72988336	61929668	139666672	107524000	3.17121	1.17184	0.0719465	2.56935	-0.279115	1.25925	-0.161291	1.7015	-0.233237	2.83731	-0.351061	0.784223	0.117824	Q9KPK6	>sp|Q9KPK6|GRCA_VIBCH Autonomous glycyl radical cofactor OS=Vibrio cholerae serotype O1 (strain ATCC 39315 / El Tor Inaba N16961) GN=grcA PE=3 SV=1
7.28398	7.41784	7.32455	7.30033	7.33913	7.33179	7.09058	7.17304	7.11424	7.10823	7.06967	7.13808	+		+	+	+	+		cellular macromolecule metabolic process;cellular metabolic process;cellular nitrogen compound metabolic process;cellular process;cellular response to stimulus;cellular response to stress;DNA metabolic process;DNA repair;macromolecule metabolic process;metabolic process;nitrogen compound metabolic process;nucleic acid metabolic process;nucleobase-containing compound metabolic process;primary meta…	binding;catalytic activity;cation binding;deoxyribonuclease activity;deoxyribonuclease IV (phage-T4-induced) activity;DNA binding;endodeoxyribonuclease activity;endodeoxyribonuclease activity, producing 5'-phosphomonoesters;endonuclease activity;endonuclease activity, active with either ribo- or deoxyribonucleic acids and producing 5'-phosphomonoesters;hydrolase activity;hydrolase activity, actin…	cell part;intracellular	Base excision repair	GO:0006139;GO:0006259;GO:0006281;GO:0006807;GO:0006950;GO:0006974;GO:0008152;GO:0009987;GO:0033554;GO:0034641;GO:0043170;GO:0044237;GO:0044238;GO:0044260;GO:0050896;GO:0051716;GO:0090304	GO:0003676;GO:0003677;GO:0003824;GO:0004518;GO:0004519;GO:0004520;GO:0004536;GO:0005488;GO:0008270;GO:0008833;GO:0016787;GO:0016788;GO:0016888;GO:0016893;GO:0043167;GO:0043169;GO:0046872;GO:0046914	GO:0005622;GO:0044464	ko03410	41.587	0	31.702	22171666	21090000	13407667	12771000	3.59201	0.167472	0.0183692	2.0114	0.216169	2.22884	0.236797	3.15614	0.218427	2.71831	0.1978	0.26084	0.0206277	Q9KPK7	>sp|Q9KPK7|END4_VIBCH Probable endonuclease 4 OS=Vibrio cholerae serotype O1 (strain ATCC 39315 / El Tor Inaba N16961) GN=nfo PE=3 SV=1
7.17082	7.03937	7.0038	7.12798	7.02588	7.11551	7.27561	7.20858	7.19426	7.14342	7.19747	7.18509	+					+		base-excision repair;cellular macromolecule metabolic process;cellular metabolic process;cellular nitrogen compound metabolic process;cellular process;cellular response to stimulus;cellular response to stress;DNA metabolic process;DNA repair;macromolecule metabolic process;metabolic process;nitrogen compound metabolic process;nucleic acid metabolic process;nucleobase-containing compound metabolic…	catalytic activity;DNA N-glycosylase activity;hydrolase activity;hydrolase activity, acting on glycosyl bonds;hydrolase activity, hydrolyzing N-glycosyl compounds;uracil DNA N-glycosylase activity	cell part;cytoplasm;intracellular part	Base excision repair;Primary immunodeficiency	GO:0006139;GO:0006259;GO:0006281;GO:0006284;GO:0006807;GO:0006950;GO:0006974;GO:0008152;GO:0009987;GO:0033554;GO:0034641;GO:0043170;GO:0044237;GO:0044238;GO:0044260;GO:0050896;GO:0051716;GO:0090304	GO:0003824;GO:0004844;GO:0016787;GO:0016798;GO:0016799;GO:0019104	GO:0005737;GO:0044424;GO:0044464	ko03410;ko05340	38.011	0	25.446	11952000	12362667	16889666	14994667	1.4492	0.111176	-0.0184566	1.28175	-0.154818	0.909746	-0.103995	1.11506	-0.0855382	1.54172	-0.136361	0.783156	0.0508227	Q9KPK8	>sp|Q9KPK8|UNG_VIBCH Uracil-DNA glycosylase OS=Vibrio cholerae serotype O1 (strain ATCC 39315 / El Tor Inaba N16961) GN=ung PE=1 SV=1
7.64128	7.74335	7.71433	7.70712	7.73639	7.83892	7.4589	7.48872	7.49329	7.55824	7.55381	7.54583	+		+	+	+	+	+									274.22	0	28.86	50320000	58152332	30239000	35699000	3.70665	0.537641	-0.0611556	2.61366	0.219351	2.06542	0.147027	2.18261	0.208183	2.60666	0.280507	2.50292	-0.0723238	Q9KPL2	>sp|Q9KPL2|Y2355_VIBCH UPF0246 protein VC_2355 OS=Vibrio cholerae serotype O1 (strain ATCC 39315 / El Tor Inaba N16961) GN=VC_2355 PE=3 SV=1
8.33893	8.45076	8.384	8.22968	8.30829	8.31538	8.20156	8.28652	8.16014	8.25571	8.19176	8.31633	+		+	+				carbohydrate catabolic process;carbohydrate metabolic process;catabolic process;cellular catabolic process;cellular metabolic process;cellular nitrogen compound catabolic process;cellular nitrogen compound metabolic process;cellular process;deoxyribonucleotide catabolic process;deoxyribonucleotide metabolic process;deoxyribose phosphate catabolic process;deoxyribose phosphate metabolic process;me…	aldehyde-lyase activity;carbon-carbon lyase activity;catalytic activity;deoxyribose-phosphate aldolase activity;lyase activity	cell part;cytoplasm;intracellular part	Pentose phosphate pathway	GO:0005975;GO:0006139;GO:0006753;GO:0006807;GO:0008152;GO:0009056;GO:0009117;GO:0009166;GO:0009262;GO:0009264;GO:0009987;GO:0016052;GO:0019637;GO:0019692;GO:0034641;GO:0034655;GO:0044237;GO:0044238;GO:0044248;GO:0044270;GO:0044281;GO:0046386;GO:0046434;GO:0055086	GO:0003824;GO:0004139;GO:0016829;GO:0016830;GO:0016832	GO:0005737;GO:0044424;GO:0044464	ko00030	323.31	0	27.959	247556656	193263328	165693328	180953328	1.52263	1.18025	0.106778	1.62216	0.175154	1.32004	0.136631	0.26323	0.0298532	0.671066	0.0683762	0.30284	-0.038523	Q9KPL7	>sp|Q9KPL7|DEOC_VIBCH Deoxyribose-phosphate aldolase OS=Vibrio cholerae serotype O1 (strain ATCC 39315 / El Tor Inaba N16961) GN=deoC PE=3 SV=1
7.83328	7.82047	7.86889	7.81167	7.78824	7.83603	7.79371	7.76791	7.86934	7.72165	7.66645	7.75952	+			+	+			cellular aromatic compound metabolic process;cellular metabolic process;cellular nitrogen compound metabolic process;cellular process;heterocycle metabolic process;metabolic process;nitrogen compound metabolic process;nucleobase metabolic process;nucleobase-containing compound metabolic process;nucleobase-containing small molecule metabolic process;nucleoside metabolic process;primary metabolic p…	catalytic activity;phosphorylase activity;pyrimidine-nucleoside phosphorylase activity;thymidine phosphorylase activity;transferase activity;transferase activity, transferring glycosyl groups;transferase activity, transferring hexosyl groups;transferase activity, transferring pentosyl groups		Bladder cancer;Drug metabolism - other enzymes;Pyrimidine metabolism	GO:0006139;GO:0006206;GO:0006213;GO:0006725;GO:0006807;GO:0008152;GO:0009112;GO:0009116;GO:0009987;GO:0034641;GO:0044237;GO:0044238;GO:0044281;GO:0046483;GO:0055086;GO:0072527	GO:0003824;GO:0004645;GO:0009032;GO:0016154;GO:0016740;GO:0016757;GO:0016758;GO:0016763		ko00240;ko00983;ko05219	312.65	0	47.842	69401000	64926000	64936332	52184332	1.67196	0.653542	0.0288989	0.381043	0.030558	1.82022	0.125007	1.46943	0.0961086	0.0164722	0.00165908	1.09115	0.0944495	Q9KPL8	>sp|Q9KPL8|TYPH_VIBCH Thymidine phosphorylase OS=Vibrio cholerae serotype O1 (strain ATCC 39315 / El Tor Inaba N16961) GN=deoA PE=3 SV=2
7.67131	7.68258	7.67128	7.54846	7.60265	7.50546	7.7225	7.63823	7.68511	7.58131	7.59187	7.6183	+	+		+		+	+	5-phosphoribose 1-diphosphate biosynthetic process;5-phosphoribose 1-diphosphate metabolic process;alcohol biosynthetic process;alcohol metabolic process;biosynthetic process;carbohydrate biosynthetic process;carbohydrate metabolic process;catabolic process;cellular biosynthetic process;cellular carbohydrate biosynthetic process;cellular carbohydrate metabolic process;cellular catabolic process;c…	binding;catalytic activity;cation binding;intramolecular transferase activity;intramolecular transferase activity, phosphotransferases;ion binding;isomerase activity;magnesium ion binding;manganese ion binding;metal ion binding;phosphopentomutase activity;transition metal ion binding	cell part;cytoplasm;intracellular part	Pentose phosphate pathway;Purine metabolism	GO:0005975;GO:0005996;GO:0006014;GO:0006015;GO:0006066;GO:0006139;GO:0006753;GO:0006807;GO:0008152;GO:0009056;GO:0009058;GO:0009117;GO:0009166;GO:0009262;GO:0009264;GO:0009987;GO:0016051;GO:0019302;GO:0019321;GO:0019322;GO:0019693;GO:0034637;GO:0034641;GO:0034655;GO:0043094;GO:0044237;GO:0044238;GO:0044248;GO:0044249;GO:0044262;GO:0044270;GO:0044281;GO:0044283;GO:0046165;GO:0046364;GO:0046390;GO:…	GO:0000287;GO:0003824;GO:0005488;GO:0008973;GO:0016853;GO:0016866;GO:0016868;GO:0030145;GO:0043167;GO:0043169;GO:0046872;GO:0046914	GO:0005737;GO:0044424;GO:0044464	ko00030;ko00230	82.002	0	44.152	47325000	35811000	48229332	39576668	2.40382	1.90882	0.122867	0.100275	-0.00689077	2.58825	0.077899	0.676514	-0.0449684	1.59869	-0.129758	1.47043	0.0847898	Q9KPL9	>sp|Q9KPL9|DEOB_VIBCH Phosphopentomutase OS=Vibrio cholerae serotype O1 (strain ATCC 39315 / El Tor Inaba N16961) GN=deoB PE=3 SV=1
8.71569	8.68742	8.77346	8.55531	8.69813	8.76576	8.51768	8.55274	8.65879	8.41251	8.37206	8.48147	+		+	+	+		+	cellular metabolic process;cellular nitrogen compound metabolic process;cellular process;heterocycle metabolic process;metabolic process;nitrogen compound metabolic process;nucleobase-containing compound metabolic process;nucleobase-containing small molecule metabolic process;nucleoside metabolic process;primary metabolic process;purine nucleoside metabolic process;purine-containing compound meta…	catalytic activity;purine-nucleoside phosphorylase activity;transferase activity;transferase activity, transferring glycosyl groups;transferase activity, transferring pentosyl groups		Nicotinate and nicotinamide metabolism;Purine metabolism;Pyrimidine metabolism	GO:0006139;GO:0006807;GO:0008152;GO:0009116;GO:0009987;GO:0034641;GO:0042278;GO:0044237;GO:0044238;GO:0044281;GO:0046483;GO:0055086;GO:0072521	GO:0003824;GO:0004731;GO:0016740;GO:0016757;GO:0016763		ko00230;ko00240;ko00760	245.32	0	26.124	533356672	480443328	380749984	265696672	2.31928	0.321141	0.0524613	1.40652	0.149121	2.7602	0.303511	1.64221	0.25105	0.572274	0.0966593	1.35872	0.154391	Q9KPM0	>sp|Q9KPM0|DEOD1_VIBCH Purine nucleoside phosphorylase DeoD-type 1 OS=Vibrio cholerae serotype O1 (strain ATCC 39315 / El Tor Inaba N16961) GN=deoD1 PE=1 SV=1
7.2442	7.17661	7.25164	7.33873	7.42721	7.34244	7.41712	7.47516	7.47526	7.42506	7.34054	7.35972	+	+	+	+				amine biosynthetic process;amine metabolic process;biosynthetic process;carboxylic acid biosynthetic process;carboxylic acid metabolic process;cellular amine metabolic process;cellular amino acid biosynthetic process;cellular amino acid metabolic process;cellular biosynthetic process;cellular ketone metabolic process;cellular metabolic process;cellular nitrogen compound biosynthetic process;cellu…	catalytic activity;hydrolase activity;hydrolase activity, acting on ester bonds;phosphatase activity;phosphoric ester hydrolase activity;phosphoserine phosphatase activity		Glycine, serine and threonine metabolism;Methane metabolism	GO:0006082;GO:0006520;GO:0006544;GO:0006545;GO:0006563;GO:0006564;GO:0006807;GO:0008152;GO:0008652;GO:0009058;GO:0009069;GO:0009070;GO:0009308;GO:0009309;GO:0009987;GO:0016053;GO:0019752;GO:0034641;GO:0042180;GO:0043436;GO:0044106;GO:0044237;GO:0044238;GO:0044249;GO:0044271;GO:0044281;GO:0044283;GO:0046394	GO:0003824;GO:0004647;GO:0016787;GO:0016788;GO:0016791;GO:0042578		ko00260;ko00680	191.61	0	36.115	16805000	23519334	28622000	23803334	2.94892	1.74764	-0.145312	2.78039	-0.231699	1.90311	-0.150958	0.0502397	-0.00564607	1.16785	-0.0863872	1.1831	0.0807411	Q9KPM2	>sp|Q9KPM2|SERB_VIBCH Phosphoserine phosphatase OS=Vibrio cholerae serotype O1 (strain ATCC 39315 / El Tor Inaba N16961) GN=VC_2345 PE=1 SV=1
8.78518	8.84153	8.8872	8.8134	8.73971	8.84347	8.84966	8.9287	8.83997	9.01427	9.01144	8.92461	+			+	+			catabolic process;cellular catabolic process;cellular metabolic process;cellular nitrogen compound catabolic process;cellular nitrogen compound metabolic process;cellular process;GTP catabolic process;GTP metabolic process;heterocycle catabolic process;heterocycle metabolic process;metabolic process;nitrogen compound metabolic process;nucleobase-containing compound catabolic process;nucleobase-co…	binding;catalytic activity;GTP binding;GTPase activity;guanyl nucleotide binding;guanyl ribonucleotide binding;hydrolase activity;hydrolase activity, acting on acid anhydrides;hydrolase activity, acting on acid anhydrides, in phosphorus-containing anhydrides;nucleic acid binding;nucleoside-triphosphatase activity;nucleotide binding;purine nucleotide binding;purine ribonucleoside triphosphate bind…	cell part;cytoplasm;intracellular part		GO:0006139;GO:0006163;GO:0006184;GO:0006195;GO:0006753;GO:0006807;GO:0008152;GO:0009056;GO:0009117;GO:0009141;GO:0009143;GO:0009144;GO:0009146;GO:0009150;GO:0009154;GO:0009166;GO:0009199;GO:0009203;GO:0009205;GO:0009207;GO:0009259;GO:0009261;GO:0009987;GO:0034641;GO:0034655;GO:0044237;GO:0044238;GO:0044248;GO:0044270;GO:0044281;GO:0046039;GO:0046483;GO:0046700;GO:0055086;GO:0072521;GO:0072523	GO:0000166;GO:0003676;GO:0003723;GO:0003746;GO:0003824;GO:0003924;GO:0005488;GO:0005525;GO:0008135;GO:0016462;GO:0016787;GO:0016817;GO:0016818;GO:0017076;GO:0017111;GO:0019001;GO:0032553;GO:0032555;GO:0032561;GO:0035639	GO:0005737;GO:0044424;GO:0044464		323.31	0	76.481	691769984	632430016	749260032	966913344	1.94452	0.385893	0.0391067	0.355531	-0.034811	1.60037	-0.145473	1.90877	-0.18458	0.820865	-0.0739177	1.27574	-0.110662	Q9KPM5	>sp|Q9KPM5|EFG2_VIBCH Elongation factor G 2 OS=Vibrio cholerae serotype O1 (strain ATCC 39315 / El Tor Inaba N16961) GN=fusA2 PE=3 SV=1
7.22783	7.22295	7.25047	7.22518	7.2132	7.24482	7.36122	7.40605	7.1991	7.54098	7.42464	7.48878	+			+	+				catalytic activity;fatty acid ligase activity;ligase activity;ligase activity, forming carbon-sulfur bonds;long-chain fatty acid-CoA ligase activity				GO:0003824;GO:0004467;GO:0015645;GO:0016874;GO:0016877			155.87	0	63.38	17136334	16901666	21420000	30717666	2.47992	0.183152	0.00601816	0.627121	-0.0883686	2.71314	-0.251046	2.74303	-0.257064	0.674595	-0.0943867	1.0725	-0.162678	Q9KPM6	>tr|Q9KPM6|Q9KPM6_VIBCH Long-chain-fatty-acid--CoA ligase, putative OS=Vibrio cholerae serotype O1 (strain ATCC 39315 / El Tor Inaba N16961) GN=VC_2341 PE=4 SV=1
7.35151	7.49697	7.43965	7.29325	7.34028	7.21733	6.77433	6.88414	NaN	7.05725	7.0404	7.01081	+		+	+	+	+	+	metabolic process	adenyl nucleotide binding;adenyl ribonucleotide binding;ATP binding;binding;catalytic activity;cation binding;ion binding;metal ion binding;nucleotide binding;purine nucleotide binding;purine ribonucleoside triphosphate binding;purine ribonucleotide binding;ribonucleotide binding			GO:0008152	GO:0000166;GO:0003824;GO:0005488;GO:0005524;GO:0017076;GO:0030554;GO:0032553;GO:0032555;GO:0032559;GO:0035639;GO:0043167;GO:0043169;GO:0046872			163.04	0	55.712	27129334	19343666	4535300	10878667	4.31062	1.23489	0.145754	2.50892	0.600139	3.04581	0.393222	2.52924	0.247468	2.28504	0.454385	1.7264	-0.206917	Q9KPN3	>tr|Q9KPN3|Q9KPN3_VIBCH Ribosomal protein S6 modification protein-related protein OS=Vibrio cholerae serotype O1 (strain ATCC 39315 / El Tor Inaba N16961) GN=VC_2333 PE=4 SV=1
8.41835	8.34054	8.38664	8.47331	8.51378	8.54496	8.41915	8.46688	8.4378	8.3078	8.27575	8.3425	+	+			+	+	+	amine biosynthetic process;amine metabolic process;aspartate family amino acid biosynthetic process;aspartate family amino acid metabolic process;biosynthetic process;carboxylic acid biosynthetic process;carboxylic acid metabolic process;cellular amine metabolic process;cellular amino acid biosynthetic process;cellular amino acid metabolic process;cellular biosynthetic process;cellular ketone met…	2,3,4,5-tetrahydropyridine-2,6-dicarboxylate N-succinyltransferase activity;binding;catalytic activity;cation binding;ion binding;magnesium ion binding;metal ion binding;N-acyltransferase activity;N-succinyltransferase activity;succinyltransferase activity;transferase activity;transferase activity, transferring acyl groups;transferase activity, transferring acyl groups other than amino-acyl groups	cell part;cytoplasm;intracellular part	Lysine biosynthesis	GO:0006082;GO:0006520;GO:0006553;GO:0006807;GO:0008152;GO:0008652;GO:0009058;GO:0009066;GO:0009067;GO:0009085;GO:0009089;GO:0009308;GO:0009309;GO:0009987;GO:0016053;GO:0019752;GO:0019877;GO:0034641;GO:0042180;GO:0043436;GO:0043648;GO:0044106;GO:0044237;GO:0044238;GO:0044249;GO:0044271;GO:0044281;GO:0044283;GO:0046394;GO:0046451	GO:0000287;GO:0003824;GO:0005488;GO:0008666;GO:0016410;GO:0016740;GO:0016746;GO:0016747;GO:0016748;GO:0016749;GO:0043167;GO:0043169;GO:0046872	GO:0005737;GO:0044424;GO:0044464	ko00300	295.28	0	35.647	241553328	324840000	276516672	203956672	3.32092	1.86383	-0.128838	1.05302	-0.0594304	1.15861	0.073163	2.69007	0.202001	1.30282	0.0694075	2.29637	0.132593	Q9KPN7	>sp|Q9KPN7|DAPD_VIBCH 2,3,4,5-tetrahydropyridine-2,6-dicarboxylate N-succinyltransferase OS=Vibrio cholerae serotype O1 (strain ATCC 39315 / El Tor Inaba N16961) GN=dapD PE=3 SV=1
7.19978	7.34988	7.24477	7.17234	7.12564	7.17152	7.31846	7.36526	7.4283	7.34163	7.37394	7.29376	+				+	+										72.382	0	11.128	18597334	14356333	23605666	21761334	2.28785	1.08165	0.108309	0.903185	-0.105862	0.644404	-0.0716335	2.5243	-0.179943	2.42563	-0.214172	0.362129	0.0342288	Q9KPP0	>tr|Q9KPP0|Q9KPP0_VIBCH Uncharacterized protein OS=Vibrio cholerae serotype O1 (strain ATCC 39315 / El Tor Inaba N16961) GN=VC_2326 PE=4 SV=1
NaN	6.53382	6.4416	6.57102	NaN	6.43919	6.70016	6.62515	6.50533	6.8382	6.77434	6.73009	+			+	+			cellular macromolecule metabolic process;cellular metabolic process;cellular nitrogen compound metabolic process;cellular process;cellular response to stimulus;cellular response to stress;DNA metabolic process;DNA recombination;DNA repair;macromolecule metabolic process;metabolic process;nitrogen compound metabolic process;nucleic acid metabolic process;nucleobase-containing compound metabolic pr…	adenyl nucleotide binding;adenyl ribonucleotide binding;ATP binding;ATPase activity;ATPase activity, coupled;ATP-dependent DNA helicase activity;ATP-dependent helicase activity;binding;catalytic activity;deoxyribonuclease activity;DNA binding;DNA helicase activity;DNA-dependent ATPase activity;exodeoxyribonuclease activity;exodeoxyribonuclease activity, producing 5'-phosphomonoesters;exodeoxyribo…	cell part;exodeoxyribonuclease V complex;intracellular part;macromolecular complex;protein complex	Homologous recombination	GO:0006139;GO:0006259;GO:0006281;GO:0006310;GO:0006807;GO:0006950;GO:0006974;GO:0008152;GO:0009987;GO:0033554;GO:0034641;GO:0043170;GO:0044237;GO:0044238;GO:0044260;GO:0050896;GO:0051716;GO:0090304	GO:0000166;GO:0003676;GO:0003677;GO:0003678;GO:0003824;GO:0004003;GO:0004386;GO:0004518;GO:0004527;GO:0004529;GO:0004536;GO:0005488;GO:0005524;GO:0008026;GO:0008094;GO:0008854;GO:0016462;GO:0016787;GO:0016788;GO:0016796;GO:0016817;GO:0016818;GO:0016887;GO:0016895;GO:0017076;GO:0017111;GO:0030554;GO:0032553;GO:0032555;GO:0032559;GO:0035639;GO:0042623;GO:0070035	GO:0009338;GO:0032991;GO:0043234;GO:0044424;GO:0044464	ko03440	23.238	0	135.86	2.06093e+06	2.15773e+06	4.14447e+06	6.06957e+06	1.69976	0.0711639	-0.0173941	0.643506	-0.122499	1.93103	-0.293164	1.64385	-0.27577	0.496122	-0.105105	1.2362	-0.170666	Q9KPP6	>tr|Q9KPP6|Q9KPP6_VIBCH RecBCD enzyme subunit RecB OS=Vibrio cholerae serotype O1 (strain ATCC 39315 / El Tor Inaba N16961) GN=recB PE=3 SV=1
7.29141	7.30565	7.1858	7.22557	7.24388	7.2501	7.40005	7.40628	7.35818	7.59203	7.52386	7.61561	+		+	+	+	+	+	establishment of localization;nucleobase-containing compound transport;nucleoside transport;transport	nucleobase-containing compound transmembrane transporter activity;nucleoside transmembrane transporter activity;substrate-specific transmembrane transporter activity;substrate-specific transporter activity;transmembrane transporter activity;transporter activity	cell outer membrane;cell part;external encapsulating structure part;membrane;outer membrane		GO:0006810;GO:0015858;GO:0015931;GO:0051234	GO:0005215;GO:0005337;GO:0015932;GO:0022857;GO:0022891;GO:0022892	GO:0009279;GO:0016020;GO:0019867;GO:0044462;GO:0044464		125.19	0	33.42	18371666	17377000	24473334	37921332	4.39201	0.212637	0.0211037	1.45161	-0.12722	2.60335	-0.316216	3.53638	-0.337319	3.04145	-0.148323	2.41682	-0.188996	Q9KPR1	>tr|Q9KPR1|Q9KPR1_VIBCH Outer membrane protein OmpK OS=Vibrio cholerae serotype O1 (strain ATCC 39315 / El Tor Inaba N16961) GN=VC_2305 PE=4 SV=1
7.8201	7.86224	7.84484	7.9138	7.80619	7.78837	7.90671	7.92968	7.98904	8.05998	8.14836	8.02156	+		+	+	+		+									175.16	0	22.459	69620664	69142664	87743336	120206664	2.79233	0.0526104	0.00627343	1.65345	-0.0994171	2.39313	-0.234237	1.94318	-0.240511	1.07481	-0.10569	1.4014	-0.13482	Q9KPR8	>tr|Q9KPR8|Q9KPR8_VIBCH Lipoprotein, putative OS=Vibrio cholerae serotype O1 (strain ATCC 39315 / El Tor Inaba N16961) GN=VC_2298 PE=4 SV=1
7.50659	7.50673	7.58835	7.40589	7.3868	7.52034	7.55837	7.56114	7.3836	7.96732	7.85166	7.85742	+			+	+		+	cation transport;establishment of localization;ion transport;metal ion transport;monovalent inorganic cation transport;sodium ion transport;transport	catalytic activity;NADH dehydrogenase (quinone) activity;NADH dehydrogenase (ubiquinone) activity;NADH dehydrogenase activity;oxidoreductase activity;oxidoreductase activity, acting on NADH or NADPH;oxidoreductase activity, acting on NADH or NADPH, quinone or similar compound as acceptor			GO:0006810;GO:0006811;GO:0006812;GO:0006814;GO:0015672;GO:0030001;GO:0051234	GO:0003824;GO:0003954;GO:0008137;GO:0016491;GO:0016651;GO:0016655;GO:0050136			228.84	0	48.623	34326668	27656000	32254334	78610664	3.54732	0.901247	0.0962124	0.194858	0.0328539	2.8178	-0.358244	2.89688	-0.454456	0.367856	-0.0633585	2.30379	-0.391098	Q9KPS1	>sp|Q9KPS1|NQRA_VIBCH Na(+)-translocating NADH-quinone reductase subunit A OS=Vibrio cholerae serotype O1 (strain ATCC 39315 / El Tor Inaba N16961) GN=nqrA PE=1 SV=2
6.70068	NaN	6.82303	NaN	6.58156	6.3684	6.81733	6.7322	NaN	7.1495	7.03957	7.04202	+			+	+		+	cation transport;cellular metabolic process;cellular process;electron transport chain;establishment of localization;generation of precursor metabolites and energy;ion transport;metabolic process;metal ion transport;monovalent inorganic cation transport;oxidation-reduction process;respiratory electron transport chain;sodium ion transport;transport	binding;catalytic activity;coenzyme binding;cofactor binding;FMN binding;NADH dehydrogenase (quinone) activity;NADH dehydrogenase (ubiquinone) activity;NADH dehydrogenase activity;nucleotide binding;oxidoreductase activity;oxidoreductase activity, acting on NADH or NADPH;oxidoreductase activity, acting on NADH or NADPH, quinone or similar compound as acceptor	cell part;cell wall;external encapsulating structure;Gram-negative-bacterium-type cell wall;integral to membrane;intrinsic to membrane;membrane;membrane part;peptidoglycan-based cell wall;plasma membrane		GO:0006091;GO:0006810;GO:0006811;GO:0006812;GO:0006814;GO:0008152;GO:0009987;GO:0015672;GO:0022900;GO:0022904;GO:0030001;GO:0044237;GO:0051234;GO:0055114	GO:0000166;GO:0003824;GO:0003954;GO:0005488;GO:0008137;GO:0010181;GO:0016491;GO:0016651;GO:0016655;GO:0048037;GO:0050136;GO:0050662	GO:0005618;GO:0005886;GO:0009274;GO:0009276;GO:0016020;GO:0016021;GO:0030312;GO:0031224;GO:0044425;GO:0044464		9.038	0	45.357	3.89097e+06	2050400	3988000	12026333	2.37315	0.839494	0.286873	0.056298	-0.0129099	1.77026	-0.315177	2.13681	-0.60205	0.918608	-0.299783	1.89308	-0.302267	Q9KPS2	>sp|Q9KPS2|NQRB_VIBCH Na(+)-translocating NADH-quinone reductase subunit B OS=Vibrio cholerae serotype O1 (strain ATCC 39315 / El Tor Inaba N16961) GN=nqrB PE=1 SV=2
7.36457	7.50617	7.35872	7.22531	7.39005	7.29868	7.5203	7.51248	7.48416	7.4866	7.48229	7.54311	+				+	+										127.45	0	29.196	26022334	20414000	32057000	31981334	1.92466	0.708155	0.105137	0.904439	-0.0958301	0.839984	-0.0941827	1.74435	-0.19932	1.83165	-0.200967	0.0245444	0.00164747	Q9KPS6	>tr|Q9KPS6|Q9KPS6_VIBCH Uncharacterized protein OS=Vibrio cholerae serotype O1 (strain ATCC 39315 / El Tor Inaba N16961) GN=VC_2286 PE=4 SV=1
8.79517	8.85879	8.82437	8.75963	8.76876	8.79495	8.68248	8.71045	8.76481	8.65545	8.58819	8.62823	+		+	+	+		+	macromolecule metabolic process;metabolic process;primary metabolic process;protein metabolic process;proteolysis	catalytic activity;hydrolase activity;peptidase activity		Arginine and proline metabolism;beta-Alanine metabolism;Glutathione metabolism;Histidine metabolism	GO:0006508;GO:0008152;GO:0019538;GO:0043170;GO:0044238	GO:0003824;GO:0008233;GO:0016787		ko00330;ko00340;ko00410;ko00480	323.31	0	58.704	671259968	595263360	525536672	421530016	3.43125	1.14516	0.0516615	1.6113	0.106866	2.77986	0.202156	2.60588	0.150495	0.98052	0.0552041	1.42685	0.0952908	Q9KPT3	>tr|Q9KPT3|Q9KPT3_VIBCH Aminoacyl-histidine dipeptidase OS=Vibrio cholerae serotype O1 (strain ATCC 39315 / El Tor Inaba N16961) GN=VC_2279 PE=4 SV=1
7.95689	7.91593	7.93277	7.86679	7.83875	7.87688	7.75962	7.72097	7.66176	7.74654	7.71828	7.72599	+	+	+	+	+	+		amine biosynthetic process;amine metabolic process;biosynthetic process;carboxylic acid biosynthetic process;carboxylic acid metabolic process;cellular amine metabolic process;cellular amino acid biosynthetic process;cellular amino acid metabolic process;cellular biosynthetic process;cellular ketone metabolic process;cellular metabolic process;cellular nitrogen compound biosynthetic process;cellu…	binding;catalytic activity;coenzyme binding;cofactor binding;glutamate-5-semialdehyde dehydrogenase activity;NADP binding;nucleotide binding;oxidoreductase activity;oxidoreductase activity, acting on the aldehyde or oxo group of donors;oxidoreductase activity, acting on the aldehyde or oxo group of donors, NAD or NADP as acceptor	cell part;cytoplasm;intracellular part	Arginine and proline metabolism	GO:0006082;GO:0006520;GO:0006560;GO:0006561;GO:0006807;GO:0008152;GO:0008652;GO:0009058;GO:0009064;GO:0009084;GO:0009308;GO:0009309;GO:0009987;GO:0016053;GO:0018130;GO:0019752;GO:0034641;GO:0042180;GO:0043436;GO:0044106;GO:0044237;GO:0044238;GO:0044249;GO:0044271;GO:0044281;GO:0044283;GO:0046394;GO:0046483;GO:0055129	GO:0000166;GO:0003824;GO:0004350;GO:0005488;GO:0016491;GO:0016620;GO:0016903;GO:0048037;GO:0050661;GO:0050662	GO:0005737;GO:0044424;GO:0044464	ko00330	254.97	0	44.503	86202664	72628336	51995332	53757000	4.4003	1.97088	0.0743861	2.69785	0.221079	3.82828	0.204924	3.11095	0.130538	2.05822	0.146693	0.210993	-0.0161546	Q9KPT9	>sp|Q9KPT9|PROA_VIBCH Gamma-glutamyl phosphate reductase OS=Vibrio cholerae serotype O1 (strain ATCC 39315 / El Tor Inaba N16961) GN=proA PE=3 SV=2
8.31662	8.31307	8.36624	8.25513	8.185	8.25931	8.16289	8.2017	8.18084	8.16017	8.13386	8.17577	+	+	+	+	+			biosynthetic process;cellular biosynthetic process;cellular metabolic process;cellular nitrogen compound biosynthetic process;cellular nitrogen compound metabolic process;cellular process;flavin-containing compound biosynthetic process;flavin-containing compound metabolic process;heterocycle biosynthetic process;heterocycle metabolic process;metabolic process;nitrogen compound metabolic process;r…	3,4-dihydroxy-2-butanone-4-phosphate synthase activity;binding;carbon-carbon lyase activity;catalytic activity;cation binding;cyclohydrolase activity;GTP cyclohydrolase activity;GTP cyclohydrolase II activity;hydrolase activity;hydrolase activity, acting on carbon-nitrogen (but not peptide) bonds;hydrolase activity, acting on carbon-nitrogen (but not peptide) bonds, in cyclic amidines;ion binding…		Riboflavin metabolism	GO:0006766;GO:0006767;GO:0006771;GO:0006807;GO:0008152;GO:0009058;GO:0009110;GO:0009231;GO:0009987;GO:0018130;GO:0034641;GO:0042364;GO:0042726;GO:0042727;GO:0044237;GO:0044249;GO:0044271;GO:0044281;GO:0044283;GO:0046483	GO:0003824;GO:0003933;GO:0003935;GO:0005488;GO:0008686;GO:0016787;GO:0016810;GO:0016814;GO:0016829;GO:0016830;GO:0019238;GO:0043167;GO:0043169;GO:0046872		ko00740	241.28	0	40.41	215110000	171576672	152090000	143530000	3.41594	1.54015	0.0988277	2.73323	0.150163	2.94341	0.175374	1.32569	0.0765464	0.900864	0.051335	0.691921	0.0252113	Q9KPU3	>tr|Q9KPU3|Q9KPU3_VIBCH 3,4-dihydroxy-2-butanone 4-phosphate synthase OS=Vibrio cholerae serotype O1 (strain ATCC 39315 / El Tor Inaba N16961) GN=ribB PE=3 SV=1
8.4132	8.31712	8.34974	8.33025	8.2275	8.34084	8.52519	8.56962	8.65815	8.47937	8.49933	8.45702	+		+	+	+	+		biosynthetic process;cellular biosynthetic process;cellular metabolic process;cellular nitrogen compound biosynthetic process;cellular nitrogen compound metabolic process;cellular process;flavin-containing compound biosynthetic process;flavin-containing compound metabolic process;heterocycle biosynthetic process;heterocycle metabolic process;metabolic process;nitrogen compound metabolic process;r…	6,7-dimethyl-8-ribityllumazine synthase activity;catalytic activity;intramolecular transferase activity;intramolecular transferase activity, transferring acyl groups;isomerase activity;transferase activity	cell part;macromolecular complex;protein complex;riboflavin synthase complex	Riboflavin metabolism	GO:0006766;GO:0006767;GO:0006771;GO:0006807;GO:0008152;GO:0009058;GO:0009110;GO:0009231;GO:0009987;GO:0018130;GO:0034641;GO:0042364;GO:0042726;GO:0042727;GO:0044237;GO:0044249;GO:0044271;GO:0044281;GO:0044283;GO:0046483	GO:0000906;GO:0003824;GO:0016740;GO:0016853;GO:0016866;GO:0016867	GO:0009349;GO:0032991;GO:0043234;GO:0044464	ko00740	226.69	0	16.433	230076672	200656672	387156672	301243328	3.10222	0.589226	0.0604909	2.01616	-0.224298	1.73991	-0.118552	2.02873	-0.179043	2.23015	-0.284789	1.21347	0.105746	Q9KPU4	>sp|Q9KPU4|RISB_VIBCH 6,7-dimethyl-8-ribityllumazine synthase OS=Vibrio cholerae serotype O1 (strain ATCC 39315 / El Tor Inaba N16961) GN=ribH PE=3 SV=2
7.25686	7.32271	7.38059	7.51557	7.4354	7.39639	7.5266	7.59074	7.56953	7.44353	7.42302	7.36061	+		+			+	+	biological regulation;biosynthetic process;cellular biosynthetic process;cellular macromolecule metabolic process;cellular metabolic process;cellular nitrogen compound metabolic process;cellular process;macromolecule metabolic process;metabolic process;nitrogen compound metabolic process;nucleic acid metabolic process;nucleobase-containing compound metabolic process;primary metabolic process;regu…	binding;nucleic acid binding;RNA binding			GO:0006139;GO:0006353;GO:0006355;GO:0006807;GO:0008152;GO:0009058;GO:0009889;GO:0009987;GO:0010468;GO:0010556;GO:0016070;GO:0019219;GO:0019222;GO:0031323;GO:0031326;GO:0032774;GO:0034641;GO:0043170;GO:0044237;GO:0044238;GO:0044249;GO:0044260;GO:0050789;GO:0050794;GO:0051171;GO:0051252;GO:0060255;GO:0065007;GO:0080090;GO:0090304;GO:2000112	GO:0003676;GO:0003723;GO:0005488			160.61	0	17.675	21037000	28313334	36568000	25731334	2.55574	1.211	-0.129064	2.40914	-0.242232	0.955965	-0.0889966	0.392996	0.040067	1.32961	-0.113169	2.09478	0.153236	Q9KPU5	>sp|Q9KPU5|NUSB_VIBCH Transcription antitermination protein NusB OS=Vibrio cholerae serotype O1 (strain ATCC 39315 / El Tor Inaba N16961) GN=nusB PE=3 SV=1
8.58785	8.50556	8.6119	8.48477	8.69527	8.81114	8.89278	8.86053	8.79754	8.73217	8.70679	8.70355	+		+	+			+	biosynthetic process;cellular biosynthetic process;cellular macromolecule biosynthetic process;cellular macromolecule metabolic process;cellular metabolic process;cellular process;cellular protein metabolic process;macromolecule biosynthetic process;macromolecule metabolic process;metabolic process;primary metabolic process;protein metabolic process;translation	structural constituent of ribosome;structural molecule activity	cell part;intracellular organelle part;intracellular part;macromolecular complex;organelle part;ribonucleoprotein complex;small ribosomal subunit	Ribosome	GO:0006412;GO:0008152;GO:0009058;GO:0009059;GO:0009987;GO:0019538;GO:0034645;GO:0043170;GO:0044237;GO:0044238;GO:0044249;GO:0044260;GO:0044267	GO:0003735;GO:0005198	GO:0015935;GO:0030529;GO:0032991;GO:0044422;GO:0044424;GO:0044446;GO:0044464	ko03010	323.31	0	26.808	372196672	482813344	711320000	518036672	1.5162	0.400079	-0.0952911	2.56591	-0.28185	1.91774	-0.145735	0.202813	-0.050444	0.872371	-0.186559	2.00872	0.136115	Q9KPV2	>sp|Q9KPV2|RS2_VIBCH 30S ribosomal protein S2 OS=Vibrio cholerae serotype O1 (strain ATCC 39315 / El Tor Inaba N16961) GN=rpsB PE=3 SV=1
9.08171	9.1811	9.22108	8.9574	9.03129	8.96859	8.95015	9.02547	9.10401	8.9204	8.96638	8.9395	+	+		+					binding;nucleic acid binding;RNA binding;translation elongation factor activity;translation factor activity, nucleic acid binding	cell part;cytoplasm;intracellular part			GO:0003676;GO:0003723;GO:0003746;GO:0005488;GO:0008135	GO:0005737;GO:0044424;GO:0044464		323.31	0	29.847	1462700032	970496704	1074186624	876000000	2.092	1.68289	0.175536	1.04204	0.134751	2.13653	0.219201	0.755029	0.0436649	0.336681	-0.0407848	0.845506	0.0844498	Q9KPV3	>sp|Q9KPV3|EFTS_VIBCH Elongation factor Ts OS=Vibrio cholerae serotype O1 (strain ATCC 39315 / El Tor Inaba N16961) GN=tsf PE=3 SV=1
8.56547	8.511	8.51582	8.34992	8.48649	8.51234	8.24455	8.21961	8.28205	8.12727	8.16593	8.15622	+		+	+	+	+	+	amine biosynthetic process;amine metabolic process;biosynthetic process;carboxylic acid biosynthetic process;carboxylic acid metabolic process;cellular amine metabolic process;cellular amino acid biosynthetic process;cellular amino acid metabolic process;cellular biosynthetic process;cellular ketone metabolic process;cellular metabolic process;cellular nitrogen compound biosynthetic process;cellu…	adenyl nucleotide binding;adenyl ribonucleotide binding;ATP binding;binding;catalytic activity;kinase activity;nucleobase-containing compound kinase activity;nucleotide binding;nucleotide kinase activity;phosphotransferase activity, phosphate group as acceptor;purine nucleotide binding;purine ribonucleoside triphosphate binding;purine ribonucleotide binding;ribonucleotide binding;transferase acti…	cell part;cytoplasm;intracellular part	Pyrimidine metabolism	GO:0006082;GO:0006139;GO:0006213;GO:0006220;GO:0006221;GO:0006241;GO:0006520;GO:0006753;GO:0006807;GO:0008152;GO:0008652;GO:0009058;GO:0009116;GO:0009117;GO:0009119;GO:0009141;GO:0009142;GO:0009147;GO:0009148;GO:0009165;GO:0009199;GO:0009201;GO:0009208;GO:0009209;GO:0009218;GO:0009220;GO:0009259;GO:0009260;GO:0009308;GO:0009309;GO:0009987;GO:0016053;GO:0018130;GO:0019752;GO:0034641;GO:0034654;GO:…	GO:0000166;GO:0003824;GO:0005488;GO:0005524;GO:0009041;GO:0016301;GO:0016740;GO:0016772;GO:0016776;GO:0017076;GO:0019201;GO:0019205;GO:0030554;GO:0032553;GO:0032555;GO:0032559;GO:0033862;GO:0035639	GO:0005737;GO:0044424;GO:0044464	ko00240	323.31	0	26.196	339993344	285236672	177623328	141290000	4.3294	0.693658	0.0811825	3.44371	0.282025	4.27131	0.38096	2.35641	0.299778	1.70019	0.200843	1.9961	0.0989351	Q9KPV4	>sp|Q9KPV4|PYRH_VIBCH Uridylate kinase OS=Vibrio cholerae serotype O1 (strain ATCC 39315 / El Tor Inaba N16961) GN=pyrH PE=3 SV=1
7.81484	7.81186	7.77739	7.85164	7.90618	7.81757	7.8917	7.91133	7.84428	8.18096	8.16687	8.12021	+		+	+	+		+	cellular component assembly;cellular component assembly at cellular level;cellular component organization;cellular component organization at cellular level;cellular component organization or biogenesis;cellular component organization or biogenesis at cellular level;cellular localization;cellular macromolecule localization;cellular membrane organization;cellular process;cellular protein localizati…		cell outer membrane;cell part;external encapsulating structure part;integral to membrane;intrinsic to membrane;membrane;membrane part;outer membrane;plasma membrane		GO:0008104;GO:0009987;GO:0016043;GO:0016044;GO:0022607;GO:0033036;GO:0034613;GO:0043165;GO:0051179;GO:0051205;GO:0051641;GO:0051668;GO:0061024;GO:0070727;GO:0071709;GO:0071840;GO:0071841;GO:0071842;GO:0071844		GO:0005886;GO:0009279;GO:0016020;GO:0016021;GO:0019867;GO:0031224;GO:0044425;GO:0044462;GO:0044464		323.31	0	89.929	63342000	72445000	76443664	143476672	5.2256	0.938021	-0.0571024	1.59881	-0.0810766	4.06707	-0.354652	3.14561	-0.29755	0.298631	-0.0239743	3.26762	-0.273575	Q9KPW0	>tr|Q9KPW0|Q9KPW0_VIBCH Outer membrane protein assembly factor BamA OS=Vibrio cholerae serotype O1 (strain ATCC 39315 / El Tor Inaba N16961) GN=bamA PE=3 SV=1
8.57485	8.64241	8.6427	8.62575	8.54423	8.57197	8.56721	8.58623	8.59851	8.67065	8.7687	8.70159	+				+		+			cell outer membrane;cell part;external encapsulating structure part;membrane;outer membrane;periplasmic space				GO:0009279;GO:0016020;GO:0019867;GO:0042597;GO:0044462;GO:0044464		227.14	0	18.952	417963328	381926656	383860000	519513344	2.01433	0.5261	0.0393372	0.671466	0.0360041	1.19953	-0.0936588	1.62016	-0.132996	0.044452	-0.00333309	1.88911	-0.129663	Q9KPW1	>sp|Q9KPW1|SKP_VIBCH Chaperone protein Skp OS=Vibrio cholerae serotype O1 (strain ATCC 39315 / El Tor Inaba N16961) GN=skp PE=3 SV=1
7.5528	7.49984	7.48958	7.42385	7.41577	7.45026	7.39278	7.31325	7.18458	7.36907	7.40176	7.34225	+	+	+	+	+			biosynthetic process;cellular biosynthetic process;cellular lipid metabolic process;cellular metabolic process;cellular process;glycolipid biosynthetic process;glycolipid metabolic process;lipid A biosynthetic process;lipid A metabolic process;lipid biosynthetic process;lipid metabolic process;membrane lipid biosynthetic process;membrane lipid metabolic process;metabolic process;organophosphate m…	catalytic activity;transferase activity;transferase activity, transferring acyl groups;transferase activity, transferring acyl groups other than amino-acyl groups		Lipopolysaccharide biosynthesis	GO:0006629;GO:0006643;GO:0006644;GO:0006664;GO:0008152;GO:0008610;GO:0008654;GO:0009058;GO:0009245;GO:0009247;GO:0009987;GO:0019637;GO:0044237;GO:0044238;GO:0044249;GO:0044255;GO:0046467;GO:0046493	GO:0003824;GO:0016740;GO:0016746;GO:0016747		ko00540	38.585	0	37.01	32731666	26928666	20190666	23534666	1.99571	1.71555	0.0841095	1.56714	0.2172	2.26944	0.143048	1.36844	0.0589387	1.0149	0.133091	0.515983	-0.0741522	Q9KPW2	>sp|Q9KPW2|LPXD_VIBCH UDP-3-O-acylglucosamine N-acyltransferase OS=Vibrio cholerae serotype O1 (strain ATCC 39315 / El Tor Inaba N16961) GN=lpxD PE=3 SV=1
7.76853	7.81597	7.77208	7.70748	7.75342	7.72502	7.9111	7.89806	7.83532	7.83737	7.81719	7.83119	+	+	+		+	+		biosynthetic process;cellular biosynthetic process;cellular lipid metabolic process;cellular metabolic process;cellular process;glycolipid biosynthetic process;glycolipid metabolic process;lipid A biosynthetic process;lipid A metabolic process;lipid biosynthetic process;lipid metabolic process;membrane lipid biosynthetic process;membrane lipid metabolic process;metabolic process;organophosphate m…	acyl-[acyl-carrier-protein]-UDP-N-acetylglucosamine O-acyltransferase activity;catalytic activity;O-acyltransferase activity;transferase activity;transferase activity, transferring acyl groups;transferase activity, transferring acyl groups other than amino-acyl groups	cell part;cytoplasm;intracellular part	Lipopolysaccharide biosynthesis	GO:0006629;GO:0006643;GO:0006644;GO:0006664;GO:0008152;GO:0008610;GO:0008654;GO:0009058;GO:0009245;GO:0009247;GO:0009987;GO:0019637;GO:0044237;GO:0044238;GO:0044249;GO:0044255;GO:0046467;GO:0046493	GO:0003824;GO:0008374;GO:0008780;GO:0016740;GO:0016746;GO:0016747	GO:0005737;GO:0044424;GO:0044464	ko00540	215.51	0	28.494	61104000	53586332	76336336	67401000	3.09662	1.31279	0.0568879	1.57862	-0.0959641	1.23439	-0.0430565	2.61648	-0.0999444	2.3216	-0.152852	1.02898	0.0529076	Q9KPW4	>sp|Q9KPW4|LPXA_VIBCH Acyl-[acyl-carrier-protein]--UDP-N-acetylglucosamine O-acyltransferase OS=Vibrio cholerae serotype O1 (strain ATCC 39315 / El Tor Inaba N16961) GN=lpxA PE=3 SV=1
8.41064	8.3881	8.38698	8.25171	8.30244	8.09896	8.5876	8.4845	8.29195	8.45159	8.52441	8.48585	+	+		+	+				carbon-carbon lyase activity;carboxy-lyase activity;catalytic activity;lyase activity				GO:0003824;GO:0016829;GO:0016830;GO:0016831			56.809	0	19.932	248530000	168256672	295966656	307823328	1.49738	1.34686	0.17754	0.274159	-0.0594397	1.83124	-0.0920404	1.85242	-0.26958	1.04988	-0.236979	0.134814	-0.0326007	Q9KPX2	>sp|Q9KPX2|PADC_VIBCH Probable phenolic acid decarboxylase OS=Vibrio cholerae serotype O1 (strain ATCC 39315 / El Tor Inaba N16961) GN=padC PE=3 SV=1
7.92366	7.96812	7.90595	7.89174	8.04767	7.9335	7.65538	7.72457	7.89174	7.70137	7.72993	7.64478	+			+	+			amine biosynthetic process;amine metabolic process;biosynthetic process;carboxylic acid biosynthetic process;carboxylic acid metabolic process;cellular amine metabolic process;cellular amino acid biosynthetic process;cellular amino acid metabolic process;cellular biosynthetic process;cellular ketone metabolic process;cellular metabolic process;cellular modified amino acid biosynthetic process;cel…	binding;catalytic activity;cation binding;hydrolase activity;hydrolase activity, acting on ester bonds;hydroxyacylglutathione hydrolase activity;ion binding;metal ion binding;thiolester hydrolase activity;transition metal ion binding;zinc ion binding		Pyruvate metabolism	GO:0006082;GO:0006518;GO:0006520;GO:0006575;GO:0006749;GO:0006750;GO:0006790;GO:0006807;GO:0008152;GO:0008652;GO:0009058;GO:0009308;GO:0009309;GO:0009987;GO:0016053;GO:0019752;GO:0034641;GO:0042180;GO:0042398;GO:0043043;GO:0043436;GO:0044106;GO:0044237;GO:0044238;GO:0044249;GO:0044271;GO:0044272;GO:0044281;GO:0044283;GO:0046394	GO:0003824;GO:0004416;GO:0005488;GO:0008270;GO:0016787;GO:0016788;GO:0016790;GO:0043167;GO:0043169;GO:0046872;GO:0046914		ko00620	61.129	0	28.297	85777336	91779336	58732332	49369000	2.13424	0.191451	-0.0250552	1.13659	0.175349	2.82184	0.240549	2.13208	0.265605	1.11896	0.200404	0.365719	0.0652003	Q9KPX6	>sp|Q9KPX6|GLO2_VIBCH Hydroxyacylglutathione hydrolase OS=Vibrio cholerae serotype O1 (strain ATCC 39315 / El Tor Inaba N16961) GN=gloB PE=3 SV=1
8.49307	8.57697	8.52573	8.32465	8.53978	8.43943	8.32484	8.30149	8.33931	8.25142	8.26368	8.26621	+		+	+	+		+	alcohol biosynthetic process;alcohol metabolic process;biosynthetic process;carbohydrate biosynthetic process;carbohydrate metabolic process;cellular biosynthetic process;cellular carbohydrate biosynthetic process;cellular carbohydrate metabolic process;cellular metabolic process;cellular process;D-glycero-D-manno-heptose 7-phosphate biosynthetic process;lipopolysaccharide core region biosyntheti…	binding;carbohydrate binding;catalytic activity;cation binding;D-sedoheptulose 7-phosphate isomerase activity;intramolecular transferase activity;intramolecular transferase activity, phosphotransferases;ion binding;isomerase activity;metal ion binding;transition metal ion binding;zinc ion binding	cell part;cytoplasm;intracellular part	Lipopolysaccharide biosynthesis	GO:0005975;GO:0005996;GO:0006066;GO:0006807;GO:0008152;GO:0009058;GO:0009244;GO:0009311;GO:0009312;GO:0009987;GO:0016051;GO:0019637;GO:0034637;GO:0044237;GO:0044238;GO:0044249;GO:0044262;GO:0044281;GO:0044283;GO:0046165;GO:0046364;GO:0046401;GO:0090407;GO:2001057;GO:2001061	GO:0003824;GO:0005488;GO:0008270;GO:0008968;GO:0016853;GO:0016866;GO:0016868;GO:0030246;GO:0043167;GO:0043169;GO:0046872;GO:0046914	GO:0005737;GO:0044424;GO:0044464	ko00540	200.5	0	20.646	341433344	277600000	209970000	182173328	2.67438	0.65999	0.097305	2.84489	0.210046	3.39993	0.271488	1.30934	0.174183	0.827965	0.112741	2.17133	0.0614421	Q9KPY2	>sp|Q9KPY2|GMHA_VIBCH Phosphoheptose isomerase OS=Vibrio cholerae serotype O1 (strain ATCC 39315 / El Tor Inaba N16961) GN=gmhA PE=1 SV=1
7.20604	7.26996	7.13887	7.22647	7.26564	7.23305	7.07598	7.02498	6.91807	7.0167	6.86174	7.0491	+		+	+	+	+		metabolic process				GO:0008152				34.23	0	31.824	16152667	17460666	10261567	9620833	2.40368	0.390166	-0.0367637	1.52852	0.198613	1.5302	0.229108	1.96602	0.265872	2.09314	0.235377	0.153543	0.030495	Q9KPY3	>tr|Q9KPY3|Q9KPY3_VIBCH Uncharacterized protein OS=Vibrio cholerae serotype O1 (strain ATCC 39315 / El Tor Inaba N16961) GN=VC_2229 PE=4 SV=1
7.11354	7.13114	7.12054	7.07379	7.21466	7.16137	7.31351	7.32381	7.3352	7.30544	7.32801	7.24524	+		+	+	+	+		biosynthetic process;cellular biosynthetic process;cellular metabolic process;cellular nitrogen compound biosynthetic process;cellular nitrogen compound metabolic process;cellular process;'de novo' IMP biosynthetic process;heterocycle biosynthetic process;heterocycle metabolic process;IMP biosynthetic process;IMP metabolic process;metabolic process;methylation;nitrogen compound metabolic process;…	catalytic activity;hydroxymethyl-, formyl- and related transferase activity;methyltransferase activity;phosphoribosylglycinamide formyltransferase activity;transferase activity;transferase activity, transferring one-carbon groups		One carbon pool by folate;Purine metabolism	GO:0006139;GO:0006163;GO:0006164;GO:0006188;GO:0006189;GO:0006730;GO:0006753;GO:0006807;GO:0008152;GO:0009058;GO:0009117;GO:0009123;GO:0009124;GO:0009126;GO:0009127;GO:0009150;GO:0009152;GO:0009156;GO:0009161;GO:0009165;GO:0009167;GO:0009168;GO:0009259;GO:0009260;GO:0009987;GO:0018130;GO:0032259;GO:0034641;GO:0034654;GO:0044237;GO:0044238;GO:0044249;GO:0044271;GO:0044281;GO:0046040;GO:0046483;GO:…	GO:0003824;GO:0004644;GO:0008168;GO:0016740;GO:0016741;GO:0016742		ko00230;ko00670	130.8	0	23.343	13237333	14248333	21099000	19691666	3.13392	0.27327	-0.028199	4.82053	-0.202431	2.60839	-0.171157	1.39134	-0.142958	1.86146	-0.174232	0.542054	0.0312743	Q9KPY5	>tr|Q9KPY5|Q9KPY5_VIBCH Phosphoribosylglycinamide formyltransferase OS=Vibrio cholerae serotype O1 (strain ATCC 39315 / El Tor Inaba N16961) GN=purN PE=3 SV=1
7.78745	7.95414	7.98494	7.54995	7.7267	7.73381	7.40285	7.48654	7.4846	7.58363	7.47054	7.45367	+	+	+	+		+		biosynthetic process;cellular aromatic compound metabolic process;cellular biosynthetic process;cellular metabolic compound salvage;cellular metabolic process;cellular nitrogen compound biosynthetic process;cellular nitrogen compound metabolic process;cellular process;heterocycle biosynthetic process;heterocycle metabolic process;metabolic process;nitrogen compound metabolic process;nucleobase me…	binding;catalytic activity;cation binding;GTP binding;guanyl nucleotide binding;guanyl ribonucleotide binding;ion binding;magnesium ion binding;metal ion binding;nucleotide binding;purine nucleotide binding;purine ribonucleoside triphosphate binding;purine ribonucleotide binding;ribonucleotide binding;transferase activity;transferase activity, transferring glycosyl groups;transferase activity, tr…		Pyrimidine metabolism	GO:0006139;GO:0006206;GO:0006213;GO:0006220;GO:0006221;GO:0006222;GO:0006223;GO:0006725;GO:0006753;GO:0006807;GO:0008152;GO:0008655;GO:0009058;GO:0009112;GO:0009116;GO:0009117;GO:0009119;GO:0009123;GO:0009124;GO:0009129;GO:0009130;GO:0009156;GO:0009161;GO:0009165;GO:0009173;GO:0009174;GO:0009218;GO:0009220;GO:0009259;GO:0009260;GO:0009987;GO:0010138;GO:0018130;GO:0019860;GO:0032262;GO:0034641;GO:…	GO:0000166;GO:0000287;GO:0003824;GO:0004845;GO:0005488;GO:0005525;GO:0016740;GO:0016757;GO:0016763;GO:0017076;GO:0019001;GO:0032553;GO:0032555;GO:0032561;GO:0035639;GO:0043167;GO:0043169;GO:0046872		ko00240	121.22	0	22.692	82623000	47650000	28821000	32103334	3.10575	1.30198	0.238691	2.58882	0.450847	2.27742	0.406229	1.08383	0.167538	1.48556	0.212156	0.380724	-0.0446181	Q9KPY7	>sp|Q9KPY7|UPP_VIBCH Uracil phosphoribosyltransferase OS=Vibrio cholerae serotype O1 (strain ATCC 39315 / El Tor Inaba N16961) GN=upp PE=3 SV=1
7.02432	7.18633	7.14591	7.22991	7.32773	7.14142	7.30046	7.21024	7.29447	7.40221	7.57925	7.51037	+			+	+		+	biological regulation;cell motility;cellular component movement;cellular process;ciliary or flagellar motility;locomotion;negative regulation of biological process;negative regulation of biosynthetic process;negative regulation of cellular biosynthetic process;negative regulation of cellular macromolecule biosynthetic process;negative regulation of cellular metabolic process;negative regulation o…			Flagellar assembly	GO:0001539;GO:0006355;GO:0006928;GO:0009889;GO:0009890;GO:0009892;GO:0009987;GO:0010468;GO:0010556;GO:0010558;GO:0010605;GO:0010629;GO:0019219;GO:0019222;GO:0031323;GO:0031324;GO:0031326;GO:0031327;GO:0040011;GO:0045892;GO:0045934;GO:0048519;GO:0048523;GO:0048870;GO:0050789;GO:0050794;GO:0051171;GO:0051172;GO:0051252;GO:0051253;GO:0060255;GO:0065007;GO:0080090;GO:2000112;GO:2000113			ko02040	264.88	0	11.102	13309000	17365334	18633666	31862334	2.54358	0.719522	-0.114164	1.23778	-0.149534	2.2268	-0.37842	1.62238	-0.264256	0.226086	-0.0353707	1.74384	-0.228886	Q9KQ03	>tr|Q9KQ03|Q9KQ03_VIBCH Negative regulator of flagellin synthesis FlgM, putative OS=Vibrio cholerae serotype O1 (strain ATCC 39315 / El Tor Inaba N16961) GN=VC_2204 PE=4 SV=1
7.40255	7.48673	7.42149	7.52005	7.58916	7.48416	7.29039	7.28364	7.31574	7.29713	7.45524	7.47311	+		+			+		cell motility;cell projection assembly;cell projection organization;cellular component assembly;cellular component assembly at cellular level;cellular component movement;cellular component organization;cellular component organization at cellular level;cellular component organization or biogenesis;cellular component organization or biogenesis at cellular level;cellular process;ciliary or flagellar…			Flagellar assembly	GO:0001539;GO:0006928;GO:0009296;GO:0009987;GO:0016043;GO:0022607;GO:0030030;GO:0030031;GO:0040011;GO:0043064;GO:0048870;GO:0071840;GO:0071841;GO:0071842;GO:0071844			ko02040	142.02	0	24.994	27443666	34145332	19806666	26023666	2.02393	1.10762	-0.0941982	2.16798	0.140333	0.175431	0.0284322	0.895602	0.12263	2.71764	0.234531	0.920792	-0.111901	Q9KQ09	>tr|Q9KQ09|Q9KQ09_VIBCH Basal-body rod modification protein FlgD OS=Vibrio cholerae serotype O1 (strain ATCC 39315 / El Tor Inaba N16961) GN=VC_2198 PE=3 SV=1
8.1069	8.15891	8.17557	8.19849	8.25115	8.2006	8.17725	8.18373	8.18199	8.18267	8.21646	8.19407	+							cell motility;cellular component movement;cellular process;ciliary or flagellar motility;locomotion	catalytic activity;hydrolase activity;hydrolase activity, acting on acid anhydrides;hydrolase activity, acting on acid anhydrides, in phosphorus-containing anhydrides;motor activity;nucleoside-triphosphatase activity;pyrophosphatase activity;structural molecule activity	bacterial-type flagellum basal body, rod;bacterial-type flagellum hook;bacterial-type flagellum part;cell part;cell projection part;flagellum part;intracellular part;organelle part	Flagellar assembly	GO:0001539;GO:0006928;GO:0009987;GO:0040011;GO:0048870	GO:0003774;GO:0003824;GO:0005198;GO:0016462;GO:0016787;GO:0016817;GO:0016818;GO:0017111	GO:0009424;GO:0030694;GO:0044422;GO:0044424;GO:0044460;GO:0044461;GO:0044463;GO:0044464	ko02040	323.31	0	46.845	140636672	164983328	151703328	157746672	1.33973	1.21592	-0.069623	0.7487	-0.0338605	1.03624	-0.0506064	0.405957	0.0190166	0.967113	0.0357625	0.761957	-0.0167459	Q9KQ10	>tr|Q9KQ10|Q9KQ10_VIBCH Flagellar hook protein FlgE OS=Vibrio cholerae serotype O1 (strain ATCC 39315 / El Tor Inaba N16961) GN=VC_2197 PE=3 SV=1
7.74405	7.77047	7.71232	7.74833	7.75477	7.67823	7.5617	7.6788	7.55365	7.70373	7.68894	7.71702	+		+					cell motility;cell projection assembly;cell projection organization;cellular component assembly;cellular component assembly at cellular level;cellular component movement;cellular component organization;cellular component organization at cellular level;cellular component organization or biogenesis;cellular component organization or biogenesis at cellular level;cellular process;ciliary or flagellar…	structural molecule activity	bacterial-type flagellum hook;bacterial-type flagellum part;cell part;cell projection part;flagellum part;intracellular part;organelle part	Flagellar assembly	GO:0001539;GO:0006928;GO:0009296;GO:0009987;GO:0016043;GO:0022607;GO:0030030;GO:0030031;GO:0040011;GO:0043064;GO:0048870;GO:0071840;GO:0071841;GO:0071842;GO:0071844	GO:0005198	GO:0009424;GO:0044422;GO:0044424;GO:0044460;GO:0044461;GO:0044463;GO:0044464	ko02040	241.44	0	68.688	55326000	53514000	39987332	50510332	1.82201	0.196099	0.0151699	1.52108	0.14423	0.980666	0.0390515	0.39004	0.0238816	1.27991	0.12906	1.19853	-0.105179	Q9KQ16	>tr|Q9KQ16|Q9KQ16_VIBCH Flagellar hook-associated protein FlgM OS=Vibrio cholerae serotype O1 (strain ATCC 39315 / El Tor Inaba N16961) GN=VC_2191 PE=4 SV=1
7.44787	7.44508	7.45796	7.4828	7.48978	7.3721	7.31967	7.35858	7.38516	7.35451	7.41676	7.36953	+		+	+				cell motility;cellular component movement;cellular process;ciliary or flagellar motility;locomotion	structural molecule activity	bacterial-type flagellum hook;bacterial-type flagellum part;cell part;cell projection part;flagellum part;intracellular part;organelle part	Flagellar assembly	GO:0001539;GO:0006928;GO:0009987;GO:0040011;GO:0048870	GO:0005198	GO:0009424;GO:0044422;GO:0044424;GO:0044460;GO:0044461;GO:0044463;GO:0044464	ko02040	322.83	0	44.943	28205666	28279334	22662000	24048334	1.35789	0.0179926	0.00207456	2.10569	0.0958312	1.66433	0.0700343	0.733099	0.0679598	1.03365	0.0937567	0.410271	-0.0257969	Q9KQ17	>tr|Q9KQ17|Q9KQ17_VIBCH Flagellar hook-associated protein FlgL OS=Vibrio cholerae serotype O1 (strain ATCC 39315 / El Tor Inaba N16961) GN=VC_2190 PE=3 SV=1
6.92065	7.02886	7.0269	6.93174	6.98712	6.71936	7.27254	7.30023	7.001	7.44436	7.34453	7.38575	+			+	+				binding;GTP binding;guanyl nucleotide binding;guanyl ribonucleotide binding;nucleotide binding;purine nucleotide binding;purine ribonucleoside triphosphate binding;purine ribonucleotide binding;ribonucleotide binding				GO:0000166;GO:0005488;GO:0005525;GO:0017076;GO:0019001;GO:0032553;GO:0032555;GO:0032561;GO:0035639			52.276	0	41.734	9885333	7.83123e+06	16238667	24745000	2.53296	0.56154	0.112726	0.911918	-0.19912	3.01363	-0.399411	2.38806	-0.512138	1.16758	-0.311846	0.938938	-0.200292	Q9KQ20	>tr|Q9KQ20|Q9KQ20_VIBCH Ribosome-binding ATPase YchF OS=Vibrio cholerae serotype O1 (strain ATCC 39315 / El Tor Inaba N16961) GN=ychF PE=3 SV=1
7.12447	7.08586	7.19893	7.09391	7.03205	6.98299	7.09093	7.1819	7.19637	7.07467	7.03563	6.94658	+								binding;nucleic acid binding;RNA binding;translation factor activity, nucleic acid binding;translation release factor activity;translation release factor activity, codon specific;translation termination factor activity	cell part;cytoplasm;intracellular part			GO:0003676;GO:0003723;GO:0003747;GO:0005488;GO:0008079;GO:0008135;GO:0016149	GO:0005737;GO:0044424;GO:0044464		200.31	0	40.221	13771667	10931933	14416000	10524533	1.31869	1.01785	0.100104	0.160247	-0.0199779	1.09633	0.117462	0.128222	0.0173572	1.22545	-0.120082	1.28242	0.137439	Q9KQ25	>sp|Q9KQ25|RF1_VIBCH Peptide chain release factor 1 OS=Vibrio cholerae serotype O1 (strain ATCC 39315 / El Tor Inaba N16961) GN=prfA PE=3 SV=1
8.20262	8.19404	8.15924	8.12189	8.19287	8.18837	8.2055	8.22401	8.29263	8.11856	8.05373	8.16964	+						+	alcohol biosynthetic process;alcohol metabolic process;biosynthetic process;carbohydrate biosynthetic process;carbohydrate metabolic process;carboxylic acid biosynthetic process;carboxylic acid metabolic process;cellular biosynthetic process;cellular carbohydrate biosynthetic process;cellular carbohydrate metabolic process;cellular ketone metabolic process;cellular metabolic process;cellular proc…	3-deoxy-8-phosphooctulonate synthase activity;catalytic activity;transferase activity;transferase activity, transferring alkyl or aryl (other than methyl) groups	cell part;cytoplasm;intracellular part	Lipopolysaccharide biosynthesis	GO:0005975;GO:0005996;GO:0006066;GO:0006082;GO:0008152;GO:0009058;GO:0009987;GO:0016051;GO:0016053;GO:0019294;GO:0019752;GO:0034637;GO:0042180;GO:0043436;GO:0044237;GO:0044238;GO:0044249;GO:0044262;GO:0044281;GO:0044283;GO:0046165;GO:0046364;GO:0046394;GO:0046400	GO:0003824;GO:0008676;GO:0016740;GO:0016765	GO:0005737;GO:0044424;GO:0044464	ko00540	116.08	0	30.773	153356672	147536672	174726672	130783336	1.36038	0.265045	0.0175915	0.870118	-0.0554161	0.923886	0.0713212	0.590638	0.0537297	0.975858	-0.0730076	1.38346	0.126737	Q9KQ29	>sp|Q9KQ29|KDSA_VIBCH 2-dehydro-3-deoxyphosphooctonate aldolase OS=Vibrio cholerae serotype O1 (strain ATCC 39315 / El Tor Inaba N16961) GN=kdsA PE=3 SV=1
8.20153	8.26771	8.22321	8.2448	8.26666	8.30653	8.42464	8.44501	8.3282	8.61941	8.66663	8.63157	+		+	+	+	+	+	catabolic process;cellular catabolic process;cellular metabolic process;cellular nitrogen compound catabolic process;cellular nitrogen compound metabolic process;cellular process;metabolic process;nitrogen compound metabolic process;nucleobase-containing compound catabolic process;nucleobase-containing compound metabolic process;nucleobase-containing small molecule metabolic process;nucleoside ph…	5'-nucleotidase activity;binding;catalytic activity;cation binding;hydrolase activity;hydrolase activity, acting on ester bonds;ion binding;metal ion binding;nucleotidase activity;nucleotide binding;phosphatase activity;phosphoric ester hydrolase activity	cell outer membrane;cell part;external encapsulating structure part;membrane;outer membrane;plasma membrane	Nicotinate and nicotinamide metabolism;Purine metabolism;Pyrimidine metabolism	GO:0006139;GO:0006753;GO:0006807;GO:0008152;GO:0009056;GO:0009117;GO:0009166;GO:0009225;GO:0009987;GO:0034641;GO:0034655;GO:0044237;GO:0044238;GO:0044248;GO:0044270;GO:0044281;GO:0055086	GO:0000166;GO:0003824;GO:0005488;GO:0008252;GO:0008253;GO:0016787;GO:0016788;GO:0016791;GO:0042578;GO:0043167;GO:0043169;GO:0046872	GO:0005886;GO:0009279;GO:0016020;GO:0019867;GO:0044462;GO:0044464	ko00230;ko00240;ko00760	274.05	0	60.902	170490000	187680000	252460000	436180000	5.13405	0.720239	-0.0418428	1.83293	-0.168463	4.14948	-0.408382	4.04592	-0.36654	1.45848	-0.126621	2.46275	-0.239919	Q9KQ30	>sp|Q9KQ30|5NTD_VIBCH 5-nucleotidase OS=Vibrio cholerae serotype O1 (strain ATCC 39315 / El Tor Inaba N16961) GN=nutA PE=3 SV=1
7.68042	7.65	7.64372	7.65968	7.73644	7.70371	7.57006	7.63895	7.71388	7.75536	7.75853	7.77046	+			+			+									162.93	0	42.133	45534668	50243000	44150332	57742668	1.48363	0.773359	-0.0418983	0.147662	0.0170811	2.96977	-0.103404	1.27065	-0.0615055	0.554751	0.0589794	1.34828	-0.120485	Q9KQ36	>tr|Q9KQ36|Q9KQ36_VIBCH Uncharacterized protein OS=Vibrio cholerae serotype O1 (strain ATCC 39315 / El Tor Inaba N16961) GN=VC_2168 PE=4 SV=1
7.16994	7.19193	7.1827	6.95227	7.09363	6.9036	7.19016	7.2137	6.99261	6.94364	6.94345	6.97075	+	+		+				amine metabolic process;aromatic amino acid family metabolic process;carboxylic acid metabolic process;cellular amine metabolic process;cellular amino acid metabolic process;cellular aromatic compound metabolic process;cellular biogenic amine metabolic process;cellular ketone metabolic process;cellular metabolic process;cellular nitrogen compound metabolic process;cellular process;heterocycle met…	binding;catalytic activity;coenzyme binding;cofactor binding;electron carrier activity;FMN binding;nucleotide binding;oxidoreductase activity			GO:0006082;GO:0006520;GO:0006568;GO:0006576;GO:0006586;GO:0006725;GO:0006807;GO:0008152;GO:0009072;GO:0009308;GO:0009987;GO:0019752;GO:0034641;GO:0042180;GO:0042430;GO:0043436;GO:0044106;GO:0044237;GO:0044238;GO:0044281;GO:0046483;GO:0055114	GO:0000166;GO:0003824;GO:0005488;GO:0009055;GO:0010181;GO:0016491;GO:0048037;GO:0050662			94.194	0	20.062	15192000	9791567	13894100	8970267	1.72118	1.58763	0.198353	0.282489	0.0493622	4.48836	0.228907	0.20446	0.0305538	0.758271	-0.148991	1.19392	0.179545	Q9KQ38	>tr|Q9KQ38|Q9KQ38_VIBCH Trp repressor-binding protein OS=Vibrio cholerae serotype O1 (strain ATCC 39315 / El Tor Inaba N16961) GN=VC_2166 PE=4 SV=1
7.51947	7.57566	7.51567	7.63286	7.60304	7.52996	7.40293	7.27187	7.4712	7.35689	7.44257	7.40269	+			+	+	+		response to arsenic-containing substance;response to chemical stimulus;response to inorganic substance;response to stimulus	arsenate reductase (glutaredoxin) activity;arsenate reductase activity;catalytic activity;oxidoreductase activity;oxidoreductase activity, acting on phosphorus or arsenic in donors;oxidoreductase activity, acting on phosphorus or arsenic in donors, disulfide as acceptor			GO:0010035;GO:0042221;GO:0046685;GO:0050896	GO:0003824;GO:0008794;GO:0016491;GO:0030611;GO:0030613;GO:0030614			92.87	0	13.173	34499668	38970332	24528000	25242000	2.01906	0.644776	-0.0516815	1.18212	0.154936	1.90891	0.13622	2.05574	0.187901	1.45399	0.206618	0.106303	-0.018717	Q9KQ39	>tr|Q9KQ39|Q9KQ39_VIBCH Arsenate reductase OS=Vibrio cholerae serotype O1 (strain ATCC 39315 / El Tor Inaba N16961) GN=VC_2165 PE=1 SV=1
[truncated: 711 more rows]

## Sheet: Biofilm 1
Biofilm activities from Table 1
[truncated: 13 more rows]
[truncated: 1 more columns]

## Sheet: Version_2_0757FeCa_perseus tabl
Table 2: Proteins that only were detected in some of the conditions (but not in all 4 conditions)
[truncated: 340 more rows]

[truncated: 8 more sheets: Biofilm v2.0, Biofilm all, 37Cvs22C, mut 37Cvs22C, 37C mutvswt, 22C mutvswt, Identified proteins, GOBP_function_overrepresent]
